# Supplementary material for: PacBio full-length transcriptome of wild apple (Malus sieversii) provides insights into canker disease dynamic response
Source: BMC Genomics. 2021 Jan 14;22:52. doi: 10.1186/s12864-021-07366-y (PMC7809858; doi:10.1186/s12864-021-07366-y)
Supplement: Supplementary file 2 — Additional file 2. Details regarding AS. [file 12864_2021_7366_MOESM2_ESM.xlsx]

## Sheet: Mix0_5d_AS_total
Chr_id	Gene_id	Strand	Type	Alt_exon_pos	Alt_trans	Total_trans
Chr00	MD00G1001400	-	A3	288378-288352	MD00G1001400_novel02	MD00G1001400,MD00G1001400_novel01,MD00G1001400_novel15,MD00G1001400_novel14,MD00G1001400_novel06,MD00G1001400_novel07,MD00G1001400_novel12,MD00G1001400_novel04,MD00G1001400_novel11,MD00G1001400_novel08,MD00G1001400_novel03,MD00G1001400_novel09,MD00G1001400_novel13,MD00G1001400_novel05,MD00G1001400_novel02
Chr00	MD00G1001400	-	A3	292861-292725	MD00G1001400_novel05	MD00G1001400_novel01,MD00G1001400_novel05
Chr00	MD00G1006700	-	A3	961240-961237	MD00G1006700_novel05	MD00G1006700,MD00G1006700_novel02,MD00G1006700_novel10,MD00G1006700_novel08,MD00G1006700_novel03,MD00G1006700_novel14,MD00G1006700_novel13,MD00G1006700_novel12,MD00G1006700_novel09,MD00G1006700_novel04,MD00G1006700_novel01,MD00G1006700_novel11,MD00G1006700_novel15,MD00G1006700_novel07,MD00G1006700_novel06,MD00G1006700_novel05
Chr00	MD00G1006700	-	A3	961440-961395	MD00G1006700_novel13,MD00G1006700_novel10,MD00G1006700_novel11,MD00G1006700,MD00G1006700_novel15,MD00G1006700_novel05,MD00G1006700_novel04,MD00G1006700_novel07,MD00G1006700_novel06,MD00G1006700_novel14,MD00G1006700_novel03,MD00G1006700_novel02,MD00G1006700_novel09,MD00G1006700_novel08	MD00G1006700_novel12,MD00G1006700_novel05,MD00G1006700,MD00G1006700_novel02,MD00G1006700_novel10,MD00G1006700_novel08,MD00G1006700_novel03,MD00G1006700_novel14,MD00G1006700_novel13,MD00G1006700_novel09,MD00G1006700_novel04,MD00G1006700_novel11,MD00G1006700_novel15,MD00G1006700_novel07,MD00G1006700_novel06
Chr00	MD00G1006700	-	A3	962526-962261	MD00G1006700_novel13,MD00G1006700_novel11,MD00G1006700,MD00G1006700_novel07,MD00G1006700_novel14	MD00G1006700_novel02,MD00G1006700_novel08,MD00G1006700_novel12,MD00G1006700_novel01,MD00G1006700_novel06,MD00G1006700,MD00G1006700_novel14,MD00G1006700_novel13,MD00G1006700_novel11,MD00G1006700_novel07
Chr00	MD00G1007600	+	A3	1032072-1032192	MD00G1007600,MD00G1007600_novel03,MD00G1007600_novel02	MD00G1007600_novel01,MD00G1007600,MD00G1007600_novel02,MD00G1007600_novel03
Chr00	MD00G1007700	-	A3	1035701-1034947	MD00G1007700	MD00G1007700_novel03,MD00G1007700
Chr00	MD00G1009000	+	A3	1135530-1135557	MD00G1009000_novel03	MD00G1009000,MD00G1009000_novel01,MD00G1009000_novel02,MD00G1009000_novel07,MD00G1009000_novel04,MD00G1009000_novel08,MD00G1009000_novel09,MD00G1009000_novel10,MD00G1009000_novel03
Chr00	MD00G1009000	+	A3	1135530-1136223	MD00G1009000_novel05	MD00G1009000_novel07,MD00G1009000_novel05
Chr00	MD00G1009000	+	A3	1136700-1136752	MD00G1009000_novel03,MD00G1009000_novel01,MD00G1009000_novel08,MD00G1009000_novel06,MD00G1009000_novel05,MD00G1009000_novel04,MD00G1009000_novel09,MD00G1009000_novel10,MD00G1009000	MD00G1009000_novel02,MD00G1009000,MD00G1009000_novel01,MD00G1009000_novel05,MD00G1009000_novel03,MD00G1009000_novel06,MD00G1009000_novel04,MD00G1009000_novel08,MD00G1009000_novel09,MD00G1009000_novel10
Chr00	MD00G1009300	+	A3	1161736-1161837	MD00G1009300_novel02,MD00G1009300_novel05	MD00G1009300,MD00G1009300_novel03,MD00G1009300_novel01,MD00G1009300_novel04,MD00G1009300_novel06,MD00G1009300_novel02,MD00G1009300_novel05
Chr00	MD00G1009300	+	A3	1163886-1163899	MD00G1009300_novel04	MD00G1009300,MD00G1009300_novel02,MD00G1009300_novel03,MD00G1009300_novel01,MD00G1009300_novel05,MD00G1009300_novel07,MD00G1009300_novel06,MD00G1009300_novel04
Chr00	MD00G1010000	-	A3	1235300-1235141	MD00G1010000_novel04,MD00G1010000_novel03,MD00G1010000	MD00G1010000_novel01,MD00G1010000_novel03,MD00G1010000,MD00G1010000_novel04
Chr00	MD00G1013000	-	A3	1627938-1627929	MD00G1013000_novel02	MD00G1013000,MD00G1013000_novel01,MD00G1013000_novel02
Chr00	MD00G1014400	+	A3	1792335-1792398	MD00G1014400_novel01	MD00G1014400_novel03,MD00G1014400_novel01
Chr00	MD00G1014400	+	A3	1792628-1792643	MD00G1014400_novel03	MD00G1014400_novel02,MD00G1014400_novel03
Chr00	MD00G1016700	+	A3	2404233-2404270	MD00G1016700_novel02	MD00G1016700,MD00G1016700_novel01,MD00G1016700_novel04,MD00G1016700_novel05,MD00G1016700_novel02
Chr00	MD00G1017000	-	A3	2496259-2496246	MD00G1017000_novel01	MD00G1017000_novel02,MD00G1017000_novel01
Chr00	MD00G1017100	-	A3	2501775-2501766	MD00G1017100_novel01	MD00G1017100_novel02,MD00G1017100,MD00G1017100_novel01
Chr00	MD00G1018700	-	A3	3199436-3199381	MD00G1018700,MD00G1018700_novel01	MD00G1018700_novel02,MD00G1018700,MD00G1018700_novel01
Chr00	MD00G1019700	+	A3	3617218-3617309	MD00G1019700_novel01,MD00G1019700_novel03	MD00G1019700,MD00G1019700_novel04,MD00G1019700_novel10,MD00G1019700_novel11,MD00G1019700_novel01,MD00G1019700_novel03
Chr00	MD00G1022900	-	A3	3864793-3864663	MD00G1022900,MD00G1022900_novel03,MD00G1022900_novel02	MD00G1022900_novel01,MD00G1022900_novel02,MD00G1022900,MD00G1022900_novel03
Chr00	MD00G1022900	-	A3	3866514-3866491	MD00G1022900_novel01,MD00G1022900_novel03,MD00G1022900_novel02	MD00G1022900,MD00G1022900_novel02,MD00G1022900_novel03,MD00G1022900_novel01
Chr00	MD00G1023700	-	A3	3944014-3944002	MD00G1023700_novel01	MD00G1023700,MD00G1023700_novel01
Chr00	MD00G1023700	-	A3	3944250-3944207	MD00G1023700_novel01	MD00G1023700_novel02,MD00G1023700,MD00G1023700_novel01
Chr00	MD00G1025200	-	A3	4329545-4329281	MD00G1025200_novel04	MD00G1025200_novel02,MD00G1025200_novel04
Chr00	MD00G1028300	-	A3	4619728-4619697	MD00G1028300_novel01,MD00G1028300_novel02	MD00G1028300,MD00G1028300_novel02,MD00G1028300_novel01
Chr00	MD00G1028900	+	A3	4743530-4743801	MD00G1028900	MD00G1028900_novel01,MD00G1028900
Chr00	MD00G1030000	+	A3	4854678-4854723	MD00G1030000_novel02	MD00G1030000,MD00G1030000_novel03,MD00G1030000_novel04,MD00G1030000_novel02
Chr00	MD00G1031100	+	A3	5162032-5162060	MD00G1031100	MD00G1031100_novel03,MD00G1031100_novel04,MD00G1031100_novel01,MD00G1031100_novel02,MD00G1031100
Chr00	MD00G1031100	+	A3	5172362-5172366	MD00G1031100_novel05	MD00G1031100_novel03,MD00G1031100_novel04,MD00G1031100_novel01,MD00G1031100_novel02,MD00G1031100,MD00G1031100_novel06,MD00G1031100_novel07,MD00G1031100_novel08,MD00G1031100_novel09,MD00G1031100_novel10,MD00G1031100_novel11,MD00G1031100_novel05
Chr00	MD00G1031100	+	A3	5173578-5173624	MD00G1031100_novel08	MD00G1031100_novel03,MD00G1031100_novel04,MD00G1031100_novel01,MD00G1031100_novel02,MD00G1031100,MD00G1031100_novel05,MD00G1031100_novel06,MD00G1031100_novel07,MD00G1031100_novel09,MD00G1031100_novel10,MD00G1031100_novel11,MD00G1031100_novel12,MD00G1031100_novel08
Chr00	MD00G1031200	-	A3	5202032-5201970	MD00G1031200_novel08,MD00G1031200_novel09	MD00G1031200,MD00G1031200_novel02,MD00G1031200_novel05,MD00G1031200_novel03,MD00G1031200_novel07,MD00G1031200_novel10,MD00G1031200_novel09,MD00G1031200_novel08
Chr00	MD00G1031200	-	A3	5202244-5202032	MD00G1031200_novel06	MD00G1031200_novel01,MD00G1031200_novel06
Chr00	MD00G1031200	-	A3	5203415-5203394	MD00G1031200_novel06,MD00G1031200_novel07,MD00G1031200_novel05,MD00G1031200_novel03,MD00G1031200_novel01,MD00G1031200,MD00G1031200_novel08,MD00G1031200_novel09	MD00G1031200_novel10,MD00G1031200_novel01,MD00G1031200,MD00G1031200_novel05,MD00G1031200_novel03,MD00G1031200_novel06,MD00G1031200_novel09,MD00G1031200_novel07,MD00G1031200_novel08
Chr00	MD00G1031900	-	A3	5573922-5573901	MD00G1031900,MD00G1031900_novel02	MD00G1031900_novel01,MD00G1031900_novel02,MD00G1031900
Chr00	MD00G1032200	+	A3	5608890-5609044	MD00G1032200	MD00G1032200_novel01,MD00G1032200
Chr00	MD00G1032200	+	A3	5609266-5609269	MD00G1032200,MD00G1032200_novel02	MD00G1032200_novel01,MD00G1032200,MD00G1032200_novel02
Chr00	MD00G1035000	+	A3	6100886-6100889	MD00G1035000_novel04,MD00G1035000_novel05,MD00G1035000_novel06,MD00G1035000_novel07,MD00G1035000_novel01,MD00G1035000_novel02,MD00G1035000_novel03	MD00G1035000,MD00G1035000_novel06,MD00G1035000_novel05,MD00G1035000_novel03,MD00G1035000_novel01,MD00G1035000_novel07,MD00G1035000_novel02,MD00G1035000_novel04
Chr00	MD00G1035000	+	A3	6101163-6101977	MD00G1035000_novel01	MD00G1035000_novel06,MD00G1035000_novel07,MD00G1035000_novel02,MD00G1035000_novel01
Chr00	MD00G1035000	+	A3	6101518-6101758	MD00G1035000_novel04,MD00G1035000_novel05,MD00G1035000_novel03	MD00G1035000,MD00G1035000_novel05,MD00G1035000_novel03,MD00G1035000_novel04
Chr00	MD00G1041200	+	A3	7292537-7292577	MD00G1041200_novel01	MD00G1041200,MD00G1041200_novel01
Chr00	MD00G1041200	+	A3	7293286-7293303	MD00G1041200	MD00G1041200_novel01,MD00G1041200
Chr00	MD00G1041900	+	A3	7643398-7643415	MD00G1041900_novel01,MD00G1041900_novel04,MD00G1041900	MD00G1041900_novel03,MD00G1041900_novel01,MD00G1041900,MD00G1041900_novel04
Chr00	MD00G1043800	-	A3	7958964-7958936	MD00G1043800	MD00G1043800_novel01,MD00G1043800
Chr00	MD00G1049000	+	A3	9162881-9163038	MD00G1049000	MD00G1049000_novel02,MD00G1049000
Chr00	MD00G1050100	-	A3	9479785-9479757	MD00G1050100_novel04,MD00G1050100_novel06,MD00G1050100,MD00G1050100_novel02	MD00G1050100_novel01,MD00G1050100_novel02,MD00G1050100,MD00G1050100_novel06,MD00G1050100_novel04
Chr00	MD00G1050600	+	A3	9567105-9567112	MD00G1050600_novel01	MD00G1050600,MD00G1050600_novel01
Chr00	MD00G1050600	+	A3	9567664-9567682	MD00G1050600	MD00G1050600_novel01,MD00G1050600
Chr00	MD00G1051200	-	A3	9660956-9660939	MD00G1051200_novel01,MD00G1051200_novel02,MD00G1051200_novel03	MD00G1051200,MD00G1051200_novel01,MD00G1051200_novel03,MD00G1051200_novel02
Chr00	MD00G1051500	-	A3	9690730-9690691	MD00G1051500_novel01	MD00G1051500,MD00G1051500_novel01
Chr00	MD00G1053300	-	A3	9945376-9945366	MD00G1053300_novel01	MD00G1053300,MD00G1053300_novel01
Chr00	MD00G1055200	+	A3	10320195-10320214	MD00G1055200,MD00G1055200_novel06,MD00G1055200_novel07,MD00G1055200_novel13,MD00G1055200_novel01,MD00G1055200_novel11,MD00G1055200_novel03,MD00G1055200_novel10,MD00G1055200_novel09,MD00G1055200_novel12	MD00G1055200_novel04,MD00G1055200,MD00G1055200_novel01,MD00G1055200_novel06,MD00G1055200_novel09,MD00G1055200_novel11,MD00G1055200_novel03,MD00G1055200_novel07,MD00G1055200_novel13,MD00G1055200_novel12,MD00G1055200_novel10
Chr00	MD00G1055200	+	A3	10323073-10324164	MD00G1055200_novel13	MD00G1055200_novel09,MD00G1055200_novel03,MD00G1055200_novel13
Chr00	MD00G1055200	+	A3	10323073-10325240	MD00G1055200,MD00G1055200_novel04,MD00G1055200_novel05,MD00G1055200_novel06,MD00G1055200_novel12,MD00G1055200_novel02,MD00G1055200_novel08,MD00G1055200_novel19,MD00G1055200_novel18	MD00G1055200_novel09,MD00G1055200_novel03,MD00G1055200,MD00G1055200_novel06,MD00G1055200_novel02,MD00G1055200_novel04,MD00G1055200_novel05,MD00G1055200_novel12,MD00G1055200_novel08,MD00G1055200_novel18,MD00G1055200_novel19
Chr00	MD00G1055800	+	A3	10466139-10466255	MD00G1055800_novel04	MD00G1055800,MD00G1055800_novel01,MD00G1055800_novel02,MD00G1055800_novel03,MD00G1055800_novel05,MD00G1055800_novel04
Chr00	MD00G1055800	+	A3	10468775-10468792	MD00G1055800_novel01	MD00G1055800,MD00G1055800_novel04,MD00G1055800_novel02,MD00G1055800_novel03,MD00G1055800_novel05,MD00G1055800_novel01
Chr00	MD00G1056700	-	A3	10558096-10558079	MD00G1056700	MD00G1056700_novel01,MD00G1056700
Chr00	MD00G1057800	+	A3	10618194-10618208	MD00G1057800	MD00G1057800_novel02,MD00G1057800
Chr00	MD00G1058500	-	A3	10653730-10653692	MD00G1058500	MD00G1058500_novel01,MD00G1058500
Chr00	MD00G1059100	-	A3	10825943-10825918	MD00G1059100_novel02	MD00G1059100,MD00G1059100_novel02
Chr00	MD00G1060100	-	A3	11177451-11177448	MD00G1060100_novel06,MD00G1060100_novel03,MD00G1060100_novel15,MD00G1060100_novel34	MD00G1060100_novel05,MD00G1060100_novel18,MD00G1060100,MD00G1060100_novel12,MD00G1060100_novel20,MD00G1060100_novel01,MD00G1060100_novel32,MD00G1060100_novel29,MD00G1060100_novel33,MD00G1060100_novel23,MD00G1060100_novel08,MD00G1060100_novel02,MD00G1060100_novel09,MD00G1060100_novel31,MD00G1060100_novel28,MD00G1060100_novel21,MD00G1060100_novel14,MD00G1060100_novel19,MD00G1060100_novel30,MD00G106…
Chr00	MD00G1060100	-	A3	11180808-11180453	MD00G1060100,MD00G1060100_novel33,MD00G1060100_novel30,MD00G1060100_novel13,MD00G1060100_novel25	MD00G1060100_novel01,MD00G1060100_novel02,MD00G1060100_novel09,MD00G1060100_novel31,MD00G1060100_novel14,MD00G1060100_novel26,MD00G1060100_novel16,MD00G1060100,MD00G1060100_novel33,MD00G1060100_novel30,MD00G1060100_novel25,MD00G1060100_novel13
Chr00	MD00G1060100	-	A3	11180818-11180453	MD00G1060100_novel33,MD00G1060100_novel30,MD00G1060100_novel13,MD00G1060100_novel25,MD00G1060100	MD00G1060100_novel17,MD00G1060100,MD00G1060100_novel33,MD00G1060100_novel30,MD00G1060100_novel25,MD00G1060100_novel13
Chr00	MD00G1060100	-	A3	11180818-11180808	MD00G1060100_novel08,MD00G1060100_novel20,MD00G1060100_novel31,MD00G1060100_novel32,MD00G1060100_novel07,MD00G1060100_novel14,MD00G1060100_novel06,MD00G1060100_novel16,MD00G1060100_novel28,MD00G1060100_novel01,MD00G1060100_novel23,MD00G1060100_novel26,MD00G1060100_novel18,MD00G1060100_novel19,MD00G1060100_novel09,MD00G1060100_novel02	MD00G1060100_novel17,MD00G1060100_novel18,MD00G1060100_novel20,MD00G1060100_novel01,MD00G1060100_novel32,MD00G1060100_novel06,MD00G1060100_novel23,MD00G1060100_novel08,MD00G1060100_novel02,MD00G1060100_novel09,MD00G1060100_novel31,MD00G1060100_novel28,MD00G1060100_novel14,MD00G1060100_novel19,MD00G1060100_novel26,MD00G1060100_novel16,MD00G1060100_novel07
Chr00	MD00G1060100	-	A3	11180835-11180453	MD00G1060100_novel33,MD00G1060100_novel30,MD00G1060100_novel13,MD00G1060100_novel25,MD00G1060100	MD00G1060100_novel10,MD00G1060100,MD00G1060100_novel33,MD00G1060100_novel30,MD00G1060100_novel25,MD00G1060100_novel13
Chr00	MD00G1060100	-	A3	11180835-11180808	MD00G1060100_novel08,MD00G1060100_novel20,MD00G1060100_novel32,MD00G1060100_novel07,MD00G1060100_novel14,MD00G1060100_novel06,MD00G1060100_novel16,MD00G1060100_novel31,MD00G1060100_novel28,MD00G1060100_novel01,MD00G1060100_novel23,MD00G1060100_novel26,MD00G1060100_novel18,MD00G1060100_novel19,MD00G1060100_novel09,MD00G1060100_novel02	MD00G1060100_novel10,MD00G1060100_novel18,MD00G1060100_novel20,MD00G1060100_novel01,MD00G1060100_novel32,MD00G1060100_novel06,MD00G1060100_novel23,MD00G1060100_novel08,MD00G1060100_novel02,MD00G1060100_novel09,MD00G1060100_novel31,MD00G1060100_novel28,MD00G1060100_novel14,MD00G1060100_novel19,MD00G1060100_novel26,MD00G1060100_novel16,MD00G1060100_novel07
Chr00	MD00G1060100	-	A3	11180835-11180818	MD00G1060100_novel17	MD00G1060100_novel10,MD00G1060100_novel17
Chr00	MD00G1060100	-	A3	11180838-11180453	MD00G1060100_novel33,MD00G1060100_novel30,MD00G1060100_novel25,MD00G1060100_novel13,MD00G1060100	MD00G1060100_novel12,MD00G1060100_novel15,MD00G1060100,MD00G1060100_novel33,MD00G1060100_novel30,MD00G1060100_novel25,MD00G1060100_novel13
Chr00	MD00G1060100	-	A3	11180838-11180808	MD00G1060100_novel08,MD00G1060100_novel01,MD00G1060100_novel20,MD00G1060100_novel32,MD00G1060100_novel07,MD00G1060100_novel14,MD00G1060100_novel06,MD00G1060100_novel16,MD00G1060100_novel31,MD00G1060100_novel28,MD00G1060100_novel23,MD00G1060100_novel26,MD00G1060100_novel18,MD00G1060100_novel19,MD00G1060100_novel09,MD00G1060100_novel02	MD00G1060100_novel12,MD00G1060100_novel15,MD00G1060100_novel18,MD00G1060100_novel20,MD00G1060100_novel01,MD00G1060100_novel32,MD00G1060100_novel06,MD00G1060100_novel23,MD00G1060100_novel08,MD00G1060100_novel02,MD00G1060100_novel09,MD00G1060100_novel31,MD00G1060100_novel28,MD00G1060100_novel14,MD00G1060100_novel19,MD00G1060100_novel26,MD00G1060100_novel16,MD00G1060100_novel07
Chr00	MD00G1060100	-	A3	11180838-11180818	MD00G1060100_novel17	MD00G1060100_novel12,MD00G1060100_novel15,MD00G1060100_novel17
Chr00	MD00G1060100	-	A3	11180838-11180835	MD00G1060100_novel10	MD00G1060100_novel12,MD00G1060100_novel15,MD00G1060100_novel10
Chr00	MD00G1060100	-	A3	11182437-11182343	MD00G1060100_novel06,MD00G1060100_novel02,MD00G1060100_novel24,MD00G1060100_novel21	MD00G1060100_novel01,MD00G1060100_novel07,MD00G1060100_novel06,MD00G1060100_novel02,MD00G1060100_novel21,MD00G1060100_novel24
Chr00	MD00G1060100	-	A3	11184887-11184843	MD00G1060100_novel04	MD00G1060100_novel05,MD00G1060100_novel18,MD00G1060100,MD00G1060100_novel12,MD00G1060100_novel20,MD00G1060100_novel01,MD00G1060100_novel03,MD00G1060100_novel06,MD00G1060100_novel23,MD00G1060100_novel08,MD00G1060100_novel02,MD00G1060100_novel09,MD00G1060100_novel21,MD00G1060100_novel15,MD00G1060100_novel14,MD00G1060100_novel19,MD00G1060100_novel16,MD00G1060100_novel13,MD00G1060100_novel22,MD00G106…
Chr00	MD00G1063900	+	A3	11972804-11972807	MD00G1063900,MD00G1063900_novel03,MD00G1063900_novel06,MD00G1063900_novel07,MD00G1063900_novel04,MD00G1063900_novel05	MD00G1063900_novel02,MD00G1063900_novel03,MD00G1063900,MD00G1063900_novel04,MD00G1063900_novel05,MD00G1063900_novel06,MD00G1063900_novel07
Chr00	MD00G1063900	+	A3	11973531-11973534	MD00G1063900,MD00G1063900_novel02,MD00G1063900_novel03,MD00G1063900_novel06,MD00G1063900_novel07,MD00G1063900_novel05	MD00G1063900_novel04,MD00G1063900_novel02,MD00G1063900_novel03,MD00G1063900,MD00G1063900_novel05,MD00G1063900_novel06,MD00G1063900_novel07
Chr00	MD00G1064400	-	A3	12108137-12108127	MD00G1064400_novel02	MD00G1064400,MD00G1064400_novel02
Chr00	MD00G1068700	+	A3	13474297-13474307	MD00G1068700_novel03	MD00G1068700,MD00G1068700_novel02,MD00G1068700_novel01,MD00G1068700_novel04,MD00G1068700_novel03
Chr00	MD00G1075400	-	A3	15242626-15242613	MD00G1075400,MD00G1075400_novel02	MD00G1075400_novel01,MD00G1075400,MD00G1075400_novel02
Chr00	MD00G1076300	+	A3	15352003-15352012	MD00G1076300_novel03	MD00G1076300,MD00G1076300_novel01,MD00G1076300_novel02,MD00G1076300_novel05,MD00G1076300_novel03
Chr00	MD00G1076400	-	A3	15357549-15357495	MD00G1076400_novel05,MD00G1076400_novel07,MD00G1076400_novel03,MD00G1076400_novel09,MD00G1076400_novel08,MD00G1076400,MD00G1076400_novel12,MD00G1076400_novel13,MD00G1076400_novel10,MD00G1076400_novel11,MD00G1076400_novel14	MD00G1076400_novel04,MD00G1076400_novel09,MD00G1076400_novel03,MD00G1076400_novel12,MD00G1076400_novel07,MD00G1076400_novel13,MD00G1076400_novel10,MD00G1076400_novel08,MD00G1076400,MD00G1076400_novel05,MD00G1076400_novel11,MD00G1076400_novel14
Chr00	MD00G1078100	-	A3	15542942-15542868	MD00G1078100,MD00G1078100_novel03	MD00G1078100_novel01,MD00G1078100_novel02,MD00G1078100,MD00G1078100_novel03
Chr00	MD00G1078300	-	A3	15585944-15585941	MD00G1078300	MD00G1078300_novel01,MD00G1078300
Chr00	MD00G1078300	-	A3	15597868-15597850	MD00G1078300	MD00G1078300_novel01,MD00G1078300
Chr00	MD00G1078400	+	A3	15607031-15607056	MD00G1078400_novel02	MD00G1078400_novel01,MD00G1078400_novel02
Chr00	MD00G1078500	-	A3	15862407-15862383	MD00G1078500_novel02,MD00G1078500_novel01	MD00G1078500,MD00G1078500_novel01,MD00G1078500_novel02
Chr00	MD00G1078900	-	A3	15880829-15880825	MD00G1078900_novel01,MD00G1078900_novel05	MD00G1078900,MD00G1078900_novel03,MD00G1078900_novel01,MD00G1078900_novel05
Chr00	MD00G1078900	-	A3	15882473-15882455	MD00G1078900_novel02,MD00G1078900_novel03,MD00G1078900_novel04,MD00G1078900_novel05,MD00G1078900	MD00G1078900_novel01,MD00G1078900,MD00G1078900_novel03,MD00G1078900_novel04,MD00G1078900_novel02,MD00G1078900_novel05
Chr00	MD00G1078900	-	A3	15886509-15886501	MD00G1078900_novel02,MD00G1078900_novel03,MD00G1078900_novel01,MD00G1078900_novel04,MD00G1078900	MD00G1078900_novel05,MD00G1078900,MD00G1078900_novel03,MD00G1078900_novel04,MD00G1078900_novel02,MD00G1078900_novel01
Chr00	MD00G1080000	-	A3	16032038-16031984	MD00G1080000_novel02	MD00G1080000_novel03,MD00G1080000_novel02
Chr00	MD00G1080000	-	A3	16032074-16031984	MD00G1080000_novel02	MD00G1080000_novel01,MD00G1080000_novel02
Chr00	MD00G1080000	-	A3	16032074-16032038	MD00G1080000_novel03	MD00G1080000_novel01,MD00G1080000_novel03
Chr00	MD00G1080100	+	A3	16037894-16037911	MD00G1080100_novel03	MD00G1080100_novel01,MD00G1080100_novel02,MD00G1080100_novel05,MD00G1080100_novel06,MD00G1080100_novel13,MD00G1080100_novel07,MD00G1080100_novel12,MD00G1080100_novel09,MD00G1080100_novel11,MD00G1080100_novel08,MD00G1080100_novel10,MD00G1080100_novel04,MD00G1080100_novel03
Chr00	MD00G1080100	+	A3	16038295-16038459	MD00G1080100_novel02	MD00G1080100,MD00G1080100_novel02
Chr00	MD00G1080100	+	A3	16038495-16038500	MD00G1080100_novel12,MD00G1080100_novel13,MD00G1080100_novel10,MD00G1080100_novel11,MD00G1080100_novel09,MD00G1080100_novel08,MD00G1080100_novel04,MD00G1080100_novel07,MD00G1080100_novel06,MD00G1080100_novel01	MD00G1080100_novel05,MD00G1080100_novel01,MD00G1080100_novel06,MD00G1080100_novel13,MD00G1080100_novel07,MD00G1080100_novel12,MD00G1080100_novel09,MD00G1080100_novel11,MD00G1080100_novel08,MD00G1080100_novel10,MD00G1080100_novel04
Chr00	MD00G1080100	+	A3	16039993-16040116	MD00G1080100	MD00G1080100_novel01,MD00G1080100_novel02,MD00G1080100_novel07,MD00G1080100_novel08,MD00G1080100
Chr00	MD00G1080100	+	A3	16040736-16040776	MD00G1080100_novel13	MD00G1080100_novel01,MD00G1080100_novel02,MD00G1080100_novel03,MD00G1080100_novel05,MD00G1080100_novel06,MD00G1080100_novel07,MD00G1080100_novel12,MD00G1080100_novel09,MD00G1080100_novel11,MD00G1080100_novel08,MD00G1080100_novel04,MD00G1080100,MD00G1080100_novel13
Chr00	MD00G1080400	-	A3	16050759-16050754	MD00G1080400_novel22,MD00G1080400_novel14,MD00G1080400_novel13,MD00G1080400_novel01,MD00G1080400_novel02,MD00G1080400_novel10,MD00G1080400_novel08,MD00G1080400_novel09,MD00G1080400_novel19,MD00G1080400_novel04,MD00G1080400,MD00G1080400_novel11	MD00G1080400_novel05,MD00G1080400_novel09,MD00G1080400_novel19,MD00G1080400_novel22,MD00G1080400_novel13,MD00G1080400_novel04,MD00G1080400,MD00G1080400_novel10,MD00G1080400_novel01,MD00G1080400_novel08,MD00G1080400_novel14,MD00G1080400_novel02,MD00G1080400_novel11
Chr00	MD00G1080400	-	A3	16050766-16050754	MD00G1080400_novel22,MD00G1080400_novel04,MD00G1080400_novel13,MD00G1080400_novel01,MD00G1080400_novel02,MD00G1080400_novel10,MD00G1080400_novel08,MD00G1080400_novel09,MD00G1080400_novel19,MD00G1080400_novel11,MD00G1080400_novel14,MD00G1080400	MD00G1080400_novel07,MD00G1080400_novel09,MD00G1080400_novel19,MD00G1080400_novel22,MD00G1080400_novel13,MD00G1080400_novel04,MD00G1080400,MD00G1080400_novel10,MD00G1080400_novel01,MD00G1080400_novel08,MD00G1080400_novel14,MD00G1080400_novel02,MD00G1080400_novel11
Chr00	MD00G1080400	-	A3	16050766-16050759	MD00G1080400_novel05	MD00G1080400_novel07,MD00G1080400_novel05
Chr00	MD00G1080400	-	A3	16050767-16050754	MD00G1080400_novel22,MD00G1080400_novel04,MD00G1080400_novel14,MD00G1080400_novel13,MD00G1080400_novel01,MD00G1080400_novel02,MD00G1080400_novel10,MD00G1080400_novel08,MD00G1080400_novel09,MD00G1080400_novel19,MD00G1080400_novel11,MD00G1080400	MD00G1080400_novel03,MD00G1080400_novel06,MD00G1080400_novel09,MD00G1080400_novel19,MD00G1080400_novel22,MD00G1080400_novel13,MD00G1080400_novel04,MD00G1080400,MD00G1080400_novel10,MD00G1080400_novel01,MD00G1080400_novel08,MD00G1080400_novel14,MD00G1080400_novel02,MD00G1080400_novel11
Chr00	MD00G1080400	-	A3	16050767-16050759	MD00G1080400_novel05	MD00G1080400_novel03,MD00G1080400_novel06,MD00G1080400_novel05
Chr00	MD00G1080400	-	A3	16050767-16050766	MD00G1080400_novel07	MD00G1080400_novel03,MD00G1080400_novel06,MD00G1080400_novel07
Chr00	MD00G1080400	-	A3	16052020-16052014	MD00G1080400	MD00G1080400_novel09,MD00G1080400_novel15,MD00G1080400_novel19,MD00G1080400_novel12,MD00G1080400_novel22,MD00G1080400_novel13,MD00G1080400_novel03,MD00G1080400_novel04,MD00G1080400_novel05,MD00G1080400_novel17,MD00G1080400_novel18,MD00G1080400_novel10,MD00G1080400_novel07,MD00G1080400_novel01,MD00G1080400_novel08,MD00G1080400_novel14,MD00G1080400_novel06,MD00G1080400_novel20,MD00G1080400_novel02,…
Chr00	MD00G1080400	-	A3	16053288-16053281	MD00G1080400_novel14	MD00G1080400_novel13,MD00G1080400_novel14
Chr00	MD00G1080400	-	A3	16053815-16053288	MD00G1080400_novel08	MD00G1080400_novel15,MD00G1080400_novel12,MD00G1080400_novel03,MD00G1080400_novel05,MD00G1080400,MD00G1080400_novel06,MD00G1080400_novel20,MD00G1080400_novel08
Chr00	MD00G1080400	-	A3	16054302-16053288	MD00G1080400_novel08	MD00G1080400_novel22,MD00G1080400_novel04,MD00G1080400_novel01,MD00G1080400_novel08
Chr00	MD00G1080400	-	A3	16054302-16053815	MD00G1080400_novel15,MD00G1080400_novel07,MD00G1080400_novel13,MD00G1080400_novel02,MD00G1080400_novel03,MD00G1080400_novel05,MD00G1080400_novel20,MD00G1080400_novel18,MD00G1080400_novel14,MD00G1080400,MD00G1080400_novel16,MD00G1080400_novel12,MD00G1080400_novel06,MD00G1080400_novel17	MD00G1080400_novel22,MD00G1080400_novel04,MD00G1080400_novel01,MD00G1080400_novel15,MD00G1080400_novel12,MD00G1080400_novel13,MD00G1080400_novel03,MD00G1080400_novel05,MD00G1080400_novel17,MD00G1080400,MD00G1080400_novel18,MD00G1080400_novel07,MD00G1080400_novel14,MD00G1080400_novel06,MD00G1080400_novel20,MD00G1080400_novel02,MD00G1080400_novel16
Chr00	MD00G1080400	-	A3	16055019-16054681	MD00G1080400_novel17,MD00G1080400_novel04,MD00G1080400_novel15,MD00G1080400_novel14,MD00G1080400_novel13,MD00G1080400_novel12,MD00G1080400_novel10,MD00G1080400_novel05,MD00G1080400_novel20,MD00G1080400_novel19,MD00G1080400_novel18,MD00G1080400_novel22,MD00G1080400_novel21,MD00G1080400,MD00G1080400_novel16,MD00G1080400_novel01,MD00G1080400_novel02,MD00G1080400_novel06,MD00G1080400_novel03,MD00G108…	MD00G1080400_novel08,MD00G1080400_novel11,MD00G1080400_novel09,MD00G1080400_novel15,MD00G1080400_novel19,MD00G1080400_novel12,MD00G1080400_novel22,MD00G1080400_novel13,MD00G1080400_novel03,MD00G1080400_novel04,MD00G1080400_novel05,MD00G1080400_novel17,MD00G1080400,MD00G1080400_novel18,MD00G1080400_novel10,MD00G1080400_novel07,MD00G1080400_novel01,MD00G1080400_novel14,MD00G1080400_novel06,MD00G108…
Chr00	MD00G1080400	-	A3	16055870-16055850	MD00G1080400_novel17,MD00G1080400_novel04,MD00G1080400_novel15,MD00G1080400_novel14,MD00G1080400_novel13,MD00G1080400_novel12,MD00G1080400_novel11,MD00G1080400_novel05,MD00G1080400_novel08,MD00G1080400_novel06,MD00G1080400_novel19,MD00G1080400_novel18,MD00G1080400_novel22,MD00G1080400_novel21,MD00G1080400,MD00G1080400_novel16,MD00G1080400_novel01,MD00G1080400_novel02,MD00G1080400_novel03,MD00G108…	MD00G1080400_novel10,MD00G1080400_novel09,MD00G1080400_novel15,MD00G1080400_novel19,MD00G1080400_novel12,MD00G1080400_novel22,MD00G1080400_novel13,MD00G1080400_novel03,MD00G1080400_novel04,MD00G1080400_novel05,MD00G1080400_novel17,MD00G1080400,MD00G1080400_novel18,MD00G1080400_novel07,MD00G1080400_novel01,MD00G1080400_novel08,MD00G1080400_novel14,MD00G1080400_novel06,MD00G1080400_novel02,MD00G108…
Chr00	MD00G1080400	-	A3	16056099-16056090	MD00G1080400_novel17,MD00G1080400_novel04,MD00G1080400_novel15,MD00G1080400_novel14,MD00G1080400_novel12,MD00G1080400_novel11,MD00G1080400_novel10,MD00G1080400_novel05,MD00G1080400_novel08,MD00G1080400_novel06,MD00G1080400_novel19,MD00G1080400_novel18,MD00G1080400_novel22,MD00G1080400_novel21,MD00G1080400,MD00G1080400_novel16,MD00G1080400_novel02,MD00G1080400_novel03,MD00G1080400_novel09,MD00G108…	MD00G1080400_novel13,MD00G1080400_novel01,MD00G1080400_novel09,MD00G1080400_novel15,MD00G1080400_novel19,MD00G1080400_novel12,MD00G1080400_novel22,MD00G1080400_novel03,MD00G1080400_novel04,MD00G1080400_novel05,MD00G1080400_novel17,MD00G1080400,MD00G1080400_novel18,MD00G1080400_novel10,MD00G1080400_novel07,MD00G1080400_novel08,MD00G1080400_novel14,MD00G1080400_novel06,MD00G1080400_novel02,MD00G108…
Chr00	MD00G1080800	-	A3	16135909-16135265	MD00G1080800_novel02,MD00G1080800	MD00G1080800_novel01,MD00G1080800,MD00G1080800_novel02
Chr00	MD00G1087000	+	A3	17760482-17760486	MD00G1087000_novel03	MD00G1087000,MD00G1087000_novel01,MD00G1087000_novel02,MD00G1087000_novel04,MD00G1087000_novel03
Chr00	MD00G1087000	+	A3	17760944-17760960	MD00G1087000_novel02	MD00G1087000,MD00G1087000_novel01,MD00G1087000_novel03,MD00G1087000_novel02
Chr00	MD00G1087000	+	A3	17762574-17762712	MD00G1087000_novel01,MD00G1087000_novel03	MD00G1087000,MD00G1087000_novel02,MD00G1087000_novel04,MD00G1087000_novel01,MD00G1087000_novel03
Chr00	MD00G1087100	+	A3	17764775-17764868	MD00G1087100_novel01	MD00G1087100_novel02,MD00G1087100_novel01
Chr00	MD00G1087100	+	A3	17765963-17765986	MD00G1087100_novel01	MD00G1087100,MD00G1087100_novel01
Chr00	MD00G1087100	+	A3	17766691-17766744	MD00G1087100	MD00G1087100_novel01,MD00G1087100_novel02,MD00G1087100
Chr00	MD00G1087700	-	A3	17808493-17808482	MD00G1087700_novel04	MD00G1087700_novel05,MD00G1087700,MD00G1087700_novel03,MD00G1087700_novel01,MD00G1087700_novel04
Chr00	MD00G1088600	-	A3	18116141-18116128	MD00G1088600_novel02	MD00G1088600_novel06,MD00G1088600,MD00G1088600_novel04,MD00G1088600_novel01,MD00G1088600_novel03,MD00G1088600_novel02
Chr00	MD00G1088600	-	A3	18120550-18120545	MD00G1088600_novel01	MD00G1088600_novel02,MD00G1088600_novel01
Chr00	MD00G1088600	-	A3	18120716-18120545	MD00G1088600_novel01	MD00G1088600,MD00G1088600_novel04,MD00G1088600_novel03,MD00G1088600_novel01
Chr00	MD00G1088600	-	A3	18120716-18120550	MD00G1088600_novel02	MD00G1088600,MD00G1088600_novel04,MD00G1088600_novel03,MD00G1088600_novel02
Chr00	MD00G1089600	-	A3	18498577-18498557	MD00G1089600_novel02	MD00G1089600,MD00G1089600_novel02
Chr00	MD00G1092600	-	A3	19547015-19546863	MD00G1092600	MD00G1092600_novel01,MD00G1092600
Chr00	MD00G1095800	-	A3	19938156-19938136	MD00G1095800	MD00G1095800_novel01,MD00G1095800
Chr00	MD00G1098400	-	A3	20508906-20508903	MD00G1098400_novel02,MD00G1098400_novel03	MD00G1098400_novel01,MD00G1098400,MD00G1098400_novel04,MD00G1098400_novel03,MD00G1098400_novel02
Chr00	MD00G1098500	+	A3	20518367-20518370	MD00G1098500	MD00G1098500_novel01,MD00G1098500_novel03,MD00G1098500_novel04,MD00G1098500_novel06,MD00G1098500_novel02,MD00G1098500_novel08,MD00G1098500
Chr00	MD00G1099400	-	A3	20799981-20799979	MD00G1099400	MD00G1099400_novel01,MD00G1099400
Chr00	MD00G1100600	-	A3	21328760-21328753	MD00G1100600_novel01,MD00G1100600_novel03	MD00G1100600,MD00G1100600_novel04,MD00G1100600_novel02,MD00G1100600_novel03,MD00G1100600_novel01
Chr00	MD00G1101700	-	A3	21512928-21512760	MD00G1101700_novel01	MD00G1101700,MD00G1101700_novel02,MD00G1101700_novel01
Chr00	MD00G1101700	-	A3	21513718-21513715	MD00G1101700,MD00G1101700_novel01	MD00G1101700_novel02,MD00G1101700_novel01,MD00G1101700
Chr00	MD00G1104200	+	A3	21899923-21899932	MD00G1104200_novel01,MD00G1104200_novel05,MD00G1104200	MD00G1104200_novel02,MD00G1104200_novel03,MD00G1104200_novel04,MD00G1104200_novel01,MD00G1104200,MD00G1104200_novel05
Chr00	MD00G1106500	+	A3	22371891-22371893	MD00G1106500	MD00G1106500_novel02,MD00G1106500_novel03,MD00G1106500_novel05,MD00G1106500
Chr00	MD00G1107300	-	A3	22471120-22471053	MD00G1107300	MD00G1107300_novel01,MD00G1107300
Chr00	MD00G1107600	+	A3	22528949-22528952	MD00G1107600	MD00G1107600_novel01,MD00G1107600_novel02,MD00G1107600
Chr00	MD00G1107600	+	A3	22530144-22530176	MD00G1107600_novel02	MD00G1107600,MD00G1107600_novel01,MD00G1107600_novel02
Chr00	MD00G1108000	+	A3	22634596-22634600	MD00G1108000_novel05	MD00G1108000,MD00G1108000_novel01,MD00G1108000_novel02,MD00G1108000_novel03,MD00G1108000_novel04,MD00G1108000_novel05
Chr00	MD00G1108000	+	A3	22635193-22635221	MD00G1108000_novel08	MD00G1108000,MD00G1108000_novel01,MD00G1108000_novel02,MD00G1108000_novel03,MD00G1108000_novel04,MD00G1108000_novel05,MD00G1108000_novel06,MD00G1108000_novel07,MD00G1108000_novel08
Chr00	MD00G1109600	-	A3	22950954-22950887	MD00G1109600	MD00G1109600_novel01,MD00G1109600
Chr00	MD00G1110400	-	A3	23073417-23073236	MD00G1110400_novel08,MD00G1110400_novel03,MD00G1110400_novel01,MD00G1110400_novel07,MD00G1110400_novel04,MD00G1110400_novel05,MD00G1110400	MD00G1110400_novel02,MD00G1110400,MD00G1110400_novel07,MD00G1110400_novel01,MD00G1110400_novel04,MD00G1110400_novel08,MD00G1110400_novel05,MD00G1110400_novel03
Chr00	MD00G1110400	-	A3	23084143-23084132	MD00G1110400	MD00G1110400_novel06,MD00G1110400_novel01,MD00G1110400_novel04,MD00G1110400_novel02,MD00G1110400_novel05,MD00G1110400_novel03,MD00G1110400
Chr00	MD00G1110500	-	A3	23088329-23088326	MD00G1110500	MD00G1110500_novel01,MD00G1110500_novel03,MD00G1110500_novel02,MD00G1110500
Chr00	MD00G1110700	+	A3	23140158-23140542	MD00G1110700_novel01,MD00G1110700_novel03,MD00G1110700_novel02,MD00G1110700_novel07,MD00G1110700_novel06,MD00G1110700	MD00G1110700_novel05,MD00G1110700_novel01,MD00G1110700_novel02,MD00G1110700_novel03,MD00G1110700,MD00G1110700_novel06,MD00G1110700_novel07
Chr00	MD00G1110700	+	A3	23146060-23146120	MD00G1110700_novel01,MD00G1110700_novel07	MD00G1110700_novel02,MD00G1110700,MD00G1110700_novel05,MD00G1110700_novel01,MD00G1110700_novel07
Chr00	MD00G1111900	+	A3	23586970-23587248	MD00G1111900,MD00G1111900_novel02	MD00G1111900_novel03,MD00G1111900,MD00G1111900_novel02
Chr00	MD00G1112500	-	A3	23677501-23677493	MD00G1112500_novel06	MD00G1112500_novel01,MD00G1112500_novel06
Chr00	MD00G1113200	-	A3	23933226-23933204	MD00G1113200	MD00G1113200_novel01,MD00G1113200
Chr00	MD00G1114300	-	A3	24270663-24270569	MD00G1114300_novel01	MD00G1114300,MD00G1114300_novel01
Chr00	MD00G1114400	-	A3	24283397-24283381	MD00G1114400	MD00G1114400_novel01,MD00G1114400
Chr00	MD00G1116100	-	A3	24569231-24569218	MD00G1116100_novel02	MD00G1116100,MD00G1116100_novel01,MD00G1116100_novel02
Chr00	MD00G1120100	-	A3	25680988-25680886	MD00G1120100_novel01	MD00G1120100,MD00G1120100_novel01
Chr00	MD00G1123600	-	A3	26498284-26498262	MD00G1123600	MD00G1123600_novel01,MD00G1123600
Chr00	MD00G1125600	+	A3	26733402-26733446	MD00G1125600_novel04,MD00G1125600_novel05,MD00G1125600_novel01,MD00G1125600_novel02,MD00G1125600_novel03	MD00G1125600,MD00G1125600_novel01,MD00G1125600_novel02,MD00G1125600_novel03,MD00G1125600_novel04,MD00G1125600_novel05
Chr00	MD00G1126900	-	A3	26934770-26934757	MD00G1126900_novel01	MD00G1126900,MD00G1126900_novel02,MD00G1126900_novel04,MD00G1126900_novel03,MD00G1126900_novel01
Chr00	MD00G1127300	-	A3	26965873-26965854	MD00G1127300_novel03,MD00G1127300_novel02,MD00G1127300_novel01,MD00G1127300,MD00G1127300_novel04	MD00G1127300_novel05,MD00G1127300_novel02,MD00G1127300_novel01,MD00G1127300,MD00G1127300_novel03,MD00G1127300_novel04
Chr00	MD00G1127300	-	A3	26970673-26970669	MD00G1127300_novel03,MD00G1127300_novel01,MD00G1127300,MD00G1127300_novel05,MD00G1127300_novel04	MD00G1127300_novel02,MD00G1127300_novel01,MD00G1127300,MD00G1127300_novel03,MD00G1127300_novel05,MD00G1127300_novel04
Chr00	MD00G1127500	-	A3	27030984-27030949	MD00G1127500,MD00G1127500_novel02,MD00G1127500_novel04,MD00G1127500_novel06	MD00G1127500_novel05,MD00G1127500_novel02,MD00G1127500,MD00G1127500_novel04,MD00G1127500_novel06
Chr00	MD00G1127500	-	A3	27040060-27040051	MD00G1127500_novel02	MD00G1127500,MD00G1127500_novel01,MD00G1127500_novel02
Chr00	MD00G1128200	+	A3	27239088-27239151	MD00G1128200_novel03,MD00G1128200	MD00G1128200_novel02,MD00G1128200,MD00G1128200_novel03
Chr00	MD00G1129200	-	A3	27492978-27492968	MD00G1129200_novel08,MD00G1129200_novel04,MD00G1129200_novel06,MD00G1129200_novel02	MD00G1129200_novel05,MD00G1129200,MD00G1129200_novel07,MD00G1129200_novel06,MD00G1129200_novel04,MD00G1129200_novel08,MD00G1129200_novel02
Chr00	MD00G1129500	-	A3	27804476-27804454	MD00G1129500_novel01	MD00G1129500,MD00G1129500_novel01
Chr00	MD00G1131600	+	A3	28267671-28267706	MD00G1131600_novel01	MD00G1131600_novel03,MD00G1131600_novel02,MD00G1131600_novel05,MD00G1131600,MD00G1131600_novel06,MD00G1131600_novel01
Chr00	MD00G1136600	-	A3	29615005-29614972	MD00G1136600_novel01	MD00G1136600,MD00G1136600_novel01
Chr00	MD00G1137500	+	A3	29816643-29816659	MD00G1137500_novel04	MD00G1137500_novel05,MD00G1137500_novel04
Chr00	MD00G1137500	+	A3	29816643-29817191	MD00G1137500_novel03	MD00G1137500_novel05,MD00G1137500_novel03
Chr00	MD00G1139900	-	A3	30506012-30506003	MD00G1139900_novel01	MD00G1139900,MD00G1139900_novel01
Chr00	MD00G1142500	-	A3	31006421-31006389	MD00G1142500_novel01	MD00G1142500,MD00G1142500_novel01
Chr00	MD00G1145000	-	A3	31722395-31722386	MD00G1145000_novel01	MD00G1145000,MD00G1145000_novel01
Chr00	MD00G1146800	-	A3	32126081-32126071	MD00G1146800,MD00G1146800_novel01,MD00G1146800_novel05,MD00G1146800_novel04	MD00G1146800_novel03,MD00G1146800_novel02,MD00G1146800_novel04,MD00G1146800_novel05,MD00G1146800_novel01,MD00G1146800
Chr00	MD00G1148100	+	A3	32474598-32474643	MD00G1148100_novel02,MD00G1148100_novel01,MD00G1148100_novel04,MD00G1148100	MD00G1148100_novel03,MD00G1148100_novel01,MD00G1148100,MD00G1148100_novel02,MD00G1148100_novel04
Chr00	MD00G1148100	+	A3	32476085-32476118	MD00G1148100_novel02	MD00G1148100_novel01,MD00G1148100,MD00G1148100_novel03,MD00G1148100_novel04,MD00G1148100_novel02
Chr00	MD00G1148300	+	A3	32535597-32535604	MD00G1148300_novel04,MD00G1148300_novel05,MD00G1148300,MD00G1148300_novel03	MD00G1148300_novel02,MD00G1148300_novel03,MD00G1148300,MD00G1148300_novel05,MD00G1148300_novel04
Chr00	MD00G1152700	-	A3	33435008-33434954	MD00G1152700_novel02,MD00G1152700_novel01,MD00G1152700,MD00G1152700_novel04	MD00G1152700_novel03,MD00G1152700_novel01,MD00G1152700,MD00G1152700_novel02,MD00G1152700_novel04
Chr00	MD00G1156000	+	A3	34406109-34406169	MD00G1156000_novel01,MD00G1156000_novel05,MD00G1156000_novel06	MD00G1156000_novel07,MD00G1156000_novel01,MD00G1156000_novel05,MD00G1156000_novel06
Chr00	MD00G1157300	+	A3	34800913-34800935	MD00G1157300_novel01	MD00G1157300,MD00G1157300_novel01
Chr00	MD00G1159300	-	A3	35186261-35186209	MD00G1159300_novel01	MD00G1159300,MD00G1159300_novel01
Chr00	MD00G1159400	-	A3	35241908-35241905	MD00G1159400	MD00G1159400_novel07,MD00G1159400_novel03,MD00G1159400_novel06,MD00G1159400_novel04,MD00G1159400_novel10,MD00G1159400_novel05,MD00G1159400_novel02,MD00G1159400_novel11,MD00G1159400_novel08,MD00G1159400_novel01,MD00G1159400
Chr00	MD00G1159400	-	A3	35250838-35250798	MD00G1159400_novel02,MD00G1159400_novel05	MD00G1159400_novel07,MD00G1159400,MD00G1159400_novel06,MD00G1159400_novel04,MD00G1159400_novel10,MD00G1159400_novel01,MD00G1159400_novel05,MD00G1159400_novel02
Chr00	MD00G1159400	-	A3	35251853-35251844	MD00G1159400_novel05	MD00G1159400_novel10,MD00G1159400_novel05
Chr00	MD00G1159400	-	A3	35251867-35250838	MD00G1159400_novel03	MD00G1159400_novel08,MD00G1159400_novel03
Chr00	MD00G1159400	-	A3	35251867-35251844	MD00G1159400_novel05	MD00G1159400_novel07,MD00G1159400,MD00G1159400_novel06,MD00G1159400_novel04,MD00G1159400_novel02,MD00G1159400_novel08,MD00G1159400_novel01,MD00G1159400_novel05
Chr00	MD00G1159400	-	A3	35251867-35251853	MD00G1159400_novel10	MD00G1159400_novel07,MD00G1159400,MD00G1159400_novel06,MD00G1159400_novel04,MD00G1159400_novel02,MD00G1159400_novel08,MD00G1159400_novel01,MD00G1159400_novel10
Chr00	MD00G1159500	-	A3	35258040-35257347	MD00G1159500	MD00G1159500_novel02,MD00G1159500
Chr00	MD00G1161300	+	A3	35863823-35863843	MD00G1161300	MD00G1161300_novel01,MD00G1161300_novel03,MD00G1161300
Chr00	MD00G1163000	+	A3	36644238-36646111	MD00G1163000	MD00G1163000_novel01,MD00G1163000
Chr00	MD00G1163700	-	A3	36870514-36870509	MD00G1163700_novel03,MD00G1163700_novel02	MD00G1163700_novel05,MD00G1163700_novel06,MD00G1163700_novel08,MD00G1163700_novel02,MD00G1163700_novel03
Chr00	MD00G1163700	-	A3	36877349-36877309	MD00G1163700_novel06,MD00G1163700_novel05,MD00G1163700_novel01	MD00G1163700_novel04,MD00G1163700_novel05,MD00G1163700_novel06,MD00G1163700_novel01
Chr00	MD00G1163700	-	A3	36877648-36877645	MD00G1163700_novel07,MD00G1163700_novel04	MD00G1163700_novel05,MD00G1163700_novel01,MD00G1163700_novel04,MD00G1163700_novel07
Chr00	MD00G1163700	-	A3	36882971-36882948	MD00G1163700_novel07,MD00G1163700_novel06,MD00G1163700_novel04,MD00G1163700_novel03,MD00G1163700_novel02	MD00G1163700_novel05,MD00G1163700_novel04,MD00G1163700_novel02,MD00G1163700_novel03,MD00G1163700_novel06,MD00G1163700_novel07
Chr00	MD00G1164000	+	A3	37006159-37006475	MD00G1164000_novel03	MD00G1164000_novel04,MD00G1164000_novel03
Chr00	MD00G1164000	+	A3	37006159-37006564	MD00G1164000	MD00G1164000_novel04,MD00G1164000
Chr00	MD00G1164900	+	A3	37528210-37528249	MD00G1164900_novel01	MD00G1164900,MD00G1164900_novel01
Chr00	MD00G1171200	+	A3	39363446-39363456	MD00G1171200_novel03,MD00G1171200_novel07	MD00G1171200_novel01,MD00G1171200_novel02,MD00G1171200,MD00G1171200_novel04,MD00G1171200_novel06,MD00G1171200_novel03,MD00G1171200_novel07
Chr00	MD00G1171200	+	A3	39363446-39363573	MD00G1171200_novel05	MD00G1171200_novel01,MD00G1171200_novel02,MD00G1171200,MD00G1171200_novel04,MD00G1171200_novel06,MD00G1171200_novel05
Chr00	MD00G1171200	+	A3	39363456-39363573	MD00G1171200_novel05	MD00G1171200_novel03,MD00G1171200_novel07,MD00G1171200_novel05
Chr00	MD00G1171200	+	A3	39366875-39366890	MD00G1171200_novel05	MD00G1171200_novel01,MD00G1171200_novel02,MD00G1171200_novel03,MD00G1171200,MD00G1171200_novel04,MD00G1171200_novel06,MD00G1171200_novel07,MD00G1171200_novel05
Chr00	MD00G1171800	-	A3	39484793-39484727	MD00G1171800_novel01	MD00G1171800_novel05,MD00G1171800,MD00G1171800_novel01
Chr00	MD00G1173600	-	A3	40243355-40243351	MD00G1173600	MD00G1173600_novel01,MD00G1173600_novel02,MD00G1173600
Chr00	MD00G1175500	-	A3	40672470-40672468	MD00G1175500	MD00G1175500_novel01,MD00G1175500_novel03,MD00G1175500_novel02,MD00G1175500
Chr00	MD00G1177300	-	A3	41231668-41231659	MD00G1177300,MD00G1177300_novel01,MD00G1177300_novel03	MD00G1177300_novel02,MD00G1177300,MD00G1177300_novel03,MD00G1177300_novel01
Chr00	MD00G1177400	+	A3	41236755-41236773	MD00G1177400_novel04,MD00G1177400_novel02	MD00G1177400_novel01,MD00G1177400_novel03,MD00G1177400_novel05,MD00G1177400_novel02,MD00G1177400_novel04
Chr00	MD00G1179300	-	A3	42093563-42093531	MD00G1179300_novel01	MD00G1179300,MD00G1179300_novel01
Chr00	MD00G1183400	-	A3	43334141-43333659	MD00G1183400,MD00G1183400_novel04,MD00G1183400_novel05	MD00G1183400_novel01,MD00G1183400,MD00G1183400_novel04,MD00G1183400_novel05
Chr00	MD00G1184300	+	A3	43455266-43455292	MD00G1184300_novel03,MD00G1184300,MD00G1184300_novel04,MD00G1184300_novel05,MD00G1184300_novel06,MD00G1184300_novel07,MD00G1184300_novel01,MD00G1184300_novel02,MD00G1184300_novel10,MD00G1184300_novel08,MD00G1184300_novel12	MD00G1184300_novel09,MD00G1184300,MD00G1184300_novel01,MD00G1184300_novel03,MD00G1184300_novel05,MD00G1184300_novel04,MD00G1184300_novel02,MD00G1184300_novel07,MD00G1184300_novel06,MD00G1184300_novel08,MD00G1184300_novel10,MD00G1184300_novel12
Chr00	MD00G1186900	-	A3	44333790-44333786	MD00G1186900_novel01	MD00G1186900,MD00G1186900_novel01
Chr00	MD00G1187500	+	A3	44446897-44446910	MD00G1187500	MD00G1187500_novel01,MD00G1187500_novel02,MD00G1187500
Chr00	MD00G1192400	+	A3	46606688-46606755	MD00G1192400	MD00G1192400_novel01,MD00G1192400
Chr00	MD00G1201000	-	A3	47555058-47555041	MD00G1201000	MD00G1201000_novel01,MD00G1201000
Chr00	MD00G1201700	-	A3	47871364-47871339	MD00G1201700	MD00G1201700_novel01,MD00G1201700
Chr00	MD00G1203800	+	A3	49031797-49031807	MD00G1203800	MD00G1203800_novel01,MD00G1203800
Chr00	MD00G1204700	+	A3	49612865-49612870	MD00G1204700_novel02	MD00G1204700,MD00G1204700_novel03,MD00G1204700_novel05,MD00G1204700_novel04,MD00G1204700_novel06,MD00G1204700_novel07,MD00G1204700_novel08,MD00G1204700_novel09,MD00G1204700_novel10,MD00G1204700_novel02
Chr00	MD00G1204700	+	A3	49613310-49613316	MD00G1204700_novel04,MD00G1204700_novel09,MD00G1204700_novel08,MD00G1204700_novel10	MD00G1204700_novel02,MD00G1204700,MD00G1204700_novel03,MD00G1204700_novel05,MD00G1204700_novel06,MD00G1204700_novel07,MD00G1204700_novel04,MD00G1204700_novel08,MD00G1204700_novel09,MD00G1204700_novel10
Chr00	MD00G1204700	+	A3	49614535-49614552	MD00G1204700_novel05,MD00G1204700_novel04,MD00G1204700_novel07,MD00G1204700_novel06,MD00G1204700_novel02,MD00G1204700_novel09,MD00G1204700_novel08,MD00G1204700_novel10,MD00G1204700	MD00G1204700_novel03,MD00G1204700_novel02,MD00G1204700,MD00G1204700_novel05,MD00G1204700_novel04,MD00G1204700_novel06,MD00G1204700_novel07,MD00G1204700_novel08,MD00G1204700_novel09,MD00G1204700_novel10
Chr00	MD00G1204700	+	A3	49615032-49615047	MD00G1204700_novel05,MD00G1204700_novel07,MD00G1204700_novel06,MD00G1204700_novel03,MD00G1204700_novel02,MD00G1204700_novel09,MD00G1204700_novel08,MD00G1204700_novel10,MD00G1204700	MD00G1204700_novel04,MD00G1204700_novel02,MD00G1204700,MD00G1204700_novel03,MD00G1204700_novel05,MD00G1204700_novel06,MD00G1204700_novel07,MD00G1204700_novel08,MD00G1204700_novel09,MD00G1204700_novel10
Chr00	MD00G1208600	-	A3	50805347-50805339	MD00G1208600	MD00G1208600_novel05,MD00G1208600_novel09,MD00G1208600_novel14,MD00G1208600_novel07,MD00G1208600_novel13,MD00G1208600_novel03,MD00G1208600_novel02,MD00G1208600_novel12,MD00G1208600_novel06,MD00G1208600_novel10,MD00G1208600_novel11,MD00G1208600_novel08,MD00G1208600_novel01,MD00G1208600_novel04,MD00G1208600
Chr00	MD00G1208600	-	A3	50805510-50805493	MD00G1208600,MD00G1208600_novel08,MD00G1208600_novel09,MD00G1208600_novel05,MD00G1208600_novel07,MD00G1208600_novel01,MD00G1208600_novel11,MD00G1208600_novel03	MD00G1208600_novel14,MD00G1208600_novel02,MD00G1208600_novel12,MD00G1208600_novel06,MD00G1208600_novel10,MD00G1208600_novel04,MD00G1208600,MD00G1208600_novel05,MD00G1208600_novel09,MD00G1208600_novel07,MD00G1208600_novel03,MD00G1208600_novel11,MD00G1208600_novel08,MD00G1208600_novel01
Chr00	MD00G1208600	-	A3	50805911-50805748	MD00G1208600	MD00G1208600_novel09,MD00G1208600
Chr00	MD00G1208600	-	A3	50806728-50806674	MD00G1208600_novel12,MD00G1208600_novel03,MD00G1208600_novel02,MD00G1208600_novel08,MD00G1208600_novel09,MD00G1208600_novel04,MD00G1208600_novel05,MD00G1208600_novel06,MD00G1208600_novel14,MD00G1208600_novel13,MD00G1208600_novel01,MD00G1208600_novel11,MD00G1208600_novel10	MD00G1208600,MD00G1208600_novel05,MD00G1208600_novel09,MD00G1208600_novel14,MD00G1208600_novel13,MD00G1208600_novel03,MD00G1208600_novel02,MD00G1208600_novel12,MD00G1208600_novel06,MD00G1208600_novel10,MD00G1208600_novel11,MD00G1208600_novel08,MD00G1208600_novel01,MD00G1208600_novel04
Chr01	MD01G1001200	+	A3	381013-381016	MD01G1001200	MD01G1001200_novel01,MD01G1001200
Chr01	MD01G1004200	+	A3	1354403-1354451	MD01G1004200_novel03	MD01G1004200,MD01G1004200_novel01,MD01G1004200_novel02,MD01G1004200_novel04,MD01G1004200_novel05,MD01G1004200_novel03
Chr01	MD01G1005600	-	A3	2055059-2055000	MD01G1005600_novel08,MD01G1005600_novel04,MD01G1005600_novel06,MD01G1005600_novel01,MD01G1005600_novel02,MD01G1005600	MD01G1005600_novel05,MD01G1005600_novel07,MD01G1005600_novel03,MD01G1005600,MD01G1005600_novel02,MD01G1005600_novel06,MD01G1005600_novel04,MD01G1005600_novel08,MD01G1005600_novel01
Chr01	MD01G1015800	-	A3	7248346-7248236	MD01G1015800_novel07,MD01G1015800_novel05,MD01G1015800_novel04,MD01G1015800_novel03,MD01G1015800_novel08	MD01G1015800_novel01,MD01G1015800_novel02,MD01G1015800,MD01G1015800_novel06,MD01G1015800_novel07,MD01G1015800_novel03,MD01G1015800_novel08,MD01G1015800_novel04,MD01G1015800_novel05
Chr01	MD01G1017400	-	A3	7731715-7731691	MD01G1017400_novel01,MD01G1017400_novel03,MD01G1017400_novel02,MD01G1017400_novel07,MD01G1017400	MD01G1017400_novel08,MD01G1017400,MD01G1017400_novel01,MD01G1017400_novel03,MD01G1017400_novel07,MD01G1017400_novel02
Chr01	MD01G1017900	+	A3	7795231-7795239	MD01G1017900_novel09	MD01G1017900_novel02,MD01G1017900_novel04,MD01G1017900_novel05,MD01G1017900_novel03,MD01G1017900_novel07,MD01G1017900_novel08,MD01G1017900_novel10,MD01G1017900_novel09
Chr01	MD01G1021600	-	A3	8528770-8528767	MD01G1021600_novel02	MD01G1021600,MD01G1021600_novel01,MD01G1021600_novel02
Chr01	MD01G1021600	-	A3	8529887-8529884	MD01G1021600	MD01G1021600_novel01,MD01G1021600
Chr01	MD01G1024000	+	A3	9109984-9110120	MD01G1024000_novel03	MD01G1024000_novel01,MD01G1024000_novel03
Chr01	MD01G1024400	+	A3	9241776-9241786	MD01G1024400_novel02,MD01G1024400_novel07,MD01G1024400_novel06	MD01G1024400,MD01G1024400_novel04,MD01G1024400_novel01,MD01G1024400_novel06,MD01G1024400_novel07,MD01G1024400_novel02
Chr01	MD01G1024900	-	A3	9338340-9338337	MD01G1024900_novel03,MD01G1024900_novel06	MD01G1024900_novel05,MD01G1024900,MD01G1024900_novel01,MD01G1024900_novel02,MD01G1024900_novel03,MD01G1024900_novel06
Chr01	MD01G1028300	+	A3	10500935-10500961	MD01G1028300_novel01	MD01G1028300,MD01G1028300_novel03,MD01G1028300_novel01
Chr01	MD01G1032200	-	A3	11273584-11273546	MD01G1032200_novel04,MD01G1032200,MD01G1032200_novel01	MD01G1032200_novel08,MD01G1032200_novel07,MD01G1032200,MD01G1032200_novel01,MD01G1032200_novel04
Chr01	MD01G1032200	-	A3	11273708-11273546	MD01G1032200_novel04,MD01G1032200,MD01G1032200_novel01	MD01G1032200_novel02,MD01G1032200_novel05,MD01G1032200,MD01G1032200_novel01,MD01G1032200_novel04
Chr01	MD01G1032200	-	A3	11273708-11273584	MD01G1032200_novel07,MD01G1032200_novel08	MD01G1032200_novel02,MD01G1032200_novel05,MD01G1032200_novel08,MD01G1032200_novel07
Chr01	MD01G1032800	+	A3	11388203-11388207	MD01G1032800_novel05,MD01G1032800_novel06	MD01G1032800_novel01,MD01G1032800_novel03,MD01G1032800_novel07,MD01G1032800_novel04,MD01G1032800_novel02,MD01G1032800,MD01G1032800_novel08,MD01G1032800_novel06,MD01G1032800_novel05
Chr01	MD01G1033400	+	A3	11578433-11578470	MD01G1033400_novel01	MD01G1033400,MD01G1033400_novel01
Chr01	MD01G1033500	-	A3	11585510-11585473	MD01G1033500,MD01G1033500_novel01	MD01G1033500_novel02,MD01G1033500,MD01G1033500_novel01
Chr01	MD01G1035600	+	A3	12012155-12012177	MD01G1035600_novel02,MD01G1035600_novel01	MD01G1035600,MD01G1035600_novel03,MD01G1035600_novel04,MD01G1035600_novel01,MD01G1035600_novel02
Chr01	MD01G1035600	+	A3	12017641-12017736	MD01G1035600_novel02	MD01G1035600,MD01G1035600_novel01,MD01G1035600_novel03,MD01G1035600_novel04,MD01G1035600_novel05,MD01G1035600_novel02
Chr01	MD01G1036200	-	A3	12169678-12169671	MD01G1036200,MD01G1036200_novel03	MD01G1036200_novel08,MD01G1036200,MD01G1036200_novel03
Chr01	MD01G1037400	+	A3	13003601-13003637	MD01G1037400_novel02	MD01G1037400,MD01G1037400_novel01,MD01G1037400_novel02
Chr01	MD01G1038200	+	A3	13143730-13143762	MD01G1038200_novel01	MD01G1038200,MD01G1038200_novel01
Chr01	MD01G1038200	+	A3	13144247-13144284	MD01G1038200_novel01	MD01G1038200,MD01G1038200_novel01
Chr01	MD01G1038600	+	A3	13407712-13407716	MD01G1038600_novel02	MD01G1038600,MD01G1038600_novel01,MD01G1038600_novel03,MD01G1038600_novel02
Chr01	MD01G1042400	+	A3	14057670-14057676	MD01G1042400_novel01	MD01G1042400,MD01G1042400_novel01
Chr01	MD01G1046500	+	A3	14761864-14761906	MD01G1046500_novel07,MD01G1046500_novel03	MD01G1046500_novel01,MD01G1046500_novel02,MD01G1046500_novel04,MD01G1046500_novel05,MD01G1046500,MD01G1046500_novel08,MD01G1046500_novel06,MD01G1046500_novel03,MD01G1046500_novel07
Chr01	MD01G1046600	+	A3	14777166-14777194	MD01G1046600_novel01,MD01G1046600	MD01G1046600_novel02,MD01G1046600_novel01,MD01G1046600
Chr01	MD01G1048600	+	A3	15165855-15165883	MD01G1048600_novel05	MD01G1048600_novel02,MD01G1048600,MD01G1048600_novel03,MD01G1048600_novel04,MD01G1048600_novel06,MD01G1048600_novel05
Chr01	MD01G1048600	+	A3	15166612-15166645	MD01G1048600_novel03,MD01G1048600,MD01G1048600_novel07,MD01G1048600_novel05	MD01G1048600_novel04,MD01G1048600,MD01G1048600_novel03,MD01G1048600_novel05,MD01G1048600_novel07
Chr01	MD01G1048700	+	A3	15172556-15173466	MD01G1048700	MD01G1048700_novel01,MD01G1048700
Chr01	MD01G1049200	-	A3	15196850-15196839	MD01G1049200_novel02,MD01G1049200_novel05	MD01G1049200,MD01G1049200_novel07,MD01G1049200_novel01,MD01G1049200_novel02,MD01G1049200_novel05
Chr01	MD01G1049200	-	A3	15198518-15198484	MD01G1049200_novel01	MD01G1049200_novel02,MD01G1049200_novel01
Chr01	MD01G1049500	-	A3	15232682-15231930	MD01G1049500_novel03	MD01G1049500_novel02,MD01G1049500_novel03
Chr01	MD01G1051200	-	A3	15480853-15480801	MD01G1051200_novel02	MD01G1051200,MD01G1051200_novel02
Chr01	MD01G1051200	-	A3	15481655-15480801	MD01G1051200_novel05	MD01G1051200_novel04,MD01G1051200_novel05
Chr01	MD01G1051200	-	A3	15481859-15480801	MD01G1051200_novel02	MD01G1051200_novel01,MD01G1051200_novel02
Chr01	MD01G1051200	-	A3	15481859-15480853	MD01G1051200	MD01G1051200_novel01,MD01G1051200
Chr01	MD01G1051300	-	A3	15498452-15498413	MD01G1051300	MD01G1051300_novel01,MD01G1051300
Chr01	MD01G1051400	-	A3	15535210-15535146	MD01G1051400_novel03	MD01G1051400,MD01G1051400_novel03
Chr01	MD01G1051400	-	A3	15535257-15535146	MD01G1051400_novel03	MD01G1051400_novel04,MD01G1051400_novel03
Chr01	MD01G1051400	-	A3	15535257-15535210	MD01G1051400	MD01G1051400_novel04,MD01G1051400
Chr01	MD01G1051400	-	A3	15535675-15535146	MD01G1051400_novel03	MD01G1051400_novel05,MD01G1051400_novel03
Chr01	MD01G1051400	-	A3	15535675-15535210	MD01G1051400	MD01G1051400_novel05,MD01G1051400
Chr01	MD01G1051400	-	A3	15535675-15535257	MD01G1051400_novel04	MD01G1051400_novel05,MD01G1051400_novel04
Chr01	MD01G1051700	+	A3	15591439-15591464	MD01G1051700_novel03	MD01G1051700_novel01,MD01G1051700_novel04,MD01G1051700,MD01G1051700_novel06,MD01G1051700_novel02,MD01G1051700_novel03
Chr01	MD01G1052400	+	A3	15718962-15718965	MD01G1052400_novel01	MD01G1052400,MD01G1052400_novel01
Chr01	MD01G1055100	+	A3	15966658-15966667	MD01G1055100_novel03	MD01G1055100_novel01,MD01G1055100_novel03
Chr01	MD01G1055700	+	A3	16092220-16092250	MD01G1055700_novel01,MD01G1055700_novel02	MD01G1055700,MD01G1055700_novel01,MD01G1055700_novel02
Chr01	MD01G1056200	-	A3	16140312-16140302	MD01G1056200_novel08	MD01G1056200_novel03,MD01G1056200_novel04,MD01G1056200,MD01G1056200_novel02,MD01G1056200_novel07,MD01G1056200_novel06,MD01G1056200_novel01,MD01G1056200_novel05,MD01G1056200_novel08
Chr01	MD01G1056200	-	A3	16140846-16140790	MD01G1056200_novel03	MD01G1056200_novel04,MD01G1056200,MD01G1056200_novel07,MD01G1056200_novel08,MD01G1056200_novel06,MD01G1056200_novel03
Chr01	MD01G1056200	-	A3	16143250-16143215	MD01G1056200_novel04	MD01G1056200,MD01G1056200_novel04
Chr01	MD01G1056200	-	A3	16143252-16143215	MD01G1056200_novel04	MD01G1056200_novel03,MD01G1056200_novel06,MD01G1056200_novel04
Chr01	MD01G1056200	-	A3	16143252-16143250	MD01G1056200	MD01G1056200_novel03,MD01G1056200_novel06,MD01G1056200
Chr01	MD01G1059300	-	A3	16306100-16306072	MD01G1059300	MD01G1059300_novel02,MD01G1059300_novel01,MD01G1059300
Chr01	MD01G1059300	-	A3	16308617-16308605	MD01G1059300	MD01G1059300_novel02,MD01G1059300_novel01,MD01G1059300
Chr01	MD01G1065900	-	A3	16977233-16977219	MD01G1065900_novel04	MD01G1065900_novel01,MD01G1065900,MD01G1065900_novel04
Chr01	MD01G1066000	-	A3	16985412-16985387	MD01G1066000_novel01,MD01G1066000_novel02	MD01G1066000,MD01G1066000_novel02,MD01G1066000_novel01
Chr01	MD01G1068200	-	A3	17214296-17214284	MD01G1068200	MD01G1068200_novel01,MD01G1068200
Chr01	MD01G1072900	-	A3	17806983-17806839	MD01G1072900	MD01G1072900_novel01,MD01G1072900
Chr01	MD01G1073400	+	A3	17885915-17885976	MD01G1073400_novel01	MD01G1073400,MD01G1073400_novel02,MD01G1073400_novel03,MD01G1073400_novel01
Chr01	MD01G1073600	+	A3	17914455-17914525	MD01G1073600_novel05,MD01G1073600_novel04,MD01G1073600_novel06,MD01G1073600_novel01,MD01G1073600_novel03	MD01G1073600,MD01G1073600_novel01,MD01G1073600_novel03,MD01G1073600_novel05,MD01G1073600_novel06,MD01G1073600_novel04
Chr01	MD01G1075800	+	A3	18176128-18176164	MD01G1075800	MD01G1075800_novel01,MD01G1075800
Chr01	MD01G1075800	+	A3	18176489-18176492	MD01G1075800_novel01	MD01G1075800,MD01G1075800_novel01
Chr01	MD01G1079500	+	A3	18679892-18679928	MD01G1079500_novel04,MD01G1079500_novel05	MD01G1079500,MD01G1079500_novel02,MD01G1079500_novel03,MD01G1079500_novel04,MD01G1079500_novel05
Chr01	MD01G1079500	+	A3	18679892-18679952	MD01G1079500_novel01	MD01G1079500,MD01G1079500_novel02,MD01G1079500_novel03,MD01G1079500_novel01
Chr01	MD01G1079500	+	A3	18679928-18679952	MD01G1079500_novel01	MD01G1079500_novel04,MD01G1079500_novel05,MD01G1079500_novel01
Chr01	MD01G1079500	+	A3	18681832-18681850	MD01G1079500	MD01G1079500_novel01,MD01G1079500_novel02,MD01G1079500
Chr01	MD01G1079500	+	A3	18681832-18681886	MD01G1079500_novel04,MD01G1079500_novel06,MD01G1079500_novel03	MD01G1079500_novel01,MD01G1079500_novel02,MD01G1079500_novel04,MD01G1079500_novel03,MD01G1079500_novel06
Chr01	MD01G1079500	+	A3	18681850-18681886	MD01G1079500_novel04,MD01G1079500_novel06,MD01G1079500_novel03	MD01G1079500,MD01G1079500_novel04,MD01G1079500_novel03,MD01G1079500_novel06
Chr01	MD01G1081300	-	A3	18825648-18825629	MD01G1081300_novel03	MD01G1081300_novel02,MD01G1081300,MD01G1081300_novel01,MD01G1081300_novel03
Chr01	MD01G1082300	-	A3	18881047-18880924	MD01G1082300_novel03	MD01G1082300,MD01G1082300_novel03
Chr01	MD01G1086500	-	A3	19499070-19499058	MD01G1086500_novel01	MD01G1086500_novel04,MD01G1086500_novel01
Chr01	MD01G1086500	-	A3	19502078-19502058	MD01G1086500_novel01	MD01G1086500,MD01G1086500_novel04,MD01G1086500_novel03,MD01G1086500_novel02,MD01G1086500_novel01
Chr01	MD01G1087600	-	A3	19699038-19699032	MD01G1087600	MD01G1087600_novel01,MD01G1087600_novel03,MD01G1087600_novel02,MD01G1087600
Chr01	MD01G1087600	-	A3	19700840-19700782	MD01G1087600_novel03	MD01G1087600,MD01G1087600_novel03
Chr01	MD01G1087600	-	A3	19701018-19700782	MD01G1087600_novel03	MD01G1087600_novel02,MD01G1087600_novel03
Chr01	MD01G1087600	-	A3	19701018-19700840	MD01G1087600	MD01G1087600_novel02,MD01G1087600
Chr01	MD01G1090900	+	A3	20580363-20580620	MD01G1090900_novel05,MD01G1090900	MD01G1090900_novel03,MD01G1090900_novel01,MD01G1090900_novel04,MD01G1090900_novel08,MD01G1090900,MD01G1090900_novel05
Chr01	MD01G1090900	+	A3	20580960-20581320	MD01G1090900_novel04	MD01G1090900_novel05,MD01G1090900_novel06,MD01G1090900_novel07,MD01G1090900_novel04
Chr01	MD01G1092300	-	A3	20696701-20696695	MD01G1092300	MD01G1092300_novel01,MD01G1092300
Chr01	MD01G1095100	-	A3	21021340-21021208	MD01G1095100_novel01	MD01G1095100_novel02,MD01G1095100_novel01
Chr01	MD01G1095100	-	A3	21021514-21021208	MD01G1095100_novel01	MD01G1095100,MD01G1095100_novel01
Chr01	MD01G1095100	-	A3	21021514-21021340	MD01G1095100_novel02	MD01G1095100,MD01G1095100_novel02
Chr01	MD01G1095200	-	A3	21027201-21027182	MD01G1095200_novel03	MD01G1095200_novel02,MD01G1095200_novel03
Chr01	MD01G1095200	-	A3	21027346-21027201	MD01G1095200	MD01G1095200_novel04,MD01G1095200
Chr01	MD01G1099500	-	A3	21277231-21277217	MD01G1099500_novel01	MD01G1099500,MD01G1099500_novel02,MD01G1099500_novel01
Chr01	MD01G1099700	-	A3	21295994-21295854	MD01G1099700,MD01G1099700_novel08,MD01G1099700_novel04,MD01G1099700_novel02,MD01G1099700_novel03	MD01G1099700_novel01,MD01G1099700_novel02,MD01G1099700,MD01G1099700_novel04,MD01G1099700_novel08,MD01G1099700_novel03
Chr01	MD01G1099700	-	A3	21295994-21295974	MD01G1099700_novel05	MD01G1099700_novel01,MD01G1099700_novel05
Chr01	MD01G1100100	-	A3	21324615-21324603	MD01G1100100,MD01G1100100_novel02,MD01G1100100_novel01	MD01G1100100_novel03,MD01G1100100_novel01,MD01G1100100,MD01G1100100_novel02
Chr01	MD01G1100100	-	A3	21326653-21326472	MD01G1100100_novel03	MD01G1100100_novel02,MD01G1100100_novel03
Chr01	MD01G1103100	+	A3	21521224-21521642	MD01G1103100_novel03	MD01G1103100_novel02,MD01G1103100_novel03
Chr01	MD01G1103400	+	A3	21569910-21569976	MD01G1103400_novel01,MD01G1103400	MD01G1103400_novel02,MD01G1103400,MD01G1103400_novel01
Chr01	MD01G1103400	+	A3	21571954-21571965	MD01G1103400_novel02,MD01G1103400_novel01,MD01G1103400	MD01G1103400_novel03,MD01G1103400,MD01G1103400_novel01,MD01G1103400_novel02
Chr01	MD01G1103400	+	A3	21572472-21572483	MD01G1103400_novel02,MD01G1103400	MD01G1103400_novel01,MD01G1103400_novel03,MD01G1103400,MD01G1103400_novel02
Chr01	MD01G1103400	+	A3	21573482-21573485	MD01G1103400	MD01G1103400_novel01,MD01G1103400_novel02,MD01G1103400_novel03,MD01G1103400
Chr01	MD01G1104900	+	A3	21803851-21803939	MD01G1104900_novel04	MD01G1104900,MD01G1104900_novel01,MD01G1104900_novel02,MD01G1104900_novel03,MD01G1104900_novel05,MD01G1104900_novel04
Chr01	MD01G1105200	-	A3	21826210-21826192	MD01G1105200	MD01G1105200_novel02,MD01G1105200_novel01,MD01G1105200
Chr01	MD01G1106000	-	A3	21924620-21924617	MD01G1106000_novel01	MD01G1106000,MD01G1106000_novel01
Chr01	MD01G1108200	+	A3	22116740-22116761	MD01G1108200_novel04,MD01G1108200_novel05,MD01G1108200_novel06,MD01G1108200_novel01,MD01G1108200_novel03,MD01G1108200	MD01G1108200_novel02,MD01G1108200,MD01G1108200_novel01,MD01G1108200_novel03,MD01G1108200_novel04,MD01G1108200_novel05,MD01G1108200_novel06
Chr01	MD01G1110800	+	A3	22350228-22350242	MD01G1110800_novel02	MD01G1110800,MD01G1110800_novel01,MD01G1110800_novel03,MD01G1110800_novel02
Chr01	MD01G1110800	+	A3	22353563-22353566	MD01G1110800_novel04,MD01G1110800_novel02,MD01G1110800_novel01,MD01G1110800	MD01G1110800_novel03,MD01G1110800_novel05,MD01G1110800_novel06,MD01G1110800_novel07,MD01G1110800,MD01G1110800_novel02,MD01G1110800_novel01,MD01G1110800_novel04
Chr01	MD01G1111300	-	A3	22386435-22386432	MD01G1111300_novel01	MD01G1111300_novel03,MD01G1111300_novel02,MD01G1111300_novel01
Chr01	MD01G1112400	-	A3	22662079-22662043	MD01G1112400	MD01G1112400_novel01,MD01G1112400
Chr01	MD01G1113500	-	A3	22759566-22759544	MD01G1113500_novel02	MD01G1113500_novel03,MD01G1113500,MD01G1113500_novel09,MD01G1113500_novel08,MD01G1113500_novel07,MD01G1113500_novel01,MD01G1113500_novel04,MD01G1113500_novel06,MD01G1113500_novel02
Chr01	MD01G1113500	-	A3	22759633-22759544	MD01G1113500_novel02	MD01G1113500_novel10,MD01G1113500_novel02
Chr01	MD01G1113500	-	A3	22759633-22759566	MD01G1113500_novel09,MD01G1113500_novel08,MD01G1113500,MD01G1113500_novel01,MD01G1113500_novel07,MD01G1113500_novel06,MD01G1113500_novel04,MD01G1113500_novel03	MD01G1113500_novel10,MD01G1113500_novel03,MD01G1113500,MD01G1113500_novel09,MD01G1113500_novel08,MD01G1113500_novel07,MD01G1113500_novel01,MD01G1113500_novel04,MD01G1113500_novel06
Chr01	MD01G1114800	-	A3	22906138-22906128	MD01G1114800_novel03,MD01G1114800_novel01,MD01G1114800,MD01G1114800_novel06,MD01G1114800_novel05,MD01G1114800_novel04	MD01G1114800_novel02,MD01G1114800_novel03,MD01G1114800,MD01G1114800_novel04,MD01G1114800_novel05,MD01G1114800_novel06,MD01G1114800_novel01
Chr01	MD01G1114800	-	A3	22908783-22908781	MD01G1114800_novel03,MD01G1114800_novel02,MD01G1114800,MD01G1114800_novel05	MD01G1114800_novel04,MD01G1114800_novel03,MD01G1114800,MD01G1114800_novel05,MD01G1114800_novel02
Chr01	MD01G1115100	-	A3	22926887-22926872	MD01G1115100,MD01G1115100_novel03	MD01G1115100_novel02,MD01G1115100_novel01,MD01G1115100,MD01G1115100_novel03
Chr01	MD01G1115100	-	A3	22927960-22927909	MD01G1115100_novel03,MD01G1115100_novel02	MD01G1115100,MD01G1115100_novel01,MD01G1115100_novel03,MD01G1115100_novel02
Chr01	MD01G1116500	-	A3	23000277-23000260	MD01G1116500	MD01G1116500_novel01,MD01G1116500
Chr01	MD01G1117300	+	A3	23113451-23113454	MD01G1117300,MD01G1117300_novel01	MD01G1117300_novel02,MD01G1117300_novel04,MD01G1117300_novel05,MD01G1117300_novel06,MD01G1117300_novel01,MD01G1117300
Chr01	MD01G1117500	-	A3	23134275-23134270	MD01G1117500_novel03	MD01G1117500_novel01,MD01G1117500_novel02,MD01G1117500_novel03
Chr01	MD01G1120600	-	A3	23407454-23407282	MD01G1120600	MD01G1120600_novel01,MD01G1120600
Chr01	MD01G1120700	+	A3	23431230-23431255	MD01G1120700_novel02	MD01G1120700,MD01G1120700_novel01,MD01G1120700_novel02
Chr01	MD01G1122700	+	A3	23582545-23582547	MD01G1122700	MD01G1122700_novel01,MD01G1122700_novel02,MD01G1122700
Chr01	MD01G1123100	-	A3	23629869-23629816	MD01G1123100_novel01	MD01G1123100,MD01G1123100_novel02,MD01G1123100_novel03,MD01G1123100_novel01
Chr01	MD01G1123100	-	A3	23632199-23632192	MD01G1123100_novel03	MD01G1123100,MD01G1123100_novel01,MD01G1123100_novel02,MD01G1123100_novel03
Chr01	MD01G1125100	+	A3	23771647-23771674	MD01G1125100,MD01G1125100_novel03	MD01G1125100_novel01,MD01G1125100_novel02,MD01G1125100_novel03,MD01G1125100
Chr01	MD01G1126400	-	A3	23815480-23815453	MD01G1126400_novel02,MD01G1126400_novel01,MD01G1126400	MD01G1126400_novel03,MD01G1126400,MD01G1126400_novel02,MD01G1126400_novel01
Chr01	MD01G1126400	-	A3	23815604-23815584	MD01G1126400_novel02	MD01G1126400,MD01G1126400_novel04,MD01G1126400_novel01,MD01G1126400_novel03,MD01G1126400_novel02
Chr01	MD01G1130500	+	A3	24112209-24113121	MD01G1130500_novel02	MD01G1130500_novel03,MD01G1130500_novel02
Chr01	MD01G1130600	+	A3	24119863-24119942	MD01G1130600_novel03	MD01G1130600,MD01G1130600_novel03
Chr01	MD01G1133900	-	A3	24360844-24360831	MD01G1133900	MD01G1133900_novel02,MD01G1133900
Chr01	MD01G1135000	+	A3	24446284-24446858	MD01G1135000,MD01G1135000_novel06	MD01G1135000_novel05,MD01G1135000,MD01G1135000_novel06
Chr01	MD01G1135000	+	A3	24447543-24447572	MD01G1135000_novel03,MD01G1135000_novel01,MD01G1135000_novel06,MD01G1135000_novel04,MD01G1135000_novel05,MD01G1135000	MD01G1135000_novel02,MD01G1135000,MD01G1135000_novel01,MD01G1135000_novel03,MD01G1135000_novel04,MD01G1135000_novel05,MD01G1135000_novel06
Chr01	MD01G1135500	+	A3	24465185-24465192	MD01G1135500_novel01,MD01G1135500,MD01G1135500_novel05,MD01G1135500_novel04	MD01G1135500_novel02,MD01G1135500_novel03,MD01G1135500_novel01,MD01G1135500,MD01G1135500_novel04,MD01G1135500_novel05
Chr01	MD01G1135700	+	A3	24490617-24490638	MD01G1135700_novel01,MD01G1135700,MD01G1135700_novel03	MD01G1135700_novel02,MD01G1135700_novel01,MD01G1135700,MD01G1135700_novel03
Chr01	MD01G1135700	+	A3	24492561-24492580	MD01G1135700_novel01	MD01G1135700_novel02,MD01G1135700,MD01G1135700_novel03,MD01G1135700_novel01
Chr01	MD01G1136100	-	A3	24502913-24502797	MD01G1136100_novel02	MD01G1136100,MD01G1136100_novel03,MD01G1136100_novel01,MD01G1136100_novel02
Chr01	MD01G1136100	-	A3	24505564-24505559	MD01G1136100_novel02,MD01G1136100,MD01G1136100_novel03	MD01G1136100_novel01,MD01G1136100,MD01G1136100_novel02,MD01G1136100_novel03
Chr01	MD01G1139400	-	A3	24907470-24907454	MD01G1139400_novel01	MD01G1139400,MD01G1139400_novel02,MD01G1139400_novel01
Chr01	MD01G1140200	-	A3	24957872-24957868	MD01G1140200_novel02	MD01G1140200,MD01G1140200_novel04,MD01G1140200_novel03,MD01G1140200_novel02
Chr01	MD01G1141400	-	A3	25044107-25043206	MD01G1141400	MD01G1141400_novel01,MD01G1141400
Chr01	MD01G1142100	+	A3	25156482-25156499	MD01G1142100_novel01,MD01G1142100	MD01G1142100_novel02,MD01G1142100,MD01G1142100_novel01
Chr01	MD01G1142100	+	A3	25158519-25158522	MD01G1142100_novel01	MD01G1142100,MD01G1142100_novel02,MD01G1142100_novel01
Chr01	MD01G1147000	-	A3	25611746-25611436	MD01G1147000,MD01G1147000_novel06	MD01G1147000_novel04,MD01G1147000,MD01G1147000_novel06
Chr01	MD01G1147600	-	A3	25644657-25644652	MD01G1147600_novel02	MD01G1147600_novel01,MD01G1147600,MD01G1147600_novel02
Chr01	MD01G1147600	-	A3	25646380-25646348	MD01G1147600_novel01	MD01G1147600,MD01G1147600_novel01
Chr01	MD01G1152100	+	A3	26078725-26079179	MD01G1152100	MD01G1152100_novel02,MD01G1152100
Chr01	MD01G1152200	-	A3	26084770-26084735	MD01G1152200_novel01	MD01G1152200,MD01G1152200_novel02,MD01G1152200_novel01
Chr01	MD01G1154700	+	A3	26299099-26299112	MD01G1154700_novel02	MD01G1154700_novel01,MD01G1154700_novel03,MD01G1154700_novel04,MD01G1154700,MD01G1154700_novel05,MD01G1154700_novel06,MD01G1154700_novel07,MD01G1154700_novel08,MD01G1154700_novel02
Chr01	MD01G1154700	+	A3	26302808-26302826	MD01G1154700_novel01	MD01G1154700_novel02,MD01G1154700_novel03,MD01G1154700_novel04,MD01G1154700,MD01G1154700_novel05,MD01G1154700_novel06,MD01G1154700_novel07,MD01G1154700_novel08,MD01G1154700_novel09,MD01G1154700_novel10,MD01G1154700_novel11,MD01G1154700_novel12,MD01G1154700_novel13,MD01G1154700_novel14,MD01G1154700_novel15,MD01G1154700_novel16,MD01G1154700_novel01
Chr01	MD01G1158000	-	A3	26483185-26483108	MD01G1158000_novel09,MD01G1158000_novel08,MD01G1158000_novel10,MD01G1158000_novel12,MD01G1158000_novel13,MD01G1158000_novel14,MD01G1158000_novel15,MD01G1158000_novel05,MD01G1158000_novel04,MD01G1158000_novel11,MD01G1158000,MD01G1158000_novel03,MD01G1158000_novel02,MD01G1158000_novel01	MD01G1158000_novel06,MD01G1158000_novel07,MD01G1158000_novel04,MD01G1158000,MD01G1158000_novel12,MD01G1158000_novel13,MD01G1158000_novel05,MD01G1158000_novel10,MD01G1158000_novel09,MD01G1158000_novel01,MD01G1158000_novel02,MD01G1158000_novel11,MD01G1158000_novel03,MD01G1158000_novel08,MD01G1158000_novel14,MD01G1158000_novel15
Chr01	MD01G1158000	-	A3	26484721-26484175	MD01G1158000_novel10,MD01G1158000_novel09,MD01G1158000_novel08,MD01G1158000_novel11	MD01G1158000_novel03,MD01G1158000_novel10,MD01G1158000_novel09,MD01G1158000_novel11,MD01G1158000_novel08
Chr01	MD01G1158000	-	A3	26485071-26485050	MD01G1158000_novel09,MD01G1158000_novel08,MD01G1158000_novel02,MD01G1158000_novel12,MD01G1158000_novel13,MD01G1158000_novel14,MD01G1158000_novel15,MD01G1158000_novel05,MD01G1158000_novel06,MD01G1158000_novel07,MD01G1158000_novel16,MD01G1158000_novel04,MD01G1158000,MD01G1158000_novel03,MD01G1158000_novel11,MD01G1158000_novel01	MD01G1158000_novel10,MD01G1158000_novel04,MD01G1158000,MD01G1158000_novel12,MD01G1158000_novel13,MD01G1158000_novel05,MD01G1158000_novel09,MD01G1158000_novel01,MD01G1158000_novel06,MD01G1158000_novel02,MD01G1158000_novel16,MD01G1158000_novel11,MD01G1158000_novel03,MD01G1158000_novel07,MD01G1158000_novel08,MD01G1158000_novel14,MD01G1158000_novel15
Chr01	MD01G1158000	-	A3	26485689-26485466	MD01G1158000_novel08,MD01G1158000_novel10,MD01G1158000_novel11,MD01G1158000_novel12,MD01G1158000,MD01G1158000_novel15,MD01G1158000_novel07,MD01G1158000_novel16,MD01G1158000_novel01	MD01G1158000_novel13,MD01G1158000_novel05,MD01G1158000,MD01G1158000_novel12,MD01G1158000_novel10,MD01G1158000_novel01,MD01G1158000_novel16,MD01G1158000_novel11,MD01G1158000_novel07,MD01G1158000_novel08,MD01G1158000_novel15
Chr01	MD01G1158000	-	A3	26485714-26485466	MD01G1158000_novel08,MD01G1158000_novel10,MD01G1158000,MD01G1158000_novel12,MD01G1158000_novel15,MD01G1158000_novel16,MD01G1158000_novel07,MD01G1158000_novel11,MD01G1158000_novel01	MD01G1158000_novel04,MD01G1158000_novel09,MD01G1158000_novel06,MD01G1158000_novel14,MD01G1158000,MD01G1158000_novel12,MD01G1158000_novel10,MD01G1158000_novel01,MD01G1158000_novel16,MD01G1158000_novel11,MD01G1158000_novel07,MD01G1158000_novel08,MD01G1158000_novel15
Chr01	MD01G1158000	-	A3	26485714-26485689	MD01G1158000_novel13,MD01G1158000_novel05	MD01G1158000_novel04,MD01G1158000_novel09,MD01G1158000_novel06,MD01G1158000_novel14,MD01G1158000_novel13,MD01G1158000_novel05
Chr01	MD01G1161200	+	A3	26656444-26656736	MD01G1161200_novel02	MD01G1161200,MD01G1161200_novel02
Chr01	MD01G1161200	+	A3	26656618-26656736	MD01G1161200_novel03	MD01G1161200_novel04,MD01G1161200_novel03
Chr01	MD01G1164500	+	A3	26883976-26883979	MD01G1164500	MD01G1164500_novel01,MD01G1164500
Chr01	MD01G1164700	+	A3	26914169-26914432	MD01G1164700	MD01G1164700_novel03,MD01G1164700
Chr01	MD01G1167800	-	A3	27229597-27229579	MD01G1167800_novel01	MD01G1167800,MD01G1167800_novel01
Chr01	MD01G1168900	+	A3	27300318-27300328	MD01G1168900_novel02	MD01G1168900,MD01G1168900_novel02
Chr01	MD01G1169300	-	A3	27328537-27328523	MD01G1169300_novel03	MD01G1169300_novel01,MD01G1169300_novel04,MD01G1169300,MD01G1169300_novel02,MD01G1169300_novel03
Chr01	MD01G1169300	-	A3	27329284-27329281	MD01G1169300_novel04	MD01G1169300_novel03,MD01G1169300_novel01,MD01G1169300,MD01G1169300_novel02,MD01G1169300_novel04
Chr01	MD01G1169300	-	A3	27331181-27331152	MD01G1169300_novel01,MD01G1169300_novel04	MD01G1169300_novel03,MD01G1169300_novel02,MD01G1169300_novel01,MD01G1169300_novel04
Chr01	MD01G1169800	-	A3	27345264-27345219	MD01G1169800_novel01	MD01G1169800,MD01G1169800_novel01
Chr01	MD01G1171200	+	A3	27404490-27404590	MD01G1171200,MD01G1171200_novel01	MD01G1171200_novel02,MD01G1171200,MD01G1171200_novel01
Chr01	MD01G1171900	+	A3	27430550-27430561	MD01G1171900_novel01	MD01G1171900_novel02,MD01G1171900_novel01
Chr01	MD01G1171900	+	A3	27430550-27430563	MD01G1171900	MD01G1171900_novel02,MD01G1171900
Chr01	MD01G1171900	+	A3	27430561-27430563	MD01G1171900	MD01G1171900_novel01,MD01G1171900
Chr01	MD01G1172600	+	A3	27465871-27466113	MD01G1172600_novel03	MD01G1172600_novel02,MD01G1172600_novel03
Chr01	MD01G1172800	-	A3	27477416-27476974	MD01G1172800_novel01	MD01G1172800_novel02,MD01G1172800_novel01
Chr01	MD01G1173400	-	A3	27509788-27509746	MD01G1173400_novel01,MD01G1173400_novel05	MD01G1173400,MD01G1173400_novel02,MD01G1173400_novel05,MD01G1173400_novel01
Chr01	MD01G1173400	-	A3	27510020-27510014	MD01G1173400_novel02,MD01G1173400	MD01G1173400_novel06,MD01G1173400_novel01,MD01G1173400,MD01G1173400_novel02
Chr01	MD01G1175000	-	A3	27621917-27621915	MD01G1175000	MD01G1175000_novel01,MD01G1175000
Chr01	MD01G1177600	+	A3	27818298-27818321	MD01G1177600_novel02,MD01G1177600_novel01	MD01G1177600,MD01G1177600_novel01,MD01G1177600_novel02
Chr01	MD01G1178000	-	A3	27840348-27840331	MD01G1178000_novel05,MD01G1178000_novel04,MD01G1178000_novel07,MD01G1178000_novel01,MD01G1178000_novel03,MD01G1178000_novel02	MD01G1178000,MD01G1178000_novel03,MD01G1178000_novel04,MD01G1178000_novel07,MD01G1178000_novel01,MD01G1178000_novel02,MD01G1178000_novel05
Chr01	MD01G1178000	-	A3	27841307-27841304	MD01G1178000_novel04,MD01G1178000_novel06,MD01G1178000_novel01,MD01G1178000_novel03,MD01G1178000_novel02,MD01G1178000	MD01G1178000_novel07,MD01G1178000,MD01G1178000_novel03,MD01G1178000_novel04,MD01G1178000_novel06,MD01G1178000_novel01,MD01G1178000_novel02
Chr01	MD01G1178000	-	A3	27842253-27842232	MD01G1178000,MD01G1178000_novel05,MD01G1178000_novel04,MD01G1178000_novel07,MD01G1178000_novel06,MD01G1178000_novel01	MD01G1178000_novel03,MD01G1178000_novel02,MD01G1178000,MD01G1178000_novel04,MD01G1178000_novel07,MD01G1178000_novel06,MD01G1178000_novel01,MD01G1178000_novel05
Chr01	MD01G1178000	-	A3	27842537-27842515	MD01G1178000	MD01G1178000_novel01,MD01G1178000_novel02,MD01G1178000_novel05,MD01G1178000
Chr01	MD01G1178000	-	A3	27842771-27842732	MD01G1178000_novel04,MD01G1178000_novel06,MD01G1178000_novel03	MD01G1178000,MD01G1178000_novel01,MD01G1178000_novel02,MD01G1178000_novel05,MD01G1178000_novel03,MD01G1178000_novel04,MD01G1178000_novel06
Chr01	MD01G1182700	+	A3	28125774-28125796	MD01G1182700_novel08,MD01G1182700_novel02,MD01G1182700_novel01,MD01G1182700,MD01G1182700_novel06,MD01G1182700_novel05,MD01G1182700_novel04	MD01G1182700_novel03,MD01G1182700_novel01,MD01G1182700,MD01G1182700_novel04,MD01G1182700_novel02,MD01G1182700_novel05,MD01G1182700_novel06,MD01G1182700_novel08
Chr01	MD01G1189800	+	A3	28884028-28884034	MD01G1189800_novel01	MD01G1189800,MD01G1189800_novel01
Chr01	MD01G1189800	+	A3	28884607-28884648	MD01G1189800	MD01G1189800_novel01,MD01G1189800
Chr01	MD01G1193200	-	A3	29204058-29204052	MD01G1193200	MD01G1193200_novel02,MD01G1193200
Chr01	MD01G1195700	+	A3	29401296-29401429	MD01G1195700_novel02	MD01G1195700,MD01G1195700_novel02
Chr01	MD01G1196000	+	A3	29421759-29421770	MD01G1196000_novel08,MD01G1196000_novel03,MD01G1196000_novel02,MD01G1196000_novel05,MD01G1196000_novel04,MD01G1196000_novel07,MD01G1196000_novel06,MD01G1196000	MD01G1196000_novel01,MD01G1196000,MD01G1196000_novel03,MD01G1196000_novel04,MD01G1196000_novel06,MD01G1196000_novel02,MD01G1196000_novel07,MD01G1196000_novel05,MD01G1196000_novel08
Chr01	MD01G1196000	+	A3	29423669-29423680	MD01G1196000_novel04	MD01G1196000,MD01G1196000_novel01,MD01G1196000_novel03,MD01G1196000_novel06,MD01G1196000_novel02,MD01G1196000_novel07,MD01G1196000_novel05,MD01G1196000_novel08,MD01G1196000_novel09,MD01G1196000_novel04
Chr01	MD01G1196700	+	A3	29457856-29457876	MD01G1196700_novel06,MD01G1196700_novel07,MD01G1196700_novel04,MD01G1196700_novel05,MD01G1196700_novel02,MD01G1196700_novel03,MD01G1196700_novel01	MD01G1196700,MD01G1196700_novel02,MD01G1196700_novel04,MD01G1196700_novel03,MD01G1196700_novel01,MD01G1196700_novel05,MD01G1196700_novel07,MD01G1196700_novel06
Chr01	MD01G1196700	+	A3	29458717-29458997	MD01G1196700_novel05	MD01G1196700_novel06,MD01G1196700_novel05
Chr01	MD01G1196700	+	A3	29458717-29459099	MD01G1196700	MD01G1196700_novel06,MD01G1196700
Chr01	MD01G1196700	+	A3	29458997-29459099	MD01G1196700	MD01G1196700_novel05,MD01G1196700
Chr01	MD01G1197300	-	A3	29545597-29545548	MD01G1197300_novel05	MD01G1197300_novel03,MD01G1197300,MD01G1197300_novel04,MD01G1197300_novel01,MD01G1197300_novel02,MD01G1197300_novel06,MD01G1197300_novel05
Chr01	MD01G1197300	-	A3	29547562-29547316	MD01G1197300_novel02	MD01G1197300_novel03,MD01G1197300_novel02
Chr01	MD01G1197300	-	A3	29547815-29547316	MD01G1197300_novel02	MD01G1197300,MD01G1197300_novel05,MD01G1197300_novel02
Chr01	MD01G1197300	-	A3	29547815-29547562	MD01G1197300_novel03	MD01G1197300,MD01G1197300_novel05,MD01G1197300_novel03
Chr01	MD01G1198300	+	A3	29611113-29611117	MD01G1198300_novel03	MD01G1198300,MD01G1198300_novel01,MD01G1198300_novel02,MD01G1198300_novel03
Chr01	MD01G1198300	+	A3	29611894-29611899	MD01G1198300,MD01G1198300_novel01,MD01G1198300_novel02	MD01G1198300_novel03,MD01G1198300,MD01G1198300_novel01,MD01G1198300_novel02
Chr01	MD01G1200700	+	A3	29737082-29737088	MD01G1200700_novel04	MD01G1200700_novel01,MD01G1200700,MD01G1200700_novel02,MD01G1200700_novel03,MD01G1200700_novel04
Chr01	MD01G1203100	-	A3	29911365-29911361	MD01G1203100_novel03,MD01G1203100_novel11,MD01G1203100,MD01G1203100_novel09,MD01G1203100_novel08,MD01G1203100_novel07,MD01G1203100_novel06,MD01G1203100_novel05,MD01G1203100_novel10,MD01G1203100_novel02,MD01G1203100_novel01	MD01G1203100_novel04,MD01G1203100_novel11,MD01G1203100,MD01G1203100_novel09,MD01G1203100_novel03,MD01G1203100_novel01,MD01G1203100_novel10,MD01G1203100_novel05,MD01G1203100_novel08,MD01G1203100_novel07,MD01G1203100_novel02,MD01G1203100_novel06
Chr01	MD01G1203100	-	A3	29911590-29911574	MD01G1203100_novel06,MD01G1203100_novel04,MD01G1203100_novel03	MD01G1203100_novel11,MD01G1203100,MD01G1203100_novel09,MD01G1203100_novel01,MD01G1203100_novel10,MD01G1203100_novel05,MD01G1203100_novel08,MD01G1203100_novel07,MD01G1203100_novel02,MD01G1203100_novel03,MD01G1203100_novel04,MD01G1203100_novel06
Chr01	MD01G1203100	-	A3	29911959-29911927	MD01G1203100_novel03	MD01G1203100_novel11,MD01G1203100,MD01G1203100_novel09,MD01G1203100_novel01,MD01G1203100_novel04,MD01G1203100_novel10,MD01G1203100_novel05,MD01G1203100_novel08,MD01G1203100_novel07,MD01G1203100_novel02,MD01G1203100_novel06,MD01G1203100_novel03
Chr01	MD01G1204700	+	A3	30028016-30028045	MD01G1204700,MD01G1204700_novel01,MD01G1204700_novel02	MD01G1204700_novel03,MD01G1204700_novel01,MD01G1204700_novel02,MD01G1204700
Chr01	MD01G1205000	+	A3	30043656-30043666	MD01G1205000_novel02,MD01G1205000_novel03	MD01G1205000_novel01,MD01G1205000,MD01G1205000_novel04,MD01G1205000_novel02,MD01G1205000_novel03
Chr01	MD01G1205100	+	A3	30049570-30049572	MD01G1205100	MD01G1205100_novel01,MD01G1205100
Chr01	MD01G1205100	+	A3	30050777-30050787	MD01G1205100_novel01	MD01G1205100,MD01G1205100_novel01
Chr01	MD01G1205300	-	A3	30056159-30056141	MD01G1205300_novel01,MD01G1205300	MD01G1205300_novel02,MD01G1205300_novel01,MD01G1205300
Chr01	MD01G1207300	-	A3	30257112-30257095	MD01G1207300	MD01G1207300_novel01,MD01G1207300
Chr01	MD01G1210100	+	A3	30405514-30405519	MD01G1210100_novel04,MD01G1210100_novel03	MD01G1210100,MD01G1210100_novel01,MD01G1210100_novel02,MD01G1210100_novel03,MD01G1210100_novel04
Chr01	MD01G1210100	+	A3	30406525-30406625	MD01G1210100_novel04	MD01G1210100,MD01G1210100_novel01,MD01G1210100_novel02,MD01G1210100_novel03,MD01G1210100_novel04
Chr01	MD01G1212000	+	A3	30545184-30545189	MD01G1212000_novel08,MD01G1212000_novel11,MD01G1212000_novel15,MD01G1212000_novel14,MD01G1212000_novel13,MD01G1212000_novel06,MD01G1212000_novel07,MD01G1212000_novel03	MD01G1212000,MD01G1212000_novel12,MD01G1212000_novel03,MD01G1212000_novel06,MD01G1212000_novel13,MD01G1212000_novel07,MD01G1212000_novel08,MD01G1212000_novel11,MD01G1212000_novel14,MD01G1212000_novel15
Chr01	MD01G1212000	+	A3	30545671-30545681	MD01G1212000_novel06,MD01G1212000_novel14,MD01G1212000_novel03	MD01G1212000,MD01G1212000_novel01,MD01G1212000_novel02,MD01G1212000_novel04,MD01G1212000_novel05,MD01G1212000_novel13,MD01G1212000_novel12,MD01G1212000_novel07,MD01G1212000_novel08,MD01G1212000_novel09,MD01G1212000_novel11,MD01G1212000_novel15,MD01G1212000_novel10,MD01G1212000_novel03,MD01G1212000_novel06,MD01G1212000_novel14
Chr01	MD01G1212000	+	A3	30550036-30550057	MD01G1212000_novel03	MD01G1212000,MD01G1212000_novel05,MD01G1212000_novel14,MD01G1212000_novel15,MD01G1212000_novel18,MD01G1212000_novel03
Chr01	MD01G1212000	+	A3	30550661-30550675	MD01G1212000_novel08,MD01G1212000_novel16,MD01G1212000_novel14,MD01G1212000_novel11	MD01G1212000_novel05,MD01G1212000_novel03,MD01G1212000_novel08,MD01G1212000_novel11,MD01G1212000_novel14,MD01G1212000_novel16
Chr01	MD01G1212000	+	A3	30550973-30551067	MD01G1212000_novel10	MD01G1212000_novel09,MD01G1212000_novel10
Chr01	MD01G1212000	+	A3	30550972-30550973	MD01G1212000_novel11	MD01G1212000_novel05,MD01G1212000_novel11
Chr01	MD01G1212000	+	A3	30551191-30551195	MD01G1212000_novel08	MD01G1212000_novel03,MD01G1212000_novel14,MD01G1212000_novel16,MD01G1212000_novel08
Chr01	MD01G1212000	+	A3	30551191-30551195	MD01G1212000_novel10	MD01G1212000_novel05,MD01G1212000_novel09,MD01G1212000_novel11,MD01G1212000_novel10
Chr01	MD01G1214000	-	A3	30749900-30749897	MD01G1214000_novel01	MD01G1214000,MD01G1214000_novel01
Chr01	MD01G1214300	+	A3	30761867-30761939	MD01G1214300_novel05,MD01G1214300_novel04,MD01G1214300_novel06,MD01G1214300_novel02	MD01G1214300,MD01G1214300_novel06,MD01G1214300_novel04,MD01G1214300_novel05,MD01G1214300_novel02
Chr01	MD01G1214300	+	A3	30762810-30762959	MD01G1214300_novel04,MD01G1214300_novel01	MD01G1214300_novel05,MD01G1214300_novel04,MD01G1214300_novel01
Chr01	MD01G1216100	-	A3	30910280-30910263	MD01G1216100_novel01,MD01G1216100_novel02	MD01G1216100,MD01G1216100_novel03,MD01G1216100_novel01,MD01G1216100_novel02
Chr01	MD01G1218500	+	A3	31072225-31072261	MD01G1218500_novel01	MD01G1218500,MD01G1218500_novel02,MD01G1218500_novel01
Chr01	MD01G1219700	+	A3	31209509-31209513	MD01G1219700_novel01	MD01G1219700_novel02,MD01G1219700,MD01G1219700_novel01
Chr01	MD01G1219800	-	A3	31213832-31213819	MD01G1219800	MD01G1219800_novel01,MD01G1219800
Chr01	MD01G1219900	+	A3	31226350-31226380	MD01G1219900_novel02	MD01G1219900_novel01,MD01G1219900,MD01G1219900_novel03,MD01G1219900_novel02
Chr01	MD01G1220400	-	A3	31247477-31247439	MD01G1220400	MD01G1220400_novel01,MD01G1220400
Chr01	MD01G1220400	-	A3	31247499-31247439	MD01G1220400	MD01G1220400_novel03,MD01G1220400
Chr01	MD01G1220400	-	A3	31247499-31247477	MD01G1220400_novel01	MD01G1220400_novel03,MD01G1220400_novel01
Chr01	MD01G1221000	+	A3	31309452-31309454	MD01G1221000	MD01G1221000_novel01,MD01G1221000_novel04,MD01G1221000
Chr01	MD01G1223600	-	A3	31524458-31524092	MD01G1223600	MD01G1223600_novel01,MD01G1223600
Chr01	MD01G1224100	-	A3	31540832-31540815	MD01G1224100_novel01,MD01G1224100_novel03,MD01G1224100_novel04	MD01G1224100_novel05,MD01G1224100_novel02,MD01G1224100,MD01G1224100_novel04,MD01G1224100_novel01,MD01G1224100_novel03
Chr01	MD01G1225000	-	A3	31589419-31589416	MD01G1225000	MD01G1225000_novel01,MD01G1225000
Chr01	MD01G1227200	-	A3	31705955-31705951	MD01G1227200_novel01	MD01G1227200,MD01G1227200_novel01
Chr01	MD01G1227300	+	A3	31718536-31718543	MD01G1227300	MD01G1227300_novel01,MD01G1227300_novel03,MD01G1227300_novel04,MD01G1227300_novel05,MD01G1227300_novel06,MD01G1227300
Chr01	MD01G1227700	-	A3	31737043-31737037	MD01G1227700	MD01G1227700_novel01,MD01G1227700
Chr01	MD01G1227900	+	A3	31772815-31773234	MD01G1227900,MD01G1227900_novel02	MD01G1227900_novel04,MD01G1227900_novel02,MD01G1227900
Chr01	MD01G1229500	-	A3	31883442-31883407	MD01G1229500_novel03,MD01G1229500_novel08	MD01G1229500_novel04,MD01G1229500_novel03,MD01G1229500_novel08
Chr01	MD01G1232600	-	A3	32103230-32103132	MD01G1232600_novel01	MD01G1232600,MD01G1232600_novel01
Chr01	MD01G1234100	+	A3	32194544-32194550	MD01G1234100_novel03	MD01G1234100_novel01,MD01G1234100_novel02,MD01G1234100,MD01G1234100_novel03
Chr01	MD01G1234200	+	A3	32197837-32198105	MD01G1234200	MD01G1234200_novel02,MD01G1234200
Chr01	MD01G1234200	+	A3	32198391-32198731	MD01G1234200_novel02,MD01G1234200	MD01G1234200_novel01,MD01G1234200,MD01G1234200_novel02
Chr01	MD01G1234500	-	A3	32214704-32214687	MD01G1234500_novel01,MD01G1234500_novel05,MD01G1234500_novel03,MD01G1234500_novel02,MD01G1234500_novel22,MD01G1234500_novel21,MD01G1234500_novel20,MD01G1234500,MD01G1234500_novel04,MD01G1234500_novel16,MD01G1234500_novel17,MD01G1234500_novel14,MD01G1234500_novel15,MD01G1234500_novel12,MD01G1234500_novel13,MD01G1234500_novel10,MD01G1234500_novel11,MD01G1234500_novel09,MD01G1234500_novel08,MD01G123…	MD01G1234500_novel06,MD01G1234500_novel03,MD01G1234500_novel08,MD01G1234500_novel02,MD01G1234500_novel11,MD01G1234500_novel15,MD01G1234500_novel12,MD01G1234500_novel09,MD01G1234500_novel22,MD01G1234500_novel19,MD01G1234500_novel17,MD01G1234500_novel05,MD01G1234500_novel21,MD01G1234500_novel18,MD01G1234500,MD01G1234500_novel14,MD01G1234500_novel01,MD01G1234500_novel20,MD01G1234500_novel04,MD01G123…
Chr01	MD01G1234500	-	A3	32218652-32218646	MD01G1234500_novel16,MD01G1234500_novel03,MD01G1234500_novel15,MD01G1234500_novel05,MD01G1234500,MD01G1234500_novel07,MD01G1234500_novel13,MD01G1234500_novel01,MD01G1234500_novel12,MD01G1234500_novel04,MD01G1234500_novel10,MD01G1234500_novel09,MD01G1234500_novel06	MD01G1234500_novel08,MD01G1234500_novel02,MD01G1234500_novel11,MD01G1234500_novel14,MD01G1234500_novel03,MD01G1234500_novel15,MD01G1234500_novel12,MD01G1234500_novel09,MD01G1234500_novel05,MD01G1234500_novel06,MD01G1234500,MD01G1234500_novel01,MD01G1234500_novel04,MD01G1234500_novel13,MD01G1234500_novel10,MD01G1234500_novel16,MD01G1234500_novel07
Chr01	MD01G1234500	-	A3	32221088-32221080	MD01G1234500_novel10	MD01G1234500_novel03,MD01G1234500_novel08,MD01G1234500_novel02,MD01G1234500_novel11,MD01G1234500_novel09,MD01G1234500_novel05,MD01G1234500_novel06,MD01G1234500,MD01G1234500_novel01,MD01G1234500_novel04,MD01G1234500_novel07,MD01G1234500_novel10
Chr01	MD01G1235700	+	A3	32304283-32304286	MD01G1235700	MD01G1235700_novel01,MD01G1235700_novel02,MD01G1235700
Chr01	MD01G1236700	-	A3	32407691-32407635	MD01G1236700_novel03,MD01G1236700_novel05,MD01G1236700_novel04	MD01G1236700_novel02,MD01G1236700_novel01,MD01G1236700_novel05,MD01G1236700_novel04,MD01G1236700_novel03
Chr01	MD01G1236700	-	A3	32409680-32409652	MD01G1236700_novel02	MD01G1236700_novel05,MD01G1236700_novel04,MD01G1236700_novel03,MD01G1236700,MD01G1236700_novel02
Chr01	MD01G1236700	-	A3	32409685-32409652	MD01G1236700_novel02	MD01G1236700_novel01,MD01G1236700_novel02
Chr01	MD01G1236700	-	A3	32409685-32409680	MD01G1236700,MD01G1236700_novel05,MD01G1236700_novel03,MD01G1236700_novel04	MD01G1236700_novel01,MD01G1236700_novel05,MD01G1236700_novel04,MD01G1236700_novel03,MD01G1236700
Chr01	MD01G1236800	-	A3	32413550-32413528	MD01G1236800_novel03	MD01G1236800,MD01G1236800_novel03
Chr01	MD01G1236800	-	A3	32413613-32413528	MD01G1236800_novel03	MD01G1236800_novel04,MD01G1236800_novel03
Chr01	MD01G1236800	-	A3	32413613-32413550	MD01G1236800	MD01G1236800_novel04,MD01G1236800
Chr01	MD01G1237100	+	A3	32423049-32423070	MD01G1237100,MD01G1237100_novel02	MD01G1237100_novel04,MD01G1237100,MD01G1237100_novel02
Chr01	MD01G1237100	+	A3	32424455-32424462	MD01G1237100_novel04,MD01G1237100,MD01G1237100_novel02	MD01G1237100_novel01,MD01G1237100,MD01G1237100_novel02,MD01G1237100_novel04
Chr01	MD01G1237700	-	A3	32452266-32452256	MD01G1237700_novel03	MD01G1237700,MD01G1237700_novel02,MD01G1237700_novel03
Chr01	MD01G1237700	-	A3	32453163-32453153	MD01G1237700_novel03	MD01G1237700_novel01,MD01G1237700,MD01G1237700_novel02,MD01G1237700_novel03
Chr01	MD01G1238500	-	A3	32484346-32484280	MD01G1238500_novel01	MD01G1238500_novel02,MD01G1238500_novel01
Chr01	MD01G1238500	-	A3	32484418-32484280	MD01G1238500_novel01	MD01G1238500_novel03,MD01G1238500_novel01
Chr01	MD01G1238500	-	A3	32484418-32484346	MD01G1238500_novel02	MD01G1238500_novel03,MD01G1238500_novel02
Chr01	MD01G1239500	+	A3	32567876-32567958	MD01G1239500_novel01	MD01G1239500,MD01G1239500_novel03,MD01G1239500_novel04,MD01G1239500_novel01
Chr01	MD01G1239500	+	A3	32568824-32569031	MD01G1239500_novel04	MD01G1239500_novel01,MD01G1239500_novel02,MD01G1239500_novel03,MD01G1239500_novel04
Chr01	MD01G1239700	+	A3	32585967-32585970	MD01G1239700_novel11,MD01G1239700_novel06,MD01G1239700	MD01G1239700_novel01,MD01G1239700_novel02,MD01G1239700_novel03,MD01G1239700_novel04,MD01G1239700_novel05,MD01G1239700_novel07,MD01G1239700_novel08,MD01G1239700_novel10,MD01G1239700_novel12,MD01G1239700_novel09,MD01G1239700,MD01G1239700_novel06,MD01G1239700_novel11
Chr01	MD01G1239700	+	A3	32589310-32589556	MD01G1239700,MD01G1239700_novel13,MD01G1239700_novel01,MD01G1239700_novel11,MD01G1239700_novel03,MD01G1239700_novel04,MD01G1239700_novel06,MD01G1239700_novel07,MD01G1239700_novel08,MD01G1239700_novel14	MD01G1239700_novel02,MD01G1239700_novel05,MD01G1239700_novel09,MD01G1239700_novel01,MD01G1239700_novel03,MD01G1239700_novel04,MD01G1239700,MD01G1239700_novel06,MD01G1239700_novel07,MD01G1239700_novel08,MD01G1239700_novel11,MD01G1239700_novel13,MD01G1239700_novel14
Chr01	MD01G1239700	+	A3	32589730-32589737	MD01G1239700_novel09	MD01G1239700_novel01,MD01G1239700_novel02,MD01G1239700_novel03,MD01G1239700_novel04,MD01G1239700,MD01G1239700_novel05,MD01G1239700_novel06,MD01G1239700_novel07,MD01G1239700_novel08,MD01G1239700_novel11,MD01G1239700_novel10,MD01G1239700_novel12,MD01G1239700_novel13,MD01G1239700_novel14,MD01G1239700_novel09
Chr02	MD02G1000500	+	A3	12773-12796	MD02G1000500_novel01	MD02G1000500_novel02,MD02G1000500,MD02G1000500_novel01
Chr02	MD02G1001300	+	A3	79894-79907	MD02G1001300_novel02	MD02G1001300,MD02G1001300_novel01,MD02G1001300_novel04,MD02G1001300_novel05,MD02G1001300_novel02
Chr02	MD02G1002900	+	A3	230789-230796	MD02G1002900_novel01,MD02G1002900	MD02G1002900_novel02,MD02G1002900,MD02G1002900_novel01
Chr02	MD02G1003200	+	A3	238264-238268	MD02G1003200_novel01,MD02G1003200_novel02	MD02G1003200,MD02G1003200_novel01,MD02G1003200_novel02
Chr02	MD02G1003500	+	A3	257014-257042	MD02G1003500_novel05,MD02G1003500_novel02	MD02G1003500,MD02G1003500_novel03,MD02G1003500_novel04,MD02G1003500_novel02,MD02G1003500_novel05
Chr02	MD02G1003500	+	A3	257517-257553	MD02G1003500_novel03	MD02G1003500,MD02G1003500_novel01,MD02G1003500_novel02,MD02G1003500_novel04,MD02G1003500_novel05,MD02G1003500_novel06,MD02G1003500_novel03
Chr02	MD02G1003500	+	A3	258186-258212	MD02G1003500_novel04,MD02G1003500_novel05,MD02G1003500_novel02,MD02G1003500_novel03,MD02G1003500_novel01,MD02G1003500	MD02G1003500_novel06,MD02G1003500,MD02G1003500_novel03,MD02G1003500_novel01,MD02G1003500_novel02,MD02G1003500_novel04,MD02G1003500_novel05
Chr02	MD02G1003800	-	A3	267335-267311	MD02G1003800_novel03	MD02G1003800_novel04,MD02G1003800,MD02G1003800_novel01,MD02G1003800_novel02,MD02G1003800_novel03
Chr02	MD02G1005400	+	A3	384835-384853	MD02G1005400_novel01,MD02G1005400,MD02G1005400_novel03	MD02G1005400_novel02,MD02G1005400,MD02G1005400_novel01,MD02G1005400_novel03
Chr02	MD02G1008300	-	A3	516766-516735	MD02G1008300_novel01	MD02G1008300,MD02G1008300_novel04,MD02G1008300_novel03,MD02G1008300_novel01
Chr02	MD02G1009900	+	A3	658790-658828	MD02G1009900_novel10	MD02G1009900_novel02,MD02G1009900_novel03,MD02G1009900_novel10
Chr02	MD02G1009900	+	A3	658790-658895	MD02G1009900_novel15	MD02G1009900_novel02,MD02G1009900_novel03,MD02G1009900_novel15
Chr02	MD02G1009900	+	A3	658828-658895	MD02G1009900_novel15	MD02G1009900_novel10,MD02G1009900_novel15
Chr02	MD02G1011000	-	A3	711746-711434	MD02G1011000_novel06	MD02G1011000_novel05,MD02G1011000_novel07,MD02G1011000_novel01,MD02G1011000_novel06
Chr02	MD02G1011000	-	A3	711768-711434	MD02G1011000_novel06	MD02G1011000_novel02,MD02G1011000_novel06
Chr02	MD02G1011000	-	A3	711768-711746	MD02G1011000_novel05,MD02G1011000_novel07,MD02G1011000_novel08,MD02G1011000_novel01	MD02G1011000_novel02,MD02G1011000_novel05,MD02G1011000_novel08,MD02G1011000_novel07,MD02G1011000_novel01
Chr02	MD02G1011400	-	A3	725087-725071	MD02G1011400_novel02	MD02G1011400,MD02G1011400_novel01,MD02G1011400_novel02
Chr02	MD02G1011800	-	A3	754216-754205	MD02G1011800_novel01	MD02G1011800,MD02G1011800_novel02,MD02G1011800_novel01
Chr02	MD02G1013000	-	A3	828230-828227	MD02G1013000	MD02G1013000_novel01,MD02G1013000_novel04,MD02G1013000_novel03,MD02G1013000_novel02,MD02G1013000
Chr02	MD02G1013000	-	A3	832626-832585	MD02G1013000_novel02,MD02G1013000_novel01	MD02G1013000,MD02G1013000_novel01,MD02G1013000_novel02
Chr02	MD02G1013600	+	A3	861796-861816	MD02G1013600_novel01,MD02G1013600_novel02	MD02G1013600,MD02G1013600_novel01,MD02G1013600_novel02
Chr02	MD02G1013600	+	A3	862957-862965	MD02G1013600_novel01	MD02G1013600_novel02,MD02G1013600,MD02G1013600_novel01
Chr02	MD02G1016100	-	A3	1224298-1224283	MD02G1016100_novel01	MD02G1016100_novel03,MD02G1016100,MD02G1016100_novel06,MD02G1016100_novel02,MD02G1016100_novel05,MD02G1016100_novel04,MD02G1016100_novel01
Chr02	MD02G1016100	-	A3	1224466-1224452	MD02G1016100,MD02G1016100_novel04,MD02G1016100_novel05,MD02G1016100_novel01,MD02G1016100_novel03	MD02G1016100_novel02,MD02G1016100_novel03,MD02G1016100_novel01,MD02G1016100,MD02G1016100_novel05,MD02G1016100_novel04
Chr02	MD02G1018400	-	A3	1355665-1355623	MD02G1018400_novel02	MD02G1018400,MD02G1018400_novel01,MD02G1018400_novel04,MD02G1018400_novel03,MD02G1018400_novel05,MD02G1018400_novel02
Chr02	MD02G1018700	-	A3	1371172-1371163	MD02G1018700_novel02	MD02G1018700_novel01,MD02G1018700_novel02
Chr02	MD02G1020200	-	A3	1442567-1441748	MD02G1020200	MD02G1020200_novel01,MD02G1020200
Chr02	MD02G1022200	-	A3	1551206-1550970	MD02G1022200_novel04	MD02G1022200_novel03,MD02G1022200_novel04
Chr02	MD02G1022200	-	A3	1551235-1550970	MD02G1022200_novel04	MD02G1022200_novel05,MD02G1022200_novel04
Chr02	MD02G1022200	-	A3	1551235-1551206	MD02G1022200_novel03	MD02G1022200_novel05,MD02G1022200_novel03
Chr02	MD02G1022200	-	A3	1551503-1550970	MD02G1022200_novel04	MD02G1022200_novel02,MD02G1022200_novel04
Chr02	MD02G1022200	-	A3	1551503-1551206	MD02G1022200_novel03	MD02G1022200_novel02,MD02G1022200_novel03
Chr02	MD02G1022200	-	A3	1551503-1551235	MD02G1022200_novel05	MD02G1022200_novel02,MD02G1022200_novel05
Chr02	MD02G1022800	+	A3	1591552-1591613	MD02G1022800_novel02	MD02G1022800,MD02G1022800_novel04,MD02G1022800_novel06,MD02G1022800_novel03,MD02G1022800_novel05,MD02G1022800_novel07,MD02G1022800_novel02
Chr02	MD02G1027700	+	A3	2123798-2123836	MD02G1027700_novel05	MD02G1027700,MD02G1027700_novel01,MD02G1027700_novel07,MD02G1027700_novel03,MD02G1027700_novel02,MD02G1027700_novel04,MD02G1027700_novel06,MD02G1027700_novel08,MD02G1027700_novel09,MD02G1027700_novel11,MD02G1027700_novel05
Chr02	MD02G1027700	+	A3	2126064-2126080	MD02G1027700_novel06	MD02G1027700,MD02G1027700_novel01,MD02G1027700_novel07,MD02G1027700_novel03,MD02G1027700_novel02,MD02G1027700_novel04,MD02G1027700_novel08,MD02G1027700_novel05,MD02G1027700_novel09,MD02G1027700_novel12,MD02G1027700_novel13,MD02G1027700_novel14,MD02G1027700_novel15,MD02G1027700_novel06
Chr02	MD02G1027700	+	A3	2137860-2137872	MD02G1027700_novel05,MD02G1027700_novel18,MD02G1027700,MD02G1027700_novel06,MD02G1027700_novel20,MD02G1027700_novel21,MD02G1027700_novel04,MD02G1027700_novel11,MD02G1027700_novel07,MD02G1027700_novel13,MD02G1027700_novel12,MD02G1027700_novel02,MD02G1027700_novel14,MD02G1027700_novel17,MD02G1027700_novel16,MD02G1027700_novel19,MD02G1027700_novel15,MD02G1027700_novel09,MD02G1027700_novel08	MD02G1027700_novel03,MD02G1027700,MD02G1027700_novel07,MD02G1027700_novel02,MD02G1027700_novel04,MD02G1027700_novel06,MD02G1027700_novel08,MD02G1027700_novel05,MD02G1027700_novel09,MD02G1027700_novel11,MD02G1027700_novel12,MD02G1027700_novel13,MD02G1027700_novel14,MD02G1027700_novel15,MD02G1027700_novel16,MD02G1027700_novel17,MD02G1027700_novel18,MD02G1027700_novel19,MD02G1027700_novel20,MD02G102…
Chr02	MD02G1027700	+	A3	2139608-2139611	MD02G1027700_novel20	MD02G1027700,MD02G1027700_novel07,MD02G1027700_novel03,MD02G1027700_novel02,MD02G1027700_novel04,MD02G1027700_novel06,MD02G1027700_novel08,MD02G1027700_novel05,MD02G1027700_novel09,MD02G1027700_novel11,MD02G1027700_novel12,MD02G1027700_novel13,MD02G1027700_novel14,MD02G1027700_novel15,MD02G1027700_novel16,MD02G1027700_novel17,MD02G1027700_novel18,MD02G1027700_novel19,MD02G1027700_novel21,MD02G102…
Chr02	MD02G1027800	-	A3	2143476-2143472	MD02G1027800_novel01	MD02G1027800,MD02G1027800_novel02,MD02G1027800_novel01
Chr02	MD02G1030400	-	A3	2378680-2378656	MD02G1030400	MD02G1030400_novel01,MD02G1030400
Chr02	MD02G1032700	+	A3	2567493-2567517	MD02G1032700,MD02G1032700_novel01,MD02G1032700_novel02,MD02G1032700_novel03	MD02G1032700_novel04,MD02G1032700,MD02G1032700_novel01,MD02G1032700_novel02,MD02G1032700_novel03
Chr02	MD02G1042800	-	A3	3521799-3521788	MD02G1042800_novel02	MD02G1042800,MD02G1042800_novel04,MD02G1042800_novel01,MD02G1042800_novel05,MD02G1042800_novel06,MD02G1042800_novel03,MD02G1042800_novel07,MD02G1042800_novel02
Chr02	MD02G1042900	+	A3	3524365-3526077	MD02G1042900	MD02G1042900_novel01,MD02G1042900
Chr02	MD02G1048600	-	A3	3824412-3824410	MD02G1048600	MD02G1048600_novel01,MD02G1048600
Chr02	MD02G1048800	+	A3	3841979-3841983	MD02G1048800_novel03	MD02G1048800,MD02G1048800_novel01,MD02G1048800_novel02,MD02G1048800_novel03
Chr02	MD02G1056800	-	A3	4601706-4601691	MD02G1056800_novel05,MD02G1056800	MD02G1056800_novel01,MD02G1056800_novel05,MD02G1056800
Chr02	MD02G1057100	+	A3	4620352-4620366	MD02G1057100,MD02G1057100_novel03,MD02G1057100_novel01	MD02G1057100_novel02,MD02G1057100_novel04,MD02G1057100_novel01,MD02G1057100,MD02G1057100_novel03
Chr02	MD02G1057100	+	A3	4622183-4622234	MD02G1057100,MD02G1057100_novel02	MD02G1057100_novel03,MD02G1057100_novel02,MD02G1057100
Chr02	MD02G1058000	+	A3	4677261-4677266	MD02G1058000_novel02	MD02G1058000_novel01,MD02G1058000,MD02G1058000_novel02
Chr02	MD02G1060000	+	A3	4801235-4801383	MD02G1060000	MD02G1060000_novel01,MD02G1060000
Chr02	MD02G1060100	+	A3	4806853-4806890	MD02G1060100_novel04,MD02G1060100,MD02G1060100_novel03	MD02G1060100_novel01,MD02G1060100_novel02,MD02G1060100_novel04,MD02G1060100,MD02G1060100_novel03
Chr02	MD02G1060100	+	A3	4807984-4808001	MD02G1060100,MD02G1060100_novel02	MD02G1060100_novel01,MD02G1060100_novel04,MD02G1060100_novel03,MD02G1060100_novel02,MD02G1060100
Chr02	MD02G1060100	+	A3	4808712-4808716	MD02G1060100_novel01,MD02G1060100,MD02G1060100_novel03	MD02G1060100_novel02,MD02G1060100_novel01,MD02G1060100,MD02G1060100_novel03
Chr02	MD02G1061000	+	A3	4883708-4883750	MD02G1061000_novel01	MD02G1061000,MD02G1061000_novel01
Chr02	MD02G1064300	+	A3	5192741-5192747	MD02G1064300,MD02G1064300_novel05	MD02G1064300_novel01,MD02G1064300_novel02,MD02G1064300_novel03,MD02G1064300_novel04,MD02G1064300,MD02G1064300_novel05
Chr02	MD02G1064800	+	A3	5256827-5256868	MD02G1064800_novel04	MD02G1064800_novel01,MD02G1064800_novel03,MD02G1064800_novel05,MD02G1064800_novel02,MD02G1064800,MD02G1064800_novel06,MD02G1064800_novel07,MD02G1064800_novel08,MD02G1064800_novel09,MD02G1064800_novel10,MD02G1064800_novel04
Chr02	MD02G1067300	+	A3	5505267-5505286	MD02G1067300	MD02G1067300_novel01,MD02G1067300_novel02,MD02G1067300
Chr02	MD02G1069100	-	A3	5600233-5600227	MD02G1069100	MD02G1069100_novel01,MD02G1069100
Chr02	MD02G1069200	-	A3	5605738-5605575	MD02G1069200_novel01	MD02G1069200,MD02G1069200_novel02,MD02G1069200_novel01
Chr02	MD02G1070500	+	A3	5691070-5691073	MD02G1070500_novel01	MD02G1070500_novel02,MD02G1070500_novel01
Chr02	MD02G1070500	+	A3	5774184-5774185	MD02G1070500_novel02	MD02G1070500_novel12,MD02G1070500_novel02
Chr02	MD02G1072800	-	A3	5896092-5896089	MD02G1072800_novel01	MD02G1072800_novel02,MD02G1072800_novel01
Chr02	MD02G1073000	+	A3	5897053-5897074	MD02G1073000_novel01	MD02G1073000,MD02G1073000_novel02,MD02G1073000_novel01
Chr02	MD02G1073000	+	A3	5897431-5897435	MD02G1073000_novel02	MD02G1073000_novel01,MD02G1073000,MD02G1073000_novel02
Chr02	MD02G1073100	-	A3	5900664-5900589	MD02G1073100	MD02G1073100_novel02,MD02G1073100
Chr02	MD02G1073100	-	A3	5900672-5900589	MD02G1073100	MD02G1073100_novel01,MD02G1073100
Chr02	MD02G1073100	-	A3	5900672-5900664	MD02G1073100_novel02	MD02G1073100_novel01,MD02G1073100_novel02
Chr02	MD02G1073500	-	A3	5912816-5912813	MD02G1073500_novel04,MD02G1073500_novel01,MD02G1073500,MD02G1073500_novel02	MD02G1073500_novel03,MD02G1073500_novel01,MD02G1073500_novel04,MD02G1073500_novel02,MD02G1073500
Chr02	MD02G1075000	-	A3	5980131-5980120	MD02G1075000_novel07,MD02G1075000_novel02,MD02G1075000_novel03	MD02G1075000_novel04,MD02G1075000_novel08,MD02G1075000_novel09,MD02G1075000_novel05,MD02G1075000,MD02G1075000_novel07,MD02G1075000_novel02,MD02G1075000_novel03
Chr02	MD02G1075000	-	A3	5980575-5980564	MD02G1075000,MD02G1075000_novel06,MD02G1075000_novel04,MD02G1075000_novel02,MD02G1075000_novel03,MD02G1075000_novel01	MD02G1075000_novel07,MD02G1075000_novel10,MD02G1075000_novel05,MD02G1075000_novel02,MD02G1075000_novel04,MD02G1075000_novel01,MD02G1075000_novel03,MD02G1075000_novel06,MD02G1075000
Chr02	MD02G1076100	+	A3	6030746-6030752	MD02G1076100	MD02G1076100_novel02,MD02G1076100_novel03,MD02G1076100
Chr02	MD02G1077400	-	A3	6095244-6094555	MD02G1077400	MD02G1077400_novel01,MD02G1077400
Chr02	MD02G1077800	-	A3	6108055-6108029	MD02G1077800_novel01,MD02G1077800	MD02G1077800_novel02,MD02G1077800_novel01,MD02G1077800
Chr02	MD02G1079200	+	A3	6237237-6237252	MD02G1079200_novel06	MD02G1079200,MD02G1079200_novel02,MD02G1079200_novel03,MD02G1079200_novel04,MD02G1079200_novel05,MD02G1079200_novel07,MD02G1079200_novel08,MD02G1079200_novel09,MD02G1079200_novel10,MD02G1079200_novel11,MD02G1079200_novel06
Chr02	MD02G1080200	-	A3	6316011-6315993	MD02G1080200_novel01	MD02G1080200,MD02G1080200_novel01
Chr02	MD02G1081800	-	A3	6415368-6415344	MD02G1081800_novel01	MD02G1081800_novel03,MD02G1081800_novel02,MD02G1081800_novel04,MD02G1081800_novel05,MD02G1081800_novel06,MD02G1081800_novel01
Chr02	MD02G1082400	+	A3	6452902-6452923	MD02G1082400_novel02,MD02G1082400_novel03,MD02G1082400_novel04,MD02G1082400_novel05,MD02G1082400	MD02G1082400_novel01,MD02G1082400,MD02G1082400_novel02,MD02G1082400_novel03,MD02G1082400_novel04,MD02G1082400_novel05
Chr02	MD02G1082600	-	A3	6464670-6464632	MD02G1082600_novel01	MD02G1082600,MD02G1082600_novel01
Chr02	MD02G1082900	+	A3	6481026-6481030	MD02G1082900	MD02G1082900_novel01,MD02G1082900
Chr02	MD02G1084500	+	A3	6654736-6654751	MD02G1084500_novel03	MD02G1084500_novel02,MD02G1084500,MD02G1084500_novel04,MD02G1084500_novel05,MD02G1084500_novel06,MD02G1084500_novel07,MD02G1084500_novel03
Chr02	MD02G1084600	+	A3	6662374-6662498	MD02G1084600_novel02	MD02G1084600_novel04,MD02G1084600_novel02
Chr02	MD02G1084600	+	A3	6663528-6663532	MD02G1084600_novel04,MD02G1084600_novel02	MD02G1084600_novel01,MD02G1084600,MD02G1084600_novel02,MD02G1084600_novel04
Chr02	MD02G1086100	-	A3	6756460-6756367	MD02G1086100	MD02G1086100_novel01,MD02G1086100
Chr02	MD02G1086500	+	A3	6780858-6780863	MD02G1086500_novel01	MD02G1086500,MD02G1086500_novel01
Chr02	MD02G1088400	-	A3	6965521-6965519	MD02G1088400	MD02G1088400_novel01,MD02G1088400
Chr02	MD02G1088500	+	A3	6974753-6974806	MD02G1088500_novel03,MD02G1088500,MD02G1088500_novel01,MD02G1088500_novel05,MD02G1088500_novel04,MD02G1088500_novel02	MD02G1088500_novel06,MD02G1088500_novel07,MD02G1088500,MD02G1088500_novel01,MD02G1088500_novel03,MD02G1088500_novel04,MD02G1088500_novel02,MD02G1088500_novel05
Chr02	MD02G1088500	+	A3	6979257-6979277	MD02G1088500_novel03	MD02G1088500,MD02G1088500_novel01,MD02G1088500_novel04,MD02G1088500_novel02,MD02G1088500_novel05,MD02G1088500_novel06,MD02G1088500_novel08,MD02G1088500_novel09,MD02G1088500_novel10,MD02G1088500_novel11,MD02G1088500_novel03
Chr02	MD02G1090400	+	A3	7160227-7160259	MD02G1090400_novel02,MD02G1090400_novel01	MD02G1090400_novel03,MD02G1090400_novel01,MD02G1090400_novel02
Chr02	MD02G1093900	+	A3	7471078-7471080	MD02G1093900	MD02G1093900_novel01,MD02G1093900
Chr02	MD02G1094300	+	A3	7485485-7485508	MD02G1094300_novel01	MD02G1094300,MD02G1094300_novel01
Chr02	MD02G1094600	-	A3	7499468-7499461	MD02G1094600_novel01	MD02G1094600,MD02G1094600_novel02,MD02G1094600_novel01
Chr02	MD02G1095700	+	A3	7554984-7555120	MD02G1095700	MD02G1095700_novel02,MD02G1095700_novel01,MD02G1095700
Chr02	MD02G1096600	+	A3	7630728-7630758	MD02G1096600_novel01	MD02G1096600,MD02G1096600_novel01
Chr02	MD02G1096700	-	A3	7635897-7635866	MD02G1096700_novel03	MD02G1096700,MD02G1096700_novel01,MD02G1096700_novel05,MD02G1096700_novel09,MD02G1096700_novel08,MD02G1096700_novel07,MD02G1096700_novel04,MD02G1096700_novel06,MD02G1096700_novel02,MD02G1096700_novel03
Chr02	MD02G1096700	-	A3	7637095-7637081	MD02G1096700_novel06,MD02G1096700_novel07,MD02G1096700_novel05,MD02G1096700_novel03,MD02G1096700_novel01,MD02G1096700,MD02G1096700_novel08	MD02G1096700_novel04,MD02G1096700_novel02,MD02G1096700,MD02G1096700_novel01,MD02G1096700_novel05,MD02G1096700_novel08,MD02G1096700_novel03,MD02G1096700_novel07,MD02G1096700_novel06
Chr02	MD02G1096800	-	A3	7661038-7660987	MD02G1096800_novel02	MD02G1096800_novel01,MD02G1096800_novel02
Chr02	MD02G1096800	-	A3	7661069-7660987	MD02G1096800_novel02	MD02G1096800,MD02G1096800_novel04,MD02G1096800_novel02
Chr02	MD02G1096800	-	A3	7661069-7661038	MD02G1096800_novel01	MD02G1096800,MD02G1096800_novel04,MD02G1096800_novel01
Chr02	MD02G1096900	+	A3	7665178-7665190	MD02G1096900	MD02G1096900_novel02,MD02G1096900
Chr02	MD02G1097200	+	A3	7676983-7677073	MD02G1097200_novel04	MD02G1097200,MD02G1097200_novel01,MD02G1097200_novel05,MD02G1097200_novel03,MD02G1097200_novel02,MD02G1097200_novel06,MD02G1097200_novel04
Chr02	MD02G1097200	+	A3	7680861-7680868	MD02G1097200_novel02	MD02G1097200_novel01,MD02G1097200_novel02
Chr02	MD02G1097200	+	A3	7680861-7680884	MD02G1097200_novel08,MD02G1097200,MD02G1097200_novel06,MD02G1097200_novel07	MD02G1097200_novel01,MD02G1097200,MD02G1097200_novel06,MD02G1097200_novel07,MD02G1097200_novel08
Chr02	MD02G1097200	+	A3	7680868-7680884	MD02G1097200_novel08,MD02G1097200,MD02G1097200_novel06,MD02G1097200_novel07	MD02G1097200_novel02,MD02G1097200,MD02G1097200_novel06,MD02G1097200_novel07,MD02G1097200_novel08
Chr02	MD02G1099100	-	A3	7861169-7861037	MD02G1099100_novel01	MD02G1099100,MD02G1099100_novel01
Chr02	MD02G1100300	+	A3	7990699-7990745	MD02G1100300_novel01	MD02G1100300,MD02G1100300_novel02,MD02G1100300_novel01
Chr02	MD02G1102700	+	A3	8242952-8243031	MD02G1102700	MD02G1102700_novel01,MD02G1102700
Chr02	MD02G1102900	+	A3	8249349-8249365	MD02G1102900_novel01	MD02G1102900,MD02G1102900_novel01
Chr02	MD02G1103900	+	A3	8298552-8298559	MD02G1103900,MD02G1103900_novel05,MD02G1103900_novel04	MD02G1103900_novel02,MD02G1103900,MD02G1103900_novel04,MD02G1103900_novel05
Chr02	MD02G1103900	+	A3	8298552-8298584	MD02G1103900_novel01,MD02G1103900_novel03	MD02G1103900_novel02,MD02G1103900_novel01,MD02G1103900_novel03
Chr02	MD02G1103900	+	A3	8298559-8298584	MD02G1103900_novel01,MD02G1103900_novel03	MD02G1103900,MD02G1103900_novel04,MD02G1103900_novel05,MD02G1103900_novel01,MD02G1103900_novel03
Chr02	MD02G1103900	+	A3	8299628-8299631	MD02G1103900	MD02G1103900_novel02,MD02G1103900_novel01,MD02G1103900_novel04,MD02G1103900_novel05,MD02G1103900_novel06,MD02G1103900_novel07,MD02G1103900
Chr02	MD02G1103900	+	A3	8299628-8299717	MD02G1103900_novel03	MD02G1103900_novel02,MD02G1103900_novel01,MD02G1103900_novel04,MD02G1103900_novel05,MD02G1103900_novel06,MD02G1103900_novel07,MD02G1103900_novel03
Chr02	MD02G1103900	+	A3	8299631-8299717	MD02G1103900_novel03	MD02G1103900,MD02G1103900_novel03
Chr02	MD02G1104100	+	A3	8346829-8346847	MD02G1104100	MD02G1104100_novel01,MD02G1104100
Chr02	MD02G1105600	-	A3	8554794-8554791	MD02G1105600_novel13	MD02G1105600_novel06,MD02G1105600,MD02G1105600_novel14,MD02G1105600_novel10,MD02G1105600_novel08,MD02G1105600_novel12,MD02G1105600_novel11,MD02G1105600_novel02,MD02G1105600_novel04,MD02G1105600_novel13
Chr02	MD02G1105600	-	A3	8555653-8555650	MD02G1105600_novel04	MD02G1105600_novel06,MD02G1105600,MD02G1105600_novel10,MD02G1105600_novel08,MD02G1105600_novel12,MD02G1105600_novel11,MD02G1105600_novel02,MD02G1105600_novel13,MD02G1105600_novel04
Chr02	MD02G1105600	-	A3	8559844-8559819	MD02G1105600_novel02	MD02G1105600_novel06,MD02G1105600,MD02G1105600_novel08,MD02G1105600_novel04,MD02G1105600_novel07,MD02G1105600_novel09,MD02G1105600_novel03,MD02G1105600_novel05,MD02G1105600_novel02
Chr02	MD02G1105600	-	A3	8564093-8564075	MD02G1105600_novel04	MD02G1105600,MD02G1105600_novel02,MD02G1105600_novel03,MD02G1105600_novel01,MD02G1105600_novel04
Chr02	MD02G1106300	+	A3	8608476-8608485	MD02G1106300_novel09	MD02G1106300_novel01,MD02G1106300_novel02,MD02G1106300,MD02G1106300_novel03,MD02G1106300_novel04,MD02G1106300_novel06,MD02G1106300_novel07,MD02G1106300_novel08,MD02G1106300_novel09
Chr02	MD02G1106900	-	A3	8645346-8645123	MD02G1106900	MD02G1106900_novel01,MD02G1106900
Chr02	MD02G1107900	+	A3	8717963-8717983	MD02G1107900_novel01,MD02G1107900_novel02	MD02G1107900,MD02G1107900_novel02,MD02G1107900_novel01
Chr02	MD02G1110900	-	A3	9018530-9018499	MD02G1110900_novel02	MD02G1110900,MD02G1110900_novel02
Chr02	MD02G1111100	-	A3	9020983-9020980	MD02G1111100	MD02G1111100_novel02,MD02G1111100_novel01,MD02G1111100_novel03,MD02G1111100
Chr02	MD02G1113500	-	A3	9220087-9220000	MD02G1113500_novel02	MD02G1113500,MD02G1113500_novel01,MD02G1113500_novel02
Chr02	MD02G1113500	-	A3	9220252-9220242	MD02G1113500_novel01	MD02G1113500,MD02G1113500_novel02,MD02G1113500_novel01
Chr02	MD02G1113800	+	A3	9257497-9257519	MD02G1113800_novel02	MD02G1113800_novel01,MD02G1113800_novel03,MD02G1113800_novel04,MD02G1113800_novel02
Chr02	MD02G1113800	+	A3	9258334-9258547	MD02G1113800_novel03	MD02G1113800_novel04,MD02G1113800_novel03
Chr02	MD02G1114700	+	A3	9321143-9321157	MD02G1114700_novel01	MD02G1114700,MD02G1114700_novel03,MD02G1114700_novel01
Chr02	MD02G1114700	+	A3	9322621-9322632	MD02G1114700_novel02,MD02G1114700_novel01,MD02G1114700	MD02G1114700_novel03,MD02G1114700,MD02G1114700_novel01,MD02G1114700_novel02
Chr02	MD02G1114700	+	A3	9325301-9325304	MD02G1114700	MD02G1114700_novel01,MD02G1114700_novel02,MD02G1114700_novel03,MD02G1114700_novel04,MD02G1114700
Chr02	MD02G1117600	+	A3	9573454-9574084	MD02G1117600	MD02G1117600_novel01,MD02G1117600
Chr02	MD02G1119000	+	A3	9651517-9651522	MD02G1119000_novel01	MD02G1119000,MD02G1119000_novel03,MD02G1119000_novel02,MD02G1119000_novel01
Chr02	MD02G1121800	-	A3	9923926-9923922	MD02G1121800_novel02	MD02G1121800,MD02G1121800_novel02
Chr02	MD02G1121800	-	A3	9923931-9923922	MD02G1121800_novel02	MD02G1121800_novel03,MD02G1121800_novel01,MD02G1121800_novel02
Chr02	MD02G1121800	-	A3	9923931-9923926	MD02G1121800	MD02G1121800_novel03,MD02G1121800_novel01,MD02G1121800
Chr02	MD02G1123000	-	A3	10005287-10004826	MD02G1123000	MD02G1123000_novel02,MD02G1123000
Chr02	MD02G1123100	-	A3	10012413-10012409	MD02G1123100_novel03	MD02G1123100,MD02G1123100_novel01,MD02G1123100_novel04,MD02G1123100_novel05,MD02G1123100_novel02,MD02G1123100_novel03
Chr02	MD02G1123700	-	A3	10066348-10066286	MD02G1123700_novel01	MD02G1123700,MD02G1123700_novel02,MD02G1123700_novel03,MD02G1123700_novel01
Chr02	MD02G1124100	-	A3	10105664-10105614	MD02G1124100_novel04	MD02G1124100,MD02G1124100_novel05,MD02G1124100_novel08,MD02G1124100_novel03,MD02G1124100_novel09,MD02G1124100_novel01,MD02G1124100_novel04
Chr02	MD02G1124100	-	A3	10107301-10107296	MD02G1124100	MD02G1124100_novel01,MD02G1124100_novel02,MD02G1124100
Chr02	MD02G1124600	-	A3	10145112-10145093	MD02G1124600_novel03,MD02G1124600_novel02	MD02G1124600,MD02G1124600_novel01,MD02G1124600_novel03,MD02G1124600_novel02
Chr02	MD02G1126400	-	A3	10241594-10241564	MD02G1126400,MD02G1126400_novel01,MD02G1126400_novel02,MD02G1126400_novel04,MD02G1126400_novel06	MD02G1126400_novel03,MD02G1126400_novel06,MD02G1126400_novel01,MD02G1126400,MD02G1126400_novel04,MD02G1126400_novel02
Chr02	MD02G1126400	-	A3	10244104-10244025	MD02G1126400_novel01,MD02G1126400,MD02G1126400_novel04,MD02G1126400_novel03	MD02G1126400_novel02,MD02G1126400_novel01,MD02G1126400,MD02G1126400_novel04,MD02G1126400_novel03
Chr02	MD02G1129600	-	A3	10472571-10472553	MD02G1129600	MD02G1129600_novel02,MD02G1129600_novel03,MD02G1129600_novel04,MD02G1129600_novel01,MD02G1129600
Chr02	MD02G1131900	-	A3	10630989-10630984	MD02G1131900_novel01	MD02G1131900,MD02G1131900_novel01
Chr02	MD02G1132000	+	A3	10633356-10633423	MD02G1132000	MD02G1132000_novel01,MD02G1132000_novel02,MD02G1132000
Chr02	MD02G1134300	+	A3	10881030-10881033	MD02G1134300	MD02G1134300_novel01,MD02G1134300
Chr02	MD02G1134800	-	A3	10945087-10945066	MD02G1134800_novel01,MD02G1134800_novel03	MD02G1134800_novel02,MD02G1134800,MD02G1134800_novel03,MD02G1134800_novel01
Chr02	MD02G1137300	+	A3	11477484-11477510	MD02G1137300_novel01	MD02G1137300,MD02G1137300_novel01
Chr02	MD02G1138700	-	A3	11596031-11595990	MD02G1138700	MD02G1138700_novel01,MD02G1138700
Chr02	MD02G1147300	+	A3	12166497-12166517	MD02G1147300	MD02G1147300_novel01,MD02G1147300_novel02,MD02G1147300
Chr02	MD02G1147300	+	A3	12167268-12167324	MD02G1147300	MD02G1147300_novel01,MD02G1147300_novel02,MD02G1147300
Chr02	MD02G1151300	-	A3	12479725-12479586	MD02G1151300,MD02G1151300_novel02,MD02G1151300_novel04,MD02G1151300_novel05,MD02G1151300_novel12,MD02G1151300_novel11,MD02G1151300_novel09	MD02G1151300_novel06,MD02G1151300_novel05,MD02G1151300,MD02G1151300_novel02,MD02G1151300_novel04,MD02G1151300_novel12,MD02G1151300_novel11,MD02G1151300_novel09
Chr02	MD02G1151300	-	A3	12481321-12481318	MD02G1151300,MD02G1151300_novel09,MD02G1151300_novel11	MD02G1151300_novel05,MD02G1151300_novel07,MD02G1151300_novel08,MD02G1151300_novel01,MD02G1151300_novel03,MD02G1151300_novel02,MD02G1151300_novel04,MD02G1151300_novel06,MD02G1151300_novel10,MD02G1151300,MD02G1151300_novel11,MD02G1151300_novel09
Chr02	MD02G1151300	-	A3	12481631-12481492	MD02G1151300_novel09	MD02G1151300_novel04,MD02G1151300_novel09
Chr02	MD02G1151300	-	A3	12482214-12482202	MD02G1151300_novel10	MD02G1151300_novel05,MD02G1151300,MD02G1151300_novel07,MD02G1151300_novel01,MD02G1151300_novel03,MD02G1151300_novel02,MD02G1151300_novel04,MD02G1151300_novel11,MD02G1151300_novel06,MD02G1151300_novel09,MD02G1151300_novel10
Chr02	MD02G1154300	-	A3	12798875-12798371	MD02G1154300_novel02,MD02G1154300_novel05	MD02G1154300_novel03,MD02G1154300_novel05,MD02G1154300_novel02
Chr02	MD02G1157100	+	A3	13142858-13142873	MD02G1157100,MD02G1157100_novel01,MD02G1157100_novel03	MD02G1157100_novel02,MD02G1157100,MD02G1157100_novel01,MD02G1157100_novel03
Chr02	MD02G1157100	+	A3	13143171-13143175	MD02G1157100,MD02G1157100_novel01,MD02G1157100_novel03	MD02G1157100_novel02,MD02G1157100,MD02G1157100_novel01,MD02G1157100_novel03
Chr02	MD02G1159300	-	A3	13372034-13372031	MD02G1159300	MD02G1159300_novel02,MD02G1159300_novel01,MD02G1159300
Chr02	MD02G1161700	+	A3	13580556-13580567	MD02G1161700_novel02,MD02G1161700_novel01,MD02G1161700_novel05,MD02G1161700_novel04	MD02G1161700,MD02G1161700_novel03,MD02G1161700_novel01,MD02G1161700_novel02,MD02G1161700_novel04,MD02G1161700_novel05
Chr02	MD02G1161700	+	A3	13582420-13582479	MD02G1161700_novel04	MD02G1161700_novel02,MD02G1161700_novel04
Chr02	MD02G1161700	+	A3	13582420-13583249	MD02G1161700_novel03,MD02G1161700_novel01,MD02G1161700,MD02G1161700_novel07	MD02G1161700_novel02,MD02G1161700,MD02G1161700_novel01,MD02G1161700_novel03,MD02G1161700_novel07
Chr02	MD02G1163500	+	A3	13947039-13947099	MD02G1163500_novel02	MD02G1163500_novel01,MD02G1163500_novel02
Chr02	MD02G1169200	+	A3	14532801-14532823	MD02G1169200_novel02,MD02G1169200_novel01,MD02G1169200_novel03	MD02G1169200,MD02G1169200_novel03,MD02G1169200_novel02,MD02G1169200_novel01
Chr02	MD02G1169200	+	A3	14534390-14534426	MD02G1169200_novel03,MD02G1169200_novel01,MD02G1169200_novel04	MD02G1169200_novel02,MD02G1169200,MD02G1169200_novel05,MD02G1169200_novel03,MD02G1169200_novel01,MD02G1169200_novel04
Chr02	MD02G1169900	-	A3	14688004-14687993	MD02G1169900_novel02,MD02G1169900	MD02G1169900_novel03,MD02G1169900_novel01,MD02G1169900,MD02G1169900_novel02
Chr02	MD02G1169900	-	A3	14689382-14689378	MD02G1169900_novel02,MD02G1169900_novel03	MD02G1169900,MD02G1169900_novel03,MD02G1169900_novel02
Chr02	MD02G1172600	-	A3	15078109-15078099	MD02G1172600_novel03	MD02G1172600,MD02G1172600_novel01,MD02G1172600_novel04,MD02G1172600_novel02,MD02G1172600_novel06,MD02G1172600_novel07,MD02G1172600_novel05,MD02G1172600_novel09,MD02G1172600_novel08,MD02G1172600_novel03
Chr02	MD02G1172600	-	A3	15081060-15081039	MD02G1172600_novel04,MD02G1172600_novel02,MD02G1172600_novel03,MD02G1172600_novel01,MD02G1172600,MD02G1172600_novel08	MD02G1172600_novel07,MD02G1172600,MD02G1172600_novel01,MD02G1172600_novel03,MD02G1172600_novel04,MD02G1172600_novel02,MD02G1172600_novel08
Chr02	MD02G1175900	-	A3	15462606-15462602	MD02G1175900	MD02G1175900_novel01,MD02G1175900
Chr02	MD02G1176300	-	A3	15560357-15560339	MD02G1176300	MD02G1176300_novel01,MD02G1176300
Chr02	MD02G1178800	-	A3	15833872-15833820	MD02G1178800_novel02,MD02G1178800_novel01	MD02G1178800,MD02G1178800_novel03,MD02G1178800_novel02,MD02G1178800_novel01
Chr02	MD02G1179100	-	A3	15877370-15877363	MD02G1179100_novel01	MD02G1179100,MD02G1179100_novel02,MD02G1179100_novel01
Chr02	MD02G1179200	-	A3	15885214-15885202	MD02G1179200	MD02G1179200_novel01,MD02G1179200
Chr02	MD02G1180600	+	A3	16198448-16198465	MD02G1180600	MD02G1180600_novel01,MD02G1180600_novel03,MD02G1180600
Chr02	MD02G1181200	-	A3	16285080-16285078	MD02G1181200_novel07,MD02G1181200_novel08,MD02G1181200_novel18,MD02G1181200_novel17,MD02G1181200_novel06,MD02G1181200_novel14,MD02G1181200_novel13,MD02G1181200_novel12,MD02G1181200_novel11,MD02G1181200_novel03,MD02G1181200,MD02G1181200_novel15	MD02G1181200_novel09,MD02G1181200_novel03,MD02G1181200_novel07,MD02G1181200_novel06,MD02G1181200_novel18,MD02G1181200,MD02G1181200_novel15,MD02G1181200_novel08,MD02G1181200_novel11,MD02G1181200_novel14,MD02G1181200_novel12,MD02G1181200_novel17,MD02G1181200_novel13
Chr02	MD02G1181200	-	A3	16287139-16287136	MD02G1181200_novel08	MD02G1181200_novel03,MD02G1181200_novel07,MD02G1181200_novel06,MD02G1181200_novel18,MD02G1181200,MD02G1181200_novel15,MD02G1181200_novel04,MD02G1181200_novel02,MD02G1181200_novel19,MD02G1181200_novel11,MD02G1181200_novel14,MD02G1181200_novel09,MD02G1181200_novel01,MD02G1181200_novel12,MD02G1181200_novel17,MD02G1181200_novel10,MD02G1181200_novel13,MD02G1181200_novel16,MD02G1181200_novel05,MD02G118…
Chr02	MD02G1181200	-	A3	16290802-16290798	MD02G1181200_novel12	MD02G1181200_novel03,MD02G1181200_novel07,MD02G1181200_novel06,MD02G1181200_novel18,MD02G1181200,MD02G1181200_novel15,MD02G1181200_novel08,MD02G1181200_novel04,MD02G1181200_novel02,MD02G1181200_novel11,MD02G1181200_novel14,MD02G1181200_novel09,MD02G1181200_novel01,MD02G1181200_novel17,MD02G1181200_novel10,MD02G1181200_novel13,MD02G1181200_novel16,MD02G1181200_novel05,MD02G1181200_novel12
Chr02	MD02G1181200	-	A3	16293294-16293266	MD02G1181200_novel08,MD02G1181200_novel02	MD02G1181200_novel03,MD02G1181200_novel07,MD02G1181200_novel06,MD02G1181200,MD02G1181200_novel15,MD02G1181200_novel04,MD02G1181200_novel11,MD02G1181200_novel14,MD02G1181200_novel09,MD02G1181200_novel01,MD02G1181200_novel12,MD02G1181200_novel17,MD02G1181200_novel10,MD02G1181200_novel13,MD02G1181200_novel16,MD02G1181200_novel05,MD02G1181200_novel08,MD02G1181200_novel02
Chr02	MD02G1182800	-	A3	16484673-16484592	MD02G1182800	MD02G1182800_novel01,MD02G1182800
Chr02	MD02G1183300	-	A3	16577610-16577499	MD02G1183300,MD02G1183300_novel02	MD02G1183300_novel01,MD02G1183300,MD02G1183300_novel02
Chr02	MD02G1184400	-	A3	16707119-16707098	MD02G1184400_novel02	MD02G1184400,MD02G1184400_novel02
Chr02	MD02G1186000	+	A3	16900562-16900580	MD02G1186000_novel01	MD02G1186000,MD02G1186000_novel02,MD02G1186000_novel03,MD02G1186000_novel04,MD02G1186000_novel05,MD02G1186000_novel01
Chr02	MD02G1186200	-	A3	16933352-16933267	MD02G1186200_novel01	MD02G1186200,MD02G1186200_novel01
Chr02	MD02G1186900	-	A3	17010947-17010932	MD02G1186900_novel02	MD02G1186900,MD02G1186900_novel02
Chr02	MD02G1186900	-	A3	17010962-17010932	MD02G1186900_novel02	MD02G1186900_novel01,MD02G1186900_novel03,MD02G1186900_novel02
Chr02	MD02G1186900	-	A3	17010962-17010947	MD02G1186900	MD02G1186900_novel01,MD02G1186900_novel03,MD02G1186900
Chr02	MD02G1187100	-	A3	17023955-17023908	MD02G1187100_novel04	MD02G1187100_novel09,MD02G1187100_novel08,MD02G1187100_novel05,MD02G1187100_novel01,MD02G1187100_novel06,MD02G1187100_novel03,MD02G1187100_novel07,MD02G1187100_novel02,MD02G1187100,MD02G1187100_novel04
Chr02	MD02G1187100	-	A3	17025094-17025084	MD02G1187100_novel02	MD02G1187100_novel09,MD02G1187100_novel04,MD02G1187100_novel08,MD02G1187100_novel05,MD02G1187100_novel01,MD02G1187100_novel03,MD02G1187100_novel07,MD02G1187100,MD02G1187100_novel02
Chr02	MD02G1187100	-	A3	17027372-17027358	MD02G1187100_novel07,MD02G1187100_novel06,MD02G1187100_novel01,MD02G1187100_novel02,MD02G1187100	MD02G1187100_novel03,MD02G1187100_novel01,MD02G1187100_novel06,MD02G1187100_novel07,MD02G1187100_novel02,MD02G1187100
Chr02	MD02G1187800	+	A3	17166192-17166243	MD02G1187800_novel01	MD02G1187800,MD02G1187800_novel01
Chr02	MD02G1190200	+	A3	17530699-17530702	MD02G1190200_novel04	MD02G1190200_novel01,MD02G1190200,MD02G1190200_novel02,MD02G1190200_novel03,MD02G1190200_novel04
Chr02	MD02G1190300	+	A3	17545340-17545387	MD02G1190300	MD02G1190300_novel01,MD02G1190300
Chr02	MD02G1190600	+	A3	17604493-17604501	MD02G1190600_novel02	MD02G1190600,MD02G1190600_novel04,MD02G1190600_novel01,MD02G1190600_novel03,MD02G1190600_novel02
Chr02	MD02G1190600	+	A3	17605179-17605194	MD02G1190600_novel02,MD02G1190600,MD02G1190600_novel04,MD02G1190600_novel03	MD02G1190600_novel01,MD02G1190600,MD02G1190600_novel04,MD02G1190600_novel02,MD02G1190600_novel03
Chr02	MD02G1191100	-	A3	17759365-17759362	MD02G1191100,MD02G1191100_novel01	MD02G1191100_novel03,MD02G1191100,MD02G1191100_novel01
Chr02	MD02G1191100	-	A3	17759374-17759362	MD02G1191100,MD02G1191100_novel01	MD02G1191100_novel02,MD02G1191100,MD02G1191100_novel01
Chr02	MD02G1191100	-	A3	17759374-17759365	MD02G1191100_novel03	MD02G1191100_novel02,MD02G1191100_novel03
Chr02	MD02G1195500	+	A3	18721487-18721540	MD02G1195500,MD02G1195500_novel01	MD02G1195500_novel02,MD02G1195500_novel01,MD02G1195500
Chr02	MD02G1195500	+	A3	18722052-18722086	MD02G1195500_novel01	MD02G1195500_novel02,MD02G1195500,MD02G1195500_novel01
Chr02	MD02G1196300	-	A3	18852207-18851904	MD02G1196300_novel01	MD02G1196300_novel02,MD02G1196300_novel01
Chr02	MD02G1196600	+	A3	18889852-18889867	MD02G1196600	MD02G1196600_novel01,MD02G1196600
Chr02	MD02G1197300	+	A3	19060941-19060982	MD02G1197300_novel01,MD02G1197300_novel03,MD02G1197300	MD02G1197300_novel04,MD02G1197300_novel03,MD02G1197300_novel01,MD02G1197300
Chr02	MD02G1197300	+	A3	19060941-19060984	MD02G1197300_novel02	MD02G1197300_novel04,MD02G1197300_novel02
Chr02	MD02G1197300	+	A3	19060982-19060984	MD02G1197300_novel02	MD02G1197300_novel03,MD02G1197300_novel01,MD02G1197300,MD02G1197300_novel02
Chr02	MD02G1197800	+	A3	19161664-19161690	MD02G1197800	MD02G1197800_novel01,MD02G1197800
Chr02	MD02G1198200	-	A3	19298339-19298318	MD02G1198200	MD02G1198200_novel01,MD02G1198200
Chr02	MD02G1199600	+	A3	19636282-19636305	MD02G1199600_novel01	MD02G1199600,MD02G1199600_novel01
Chr02	MD02G1201400	+	A3	19904041-19904071	MD02G1201400_novel02	MD02G1201400_novel01,MD02G1201400,MD02G1201400_novel03,MD02G1201400_novel02
Chr02	MD02G1201400	+	A3	19907838-19907841	MD02G1201400_novel03,MD02G1201400_novel02,MD02G1201400,MD02G1201400_novel04	MD02G1201400_novel01,MD02G1201400,MD02G1201400_novel03,MD02G1201400_novel02,MD02G1201400_novel04
Chr02	MD02G1201600	-	A3	19923123-19923108	MD02G1201600,MD02G1201600_novel02	MD02G1201600_novel01,MD02G1201600_novel02,MD02G1201600
Chr02	MD02G1204000	+	A3	20383881-20383912	MD02G1204000	MD02G1204000_novel01,MD02G1204000
Chr02	MD02G1207800	+	A3	21019107-21019110	MD02G1207800_novel02,MD02G1207800_novel04,MD02G1207800_novel07	MD02G1207800_novel01,MD02G1207800,MD02G1207800_novel06,MD02G1207800_novel03,MD02G1207800_novel05,MD02G1207800_novel08,MD02G1207800_novel02,MD02G1207800_novel04,MD02G1207800_novel07
Chr02	MD02G1207800	+	A3	21022728-21022758	MD02G1207800_novel05	MD02G1207800_novel01,MD02G1207800,MD02G1207800_novel02,MD02G1207800_novel04,MD02G1207800_novel06,MD02G1207800_novel07,MD02G1207800_novel08,MD02G1207800_novel05
Chr02	MD02G1207800	+	A3	21022728-21022772	MD02G1207800_novel03	MD02G1207800_novel01,MD02G1207800,MD02G1207800_novel02,MD02G1207800_novel04,MD02G1207800_novel06,MD02G1207800_novel07,MD02G1207800_novel08,MD02G1207800_novel03
Chr02	MD02G1207800	+	A3	21022758-21022772	MD02G1207800_novel03	MD02G1207800_novel05,MD02G1207800_novel03
Chr02	MD02G1210100	-	A3	21760031-21759615	MD02G1210100,MD02G1210100_novel08,MD02G1210100_novel05,MD02G1210100_novel07,MD02G1210100_novel01,MD02G1210100_novel02	MD02G1210100_novel03,MD02G1210100,MD02G1210100_novel08,MD02G1210100_novel01,MD02G1210100_novel02,MD02G1210100_novel07,MD02G1210100_novel05
Chr02	MD02G1210100	-	A3	21762350-21762345	MD02G1210100	MD02G1210100_novel08,MD02G1210100_novel01,MD02G1210100_novel02,MD02G1210100_novel03,MD02G1210100_novel06,MD02G1210100_novel09,MD02G1210100_novel04,MD02G1210100_novel07,MD02G1210100_novel05,MD02G1210100
Chr02	MD02G1210300	-	A3	21859404-21859391	MD02G1210300	MD02G1210300_novel01,MD02G1210300_novel02,MD02G1210300
Chr02	MD02G1210300	-	A3	21860441-21860396	MD02G1210300_novel02,MD02G1210300	MD02G1210300_novel01,MD02G1210300_novel02,MD02G1210300
Chr02	MD02G1211000	-	A3	22193539-22193528	MD02G1211000_novel01	MD02G1211000_novel06,MD02G1211000,MD02G1211000_novel04,MD02G1211000_novel05,MD02G1211000_novel01
Chr02	MD02G1211700	-	A3	22644162-22644142	MD02G1211700	MD02G1211700_novel01,MD02G1211700
Chr02	MD02G1212400	+	A3	22761019-22761232	MD02G1212400	MD02G1212400_novel01,MD02G1212400
Chr02	MD02G1212800	+	A3	22880258-22880433	MD02G1212800_novel02,MD02G1212800	MD02G1212800_novel01,MD02G1212800,MD02G1212800_novel02
Chr02	MD02G1213500	+	A3	23303814-23303838	MD02G1213500_novel01	MD02G1213500,MD02G1213500_novel06,MD02G1213500_novel09,MD02G1213500_novel10,MD02G1213500_novel02,MD02G1213500_novel12,MD02G1213500_novel05,MD02G1213500_novel03,MD02G1213500_novel07,MD02G1213500_novel04,MD02G1213500_novel01
Chr02	MD02G1214300	+	A3	23823943-23824027	MD02G1214300_novel02	MD02G1214300,MD02G1214300_novel04,MD02G1214300_novel05,MD02G1214300_novel06,MD02G1214300_novel07,MD02G1214300_novel08,MD02G1214300_novel02
Chr02	MD02G1214300	+	A3	23824815-23824854	MD02G1214300_novel06	MD02G1214300,MD02G1214300_novel02,MD02G1214300_novel04,MD02G1214300_novel05,MD02G1214300_novel08,MD02G1214300_novel06
Chr02	MD02G1217000	+	A3	24884240-24884416	MD02G1217000_novel04,MD02G1217000,MD02G1217000_novel03	MD02G1217000_novel05,MD02G1217000,MD02G1217000_novel03,MD02G1217000_novel04
Chr02	MD02G1217800	+	A3	25300237-25300267	MD02G1217800	MD02G1217800_novel02,MD02G1217800
Chr02	MD02G1218100	-	A3	25348462-25347865	MD02G1218100_novel06	MD02G1218100_novel05,MD02G1218100_novel06
Chr02	MD02G1218100	-	A3	25350576-25350560	MD02G1218100_novel05	MD02G1218100_novel04,MD02G1218100_novel02,MD02G1218100_novel07,MD02G1218100,MD02G1218100_novel03,MD02G1218100_novel06,MD02G1218100_novel05
Chr02	MD02G1222000	-	A3	25897061-25897031	MD02G1222000_novel04	MD02G1222000_novel01,MD02G1222000,MD02G1222000_novel03,MD02G1222000_novel05,MD02G1222000_novel06,MD02G1222000_novel02,MD02G1222000_novel04
Chr02	MD02G1223100	-	A3	26032489-26032481	MD02G1223100	MD02G1223100_novel02,MD02G1223100_novel01,MD02G1223100
Chr02	MD02G1225300	-	A3	26410156-26410132	MD02G1225300_novel01	MD02G1225300,MD02G1225300_novel01
Chr02	MD02G1226800	+	A3	26722822-26722825	MD02G1226800_novel01	MD02G1226800,MD02G1226800_novel02,MD02G1226800_novel01
Chr02	MD02G1231000	-	A3	27695533-27695510	MD02G1231000,MD02G1231000_novel01,MD02G1231000_novel03	MD02G1231000_novel02,MD02G1231000,MD02G1231000_novel01,MD02G1231000_novel03
Chr02	MD02G1232700	+	A3	27898646-27898656	MD02G1232700_novel03	MD02G1232700_novel01,MD02G1232700_novel02,MD02G1232700_novel04,MD02G1232700,MD02G1232700_novel03
Chr02	MD02G1232800	-	A3	27902227-27901646	MD02G1232800_novel01	MD02G1232800,MD02G1232800_novel01
Chr02	MD02G1239100	-	A3	28680826-28680813	MD02G1239100_novel01	MD02G1239100,MD02G1239100_novel02,MD02G1239100_novel01
Chr02	MD02G1241600	+	A3	29027745-29027755	MD02G1241600,MD02G1241600_novel03	MD02G1241600_novel02,MD02G1241600,MD02G1241600_novel03
Chr02	MD02G1241600	+	A3	29027745-29027765	MD02G1241600_novel01	MD02G1241600_novel02,MD02G1241600_novel01
Chr02	MD02G1241600	+	A3	29027755-29027765	MD02G1241600_novel01	MD02G1241600,MD02G1241600_novel03,MD02G1241600_novel01
Chr02	MD02G1241800	+	A3	29165067-29165130	MD02G1241800_novel02,MD02G1241800_novel01	MD02G1241800,MD02G1241800_novel01,MD02G1241800_novel02
Chr02	MD02G1244600	-	A3	29461270-29461258	MD02G1244600_novel03	MD02G1244600,MD02G1244600_novel02,MD02G1244600_novel01,MD02G1244600_novel03
Chr02	MD02G1245300	+	A3	29565183-29565186	MD02G1245300	MD02G1245300_novel01,MD02G1245300
Chr02	MD02G1248400	+	A3	29929336-29929340	MD02G1248400,MD02G1248400_novel01	MD02G1248400_novel02,MD02G1248400_novel01,MD02G1248400
Chr02	MD02G1248400	+	A3	29930966-29930977	MD02G1248400_novel02	MD02G1248400_novel01,MD02G1248400,MD02G1248400_novel02
Chr02	MD02G1248400	+	A3	29932027-29932030	MD02G1248400,MD02G1248400_novel02,MD02G1248400_novel03	MD02G1248400_novel01,MD02G1248400,MD02G1248400_novel02,MD02G1248400_novel03
Chr02	MD02G1249900	-	A3	30090145-30090107	MD02G1249900_novel09	MD02G1249900_novel06,MD02G1249900_novel10,MD02G1249900_novel02,MD02G1249900_novel03,MD02G1249900_novel09
Chr02	MD02G1249900	-	A3	30092420-30092417	MD02G1249900_novel10,MD02G1249900_novel01,MD02G1249900,MD02G1249900_novel09,MD02G1249900_novel07	MD02G1249900_novel06,MD02G1249900_novel02,MD02G1249900_novel11,MD02G1249900_novel04,MD02G1249900_novel03,MD02G1249900_novel08,MD02G1249900_novel05,MD02G1249900_novel09,MD02G1249900_novel01,MD02G1249900,MD02G1249900_novel10,MD02G1249900_novel07
Chr02	MD02G1250400	+	A3	30201822-30201840	MD02G1250400_novel03	MD02G1250400,MD02G1250400_novel01,MD02G1250400_novel02,MD02G1250400_novel03
Chr02	MD02G1250800	-	A3	30243021-30243002	MD02G1250800_novel01,MD02G1250800_novel02	MD02G1250800_novel03,MD02G1250800_novel01,MD02G1250800_novel02
Chr02	MD02G1250800	-	A3	30243592-30243580	MD02G1250800_novel01,MD02G1250800_novel03	MD02G1250800_novel02,MD02G1250800_novel01,MD02G1250800_novel03
Chr02	MD02G1255800	-	A3	30779553-30779545	MD02G1255800_novel02,MD02G1255800	MD02G1255800_novel01,MD02G1255800_novel02,MD02G1255800
Chr02	MD02G1256900	+	A3	30935223-30935277	MD02G1256900_novel03	MD02G1256900,MD02G1256900_novel01,MD02G1256900_novel03
Chr02	MD02G1256900	+	A3	30935223-30935335	MD02G1256900_novel02	MD02G1256900,MD02G1256900_novel01,MD02G1256900_novel02
Chr02	MD02G1256900	+	A3	30935277-30935335	MD02G1256900_novel02	MD02G1256900_novel03,MD02G1256900_novel02
Chr02	MD02G1256900	+	A3	30940135-30940147	MD02G1256900_novel06,MD02G1256900_novel05,MD02G1256900_novel02,MD02G1256900_novel03,MD02G1256900	MD02G1256900_novel04,MD02G1256900,MD02G1256900_novel02,MD02G1256900_novel03,MD02G1256900_novel05,MD02G1256900_novel06
Chr02	MD02G1257300	+	A3	30964482-30964491	MD02G1257300_novel03	MD02G1257300,MD02G1257300_novel03
Chr02	MD02G1257800	+	A3	31060919-31060937	MD02G1257800_novel01,MD02G1257800_novel03,MD02G1257800_novel04,MD02G1257800	MD02G1257800_novel02,MD02G1257800,MD02G1257800_novel01,MD02G1257800_novel03,MD02G1257800_novel04
Chr02	MD02G1259200	+	A3	31270462-31270741	MD02G1259200_novel06,MD02G1259200_novel07,MD02G1259200_novel02,MD02G1259200,MD02G1259200_novel08	MD02G1259200_novel01,MD02G1259200,MD02G1259200_novel02,MD02G1259200_novel06,MD02G1259200_novel07,MD02G1259200_novel08
Chr02	MD02G1259200	+	A3	31270949-31271329	MD02G1259200_novel04,MD02G1259200_novel06,MD02G1259200_novel07,MD02G1259200_novel01,MD02G1259200_novel02,MD02G1259200_novel08,MD02G1259200_novel09,MD02G1259200	MD02G1259200_novel05,MD02G1259200,MD02G1259200_novel01,MD02G1259200_novel02,MD02G1259200_novel06,MD02G1259200_novel04,MD02G1259200_novel07,MD02G1259200_novel08,MD02G1259200_novel09
Chr02	MD02G1259400	+	A3	31283844-31283890	MD02G1259400_novel01	MD02G1259400,MD02G1259400_novel02,MD02G1259400_novel03,MD02G1259400_novel01
Chr02	MD02G1259400	+	A3	31285840-31285842	MD02G1259400	MD02G1259400_novel01,MD02G1259400_novel02,MD02G1259400
Chr02	MD02G1259400	+	A3	31285840-31286452	MD02G1259400_novel03	MD02G1259400_novel02,MD02G1259400_novel03
Chr02	MD02G1259600	+	A3	31291099-31291316	MD02G1259600_novel03,MD02G1259600	MD02G1259600_novel06,MD02G1259600_novel11,MD02G1259600_novel03,MD02G1259600
Chr02	MD02G1259600	+	A3	31291796-31291803	MD02G1259600_novel08,MD02G1259600_novel09,MD02G1259600_novel03,MD02G1259600_novel02,MD02G1259600_novel10,MD02G1259600_novel04,MD02G1259600_novel05,MD02G1259600_novel06,MD02G1259600_novel07,MD02G1259600_novel01,MD02G1259600_novel11,MD02G1259600	MD02G1259600_novel12,MD02G1259600_novel03,MD02G1259600_novel01,MD02G1259600_novel04,MD02G1259600_novel05,MD02G1259600_novel06,MD02G1259600_novel02,MD02G1259600_novel07,MD02G1259600_novel08,MD02G1259600_novel09,MD02G1259600_novel10,MD02G1259600_novel11,MD02G1259600
Chr02	MD02G1259600	+	A3	31292508-31292599	MD02G1259600_novel10,MD02G1259600_novel12	MD02G1259600_novel03,MD02G1259600_novel01,MD02G1259600_novel04,MD02G1259600_novel02,MD02G1259600_novel11,MD02G1259600,MD02G1259600_novel10,MD02G1259600_novel12
Chr02	MD02G1260700	-	A3	31429968-31429966	MD02G1260700	MD02G1260700_novel02,MD02G1260700
Chr02	MD02G1260700	-	A3	31430605-31430511	MD02G1260700_novel03,MD02G1260700_novel02	MD02G1260700_novel01,MD02G1260700_novel02,MD02G1260700_novel03
Chr02	MD02G1260700	-	A3	31430605-31430579	MD02G1260700	MD02G1260700_novel01,MD02G1260700
Chr02	MD02G1261100	-	A3	31477090-31477081	MD02G1261100,MD02G1261100_novel15,MD02G1261100_novel01,MD02G1261100_novel10,MD02G1261100_novel08,MD02G1261100_novel09,MD02G1261100_novel04,MD02G1261100_novel05,MD02G1261100_novel06,MD02G1261100_novel14,MD02G1261100_novel13,MD02G1261100_novel12,MD02G1261100_novel11,MD02G1261100_novel03	MD02G1261100_novel02,MD02G1261100_novel08,MD02G1261100,MD02G1261100_novel05,MD02G1261100_novel10,MD02G1261100_novel15,MD02G1261100_novel01,MD02G1261100_novel03,MD02G1261100_novel13,MD02G1261100_novel06,MD02G1261100_novel09,MD02G1261100_novel14,MD02G1261100_novel12,MD02G1261100_novel11,MD02G1261100_novel04
Chr02	MD02G1261100	-	A3	31478110-31478004	MD02G1261100_novel03	MD02G1261100_novel08,MD02G1261100,MD02G1261100_novel05,MD02G1261100_novel10,MD02G1261100_novel15,MD02G1261100_novel01,MD02G1261100_novel13,MD02G1261100_novel06,MD02G1261100_novel09,MD02G1261100_novel14,MD02G1261100_novel12,MD02G1261100_novel02,MD02G1261100_novel11,MD02G1261100_novel04,MD02G1261100_novel03
Chr02	MD02G1261100	-	A3	31489592-31489586	MD02G1261100	MD02G1261100_novel03,MD02G1261100_novel02,MD02G1261100
Chr02	MD02G1262300	+	A3	31666715-31666721	MD02G1262300_novel02	MD02G1262300,MD02G1262300_novel02
Chr02	MD02G1263600	-	A3	31776333-31776328	MD02G1263600_novel01	MD02G1263600,MD02G1263600_novel01
Chr02	MD02G1264100	-	A3	31801314-31801297	MD02G1264100_novel01	MD02G1264100_novel05,MD02G1264100_novel07,MD02G1264100_novel03,MD02G1264100_novel01
Chr02	MD02G1264100	-	A3	31801349-31801297	MD02G1264100_novel01	MD02G1264100_novel15,MD02G1264100,MD02G1264100_novel04,MD02G1264100_novel06,MD02G1264100_novel02,MD02G1264100_novel01
Chr02	MD02G1264100	-	A3	31801349-31801314	MD02G1264100_novel07,MD02G1264100_novel05,MD02G1264100_novel03	MD02G1264100_novel15,MD02G1264100,MD02G1264100_novel04,MD02G1264100_novel06,MD02G1264100_novel02,MD02G1264100_novel05,MD02G1264100_novel07,MD02G1264100_novel03
Chr02	MD02G1264200	+	A3	31815949-31815956	MD02G1264200_novel03	MD02G1264200_novel01,MD02G1264200_novel04,MD02G1264200_novel02,MD02G1264200,MD02G1264200_novel03
Chr02	MD02G1264800	+	A3	31914673-31914736	MD02G1264800	MD02G1264800_novel01,MD02G1264800
Chr02	MD02G1265100	-	A3	31925153-31925147	MD02G1265100	MD02G1265100_novel01,MD02G1265100_novel03,MD02G1265100_novel02,MD02G1265100
Chr02	MD02G1265100	-	A3	31932276-31931985	MD02G1265100_novel01,MD02G1265100	MD02G1265100_novel02,MD02G1265100_novel01,MD02G1265100
Chr02	MD02G1265600	+	A3	31981663-31981675	MD02G1265600_novel01	MD02G1265600,MD02G1265600_novel01
Chr02	MD02G1266800	+	A3	32088216-32088230	MD02G1266800_novel03	MD02G1266800_novel04,MD02G1266800_novel02,MD02G1266800_novel03
Chr02	MD02G1266800	+	A3	32088216-32088245	MD02G1266800,MD02G1266800_novel01	MD02G1266800_novel04,MD02G1266800_novel02,MD02G1266800_novel01,MD02G1266800
Chr02	MD02G1266800	+	A3	32088230-32088245	MD02G1266800,MD02G1266800_novel01	MD02G1266800_novel03,MD02G1266800_novel01,MD02G1266800
Chr02	MD02G1266800	+	A3	32091782-32093434	MD02G1266800,MD02G1266800_novel03	MD02G1266800_novel01,MD02G1266800,MD02G1266800_novel03
Chr02	MD02G1266800	+	A3	32091782-32093437	MD02G1266800_novel02	MD02G1266800_novel01,MD02G1266800_novel02
Chr02	MD02G1266800	+	A3	32093434-32093437	MD02G1266800_novel02	MD02G1266800,MD02G1266800_novel03,MD02G1266800_novel02
Chr02	MD02G1268200	+	A3	32276531-32276534	MD02G1268200	MD02G1268200_novel01,MD02G1268200
Chr02	MD02G1269900	+	A3	32469614-32469629	MD02G1269900_novel02	MD02G1269900,MD02G1269900_novel03,MD02G1269900_novel05,MD02G1269900_novel02
Chr02	MD02G1270000	-	A3	32479878-32479838	MD02G1270000_novel02	MD02G1270000_novel10,MD02G1270000_novel01,MD02G1270000_novel09,MD02G1270000_novel07,MD02G1270000_novel03,MD02G1270000_novel04,MD02G1270000_novel08,MD02G1270000_novel05,MD02G1270000_novel06,MD02G1270000_novel11,MD02G1270000,MD02G1270000_novel02
Chr02	MD02G1270000	-	A3	32482196-32482173	MD02G1270000_novel10,MD02G1270000_novel09,MD02G1270000_novel08,MD02G1270000_novel02,MD02G1270000_novel03,MD02G1270000_novel11,MD02G1270000_novel01,MD02G1270000,MD02G1270000_novel06,MD02G1270000_novel05,MD02G1270000_novel04	MD02G1270000_novel07,MD02G1270000_novel10,MD02G1270000_novel01,MD02G1270000_novel09,MD02G1270000_novel02,MD02G1270000_novel03,MD02G1270000_novel04,MD02G1270000_novel08,MD02G1270000_novel05,MD02G1270000_novel06,MD02G1270000_novel11,MD02G1270000
Chr02	MD02G1271400	-	A3	32607532-32607483	MD02G1271400_novel01,MD02G1271400_novel03	MD02G1271400,MD02G1271400_novel02,MD02G1271400_novel01,MD02G1271400_novel03
Chr02	MD02G1273500	-	A3	32810751-32810721	MD02G1273500_novel02	MD02G1273500,MD02G1273500_novel02
Chr02	MD02G1276500	+	A3	33156524-33156548	MD02G1276500	MD02G1276500_novel01,MD02G1276500
Chr02	MD02G1277700	+	A3	33354873-33354877	MD02G1277700	MD02G1277700_novel01,MD02G1277700_novel02,MD02G1277700
Chr02	MD02G1277700	+	A3	33355893-33355908	MD02G1277700,MD02G1277700_novel02	MD02G1277700_novel01,MD02G1277700,MD02G1277700_novel02
Chr02	MD02G1277900	+	A3	33370490-33370499	MD02G1277900_novel02	MD02G1277900,MD02G1277900_novel01,MD02G1277900_novel03,MD02G1277900_novel04,MD02G1277900_novel05,MD02G1277900_novel02
Chr02	MD02G1278900	-	A3	33505202-33505132	MD02G1278900_novel01	MD02G1278900,MD02G1278900_novel01
Chr02	MD02G1279400	+	A3	33575782-33575834	MD02G1279400_novel01,MD02G1279400_novel03	MD02G1279400,MD02G1279400_novel02,MD02G1279400_novel01,MD02G1279400_novel03
Chr02	MD02G1284000	+	A3	34076919-34076938	MD02G1284000_novel08,MD02G1284000_novel05	MD02G1284000_novel01,MD02G1284000_novel02,MD02G1284000_novel03,MD02G1284000,MD02G1284000_novel04,MD02G1284000_novel06,MD02G1284000_novel09,MD02G1284000_novel07,MD02G1284000_novel11,MD02G1284000_novel05,MD02G1284000_novel08
Chr02	MD02G1284000	+	A3	34078255-34078267	MD02G1284000,MD02G1284000_novel08,MD02G1284000_novel01,MD02G1284000_novel02,MD02G1284000_novel10,MD02G1284000_novel04,MD02G1284000_novel06	MD02G1284000_novel03,MD02G1284000_novel05,MD02G1284000_novel07,MD02G1284000_novel11,MD02G1284000_novel12,MD02G1284000_novel01,MD02G1284000_novel02,MD02G1284000,MD02G1284000_novel04,MD02G1284000_novel06,MD02G1284000_novel10,MD02G1284000_novel08
Chr02	MD02G1287500	-	A3	34416355-34416321	MD02G1287500_novel02,MD02G1287500_novel03	MD02G1287500,MD02G1287500_novel06,MD02G1287500_novel01,MD02G1287500_novel07,MD02G1287500_novel04,MD02G1287500_novel08,MD02G1287500_novel05,MD02G1287500_novel02,MD02G1287500_novel03
Chr02	MD02G1287500	-	A3	34420942-34420937	MD02G1287500_novel02,MD02G1287500_novel04,MD02G1287500	MD02G1287500_novel01,MD02G1287500,MD02G1287500_novel02,MD02G1287500_novel04
Chr02	MD02G1289600	-	A3	34581689-34581601	MD02G1289600_novel02	MD02G1289600,MD02G1289600_novel01,MD02G1289600_novel03,MD02G1289600_novel02
Chr02	MD02G1289600	-	A3	34585628-34585111	MD02G1289600	MD02G1289600_novel01,MD02G1289600_novel02,MD02G1289600
Chr02	MD02G1289600	-	A3	34586074-34586069	MD02G1289600_novel01	MD02G1289600_novel03,MD02G1289600_novel01
Chr02	MD02G1290300	-	A3	34616512-34616481	MD02G1290300_novel03	MD02G1290300_novel02,MD02G1290300,MD02G1290300_novel03
Chr02	MD02G1296200	-	A3	35125809-35125772	MD02G1296200_novel01	MD02G1296200,MD02G1296200_novel01
Chr02	MD02G1300000	-	A3	35475279-35475276	MD02G1300000	MD02G1300000_novel05,MD02G1300000_novel07,MD02G1300000_novel09,MD02G1300000_novel03,MD02G1300000_novel10,MD02G1300000_novel11,MD02G1300000_novel01,MD02G1300000_novel08,MD02G1300000_novel06,MD02G1300000_novel04,MD02G1300000
Chr02	MD02G1300000	-	A3	35476213-35476210	MD02G1300000,MD02G1300000_novel03,MD02G1300000_novel09	MD02G1300000_novel05,MD02G1300000_novel07,MD02G1300000_novel10,MD02G1300000_novel01,MD02G1300000_novel08,MD02G1300000_novel06,MD02G1300000_novel04,MD02G1300000,MD02G1300000_novel09,MD02G1300000_novel03
Chr02	MD02G1300000	-	A3	35478231-35478217	MD02G1300000_novel09	MD02G1300000,MD02G1300000_novel05,MD02G1300000_novel07,MD02G1300000_novel03,MD02G1300000_novel01,MD02G1300000_novel08,MD02G1300000_novel06,MD02G1300000_novel04,MD02G1300000_novel09
Chr02	MD02G1301200	+	A3	35585787-35585825	MD02G1301200_novel01	MD02G1301200,MD02G1301200_novel01
Chr02	MD02G1302100	-	A3	35648380-35648373	MD02G1302100_novel02	MD02G1302100,MD02G1302100_novel01,MD02G1302100_novel03,MD02G1302100_novel04,MD02G1302100_novel05,MD02G1302100_novel07,MD02G1302100_novel06,MD02G1302100_novel02
Chr02	MD02G1302100	-	A3	35649559-35648699	MD02G1302100_novel03	MD02G1302100,MD02G1302100_novel06,MD02G1302100_novel03
Chr02	MD02G1302200	+	A3	35662476-35662499	MD02G1302200_novel02,MD02G1302200	MD02G1302200_novel01,MD02G1302200,MD02G1302200_novel02
Chr02	MD02G1302500	+	A3	35674841-35675149	MD02G1302500	MD02G1302500_novel01,MD02G1302500
Chr02	MD02G1304800	-	A3	35816203-35816200	MD02G1304800_novel03,MD02G1304800_novel02,MD02G1304800_novel01	MD02G1304800,MD02G1304800_novel01,MD02G1304800_novel03,MD02G1304800_novel02
Chr02	MD02G1311600	+	A3	36660194-36660313	MD02G1311600_novel02	MD02G1311600_novel01,MD02G1311600,MD02G1311600_novel03,MD02G1311600_novel04,MD02G1311600_novel02
Chr02	MD02G1313900	+	A3	36938468-36939412	MD02G1313900_novel02,MD02G1313900,MD02G1313900_novel05	MD02G1313900_novel03,MD02G1313900_novel02,MD02G1313900,MD02G1313900_novel05
Chr02	MD02G1315300	+	A3	37013665-37013684	MD02G1315300	MD02G1315300_novel01,MD02G1315300
Chr02	MD02G1315400	+	A3	37017939-37018037	MD02G1315400_novel03	MD02G1315400_novel01,MD02G1315400_novel02,MD02G1315400_novel04,MD02G1315400_novel05,MD02G1315400_novel06,MD02G1315400,MD02G1315400_novel09,MD02G1315400_novel03
Chr02	MD02G1315400	+	A3	37019215-37019358	MD02G1315400_novel05,MD02G1315400_novel04,MD02G1315400_novel09,MD02G1315400	MD02G1315400_novel06,MD02G1315400_novel04,MD02G1315400_novel05,MD02G1315400,MD02G1315400_novel09
Chr02	MD02G1315400	+	A3	37020498-37020999	MD02G1315400_novel04	MD02G1315400_novel08,MD02G1315400_novel04
Chr02	MD02G1316300	-	A3	37075446-37075205	MD02G1316300_novel04	MD02G1316300,MD02G1316300_novel03,MD02G1316300_novel02,MD02G1316300_novel04
Chr02	MD02G1316400	+	A3	37083045-37083080	MD02G1316400_novel11,MD02G1316400_novel05,MD02G1316400_novel06,MD02G1316400_novel04,MD02G1316400_novel16,MD02G1316400_novel15,MD02G1316400_novel14,MD02G1316400_novel13,MD02G1316400_novel01,MD02G1316400_novel02,MD02G1316400_novel12,MD02G1316400_novel08,MD02G1316400_novel09,MD02G1316400_novel07	MD02G1316400,MD02G1316400_novel01,MD02G1316400_novel05,MD02G1316400_novel06,MD02G1316400_novel11,MD02G1316400_novel09,MD02G1316400_novel07,MD02G1316400_novel08,MD02G1316400_novel02,MD02G1316400_novel12,MD02G1316400_novel13,MD02G1316400_novel14,MD02G1316400_novel15,MD02G1316400_novel04,MD02G1316400_novel16
Chr02	MD02G1316400	+	A3	37084938-37084969	MD02G1316400_novel11,MD02G1316400_novel05,MD02G1316400,MD02G1316400_novel16,MD02G1316400_novel06,MD02G1316400_novel07,MD02G1316400_novel01,MD02G1316400_novel02,MD02G1316400_novel03,MD02G1316400_novel09	MD02G1316400_novel04,MD02G1316400_novel01,MD02G1316400,MD02G1316400_novel05,MD02G1316400_novel06,MD02G1316400_novel11,MD02G1316400_novel09,MD02G1316400_novel03,MD02G1316400_novel07,MD02G1316400_novel02,MD02G1316400_novel16
Chr02	MD02G1316400	+	A3	37089790-37089800	MD02G1316400_novel13	MD02G1316400_novel01,MD02G1316400,MD02G1316400_novel05,MD02G1316400_novel06,MD02G1316400_novel11,MD02G1316400_novel09,MD02G1316400_novel03,MD02G1316400_novel10,MD02G1316400_novel02,MD02G1316400_novel12,MD02G1316400_novel14,MD02G1316400_novel15,MD02G1316400_novel04,MD02G1316400_novel16,MD02G1316400_novel17,MD02G1316400_novel18,MD02G1316400_novel19,MD02G1316400_novel20,MD02G1316400_novel21,MD02G131…
Chr02	MD02G1316400	+	A3	37095253-37095274	MD02G1316400_novel24,MD02G1316400_novel01,MD02G1316400_novel14,MD02G1316400_novel27	MD02G1316400,MD02G1316400_novel05,MD02G1316400_novel11,MD02G1316400_novel09,MD02G1316400_novel03,MD02G1316400_novel10,MD02G1316400_novel07,MD02G1316400_novel08,MD02G1316400_novel02,MD02G1316400_novel12,MD02G1316400_novel13,MD02G1316400_novel04,MD02G1316400_novel17,MD02G1316400_novel19,MD02G1316400_novel20,MD02G1316400_novel21,MD02G1316400_novel22,MD02G1316400_novel23,MD02G1316400_novel25,MD02G131…
Chr02	MD02G1316500	-	A3	37101200-37101165	MD02G1316500	MD02G1316500_novel01,MD02G1316500
Chr02	MD02G1319100	-	A3	37360516-37360485	MD02G1319100_novel03	MD02G1319100,MD02G1319100_novel01,MD02G1319100_novel02,MD02G1319100_novel04,MD02G1319100_novel05,MD02G1319100_novel03
Chr02	MD02G1319300	-	A3	37371683-37371645	MD02G1319300_novel04	MD02G1319300,MD02G1319300_novel09,MD02G1319300_novel06,MD02G1319300_novel03,MD02G1319300_novel11,MD02G1319300_novel05,MD02G1319300_novel02,MD02G1319300_novel01,MD02G1319300_novel08,MD02G1319300_novel07,MD02G1319300_novel10,MD02G1319300_novel04
Chr02	MD02G1319300	-	A3	37377871-37377862	MD02G1319300_novel08	MD02G1319300,MD02G1319300_novel09,MD02G1319300_novel06,MD02G1319300_novel03,MD02G1319300_novel04,MD02G1319300_novel05,MD02G1319300_novel02,MD02G1319300_novel01,MD02G1319300_novel07,MD02G1319300_novel08
Chr02	MD02G1320400	+	A3	37454728-37454753	MD02G1320400_novel02	MD02G1320400_novel01,MD02G1320400,MD02G1320400_novel03,MD02G1320400_novel04,MD02G1320400_novel05,MD02G1320400_novel02
Chr02	MD02G1320400	+	A3	37455032-37455078	MD02G1320400_novel04,MD02G1320400_novel03	MD02G1320400,MD02G1320400_novel05,MD02G1320400_novel03,MD02G1320400_novel04
Chr03	MD03G1002500	-	A3	177950-177896	MD03G1002500_novel03	MD03G1002500,MD03G1002500_novel01,MD03G1002500_novel02,MD03G1002500_novel04,MD03G1002500_novel05,MD03G1002500_novel06,MD03G1002500_novel03
Chr03	MD03G1002900	+	A3	213764-213770	MD03G1002900_novel02	MD03G1002900_novel01,MD03G1002900_novel02
Chr03	MD03G1003300	-	A3	233437-233426	MD03G1003300_novel01,MD03G1003300,MD03G1003300_novel02	MD03G1003300_novel03,MD03G1003300_novel04,MD03G1003300,MD03G1003300_novel01,MD03G1003300_novel02
Chr03	MD03G1003700	-	A3	276755-276726	MD03G1003700_novel01	MD03G1003700,MD03G1003700_novel01
Chr03	MD03G1004600	-	A3	356527-356516	MD03G1004600_novel04	MD03G1004600,MD03G1004600_novel02,MD03G1004600_novel01,MD03G1004600_novel03,MD03G1004600_novel04
Chr03	MD03G1005700	-	A3	471083-471057	MD03G1005700_novel01	MD03G1005700,MD03G1005700_novel01
Chr03	MD03G1008200	-	A3	648437-648415	MD03G1008200_novel01	MD03G1008200,MD03G1008200_novel01
Chr03	MD03G1009400	-	A3	726044-726029	MD03G1009400_novel01	MD03G1009400,MD03G1009400_novel01
Chr03	MD03G1010200	+	A3	786520-786525	MD03G1010200	MD03G1010200_novel01,MD03G1010200_novel02,MD03G1010200
Chr03	MD03G1010200	+	A3	787984-788250	MD03G1010200_novel02	MD03G1010200,MD03G1010200_novel02
Chr03	MD03G1012300	-	A3	938015-938009	MD03G1012300	MD03G1012300_novel01,MD03G1012300_novel02,MD03G1012300
Chr03	MD03G1014800	-	A3	1181500-1181256	MD03G1014800_novel04	MD03G1014800,MD03G1014800_novel04
Chr03	MD03G1014800	-	A3	1181503-1181500	MD03G1014800	MD03G1014800_novel05,MD03G1014800
Chr03	MD03G1015000	-	A3	1194566-1194556	MD03G1015000_novel03	MD03G1015000,MD03G1015000_novel09,MD03G1015000_novel01,MD03G1015000_novel10,MD03G1015000_novel15,MD03G1015000_novel05,MD03G1015000_novel02,MD03G1015000_novel12,MD03G1015000_novel04,MD03G1015000_novel11,MD03G1015000_novel14,MD03G1015000_novel07,MD03G1015000_novel13,MD03G1015000_novel03
Chr03	MD03G1015000	-	A3	1203897-1203857	MD03G1015000_novel01,MD03G1015000_novel05	MD03G1015000,MD03G1015000_novel06,MD03G1015000_novel03,MD03G1015000_novel01,MD03G1015000_novel05
Chr03	MD03G1015000	-	A3	1203900-1203857	MD03G1015000_novel01,MD03G1015000_novel05	MD03G1015000_novel09,MD03G1015000_novel10,MD03G1015000_novel02,MD03G1015000_novel04,MD03G1015000_novel07,MD03G1015000_novel08,MD03G1015000_novel01,MD03G1015000_novel05
Chr03	MD03G1015000	-	A3	1203900-1203897	MD03G1015000,MD03G1015000_novel03,MD03G1015000_novel06	MD03G1015000_novel09,MD03G1015000_novel10,MD03G1015000_novel02,MD03G1015000_novel04,MD03G1015000_novel07,MD03G1015000_novel08,MD03G1015000,MD03G1015000_novel06,MD03G1015000_novel03
Chr03	MD03G1018600	-	A3	1444294-1444197	MD03G1018600_novel01	MD03G1018600,MD03G1018600_novel01
Chr03	MD03G1019400	-	A3	1489993-1489976	MD03G1019400_novel04	MD03G1019400_novel03,MD03G1019400_novel04
Chr03	MD03G1019400	-	A3	1490593-1490569	MD03G1019400_novel02	MD03G1019400,MD03G1019400_novel01,MD03G1019400_novel02
Chr03	MD03G1020700	-	A3	1595115-1595098	MD03G1020700_novel02,MD03G1020700_novel03,MD03G1020700	MD03G1020700_novel01,MD03G1020700,MD03G1020700_novel03,MD03G1020700_novel02
Chr03	MD03G1023200	-	A3	1863664-1863658	MD03G1023200	MD03G1023200_novel03,MD03G1023200_novel01,MD03G1023200_novel02,MD03G1023200
Chr03	MD03G1023200	-	A3	1864719-1864671	MD03G1023200_novel01	MD03G1023200,MD03G1023200_novel02,MD03G1023200_novel01
Chr03	MD03G1023400	-	A3	1899502-1899499	MD03G1023400,MD03G1023400_novel02	MD03G1023400_novel01,MD03G1023400,MD03G1023400_novel02
Chr03	MD03G1023500	-	A3	1914023-1914013	MD03G1023500_novel03	MD03G1023500,MD03G1023500_novel05,MD03G1023500_novel04,MD03G1023500_novel02,MD03G1023500_novel03
Chr03	MD03G1024500	-	A3	2035627-2035619	MD03G1024500_novel01	MD03G1024500,MD03G1024500_novel03,MD03G1024500_novel02,MD03G1024500_novel01
Chr03	MD03G1024500	-	A3	2036326-2036318	MD03G1024500	MD03G1024500_novel03,MD03G1024500_novel01,MD03G1024500_novel02,MD03G1024500
Chr03	MD03G1028000	+	A3	2298490-2298500	MD03G1028000_novel01	MD03G1028000,MD03G1028000_novel01
Chr03	MD03G1028500	+	A3	2339078-2339082	MD03G1028500	MD03G1028500_novel01,MD03G1028500_novel02,MD03G1028500
Chr03	MD03G1029500	-	A3	2409656-2409653	MD03G1029500_novel02	MD03G1029500_novel01,MD03G1029500,MD03G1029500_novel02
Chr03	MD03G1031700	-	A3	2550366-2550362	MD03G1031700_novel03	MD03G1031700_novel02,MD03G1031700,MD03G1031700_novel01,MD03G1031700_novel03
Chr03	MD03G1039800	+	A3	3158407-3158422	MD03G1039800_novel02	MD03G1039800,MD03G1039800_novel04,MD03G1039800_novel03,MD03G1039800_novel06,MD03G1039800_novel07,MD03G1039800_novel08,MD03G1039800_novel02
Chr03	MD03G1040300	+	A3	3193127-3193369	MD03G1040300	MD03G1040300_novel03,MD03G1040300
Chr03	MD03G1040300	+	A3	3193127-3193730	MD03G1040300_novel02	MD03G1040300_novel03,MD03G1040300_novel02
Chr03	MD03G1040600	-	A3	3219651-3219633	MD03G1040600_novel01	MD03G1040600,MD03G1040600_novel01
Chr03	MD03G1042700	+	A3	3349627-3349969	MD03G1042700_novel02	MD03G1042700_novel01,MD03G1042700_novel06,MD03G1042700_novel02
Chr03	MD03G1042700	+	A3	3351892-3351906	MD03G1042700_novel03	MD03G1042700,MD03G1042700_novel01,MD03G1042700_novel06,MD03G1042700_novel04,MD03G1042700_novel05,MD03G1042700_novel08,MD03G1042700_novel02,MD03G1042700_novel03
Chr03	MD03G1044400	-	A3	3515023-3515016	MD03G1044400_novel01	MD03G1044400,MD03G1044400_novel01
Chr03	MD03G1045600	+	A3	3657388-3657391	MD03G1045600,MD03G1045600_novel08,MD03G1045600_novel09,MD03G1045600_novel06,MD03G1045600_novel07,MD03G1045600_novel04,MD03G1045600_novel05,MD03G1045600_novel02,MD03G1045600_novel03,MD03G1045600_novel10	MD03G1045600_novel01,MD03G1045600_novel02,MD03G1045600,MD03G1045600_novel03,MD03G1045600_novel05,MD03G1045600_novel08,MD03G1045600_novel04,MD03G1045600_novel07,MD03G1045600_novel09,MD03G1045600_novel10,MD03G1045600_novel06
Chr03	MD03G1045600	+	A3	3657607-3657624	MD03G1045600,MD03G1045600_novel08,MD03G1045600_novel09,MD03G1045600_novel06,MD03G1045600_novel05,MD03G1045600_novel02,MD03G1045600_novel03,MD03G1045600_novel01,MD03G1045600_novel10	MD03G1045600_novel04,MD03G1045600_novel07,MD03G1045600_novel01,MD03G1045600_novel02,MD03G1045600,MD03G1045600_novel03,MD03G1045600_novel05,MD03G1045600_novel08,MD03G1045600_novel09,MD03G1045600_novel10,MD03G1045600_novel06
Chr03	MD03G1045900	+	A3	3704094-3704130	MD03G1045900_novel01,MD03G1045900_novel02,MD03G1045900_novel03	MD03G1045900,MD03G1045900_novel02,MD03G1045900_novel01,MD03G1045900_novel03
Chr03	MD03G1047100	+	A3	3794913-3794964	MD03G1047100_novel07	MD03G1047100_novel01,MD03G1047100_novel05,MD03G1047100_novel04,MD03G1047100_novel03,MD03G1047100_novel02,MD03G1047100_novel06,MD03G1047100,MD03G1047100_novel08,MD03G1047100_novel09,MD03G1047100_novel07
Chr03	MD03G1047300	+	A3	3803928-3803934	MD03G1047300_novel01,MD03G1047300_novel02	MD03G1047300,MD03G1047300_novel01,MD03G1047300_novel02
Chr03	MD03G1048600	-	A3	3888258-3888255	MD03G1048600_novel01,MD03G1048600_novel02	MD03G1048600,MD03G1048600_novel01,MD03G1048600_novel02
Chr03	MD03G1048600	-	A3	3890525-3890475	MD03G1048600_novel01,MD03G1048600_novel02	MD03G1048600,MD03G1048600_novel01,MD03G1048600_novel02
Chr03	MD03G1050800	-	A3	4033561-4033557	MD03G1050800_novel02,MD03G1050800	MD03G1050800_novel01,MD03G1050800,MD03G1050800_novel02
Chr03	MD03G1052200	-	A3	4162309-4162280	MD03G1052200,MD03G1052200_novel01	MD03G1052200_novel02,MD03G1052200,MD03G1052200_novel01
Chr03	MD03G1052200	-	A3	4163395-4163377	MD03G1052200_novel01	MD03G1052200,MD03G1052200_novel02,MD03G1052200_novel01
Chr03	MD03G1052500	-	A3	4184771-4184767	MD03G1052500	MD03G1052500_novel02,MD03G1052500_novel01,MD03G1052500
Chr03	MD03G1052500	-	A3	4185985-4185978	MD03G1052500_novel01	MD03G1052500_novel02,MD03G1052500,MD03G1052500_novel01
Chr03	MD03G1055200	+	A3	4397784-4397818	MD03G1055200_novel01	MD03G1055200,MD03G1055200_novel01
Chr03	MD03G1055800	-	A3	4433145-4433115	MD03G1055800_novel01	MD03G1055800,MD03G1055800_novel01
Chr03	MD03G1056500	-	A3	4519246-4519223	MD03G1056500_novel02	MD03G1056500,MD03G1056500_novel07,MD03G1056500_novel01,MD03G1056500_novel03,MD03G1056500_novel04,MD03G1056500_novel06,MD03G1056500_novel05,MD03G1056500_novel02
Chr03	MD03G1056500	-	A3	4521495-4521488	MD03G1056500_novel04,MD03G1056500_novel06,MD03G1056500_novel02,MD03G1056500	MD03G1056500_novel01,MD03G1056500_novel05,MD03G1056500,MD03G1056500_novel02,MD03G1056500_novel04,MD03G1056500_novel06
Chr03	MD03G1056600	+	A3	4526748-4526775	MD03G1056600_novel02	MD03G1056600_novel01,MD03G1056600,MD03G1056600_novel02
Chr03	MD03G1058300	-	A3	4699079-4699076	MD03G1058300	MD03G1058300_novel01,MD03G1058300_novel02,MD03G1058300
Chr03	MD03G1060300	-	A3	4867753-4867750	MD03G1060300	MD03G1060300_novel01,MD03G1060300
Chr03	MD03G1060300	-	A3	4869695-4869677	MD03G1060300	MD03G1060300_novel01,MD03G1060300
Chr03	MD03G1062500	-	A3	5028733-5028730	MD03G1062500	MD03G1062500_novel01,MD03G1062500
Chr03	MD03G1062700	+	A3	5060329-5060332	MD03G1062700_novel02	MD03G1062700_novel01,MD03G1062700_novel03,MD03G1062700,MD03G1062700_novel02
Chr03	MD03G1067100	+	A3	5365929-5365992	MD03G1067100	MD03G1067100_novel01,MD03G1067100
Chr03	MD03G1068500	-	A3	5568638-5568613	MD03G1068500,MD03G1068500_novel01	MD03G1068500_novel02,MD03G1068500,MD03G1068500_novel01
Chr03	MD03G1070200	+	A3	5728871-5728891	MD03G1070200_novel04	MD03G1070200,MD03G1070200_novel01,MD03G1070200_novel02,MD03G1070200_novel05,MD03G1070200_novel06,MD03G1070200_novel04
Chr03	MD03G1071900	-	A3	5851735-5851730	MD03G1071900_novel04,MD03G1071900_novel01,MD03G1071900_novel03,MD03G1071900	MD03G1071900_novel02,MD03G1071900_novel04,MD03G1071900_novel01,MD03G1071900,MD03G1071900_novel03
Chr03	MD03G1071900	-	A3	5853004-5852983	MD03G1071900_novel01,MD03G1071900_novel02,MD03G1071900_novel03	MD03G1071900,MD03G1071900_novel02,MD03G1071900_novel01,MD03G1071900_novel03
Chr03	MD03G1072300	-	A3	5875319-5875298	MD03G1072300_novel01	MD03G1072300,MD03G1072300_novel01
Chr03	MD03G1074100	-	A3	6014774-6014769	MD03G1074100_novel02	MD03G1074100_novel07,MD03G1074100,MD03G1074100_novel03,MD03G1074100_novel01,MD03G1074100_novel08,MD03G1074100_novel06,MD03G1074100_novel05,MD03G1074100_novel04,MD03G1074100_novel02
Chr03	MD03G1077900	+	A3	6312950-6312959	MD03G1077900_novel01,MD03G1077900_novel02	MD03G1077900_novel03,MD03G1077900,MD03G1077900_novel01,MD03G1077900_novel02
Chr03	MD03G1077900	+	A3	6313875-6313889	MD03G1077900_novel02,MD03G1077900_novel03,MD03G1077900	MD03G1077900_novel01,MD03G1077900_novel03,MD03G1077900_novel02,MD03G1077900
Chr03	MD03G1078500	-	A3	6354687-6354674	MD03G1078500_novel02	MD03G1078500_novel01,MD03G1078500_novel02
Chr03	MD03G1078500	-	A3	6354690-6354674	MD03G1078500_novel02	MD03G1078500,MD03G1078500_novel02
Chr03	MD03G1078500	-	A3	6354690-6354687	MD03G1078500_novel01	MD03G1078500,MD03G1078500_novel01
Chr03	MD03G1079800	-	A3	6425329-6425311	MD03G1079800	MD03G1079800_novel01,MD03G1079800
Chr03	MD03G1079900	+	A3	6438697-6438729	MD03G1079900_novel02	MD03G1079900_novel01,MD03G1079900_novel02
Chr03	MD03G1079900	+	A3	6438697-6438743	MD03G1079900,MD03G1079900_novel03	MD03G1079900_novel01,MD03G1079900,MD03G1079900_novel03
Chr03	MD03G1079900	+	A3	6438729-6438743	MD03G1079900,MD03G1079900_novel03	MD03G1079900_novel02,MD03G1079900,MD03G1079900_novel03
Chr03	MD03G1080900	+	A3	6524209-6524213	MD03G1080900	MD03G1080900_novel02,MD03G1080900
Chr03	MD03G1080900	+	A3	6524424-6524756	MD03G1080900	MD03G1080900_novel01,MD03G1080900_novel02,MD03G1080900
Chr03	MD03G1081000	-	A3	6529162-6529102	MD03G1081000,MD03G1081000_novel04,MD03G1081000_novel05,MD03G1081000_novel06,MD03G1081000_novel07,MD03G1081000_novel01,MD03G1081000_novel02	MD03G1081000_novel03,MD03G1081000_novel07,MD03G1081000,MD03G1081000_novel05,MD03G1081000_novel02,MD03G1081000_novel01,MD03G1081000_novel04,MD03G1081000_novel06
Chr03	MD03G1081000	-	A3	6529944-6529478	MD03G1081000,MD03G1081000_novel04,MD03G1081000_novel07,MD03G1081000_novel02,MD03G1081000_novel03	MD03G1081000_novel06,MD03G1081000_novel07,MD03G1081000,MD03G1081000_novel02,MD03G1081000_novel04,MD03G1081000_novel03
Chr03	MD03G1083100	-	A3	6732726-6732686	MD03G1083100,MD03G1083100_novel10	MD03G1083100_novel11,MD03G1083100,MD03G1083100_novel10
Chr03	MD03G1084600	-	A3	6819808-6819791	MD03G1084600,MD03G1084600_novel02	MD03G1084600_novel01,MD03G1084600,MD03G1084600_novel02
Chr03	MD03G1084800	-	A3	6827000-6826979	MD03G1084800_novel01	MD03G1084800,MD03G1084800_novel01
Chr03	MD03G1086100	-	A3	7028032-7028012	MD03G1086100_novel06	MD03G1086100,MD03G1086100_novel09,MD03G1086100_novel08,MD03G1086100_novel05,MD03G1086100_novel10,MD03G1086100_novel03,MD03G1086100_novel06
Chr03	MD03G1086100	-	A3	7029747-7029744	MD03G1086100_novel07,MD03G1086100_novel01,MD03G1086100_novel11	MD03G1086100,MD03G1086100_novel09,MD03G1086100_novel08,MD03G1086100_novel02,MD03G1086100_novel10,MD03G1086100_novel03,MD03G1086100_novel04,MD03G1086100_novel01,MD03G1086100_novel07,MD03G1086100_novel11
Chr03	MD03G1086100	-	A3	7031898-7031848	MD03G1086100,MD03G1086100_novel04,MD03G1086100_novel07,MD03G1086100_novel01,MD03G1086100_novel02,MD03G1086100_novel10	MD03G1086100_novel06,MD03G1086100_novel08,MD03G1086100_novel05,MD03G1086100_novel03,MD03G1086100,MD03G1086100_novel01,MD03G1086100_novel02,MD03G1086100_novel10,MD03G1086100_novel07,MD03G1086100_novel04
Chr03	MD03G1086200	+	A3	7050641-7050786	MD03G1086200	MD03G1086200_novel01,MD03G1086200_novel02,MD03G1086200
Chr03	MD03G1086600	-	A3	7077271-7077096	MD03G1086600	MD03G1086600_novel01,MD03G1086600
Chr03	MD03G1087000	-	A3	7090341-7090337	MD03G1087000	MD03G1087000_novel01,MD03G1087000_novel03,MD03G1087000_novel05,MD03G1087000_novel02,MD03G1087000_novel06,MD03G1087000
Chr03	MD03G1089200	-	A3	7345544-7345477	MD03G1089200_novel02	MD03G1089200_novel01,MD03G1089200_novel02
Chr03	MD03G1090000	-	A3	7421076-7421059	MD03G1090000_novel03	MD03G1090000_novel02,MD03G1090000_novel01,MD03G1090000,MD03G1090000_novel04,MD03G1090000_novel03
Chr03	MD03G1091000	-	A3	7547370-7547313	MD03G1091000_novel04,MD03G1091000_novel01,MD03G1091000_novel03	MD03G1091000_novel02,MD03G1091000_novel01,MD03G1091000_novel04,MD03G1091000_novel03
Chr03	MD03G1093200	+	A3	7786192-7786207	MD03G1093200_novel01,MD03G1093200	MD03G1093200_novel02,MD03G1093200,MD03G1093200_novel01
Chr03	MD03G1093600	+	A3	7809801-7809878	MD03G1093600_novel02	MD03G1093600,MD03G1093600_novel02
Chr03	MD03G1096300	+	A3	8175581-8175603	MD03G1096300	MD03G1096300_novel01,MD03G1096300
Chr03	MD03G1100000	+	A3	8561302-8561724	MD03G1100000,MD03G1100000_novel01	MD03G1100000_novel02,MD03G1100000,MD03G1100000_novel01
Chr03	MD03G1103200	+	A3	8823340-8823353	MD03G1103200_novel04	MD03G1103200,MD03G1103200_novel01,MD03G1103200_novel02,MD03G1103200_novel03,MD03G1103200_novel04
Chr03	MD03G1103300	-	A3	8831711-8831700	MD03G1103300_novel06,MD03G1103300_novel04,MD03G1103300_novel05,MD03G1103300_novel02,MD03G1103300_novel03,MD03G1103300_novel10,MD03G1103300_novel01,MD03G1103300,MD03G1103300_novel08,MD03G1103300_novel09	MD03G1103300_novel07,MD03G1103300_novel02,MD03G1103300_novel03,MD03G1103300,MD03G1103300_novel09,MD03G1103300_novel04,MD03G1103300_novel06,MD03G1103300_novel05,MD03G1103300_novel10,MD03G1103300_novel01,MD03G1103300_novel08
Chr03	MD03G1103300	-	A3	8833127-8833109	MD03G1103300_novel06,MD03G1103300_novel07,MD03G1103300_novel04,MD03G1103300_novel10	MD03G1103300_novel02,MD03G1103300_novel03,MD03G1103300,MD03G1103300_novel09,MD03G1103300_novel05,MD03G1103300_novel01,MD03G1103300_novel08,MD03G1103300_novel04,MD03G1103300_novel06,MD03G1103300_novel07,MD03G1103300_novel10
Chr03	MD03G1106200	-	A3	9099287-9099254	MD03G1106200_novel02,MD03G1106200_novel05	MD03G1106200_novel01,MD03G1106200_novel06,MD03G1106200_novel05,MD03G1106200_novel02
Chr03	MD03G1108000	-	A3	9368901-9368895	MD03G1108000,MD03G1108000_novel01	MD03G1108000_novel03,MD03G1108000_novel04,MD03G1108000,MD03G1108000_novel01
Chr03	MD03G1111700	+	A3	9737316-9737322	MD03G1111700_novel01,MD03G1111700_novel02	MD03G1111700,MD03G1111700_novel01,MD03G1111700_novel02
Chr03	MD03G1112600	-	A3	9898355-9898341	MD03G1112600_novel01	MD03G1112600_novel02,MD03G1112600_novel01
Chr03	MD03G1112700	+	A3	9912395-9912402	MD03G1112700_novel06	MD03G1112700,MD03G1112700_novel01,MD03G1112700_novel05,MD03G1112700_novel03,MD03G1112700_novel08,MD03G1112700_novel02,MD03G1112700_novel09,MD03G1112700_novel07,MD03G1112700_novel10,MD03G1112700_novel04,MD03G1112700_novel06
Chr03	MD03G1112700	+	A3	9915440-9915486	MD03G1112700_novel03	MD03G1112700,MD03G1112700_novel01,MD03G1112700_novel05,MD03G1112700_novel08,MD03G1112700_novel02,MD03G1112700_novel09,MD03G1112700_novel07,MD03G1112700_novel10,MD03G1112700_novel04,MD03G1112700_novel03
Chr03	MD03G1114500	-	A3	10007522-10007502	MD03G1114500_novel04,MD03G1114500_novel05,MD03G1114500_novel01,MD03G1114500_novel03,MD03G1114500	MD03G1114500_novel02,MD03G1114500_novel03,MD03G1114500_novel05,MD03G1114500_novel01,MD03G1114500_novel04,MD03G1114500
Chr03	MD03G1116000	+	A3	10313913-10313919	MD03G1116000_novel02	MD03G1116000,MD03G1116000_novel02
Chr03	MD03G1116700	+	A3	10471439-10471471	MD03G1116700	MD03G1116700_novel01,MD03G1116700_novel02,MD03G1116700_novel03,MD03G1116700
Chr03	MD03G1119900	-	A3	11001703-11001698	MD03G1119900_novel06	MD03G1119900,MD03G1119900_novel07,MD03G1119900_novel02,MD03G1119900_novel01,MD03G1119900_novel05,MD03G1119900_novel03,MD03G1119900_novel04,MD03G1119900_novel08,MD03G1119900_novel06
Chr03	MD03G1119900	-	A3	11002358-11002324	MD03G1119900_novel01	MD03G1119900,MD03G1119900_novel07,MD03G1119900_novel02,MD03G1119900_novel05,MD03G1119900_novel06,MD03G1119900_novel03,MD03G1119900_novel04,MD03G1119900_novel08,MD03G1119900_novel01
Chr03	MD03G1119900	-	A3	11003178-11003046	MD03G1119900_novel02,MD03G1119900_novel01	MD03G1119900_novel07,MD03G1119900_novel02,MD03G1119900_novel01
Chr03	MD03G1119900	-	A3	11003241-11003046	MD03G1119900_novel02,MD03G1119900_novel01	MD03G1119900,MD03G1119900_novel03,MD03G1119900_novel04,MD03G1119900_novel08,MD03G1119900_novel02,MD03G1119900_novel01
Chr03	MD03G1119900	-	A3	11003241-11003178	MD03G1119900_novel07	MD03G1119900,MD03G1119900_novel03,MD03G1119900_novel04,MD03G1119900_novel08,MD03G1119900_novel07
Chr03	MD03G1119900	-	A3	11004597-11004594	MD03G1119900_novel08,MD03G1119900	MD03G1119900_novel07,MD03G1119900,MD03G1119900_novel08
Chr03	MD03G1119900	-	A3	11004597-11004594	MD03G1119900_novel01,MD03G1119900_novel06	MD03G1119900_novel02,MD03G1119900_novel05,MD03G1119900_novel03,MD03G1119900_novel04,MD03G1119900_novel01,MD03G1119900_novel06
Chr03	MD03G1121600	-	A3	11309687-11309674	MD03G1121600_novel02	MD03G1121600,MD03G1121600_novel02
Chr03	MD03G1122400	-	A3	11449315-11449298	MD03G1122400_novel01	MD03G1122400_novel05,MD03G1122400,MD03G1122400_novel04,MD03G1122400_novel01
Chr03	MD03G1123900	-	A3	11619982-11619976	MD03G1123900	MD03G1123900_novel01,MD03G1123900
Chr03	MD03G1129700	-	A3	12649354-12649297	MD03G1129700_novel02,MD03G1129700_novel06,MD03G1129700_novel04	MD03G1129700,MD03G1129700_novel05,MD03G1129700_novel07,MD03G1129700_novel06,MD03G1129700_novel04,MD03G1129700_novel02
Chr03	MD03G1129800	+	A3	12669029-12669040	MD03G1129800_novel04,MD03G1129800_novel06,MD03G1129800_novel01,MD03G1129800_novel03,MD03G1129800	MD03G1129800_novel02,MD03G1129800_novel07,MD03G1129800,MD03G1129800_novel03,MD03G1129800_novel01,MD03G1129800_novel04,MD03G1129800_novel06
Chr03	MD03G1129800	+	A3	12675351-12675355	MD03G1129800_novel01	MD03G1129800_novel02,MD03G1129800_novel03,MD03G1129800_novel04,MD03G1129800_novel06,MD03G1129800_novel07,MD03G1129800_novel08,MD03G1129800_novel01
Chr03	MD03G1129800	+	A3	12677511-12677548	MD03G1129800_novel03	MD03G1129800,MD03G1129800_novel02,MD03G1129800_novel01,MD03G1129800_novel04,MD03G1129800_novel07,MD03G1129800_novel08,MD03G1129800_novel03
Chr03	MD03G1130700	-	A3	12884102-12884088	MD03G1130700_novel02,MD03G1130700	MD03G1130700_novel01,MD03G1130700,MD03G1130700_novel02
Chr03	MD03G1131700	+	A3	13002994-13003020	MD03G1131700_novel01	MD03G1131700,MD03G1131700_novel01
Chr03	MD03G1132200	+	A3	13123385-13123411	MD03G1132200_novel01	MD03G1132200,MD03G1132200_novel01
Chr03	MD03G1136100	-	A3	13676015-13674541	MD03G1136100,MD03G1136100_novel03	MD03G1136100_novel02,MD03G1136100_novel03,MD03G1136100
Chr03	MD03G1137000	-	A3	13777316-13777315	MD03G1137000_novel78	MD03G1137000_novel66,MD03G1137000_novel78
Chr03	MD03G1137000	-	A3	13791632-13791618	MD03G1137000_novel29,MD03G1137000_novel66,MD03G1137000_novel67,MD03G1137000_novel60,MD03G1137000_novel61,MD03G1137000_novel62,MD03G1137000_novel20,MD03G1137000_novel21,MD03G1137000_novel22,MD03G1137000_novel23,MD03G1137000_novel24,MD03G1137000_novel25,MD03G1137000_novel26,MD03G1137000_novel27,MD03G1137000_novel11,MD03G1137000_novel10,MD03G1137000_novel12,MD03G1137000_novel15,MD03G1137000_novel14,…	MD03G1137000_novel28,MD03G1137000_novel65,MD03G1137000_novel91,MD03G1137000_novel78,MD03G1137000_novel67,MD03G1137000_novel68,MD03G1137000_novel66,MD03G1137000_novel74,MD03G1137000,MD03G1137000_novel24,MD03G1137000_novel46,MD03G1137000_novel03,MD03G1137000_novel89,MD03G1137000_novel36,MD03G1137000_novel10,MD03G1137000_novel49,MD03G1137000_novel79,MD03G1137000_novel75,MD03G1137000_novel31,MD03G113…
Chr03	MD03G1137000	-	A3	13792598-13792595	MD03G1137000_novel45,MD03G1137000_novel08,MD03G1137000_novel85	MD03G1137000_novel65,MD03G1137000_novel91,MD03G1137000_novel78,MD03G1137000_novel67,MD03G1137000_novel68,MD03G1137000_novel66,MD03G1137000_novel74,MD03G1137000,MD03G1137000_novel24,MD03G1137000_novel03,MD03G1137000_novel89,MD03G1137000_novel81,MD03G1137000_novel36,MD03G1137000_novel10,MD03G1137000_novel49,MD03G1137000_novel79,MD03G1137000_novel75,MD03G1137000_novel31,MD03G1137000_novel25,MD03G113…
Chr03	MD03G1137000	-	A3	13794117-13794098	MD03G1137000_novel25	MD03G1137000_novel65,MD03G1137000_novel78,MD03G1137000_novel67,MD03G1137000_novel68,MD03G1137000_novel66,MD03G1137000_novel74,MD03G1137000,MD03G1137000_novel24,MD03G1137000_novel46,MD03G1137000_novel03,MD03G1137000_novel81,MD03G1137000_novel36,MD03G1137000_novel10,MD03G1137000_novel49,MD03G1137000_novel79,MD03G1137000_novel75,MD03G1137000_novel31,MD03G1137000_novel26,MD03G1137000_novel11,MD03G113…
Chr03	MD03G1137000	-	A3	13794574-13794561	MD03G1137000_novel41	MD03G1137000_novel65,MD03G1137000_novel78,MD03G1137000_novel67,MD03G1137000_novel68,MD03G1137000_novel66,MD03G1137000_novel74,MD03G1137000,MD03G1137000_novel24,MD03G1137000_novel46,MD03G1137000_novel03,MD03G1137000_novel81,MD03G1137000_novel36,MD03G1137000_novel10,MD03G1137000_novel79,MD03G1137000_novel75,MD03G1137000_novel31,MD03G1137000_novel25,MD03G1137000_novel26,MD03G1137000_novel11,MD03G113…
Chr03	MD03G1137000	-	A3	13794793-13794778	MD03G1137000_novel36	MD03G1137000_novel65,MD03G1137000_novel78,MD03G1137000_novel67,MD03G1137000_novel68,MD03G1137000_novel66,MD03G1137000_novel74,MD03G1137000,MD03G1137000_novel24,MD03G1137000_novel46,MD03G1137000_novel03,MD03G1137000_novel81,MD03G1137000_novel10,MD03G1137000_novel49,MD03G1137000_novel79,MD03G1137000_novel75,MD03G1137000_novel31,MD03G1137000_novel25,MD03G1137000_novel26,MD03G1137000_novel11,MD03G113…
Chr03	MD03G1137000	-	A3	13797058-13797026	MD03G1137000_novel18	MD03G1137000_novel65,MD03G1137000_novel78,MD03G1137000_novel67,MD03G1137000_novel68,MD03G1137000_novel66,MD03G1137000_novel74,MD03G1137000,MD03G1137000_novel24,MD03G1137000_novel46,MD03G1137000_novel03,MD03G1137000_novel36,MD03G1137000_novel10,MD03G1137000_novel49,MD03G1137000_novel75,MD03G1137000_novel31,MD03G1137000_novel25,MD03G1137000_novel26,MD03G1137000_novel11,MD03G1137000_novel12,MD03G113…
Chr03	MD03G1137000	-	A3	13797543-13797465	MD03G1137000_novel22	MD03G1137000_novel65,MD03G1137000_novel68,MD03G1137000_novel66,MD03G1137000_novel74,MD03G1137000,MD03G1137000_novel24,MD03G1137000_novel46,MD03G1137000_novel03,MD03G1137000_novel36,MD03G1137000_novel10,MD03G1137000_novel49,MD03G1137000_novel75,MD03G1137000_novel31,MD03G1137000_novel25,MD03G1137000_novel26,MD03G1137000_novel11,MD03G1137000_novel12,MD03G1137000_novel45,MD03G1137000_novel33,MD03G113…
Chr03	MD03G1138000	+	A3	14103848-14103868	MD03G1138000,MD03G1138000_novel03	MD03G1138000_novel01,MD03G1138000,MD03G1138000_novel03
Chr03	MD03G1138500	+	A3	14220116-14220128	MD03G1138500	MD03G1138500_novel01,MD03G1138500_novel05,MD03G1138500_novel11,MD03G1138500
Chr03	MD03G1138500	+	A3	14220116-14220146	MD03G1138500_novel10	MD03G1138500_novel01,MD03G1138500_novel05,MD03G1138500_novel11,MD03G1138500_novel10
Chr03	MD03G1138500	+	A3	14220116-14220155	MD03G1138500_novel15	MD03G1138500_novel01,MD03G1138500_novel05,MD03G1138500_novel11,MD03G1138500_novel15
Chr03	MD03G1138500	+	A3	14220128-14220146	MD03G1138500_novel10	MD03G1138500,MD03G1138500_novel10
Chr03	MD03G1138500	+	A3	14220128-14220155	MD03G1138500_novel15	MD03G1138500,MD03G1138500_novel15
Chr03	MD03G1138500	+	A3	14220146-14220155	MD03G1138500_novel15	MD03G1138500_novel10,MD03G1138500_novel15
Chr03	MD03G1140500	+	A3	14771541-14771544	MD03G1140500	MD03G1140500_novel01,MD03G1140500
Chr03	MD03G1140500	+	A3	14772255-14772265	MD03G1140500	MD03G1140500_novel01,MD03G1140500
Chr03	MD03G1142300	+	A3	15132467-15132530	MD03G1142300_novel01	MD03G1142300,MD03G1142300_novel01
Chr03	MD03G1143400	+	A3	15377117-15377148	MD03G1143400_novel05	MD03G1143400_novel01,MD03G1143400,MD03G1143400_novel02,MD03G1143400_novel03,MD03G1143400_novel04,MD03G1143400_novel06,MD03G1143400_novel05
Chr03	MD03G1143400	+	A3	15380879-15380897	MD03G1143400_novel10,MD03G1143400,MD03G1143400_novel05,MD03G1143400_novel04,MD03G1143400_novel07,MD03G1143400_novel06,MD03G1143400_novel01,MD03G1143400_novel03,MD03G1143400_novel02,MD03G1143400_novel09	MD03G1143400_novel08,MD03G1143400_novel01,MD03G1143400,MD03G1143400_novel02,MD03G1143400_novel03,MD03G1143400_novel04,MD03G1143400_novel05,MD03G1143400_novel06,MD03G1143400_novel07,MD03G1143400_novel09,MD03G1143400_novel10
Chr03	MD03G1143400	+	A3	15381325-15381329	MD03G1143400_novel07	MD03G1143400_novel01,MD03G1143400,MD03G1143400_novel02,MD03G1143400_novel03,MD03G1143400_novel04,MD03G1143400_novel05,MD03G1143400_novel06,MD03G1143400_novel08,MD03G1143400_novel09,MD03G1143400_novel10,MD03G1143400_novel07
Chr03	MD03G1145900	-	A3	15929160-15929127	MD03G1145900,MD03G1145900_novel03	MD03G1145900_novel01,MD03G1145900,MD03G1145900_novel03
Chr03	MD03G1145900	-	A3	15929969-15929915	MD03G1145900,MD03G1145900_novel01	MD03G1145900_novel02,MD03G1145900,MD03G1145900_novel01
Chr03	MD03G1149500	+	A3	16634564-16634665	MD03G1149500_novel02	MD03G1149500_novel03,MD03G1149500,MD03G1149500_novel04,MD03G1149500_novel02
Chr03	MD03G1149500	+	A3	16634564-16634675	MD03G1149500_novel01	MD03G1149500_novel03,MD03G1149500,MD03G1149500_novel04,MD03G1149500_novel01
Chr03	MD03G1149500	+	A3	16634665-16634675	MD03G1149500_novel01	MD03G1149500_novel02,MD03G1149500_novel01
Chr03	MD03G1150100	+	A3	16709009-16709019	MD03G1150100_novel01	MD03G1150100,MD03G1150100_novel02,MD03G1150100_novel01
Chr03	MD03G1150700	-	A3	16849028-16849023	MD03G1150700_novel01	MD03G1150700,MD03G1150700_novel02,MD03G1150700_novel03,MD03G1150700_novel01
Chr03	MD03G1154000	+	A3	17613993-17614041	MD03G1154000_novel02	MD03G1154000_novel01,MD03G1154000,MD03G1154000_novel03,MD03G1154000_novel04,MD03G1154000_novel08,MD03G1154000_novel09,MD03G1154000_novel10,MD03G1154000_novel02
Chr03	MD03G1154000	+	A3	17614590-17614619	MD03G1154000,MD03G1154000_novel09,MD03G1154000_novel08,MD03G1154000_novel07,MD03G1154000_novel01,MD03G1154000_novel03,MD03G1154000_novel02,MD03G1154000_novel10	MD03G1154000_novel04,MD03G1154000_novel01,MD03G1154000_novel02,MD03G1154000,MD03G1154000_novel03,MD03G1154000_novel07,MD03G1154000_novel08,MD03G1154000_novel09,MD03G1154000_novel10
Chr03	MD03G1154600	-	A3	17732052-17732024	MD03G1154600_novel01	MD03G1154600_novel02,MD03G1154600_novel01
Chr03	MD03G1154600	-	A3	17732064-17732024	MD03G1154600_novel01	MD03G1154600_novel03,MD03G1154600_novel01
Chr03	MD03G1154600	-	A3	17732064-17732052	MD03G1154600_novel02	MD03G1154600_novel03,MD03G1154600_novel02
Chr03	MD03G1156600	-	A3	18386779-18386765	MD03G1156600_novel08,MD03G1156600_novel05	MD03G1156600,MD03G1156600_novel01,MD03G1156600_novel02,MD03G1156600_novel09,MD03G1156600_novel06,MD03G1156600_novel07,MD03G1156600_novel03,MD03G1156600_novel04,MD03G1156600_novel05,MD03G1156600_novel08
Chr03	MD03G1156600	-	A3	18387452-18387429	MD03G1156600_novel04	MD03G1156600,MD03G1156600_novel02,MD03G1156600_novel09,MD03G1156600_novel06,MD03G1156600_novel07,MD03G1156600_novel03,MD03G1156600_novel05,MD03G1156600_novel08,MD03G1156600_novel04
Chr03	MD03G1157000	+	A3	18640262-18640265	MD03G1157000_novel05,MD03G1157000	MD03G1157000_novel03,MD03G1157000_novel04,MD03G1157000_novel06,MD03G1157000,MD03G1157000_novel05
Chr03	MD03G1158100	+	A3	18791165-18791188	MD03G1158100_novel07	MD03G1158100_novel08,MD03G1158100_novel09,MD03G1158100_novel10,MD03G1158100_novel11,MD03G1158100,MD03G1158100_novel07
Chr03	MD03G1158100	+	A3	18791165-18791768	MD03G1158100_novel05	MD03G1158100,MD03G1158100_novel05
Chr03	MD03G1158100	+	A3	18791165-18791993	MD03G1158100_novel12	MD03G1158100,MD03G1158100_novel12
Chr03	MD03G1158100	+	A3	18791165-18792018	MD03G1158100_novel04	MD03G1158100,MD03G1158100_novel04
Chr03	MD03G1158100	+	A3	18791165-18792058	MD03G1158100_novel01,MD03G1158100_novel02	MD03G1158100,MD03G1158100_novel01,MD03G1158100_novel02
Chr03	MD03G1158100	+	A3	18791768-18791993	MD03G1158100_novel12	MD03G1158100_novel05,MD03G1158100_novel12
Chr03	MD03G1158100	+	A3	18791768-18792018	MD03G1158100_novel04	MD03G1158100_novel05,MD03G1158100_novel04
Chr03	MD03G1158100	+	A3	18791768-18792058	MD03G1158100_novel01,MD03G1158100_novel02	MD03G1158100_novel05,MD03G1158100_novel01,MD03G1158100_novel02
Chr03	MD03G1158100	+	A3	18791993-18792018	MD03G1158100_novel04	MD03G1158100_novel12,MD03G1158100_novel04
Chr03	MD03G1158100	+	A3	18791993-18792058	MD03G1158100_novel02,MD03G1158100_novel01	MD03G1158100_novel12,MD03G1158100_novel01,MD03G1158100_novel02
Chr03	MD03G1158100	+	A3	18792018-18792058	MD03G1158100_novel01,MD03G1158100_novel02	MD03G1158100_novel04,MD03G1158100_novel01,MD03G1158100_novel02
Chr03	MD03G1158100	+	A3	18791993-18792018	MD03G1158100_novel11	MD03G1158100_novel07,MD03G1158100_novel08,MD03G1158100_novel06,MD03G1158100_novel11
Chr03	MD03G1158100	+	A3	18791993-18792058	MD03G1158100_novel09,MD03G1158100_novel10	MD03G1158100_novel07,MD03G1158100_novel08,MD03G1158100_novel06,MD03G1158100_novel09,MD03G1158100_novel10
Chr03	MD03G1158100	+	A3	18792018-18792058	MD03G1158100_novel09,MD03G1158100_novel10	MD03G1158100_novel11,MD03G1158100_novel09,MD03G1158100_novel10
Chr03	MD03G1158100	+	A3	18806601-18806602	MD03G1158100_novel12	MD03G1158100_novel07,MD03G1158100_novel12
Chr03	MD03G1161100	-	A3	19404802-19404799	MD03G1161100_novel01	MD03G1161100,MD03G1161100_novel07,MD03G1161100_novel08,MD03G1161100_novel02,MD03G1161100_novel03,MD03G1161100_novel06,MD03G1161100_novel05,MD03G1161100_novel01
Chr03	MD03G1161400	+	A3	19479935-19479938	MD03G1161400	MD03G1161400_novel01,MD03G1161400_novel03,MD03G1161400_novel05,MD03G1161400_novel06,MD03G1161400_novel07,MD03G1161400_novel09,MD03G1161400_novel10,MD03G1161400_novel11,MD03G1161400
Chr03	MD03G1161400	+	A3	19481193-19481195	MD03G1161400_novel10	MD03G1161400_novel01,MD03G1161400_novel03,MD03G1161400_novel02,MD03G1161400_novel04,MD03G1161400,MD03G1161400_novel05,MD03G1161400_novel06,MD03G1161400_novel07,MD03G1161400_novel09,MD03G1161400_novel12,MD03G1161400_novel11,MD03G1161400_novel13,MD03G1161400_novel10
Chr03	MD03G1161400	+	A3	19482435-19482462	MD03G1161400,MD03G1161400_novel13,MD03G1161400_novel11,MD03G1161400_novel07,MD03G1161400_novel02	MD03G1161400_novel01,MD03G1161400_novel10,MD03G1161400_novel14,MD03G1161400_novel02,MD03G1161400,MD03G1161400_novel07,MD03G1161400_novel11,MD03G1161400_novel13
Chr03	MD03G1161700	+	A3	19557429-19557431	MD03G1161700_novel09	MD03G1161700_novel01,MD03G1161700_novel06,MD03G1161700_novel08,MD03G1161700_novel10,MD03G1161700_novel09
Chr03	MD03G1163000	+	A3	20296518-20296570	MD03G1163000_novel01	MD03G1163000,MD03G1163000_novel02,MD03G1163000_novel03,MD03G1163000_novel01
Chr03	MD03G1163400	+	A3	20331859-20331873	MD03G1163400_novel03	MD03G1163400,MD03G1163400_novel03
Chr03	MD03G1163600	-	A3	20387697-20387681	MD03G1163600_novel24,MD03G1163600_novel01,MD03G1163600_novel03,MD03G1163600_novel09,MD03G1163600,MD03G1163600_novel02,MD03G1163600_novel22,MD03G1163600_novel05,MD03G1163600_novel04,MD03G1163600_novel23,MD03G1163600_novel21,MD03G1163600_novel20,MD03G1163600_novel07,MD03G1163600_novel25,MD03G1163600_novel19,MD03G1163600_novel16,MD03G1163600_novel17,MD03G1163600_novel14,MD03G1163600_novel15,MD03G116…	MD03G1163600_novel08,MD03G1163600_novel06,MD03G1163600_novel02,MD03G1163600,MD03G1163600_novel14,MD03G1163600_novel03,MD03G1163600_novel10,MD03G1163600_novel20,MD03G1163600_novel12,MD03G1163600_novel21,MD03G1163600_novel24,MD03G1163600_novel01,MD03G1163600_novel16,MD03G1163600_novel25,MD03G1163600_novel15,MD03G1163600_novel13,MD03G1163600_novel22,MD03G1163600_novel19,MD03G1163600_novel05,MD03G116…
Chr03	MD03G1163600	-	A3	20388628-20388625	MD03G1163600	MD03G1163600_novel02,MD03G1163600_novel14,MD03G1163600_novel03,MD03G1163600_novel10,MD03G1163600_novel20,MD03G1163600_novel12,MD03G1163600_novel21,MD03G1163600_novel24,MD03G1163600_novel01,MD03G1163600_novel16,MD03G1163600_novel25,MD03G1163600_novel08,MD03G1163600_novel15,MD03G1163600_novel06,MD03G1163600_novel22,MD03G1163600_novel19,MD03G1163600_novel05,MD03G1163600_novel04,MD03G1163600_novel11,…
Chr03	MD03G1163600	-	A3	20390116-20390037	MD03G1163600_novel05,MD03G1163600_novel09,MD03G1163600_novel19,MD03G1163600_novel13,MD03G1163600_novel11	MD03G1163600_novel02,MD03G1163600,MD03G1163600_novel03,MD03G1163600_novel10,MD03G1163600_novel20,MD03G1163600_novel12,MD03G1163600_novel21,MD03G1163600_novel01,MD03G1163600_novel16,MD03G1163600_novel25,MD03G1163600_novel08,MD03G1163600_novel15,MD03G1163600_novel06,MD03G1163600_novel22,MD03G1163600_novel17,MD03G1163600_novel23,MD03G1163600_novel07,MD03G1163600_novel26,MD03G1163600_novel27,MD03G116…
Chr03	MD03G1163600	-	A3	20391979-20391208	MD03G1163600_novel10	MD03G1163600_novel16,MD03G1163600_novel22,MD03G1163600_novel17,MD03G1163600_novel27,MD03G1163600_novel10
Chr03	MD03G1163600	-	A3	20392398-20392389	MD03G1163600_novel21	MD03G1163600_novel23,MD03G1163600_novel21
Chr03	MD03G1163600	-	A3	20392398-20392389	MD03G1163600_novel01,MD03G1163600_novel09,MD03G1163600_novel08,MD03G1163600_novel10,MD03G1163600_novel18,MD03G1163600_novel16,MD03G1163600_novel03,MD03G1163600_novel15,MD03G1163600_novel12,MD03G1163600_novel04,MD03G1163600_novel07,MD03G1163600_novel11	MD03G1163600_novel02,MD03G1163600_novel14,MD03G1163600_novel06,MD03G1163600_novel13,MD03G1163600_novel05,MD03G1163600_novel17,MD03G1163600_novel03,MD03G1163600_novel10,MD03G1163600_novel12,MD03G1163600_novel01,MD03G1163600_novel16,MD03G1163600_novel08,MD03G1163600_novel15,MD03G1163600_novel04,MD03G1163600_novel11,MD03G1163600_novel09,MD03G1163600_novel07,MD03G1163600_novel18
Chr03	MD03G1164800	-	A3	21719368-21719341	MD03G1164800_novel02	MD03G1164800,MD03G1164800_novel07,MD03G1164800_novel02
Chr03	MD03G1164800	-	A3	21719385-21719341	MD03G1164800_novel02	MD03G1164800_novel03,MD03G1164800_novel02
Chr03	MD03G1164800	-	A3	21719385-21719368	MD03G1164800_novel07,MD03G1164800_novel04,MD03G1164800	MD03G1164800_novel03,MD03G1164800,MD03G1164800_novel07,MD03G1164800_novel04
Chr03	MD03G1164800	-	A3	21720227-21720211	MD03G1164800,MD03G1164800_novel08,MD03G1164800_novel03,MD03G1164800_novel07,MD03G1164800_novel04	MD03G1164800_novel02,MD03G1164800_novel08,MD03G1164800,MD03G1164800_novel07,MD03G1164800_novel03,MD03G1164800_novel04
Chr03	MD03G1165200	-	A3	21860291-21860208	MD03G1165200_novel01	MD03G1165200,MD03G1165200_novel02,MD03G1165200_novel03,MD03G1165200_novel01
Chr03	MD03G1165200	-	A3	21861863-21861841	MD03G1165200	MD03G1165200_novel01,MD03G1165200
Chr03	MD03G1165200	-	A3	21864596-21864573	MD03G1165200_novel03,MD03G1165200_novel01	MD03G1165200,MD03G1165200_novel02,MD03G1165200_novel01,MD03G1165200_novel03
Chr03	MD03G1165400	+	A3	21885396-21885408	MD03G1165400_novel01,MD03G1165400_novel02,MD03G1165400_novel04	MD03G1165400,MD03G1165400_novel05,MD03G1165400_novel06,MD03G1165400_novel01,MD03G1165400_novel02,MD03G1165400_novel04
Chr03	MD03G1165600	+	A3	21972205-21972259	MD03G1165600_novel02	MD03G1165600_novel01,MD03G1165600,MD03G1165600_novel03,MD03G1165600_novel02
Chr03	MD03G1165800	-	A3	22020362-22020353	MD03G1165800_novel03	MD03G1165800_novel04,MD03G1165800_novel02,MD03G1165800_novel03
Chr03	MD03G1167400	-	A3	22386258-22386252	MD03G1167400	MD03G1167400_novel01,MD03G1167400
Chr03	MD03G1168400	+	A3	22793038-22793083	MD03G1168400,MD03G1168400_novel01	MD03G1168400_novel02,MD03G1168400,MD03G1168400_novel01
Chr03	MD03G1168800	-	A3	22833492-22833489	MD03G1168800	MD03G1168800_novel04,MD03G1168800_novel03,MD03G1168800_novel08,MD03G1168800_novel02,MD03G1168800_novel01,MD03G1168800_novel06,MD03G1168800_novel05,MD03G1168800_novel07,MD03G1168800
Chr03	MD03G1169700	+	A3	22984263-22984267	MD03G1169700,MD03G1169700_novel01	MD03G1169700_novel02,MD03G1169700,MD03G1169700_novel01
Chr03	MD03G1169900	+	A3	23031174-23031190	MD03G1169900_novel05,MD03G1169900,MD03G1169900_novel02,MD03G1169900_novel03	MD03G1169900_novel04,MD03G1169900_novel02,MD03G1169900,MD03G1169900_novel03,MD03G1169900_novel05
Chr03	MD03G1170000	+	A3	23051252-23051257	MD03G1170000_novel01	MD03G1170000,MD03G1170000_novel02,MD03G1170000_novel03,MD03G1170000_novel04,MD03G1170000_novel01
Chr03	MD03G1170600	+	A3	23148051-23148062	MD03G1170600_novel01,MD03G1170600	MD03G1170600_novel02,MD03G1170600,MD03G1170600_novel01
Chr03	MD03G1170900	+	A3	23211553-23211556	MD03G1170900	MD03G1170900_novel01,MD03G1170900_novel02,MD03G1170900_novel03,MD03G1170900
Chr03	MD03G1172000	-	A3	23403168-23403160	MD03G1172000_novel01	MD03G1172000,MD03G1172000_novel04,MD03G1172000_novel02,MD03G1172000_novel03,MD03G1172000_novel01
Chr03	MD03G1172100	-	A3	23420401-23420393	MD03G1172100_novel02	MD03G1172100_novel04,MD03G1172100_novel03,MD03G1172100_novel02
Chr03	MD03G1172500	+	A3	23530834-23530859	MD03G1172500_novel01	MD03G1172500_novel02,MD03G1172500_novel01
Chr03	MD03G1173800	-	A3	23776804-23776796	MD03G1173800_novel03	MD03G1173800_novel01,MD03G1173800,MD03G1173800_novel02,MD03G1173800_novel03
Chr03	MD03G1173900	-	A3	23802141-23802109	MD03G1173900	MD03G1173900_novel01,MD03G1173900_novel02,MD03G1173900
Chr03	MD03G1174600	-	A3	23871192-23871167	MD03G1174600_novel05,MD03G1174600_novel03	MD03G1174600_novel06,MD03G1174600_novel01,MD03G1174600_novel03,MD03G1174600_novel05
Chr03	MD03G1175100	-	A3	23920538-23920512	MD03G1175100_novel03	MD03G1175100,MD03G1175100_novel01,MD03G1175100_novel06,MD03G1175100_novel03
Chr03	MD03G1176400	+	A3	24189385-24189389	MD03G1176400_novel03	MD03G1176400,MD03G1176400_novel01,MD03G1176400_novel02,MD03G1176400_novel03
Chr03	MD03G1176400	+	A3	24189797-24189849	MD03G1176400_novel01,MD03G1176400_novel02,MD03G1176400	MD03G1176400_novel03,MD03G1176400_novel04,MD03G1176400,MD03G1176400_novel01,MD03G1176400_novel02
Chr03	MD03G1176400	+	A3	24195015-24195111	MD03G1176400_novel02	MD03G1176400,MD03G1176400_novel02
Chr03	MD03G1176500	+	A3	24218773-24218777	MD03G1176500_novel02	MD03G1176500_novel01,MD03G1176500,MD03G1176500_novel03,MD03G1176500_novel02
Chr03	MD03G1179400	+	A3	24653182-24653225	MD03G1179400_novel01	MD03G1179400,MD03G1179400_novel01
Chr03	MD03G1187400	-	A3	25628708-25628689	MD03G1187400_novel05,MD03G1187400_novel07,MD03G1187400_novel06,MD03G1187400_novel01,MD03G1187400_novel09,MD03G1187400	MD03G1187400_novel08,MD03G1187400_novel07,MD03G1187400,MD03G1187400_novel09,MD03G1187400_novel06,MD03G1187400_novel01,MD03G1187400_novel05
Chr03	MD03G1187400	-	A3	25629026-25629001	MD03G1187400_novel05,MD03G1187400_novel04,MD03G1187400_novel07,MD03G1187400_novel06,MD03G1187400_novel03,MD03G1187400_novel02,MD03G1187400_novel08,MD03G1187400	MD03G1187400_novel09,MD03G1187400_novel07,MD03G1187400,MD03G1187400_novel02,MD03G1187400_novel08,MD03G1187400_novel06,MD03G1187400_novel03,MD03G1187400_novel05,MD03G1187400_novel04
Chr03	MD03G1188300	-	A3	25744402-25744291	MD03G1188300_novel03,MD03G1188300_novel02	MD03G1188300_novel01,MD03G1188300,MD03G1188300_novel03,MD03G1188300_novel02
Chr03	MD03G1188400	+	A3	25763359-25763378	MD03G1188400_novel01	MD03G1188400,MD03G1188400_novel03,MD03G1188400_novel02,MD03G1188400_novel04,MD03G1188400_novel05,MD03G1188400_novel01
Chr03	MD03G1188400	+	A3	25763513-25763546	MD03G1188400_novel01,MD03G1188400_novel03,MD03G1188400_novel04,MD03G1188400_novel05,MD03G1188400	MD03G1188400_novel02,MD03G1188400,MD03G1188400_novel01,MD03G1188400_novel03,MD03G1188400_novel04,MD03G1188400_novel05
Chr03	MD03G1190200	-	A3	26112932-26112846	MD03G1190200,MD03G1190200_novel02	MD03G1190200_novel01,MD03G1190200,MD03G1190200_novel02
Chr03	MD03G1191000	+	A3	26262197-26262210	MD03G1191000_novel01	MD03G1191000_novel03,MD03G1191000,MD03G1191000_novel02,MD03G1191000_novel01
Chr03	MD03G1191000	+	A3	26271501-26271541	MD03G1191000_novel06,MD03G1191000_novel07,MD03G1191000_novel04,MD03G1191000_novel05,MD03G1191000_novel02,MD03G1191000_novel03,MD03G1191000_novel01,MD03G1191000,MD03G1191000_novel08,MD03G1191000_novel09	MD03G1191000_novel10,MD03G1191000_novel01,MD03G1191000_novel03,MD03G1191000,MD03G1191000_novel02,MD03G1191000_novel04,MD03G1191000_novel05,MD03G1191000_novel06,MD03G1191000_novel07,MD03G1191000_novel08,MD03G1191000_novel09
Chr03	MD03G1192600	+	A3	26423080-26423084	MD03G1192600,MD03G1192600_novel03	MD03G1192600_novel01,MD03G1192600_novel02,MD03G1192600,MD03G1192600_novel03
Chr03	MD03G1197400	+	A3	26965846-26965924	MD03G1197400_novel05,MD03G1197400,MD03G1197400_novel08,MD03G1197400_novel01,MD03G1197400_novel12,MD03G1197400_novel11,MD03G1197400_novel06	MD03G1197400_novel07,MD03G1197400_novel02,MD03G1197400_novel15,MD03G1197400,MD03G1197400_novel01,MD03G1197400_novel05,MD03G1197400_novel06,MD03G1197400_novel08,MD03G1197400_novel11,MD03G1197400_novel12
Chr03	MD03G1198000	+	A3	27096496-27096517	MD03G1198000,MD03G1198000_novel03,MD03G1198000_novel02,MD03G1198000_novel04,MD03G1198000_novel07,MD03G1198000_novel06	MD03G1198000_novel05,MD03G1198000_novel02,MD03G1198000,MD03G1198000_novel03,MD03G1198000_novel04,MD03G1198000_novel06,MD03G1198000_novel07
Chr03	MD03G1198000	+	A3	27102539-27102551	MD03G1198000_novel06	MD03G1198000,MD03G1198000_novel03,MD03G1198000_novel04,MD03G1198000_novel05,MD03G1198000_novel07,MD03G1198000_novel08,MD03G1198000_novel09,MD03G1198000_novel06
Chr03	MD03G1198000	+	A3	27102753-27102756	MD03G1198000_novel09,MD03G1198000_novel03	MD03G1198000_novel07,MD03G1198000_novel03,MD03G1198000_novel09
Chr03	MD03G1198400	-	A3	27139855-27139845	MD03G1198400_novel02	MD03G1198400_novel01,MD03G1198400_novel02
Chr03	MD03G1198400	-	A3	27141248-27141230	MD03G1198400_novel02	MD03G1198400_novel01,MD03G1198400,MD03G1198400_novel05,MD03G1198400_novel02
Chr03	MD03G1202000	+	A3	27635994-27636028	MD03G1202000	MD03G1202000_novel02,MD03G1202000
Chr03	MD03G1202100	-	A3	27647296-27647292	MD03G1202100_novel01	MD03G1202100,MD03G1202100_novel01
Chr03	MD03G1202200	-	A3	27654375-27653004	MD03G1202200_novel01,MD03G1202200,MD03G1202200_novel03,MD03G1202200_novel04	MD03G1202200_novel05,MD03G1202200,MD03G1202200_novel04,MD03G1202200_novel01,MD03G1202200_novel03
Chr03	MD03G1202200	-	A3	27655216-27654991	MD03G1202200_novel03	MD03G1202200_novel05,MD03G1202200_novel07,MD03G1202200,MD03G1202200_novel02,MD03G1202200_novel01,MD03G1202200_novel08,MD03G1202200_novel06,MD03G1202200_novel03
Chr03	MD03G1203100	+	A3	27714202-27714228	MD03G1203100_novel02	MD03G1203100,MD03G1203100_novel02
Chr03	MD03G1203100	+	A3	27719363-27719368	MD03G1203100_novel02	MD03G1203100_novel03,MD03G1203100_novel02
Chr03	MD03G1205000	-	A3	28123131-28123082	MD03G1205000_novel02,MD03G1205000_novel01	MD03G1205000,MD03G1205000_novel02,MD03G1205000_novel01
Chr03	MD03G1207200	+	A3	28324211-28324555	MD03G1207200_novel03,MD03G1207200_novel01	MD03G1207200_novel02,MD03G1207200_novel01,MD03G1207200_novel03
Chr03	MD03G1209000	+	A3	28811503-28811514	MD03G1209000_novel02,MD03G1209000_novel06,MD03G1209000_novel07	MD03G1209000_novel01,MD03G1209000_novel03,MD03G1209000_novel04,MD03G1209000_novel05,MD03G1209000,MD03G1209000_novel02,MD03G1209000_novel06,MD03G1209000_novel07
Chr03	MD03G1209000	+	A3	28814321-28814358	MD03G1209000_novel08	MD03G1209000_novel01,MD03G1209000_novel02,MD03G1209000_novel03,MD03G1209000_novel05,MD03G1209000,MD03G1209000_novel06,MD03G1209000_novel07,MD03G1209000_novel09,MD03G1209000_novel08
Chr03	MD03G1209000	+	A3	28815645-28815649	MD03G1209000_novel09	MD03G1209000_novel01,MD03G1209000_novel02,MD03G1209000_novel03,MD03G1209000_novel04,MD03G1209000_novel05,MD03G1209000,MD03G1209000_novel06,MD03G1209000_novel07,MD03G1209000_novel08,MD03G1209000_novel09
Chr03	MD03G1219000	-	A3	30343960-30343954	MD03G1219000_novel03,MD03G1219000_novel01,MD03G1219000	MD03G1219000_novel02,MD03G1219000_novel03,MD03G1219000,MD03G1219000_novel01
Chr03	MD03G1221500	-	A3	30531218-30531193	MD03G1221500	MD03G1221500_novel01,MD03G1221500
Chr03	MD03G1222000	-	A3	30591730-30591565	MD03G1222000_novel01	MD03G1222000,MD03G1222000_novel01
Chr03	MD03G1222200	-	A3	30643871-30643866	MD03G1222200_novel04	MD03G1222200,MD03G1222200_novel05,MD03G1222200_novel01,MD03G1222200_novel03,MD03G1222200_novel02,MD03G1222200_novel04
Chr03	MD03G1222200	-	A3	30645818-30645808	MD03G1222200,MD03G1222200_novel02,MD03G1222200_novel01	MD03G1222200_novel04,MD03G1222200_novel03,MD03G1222200,MD03G1222200_novel01,MD03G1222200_novel02
Chr03	MD03G1224000	+	A3	30909576-30909581	MD03G1224000_novel01	MD03G1224000,MD03G1224000_novel01
Chr03	MD03G1227800	-	A3	31324772-31324741	MD03G1227800_novel02	MD03G1227800,MD03G1227800_novel01,MD03G1227800_novel03,MD03G1227800_novel02
Chr03	MD03G1229100	-	A3	31464852-31464826	MD03G1229100_novel04	MD03G1229100,MD03G1229100_novel01,MD03G1229100_novel07,MD03G1229100_novel03,MD03G1229100_novel05,MD03G1229100_novel08,MD03G1229100_novel04
Chr03	MD03G1229700	-	A3	31513242-31513220	MD03G1229700_novel01	MD03G1229700,MD03G1229700_novel01
Chr03	MD03G1230300	-	A3	31542884-31542873	MD03G1230300_novel03,MD03G1230300_novel02	MD03G1230300_novel01,MD03G1230300,MD03G1230300_novel02,MD03G1230300_novel03
Chr03	MD03G1230300	-	A3	31543735-31543686	MD03G1230300,MD03G1230300_novel03,MD03G1230300_novel02	MD03G1230300_novel01,MD03G1230300_novel02,MD03G1230300,MD03G1230300_novel03
Chr03	MD03G1231300	+	A3	31694369-31694386	MD03G1231300_novel02,MD03G1231300	MD03G1231300_novel01,MD03G1231300,MD03G1231300_novel02
Chr03	MD03G1233800	-	A3	31945011-31945001	MD03G1233800_novel02	MD03G1233800,MD03G1233800_novel01,MD03G1233800_novel02
Chr03	MD03G1237200	-	A3	32237678-32237612	MD03G1237200_novel01,MD03G1237200_novel03,MD03G1237200,MD03G1237200_novel04	MD03G1237200_novel02,MD03G1237200_novel01,MD03G1237200_novel03,MD03G1237200,MD03G1237200_novel04
Chr03	MD03G1237200	-	A3	32249234-32248898	MD03G1237200	MD03G1237200_novel01,MD03G1237200_novel02,MD03G1237200
Chr03	MD03G1238300	+	A3	32348529-32348816	MD03G1238300_novel02	MD03G1238300_novel01,MD03G1238300_novel02
Chr03	MD03G1238600	+	A3	32386113-32386657	MD03G1238600_novel03,MD03G1238600,MD03G1238600_novel08,MD03G1238600_novel10	MD03G1238600_novel02,MD03G1238600,MD03G1238600_novel03,MD03G1238600_novel08,MD03G1238600_novel10
Chr03	MD03G1240000	+	A3	32546490-32546493	MD03G1240000	MD03G1240000_novel01,MD03G1240000_novel03,MD03G1240000_novel02,MD03G1240000
Chr03	MD03G1240000	+	A3	32547919-32548030	MD03G1240000,MD03G1240000_novel02	MD03G1240000_novel01,MD03G1240000,MD03G1240000_novel02
Chr03	MD03G1240200	-	A3	32557245-32557236	MD03G1240200_novel06,MD03G1240200_novel05,MD03G1240200_novel04,MD03G1240200_novel02,MD03G1240200_novel01,MD03G1240200	MD03G1240200_novel03,MD03G1240200,MD03G1240200_novel04,MD03G1240200_novel06,MD03G1240200_novel05,MD03G1240200_novel01,MD03G1240200_novel02
Chr03	MD03G1240200	-	A3	32557633-32557625	MD03G1240200	MD03G1240200_novel04,MD03G1240200
Chr03	MD03G1240200	-	A3	32557633-32557625	MD03G1240200_novel02	MD03G1240200_novel03,MD03G1240200_novel06,MD03G1240200_novel05,MD03G1240200_novel02
Chr03	MD03G1241200	+	A3	32626239-32626242	MD03G1241200	MD03G1241200_novel02,MD03G1241200_novel05,MD03G1241200
Chr03	MD03G1242000	-	A3	32689260-32689250	MD03G1242000_novel02	MD03G1242000_novel01,MD03G1242000,MD03G1242000_novel02
Chr03	MD03G1242500	-	A3	32718002-32717977	MD03G1242500_novel01	MD03G1242500,MD03G1242500_novel01
Chr03	MD03G1243500	-	A3	32787389-32787369	MD03G1243500_novel02,MD03G1243500	MD03G1243500_novel03,MD03G1243500_novel01,MD03G1243500,MD03G1243500_novel02
Chr03	MD03G1249900	-	A3	33792247-33792211	MD03G1249900_novel06	MD03G1249900_novel04,MD03G1249900_novel06
Chr03	MD03G1252500	-	A3	33989675-33989641	MD03G1252500_novel02,MD03G1252500	MD03G1252500_novel03,MD03G1252500,MD03G1252500_novel02
Chr03	MD03G1253200	-	A3	34029569-34029198	MD03G1253200_novel01	MD03G1253200_novel03,MD03G1253200_novel02,MD03G1253200_novel01
Chr03	MD03G1255700	-	A3	34298047-34298035	MD03G1255700,MD03G1255700_novel01,MD03G1255700_novel02	MD03G1255700_novel03,MD03G1255700_novel01,MD03G1255700_novel02,MD03G1255700
Chr03	MD03G1255700	-	A3	34299284-34299240	MD03G1255700	MD03G1255700_novel01,MD03G1255700
Chr03	MD03G1257000	-	A3	34432730-34432669	MD03G1257000_novel01	MD03G1257000,MD03G1257000_novel01
Chr03	MD03G1258300	-	A3	34539906-34539902	MD03G1258300_novel07	MD03G1258300_novel01,MD03G1258300_novel02,MD03G1258300_novel03,MD03G1258300_novel05,MD03G1258300,MD03G1258300_novel07
Chr03	MD03G1258500	+	A3	34556225-34556287	MD03G1258500_novel02	MD03G1258500_novel01,MD03G1258500,MD03G1258500_novel02
Chr03	MD03G1258500	+	A3	34561527-34561548	MD03G1258500_novel01	MD03G1258500,MD03G1258500_novel02,MD03G1258500_novel01
Chr03	MD03G1262000	+	A3	34810060-34810074	MD03G1262000_novel02	MD03G1262000,MD03G1262000_novel02
Chr03	MD03G1262000	+	A3	34810185-34810210	MD03G1262000_novel05,MD03G1262000_novel04,MD03G1262000_novel03,MD03G1262000	MD03G1262000_novel02,MD03G1262000_novel04,MD03G1262000_novel03,MD03G1262000_novel05,MD03G1262000
Chr03	MD03G1265800	-	A3	35111513-35111492	MD03G1265800_novel02,MD03G1265800_novel03	MD03G1265800_novel01,MD03G1265800,MD03G1265800_novel02,MD03G1265800_novel03
Chr03	MD03G1266900	-	A3	35182443-35182423	MD03G1266900	MD03G1266900_novel01,MD03G1266900
Chr03	MD03G1267300	+	A3	35230664-35230675	MD03G1267300_novel05,MD03G1267300_novel02,MD03G1267300	MD03G1267300_novel01,MD03G1267300_novel03,MD03G1267300_novel04,MD03G1267300,MD03G1267300_novel02,MD03G1267300_novel05
Chr03	MD03G1268300	+	A3	35305305-35305316	MD03G1268300_novel01	MD03G1268300,MD03G1268300_novel03,MD03G1268300_novel04,MD03G1268300_novel05,MD03G1268300_novel01
Chr03	MD03G1268400	+	A3	35309867-35309908	MD03G1268400_novel10	MD03G1268400,MD03G1268400_novel01,MD03G1268400_novel02,MD03G1268400_novel04,MD03G1268400_novel03,MD03G1268400_novel06,MD03G1268400_novel05,MD03G1268400_novel07,MD03G1268400_novel08,MD03G1268400_novel09,MD03G1268400_novel11,MD03G1268400_novel13,MD03G1268400_novel10
Chr03	MD03G1269000	-	A3	35362909-35362901	MD03G1269000_novel01	MD03G1269000,MD03G1269000_novel01
Chr03	MD03G1269000	-	A3	35362985-35362901	MD03G1269000_novel01	MD03G1269000_novel02,MD03G1269000_novel01
Chr03	MD03G1269000	-	A3	35362985-35362909	MD03G1269000	MD03G1269000_novel02,MD03G1269000
Chr03	MD03G1269000	-	A3	35362989-35362901	MD03G1269000_novel01	MD03G1269000_novel03,MD03G1269000_novel01
Chr03	MD03G1269000	-	A3	35362989-35362909	MD03G1269000	MD03G1269000_novel03,MD03G1269000
Chr03	MD03G1269000	-	A3	35362989-35362985	MD03G1269000_novel02	MD03G1269000_novel03,MD03G1269000_novel02
Chr03	MD03G1270500	+	A3	35438093-35438114	MD03G1270500	MD03G1270500_novel01,MD03G1270500
Chr03	MD03G1270500	+	A3	35438093-35438169	MD03G1270500_novel02	MD03G1270500_novel01,MD03G1270500_novel02
Chr03	MD03G1270500	+	A3	35438114-35438169	MD03G1270500_novel02	MD03G1270500,MD03G1270500_novel02
Chr03	MD03G1270800	+	A3	35445999-35446369	MD03G1270800	MD03G1270800_novel01,MD03G1270800_novel03,MD03G1270800_novel04,MD03G1270800
Chr03	MD03G1272700	+	A3	35610246-35610455	MD03G1272700	MD03G1272700_novel02,MD03G1272700
Chr03	MD03G1274100	+	A3	35711755-35711765	MD03G1274100_novel06	MD03G1274100_novel01,MD03G1274100_novel02,MD03G1274100,MD03G1274100_novel04,MD03G1274100_novel05,MD03G1274100_novel03,MD03G1274100_novel07,MD03G1274100_novel08,MD03G1274100_novel06
Chr03	MD03G1275000	-	A3	35796150-35796136	MD03G1275000	MD03G1275000_novel04,MD03G1275000_novel03,MD03G1275000
Chr03	MD03G1275000	-	A3	35798505-35798463	MD03G1275000_novel02	MD03G1275000,MD03G1275000_novel04,MD03G1275000_novel03,MD03G1275000_novel01,MD03G1275000_novel02
Chr03	MD03G1275000	-	A3	35800185-35800146	MD03G1275000_novel01,MD03G1275000_novel03,MD03G1275000_novel02,MD03G1275000	MD03G1275000_novel04,MD03G1275000,MD03G1275000_novel03,MD03G1275000_novel02,MD03G1275000_novel01
Chr03	MD03G1276200	+	A3	35874786-35874790	MD03G1276200	MD03G1276200_novel01,MD03G1276200_novel02,MD03G1276200
Chr03	MD03G1280300	-	A3	36161505-36161435	MD03G1280300	MD03G1280300_novel01,MD03G1280300
Chr03	MD03G1280600	+	A3	36171705-36171715	MD03G1280600_novel03,MD03G1280600_novel01	MD03G1280600,MD03G1280600_novel01,MD03G1280600_novel03
Chr03	MD03G1280600	+	A3	36172500-36172521	MD03G1280600_novel01	MD03G1280600,MD03G1280600_novel02,MD03G1280600_novel01
Chr03	MD03G1280600	+	A3	36173207-36173263	MD03G1280600,MD03G1280600_novel02,MD03G1280600_novel01	MD03G1280600_novel03,MD03G1280600,MD03G1280600_novel01,MD03G1280600_novel02
Chr03	MD03G1280600	+	A3	36174132-36174136	MD03G1280600_novel01	MD03G1280600,MD03G1280600_novel02,MD03G1280600_novel03,MD03G1280600_novel01
Chr03	MD03G1282400	-	A3	36303272-36303264	MD03G1282400	MD03G1282400_novel01,MD03G1282400
Chr03	MD03G1283100	-	A3	36332602-36332539	MD03G1283100	MD03G1283100_novel03,MD03G1283100
Chr03	MD03G1283100	-	A3	36332614-36332539	MD03G1283100	MD03G1283100_novel02,MD03G1283100
Chr03	MD03G1283100	-	A3	36332614-36332602	MD03G1283100_novel03	MD03G1283100_novel02,MD03G1283100_novel03
Chr03	MD03G1284200	-	A3	36447282-36447248	MD03G1284200,MD03G1284200_novel05,MD03G1284200_novel04,MD03G1284200_novel02,MD03G1284200_novel01	MD03G1284200_novel03,MD03G1284200_novel01,MD03G1284200_novel02,MD03G1284200,MD03G1284200_novel04,MD03G1284200_novel05
Chr03	MD03G1284300	-	A3	36456610-36456597	MD03G1284300_novel02	MD03G1284300_novel04,MD03G1284300,MD03G1284300_novel01,MD03G1284300_novel05,MD03G1284300_novel03,MD03G1284300_novel02
Chr03	MD03G1284300	-	A3	36456615-36456597	MD03G1284300_novel02	MD03G1284300_novel06,MD03G1284300_novel02
Chr03	MD03G1284300	-	A3	36456615-36456610	MD03G1284300_novel03,MD03G1284300_novel01,MD03G1284300_novel04,MD03G1284300_novel05,MD03G1284300	MD03G1284300_novel06,MD03G1284300_novel04,MD03G1284300,MD03G1284300_novel01,MD03G1284300_novel05,MD03G1284300_novel03
Chr03	MD03G1284300	-	A3	36457265-36457233	MD03G1284300_novel02	MD03G1284300_novel04,MD03G1284300,MD03G1284300_novel01,MD03G1284300_novel05,MD03G1284300_novel03,MD03G1284300_novel02
Chr03	MD03G1284300	-	A3	36458105-36458090	MD03G1284300_novel02,MD03G1284300	MD03G1284300_novel01,MD03G1284300_novel03,MD03G1284300,MD03G1284300_novel02
Chr03	MD03G1284800	+	A3	36492168-36492206	MD03G1284800	MD03G1284800_novel01,MD03G1284800
Chr03	MD03G1285800	+	A3	36540009-36540246	MD03G1285800_novel06,MD03G1285800_novel07	MD03G1285800_novel08,MD03G1285800_novel10,MD03G1285800_novel06,MD03G1285800_novel07
Chr03	MD03G1285800	+	A3	36540246-36540303	MD03G1285800_novel01	MD03G1285800,MD03G1285800_novel04,MD03G1285800_novel09,MD03G1285800_novel11,MD03G1285800_novel02,MD03G1285800_novel03,MD03G1285800_novel05,MD03G1285800_novel12,MD03G1285800_novel13,MD03G1285800_novel01
Chr03	MD03G1285800	+	A3	36543202-36543206	MD03G1285800_novel07	MD03G1285800_novel01,MD03G1285800,MD03G1285800_novel04,MD03G1285800_novel06,MD03G1285800_novel08,MD03G1285800_novel10,MD03G1285800_novel11,MD03G1285800_novel02,MD03G1285800_novel05,MD03G1285800_novel12,MD03G1285800_novel13,MD03G1285800_novel14,MD03G1285800_novel15,MD03G1285800_novel16,MD03G1285800_novel07
Chr03	MD03G1285800	+	A3	36544639-36544653	MD03G1285800_novel06,MD03G1285800_novel07,MD03G1285800_novel05,MD03G1285800_novel02,MD03G1285800_novel03,MD03G1285800_novel17,MD03G1285800_novel01,MD03G1285800_novel18,MD03G1285800_novel11,MD03G1285800,MD03G1285800_novel08,MD03G1285800_novel09,MD03G1285800_novel12,MD03G1285800_novel15,MD03G1285800_novel14,MD03G1285800_novel10,MD03G1285800_novel16,MD03G1285800_novel04	MD03G1285800_novel13,MD03G1285800_novel01,MD03G1285800,MD03G1285800_novel04,MD03G1285800_novel06,MD03G1285800_novel07,MD03G1285800_novel09,MD03G1285800_novel08,MD03G1285800_novel10,MD03G1285800_novel11,MD03G1285800_novel02,MD03G1285800_novel03,MD03G1285800_novel05,MD03G1285800_novel12,MD03G1285800_novel14,MD03G1285800_novel15,MD03G1285800_novel16,MD03G1285800_novel17,MD03G1285800_novel18
Chr03	MD03G1285800	+	A3	36545197-36545305	MD03G1285800_novel05	MD03G1285800_novel01,MD03G1285800,MD03G1285800_novel04,MD03G1285800_novel06,MD03G1285800_novel07,MD03G1285800_novel09,MD03G1285800_novel08,MD03G1285800_novel10,MD03G1285800_novel11,MD03G1285800_novel02,MD03G1285800_novel03,MD03G1285800_novel12,MD03G1285800_novel13,MD03G1285800_novel14,MD03G1285800_novel15,MD03G1285800_novel16,MD03G1285800_novel17,MD03G1285800_novel18,MD03G1285800_novel05
Chr03	MD03G1285800	+	A3	36546330-36546350	MD03G1285800_novel02	MD03G1285800_novel01,MD03G1285800,MD03G1285800_novel04,MD03G1285800_novel06,MD03G1285800_novel07,MD03G1285800_novel09,MD03G1285800_novel08,MD03G1285800_novel10,MD03G1285800_novel11,MD03G1285800_novel03,MD03G1285800_novel05,MD03G1285800_novel12,MD03G1285800_novel13,MD03G1285800_novel14,MD03G1285800_novel15,MD03G1285800_novel16,MD03G1285800_novel17,MD03G1285800_novel18,MD03G1285800_novel02
Chr03	MD03G1287500	-	A3	36655848-36655841	MD03G1287500_novel08,MD03G1287500_novel02,MD03G1287500_novel05	MD03G1287500_novel03,MD03G1287500_novel05,MD03G1287500_novel02,MD03G1287500_novel08
Chr03	MD03G1289100	+	A3	36747378-36747490	MD03G1289100_novel01	MD03G1289100,MD03G1289100_novel01
Chr03	MD03G1291500	+	A3	36903618-36903631	MD03G1291500_novel02,MD03G1291500,MD03G1291500_novel04,MD03G1291500_novel03	MD03G1291500_novel01,MD03G1291500,MD03G1291500_novel02,MD03G1291500_novel03,MD03G1291500_novel04
Chr03	MD03G1292400	+	A3	36940341-36940350	MD03G1292400_novel01	MD03G1292400,MD03G1292400_novel01
Chr03	MD03G1292800	+	A3	36970035-36970210	MD03G1292800	MD03G1292800_novel01,MD03G1292800
Chr03	MD03G1294600	+	A3	37072707-37072754	MD03G1294600_novel01	MD03G1294600,MD03G1294600_novel01
Chr03	MD03G1298700	-	A3	37447999-37447965	MD03G1298700,MD03G1298700_novel03	MD03G1298700_novel02,MD03G1298700_novel03,MD03G1298700
Chr03	MD03G1298700	-	A3	37448846-37448833	MD03G1298700,MD03G1298700_novel04,MD03G1298700_novel03,MD03G1298700_novel02,MD03G1298700_novel01	MD03G1298700_novel06,MD03G1298700_novel03,MD03G1298700_novel01,MD03G1298700,MD03G1298700_novel04,MD03G1298700_novel02
Chr03	MD03G1298900	+	A3	37487360-37487366	MD03G1298900_novel01	MD03G1298900,MD03G1298900_novel01
Chr04	MD04G1001000	+	A3	131496-131510	MD04G1001000_novel04	MD04G1001000_novel01,MD04G1001000,MD04G1001000_novel03,MD04G1001000_novel05,MD04G1001000_novel06,MD04G1001000_novel07,MD04G1001000_novel08,MD04G1001000_novel09,MD04G1001000_novel10,MD04G1001000_novel04
Chr04	MD04G1002000	+	A3	262152-262211	MD04G1002000	MD04G1002000_novel01,MD04G1002000
Chr04	MD04G1002300	-	A3	287551-287455	MD04G1002300_novel07,MD04G1002300_novel02,MD04G1002300,MD04G1002300_novel06,MD04G1002300_novel14,MD04G1002300_novel01,MD04G1002300_novel03,MD04G1002300_novel15,MD04G1002300_novel05,MD04G1002300_novel04,MD04G1002300_novel10,MD04G1002300_novel11,MD04G1002300_novel12,MD04G1002300_novel13	MD04G1002300_novel08,MD04G1002300,MD04G1002300_novel04,MD04G1002300_novel14,MD04G1002300_novel12,MD04G1002300_novel07,MD04G1002300_novel03,MD04G1002300_novel13,MD04G1002300_novel10,MD04G1002300_novel02,MD04G1002300_novel05,MD04G1002300_novel06,MD04G1002300_novel15,MD04G1002300_novel11,MD04G1002300_novel01
Chr04	MD04G1002300	-	A3	292958-292939	MD04G1002300_novel07,MD04G1002300_novel02,MD04G1002300,MD04G1002300_novel06,MD04G1002300_novel14,MD04G1002300_novel01,MD04G1002300_novel15,MD04G1002300_novel12,MD04G1002300_novel04,MD04G1002300_novel10,MD04G1002300_novel11,MD04G1002300_novel05,MD04G1002300_novel08,MD04G1002300_novel13	MD04G1002300_novel03,MD04G1002300,MD04G1002300_novel04,MD04G1002300_novel14,MD04G1002300_novel12,MD04G1002300_novel07,MD04G1002300_novel13,MD04G1002300_novel10,MD04G1002300_novel02,MD04G1002300_novel05,MD04G1002300_novel06,MD04G1002300_novel08,MD04G1002300_novel15,MD04G1002300_novel11,MD04G1002300_novel01
Chr04	MD04G1002300	-	A3	294118-294101	MD04G1002300,MD04G1002300_novel06,MD04G1002300_novel14,MD04G1002300_novel01,MD04G1002300_novel03,MD04G1002300_novel02,MD04G1002300_novel12,MD04G1002300_novel04,MD04G1002300_novel10,MD04G1002300_novel11,MD04G1002300_novel05,MD04G1002300_novel08,MD04G1002300_novel13	MD04G1002300_novel07,MD04G1002300,MD04G1002300_novel04,MD04G1002300_novel14,MD04G1002300_novel12,MD04G1002300_novel03,MD04G1002300_novel13,MD04G1002300_novel10,MD04G1002300_novel02,MD04G1002300_novel05,MD04G1002300_novel06,MD04G1002300_novel08,MD04G1002300_novel11,MD04G1002300_novel01
Chr04	MD04G1002300	-	A3	295868-295858	MD04G1002300_novel04	MD04G1002300,MD04G1002300_novel12,MD04G1002300_novel07,MD04G1002300_novel03,MD04G1002300_novel13,MD04G1002300_novel10,MD04G1002300_novel02,MD04G1002300_novel05,MD04G1002300_novel06,MD04G1002300_novel08,MD04G1002300_novel11,MD04G1002300_novel01,MD04G1002300_novel04
Chr04	MD04G1002300	-	A3	298041-298021	MD04G1002300_novel07,MD04G1002300,MD04G1002300_novel06,MD04G1002300_novel01,MD04G1002300_novel03,MD04G1002300_novel12,MD04G1002300_novel04,MD04G1002300_novel10,MD04G1002300_novel11,MD04G1002300_novel09,MD04G1002300_novel05,MD04G1002300_novel08	MD04G1002300_novel02,MD04G1002300,MD04G1002300_novel04,MD04G1002300_novel12,MD04G1002300_novel07,MD04G1002300_novel03,MD04G1002300_novel10,MD04G1002300_novel05,MD04G1002300_novel06,MD04G1002300_novel08,MD04G1002300_novel11,MD04G1002300_novel01,MD04G1002300_novel09
Chr04	MD04G1003700	+	A3	525016-525019	MD04G1003700,MD04G1003700_novel04	MD04G1003700_novel01,MD04G1003700_novel02,MD04G1003700_novel05,MD04G1003700,MD04G1003700_novel04
Chr04	MD04G1003800	-	A3	534177-534150	MD04G1003800,MD04G1003800_novel05,MD04G1003800_novel04,MD04G1003800_novel06,MD04G1003800_novel01,MD04G1003800_novel03	MD04G1003800_novel02,MD04G1003800,MD04G1003800_novel01,MD04G1003800_novel03,MD04G1003800_novel04,MD04G1003800_novel06,MD04G1003800_novel05
Chr04	MD04G1004800	+	A3	603572-603582	MD04G1004800_novel01,MD04G1004800_novel03	MD04G1004800,MD04G1004800_novel02,MD04G1004800_novel04,MD04G1004800_novel06,MD04G1004800_novel07,MD04G1004800_novel08,MD04G1004800_novel09,MD04G1004800_novel05,MD04G1004800_novel10,MD04G1004800_novel11,MD04G1004800_novel03,MD04G1004800_novel01
Chr04	MD04G1005500	+	A3	653062-653077	MD04G1005500,MD04G1005500_novel01,MD04G1005500_novel06	MD04G1005500_novel02,MD04G1005500_novel05,MD04G1005500,MD04G1005500_novel01,MD04G1005500_novel06
Chr04	MD04G1007200	-	A3	845911-845908	MD04G1007200	MD04G1007200_novel01,MD04G1007200
Chr04	MD04G1007800	-	A3	881623-881615	MD04G1007800_novel08,MD04G1007800_novel03,MD04G1007800_novel02,MD04G1007800_novel04,MD04G1007800_novel07,MD04G1007800_novel06,MD04G1007800	MD04G1007800_novel05,MD04G1007800_novel01,MD04G1007800_novel02,MD04G1007800_novel07,MD04G1007800,MD04G1007800_novel06,MD04G1007800_novel08,MD04G1007800_novel04,MD04G1007800_novel03
Chr04	MD04G1007800	-	A3	883524-883520	MD04G1007800_novel07	MD04G1007800_novel02,MD04G1007800,MD04G1007800_novel06,MD04G1007800_novel04,MD04G1007800_novel01,MD04G1007800_novel03,MD04G1007800_novel07
Chr04	MD04G1007800	-	A3	883769-883765	MD04G1007800_novel05,MD04G1007800_novel06	MD04G1007800_novel02,MD04G1007800_novel07,MD04G1007800,MD04G1007800_novel04,MD04G1007800_novel01,MD04G1007800_novel03,MD04G1007800_novel05,MD04G1007800_novel06
Chr04	MD04G1007900	-	A3	891336-891269	MD04G1007900_novel01,MD04G1007900_novel02	MD04G1007900,MD04G1007900_novel09,MD04G1007900_novel08,MD04G1007900_novel10,MD04G1007900_novel03,MD04G1007900_novel07,MD04G1007900_novel04,MD04G1007900_novel01,MD04G1007900_novel02
Chr04	MD04G1008400	-	A3	974182-974157	MD04G1008400_novel11	MD04G1008400,MD04G1008400_novel13,MD04G1008400_novel02,MD04G1008400_novel04,MD04G1008400_novel05,MD04G1008400_novel09,MD04G1008400_novel08,MD04G1008400_novel10,MD04G1008400_novel11
Chr04	MD04G1008400	-	A3	974398-974182	MD04G1008400_novel06,MD04G1008400_novel07	MD04G1008400_novel03,MD04G1008400_novel06,MD04G1008400_novel07
Chr04	MD04G1008400	-	A3	974796-974596	MD04G1008400_novel04,MD04G1008400_novel06	MD04G1008400_novel01,MD04G1008400,MD04G1008400_novel13,MD04G1008400_novel05,MD04G1008400_novel09,MD04G1008400_novel08,MD04G1008400_novel07,MD04G1008400_novel04,MD04G1008400_novel06
Chr04	MD04G1008700	+	A3	991122-991157	MD04G1008700_novel02	MD04G1008700,MD04G1008700_novel03,MD04G1008700_novel02
Chr04	MD04G1010600	-	A3	1158108-1158086	MD04G1010600	MD04G1010600_novel02,MD04G1010600_novel01,MD04G1010600
Chr04	MD04G1014100	+	A3	1592828-1592844	MD04G1014100_novel01	MD04G1014100,MD04G1014100_novel01
Chr04	MD04G1016500	+	A3	1775411-1775485	MD04G1016500_novel07	MD04G1016500_novel03,MD04G1016500_novel07
Chr04	MD04G1016500	+	A3	1776246-1776481	MD04G1016500_novel06,MD04G1016500_novel07,MD04G1016500_novel04,MD04G1016500_novel02,MD04G1016500_novel03,MD04G1016500	MD04G1016500_novel01,MD04G1016500,MD04G1016500_novel02,MD04G1016500_novel03,MD04G1016500_novel04,MD04G1016500_novel06,MD04G1016500_novel07
Chr04	MD04G1016500	+	A3	1780000-1780055	MD04G1016500_novel08	MD04G1016500,MD04G1016500_novel08
Chr04	MD04G1018500	-	A3	2136723-2136709	MD04G1018500_novel02	MD04G1018500,MD04G1018500_novel02
Chr04	MD04G1018700	-	A3	2158360-2158132	MD04G1018700_novel06,MD04G1018700	MD04G1018700_novel05,MD04G1018700_novel04,MD04G1018700,MD04G1018700_novel06
Chr04	MD04G1018700	-	A3	2158366-2158360	MD04G1018700_novel04,MD04G1018700_novel05,MD04G1018700_novel03	MD04G1018700_novel02,MD04G1018700_novel03,MD04G1018700_novel05,MD04G1018700_novel04
Chr04	MD04G1018700	-	A3	2160877-2160872	MD04G1018700_novel06,MD04G1018700_novel02,MD04G1018700_novel03	MD04G1018700,MD04G1018700_novel01,MD04G1018700_novel05,MD04G1018700_novel04,MD04G1018700_novel06,MD04G1018700_novel02,MD04G1018700_novel03
Chr04	MD04G1018900	-	A3	2181996-2181990	MD04G1018900	MD04G1018900_novel01,MD04G1018900_novel02,MD04G1018900
Chr04	MD04G1021500	+	A3	2546968-2546977	MD04G1021500_novel02	MD04G1021500_novel01,MD04G1021500,MD04G1021500_novel03,MD04G1021500_novel02
Chr04	MD04G1021600	-	A3	2561596-2561574	MD04G1021600_novel01	MD04G1021600,MD04G1021600_novel01
Chr04	MD04G1022300	+	A3	2617052-2617114	MD04G1022300_novel02,MD04G1022300_novel01	MD04G1022300,MD04G1022300_novel01,MD04G1022300_novel02
Chr04	MD04G1022400	+	A3	2633422-2633435	MD04G1022400_novel02	MD04G1022400,MD04G1022400_novel02
Chr04	MD04G1023600	+	A3	2717571-2717671	MD04G1023600_novel01	MD04G1023600,MD04G1023600_novel02,MD04G1023600_novel01
Chr04	MD04G1023600	+	A3	2718897-2719077	MD04G1023600_novel01,MD04G1023600	MD04G1023600_novel02,MD04G1023600,MD04G1023600_novel01
Chr04	MD04G1023700	-	A3	2732960-2732942	MD04G1023700_novel01,MD04G1023700_novel02,MD04G1023700_novel03	MD04G1023700,MD04G1023700_novel02,MD04G1023700_novel01,MD04G1023700_novel03
Chr04	MD04G1024200	-	A3	2780569-2780563	MD04G1024200	MD04G1024200_novel01,MD04G1024200_novel02,MD04G1024200
Chr04	MD04G1025900	-	A3	3022911-3022864	MD04G1025900_novel02	MD04G1025900,MD04G1025900_novel09,MD04G1025900_novel01,MD04G1025900_novel10,MD04G1025900_novel08,MD04G1025900_novel03,MD04G1025900_novel06,MD04G1025900_novel04,MD04G1025900_novel02
Chr04	MD04G1028000	+	A3	3197284-3197287	MD04G1028000_novel01	MD04G1028000_novel02,MD04G1028000_novel01
Chr04	MD04G1028800	+	A3	3257983-3258046	MD04G1028800_novel02	MD04G1028800_novel01,MD04G1028800,MD04G1028800_novel03,MD04G1028800_novel04,MD04G1028800_novel05,MD04G1028800_novel06,MD04G1028800_novel07,MD04G1028800_novel02
Chr04	MD04G1033000	+	A3	3748494-3748626	MD04G1033000	MD04G1033000_novel03,MD04G1033000_novel01,MD04G1033000
Chr04	MD04G1033900	-	A3	3813422-3813406	MD04G1033900_novel07	MD04G1033900,MD04G1033900_novel02,MD04G1033900_novel03,MD04G1033900_novel09,MD04G1033900_novel10,MD04G1033900_novel07
Chr04	MD04G1033900	-	A3	3815000-3814981	MD04G1033900_novel07,MD04G1033900_novel06,MD04G1033900_novel05,MD04G1033900_novel04,MD04G1033900_novel02,MD04G1033900_novel01,MD04G1033900,MD04G1033900_novel10,MD04G1033900_novel09	MD04G1033900_novel03,MD04G1033900_novel04,MD04G1033900_novel06,MD04G1033900,MD04G1033900_novel01,MD04G1033900_novel05,MD04G1033900_novel02,MD04G1033900_novel07,MD04G1033900_novel09,MD04G1033900_novel10
Chr04	MD04G1034200	-	A3	3829744-3829582	MD04G1034200_novel01,MD04G1034200_novel02	MD04G1034200,MD04G1034200_novel02,MD04G1034200_novel01
Chr04	MD04G1034400	+	A3	3844347-3844351	MD04G1034400	MD04G1034400_novel01,MD04G1034400
Chr04	MD04G1036400	-	A3	4076836-4076812	MD04G1036400_novel02	MD04G1036400_novel01,MD04G1036400_novel02
Chr04	MD04G1036900	-	A3	4107910-4107888	MD04G1036900_novel04,MD04G1036900_novel05,MD04G1036900_novel07	MD04G1036900_novel06,MD04G1036900_novel04,MD04G1036900_novel07,MD04G1036900_novel05
Chr04	MD04G1036900	-	A3	4108694-4108668	MD04G1036900_novel10	MD04G1036900_novel04,MD04G1036900,MD04G1036900_novel07,MD04G1036900_novel11,MD04G1036900_novel05,MD04G1036900_novel01,MD04G1036900_novel06,MD04G1036900_novel03,MD04G1036900_novel08,MD04G1036900_novel02,MD04G1036900_novel10
Chr04	MD04G1036900	-	A3	4110579-4110498	MD04G1036900_novel14	MD04G1036900_novel13,MD04G1036900_novel14
Chr04	MD04G1036900	-	A3	4112886-4112852	MD04G1036900_novel08,MD04G1036900_novel09,MD04G1036900_novel04,MD04G1036900_novel05,MD04G1036900_novel06,MD04G1036900_novel14,MD04G1036900_novel13,MD04G1036900_novel01,MD04G1036900,MD04G1036900_novel02,MD04G1036900_novel10	MD04G1036900_novel07,MD04G1036900_novel11,MD04G1036900_novel03,MD04G1036900_novel04,MD04G1036900,MD04G1036900_novel13,MD04G1036900_novel05,MD04G1036900_novel09,MD04G1036900_novel01,MD04G1036900_novel06,MD04G1036900_novel10,MD04G1036900_novel08,MD04G1036900_novel02,MD04G1036900_novel14
Chr04	MD04G1036900	-	A3	4114649-4114637	MD04G1036900_novel09,MD04G1036900_novel05,MD04G1036900_novel07,MD04G1036900_novel13,MD04G1036900,MD04G1036900_novel02,MD04G1036900_novel03	MD04G1036900_novel04,MD04G1036900_novel11,MD04G1036900_novel01,MD04G1036900_novel06,MD04G1036900_novel10,MD04G1036900_novel08,MD04G1036900_novel14,MD04G1036900,MD04G1036900_novel07,MD04G1036900_novel13,MD04G1036900_novel05,MD04G1036900_novel09,MD04G1036900_novel03,MD04G1036900_novel02
Chr04	MD04G1037000	-	A3	4124681-4124664	MD04G1037000_novel01,MD04G1037000_novel02,MD04G1037000_novel03	MD04G1037000,MD04G1037000_novel02,MD04G1037000_novel01,MD04G1037000_novel03
Chr04	MD04G1037900	-	A3	4220990-4219966	MD04G1037900_novel01	MD04G1037900_novel02,MD04G1037900_novel01
Chr04	MD04G1040100	-	A3	4693913-4693910	MD04G1040100_novel03	MD04G1040100_novel01,MD04G1040100_novel04,MD04G1040100_novel03
Chr04	MD04G1040400	+	A3	4729154-4729185	MD04G1040400_novel04,MD04G1040400_novel05,MD04G1040400_novel01,MD04G1040400	MD04G1040400_novel02,MD04G1040400_novel03,MD04G1040400_novel01,MD04G1040400,MD04G1040400_novel04,MD04G1040400_novel05
Chr04	MD04G1040900	-	A3	4785319-4785235	MD04G1040900,MD04G1040900_novel02	MD04G1040900_novel01,MD04G1040900,MD04G1040900_novel02
Chr04	MD04G1042900	+	A3	5055768-5055784	MD04G1042900_novel03	MD04G1042900_novel01,MD04G1042900_novel02,MD04G1042900,MD04G1042900_novel03
Chr04	MD04G1044700	+	A3	5209328-5209400	MD04G1044700_novel09	MD04G1044700_novel07,MD04G1044700_novel08,MD04G1044700_novel09
Chr04	MD04G1044700	+	A3	5209672-5209758	MD04G1044700_novel02,MD04G1044700_novel01,MD04G1044700_novel06,MD04G1044700_novel05	MD04G1044700,MD04G1044700_novel01,MD04G1044700_novel06,MD04G1044700_novel05,MD04G1044700_novel02
Chr04	MD04G1044800	-	A3	5222916-5222880	MD04G1044800_novel01,MD04G1044800_novel02,MD04G1044800_novel03	MD04G1044800,MD04G1044800_novel01,MD04G1044800_novel03,MD04G1044800_novel02
Chr04	MD04G1045300	+	A3	5276067-5276081	MD04G1045300,MD04G1045300_novel01,MD04G1045300_novel03	MD04G1045300_novel02,MD04G1045300_novel01,MD04G1045300,MD04G1045300_novel03
Chr04	MD04G1045800	+	A3	5322286-5322297	MD04G1045800,MD04G1045800_novel05,MD04G1045800_novel03,MD04G1045800_novel02,MD04G1045800_novel01	MD04G1045800_novel04,MD04G1045800,MD04G1045800_novel01,MD04G1045800_novel03,MD04G1045800_novel02,MD04G1045800_novel05
Chr04	MD04G1045800	+	A3	5323668-5323671	MD04G1045800_novel05	MD04G1045800,MD04G1045800_novel04,MD04G1045800_novel05
Chr04	MD04G1046500	-	A3	5400267-5400260	MD04G1046500_novel02	MD04G1046500,MD04G1046500_novel05,MD04G1046500_novel03,MD04G1046500_novel02
Chr04	MD04G1046600	+	A3	5434008-5434011	MD04G1046600	MD04G1046600_novel01,MD04G1046600
Chr04	MD04G1046800	-	A3	5443981-5443626	MD04G1046800,MD04G1046800_novel03,MD04G1046800_novel05	MD04G1046800_novel02,MD04G1046800_novel01,MD04G1046800,MD04G1046800_novel03,MD04G1046800_novel05
Chr04	MD04G1046900	+	A3	5450106-5450128	MD04G1046900_novel02	MD04G1046900,MD04G1046900_novel01,MD04G1046900_novel02
Chr04	MD04G1049400	+	A3	5789530-5789532	MD04G1049400_novel04,MD04G1049400_novel03,MD04G1049400_novel02,MD04G1049400,MD04G1049400_novel10,MD04G1049400_novel09,MD04G1049400_novel08	MD04G1049400_novel06,MD04G1049400,MD04G1049400_novel02,MD04G1049400_novel03,MD04G1049400_novel04,MD04G1049400_novel08,MD04G1049400_novel09,MD04G1049400_novel10
Chr04	MD04G1049500	-	A3	5794821-5794738	MD04G1049500_novel03	MD04G1049500,MD04G1049500_novel06,MD04G1049500_novel01,MD04G1049500_novel05,MD04G1049500_novel03
Chr04	MD04G1049500	-	A3	5797723-5797713	MD04G1049500_novel01	MD04G1049500,MD04G1049500_novel02,MD04G1049500_novel04,MD04G1049500_novel05,MD04G1049500_novel03,MD04G1049500_novel01
Chr04	MD04G1050100	+	A3	5917222-5917236	MD04G1050100_novel04	MD04G1050100,MD04G1050100_novel01,MD04G1050100_novel03,MD04G1050100_novel02,MD04G1050100_novel05,MD04G1050100_novel04
Chr04	MD04G1052600	-	A3	6196527-6196438	MD04G1052600_novel08	MD04G1052600_novel05,MD04G1052600_novel12,MD04G1052600_novel06,MD04G1052600_novel09,MD04G1052600_novel01,MD04G1052600_novel10,MD04G1052600_novel03,MD04G1052600,MD04G1052600_novel08
Chr04	MD04G1052600	-	A3	6196965-6196933	MD04G1052600_novel05	MD04G1052600_novel04,MD04G1052600_novel06,MD04G1052600_novel07,MD04G1052600_novel08,MD04G1052600_novel09,MD04G1052600_novel11,MD04G1052600_novel02,MD04G1052600_novel01,MD04G1052600_novel03,MD04G1052600,MD04G1052600_novel05
Chr04	MD04G1052600	-	A3	6197248-6197237	MD04G1052600_novel06	MD04G1052600_novel09,MD04G1052600_novel06
Chr04	MD04G1052600	-	A3	6197254-6197170	MD04G1052600_novel03	MD04G1052600_novel04,MD04G1052600_novel05,MD04G1052600_novel07,MD04G1052600_novel08,MD04G1052600_novel11,MD04G1052600_novel10,MD04G1052600,MD04G1052600_novel03
Chr04	MD04G1052700	-	A3	6200108-6200097	MD04G1052700	MD04G1052700_novel02,MD04G1052700
Chr04	MD04G1055600	+	A3	6680601-6680621	MD04G1055600_novel05	MD04G1055600_novel01,MD04G1055600,MD04G1055600_novel04,MD04G1055600_novel03,MD04G1055600_novel02,MD04G1055600_novel07,MD04G1055600_novel08,MD04G1055600_novel09,MD04G1055600_novel05
Chr04	MD04G1055600	+	A3	6680601-6681125	MD04G1055600_novel06	MD04G1055600_novel01,MD04G1055600_novel06
Chr04	MD04G1055600	+	A3	6691048-6691146	MD04G1055600_novel06	MD04G1055600,MD04G1055600_novel04,MD04G1055600_novel03,MD04G1055600_novel02,MD04G1055600_novel05,MD04G1055600_novel07,MD04G1055600_novel08,MD04G1055600_novel09,MD04G1055600_novel06
Chr04	MD04G1055600	+	A3	6693911-6693914	MD04G1055600_novel04,MD04G1055600_novel05,MD04G1055600_novel06,MD04G1055600_novel07,MD04G1055600_novel03,MD04G1055600_novel10,MD04G1055600_novel08,MD04G1055600_novel09,MD04G1055600	MD04G1055600_novel02,MD04G1055600,MD04G1055600_novel04,MD04G1055600_novel03,MD04G1055600_novel06,MD04G1055600_novel05,MD04G1055600_novel07,MD04G1055600_novel08,MD04G1055600_novel09,MD04G1055600_novel10
Chr04	MD04G1055600	+	A3	6700198-6700217	MD04G1055600_novel03	MD04G1055600,MD04G1055600_novel04,MD04G1055600_novel02,MD04G1055600_novel06,MD04G1055600_novel05,MD04G1055600_novel07,MD04G1055600_novel08,MD04G1055600_novel09,MD04G1055600_novel10,MD04G1055600_novel11,MD04G1055600_novel12,MD04G1055600_novel03
Chr04	MD04G1055600	+	A3	6704695-6704727	MD04G1055600_novel05	MD04G1055600,MD04G1055600_novel04,MD04G1055600_novel03,MD04G1055600_novel02,MD04G1055600_novel06,MD04G1055600_novel07,MD04G1055600_novel08,MD04G1055600_novel09,MD04G1055600_novel10,MD04G1055600_novel11,MD04G1055600_novel12,MD04G1055600_novel05
Chr04	MD04G1055700	+	A3	6743934-6744044	MD04G1055700_novel01	MD04G1055700,MD04G1055700_novel01
Chr04	MD04G1056500	-	A3	6902481-6902476	MD04G1056500	MD04G1056500_novel01,MD04G1056500
Chr04	MD04G1057000	-	A3	6975427-6975421	MD04G1057000	MD04G1057000_novel02,MD04G1057000_novel01,MD04G1057000
Chr04	MD04G1057200	-	A3	7000395-7000367	MD04G1057200_novel05	MD04G1057200,MD04G1057200_novel04,MD04G1057200_novel01,MD04G1057200_novel03,MD04G1057200_novel02,MD04G1057200_novel05
Chr04	MD04G1057300	+	A3	7076169-7076175	MD04G1057300	MD04G1057300_novel01,MD04G1057300_novel02,MD04G1057300
Chr04	MD04G1060600	-	A3	7927733-7927623	MD04G1060600_novel01	MD04G1060600,MD04G1060600_novel01
Chr04	MD04G1060700	-	A3	7997705-7997591	MD04G1060700_novel01,MD04G1060700	MD04G1060700_novel03,MD04G1060700_novel02,MD04G1060700_novel01,MD04G1060700
Chr04	MD04G1061500	+	A3	8134815-8134830	MD04G1061500_novel04,MD04G1061500	MD04G1061500_novel03,MD04G1061500,MD04G1061500_novel04
Chr04	MD04G1062600	-	A3	8229387-8229383	MD04G1062600	MD04G1062600_novel02,MD04G1062600_novel01,MD04G1062600
Chr04	MD04G1062800	+	A3	8266675-8266679	MD04G1062800_novel01	MD04G1062800_novel02,MD04G1062800_novel04,MD04G1062800_novel03,MD04G1062800_novel05,MD04G1062800,MD04G1062800_novel06,MD04G1062800_novel08,MD04G1062800_novel09,MD04G1062800_novel10,MD04G1062800_novel01
Chr04	MD04G1062800	+	A3	8267584-8267599	MD04G1062800_novel09,MD04G1062800_novel01,MD04G1062800_novel10,MD04G1062800_novel04,MD04G1062800_novel05,MD04G1062800_novel06,MD04G1062800_novel02	MD04G1062800_novel03,MD04G1062800,MD04G1062800_novel08,MD04G1062800_novel11,MD04G1062800_novel01,MD04G1062800_novel02,MD04G1062800_novel04,MD04G1062800_novel05,MD04G1062800_novel06,MD04G1062800_novel09,MD04G1062800_novel10
Chr04	MD04G1063800	+	A3	8433581-8433586	MD04G1063800_novel01	MD04G1063800,MD04G1063800_novel02,MD04G1063800_novel01
Chr04	MD04G1063800	+	A3	8435080-8435117	MD04G1063800_novel02,MD04G1063800_novel01	MD04G1063800,MD04G1063800_novel01,MD04G1063800_novel02
Chr04	MD04G1064600	+	A3	8688857-8688869	MD04G1064600_novel06,MD04G1064600_novel29,MD04G1064600_novel50,MD04G1064600_novel13,MD04G1064600_novel08,MD04G1064600_novel11,MD04G1064600_novel10,MD04G1064600_novel15,MD04G1064600_novel14,MD04G1064600_novel30,MD04G1064600_novel33,MD04G1064600_novel18,MD04G1064600_novel35,MD04G1064600_novel19,MD04G1064600_novel37,MD04G1064600_novel36,MD04G1064600_novel32,MD04G1064600_novel34,MD04G1064600_novel48,…	MD04G1064600_novel26,MD04G1064600,MD04G1064600_novel28,MD04G1064600_novel43,MD04G1064600_novel09,MD04G1064600_novel37,MD04G1064600_novel48,MD04G1064600_novel46,MD04G1064600_novel19,MD04G1064600_novel06,MD04G1064600_novel08,MD04G1064600_novel22,MD04G1064600_novel29,MD04G1064600_novel11,MD04G1064600_novel23,MD04G1064600_novel47,MD04G1064600_novel35,MD04G1064600_novel25,MD04G1064600_novel39,MD04G106…
Chr04	MD04G1064600	+	A3	8689362-8689375	MD04G1064600_novel17,MD04G1064600_novel14,MD04G1064600_novel06,MD04G1064600_novel08,MD04G1064600_novel13,MD04G1064600_novel27	MD04G1064600,MD04G1064600_novel28,MD04G1064600_novel43,MD04G1064600_novel09,MD04G1064600_novel37,MD04G1064600_novel07,MD04G1064600_novel46,MD04G1064600_novel19,MD04G1064600_novel44,MD04G1064600_novel45,MD04G1064600_novel11,MD04G1064600_novel23,MD04G1064600_novel47,MD04G1064600_novel35,MD04G1064600_novel26,MD04G1064600_novel25,MD04G1064600_novel39,MD04G1064600_novel18,MD04G1064600_novel30,MD04G106…
Chr04	MD04G1064600	+	A3	8689362-8689578	MD04G1064600_novel22	MD04G1064600,MD04G1064600_novel28,MD04G1064600_novel43,MD04G1064600_novel09,MD04G1064600_novel37,MD04G1064600_novel07,MD04G1064600_novel46,MD04G1064600_novel19,MD04G1064600_novel44,MD04G1064600_novel45,MD04G1064600_novel11,MD04G1064600_novel23,MD04G1064600_novel47,MD04G1064600_novel35,MD04G1064600_novel26,MD04G1064600_novel25,MD04G1064600_novel39,MD04G1064600_novel18,MD04G1064600_novel30,MD04G106…
Chr04	MD04G1064600	+	A3	8689375-8689578	MD04G1064600_novel22	MD04G1064600_novel17,MD04G1064600_novel06,MD04G1064600_novel08,MD04G1064600_novel13,MD04G1064600_novel14,MD04G1064600_novel27,MD04G1064600_novel22
Chr04	MD04G1064600	+	A3	8690067-8690079	MD04G1064600_novel09	MD04G1064600_novel60,MD04G1064600_novel09
Chr04	MD04G1064600	+	A3	8690067-8690084	MD04G1064600_novel59,MD04G1064600_novel58,MD04G1064600_novel54,MD04G1064600_novel51,MD04G1064600_novel50,MD04G1064600_novel13,MD04G1064600_novel12,MD04G1064600_novel11,MD04G1064600_novel10,MD04G1064600_novel17,MD04G1064600_novel16,MD04G1064600_novel14,MD04G1064600_novel31,MD04G1064600_novel30,MD04G1064600_novel33,MD04G1064600_novel32,MD04G1064600_novel19,MD04G1064600_novel37,MD04G1064600_novel36,…	MD04G1064600_novel60,MD04G1064600,MD04G1064600_novel43,MD04G1064600_novel17,MD04G1064600_novel37,MD04G1064600_novel07,MD04G1064600_novel46,MD04G1064600_novel19,MD04G1064600_novel06,MD04G1064600_novel44,MD04G1064600_novel45,MD04G1064600_novel22,MD04G1064600_novel29,MD04G1064600_novel11,MD04G1064600_novel23,MD04G1064600_novel26,MD04G1064600_novel25,MD04G1064600_novel30,MD04G1064600_novel13,MD04G106…
Chr04	MD04G1064600	+	A3	8690079-8690084	MD04G1064600_novel59,MD04G1064600_novel58,MD04G1064600_novel54,MD04G1064600_novel51,MD04G1064600_novel50,MD04G1064600_novel13,MD04G1064600_novel12,MD04G1064600_novel11,MD04G1064600_novel10,MD04G1064600_novel17,MD04G1064600_novel16,MD04G1064600_novel14,MD04G1064600_novel31,MD04G1064600_novel30,MD04G1064600_novel33,MD04G1064600_novel32,MD04G1064600_novel19,MD04G1064600_novel37,MD04G1064600_novel36,…	MD04G1064600_novel09,MD04G1064600,MD04G1064600_novel43,MD04G1064600_novel17,MD04G1064600_novel37,MD04G1064600_novel07,MD04G1064600_novel46,MD04G1064600_novel19,MD04G1064600_novel06,MD04G1064600_novel44,MD04G1064600_novel45,MD04G1064600_novel22,MD04G1064600_novel29,MD04G1064600_novel11,MD04G1064600_novel23,MD04G1064600_novel26,MD04G1064600_novel25,MD04G1064600_novel30,MD04G1064600_novel13,MD04G106…
Chr04	MD04G1064600	+	A3	8690536-8690542	MD04G1064600_novel29,MD04G1064600_novel53,MD04G1064600_novel52,MD04G1064600_novel51,MD04G1064600_novel50,MD04G1064600_novel13,MD04G1064600_novel26,MD04G1064600_novel17,MD04G1064600_novel16,MD04G1064600_novel15,MD04G1064600_novel14,MD04G1064600_novel31,MD04G1064600_novel30,MD04G1064600_novel33,MD04G1064600_novel32,MD04G1064600_novel34,MD04G1064600_novel36,MD04G1064600_novel44,MD04G1064600_novel54,…	MD04G1064600_novel21,MD04G1064600,MD04G1064600_novel28,MD04G1064600_novel43,MD04G1064600_novel09,MD04G1064600_novel17,MD04G1064600_novel48,MD04G1064600_novel07,MD04G1064600_novel44,MD04G1064600_novel45,MD04G1064600_novel08,MD04G1064600_novel22,MD04G1064600_novel29,MD04G1064600_novel23,MD04G1064600_novel26,MD04G1064600_novel30,MD04G1064600_novel13,MD04G1064600_novel04,MD04G1064600_novel16,MD04G106…
Chr04	MD04G1064700	+	A3	8697406-8697416	MD04G1064700_novel01	MD04G1064700,MD04G1064700_novel01
Chr04	MD04G1066100	+	A3	8827101-8827126	MD04G1066100_novel02	MD04G1066100,MD04G1066100_novel02
Chr04	MD04G1066700	+	A3	8991819-8991826	MD04G1066700_novel02	MD04G1066700,MD04G1066700_novel01,MD04G1066700_novel03,MD04G1066700_novel04,MD04G1066700_novel06,MD04G1066700_novel07,MD04G1066700_novel02
Chr04	MD04G1068900	+	A3	9401046-9401071	MD04G1068900_novel04	MD04G1068900_novel05,MD04G1068900,MD04G1068900_novel06,MD04G1068900_novel02,MD04G1068900_novel03,MD04G1068900_novel07,MD04G1068900_novel08,MD04G1068900_novel01,MD04G1068900_novel09,MD04G1068900_novel10,MD04G1068900_novel12,MD04G1068900_novel11,MD04G1068900_novel13,MD04G1068900_novel14,MD04G1068900_novel15,MD04G1068900_novel16,MD04G1068900_novel04
Chr04	MD04G1069600	-	A3	9536105-9536056	MD04G1069600_novel03	MD04G1069600_novel05,MD04G1069600_novel04,MD04G1069600_novel02,MD04G1069600,MD04G1069600_novel03
Chr04	MD04G1076100	-	A3	10248092-10248089	MD04G1076100_novel01	MD04G1076100,MD04G1076100_novel01
Chr04	MD04G1076800	+	A3	10349232-10349266	MD04G1076800_novel03	MD04G1076800_novel02,MD04G1076800_novel03
Chr04	MD04G1079000	-	A3	10848273-10848268	MD04G1079000_novel01,MD04G1079000	MD04G1079000_novel02,MD04G1079000,MD04G1079000_novel01
Chr04	MD04G1081700	-	A3	11288536-11288490	MD04G1081700_novel01	MD04G1081700,MD04G1081700_novel01
Chr04	MD04G1092300	-	A3	16411027-16410983	MD04G1092300_novel08	MD04G1092300_novel05,MD04G1092300_novel03,MD04G1092300_novel06,MD04G1092300_novel08
Chr04	MD04G1092300	-	A3	16411043-16410983	MD04G1092300_novel08	MD04G1092300,MD04G1092300_novel09,MD04G1092300_novel04,MD04G1092300_novel02,MD04G1092300_novel10,MD04G1092300_novel07,MD04G1092300_novel01,MD04G1092300_novel08
Chr04	MD04G1092300	-	A3	16411043-16411027	MD04G1092300_novel03,MD04G1092300_novel05,MD04G1092300_novel06	MD04G1092300,MD04G1092300_novel09,MD04G1092300_novel04,MD04G1092300_novel02,MD04G1092300_novel10,MD04G1092300_novel07,MD04G1092300_novel01,MD04G1092300_novel05,MD04G1092300_novel03,MD04G1092300_novel06
Chr04	MD04G1092300	-	A3	16412930-16412927	MD04G1092300,MD04G1092300_novel01,MD04G1092300_novel03,MD04G1092300_novel05	MD04G1092300_novel09,MD04G1092300_novel04,MD04G1092300_novel02,MD04G1092300_novel10,MD04G1092300_novel08,MD04G1092300_novel06,MD04G1092300_novel07,MD04G1092300_novel05,MD04G1092300,MD04G1092300_novel03,MD04G1092300_novel01
Chr04	MD04G1092300	-	A3	16414347-16414342	MD04G1092300_novel10	MD04G1092300,MD04G1092300_novel10
Chr04	MD04G1092300	-	A3	16415029-16415026	MD04G1092300,MD04G1092300_novel02,MD04G1092300_novel03,MD04G1092300_novel04	MD04G1092300_novel05,MD04G1092300_novel09,MD04G1092300_novel08,MD04G1092300_novel06,MD04G1092300_novel07,MD04G1092300_novel01,MD04G1092300,MD04G1092300_novel04,MD04G1092300_novel03,MD04G1092300_novel02
Chr04	MD04G1092500	-	A3	16470694-16470691	MD04G1092500_novel01	MD04G1092500,MD04G1092500_novel01
Chr04	MD04G1092800	+	A3	16590811-16590853	MD04G1092800_novel07,MD04G1092800_novel01,MD04G1092800,MD04G1092800_novel06,MD04G1092800_novel05	MD04G1092800_novel03,MD04G1092800_novel01,MD04G1092800,MD04G1092800_novel05,MD04G1092800_novel06,MD04G1092800_novel07
Chr04	MD04G1093200	-	A3	16834297-16834252	MD04G1093200_novel04,MD04G1093200_novel02,MD04G1093200_novel03,MD04G1093200	MD04G1093200_novel01,MD04G1093200_novel04,MD04G1093200,MD04G1093200_novel02,MD04G1093200_novel03
Chr04	MD04G1095000	-	A3	17426707-17426235	MD04G1095000_novel01,MD04G1095000_novel05	MD04G1095000,MD04G1095000_novel01,MD04G1095000_novel05
Chr04	MD04G1095000	-	A3	17429134-17429103	MD04G1095000_novel03,MD04G1095000_novel01,MD04G1095000_novel06,MD04G1095000_novel04,MD04G1095000_novel05,MD04G1095000	MD04G1095000_novel02,MD04G1095000_novel01,MD04G1095000,MD04G1095000_novel05,MD04G1095000_novel06,MD04G1095000_novel03,MD04G1095000_novel04
Chr04	MD04G1095100	-	A3	17486045-17486034	MD04G1095100_novel02,MD04G1095100_novel01	MD04G1095100,MD04G1095100_novel01,MD04G1095100_novel02
Chr04	MD04G1099800	+	A3	18473624-18473637	MD04G1099800	MD04G1099800_novel02,MD04G1099800_novel01,MD04G1099800_novel03,MD04G1099800
Chr04	MD04G1100100	-	A3	18505496-18505476	MD04G1100100	MD04G1100100_novel01,MD04G1100100
Chr04	MD04G1100800	+	A3	18626743-18626807	MD04G1100800_novel25,MD04G1100800_novel20,MD04G1100800_novel07,MD04G1100800_novel04,MD04G1100800,MD04G1100800_novel18,MD04G1100800_novel15,MD04G1100800_novel05,MD04G1100800_novel17,MD04G1100800_novel10,MD04G1100800_novel13	MD04G1100800_novel09,MD04G1100800_novel02,MD04G1100800_novel11,MD04G1100800_novel03,MD04G1100800_novel06,MD04G1100800_novel14,MD04G1100800_novel01,MD04G1100800_novel12,MD04G1100800_novel21,MD04G1100800_novel22,MD04G1100800_novel23,MD04G1100800_novel24,MD04G1100800_novel07,MD04G1100800_novel10,MD04G1100800_novel15,MD04G1100800_novel05,MD04G1100800_novel13,MD04G1100800_novel18,MD04G1100800_novel20,…
Chr04	MD04G1100800	+	A3	18626807-18630263	MD04G1100800_novel16	MD04G1100800_novel17,MD04G1100800_novel16
Chr04	MD04G1100800	+	A3	18627314-18627789	MD04G1100800_novel21,MD04G1100800_novel02,MD04G1100800,MD04G1100800_novel18,MD04G1100800_novel14,MD04G1100800_novel15,MD04G1100800_novel04,MD04G1100800_novel11	MD04G1100800_novel09,MD04G1100800_novel10,MD04G1100800_novel02,MD04G1100800_novel11,MD04G1100800_novel15,MD04G1100800_novel14,MD04G1100800_novel18,MD04G1100800,MD04G1100800_novel21,MD04G1100800_novel04
Chr04	MD04G1100800	+	A3	18627314-18628394	MD04G1100800_novel20	MD04G1100800_novel10,MD04G1100800_novel20
Chr04	MD04G1100800	+	A3	18627789-18628394	MD04G1100800_novel20	MD04G1100800_novel02,MD04G1100800_novel11,MD04G1100800,MD04G1100800_novel04,MD04G1100800_novel20
Chr04	MD04G1100800	+	A3	18627789-18630263	MD04G1100800_novel05,MD04G1100800_novel01	MD04G1100800_novel02,MD04G1100800_novel04,MD04G1100800_novel05,MD04G1100800_novel01
Chr04	MD04G1100800	+	A3	18628771-18630263	MD04G1100800_novel22	MD04G1100800_novel12,MD04G1100800_novel23,MD04G1100800_novel22
Chr04	MD04G1101100	-	A3	18733056-18733051	MD04G1101100_novel01	MD04G1101100_novel02,MD04G1101100_novel03,MD04G1101100,MD04G1101100_novel05,MD04G1101100_novel04,MD04G1101100_novel06,MD04G1101100_novel01
Chr04	MD04G1103800	-	A3	19108019-19107999	MD04G1103800_novel02	MD04G1103800_novel01,MD04G1103800_novel02
Chr04	MD04G1104000	+	A3	19126698-19126719	MD04G1104000_novel02,MD04G1104000_novel01	MD04G1104000,MD04G1104000_novel01,MD04G1104000_novel02
Chr04	MD04G1104300	+	A3	19167719-19167722	MD04G1104300_novel03,MD04G1104300	MD04G1104300_novel01,MD04G1104300_novel02,MD04G1104300,MD04G1104300_novel03
Chr04	MD04G1104600	-	A3	19210900-19210870	MD04G1104600_novel01	MD04G1104600,MD04G1104600_novel02,MD04G1104600_novel04,MD04G1104600_novel03,MD04G1104600_novel01
Chr04	MD04G1104600	-	A3	19211687-19211593	MD04G1104600_novel02,MD04G1104600_novel04	MD04G1104600,MD04G1104600_novel03,MD04G1104600_novel01,MD04G1104600_novel02,MD04G1104600_novel04
Chr04	MD04G1104700	-	A3	19219853-19219784	MD04G1104700_novel01,MD04G1104700_novel02	MD04G1104700,MD04G1104700_novel02,MD04G1104700_novel01
Chr04	MD04G1105100	+	A3	19273376-19273407	MD04G1105100_novel01	MD04G1105100,MD04G1105100_novel01
Chr04	MD04G1111300	+	A3	19606741-19606752	MD04G1111300_novel02	MD04G1111300_novel01,MD04G1111300,MD04G1111300_novel02
Chr04	MD04G1111300	+	A3	19607500-19607520	MD04G1111300_novel02,MD04G1111300	MD04G1111300_novel01,MD04G1111300,MD04G1111300_novel02
Chr04	MD04G1112600	-	A3	19822499-19822487	MD04G1112600_novel16	MD04G1112600,MD04G1112600_novel17,MD04G1112600_novel18,MD04G1112600_novel16
Chr04	MD04G1112600	-	A3	19822797-19822499	MD04G1112600_novel11,MD04G1112600_novel03	MD04G1112600_novel10,MD04G1112600_novel07,MD04G1112600_novel02,MD04G1112600_novel06,MD04G1112600_novel12,MD04G1112600_novel13,MD04G1112600_novel19,MD04G1112600_novel05,MD04G1112600_novel01,MD04G1112600_novel04,MD04G1112600_novel09,MD04G1112600_novel15,MD04G1112600_novel14,MD04G1112600_novel11,MD04G1112600_novel03
Chr04	MD04G1112600	-	A3	19823462-19823454	MD04G1112600_novel04	MD04G1112600_novel02,MD04G1112600,MD04G1112600_novel17,MD04G1112600_novel03,MD04G1112600_novel16,MD04G1112600_novel04
Chr04	MD04G1112600	-	A3	19823495-19823454	MD04G1112600_novel04	MD04G1112600_novel05,MD04G1112600_novel04
Chr04	MD04G1112600	-	A3	19823495-19823462	MD04G1112600,MD04G1112600_novel02,MD04G1112600_novel03,MD04G1112600_novel17,MD04G1112600_novel16	MD04G1112600_novel05,MD04G1112600_novel02,MD04G1112600,MD04G1112600_novel17,MD04G1112600_novel03,MD04G1112600_novel16
Chr04	MD04G1112600	-	A3	19823581-19823280	MD04G1112600_novel09	MD04G1112600_novel11,MD04G1112600_novel12,MD04G1112600_novel09
Chr04	MD04G1112600	-	A3	19823581-19823454	MD04G1112600_novel04	MD04G1112600_novel11,MD04G1112600_novel12,MD04G1112600_novel01,MD04G1112600_novel18,MD04G1112600_novel04
Chr04	MD04G1112600	-	A3	19823581-19823462	MD04G1112600,MD04G1112600_novel02,MD04G1112600_novel03,MD04G1112600_novel17,MD04G1112600_novel16	MD04G1112600_novel11,MD04G1112600_novel12,MD04G1112600_novel01,MD04G1112600_novel18,MD04G1112600_novel02,MD04G1112600,MD04G1112600_novel17,MD04G1112600_novel03,MD04G1112600_novel16
Chr04	MD04G1112600	-	A3	19823581-19823495	MD04G1112600_novel05	MD04G1112600_novel11,MD04G1112600_novel12,MD04G1112600_novel01,MD04G1112600_novel18,MD04G1112600_novel05
Chr04	MD04G1112600	-	A3	19823601-19823581	MD04G1112600_novel18,MD04G1112600_novel11,MD04G1112600_novel13,MD04G1112600_novel12,MD04G1112600_novel01	MD04G1112600_novel14,MD04G1112600_novel11,MD04G1112600_novel12,MD04G1112600_novel13,MD04G1112600_novel01,MD04G1112600_novel18
Chr04	MD04G1113100	-	A3	19847098-19847095	MD04G1113100	MD04G1113100_novel05,MD04G1113100_novel04,MD04G1113100_novel02,MD04G1113100
Chr04	MD04G1113100	-	A3	19849811-19849449	MD04G1113100_novel02,MD04G1113100	MD04G1113100_novel04,MD04G1113100_novel03,MD04G1113100,MD04G1113100_novel02
Chr04	MD04G1113200	-	A3	19886370-19886351	MD04G1113200_novel02,MD04G1113200_novel05	MD04G1113200_novel01,MD04G1113200_novel05,MD04G1113200_novel02
Chr04	MD04G1117500	-	A3	20268569-20268566	MD04G1117500	MD04G1117500_novel01,MD04G1117500_novel02,MD04G1117500
Chr04	MD04G1120300	+	A3	20655815-20655827	MD04G1120300_novel02,MD04G1120300_novel01	MD04G1120300,MD04G1120300_novel01,MD04G1120300_novel02
Chr04	MD04G1121900	-	A3	20771252-20770882	MD04G1121900_novel02,MD04G1121900,MD04G1121900_novel05,MD04G1121900_novel04	MD04G1121900_novel03,MD04G1121900,MD04G1121900_novel02,MD04G1121900_novel05,MD04G1121900_novel04
Chr04	MD04G1122100	-	A3	20784849-20784732	MD04G1122100_novel01	MD04G1122100_novel07,MD04G1122100,MD04G1122100_novel06,MD04G1122100_novel04,MD04G1122100_novel01
Chr04	MD04G1122100	-	A3	20784849-20784732	MD04G1122100_novel03	MD04G1122100_novel02,MD04G1122100_novel03
Chr04	MD04G1122600	+	A3	20822598-20823507	MD04G1122600	MD04G1122600_novel01,MD04G1122600
Chr04	MD04G1123700	-	A3	20946416-20946311	MD04G1123700,MD04G1123700_novel03,MD04G1123700_novel01	MD04G1123700_novel02,MD04G1123700_novel03,MD04G1123700,MD04G1123700_novel01
Chr04	MD04G1123700	-	A3	20953147-20953127	MD04G1123700_novel01	MD04G1123700_novel03,MD04G1123700_novel01
Chr04	MD04G1125700	-	A3	21218678-21218564	MD04G1125700_novel01	MD04G1125700,MD04G1125700_novel01
Chr04	MD04G1129200	+	A3	21503869-21503872	MD04G1129200	MD04G1129200_novel01,MD04G1129200
Chr04	MD04G1129300	-	A3	21517579-21517569	MD04G1129300_novel04	MD04G1129300,MD04G1129300_novel02,MD04G1129300_novel03,MD04G1129300_novel05,MD04G1129300_novel01,MD04G1129300_novel04
Chr04	MD04G1129300	-	A3	21518954-21517967	MD04G1129300_novel02	MD04G1129300,MD04G1129300_novel03,MD04G1129300_novel04,MD04G1129300_novel02
Chr04	MD04G1129900	-	A3	21654078-21654065	MD04G1129900,MD04G1129900_novel03,MD04G1129900_novel02,MD04G1129900_novel01,MD04G1129900_novel07,MD04G1129900_novel06,MD04G1129900_novel05,MD04G1129900_novel09	MD04G1129900_novel08,MD04G1129900,MD04G1129900_novel06,MD04G1129900_novel09,MD04G1129900_novel05,MD04G1129900_novel03,MD04G1129900_novel07,MD04G1129900_novel01,MD04G1129900_novel02
Chr04	MD04G1129900	-	A3	21656134-21656076	MD04G1129900_novel01	MD04G1129900,MD04G1129900_novel06,MD04G1129900_novel05,MD04G1129900_novel03,MD04G1129900_novel07,MD04G1129900_novel02,MD04G1129900_novel04,MD04G1129900_novel01
Chr04	MD04G1130300	+	A3	21684779-21684782	MD04G1130300	MD04G1130300_novel01,MD04G1130300
Chr04	MD04G1135600	-	A3	22245916-22245896	MD04G1135600	MD04G1135600_novel02,MD04G1135600_novel01,MD04G1135600_novel06,MD04G1135600_novel03,MD04G1135600_novel07,MD04G1135600_novel05,MD04G1135600
Chr04	MD04G1135600	-	A3	22247200-22247195	MD04G1135600_novel07	MD04G1135600,MD04G1135600_novel02,MD04G1135600_novel01,MD04G1135600_novel06,MD04G1135600_novel03,MD04G1135600_novel05,MD04G1135600_novel04,MD04G1135600_novel07
Chr04	MD04G1135600	-	A3	22248470-22248463	MD04G1135600_novel01,MD04G1135600_novel02,MD04G1135600_novel04,MD04G1135600_novel06,MD04G1135600	MD04G1135600_novel03,MD04G1135600_novel05,MD04G1135600,MD04G1135600_novel02,MD04G1135600_novel01,MD04G1135600_novel06,MD04G1135600_novel04
Chr04	MD04G1136000	-	A3	22309942-22309864	MD04G1136000_novel04,MD04G1136000_novel01,MD04G1136000_novel03,MD04G1136000	MD04G1136000_novel02,MD04G1136000,MD04G1136000_novel01,MD04G1136000_novel04,MD04G1136000_novel03
Chr04	MD04G1142000	+	A3	23095622-23095633	MD04G1142000	MD04G1142000_novel01,MD04G1142000_novel02,MD04G1142000
Chr04	MD04G1146100	-	A3	23467420-23467350	MD04G1146100	MD04G1146100_novel01,MD04G1146100
Chr04	MD04G1146600	+	A3	23497702-23497807	MD04G1146600_novel01	MD04G1146600,MD04G1146600_novel03,MD04G1146600_novel01
Chr04	MD04G1146700	+	A3	23508329-23508337	MD04G1146700_novel02	MD04G1146700,MD04G1146700_novel01,MD04G1146700_novel03,MD04G1146700_novel04,MD04G1146700_novel05,MD04G1146700_novel02
Chr04	MD04G1146700	+	A3	23510988-23511003	MD04G1146700_novel02,MD04G1146700_novel03,MD04G1146700_novel01,MD04G1146700_novel06,MD04G1146700_novel04,MD04G1146700_novel05	MD04G1146700,MD04G1146700_novel01,MD04G1146700_novel02,MD04G1146700_novel03,MD04G1146700_novel04,MD04G1146700_novel05,MD04G1146700_novel06
Chr04	MD04G1155600	-	A3	24322181-24322178	MD04G1155600_novel04,MD04G1155600_novel01,MD04G1155600_novel16,MD04G1155600_novel09,MD04G1155600_novel07,MD04G1155600_novel11,MD04G1155600_novel02	MD04G1155600_novel10,MD04G1155600_novel06,MD04G1155600_novel14,MD04G1155600_novel12,MD04G1155600_novel05,MD04G1155600,MD04G1155600_novel03,MD04G1155600_novel15,MD04G1155600_novel01,MD04G1155600_novel11,MD04G1155600_novel07,MD04G1155600_novel16,MD04G1155600_novel09,MD04G1155600_novel04,MD04G1155600_novel02
Chr04	MD04G1155600	-	A3	24322345-24322330	MD04G1155600_novel08	MD04G1155600_novel01,MD04G1155600_novel10,MD04G1155600_novel06,MD04G1155600_novel14,MD04G1155600_novel12,MD04G1155600_novel11,MD04G1155600_novel05,MD04G1155600_novel07,MD04G1155600,MD04G1155600_novel04,MD04G1155600_novel03,MD04G1155600_novel15,MD04G1155600_novel02,MD04G1155600_novel13,MD04G1155600_novel08
Chr04	MD04G1155600	-	A3	24324713-24324704	MD04G1155600_novel07,MD04G1155600_novel06,MD04G1155600_novel10,MD04G1155600_novel12,MD04G1155600,MD04G1155600_novel09,MD04G1155600_novel08,MD04G1155600_novel11,MD04G1155600_novel03,MD04G1155600_novel02	MD04G1155600_novel01,MD04G1155600_novel05,MD04G1155600_novel04,MD04G1155600_novel10,MD04G1155600_novel06,MD04G1155600_novel12,MD04G1155600_novel11,MD04G1155600_novel07,MD04G1155600,MD04G1155600_novel09,MD04G1155600_novel03,MD04G1155600_novel02,MD04G1155600_novel08
Chr04	MD04G1155700	+	A3	24358384-24358394	MD04G1155700_novel01	MD04G1155700,MD04G1155700_novel06,MD04G1155700_novel02,MD04G1155700_novel07,MD04G1155700_novel03,MD04G1155700_novel08,MD04G1155700_novel04,MD04G1155700_novel09,MD04G1155700_novel10,MD04G1155700_novel11,MD04G1155700_novel01
Chr04	MD04G1159300	-	A3	24748612-24748598	MD04G1159300_novel03	MD04G1159300_novel01,MD04G1159300,MD04G1159300_novel04,MD04G1159300_novel03
Chr04	MD04G1159300	-	A3	24748620-24748598	MD04G1159300_novel03	MD04G1159300_novel05,MD04G1159300_novel02,MD04G1159300_novel06,MD04G1159300_novel03
Chr04	MD04G1159300	-	A3	24748620-24748612	MD04G1159300_novel01,MD04G1159300_novel04,MD04G1159300	MD04G1159300_novel05,MD04G1159300_novel02,MD04G1159300_novel06,MD04G1159300_novel01,MD04G1159300,MD04G1159300_novel04
Chr04	MD04G1159300	-	A3	24750876-24750850	MD04G1159300_novel04	MD04G1159300_novel01,MD04G1159300,MD04G1159300_novel05,MD04G1159300_novel02,MD04G1159300_novel06,MD04G1159300_novel03,MD04G1159300_novel04
Chr04	MD04G1161400	-	A3	25213140-25213137	MD04G1161400	MD04G1161400_novel02,MD04G1161400_novel01,MD04G1161400
Chr04	MD04G1163500	-	A3	25485085-25485031	MD04G1163500_novel01,MD04G1163500_novel03,MD04G1163500_novel02	MD04G1163500,MD04G1163500_novel01,MD04G1163500_novel03,MD04G1163500_novel02
Chr04	MD04G1165300	+	A3	25590993-25591019	MD04G1165300_novel01	MD04G1165300,MD04G1165300_novel01
Chr04	MD04G1166800	+	A3	25704075-25704317	MD04G1166800_novel01,MD04G1166800,MD04G1166800_novel04	MD04G1166800_novel05,MD04G1166800_novel01,MD04G1166800_novel04,MD04G1166800
Chr04	MD04G1166900	-	A3	25709443-25709437	MD04G1166900	MD04G1166900_novel01,MD04G1166900
Chr04	MD04G1168800	-	A3	25925879-25925860	MD04G1168800_novel01	MD04G1168800,MD04G1168800_novel02,MD04G1168800_novel01
Chr04	MD04G1171600	+	A3	26321103-26321194	MD04G1171600_novel02	MD04G1171600_novel01,MD04G1171600_novel03,MD04G1171600,MD04G1171600_novel04,MD04G1171600_novel02
Chr04	MD04G1172800	-	A3	26433809-26433388	MD04G1172800_novel02	MD04G1172800_novel01,MD04G1172800_novel02
Chr04	MD04G1174500	-	A3	26594619-26594453	MD04G1174500,MD04G1174500_novel05,MD04G1174500_novel04,MD04G1174500_novel07,MD04G1174500_novel06,MD04G1174500_novel03,MD04G1174500_novel02	MD04G1174500_novel09,MD04G1174500,MD04G1174500_novel02,MD04G1174500_novel04,MD04G1174500_novel03,MD04G1174500_novel05,MD04G1174500_novel07,MD04G1174500_novel06
Chr04	MD04G1174500	-	A3	26595645-26595561	MD04G1174500_novel02	MD04G1174500_novel03,MD04G1174500_novel02
Chr04	MD04G1174500	-	A3	26595669-26595561	MD04G1174500_novel02	MD04G1174500,MD04G1174500_novel04,MD04G1174500_novel05,MD04G1174500_novel07,MD04G1174500_novel09,MD04G1174500_novel06,MD04G1174500_novel01,MD04G1174500_novel02
Chr04	MD04G1174500	-	A3	26595669-26595645	MD04G1174500_novel03	MD04G1174500,MD04G1174500_novel04,MD04G1174500_novel05,MD04G1174500_novel07,MD04G1174500_novel09,MD04G1174500_novel06,MD04G1174500_novel01,MD04G1174500_novel03
Chr04	MD04G1174500	-	A3	26597882-26597838	MD04G1174500_novel05	MD04G1174500,MD04G1174500_novel02,MD04G1174500_novel04,MD04G1174500_novel03,MD04G1174500_novel07,MD04G1174500_novel06,MD04G1174500_novel01,MD04G1174500_novel05
Chr04	MD04G1175100	-	A3	26628738-26628736	MD04G1175100_novel04	MD04G1175100,MD04G1175100_novel02,MD04G1175100_novel01,MD04G1175100_novel03,MD04G1175100_novel04
Chr04	MD04G1177500	+	A3	26877792-26877839	MD04G1177500_novel01	MD04G1177500,MD04G1177500_novel01
Chr04	MD04G1179600	+	A3	27072416-27072421	MD04G1179600_novel01,MD04G1179600_novel02	MD04G1179600,MD04G1179600_novel03,MD04G1179600_novel04,MD04G1179600_novel01,MD04G1179600_novel02
Chr04	MD04G1180400	+	A3	27126332-27126357	MD04G1180400_novel03,MD04G1180400	MD04G1180400_novel01,MD04G1180400,MD04G1180400_novel03
Chr04	MD04G1181400	-	A3	27215079-27214845	MD04G1181400	MD04G1181400_novel01,MD04G1181400
Chr04	MD04G1181600	-	A3	27262698-27262689	MD04G1181600	MD04G1181600_novel01,MD04G1181600
Chr04	MD04G1181800	-	A3	27275604-27275556	MD04G1181800	MD04G1181800_novel01,MD04G1181800
Chr04	MD04G1181800	-	A3	27276538-27276495	MD04G1181800_novel01	MD04G1181800,MD04G1181800_novel01
Chr04	MD04G1183000	-	A3	27405804-27405756	MD04G1183000	MD04G1183000_novel01,MD04G1183000_novel08,MD04G1183000_novel02,MD04G1183000_novel06,MD04G1183000_novel03,MD04G1183000_novel05,MD04G1183000
Chr04	MD04G1183000	-	A3	27407087-27406927	MD04G1183000	MD04G1183000_novel01,MD04G1183000_novel02,MD04G1183000
Chr04	MD04G1183100	-	A3	27445136-27445119	MD04G1183100	MD04G1183100_novel01,MD04G1183100
Chr04	MD04G1185000	+	A3	27625848-27625946	MD04G1185000	MD04G1185000_novel01,MD04G1185000
Chr04	MD04G1185100	-	A3	27632305-27631978	MD04G1185100_novel01,MD04G1185100_novel03	MD04G1185100,MD04G1185100_novel04,MD04G1185100_novel02,MD04G1185100_novel03,MD04G1185100_novel01
Chr04	MD04G1185700	+	A3	27671249-27671253	MD04G1185700	MD04G1185700_novel01,MD04G1185700
Chr04	MD04G1187900	-	A3	27834921-27834881	MD04G1187900_novel02	MD04G1187900,MD04G1187900_novel01,MD04G1187900_novel04,MD04G1187900_novel02
Chr04	MD04G1188700	+	A3	27932426-27932453	MD04G1188700_novel01	MD04G1188700,MD04G1188700_novel01
Chr04	MD04G1188900	+	A3	27942824-27942830	MD04G1188900_novel03	MD04G1188900_novel02,MD04G1188900_novel01,MD04G1188900,MD04G1188900_novel04,MD04G1188900_novel03
Chr04	MD04G1188900	+	A3	27946600-27946625	MD04G1188900_novel02	MD04G1188900_novel04,MD04G1188900_novel02
Chr04	MD04G1189400	+	A3	27978248-27978251	MD04G1189400,MD04G1189400_novel08	MD04G1189400_novel06,MD04G1189400_novel07,MD04G1189400_novel04,MD04G1189400_novel09,MD04G1189400_novel05,MD04G1189400,MD04G1189400_novel08
Chr04	MD04G1189400	+	A3	27978536-27978616	MD04G1189400_novel04	MD04G1189400,MD04G1189400_novel06,MD04G1189400_novel02,MD04G1189400_novel07,MD04G1189400_novel03,MD04G1189400_novel08,MD04G1189400_novel01,MD04G1189400_novel09,MD04G1189400_novel05,MD04G1189400_novel10,MD04G1189400_novel11,MD04G1189400_novel04
Chr04	MD04G1189400	+	A3	27978928-27979051	MD04G1189400_novel05	MD04G1189400,MD04G1189400_novel06,MD04G1189400_novel02,MD04G1189400_novel07,MD04G1189400_novel03,MD04G1189400_novel08,MD04G1189400_novel04,MD04G1189400_novel01,MD04G1189400_novel09,MD04G1189400_novel10,MD04G1189400_novel11,MD04G1189400_novel05
Chr04	MD04G1189400	+	A3	27980124-27980129	MD04G1189400_novel09	MD04G1189400,MD04G1189400_novel06,MD04G1189400_novel02,MD04G1189400_novel07,MD04G1189400_novel03,MD04G1189400_novel08,MD04G1189400_novel04,MD04G1189400_novel01,MD04G1189400_novel05,MD04G1189400_novel10,MD04G1189400_novel11,MD04G1189400_novel09
Chr04	MD04G1189400	+	A3	27980498-27980523	MD04G1189400_novel02	MD04G1189400,MD04G1189400_novel06,MD04G1189400_novel03,MD04G1189400_novel08,MD04G1189400_novel04,MD04G1189400_novel01,MD04G1189400_novel05,MD04G1189400_novel10,MD04G1189400_novel11,MD04G1189400_novel02
Chr04	MD04G1189800	+	A3	28002623-28002644	MD04G1189800_novel04,MD04G1189800_novel05,MD04G1189800_novel01,MD04G1189800_novel02,MD04G1189800	MD04G1189800_novel03,MD04G1189800,MD04G1189800_novel01,MD04G1189800_novel04,MD04G1189800_novel02,MD04G1189800_novel05
Chr04	MD04G1189800	+	A3	28003544-28003558	MD04G1189800_novel01,MD04G1189800	MD04G1189800_novel04,MD04G1189800_novel02,MD04G1189800_novel03,MD04G1189800_novel05,MD04G1189800_novel06,MD04G1189800,MD04G1189800_novel01
Chr04	MD04G1191200	-	A3	28082824-28082815	MD04G1191200_novel01	MD04G1191200_novel03,MD04G1191200_novel01
Chr04	MD04G1191200	-	A3	28082831-28082815	MD04G1191200_novel01	MD04G1191200_novel02,MD04G1191200,MD04G1191200_novel01
Chr04	MD04G1191200	-	A3	28082831-28082824	MD04G1191200_novel03	MD04G1191200_novel02,MD04G1191200,MD04G1191200_novel03
Chr04	MD04G1191200	-	A3	28083015-28083012	MD04G1191200	MD04G1191200_novel01,MD04G1191200
Chr04	MD04G1194100	+	A3	28357136-28357149	MD04G1194100_novel01	MD04G1194100,MD04G1194100_novel03,MD04G1194100_novel04,MD04G1194100_novel05,MD04G1194100_novel06,MD04G1194100_novel07,MD04G1194100_novel01
Chr04	MD04G1194300	-	A3	28367865-28367735	MD04G1194300_novel02	MD04G1194300_novel04,MD04G1194300_novel01,MD04G1194300,MD04G1194300_novel02
Chr04	MD04G1195700	-	A3	28430280-28430098	MD04G1195700_novel01	MD04G1195700,MD04G1195700_novel01
Chr04	MD04G1196000	+	A3	28448120-28448573	MD04G1196000_novel02	MD04G1196000_novel01,MD04G1196000_novel03,MD04G1196000_novel04,MD04G1196000_novel05,MD04G1196000_novel02
Chr04	MD04G1196500	+	A3	28488284-28488292	MD04G1196500_novel04	MD04G1196500_novel01,MD04G1196500_novel02,MD04G1196500,MD04G1196500_novel03,MD04G1196500_novel04
Chr04	MD04G1196500	+	A3	28488998-28489026	MD04G1196500_novel01,MD04G1196500,MD04G1196500_novel02,MD04G1196500_novel03	MD04G1196500_novel04,MD04G1196500_novel01,MD04G1196500_novel02,MD04G1196500,MD04G1196500_novel03
Chr04	MD04G1196900	-	A3	28514853-28514574	MD04G1196900,MD04G1196900_novel03	MD04G1196900_novel02,MD04G1196900,MD04G1196900_novel03
Chr04	MD04G1197000	-	A3	28517073-28517070	MD04G1197000_novel17	MD04G1197000,MD04G1197000_novel06,MD04G1197000_novel09,MD04G1197000_novel11,MD04G1197000_novel18,MD04G1197000_novel04,MD04G1197000_novel05,MD04G1197000_novel20,MD04G1197000_novel01,MD04G1197000_novel03,MD04G1197000_novel19,MD04G1197000_novel10,MD04G1197000_novel08,MD04G1197000_novel02,MD04G1197000_novel16,MD04G1197000_novel13,MD04G1197000_novel15,MD04G1197000_novel12,MD04G1197000_novel07,MD04G119…
Chr04	MD04G1197000	-	A3	28521630-28521594	MD04G1197000_novel06,MD04G1197000_novel12,MD04G1197000_novel01,MD04G1197000_novel04	MD04G1197000,MD04G1197000_novel09,MD04G1197000_novel11,MD04G1197000_novel05,MD04G1197000_novel03,MD04G1197000_novel10,MD04G1197000_novel02,MD04G1197000_novel13,MD04G1197000_novel07,MD04G1197000_novel14,MD04G1197000_novel06,MD04G1197000_novel04,MD04G1197000_novel01,MD04G1197000_novel12
Chr04	MD04G1197000	-	A3	28523934-28523923	MD04G1197000_novel03,MD04G1197000_novel06	MD04G1197000,MD04G1197000_novel04,MD04G1197000_novel05,MD04G1197000_novel01,MD04G1197000_novel08,MD04G1197000_novel07,MD04G1197000_novel06,MD04G1197000_novel03
Chr04	MD04G1197500	-	A3	28550982-28550945	MD04G1197500_novel01	MD04G1197500,MD04G1197500_novel02,MD04G1197500_novel01
Chr04	MD04G1197500	-	A3	28551475-28551444	MD04G1197500_novel01	MD04G1197500,MD04G1197500_novel02,MD04G1197500_novel01
Chr04	MD04G1198300	-	A3	28585487-28585448	MD04G1198300_novel02	MD04G1198300,MD04G1198300_novel02
Chr04	MD04G1198500	-	A3	28594694-28594086	MD04G1198500	MD04G1198500_novel01,MD04G1198500
Chr04	MD04G1200000	-	A3	28682766-28682708	MD04G1200000_novel01	MD04G1200000,MD04G1200000_novel03,MD04G1200000_novel01
Chr04	MD04G1200000	-	A3	28684277-28684246	MD04G1200000_novel02	MD04G1200000,MD04G1200000_novel01,MD04G1200000_novel02
Chr04	MD04G1200800	-	A3	28718849-28718843	MD04G1200800	MD04G1200800_novel03,MD04G1200800
Chr04	MD04G1200800	-	A3	28718886-28718843	MD04G1200800_novel02	MD04G1200800_novel04,MD04G1200800_novel02
Chr04	MD04G1200800	-	A3	28720275-28720264	MD04G1200800_novel02,MD04G1200800_novel01,MD04G1200800_novel04,MD04G1200800	MD04G1200800_novel03,MD04G1200800_novel04,MD04G1200800_novel01,MD04G1200800,MD04G1200800_novel02
Chr04	MD04G1203700	-	A3	28987569-28987566	MD04G1203700_novel01	MD04G1203700_novel02,MD04G1203700,MD04G1203700_novel03,MD04G1203700_novel04,MD04G1203700_novel01
Chr04	MD04G1203800	-	A3	28993353-28992876	MD04G1203800_novel01	MD04G1203800_novel02,MD04G1203800_novel01
Chr04	MD04G1203800	-	A3	28993369-28993353	MD04G1203800_novel02	MD04G1203800,MD04G1203800_novel02
Chr04	MD04G1205000	+	A3	29112682-29112686	MD04G1205000	MD04G1205000_novel02,MD04G1205000
Chr04	MD04G1205000	+	A3	29112682-29112689	MD04G1205000_novel01,MD04G1205000_novel03	MD04G1205000_novel02,MD04G1205000_novel01,MD04G1205000_novel03
Chr04	MD04G1205000	+	A3	29112686-29112689	MD04G1205000_novel01,MD04G1205000_novel03	MD04G1205000,MD04G1205000_novel01,MD04G1205000_novel03
Chr04	MD04G1205300	+	A3	29156546-29156558	MD04G1205300_novel01	MD04G1205300,MD04G1205300_novel01
Chr04	MD04G1205300	+	A3	29158959-29159002	MD04G1205300	MD04G1205300_novel01,MD04G1205300_novel02,MD04G1205300
Chr04	MD04G1205700	-	A3	29177242-29177217	MD04G1205700_novel07	MD04G1205700,MD04G1205700_novel03,MD04G1205700_novel01,MD04G1205700_novel04,MD04G1205700_novel11,MD04G1205700_novel08,MD04G1205700_novel05,MD04G1205700_novel09,MD04G1205700_novel02,MD04G1205700_novel12,MD04G1205700_novel06,MD04G1205700_novel10,MD04G1205700_novel07
Chr04	MD04G1205700	-	A3	29180426-29180386	MD04G1205700_novel11,MD04G1205700_novel06,MD04G1205700_novel01,MD04G1205700_novel10	MD04G1205700_novel02,MD04G1205700_novel01,MD04G1205700_novel11,MD04G1205700_novel06,MD04G1205700_novel10
Chr04	MD04G1206500	-	A3	29224547-29224536	MD04G1206500_novel03	MD04G1206500,MD04G1206500_novel04,MD04G1206500_novel01,MD04G1206500_novel02,MD04G1206500_novel03
Chr04	MD04G1206500	-	A3	29225173-29225169	MD04G1206500_novel03	MD04G1206500,MD04G1206500_novel04,MD04G1206500_novel01,MD04G1206500_novel03
Chr04	MD04G1208300	+	A3	29329064-29329067	MD04G1208300_novel01,MD04G1208300_novel02	MD04G1208300_novel03,MD04G1208300_novel01,MD04G1208300_novel02
Chr04	MD04G1208300	+	A3	29329329-29329335	MD04G1208300_novel03,MD04G1208300_novel04	MD04G1208300_novel01,MD04G1208300_novel05,MD04G1208300_novel02,MD04G1208300,MD04G1208300_novel03,MD04G1208300_novel04
Chr04	MD04G1209100	-	A3	29442529-29442524	MD04G1209100_novel01	MD04G1209100,MD04G1209100_novel01
Chr04	MD04G1211400	+	A3	29577161-29577298	MD04G1211400_novel02	MD04G1211400_novel01,MD04G1211400_novel02
Chr04	MD04G1212000	+	A3	29648686-29648756	MD04G1212000_novel01	MD04G1212000_novel06,MD04G1212000_novel01
Chr04	MD04G1213400	-	A3	29712417-29712339	MD04G1213400_novel02,MD04G1213400_novel01	MD04G1213400,MD04G1213400_novel04,MD04G1213400_novel01,MD04G1213400_novel02
Chr04	MD04G1213800	-	A3	29730481-29730474	MD04G1213800_novel11	MD04G1213800_novel07,MD04G1213800_novel02,MD04G1213800_novel11
Chr04	MD04G1215200	+	A3	29828896-29828916	MD04G1215200_novel02	MD04G1215200,MD04G1215200_novel01,MD04G1215200_novel02
Chr04	MD04G1215200	+	A3	29830385-29830399	MD04G1215200_novel01	MD04G1215200,MD04G1215200_novel02,MD04G1215200_novel03,MD04G1215200_novel04,MD04G1215200_novel01
Chr04	MD04G1215200	+	A3	29831063-29831067	MD04G1215200_novel01	MD04G1215200,MD04G1215200_novel02,MD04G1215200_novel03,MD04G1215200_novel04,MD04G1215200_novel01
Chr04	MD04G1216500	-	A3	29909469-29909453	MD04G1216500_novel03,MD04G1216500_novel04,MD04G1216500_novel05,MD04G1216500	MD04G1216500_novel01,MD04G1216500,MD04G1216500_novel04,MD04G1216500_novel05,MD04G1216500_novel03
Chr04	MD04G1216700	-	A3	29929973-29929929	MD04G1216700_novel01	MD04G1216700,MD04G1216700_novel01
Chr04	MD04G1217000	-	A3	29970029-29970014	MD04G1217000_novel07,MD04G1217000_novel04,MD04G1217000_novel05,MD04G1217000_novel03,MD04G1217000_novel01,MD04G1217000,MD04G1217000_novel08	MD04G1217000_novel02,MD04G1217000_novel05,MD04G1217000,MD04G1217000_novel01,MD04G1217000_novel08,MD04G1217000_novel03,MD04G1217000_novel04,MD04G1217000_novel07
Chr04	MD04G1217700	-	A3	30034509-30034477	MD04G1217700_novel05	MD04G1217700_novel07,MD04G1217700,MD04G1217700_novel08,MD04G1217700_novel02,MD04G1217700_novel10,MD04G1217700_novel03,MD04G1217700_novel06,MD04G1217700_novel09,MD04G1217700_novel04,MD04G1217700_novel05
Chr04	MD04G1218000	-	A3	30051568-30051565	MD04G1218000	MD04G1218000_novel03,MD04G1218000
Chr04	MD04G1219200	+	A3	30112626-30112681	MD04G1219200,MD04G1219200_novel02,MD04G1219200_novel03,MD04G1219200_novel04,MD04G1219200_novel05	MD04G1219200_novel01,MD04G1219200,MD04G1219200_novel05,MD04G1219200_novel02,MD04G1219200_novel03,MD04G1219200_novel04
Chr04	MD04G1219200	+	A3	30114036-30114068	MD04G1219200_novel04	MD04G1219200_novel01,MD04G1219200,MD04G1219200_novel05,MD04G1219200_novel02,MD04G1219200_novel03,MD04G1219200_novel06,MD04G1219200_novel04
Chr04	MD04G1220500	-	A3	30154153-30154127	MD04G1220500_novel06,MD04G1220500_novel01,MD04G1220500_novel08,MD04G1220500	MD04G1220500_novel02,MD04G1220500,MD04G1220500_novel06,MD04G1220500_novel08,MD04G1220500_novel01
Chr04	MD04G1221700	+	A3	30287738-30287762	MD04G1221700	MD04G1221700_novel01,MD04G1221700_novel02,MD04G1221700
Chr04	MD04G1224200	-	A3	30434880-30434838	MD04G1224200_novel01	MD04G1224200,MD04G1224200_novel01
Chr04	MD04G1225500	+	A3	30548796-30548852	MD04G1225500_novel03	MD04G1225500_novel01,MD04G1225500_novel03
Chr04	MD04G1227600	+	A3	30706235-30706239	MD04G1227600_novel03,MD04G1227600_novel01,MD04G1227600	MD04G1227600_novel02,MD04G1227600_novel01,MD04G1227600,MD04G1227600_novel03
Chr04	MD04G1229500	+	A3	30976519-30976814	MD04G1229500_novel04,MD04G1229500_novel02,MD04G1229500	MD04G1229500_novel03,MD04G1229500,MD04G1229500_novel02,MD04G1229500_novel04
Chr04	MD04G1229800	-	A3	31003595-31003442	MD04G1229800_novel02	MD04G1229800,MD04G1229800_novel01,MD04G1229800_novel02
Chr04	MD04G1229900	+	A3	31015570-31015583	MD04G1229900_novel02,MD04G1229900	MD04G1229900_novel01,MD04G1229900,MD04G1229900_novel02
Chr04	MD04G1231000	-	A3	31075818-31075809	MD04G1231000_novel01	MD04G1231000_novel03,MD04G1231000,MD04G1231000_novel02,MD04G1231000_novel05,MD04G1231000_novel04,MD04G1231000_novel01
Chr04	MD04G1231200	-	A3	31084881-31084877	MD04G1231200	MD04G1231200_novel01,MD04G1231200_novel02,MD04G1231200
Chr04	MD04G1233200	+	A3	31221166-31221172	MD04G1233200	MD04G1233200_novel01,MD04G1233200
Chr04	MD04G1235300	+	A3	31434410-31434518	MD04G1235300,MD04G1235300_novel02,MD04G1235300_novel03,MD04G1235300_novel04,MD04G1235300_novel09,MD04G1235300_novel08,MD04G1235300_novel06,MD04G1235300_novel14,MD04G1235300_novel15,MD04G1235300_novel12,MD04G1235300_novel13,MD04G1235300_novel11	MD04G1235300_novel01,MD04G1235300_novel10,MD04G1235300,MD04G1235300_novel02,MD04G1235300_novel06,MD04G1235300_novel03,MD04G1235300_novel08,MD04G1235300_novel09,MD04G1235300_novel04,MD04G1235300_novel11,MD04G1235300_novel12,MD04G1235300_novel13,MD04G1235300_novel14,MD04G1235300_novel15
Chr04	MD04G1235300	+	A3	31436552-31436613	MD04G1235300_novel03	MD04G1235300_novel01,MD04G1235300,MD04G1235300_novel02,MD04G1235300_novel06,MD04G1235300_novel07,MD04G1235300_novel08,MD04G1235300_novel09,MD04G1235300_novel04,MD04G1235300_novel10,MD04G1235300_novel11,MD04G1235300_novel12,MD04G1235300_novel13,MD04G1235300_novel14,MD04G1235300_novel15,MD04G1235300_novel16,MD04G1235300_novel03
Chr04	MD04G1235300	+	A3	31437715-31437760	MD04G1235300_novel09,MD04G1235300_novel08,MD04G1235300_novel16,MD04G1235300_novel17,MD04G1235300_novel14,MD04G1235300_novel15,MD04G1235300_novel12,MD04G1235300_novel13,MD04G1235300_novel10,MD04G1235300_novel11,MD04G1235300_novel02,MD04G1235300_novel03,MD04G1235300_novel04,MD04G1235300_novel01,MD04G1235300_novel07,MD04G1235300_novel06	MD04G1235300,MD04G1235300_novel01,MD04G1235300_novel02,MD04G1235300_novel06,MD04G1235300_novel03,MD04G1235300_novel07,MD04G1235300_novel08,MD04G1235300_novel09,MD04G1235300_novel04,MD04G1235300_novel10,MD04G1235300_novel11,MD04G1235300_novel12,MD04G1235300_novel13,MD04G1235300_novel14,MD04G1235300_novel15,MD04G1235300_novel16,MD04G1235300_novel17
Chr04	MD04G1235300	+	A3	31437970-31437982	MD04G1235300_novel04	MD04G1235300_novel01,MD04G1235300,MD04G1235300_novel02,MD04G1235300_novel06,MD04G1235300_novel03,MD04G1235300_novel07,MD04G1235300_novel08,MD04G1235300_novel09,MD04G1235300_novel10,MD04G1235300_novel11,MD04G1235300_novel12,MD04G1235300_novel13,MD04G1235300_novel14,MD04G1235300_novel15,MD04G1235300_novel16,MD04G1235300_novel17,MD04G1235300_novel04
Chr04	MD04G1235500	+	A3	31447256-31448196	MD04G1235500_novel03,MD04G1235500_novel05	MD04G1235500_novel04,MD04G1235500_novel06,MD04G1235500_novel03,MD04G1235500_novel05
Chr04	MD04G1237800	-	A3	31602086-31602079	MD04G1237800_novel02	MD04G1237800,MD04G1237800_novel05,MD04G1237800_novel04,MD04G1237800_novel03,MD04G1237800_novel01,MD04G1237800_novel02
Chr04	MD04G1237800	-	A3	31606526-31606512	MD04G1237800_novel01,MD04G1237800_novel03	MD04G1237800,MD04G1237800_novel04,MD04G1237800_novel02,MD04G1237800_novel03,MD04G1237800_novel01
Chr04	MD04G1238000	-	A3	31612927-31612899	MD04G1238000_novel02	MD04G1238000_novel01,MD04G1238000_novel02
Chr04	MD04G1239800	-	A3	31779894-31779884	MD04G1239800_novel01	MD04G1239800,MD04G1239800_novel03,MD04G1239800_novel02,MD04G1239800_novel01
Chr04	MD04G1241400	-	A3	31857583-31857563	MD04G1241400,MD04G1241400_novel03	MD04G1241400_novel02,MD04G1241400,MD04G1241400_novel03
Chr04	MD04G1241400	-	A3	31857945-31857912	MD04G1241400	MD04G1241400_novel01,MD04G1241400_novel03,MD04G1241400_novel02,MD04G1241400
Chr04	MD04G1241400	-	A3	31858195-31858178	MD04G1241400_novel01,MD04G1241400,MD04G1241400_novel02	MD04G1241400_novel03,MD04G1241400,MD04G1241400_novel01,MD04G1241400_novel02
Chr04	MD04G1241400	-	A3	31858901-31858824	MD04G1241400_novel02	MD04G1241400_novel01,MD04G1241400_novel03,MD04G1241400_novel02
Chr04	MD04G1241400	-	A3	31859083-31859079	MD04G1241400	MD04G1241400_novel03,MD04G1241400_novel02,MD04G1241400
Chr04	MD04G1241800	-	A3	31875079-31875073	MD04G1241800_novel02	MD04G1241800_novel01,MD04G1241800_novel02
Chr04	MD04G1243400	+	A3	31980369-31980372	MD04G1243400	MD04G1243400_novel01,MD04G1243400
Chr04	MD04G1243900	+	A3	32034248-32034259	MD04G1243900_novel01	MD04G1243900,MD04G1243900_novel02,MD04G1243900_novel01
Chr04	MD04G1244500	+	A3	32064406-32064573	MD04G1244500_novel03	MD04G1244500_novel01,MD04G1244500_novel03
Chr04	MD04G1245900	+	A3	32125444-32126285	MD04G1245900	MD04G1245900_novel01,MD04G1245900
Chr04	MD04G1246800	-	A3	32177645-32177580	MD04G1246800_novel05	MD04G1246800_novel09,MD04G1246800_novel05
Chr04	MD04G1246800	-	A3	32177857-32177130	MD04G1246800_novel06,MD04G1246800_novel01,MD04G1246800_novel10,MD04G1246800,MD04G1246800_novel03	MD04G1246800_novel08,MD04G1246800,MD04G1246800_novel03,MD04G1246800_novel10,MD04G1246800_novel01,MD04G1246800_novel06
Chr04	MD04G1246800	-	A3	32177857-32177580	MD04G1246800_novel05	MD04G1246800_novel08,MD04G1246800_novel05
Chr04	MD04G1246800	-	A3	32177857-32177645	MD04G1246800_novel09	MD04G1246800_novel08,MD04G1246800_novel09
Chr04	MD04G1246800	-	A3	32178382-32178379	MD04G1246800_novel01,MD04G1246800_novel02,MD04G1246800_novel03	MD04G1246800_novel10,MD04G1246800_novel09,MD04G1246800_novel02,MD04G1246800_novel03,MD04G1246800_novel01
Chr04	MD04G1247000	-	A3	32187289-32187229	MD04G1247000_novel02	MD04G1247000,MD04G1247000_novel02
Chr04	MD04G1247400	-	A3	32210745-32210740	MD04G1247400	MD04G1247400_novel02,MD04G1247400_novel01,MD04G1247400
Chr04	MD04G1247800	+	A3	32262806-32262829	MD04G1247800_novel02	MD04G1247800,MD04G1247800_novel01,MD04G1247800_novel02
Chr05	MD05G1000300	-	A3	89940-89915	MD05G1000300_novel02,MD05G1000300	MD05G1000300_novel01,MD05G1000300_novel02,MD05G1000300
Chr05	MD05G1001600	+	A3	814998-815062	MD05G1001600_novel02	MD05G1001600_novel01,MD05G1001600,MD05G1001600_novel03,MD05G1001600_novel04,MD05G1001600_novel05,MD05G1001600_novel06,MD05G1001600_novel07,MD05G1001600_novel02
Chr05	MD05G1001600	+	A3	816887-817078	MD05G1001600_novel06,MD05G1001600_novel07,MD05G1001600_novel02,MD05G1001600_novel03,MD05G1001600,MD05G1001600_novel08	MD05G1001600_novel01,MD05G1001600,MD05G1001600_novel02,MD05G1001600_novel03,MD05G1001600_novel06,MD05G1001600_novel07,MD05G1001600_novel08
Chr05	MD05G1001800	-	A3	873378-873320	MD05G1001800_novel03	MD05G1001800_novel01,MD05G1001800_novel02,MD05G1001800_novel03
Chr05	MD05G1002600	+	A3	1038709-1038744	MD05G1002600_novel03	MD05G1002600_novel01,MD05G1002600_novel04,MD05G1002600_novel03
Chr05	MD05G1002600	+	A3	1038923-1038927	MD05G1002600,MD05G1002600_novel04	MD05G1002600_novel01,MD05G1002600_novel03,MD05G1002600,MD05G1002600_novel04
Chr05	MD05G1003800	+	A3	1246592-1246595	MD05G1003800_novel03	MD05G1003800,MD05G1003800_novel01,MD05G1003800_novel02,MD05G1003800_novel05,MD05G1003800_novel07,MD05G1003800_novel04,MD05G1003800_novel06,MD05G1003800_novel03
Chr05	MD05G1003800	+	A3	1249055-1249277	MD05G1003800_novel05,MD05G1003800_novel03,MD05G1003800,MD05G1003800_novel08,MD05G1003800_novel09,MD05G1003800_novel07,MD05G1003800_novel01,MD05G1003800_novel13,MD05G1003800_novel12,MD05G1003800_novel11,MD05G1003800_novel10,MD05G1003800_novel02,MD05G1003800_novel06,MD05G1003800_novel14	MD05G1003800_novel04,MD05G1003800,MD05G1003800_novel01,MD05G1003800_novel02,MD05G1003800_novel05,MD05G1003800_novel03,MD05G1003800_novel07,MD05G1003800_novel06,MD05G1003800_novel08,MD05G1003800_novel09,MD05G1003800_novel10,MD05G1003800_novel11,MD05G1003800_novel12,MD05G1003800_novel13,MD05G1003800_novel14
Chr05	MD05G1005900	-	A3	1484753-1484683	MD05G1005900_novel01	MD05G1005900,MD05G1005900_novel01
Chr05	MD05G1006100	-	A3	1521660-1521283	MD05G1006100_novel04,MD05G1006100	MD05G1006100_novel03,MD05G1006100_novel04,MD05G1006100
Chr05	MD05G1006100	-	A3	1521819-1521792	MD05G1006100_novel02	MD05G1006100_novel04,MD05G1006100_novel02
Chr05	MD05G1006100	-	A3	1521827-1521792	MD05G1006100_novel02	MD05G1006100_novel03,MD05G1006100,MD05G1006100_novel01,MD05G1006100_novel02
Chr05	MD05G1006100	-	A3	1521827-1521819	MD05G1006100_novel04	MD05G1006100_novel03,MD05G1006100,MD05G1006100_novel01,MD05G1006100_novel04
Chr05	MD05G1008800	+	A3	1883032-1883244	MD05G1008800_novel01	MD05G1008800_novel02,MD05G1008800_novel01
Chr05	MD05G1010900	+	A3	2151794-2151798	MD05G1010900_novel02	MD05G1010900,MD05G1010900_novel01,MD05G1010900_novel02
Chr05	MD05G1011400	+	A3	2356982-2356997	MD05G1011400_novel02	MD05G1011400,MD05G1011400_novel03,MD05G1011400_novel04,MD05G1011400_novel02
Chr05	MD05G1011400	+	A3	2357315-2357356	MD05G1011400_novel04	MD05G1011400,MD05G1011400_novel04
Chr05	MD05G1011400	+	A3	2357315-2357364	MD05G1011400_novel03,MD05G1011400_novel02,MD05G1011400_novel01	MD05G1011400,MD05G1011400_novel01,MD05G1011400_novel03,MD05G1011400_novel02
Chr05	MD05G1011400	+	A3	2357356-2357364	MD05G1011400_novel03,MD05G1011400_novel02,MD05G1011400_novel01	MD05G1011400_novel04,MD05G1011400_novel01,MD05G1011400_novel03,MD05G1011400_novel02
Chr05	MD05G1012000	-	A3	2402587-2402523	MD05G1012000_novel02,MD05G1012000_novel03,MD05G1012000_novel01,MD05G1012000_novel06,MD05G1012000_novel07,MD05G1012000_novel05,MD05G1012000	MD05G1012000_novel04,MD05G1012000_novel06,MD05G1012000_novel07,MD05G1012000_novel03,MD05G1012000_novel05,MD05G1012000_novel02,MD05G1012000_novel01,MD05G1012000
Chr05	MD05G1012000	-	A3	2404699-2404630	MD05G1012000_novel05	MD05G1012000_novel03,MD05G1012000_novel02,MD05G1012000_novel01,MD05G1012000_novel04,MD05G1012000,MD05G1012000_novel05
Chr05	MD05G1012600	-	A3	2493660-2493655	MD05G1012600_novel01,MD05G1012600_novel02,MD05G1012600_novel03,MD05G1012600_novel04,MD05G1012600_novel05,MD05G1012600_novel06,MD05G1012600	MD05G1012600_novel07,MD05G1012600_novel04,MD05G1012600,MD05G1012600_novel02,MD05G1012600_novel06,MD05G1012600_novel03,MD05G1012600_novel01,MD05G1012600_novel05
Chr05	MD05G1012600	-	A3	2495584-2495570	MD05G1012600_novel01	MD05G1012600_novel04,MD05G1012600,MD05G1012600_novel02,MD05G1012600_novel06,MD05G1012600_novel07,MD05G1012600_novel03,MD05G1012600_novel01
Chr05	MD05G1013300	-	A3	2574054-2574019	MD05G1013300_novel01,MD05G1013300_novel03,MD05G1013300	MD05G1013300_novel02,MD05G1013300,MD05G1013300_novel01,MD05G1013300_novel03
Chr05	MD05G1013300	-	A3	2576660-2576652	MD05G1013300_novel01,MD05G1013300_novel02,MD05G1013300_novel03	MD05G1013300,MD05G1013300_novel02,MD05G1013300_novel01,MD05G1013300_novel03
Chr05	MD05G1017700	+	A3	3102124-3102218	MD05G1017700_novel02	MD05G1017700_novel01,MD05G1017700_novel02
Chr05	MD05G1017800	-	A3	3105767-3105762	MD05G1017800_novel01	MD05G1017800,MD05G1017800_novel04,MD05G1017800_novel02,MD05G1017800_novel01
Chr05	MD05G1020700	+	A3	3522019-3522048	MD05G1020700_novel01,MD05G1020700_novel02	MD05G1020700,MD05G1020700_novel01,MD05G1020700_novel02
Chr05	MD05G1021200	-	A3	3580296-3580197	MD05G1021200_novel02	MD05G1021200,MD05G1021200_novel04,MD05G1021200_novel03,MD05G1021200_novel02
Chr05	MD05G1021200	-	A3	3587830-3587791	MD05G1021200_novel01,MD05G1021200_novel04	MD05G1021200,MD05G1021200_novel04,MD05G1021200_novel01
Chr05	MD05G1021200	-	A3	3587833-3587791	MD05G1021200_novel01,MD05G1021200_novel04	MD05G1021200_novel02,MD05G1021200_novel03,MD05G1021200_novel04,MD05G1021200_novel01
Chr05	MD05G1021200	-	A3	3587833-3587830	MD05G1021200	MD05G1021200_novel02,MD05G1021200_novel03,MD05G1021200
Chr05	MD05G1025500	+	A3	4140603-4140660	MD05G1025500_novel01	MD05G1025500,MD05G1025500_novel02,MD05G1025500_novel03,MD05G1025500_novel01
Chr05	MD05G1025800	-	A3	4172878-4172867	MD05G1025800_novel01,MD05G1025800_novel02,MD05G1025800	MD05G1025800_novel04,MD05G1025800_novel03,MD05G1025800_novel02,MD05G1025800,MD05G1025800_novel01
Chr05	MD05G1025800	-	A3	4175361-4175354	MD05G1025800_novel01	MD05G1025800_novel02,MD05G1025800,MD05G1025800_novel03,MD05G1025800_novel01
Chr05	MD05G1027200	+	A3	4309611-4309621	MD05G1027200_novel04	MD05G1027200,MD05G1027200_novel01,MD05G1027200_novel05,MD05G1027200_novel03,MD05G1027200_novel06,MD05G1027200_novel04
Chr05	MD05G1027200	+	A3	4311235-4311300	MD05G1027200_novel03	MD05G1027200,MD05G1027200_novel01,MD05G1027200_novel02,MD05G1027200_novel05,MD05G1027200_novel04,MD05G1027200_novel06,MD05G1027200_novel03
Chr05	MD05G1029400	+	A3	4819204-4819210	MD05G1029400_novel04	MD05G1029400_novel01,MD05G1029400_novel03,MD05G1029400,MD05G1029400_novel02,MD05G1029400_novel05,MD05G1029400_novel06,MD05G1029400_novel07,MD05G1029400_novel08,MD05G1029400_novel04
Chr05	MD05G1030700	-	A3	4910624-4910330	MD05G1030700,MD05G1030700_novel02	MD05G1030700_novel01,MD05G1030700_novel05,MD05G1030700,MD05G1030700_novel02
Chr05	MD05G1030700	-	A3	4910879-4910866	MD05G1030700_novel03	MD05G1030700,MD05G1030700_novel01,MD05G1030700_novel06,MD05G1030700_novel02,MD05G1030700_novel05,MD05G1030700_novel08,MD05G1030700_novel04,MD05G1030700_novel03
Chr05	MD05G1030700	-	A3	4916863-4916792	MD05G1030700_novel04	MD05G1030700,MD05G1030700_novel01,MD05G1030700_novel06,MD05G1030700_novel02,MD05G1030700_novel05,MD05G1030700_novel03,MD05G1030700_novel07,MD05G1030700_novel04
Chr05	MD05G1033400	-	A3	5384471-5384079	MD05G1033400_novel15	MD05G1033400_novel01,MD05G1033400_novel14,MD05G1033400_novel15
Chr05	MD05G1033700	+	A3	5404388-5404411	MD05G1033700	MD05G1033700_novel02,MD05G1033700
Chr05	MD05G1033900	-	A3	5432298-5432291	MD05G1033900_novel01	MD05G1033900,MD05G1033900_novel02,MD05G1033900_novel01
Chr05	MD05G1037000	+	A3	5960412-5960431	MD05G1037000_novel03,MD05G1037000_novel02,MD05G1037000_novel01,MD05G1037000	MD05G1037000_novel04,MD05G1037000,MD05G1037000_novel02,MD05G1037000_novel01,MD05G1037000_novel03
Chr05	MD05G1037100	-	A3	5964030-5963525	MD05G1037100	MD05G1037100_novel04,MD05G1037100_novel07,MD05G1037100
Chr05	MD05G1037100	-	A3	5965094-5965088	MD05G1037100	MD05G1037100_novel02,MD05G1037100_novel01,MD05G1037100_novel07,MD05G1037100
Chr05	MD05G1037700	+	A3	6012913-6013374	MD05G1037700_novel04,MD05G1037700,MD05G1037700_novel02	MD05G1037700_novel01,MD05G1037700,MD05G1037700_novel02,MD05G1037700_novel04
Chr05	MD05G1038100	+	A3	6054454-6054472	MD05G1038100_novel02	MD05G1038100_novel01,MD05G1038100,MD05G1038100_novel03,MD05G1038100_novel02
Chr05	MD05G1038500	-	A3	6523933-6523902	MD05G1038500	MD05G1038500_novel01,MD05G1038500
Chr05	MD05G1039900	+	A3	6795420-6795475	MD05G1039900_novel01,MD05G1039900_novel02	MD05G1039900_novel03,MD05G1039900,MD05G1039900_novel01,MD05G1039900_novel02
Chr05	MD05G1039900	+	A3	6799306-6799311	MD05G1039900_novel04	MD05G1039900_novel01,MD05G1039900_novel02,MD05G1039900,MD05G1039900_novel06,MD05G1039900_novel04
Chr05	MD05G1040100	+	A3	6826798-6826822	MD05G1040100_novel01,MD05G1040100	MD05G1040100_novel02,MD05G1040100_novel01,MD05G1040100
Chr05	MD05G1040900	+	A3	6920519-6920542	MD05G1040900	MD05G1040900_novel01,MD05G1040900
Chr05	MD05G1041400	+	A3	6975099-6975172	MD05G1041400_novel03	MD05G1041400_novel02,MD05G1041400,MD05G1041400_novel01,MD05G1041400_novel03
Chr05	MD05G1041400	+	A3	6976003-6976330	MD05G1041400_novel02,MD05G1041400_novel03	MD05G1041400,MD05G1041400_novel02,MD05G1041400_novel03
Chr05	MD05G1043200	+	A3	7355487-7355490	MD05G1043200	MD05G1043200_novel02,MD05G1043200_novel06,MD05G1043200_novel07,MD05G1043200
Chr05	MD05G1043500	+	A3	7388458-7388517	MD05G1043500_novel02	MD05G1043500_novel03,MD05G1043500_novel05,MD05G1043500,MD05G1043500_novel02
Chr05	MD05G1043500	+	A3	7388517-7389050	MD05G1043500_novel01	MD05G1043500_novel02,MD05G1043500_novel01
Chr05	MD05G1044600	-	A3	7637254-7637227	MD05G1044600_novel02	MD05G1044600_novel08,MD05G1044600,MD05G1044600_novel05,MD05G1044600_novel13,MD05G1044600_novel03,MD05G1044600_novel14,MD05G1044600_novel06,MD05G1044600_novel04,MD05G1044600_novel09,MD05G1044600_novel12,MD05G1044600_novel07,MD05G1044600_novel01,MD05G1044600_novel11,MD05G1044600_novel10,MD05G1044600_novel02
Chr05	MD05G1044600	-	A3	7638283-7638280	MD05G1044600_novel12	MD05G1044600_novel08,MD05G1044600,MD05G1044600_novel05,MD05G1044600_novel13,MD05G1044600_novel03,MD05G1044600_novel02,MD05G1044600_novel14,MD05G1044600_novel06,MD05G1044600_novel04,MD05G1044600_novel09,MD05G1044600_novel07,MD05G1044600_novel01,MD05G1044600_novel11,MD05G1044600_novel10,MD05G1044600_novel12
Chr05	MD05G1044600	-	A3	7640407-7640100	MD05G1044600_novel08,MD05G1044600_novel02,MD05G1044600_novel01,MD05G1044600	MD05G1044600_novel04,MD05G1044600_novel10,MD05G1044600_novel08,MD05G1044600,MD05G1044600_novel02,MD05G1044600_novel01
Chr05	MD05G1044600	-	A3	7640418-7640100	MD05G1044600_novel02,MD05G1044600_novel01,MD05G1044600_novel08,MD05G1044600	MD05G1044600_novel03,MD05G1044600_novel08,MD05G1044600,MD05G1044600_novel02,MD05G1044600_novel01
Chr05	MD05G1044600	-	A3	7640418-7640407	MD05G1044600_novel10,MD05G1044600_novel09,MD05G1044600_novel04	MD05G1044600_novel03,MD05G1044600_novel04,MD05G1044600_novel09,MD05G1044600_novel10
Chr05	MD05G1045100	-	A3	7743572-7743560	MD05G1045100_novel03	MD05G1045100,MD05G1045100_novel01,MD05G1045100_novel02,MD05G1045100_novel03
Chr05	MD05G1045100	-	A3	7745843-7745802	MD05G1045100_novel03,MD05G1045100_novel01,MD05G1045100	MD05G1045100_novel02,MD05G1045100,MD05G1045100_novel01,MD05G1045100_novel03
Chr05	MD05G1045100	-	A3	7747554-7747466	MD05G1045100_novel03,MD05G1045100_novel01,MD05G1045100	MD05G1045100_novel02,MD05G1045100,MD05G1045100_novel01,MD05G1045100_novel03
Chr05	MD05G1045700	+	A3	7817258-7817313	MD05G1045700_novel01,MD05G1045700,MD05G1045700_novel02,MD05G1045700_novel03	MD05G1045700_novel04,MD05G1045700_novel01,MD05G1045700_novel03,MD05G1045700_novel02,MD05G1045700
Chr05	MD05G1045700	+	A3	7818053-7818064	MD05G1045700_novel01	MD05G1045700_novel03,MD05G1045700_novel02,MD05G1045700,MD05G1045700_novel04,MD05G1045700_novel01
Chr05	MD05G1045700	+	A3	7820620-7820632	MD05G1045700	MD05G1045700_novel01,MD05G1045700_novel03,MD05G1045700_novel02,MD05G1045700
Chr05	MD05G1047200	+	A3	7985448-7985454	MD05G1047200	MD05G1047200_novel01,MD05G1047200_novel02,MD05G1047200_novel03,MD05G1047200
Chr05	MD05G1047200	+	A3	7988966-7988969	MD05G1047200	MD05G1047200_novel01,MD05G1047200_novel02,MD05G1047200_novel03,MD05G1047200_novel04,MD05G1047200
Chr05	MD05G1047700	-	A3	8116469-8115969	MD05G1047700,MD05G1047700_novel02,MD05G1047700_novel01	MD05G1047700_novel04,MD05G1047700,MD05G1047700_novel02,MD05G1047700_novel01
Chr05	MD05G1048200	+	A3	8198599-8198644	MD05G1048200_novel02,MD05G1048200	MD05G1048200_novel01,MD05G1048200,MD05G1048200_novel02
Chr05	MD05G1048400	+	A3	8232572-8232575	MD05G1048400,MD05G1048400_novel06	MD05G1048400_novel03,MD05G1048400_novel04,MD05G1048400_novel05,MD05G1048400,MD05G1048400_novel06
Chr05	MD05G1048400	+	A3	8232909-8233183	MD05G1048400,MD05G1048400_novel01,MD05G1048400_novel03,MD05G1048400_novel02,MD05G1048400_novel04,MD05G1048400_novel06	MD05G1048400_novel05,MD05G1048400_novel01,MD05G1048400_novel02,MD05G1048400_novel03,MD05G1048400,MD05G1048400_novel04,MD05G1048400_novel06
Chr05	MD05G1049900	-	A3	8652818-8652794	MD05G1049900_novel05	MD05G1049900_novel07,MD05G1049900_novel03,MD05G1049900_novel04,MD05G1049900,MD05G1049900_novel06,MD05G1049900_novel02,MD05G1049900_novel05
Chr05	MD05G1050600	+	A3	8756413-8756591	MD05G1050600_novel02,MD05G1050600_novel03,MD05G1050600_novel01,MD05G1050600_novel06,MD05G1050600_novel07,MD05G1050600_novel04,MD05G1050600_novel05,MD05G1050600_novel09,MD05G1050600_novel10,MD05G1050600	MD05G1050600_novel08,MD05G1050600_novel01,MD05G1050600_novel03,MD05G1050600,MD05G1050600_novel05,MD05G1050600_novel04,MD05G1050600_novel06,MD05G1050600_novel07,MD05G1050600_novel02,MD05G1050600_novel09,MD05G1050600_novel10
Chr05	MD05G1050600	+	A3	8757055-8757074	MD05G1050600_novel02,MD05G1050600_novel06,MD05G1050600_novel07,MD05G1050600_novel04,MD05G1050600_novel09,MD05G1050600_novel11,MD05G1050600	MD05G1050600_novel01,MD05G1050600_novel03,MD05G1050600_novel05,MD05G1050600_novel10,MD05G1050600,MD05G1050600_novel04,MD05G1050600_novel06,MD05G1050600_novel07,MD05G1050600_novel02,MD05G1050600_novel09,MD05G1050600_novel11
Chr05	MD05G1050600	+	A3	8761189-8761199	MD05G1050600_novel02,MD05G1050600_novel08	MD05G1050600_novel01,MD05G1050600_novel03,MD05G1050600,MD05G1050600_novel04,MD05G1050600_novel07,MD05G1050600_novel09,MD05G1050600_novel10,MD05G1050600_novel11,MD05G1050600_novel12,MD05G1050600_novel02,MD05G1050600_novel08
Chr05	MD05G1052900	-	A3	9033925-9033907	MD05G1052900	MD05G1052900_novel04,MD05G1052900_novel02,MD05G1052900_novel03,MD05G1052900_novel01,MD05G1052900
Chr05	MD05G1052900	-	A3	9034258-9034225	MD05G1052900_novel02	MD05G1052900,MD05G1052900_novel03,MD05G1052900_novel01,MD05G1052900_novel02
Chr05	MD05G1052900	-	A3	9036624-9036614	MD05G1052900_novel03,MD05G1052900_novel02,MD05G1052900,MD05G1052900_novel04	MD05G1052900_novel01,MD05G1052900_novel04,MD05G1052900_novel02,MD05G1052900,MD05G1052900_novel03
Chr05	MD05G1054700	+	A3	9385299-9385341	MD05G1054700_novel01	MD05G1054700,MD05G1054700_novel01
Chr05	MD05G1059300	+	A3	10353507-10353613	MD05G1059300_novel06	MD05G1059300,MD05G1059300_novel02,MD05G1059300_novel03,MD05G1059300_novel04,MD05G1059300_novel05,MD05G1059300_novel06
Chr05	MD05G1059400	+	A3	10378460-10378485	MD05G1059400,MD05G1059400_novel03,MD05G1059400_novel01	MD05G1059400_novel02,MD05G1059400_novel04,MD05G1059400,MD05G1059400_novel01,MD05G1059400_novel03
Chr05	MD05G1059600	-	A3	10402297-10402263	MD05G1059600_novel02	MD05G1059600,MD05G1059600_novel04,MD05G1059600_novel01,MD05G1059600_novel02
Chr05	MD05G1060400	+	A3	10486518-10487243	MD05G1060400,MD05G1060400_novel02	MD05G1060400_novel01,MD05G1060400,MD05G1060400_novel02
Chr05	MD05G1062400	-	A3	10966114-10966105	MD05G1062400,MD05G1062400_novel02	MD05G1062400_novel01,MD05G1062400_novel02,MD05G1062400
Chr05	MD05G1062600	+	A3	10998550-10998611	MD05G1062600_novel03,MD05G1062600_novel02,MD05G1062600,MD05G1062600_novel04	MD05G1062600_novel01,MD05G1062600,MD05G1062600_novel02,MD05G1062600_novel03,MD05G1062600_novel04
Chr05	MD05G1063200	+	A3	11103812-11104052	MD05G1063200	MD05G1063200_novel03,MD05G1063200
Chr05	MD05G1063400	-	A3	11153590-11153584	MD05G1063400_novel02,MD05G1063400_novel01,MD05G1063400	MD05G1063400_novel03,MD05G1063400_novel02,MD05G1063400,MD05G1063400_novel01
Chr05	MD05G1067500	+	A3	12708036-12708052	MD05G1067500_novel09,MD05G1067500_novel08,MD05G1067500_novel07,MD05G1067500_novel02,MD05G1067500_novel01,MD05G1067500,MD05G1067500_novel06,MD05G1067500_novel10,MD05G1067500_novel11,MD05G1067500_novel12	MD05G1067500_novel03,MD05G1067500,MD05G1067500_novel02,MD05G1067500_novel01,MD05G1067500_novel06,MD05G1067500_novel07,MD05G1067500_novel08,MD05G1067500_novel09,MD05G1067500_novel10,MD05G1067500_novel11,MD05G1067500_novel12
Chr05	MD05G1067500	+	A3	12708864-12708871	MD05G1067500_novel04	MD05G1067500,MD05G1067500_novel01,MD05G1067500_novel03,MD05G1067500_novel06,MD05G1067500_novel07,MD05G1067500_novel08,MD05G1067500_novel05,MD05G1067500_novel09,MD05G1067500_novel10,MD05G1067500_novel11,MD05G1067500_novel12,MD05G1067500_novel04
Chr05	MD05G1067900	-	A3	12766380-12766366	MD05G1067900_novel04	MD05G1067900_novel06,MD05G1067900,MD05G1067900_novel05,MD05G1067900_novel01,MD05G1067900_novel03,MD05G1067900_novel02,MD05G1067900_novel04
Chr05	MD05G1067900	-	A3	12766665-12766621	MD05G1067900,MD05G1067900_novel06,MD05G1067900_novel05,MD05G1067900_novel04,MD05G1067900_novel02,MD05G1067900_novel01	MD05G1067900_novel03,MD05G1067900_novel04,MD05G1067900_novel06,MD05G1067900,MD05G1067900_novel05,MD05G1067900_novel01,MD05G1067900_novel02
Chr05	MD05G1067900	-	A3	12767968-12767901	MD05G1067900_novel05	MD05G1067900_novel04,MD05G1067900_novel06,MD05G1067900,MD05G1067900_novel01,MD05G1067900_novel03,MD05G1067900_novel02,MD05G1067900_novel05
Chr05	MD05G1071700	-	A3	15116964-15116622	MD05G1071700_novel01	MD05G1071700_novel02,MD05G1071700_novel05,MD05G1071700_novel01
Chr05	MD05G1071900	+	A3	15151199-15151245	MD05G1071900	MD05G1071900_novel01,MD05G1071900
Chr05	MD05G1077400	+	A3	16541090-16541108	MD05G1077400_novel07,MD05G1077400_novel06,MD05G1077400_novel05,MD05G1077400_novel04,MD05G1077400	MD05G1077400_novel03,MD05G1077400_novel07,MD05G1077400_novel06,MD05G1077400_novel04,MD05G1077400_novel05,MD05G1077400
Chr05	MD05G1077400	+	A3	16541705-16542232	MD05G1077400_novel03,MD05G1077400_novel07,MD05G1077400,MD05G1077400_novel04	MD05G1077400_novel05,MD05G1077400_novel07,MD05G1077400_novel03,MD05G1077400_novel04,MD05G1077400
Chr05	MD05G1079500	+	A3	16714190-16714204	MD05G1079500_novel01,MD05G1079500_novel03,MD05G1079500_novel04,MD05G1079500	MD05G1079500_novel02,MD05G1079500,MD05G1079500_novel01,MD05G1079500_novel03,MD05G1079500_novel04
Chr05	MD05G1081400	-	A3	17045429-17045389	MD05G1081400_novel01	MD05G1081400,MD05G1081400_novel01
Chr05	MD05G1082000	+	A3	17177338-17177340	MD05G1082000	MD05G1082000_novel01,MD05G1082000_novel02,MD05G1082000
Chr05	MD05G1082300	+	A3	17202729-17202743	MD05G1082300_novel11,MD05G1082300_novel10,MD05G1082300,MD05G1082300_novel08,MD05G1082300_novel09,MD05G1082300_novel01,MD05G1082300_novel12,MD05G1082300_novel03,MD05G1082300_novel04,MD05G1082300_novel05,MD05G1082300_novel06,MD05G1082300_novel07	MD05G1082300_novel02,MD05G1082300,MD05G1082300_novel01,MD05G1082300_novel12,MD05G1082300_novel04,MD05G1082300_novel11,MD05G1082300_novel08,MD05G1082300_novel05,MD05G1082300_novel06,MD05G1082300_novel07,MD05G1082300_novel09,MD05G1082300_novel10,MD05G1082300_novel03
Chr05	MD05G1082300	+	A3	17204921-17204932	MD05G1082300,MD05G1082300_novel09,MD05G1082300_novel05,MD05G1082300_novel13,MD05G1082300_novel01,MD05G1082300_novel02,MD05G1082300_novel03,MD05G1082300_novel04,MD05G1082300_novel11	MD05G1082300_novel07,MD05G1082300,MD05G1082300_novel01,MD05G1082300_novel04,MD05G1082300_novel11,MD05G1082300_novel05,MD05G1082300_novel09,MD05G1082300_novel02,MD05G1082300_novel03,MD05G1082300_novel13
Chr05	MD05G1082300	+	A3	17206292-17206296	MD05G1082300_novel03	MD05G1082300_novel04,MD05G1082300_novel03
Chr05	MD05G1082300	+	A3	17206292-17206377	MD05G1082300,MD05G1082300_novel09,MD05G1082300_novel05,MD05G1082300_novel13,MD05G1082300_novel01,MD05G1082300_novel02,MD05G1082300_novel10,MD05G1082300_novel11,MD05G1082300_novel06,MD05G1082300_novel07	MD05G1082300_novel04,MD05G1082300,MD05G1082300_novel01,MD05G1082300_novel11,MD05G1082300_novel05,MD05G1082300_novel06,MD05G1082300_novel07,MD05G1082300_novel09,MD05G1082300_novel10,MD05G1082300_novel02,MD05G1082300_novel13
Chr05	MD05G1082300	+	A3	17206296-17206377	MD05G1082300,MD05G1082300_novel09,MD05G1082300_novel05,MD05G1082300_novel13,MD05G1082300_novel01,MD05G1082300_novel02,MD05G1082300_novel10,MD05G1082300_novel11,MD05G1082300_novel06,MD05G1082300_novel07	MD05G1082300_novel03,MD05G1082300,MD05G1082300_novel01,MD05G1082300_novel11,MD05G1082300_novel05,MD05G1082300_novel06,MD05G1082300_novel07,MD05G1082300_novel09,MD05G1082300_novel10,MD05G1082300_novel02,MD05G1082300_novel13
Chr05	MD05G1082700	-	A3	17273038-17273032	MD05G1082700_novel01	MD05G1082700,MD05G1082700_novel01
Chr05	MD05G1084200	+	A3	17697292-17697314	MD05G1084200_novel01	MD05G1084200,MD05G1084200_novel04,MD05G1084200_novel05,MD05G1084200_novel01
Chr05	MD05G1084200	+	A3	17697292-17697755	MD05G1084200_novel02	MD05G1084200_novel04,MD05G1084200_novel02
Chr05	MD05G1084800	-	A3	17734870-17734864	MD05G1084800_novel04,MD05G1084800_novel03	MD05G1084800,MD05G1084800_novel01,MD05G1084800_novel02,MD05G1084800_novel05,MD05G1084800_novel06,MD05G1084800_novel04,MD05G1084800_novel03
Chr05	MD05G1084800	-	A3	17735289-17735245	MD05G1084800_novel05,MD05G1084800_novel04,MD05G1084800_novel06,MD05G1084800_novel03	MD05G1084800,MD05G1084800_novel04,MD05G1084800_novel05,MD05G1084800_novel03,MD05G1084800_novel06
Chr05	MD05G1086000	+	A3	18078467-18078507	MD05G1086000_novel03,MD05G1086000_novel02	MD05G1086000_novel01,MD05G1086000_novel02,MD05G1086000_novel03
Chr05	MD05G1086000	+	A3	18078700-18078717	MD05G1086000_novel03	MD05G1086000_novel01,MD05G1086000_novel03
Chr05	MD05G1086000	+	A3	18079080-18079196	MD05G1086000	MD05G1086000_novel01,MD05G1086000_novel02,MD05G1086000
Chr05	MD05G1086900	+	A3	18529718-18529720	MD05G1086900	MD05G1086900_novel01,MD05G1086900
Chr05	MD05G1093000	+	A3	19774079-19774105	MD05G1093000_novel02	MD05G1093000_novel03,MD05G1093000_novel01,MD05G1093000_novel05,MD05G1093000_novel02
Chr05	MD05G1093000	+	A3	19774261-19774380	MD05G1093000_novel05,MD05G1093000_novel01,MD05G1093000_novel02	MD05G1093000_novel07,MD05G1093000_novel02,MD05G1093000_novel01,MD05G1093000_novel05
Chr05	MD05G1095900	-	A3	20197455-20197449	MD05G1095900	MD05G1095900_novel02,MD05G1095900
Chr05	MD05G1097100	-	A3	20298864-20298391	MD05G1097100	MD05G1097100_novel01,MD05G1097100
Chr05	MD05G1098200	-	A3	20411163-20411157	MD05G1098200_novel02,MD05G1098200	MD05G1098200_novel01,MD05G1098200_novel02,MD05G1098200
Chr05	MD05G1100200	+	A3	20789547-20789840	MD05G1100200_novel04	MD05G1100200_novel05,MD05G1100200_novel04
Chr05	MD05G1100500	-	A3	20847205-20847193	MD05G1100500_novel04	MD05G1100500_novel02,MD05G1100500_novel01,MD05G1100500_novel03,MD05G1100500,MD05G1100500_novel04
Chr05	MD05G1101600	-	A3	20969747-20969743	MD05G1101600_novel10,MD05G1101600_novel02,MD05G1101600_novel01,MD05G1101600_novel07,MD05G1101600_novel04,MD05G1101600,MD05G1101600_novel03	MD05G1101600_novel08,MD05G1101600_novel05,MD05G1101600_novel04,MD05G1101600,MD05G1101600_novel10,MD05G1101600_novel02,MD05G1101600_novel03,MD05G1101600_novel01,MD05G1101600_novel07
Chr05	MD05G1101600	-	A3	20971670-20971665	MD05G1101600_novel10,MD05G1101600_novel09	MD05G1101600_novel04,MD05G1101600,MD05G1101600_novel02,MD05G1101600_novel01,MD05G1101600_novel07,MD05G1101600_novel08,MD05G1101600_novel05,MD05G1101600_novel10,MD05G1101600_novel09
Chr05	MD05G1101600	-	A3	20971917-20971915	MD05G1101600	MD05G1101600_novel04,MD05G1101600_novel10,MD05G1101600_novel02,MD05G1101600_novel03,MD05G1101600_novel07,MD05G1101600_novel08,MD05G1101600_novel05,MD05G1101600_novel09,MD05G1101600
Chr05	MD05G1105600	-	A3	21889182-21889172	MD05G1105600_novel08,MD05G1105600_novel05,MD05G1105600_novel03,MD05G1105600_novel02,MD05G1105600_novel10	MD05G1105600_novel01,MD05G1105600,MD05G1105600_novel09,MD05G1105600_novel12,MD05G1105600_novel07,MD05G1105600_novel04,MD05G1105600_novel06,MD05G1105600_novel08,MD05G1105600_novel02,MD05G1105600_novel03,MD05G1105600_novel10,MD05G1105600_novel05
Chr05	MD05G1105600	-	A3	21889606-21889564	MD05G1105600_novel03	MD05G1105600_novel01,MD05G1105600,MD05G1105600_novel08,MD05G1105600_novel09,MD05G1105600_novel02,MD05G1105600_novel13,MD05G1105600_novel10,MD05G1105600_novel06,MD05G1105600_novel05,MD05G1105600_novel11,MD05G1105600_novel03
Chr05	MD05G1107100	+	A3	22040536-22040562	MD05G1107100_novel03,MD05G1107100_novel06,MD05G1107100_novel04,MD05G1107100	MD05G1107100_novel05,MD05G1107100_novel03,MD05G1107100_novel04,MD05G1107100_novel06,MD05G1107100
Chr05	MD05G1107100	+	A3	22040536-22041046	MD05G1107100_novel01	MD05G1107100_novel05,MD05G1107100_novel01
Chr05	MD05G1107100	+	A3	22040562-22041046	MD05G1107100_novel01	MD05G1107100_novel03,MD05G1107100_novel04,MD05G1107100_novel06,MD05G1107100_novel01
Chr05	MD05G1107800	-	A3	22139477-22139467	MD05G1107800,MD05G1107800_novel05,MD05G1107800_novel04,MD05G1107800_novel02	MD05G1107800_novel01,MD05G1107800_novel02,MD05G1107800,MD05G1107800_novel04,MD05G1107800_novel05
Chr05	MD05G1111300	-	A3	22838533-22838530	MD05G1111300_novel02,MD05G1111300	MD05G1111300_novel01,MD05G1111300,MD05G1111300_novel02
Chr05	MD05G1111300	-	A3	22840626-22840622	MD05G1111300_novel01	MD05G1111300,MD05G1111300_novel02,MD05G1111300_novel01
Chr05	MD05G1113900	-	A3	23263861-23263857	MD05G1113900_novel04	MD05G1113900_novel01,MD05G1113900_novel06,MD05G1113900_novel08,MD05G1113900_novel02,MD05G1113900_novel03,MD05G1113900,MD05G1113900_novel05,MD05G1113900_novel04
Chr05	MD05G1113900	-	A3	23266235-23266217	MD05G1113900,MD05G1113900_novel02,MD05G1113900_novel07,MD05G1113900_novel06,MD05G1113900_novel05,MD05G1113900_novel04,MD05G1113900_novel08	MD05G1113900_novel03,MD05G1113900_novel06,MD05G1113900_novel08,MD05G1113900_novel02,MD05G1113900_novel04,MD05G1113900,MD05G1113900_novel05,MD05G1113900_novel07
Chr05	MD05G1113900	-	A3	23266518-23266509	MD05G1113900_novel01	MD05G1113900_novel06,MD05G1113900_novel02,MD05G1113900,MD05G1113900_novel01
Chr05	MD05G1113900	-	A3	23266521-23266509	MD05G1113900_novel01	MD05G1113900_novel04,MD05G1113900_novel03,MD05G1113900_novel05,MD05G1113900_novel01
Chr05	MD05G1113900	-	A3	23266521-23266518	MD05G1113900_novel02,MD05G1113900,MD05G1113900_novel06	MD05G1113900_novel04,MD05G1113900_novel03,MD05G1113900_novel05,MD05G1113900_novel06,MD05G1113900_novel02,MD05G1113900
Chr05	MD05G1113900	-	A3	23267214-23267195	MD05G1113900_novel01	MD05G1113900_novel06,MD05G1113900_novel02,MD05G1113900_novel04,MD05G1113900_novel03,MD05G1113900,MD05G1113900_novel05,MD05G1113900_novel01
Chr05	MD05G1115200	-	A3	23636291-23635679	MD05G1115200	MD05G1115200_novel01,MD05G1115200
Chr05	MD05G1115800	-	A3	23674943-23674878	MD05G1115800_novel04,MD05G1115800_novel02	MD05G1115800_novel01,MD05G1115800_novel02,MD05G1115800_novel04
Chr05	MD05G1116500	+	A3	23778444-23778449	MD05G1116500_novel02	MD05G1116500,MD05G1116500_novel01,MD05G1116500_novel03,MD05G1116500_novel04,MD05G1116500_novel02
Chr05	MD05G1116700	+	A3	23787150-23787158	MD05G1116700_novel02,MD05G1116700,MD05G1116700_novel03	MD05G1116700_novel05,MD05G1116700,MD05G1116700_novel02,MD05G1116700_novel03
Chr05	MD05G1120900	+	A3	24364610-24364614	MD05G1120900_novel04	MD05G1120900_novel01,MD05G1120900,MD05G1120900_novel03,MD05G1120900_novel05,MD05G1120900_novel04
Chr05	MD05G1122500	+	A3	24527133-24527195	MD05G1122500_novel02,MD05G1122500_novel01	MD05G1122500,MD05G1122500_novel03,MD05G1122500_novel01,MD05G1122500_novel02
Chr05	MD05G1123200	-	A3	24581602-24581565	MD05G1123200_novel02,MD05G1123200_novel01	MD05G1123200,MD05G1123200_novel03,MD05G1123200_novel01,MD05G1123200_novel02
Chr05	MD05G1123800	-	A3	24617817-24616622	MD05G1123800	MD05G1123800_novel02,MD05G1123800
Chr05	MD05G1124600	+	A3	24678283-24678304	MD05G1124600_novel05	MD05G1124600,MD05G1124600_novel01,MD05G1124600_novel04,MD05G1124600_novel02,MD05G1124600_novel03,MD05G1124600_novel06,MD05G1124600_novel05
Chr05	MD05G1124600	+	A3	24679686-24679691	MD05G1124600_novel02	MD05G1124600,MD05G1124600_novel05,MD05G1124600_novel02
Chr05	MD05G1124900	+	A3	24722774-24722790	MD05G1124900_novel01	MD05G1124900_novel02,MD05G1124900_novel03,MD05G1124900_novel01
Chr05	MD05G1125000	+	A3	24738638-24738667	MD05G1125000_novel01	MD05G1125000,MD05G1125000_novel02,MD05G1125000_novel03,MD05G1125000_novel04,MD05G1125000_novel05,MD05G1125000_novel01
Chr05	MD05G1126500	-	A3	24965725-24965456	MD05G1126500_novel01	MD05G1126500_novel04,MD05G1126500_novel03,MD05G1126500_novel01
Chr05	MD05G1129900	-	A3	25425314-25425301	MD05G1129900_novel09	MD05G1129900_novel03,MD05G1129900_novel04,MD05G1129900_novel05,MD05G1129900,MD05G1129900_novel06,MD05G1129900_novel01,MD05G1129900_novel02,MD05G1129900_novel09
Chr05	MD05G1131700	-	A3	25716204-25716177	MD05G1131700	MD05G1131700_novel01,MD05G1131700
Chr05	MD05G1134900	-	A3	26321833-26321779	MD05G1134900	MD05G1134900_novel01,MD05G1134900
Chr05	MD05G1135000	-	A3	26332817-26332797	MD05G1135000	MD05G1135000_novel01,MD05G1135000
Chr05	MD05G1135500	+	A3	26373372-26373384	MD05G1135500_novel05	MD05G1135500,MD05G1135500_novel02,MD05G1135500_novel03,MD05G1135500_novel04,MD05G1135500_novel06,MD05G1135500_novel07,MD05G1135500_novel08,MD05G1135500_novel09,MD05G1135500_novel10,MD05G1135500_novel05
Chr05	MD05G1138200	+	A3	26860744-26860758	MD05G1138200_novel03	MD05G1138200_novel01,MD05G1138200_novel04,MD05G1138200_novel02,MD05G1138200_novel03
Chr05	MD05G1138200	+	A3	26861041-26861055	MD05G1138200_novel03,MD05G1138200_novel02,MD05G1138200_novel01,MD05G1138200_novel06	MD05G1138200_novel04,MD05G1138200_novel05,MD05G1138200_novel01,MD05G1138200_novel03,MD05G1138200_novel02,MD05G1138200_novel06
Chr05	MD05G1138300	-	A3	26868769-26868763	MD05G1138300_novel03	MD05G1138300_novel02,MD05G1138300_novel03
Chr05	MD05G1143000	-	A3	27395340-27395331	MD05G1143000_novel01	MD05G1143000,MD05G1143000_novel01
Chr05	MD05G1143500	+	A3	27470205-27470977	MD05G1143500_novel10	MD05G1143500_novel12,MD05G1143500_novel10
Chr05	MD05G1143500	+	A3	27472343-27472381	MD05G1143500_novel20	MD05G1143500_novel21,MD05G1143500_novel20
Chr05	MD05G1144500	-	A3	27613735-27613726	MD05G1144500,MD05G1144500_novel02	MD05G1144500_novel01,MD05G1144500,MD05G1144500_novel02
Chr05	MD05G1145700	-	A3	27672772-27672767	MD05G1145700_novel01	MD05G1145700,MD05G1145700_novel05,MD05G1145700_novel03,MD05G1145700_novel02,MD05G1145700_novel01
Chr05	MD05G1145700	-	A3	27681023-27680773	MD05G1145700_novel02,MD05G1145700	MD05G1145700_novel01,MD05G1145700,MD05G1145700_novel02
Chr05	MD05G1146300	+	A3	27717195-27717200	MD05G1146300	MD05G1146300_novel01,MD05G1146300_novel02,MD05G1146300
Chr05	MD05G1152500	+	A3	28336989-28337034	MD05G1152500_novel01	MD05G1152500_novel02,MD05G1152500_novel01
Chr05	MD05G1157900	-	A3	28725839-28725816	MD05G1157900_novel09,MD05G1157900_novel03,MD05G1157900_novel02,MD05G1157900_novel01,MD05G1157900,MD05G1157900_novel06	MD05G1157900_novel05,MD05G1157900_novel06,MD05G1157900,MD05G1157900_novel02,MD05G1157900_novel09,MD05G1157900_novel03,MD05G1157900_novel01
Chr05	MD05G1158000	+	A3	28730573-28730708	MD05G1158000	MD05G1158000_novel01,MD05G1158000
Chr05	MD05G1158200	-	A3	28741083-28741033	MD05G1158200_novel01	MD05G1158200,MD05G1158200_novel01
Chr05	MD05G1158500	+	A3	28761973-28762007	MD05G1158500_novel03	MD05G1158500,MD05G1158500_novel01,MD05G1158500_novel02,MD05G1158500_novel03
Chr05	MD05G1162100	-	A3	29076626-29076610	MD05G1162100_novel04,MD05G1162100_novel03,MD05G1162100_novel01	MD05G1162100,MD05G1162100_novel06,MD05G1162100_novel05,MD05G1162100_novel02,MD05G1162100_novel01,MD05G1162100_novel04,MD05G1162100_novel03
Chr05	MD05G1162100	-	A3	29077761-29077752	MD05G1162100_novel05,MD05G1162100_novel03,MD05G1162100_novel02,MD05G1162100_novel01	MD05G1162100,MD05G1162100_novel01,MD05G1162100_novel05,MD05G1162100_novel02,MD05G1162100_novel03
Chr05	MD05G1163900	-	A3	29288309-29288299	MD05G1163900_novel03,MD05G1163900_novel04,MD05G1163900	MD05G1163900_novel01,MD05G1163900_novel03,MD05G1163900,MD05G1163900_novel04
Chr05	MD05G1169100	+	A3	29898112-29898125	MD05G1169100_novel02,MD05G1169100_novel01,MD05G1169100	MD05G1169100_novel03,MD05G1169100,MD05G1169100_novel01,MD05G1169100_novel02
Chr05	MD05G1169200	+	A3	29911928-29911931	MD05G1169200	MD05G1169200_novel02,MD05G1169200
Chr05	MD05G1170400	+	A3	29992717-29992726	MD05G1170400	MD05G1170400_novel01,MD05G1170400_novel02,MD05G1170400
Chr05	MD05G1170700	+	A3	30029213-30029232	MD05G1170700_novel01,MD05G1170700_novel03,MD05G1170700	MD05G1170700_novel05,MD05G1170700_novel01,MD05G1170700_novel03,MD05G1170700
Chr05	MD05G1174400	+	A3	30246376-30246388	MD05G1174400_novel10	MD05G1174400_novel01,MD05G1174400_novel06,MD05G1174400_novel03,MD05G1174400_novel08,MD05G1174400_novel04,MD05G1174400_novel07,MD05G1174400_novel09,MD05G1174400,MD05G1174400_novel10
Chr05	MD05G1174400	+	A3	30251788-30251791	MD05G1174400_novel09,MD05G1174400_novel08,MD05G1174400,MD05G1174400_novel01,MD05G1174400_novel06	MD05G1174400_novel02,MD05G1174400_novel01,MD05G1174400_novel06,MD05G1174400_novel08,MD05G1174400_novel09,MD05G1174400
Chr05	MD05G1177200	-	A3	30443575-30443491	MD05G1177200_novel02	MD05G1177200,MD05G1177200_novel01,MD05G1177200_novel02
Chr05	MD05G1177200	-	A3	30444793-30444790	MD05G1177200	MD05G1177200_novel01,MD05G1177200_novel02,MD05G1177200
Chr05	MD05G1179100	-	A3	30681529-30681430	MD05G1179100_novel06	MD05G1179100_novel05,MD05G1179100_novel06
Chr05	MD05G1179200	-	A3	30692713-30692306	MD05G1179200_novel01	MD05G1179200_novel02,MD05G1179200_novel01
Chr05	MD05G1184100	+	A3	31254829-31254856	MD05G1184100_novel02,MD05G1184100_novel01	MD05G1184100_novel03,MD05G1184100_novel01,MD05G1184100_novel02
Chr05	MD05G1184100	+	A3	31254829-31254953	MD05G1184100	MD05G1184100_novel03,MD05G1184100
Chr05	MD05G1184100	+	A3	31254856-31254953	MD05G1184100	MD05G1184100_novel02,MD05G1184100
Chr05	MD05G1184100	+	A3	31256930-31257340	MD05G1184100_novel05,MD05G1184100_novel03,MD05G1184100_novel02,MD05G1184100_novel01,MD05G1184100	MD05G1184100_novel04,MD05G1184100_novel01,MD05G1184100_novel02,MD05G1184100_novel03,MD05G1184100,MD05G1184100_novel05
Chr05	MD05G1184900	-	A3	31339693-31339671	MD05G1184900,MD05G1184900_novel02,MD05G1184900_novel01	MD05G1184900_novel06,MD05G1184900,MD05G1184900_novel01,MD05G1184900_novel02
Chr05	MD05G1185000	-	A3	31355044-31354929	MD05G1185000_novel01	MD05G1185000,MD05G1185000_novel01
Chr05	MD05G1185300	-	A3	31402077-31402054	MD05G1185300_novel01	MD05G1185300,MD05G1185300_novel01
Chr05	MD05G1185600	+	A3	31439170-31439176	MD05G1185600_novel03	MD05G1185600_novel01,MD05G1185600,MD05G1185600_novel02,MD05G1185600_novel03
Chr05	MD05G1185600	+	A3	31440692-31440867	MD05G1185600_novel01	MD05G1185600_novel03,MD05G1185600,MD05G1185600_novel02,MD05G1185600_novel01
Chr05	MD05G1186700	+	A3	31476723-31476778	MD05G1186700	MD05G1186700_novel01,MD05G1186700_novel02,MD05G1186700
Chr05	MD05G1186700	+	A3	31481693-31481711	MD05G1186700_novel02,MD05G1186700	MD05G1186700_novel01,MD05G1186700,MD05G1186700_novel02
Chr05	MD05G1187100	+	A3	31521070-31521077	MD05G1187100_novel06	MD05G1187100_novel05,MD05G1187100_novel06
Chr05	MD05G1187100	+	A3	31522249-31522264	MD05G1187100_novel11,MD05G1187100_novel10	MD05G1187100,MD05G1187100_novel01,MD05G1187100_novel02,MD05G1187100_novel17,MD05G1187100_novel04,MD05G1187100_novel18,MD05G1187100_novel20,MD05G1187100_novel05,MD05G1187100_novel21,MD05G1187100_novel06,MD05G1187100_novel03,MD05G1187100_novel07,MD05G1187100_novel22,MD05G1187100_novel14,MD05G1187100_novel19,MD05G1187100_novel23,MD05G1187100_novel08,MD05G1187100_novel09,MD05G1187100_novel15,MD05G118…
Chr05	MD05G1187100	+	A3	31522997-31523018	MD05G1187100_novel06,MD05G1187100_novel23,MD05G1187100_novel21,MD05G1187100_novel08,MD05G1187100_novel28,MD05G1187100_novel07,MD05G1187100_novel22,MD05G1187100_novel01,MD05G1187100_novel02,MD05G1187100_novel20,MD05G1187100_novel03,MD05G1187100,MD05G1187100_novel24,MD05G1187100_novel25,MD05G1187100_novel26,MD05G1187100_novel27,MD05G1187100_novel19,MD05G1187100_novel18,MD05G1187100_novel04,MD05G118…	MD05G1187100_novel13,MD05G1187100,MD05G1187100_novel01,MD05G1187100_novel02,MD05G1187100_novel17,MD05G1187100_novel04,MD05G1187100_novel18,MD05G1187100_novel20,MD05G1187100_novel05,MD05G1187100_novel21,MD05G1187100_novel06,MD05G1187100_novel03,MD05G1187100_novel07,MD05G1187100_novel22,MD05G1187100_novel14,MD05G1187100_novel19,MD05G1187100_novel23,MD05G1187100_novel08,MD05G1187100_novel09,MD05G118…
Chr05	MD05G1187100	+	A3	31524948-31524958	MD05G1187100_novel20,MD05G1187100,MD05G1187100_novel01,MD05G1187100_novel33,MD05G1187100_novel18,MD05G1187100_novel31,MD05G1187100_novel30,MD05G1187100_novel15,MD05G1187100_novel19,MD05G1187100_novel16,MD05G1187100_novel11,MD05G1187100_novel10,MD05G1187100_novel13,MD05G1187100_novel12,MD05G1187100_novel22,MD05G1187100_novel23,MD05G1187100_novel32,MD05G1187100_novel14,MD05G1187100_novel07,MD05G118…	MD05G1187100_novel03,MD05G1187100,MD05G1187100_novel01,MD05G1187100_novel04,MD05G1187100_novel18,MD05G1187100_novel16,MD05G1187100_novel20,MD05G1187100_novel05,MD05G1187100_novel21,MD05G1187100_novel06,MD05G1187100_novel07,MD05G1187100_novel22,MD05G1187100_novel14,MD05G1187100_novel19,MD05G1187100_novel23,MD05G1187100_novel08,MD05G1187100_novel09,MD05G1187100_novel10,MD05G1187100_novel15,MD05G118…
Chr05	MD05G1187100	+	A3	31525368-31525371	MD05G1187100_novel02	MD05G1187100,MD05G1187100_novel01,MD05G1187100_novel04,MD05G1187100_novel18,MD05G1187100_novel16,MD05G1187100_novel20,MD05G1187100_novel05,MD05G1187100_novel21,MD05G1187100_novel06,MD05G1187100_novel03,MD05G1187100_novel07,MD05G1187100_novel22,MD05G1187100_novel14,MD05G1187100_novel19,MD05G1187100_novel23,MD05G1187100_novel09,MD05G1187100_novel10,MD05G1187100_novel15,MD05G1187100_novel11,MD05G118…
Chr05	MD05G1187100	+	A3	31526339-31526351	MD05G1187100_novel04	MD05G1187100,MD05G1187100_novel02,MD05G1187100_novel18,MD05G1187100_novel16,MD05G1187100_novel20,MD05G1187100_novel05,MD05G1187100_novel06,MD05G1187100_novel03,MD05G1187100_novel07,MD05G1187100_novel22,MD05G1187100_novel14,MD05G1187100_novel19,MD05G1187100_novel23,MD05G1187100_novel08,MD05G1187100_novel09,MD05G1187100_novel10,MD05G1187100_novel15,MD05G1187100_novel11,MD05G1187100_novel12,MD05G118…
Chr05	MD05G1187600	+	A3	31573149-31573151	MD05G1187600	MD05G1187600_novel03,MD05G1187600
Chr05	MD05G1187900	+	A3	31600024-31600054	MD05G1187900,MD05G1187900_novel02,MD05G1187900_novel01,MD05G1187900_novel04,MD05G1187900_novel05	MD05G1187900_novel03,MD05G1187900_novel02,MD05G1187900_novel04,MD05G1187900_novel01,MD05G1187900_novel05,MD05G1187900
Chr05	MD05G1187900	+	A3	31600401-31600447	MD05G1187900_novel06,MD05G1187900_novel04,MD05G1187900_novel05	MD05G1187900_novel03,MD05G1187900,MD05G1187900_novel04,MD05G1187900_novel05,MD05G1187900_novel06
Chr05	MD05G1189200	-	A3	31710369-31709775	MD05G1189200,MD05G1189200_novel04,MD05G1189200_novel02,MD05G1189200_novel01	MD05G1189200_novel03,MD05G1189200,MD05G1189200_novel01,MD05G1189200_novel02,MD05G1189200_novel04
Chr05	MD05G1189200	-	A3	31712779-31712751	MD05G1189200_novel02	MD05G1189200,MD05G1189200_novel01,MD05G1189200_novel03,MD05G1189200_novel04,MD05G1189200_novel02
Chr05	MD05G1189400	+	A3	31835124-31835136	MD05G1189400_novel03	MD05G1189400_novel04,MD05G1189400_novel02,MD05G1189400_novel01,MD05G1189400,MD05G1189400_novel03
Chr05	MD05G1190100	+	A3	31900897-31900973	MD05G1190100_novel02	MD05G1190100,MD05G1190100_novel01,MD05G1190100_novel02
Chr05	MD05G1192400	+	A3	32054090-32054093	MD05G1192400	MD05G1192400_novel01,MD05G1192400_novel02,MD05G1192400_novel03,MD05G1192400_novel04,MD05G1192400
Chr05	MD05G1192400	+	A3	32055953-32056037	MD05G1192400_novel01,MD05G1192400,MD05G1192400_novel03	MD05G1192400_novel02,MD05G1192400_novel04,MD05G1192400,MD05G1192400_novel01,MD05G1192400_novel03
Chr05	MD05G1192400	+	A3	32057751-32057761	MD05G1192400_novel04,MD05G1192400_novel03,MD05G1192400_novel02	MD05G1192400,MD05G1192400_novel01,MD05G1192400_novel02,MD05G1192400_novel03,MD05G1192400_novel04
Chr05	MD05G1193400	-	A3	32118233-32118200	MD05G1193400_novel02	MD05G1193400,MD05G1193400_novel02
Chr05	MD05G1194200	+	A3	32190625-32190636	MD05G1194200	MD05G1194200_novel02,MD05G1194200
Chr05	MD05G1194200	+	A3	32191150-32191281	MD05G1194200,MD05G1194200_novel02	MD05G1194200_novel01,MD05G1194200,MD05G1194200_novel02
Chr05	MD05G1195200	+	A3	32243686-32243713	MD05G1195200_novel03,MD05G1195200	MD05G1195200_novel01,MD05G1195200_novel02,MD05G1195200_novel03,MD05G1195200
Chr05	MD05G1196200	-	A3	32353465-32353426	MD05G1196200_novel01	MD05G1196200,MD05G1196200_novel01
Chr05	MD05G1197100	+	A3	32443122-32443168	MD05G1197100,MD05G1197100_novel03,MD05G1197100_novel01	MD05G1197100_novel02,MD05G1197100,MD05G1197100_novel01,MD05G1197100_novel03
Chr05	MD05G1197700	-	A3	32470274-32470253	MD05G1197700	MD05G1197700_novel03,MD05G1197700
Chr05	MD05G1200600	+	A3	32777149-32777164	MD05G1200600_novel01,MD05G1200600_novel03,MD05G1200600_novel02,MD05G1200600_novel05,MD05G1200600	MD05G1200600_novel04,MD05G1200600_novel01,MD05G1200600_novel02,MD05G1200600_novel05,MD05G1200600_novel03,MD05G1200600
Chr05	MD05G1200600	+	A3	32777971-32777992	MD05G1200600	MD05G1200600_novel05,MD05G1200600_novel04,MD05G1200600_novel03,MD05G1200600
Chr05	MD05G1202600	+	A3	33192539-33192541	MD05G1202600	MD05G1202600_novel01,MD05G1202600_novel02,MD05G1202600
Chr05	MD05G1202600	+	A3	33194276-33194298	MD05G1202600_novel02,MD05G1202600_novel01	MD05G1202600,MD05G1202600_novel01,MD05G1202600_novel02
Chr05	MD05G1204900	+	A3	33447370-33447380	MD05G1204900_novel01	MD05G1204900,MD05G1204900_novel02,MD05G1204900_novel01
Chr05	MD05G1205200	+	A3	33458269-33458295	MD05G1205200,MD05G1205200_novel01	MD05G1205200_novel02,MD05G1205200_novel01,MD05G1205200
Chr05	MD05G1206400	+	A3	33543909-33543972	MD05G1206400_novel02	MD05G1206400,MD05G1206400_novel01,MD05G1206400_novel08,MD05G1206400_novel10,MD05G1206400_novel03,MD05G1206400_novel04,MD05G1206400_novel09,MD05G1206400_novel11,MD05G1206400_novel06,MD05G1206400_novel07,MD05G1206400_novel05,MD05G1206400_novel12,MD05G1206400_novel02
Chr05	MD05G1206400	+	A3	33545157-33545187	MD05G1206400_novel03,MD05G1206400_novel02,MD05G1206400_novel07,MD05G1206400_novel11,MD05G1206400_novel09,MD05G1206400_novel05,MD05G1206400	MD05G1206400_novel01,MD05G1206400_novel04,MD05G1206400_novel12,MD05G1206400_novel13,MD05G1206400,MD05G1206400_novel02,MD05G1206400_novel03,MD05G1206400_novel09,MD05G1206400_novel11,MD05G1206400_novel07,MD05G1206400_novel05
Chr05	MD05G1207000	+	A3	33635625-33635645	MD05G1207000,MD05G1207000_novel01,MD05G1207000_novel04,MD05G1207000_novel05	MD05G1207000_novel03,MD05G1207000,MD05G1207000_novel05,MD05G1207000_novel04,MD05G1207000_novel01
Chr05	MD05G1208500	+	A3	34018953-34019186	MD05G1208500_novel05	MD05G1208500,MD05G1208500_novel01,MD05G1208500_novel04,MD05G1208500_novel08,MD05G1208500_novel09,MD05G1208500_novel02,MD05G1208500_novel03,MD05G1208500_novel06,MD05G1208500_novel05
Chr05	MD05G1208500	+	A3	34020557-34020581	MD05G1208500_novel08	MD05G1208500,MD05G1208500_novel01,MD05G1208500_novel04,MD05G1208500_novel07,MD05G1208500_novel05,MD05G1208500_novel03,MD05G1208500_novel06,MD05G1208500_novel10,MD05G1208500_novel08
Chr05	MD05G1208800	-	A3	34076123-34076118	MD05G1208800	MD05G1208800_novel01,MD05G1208800
Chr05	MD05G1209100	-	A3	34088120-34088117	MD05G1209100_novel01	MD05G1209100,MD05G1209100_novel02,MD05G1209100_novel01
Chr05	MD05G1212000	-	A3	34335755-34335751	MD05G1212000_novel01,MD05G1212000_novel02,MD05G1212000_novel03	MD05G1212000,MD05G1212000_novel01,MD05G1212000_novel02,MD05G1212000_novel03
Chr05	MD05G1212000	-	A3	34336176-34336171	MD05G1212000_novel02	MD05G1212000_novel01,MD05G1212000_novel03,MD05G1212000_novel02
Chr05	MD05G1213800	+	A3	34517061-34517065	MD05G1213800_novel04	MD05G1213800_novel03,MD05G1213800_novel02,MD05G1213800_novel04
Chr05	MD05G1213800	+	A3	34517061-34517805	MD05G1213800_novel01,MD05G1213800	MD05G1213800_novel02,MD05G1213800,MD05G1213800_novel01
Chr05	MD05G1215600	-	A3	34656619-34656608	MD05G1215600_novel01	MD05G1215600_novel04,MD05G1215600_novel01
Chr05	MD05G1215600	-	A3	34656701-34656608	MD05G1215600_novel01	MD05G1215600_novel03,MD05G1215600_novel01
Chr05	MD05G1215600	-	A3	34656701-34656619	MD05G1215600_novel04	MD05G1215600_novel03,MD05G1215600_novel04
Chr05	MD05G1215600	-	A3	34656761-34656608	MD05G1215600_novel01	MD05G1215600_novel02,MD05G1215600_novel01
Chr05	MD05G1215600	-	A3	34656761-34656619	MD05G1215600_novel04	MD05G1215600_novel02,MD05G1215600_novel04
Chr05	MD05G1215600	-	A3	34656761-34656701	MD05G1215600_novel03	MD05G1215600_novel02,MD05G1215600_novel03
Chr05	MD05G1219300	+	A3	34972714-34973166	MD05G1219300_novel06	MD05G1219300,MD05G1219300_novel02,MD05G1219300_novel03,MD05G1219300_novel06
Chr05	MD05G1219300	+	A3	34976552-34976606	MD05G1219300_novel01,MD05G1219300_novel07	MD05G1219300_novel03,MD05G1219300_novel01,MD05G1219300_novel07
Chr05	MD05G1219300	+	A3	34977815-34977818	MD05G1219300	MD05G1219300_novel01,MD05G1219300_novel03,MD05G1219300_novel06,MD05G1219300_novel07,MD05G1219300
Chr05	MD05G1221200	-	A3	35405283-35405279	MD05G1221200_novel04,MD05G1221200_novel05,MD05G1221200_novel07,MD05G1221200_novel10	MD05G1221200_novel03,MD05G1221200_novel09,MD05G1221200,MD05G1221200_novel12,MD05G1221200_novel06,MD05G1221200_novel11,MD05G1221200_novel01,MD05G1221200_novel13,MD05G1221200_novel02,MD05G1221200_novel04,MD05G1221200_novel05,MD05G1221200_novel10,MD05G1221200_novel07
Chr05	MD05G1221200	-	A3	35406445-35406433	MD05G1221200_novel07	MD05G1221200_novel03,MD05G1221200_novel04,MD05G1221200_novel09,MD05G1221200_novel05,MD05G1221200,MD05G1221200_novel12,MD05G1221200_novel06,MD05G1221200_novel10,MD05G1221200_novel11,MD05G1221200_novel01,MD05G1221200_novel13,MD05G1221200_novel02,MD05G1221200_novel08,MD05G1221200_novel07
Chr05	MD05G1221200	-	A3	35408197-35408180	MD05G1221200_novel07	MD05G1221200_novel09,MD05G1221200_novel05,MD05G1221200_novel12,MD05G1221200_novel06,MD05G1221200_novel10,MD05G1221200_novel13,MD05G1221200_novel08,MD05G1221200_novel07
Chr05	MD05G1222400	+	A3	35494899-35494915	MD05G1222400_novel02,MD05G1222400_novel01	MD05G1222400,MD05G1222400_novel01,MD05G1222400_novel02
Chr05	MD05G1222500	-	A3	35505919-35505839	MD05G1222500_novel02	MD05G1222500,MD05G1222500_novel01,MD05G1222500_novel02
Chr05	MD05G1222600	-	A3	35520070-35520056	MD05G1222600,MD05G1222600_novel09,MD05G1222600_novel08,MD05G1222600_novel05,MD05G1222600_novel07,MD05G1222600_novel06,MD05G1222600_novel01,MD05G1222600_novel03	MD05G1222600_novel02,MD05G1222600,MD05G1222600_novel01,MD05G1222600_novel03,MD05G1222600_novel08,MD05G1222600_novel09,MD05G1222600_novel05,MD05G1222600_novel07,MD05G1222600_novel06
Chr05	MD05G1225000	-	A3	35759126-35759106	MD05G1225000_novel05,MD05G1225000_novel02,MD05G1225000_novel03,MD05G1225000	MD05G1225000_novel04,MD05G1225000_novel01,MD05G1225000,MD05G1225000_novel03,MD05G1225000_novel05,MD05G1225000_novel02
Chr05	MD05G1225000	-	A3	35761803-35761692	MD05G1225000_novel03,MD05G1225000_novel02,MD05G1225000_novel01	MD05G1225000,MD05G1225000_novel03,MD05G1225000_novel01,MD05G1225000_novel02
Chr05	MD05G1233900	-	A3	36636867-36636864	MD05G1233900_novel01	MD05G1233900,MD05G1233900_novel01
Chr05	MD05G1234200	+	A3	36650294-36650326	MD05G1234200	MD05G1234200_novel02,MD05G1234200_novel01,MD05G1234200
Chr05	MD05G1234400	+	A3	36671764-36671773	MD05G1234400_novel01	MD05G1234400,MD05G1234400_novel01
Chr05	MD05G1235200	-	A3	36723593-36723586	MD05G1235200_novel01	MD05G1235200,MD05G1235200_novel01
Chr05	MD05G1235200	-	A3	36724391-36724336	MD05G1235200_novel01	MD05G1235200,MD05G1235200_novel01
Chr05	MD05G1236200	-	A3	36767559-36767548	MD05G1236200_novel07	MD05G1236200_novel05,MD05G1236200_novel06,MD05G1236200_novel08,MD05G1236200_novel03,MD05G1236200_novel02,MD05G1236200_novel04,MD05G1236200_novel01,MD05G1236200,MD05G1236200_novel07
Chr05	MD05G1238300	+	A3	36946485-36946512	MD05G1238300_novel01,MD05G1238300	MD05G1238300_novel02,MD05G1238300,MD05G1238300_novel01
Chr05	MD05G1238300	+	A3	36949923-36950516	MD05G1238300_novel02,MD05G1238300	MD05G1238300_novel01,MD05G1238300,MD05G1238300_novel02
Chr05	MD05G1240700	-	A3	37140757-37140714	MD05G1240700_novel03	MD05G1240700,MD05G1240700_novel01,MD05G1240700_novel03
Chr05	MD05G1241100	+	A3	37169856-37169866	MD05G1241100_novel01,MD05G1241100_novel02,MD05G1241100	MD05G1241100_novel03,MD05G1241100,MD05G1241100_novel01,MD05G1241100_novel02
Chr05	MD05G1243800	-	A3	37643886-37643883	MD05G1243800_novel01	MD05G1243800,MD05G1243800_novel01
Chr05	MD05G1243800	-	A3	37646216-37646207	MD05G1243800	MD05G1243800_novel01,MD05G1243800
Chr05	MD05G1245400	-	A3	37738433-37738419	MD05G1245400,MD05G1245400_novel02	MD05G1245400_novel01,MD05G1245400_novel02,MD05G1245400
Chr05	MD05G1248300	+	A3	37980051-37980054	MD05G1248300_novel01	MD05G1248300,MD05G1248300_novel01
Chr05	MD05G1249100	-	A3	38074026-38073911	MD05G1249100,MD05G1249100_novel03	MD05G1249100_novel01,MD05G1249100_novel05,MD05G1249100_novel04,MD05G1249100,MD05G1249100_novel03
Chr05	MD05G1249500	+	A3	38115613-38115645	MD05G1249500_novel08	MD05G1249500,MD05G1249500_novel01,MD05G1249500_novel02,MD05G1249500_novel03,MD05G1249500_novel05,MD05G1249500_novel06,MD05G1249500_novel04,MD05G1249500_novel07,MD05G1249500_novel09,MD05G1249500_novel10,MD05G1249500_novel11,MD05G1249500_novel08
Chr05	MD05G1249500	+	A3	38116037-38116142	MD05G1249500,MD05G1249500_novel10,MD05G1249500_novel11,MD05G1249500_novel08,MD05G1249500_novel05,MD05G1249500_novel04,MD05G1249500_novel07,MD05G1249500_novel06,MD05G1249500_novel01	MD05G1249500_novel03,MD05G1249500,MD05G1249500_novel01,MD05G1249500_novel05,MD05G1249500_novel06,MD05G1249500_novel04,MD05G1249500_novel07,MD05G1249500_novel08,MD05G1249500_novel10,MD05G1249500_novel11
Chr05	MD05G1249600	+	A3	38118210-38118220	MD05G1249600_novel04,MD05G1249600_novel02	MD05G1249600_novel01,MD05G1249600_novel03,MD05G1249600,MD05G1249600_novel02,MD05G1249600_novel04
Chr05	MD05G1249600	+	A3	38119091-38119137	MD05G1249600_novel01	MD05G1249600_novel02,MD05G1249600_novel03,MD05G1249600,MD05G1249600_novel04,MD05G1249600_novel01
Chr05	MD05G1249700	-	A3	38127309-38127306	MD05G1249700	MD05G1249700_novel02,MD05G1249700_novel03,MD05G1249700_novel01,MD05G1249700_novel04,MD05G1249700
Chr05	MD05G1249800	-	A3	38136109-38135870	MD05G1249800_novel02	MD05G1249800,MD05G1249800_novel02
Chr05	MD05G1250500	-	A3	38273772-38273764	MD05G1250500_novel02	MD05G1250500,MD05G1250500_novel03,MD05G1250500_novel01,MD05G1250500_novel02
Chr05	MD05G1250900	+	A3	38298629-38298641	MD05G1250900_novel01	MD05G1250900,MD05G1250900_novel01
Chr05	MD05G1250900	+	A3	38298629-38298895	MD05G1250900_novel02	MD05G1250900,MD05G1250900_novel02
Chr05	MD05G1250900	+	A3	38298641-38298895	MD05G1250900_novel02	MD05G1250900_novel01,MD05G1250900_novel02
Chr05	MD05G1251900	+	A3	38361592-38361626	MD05G1251900_novel01	MD05G1251900,MD05G1251900_novel01
Chr05	MD05G1252600	+	A3	38398120-38398162	MD05G1252600,MD05G1252600_novel04,MD05G1252600_novel02,MD05G1252600_novel01	MD05G1252600_novel03,MD05G1252600,MD05G1252600_novel01,MD05G1252600_novel02,MD05G1252600_novel04
Chr05	MD05G1252800	+	A3	38422076-38422156	MD05G1252800,MD05G1252800_novel01,MD05G1252800_novel03	MD05G1252800_novel02,MD05G1252800_novel01,MD05G1252800,MD05G1252800_novel03
Chr05	MD05G1255900	+	A3	38663785-38663999	MD05G1255900_novel02	MD05G1255900_novel01,MD05G1255900_novel02
Chr05	MD05G1255900	+	A3	38663604-38663754	MD05G1255900	MD05G1255900_novel05,MD05G1255900
Chr05	MD05G1255900	+	A3	38663604-38663785	MD05G1255900_novel04	MD05G1255900_novel05,MD05G1255900_novel04
Chr05	MD05G1255900	+	A3	38663604-38663994	MD05G1255900_novel03	MD05G1255900_novel05,MD05G1255900_novel03
Chr05	MD05G1255900	+	A3	38663754-38663785	MD05G1255900_novel04	MD05G1255900,MD05G1255900_novel04
Chr05	MD05G1255900	+	A3	38663754-38663994	MD05G1255900_novel03	MD05G1255900,MD05G1255900_novel03
Chr05	MD05G1255900	+	A3	38663785-38663994	MD05G1255900_novel03	MD05G1255900_novel04,MD05G1255900_novel03
Chr05	MD05G1257400	+	A3	39372745-39372790	MD05G1257400_novel01	MD05G1257400,MD05G1257400_novel01
Chr05	MD05G1257400	+	A3	39374399-39374438	MD05G1257400	MD05G1257400_novel01,MD05G1257400
Chr05	MD05G1259300	-	A3	39500440-39500433	MD05G1259300,MD05G1259300_novel01	MD05G1259300_novel02,MD05G1259300_novel01,MD05G1259300
Chr05	MD05G1261800	-	A3	39706433-39706367	MD05G1261800_novel01	MD05G1261800,MD05G1261800_novel01
Chr05	MD05G1271000	-	A3	40675338-40675285	MD05G1271000_novel02	MD05G1271000_novel01,MD05G1271000_novel02
Chr05	MD05G1271100	-	A3	40681069-40681049	MD05G1271100_novel03,MD05G1271100_novel05	MD05G1271100_novel04,MD05G1271100_novel03,MD05G1271100_novel05
Chr05	MD05G1271100	-	A3	40681073-40681049	MD05G1271100_novel03,MD05G1271100_novel05	MD05G1271100_novel01,MD05G1271100_novel03,MD05G1271100_novel05
Chr05	MD05G1271100	-	A3	40681073-40681069	MD05G1271100_novel04	MD05G1271100_novel01,MD05G1271100_novel04
Chr05	MD05G1271100	-	A3	40681090-40681049	MD05G1271100_novel03,MD05G1271100_novel05	MD05G1271100,MD05G1271100_novel03,MD05G1271100_novel05
Chr05	MD05G1271100	-	A3	40681090-40681069	MD05G1271100_novel04	MD05G1271100,MD05G1271100_novel04
Chr05	MD05G1271100	-	A3	40681090-40681073	MD05G1271100_novel01	MD05G1271100,MD05G1271100_novel01
Chr05	MD05G1271100	-	A3	40681105-40681049	MD05G1271100_novel03,MD05G1271100_novel05	MD05G1271100_novel02,MD05G1271100_novel03,MD05G1271100_novel05
Chr05	MD05G1271100	-	A3	40681105-40681069	MD05G1271100_novel04	MD05G1271100_novel02,MD05G1271100_novel04
Chr05	MD05G1271100	-	A3	40681105-40681073	MD05G1271100_novel01	MD05G1271100_novel02,MD05G1271100_novel01
Chr05	MD05G1271100	-	A3	40681105-40681090	MD05G1271100	MD05G1271100_novel02,MD05G1271100
Chr05	MD05G1273000	-	A3	40802471-40802468	MD05G1273000	MD05G1273000_novel01,MD05G1273000
Chr05	MD05G1273000	-	A3	40805552-40805538	MD05G1273000	MD05G1273000_novel01,MD05G1273000
Chr05	MD05G1274200	+	A3	40897740-40897793	MD05G1274200,MD05G1274200_novel06,MD05G1274200_novel07,MD05G1274200_novel05,MD05G1274200_novel02,MD05G1274200_novel03	MD05G1274200_novel01,MD05G1274200,MD05G1274200_novel03,MD05G1274200_novel05,MD05G1274200_novel06,MD05G1274200_novel02,MD05G1274200_novel07
Chr05	MD05G1279200	+	A3	41349928-41349954	MD05G1279200_novel02	MD05G1279200_novel01,MD05G1279200,MD05G1279200_novel04,MD05G1279200_novel05,MD05G1279200_novel06,MD05G1279200_novel02
Chr05	MD05G1279300	-	A3	41354997-41354984	MD05G1279300,MD05G1279300_novel02,MD05G1279300_novel03	MD05G1279300_novel01,MD05G1279300_novel03,MD05G1279300,MD05G1279300_novel02
Chr05	MD05G1279500	-	A3	41370693-41370688	MD05G1279500	MD05G1279500_novel02,MD05G1279500_novel01,MD05G1279500
Chr05	MD05G1279900	+	A3	41401210-41401231	MD05G1279900_novel01	MD05G1279900_novel02,MD05G1279900,MD05G1279900_novel01
Chr05	MD05G1281100	+	A3	41509943-41509978	MD05G1281100	MD05G1281100_novel01,MD05G1281100
Chr05	MD05G1281900	+	A3	41572009-41572013	MD05G1281900_novel02	MD05G1281900,MD05G1281900_novel02
Chr05	MD05G1281900	+	A3	41572009-41572029	MD05G1281900_novel05,MD05G1281900_novel04,MD05G1281900_novel01,MD05G1281900_novel03	MD05G1281900,MD05G1281900_novel01,MD05G1281900_novel05,MD05G1281900_novel03,MD05G1281900_novel04
Chr05	MD05G1281900	+	A3	41572013-41572029	MD05G1281900_novel05,MD05G1281900_novel04,MD05G1281900_novel01,MD05G1281900_novel03	MD05G1281900_novel02,MD05G1281900_novel01,MD05G1281900_novel05,MD05G1281900_novel03,MD05G1281900_novel04
Chr05	MD05G1281900	+	A3	41573278-41573288	MD05G1281900_novel04	MD05G1281900_novel01,MD05G1281900,MD05G1281900_novel02,MD05G1281900_novel05,MD05G1281900_novel03,MD05G1281900_novel06,MD05G1281900_novel07,MD05G1281900_novel08,MD05G1281900_novel04
Chr05	MD05G1282900	+	A3	41654516-41654560	MD05G1282900_novel06,MD05G1282900_novel03	MD05G1282900_novel04,MD05G1282900_novel03,MD05G1282900_novel06
Chr05	MD05G1282900	+	A3	41654516-41654563	MD05G1282900_novel01	MD05G1282900_novel04,MD05G1282900_novel01
Chr05	MD05G1282900	+	A3	41654560-41654563	MD05G1282900_novel01	MD05G1282900_novel03,MD05G1282900_novel06,MD05G1282900_novel01
Chr05	MD05G1283200	-	A3	41667934-41667913	MD05G1283200_novel02,MD05G1283200_novel03,MD05G1283200	MD05G1283200_novel01,MD05G1283200,MD05G1283200_novel03,MD05G1283200_novel02
Chr05	MD05G1283700	-	A3	41733176-41733169	MD05G1283700_novel01,MD05G1283700	MD05G1283700_novel02,MD05G1283700,MD05G1283700_novel01
Chr05	MD05G1283700	-	A3	41743406-41743379	MD05G1283700,MD05G1283700_novel02	MD05G1283700_novel01,MD05G1283700,MD05G1283700_novel02
Chr05	MD05G1284700	+	A3	41866140-41866146	MD05G1284700_novel01	MD05G1284700,MD05G1284700_novel01
Chr05	MD05G1284700	+	A3	41866140-41866155	MD05G1284700_novel02	MD05G1284700,MD05G1284700_novel02
Chr05	MD05G1284700	+	A3	41866146-41866155	MD05G1284700_novel02	MD05G1284700_novel01,MD05G1284700_novel02
Chr05	MD05G1290900	-	A3	42247620-42247617	MD05G1290900	MD05G1290900_novel02,MD05G1290900_novel01,MD05G1290900_novel03,MD05G1290900_novel04,MD05G1290900
Chr05	MD05G1290900	-	A3	42249271-42249170	MD05G1290900_novel01	MD05G1290900,MD05G1290900_novel01
Chr05	MD05G1291100	+	A3	42274718-42274927	MD05G1291100_novel05,MD05G1291100,MD05G1291100_novel07,MD05G1291100_novel03	MD05G1291100_novel02,MD05G1291100_novel03,MD05G1291100,MD05G1291100_novel05,MD05G1291100_novel07
Chr05	MD05G1291100	+	A3	42274718-42274936	MD05G1291100_novel04,MD05G1291100_novel06	MD05G1291100_novel02,MD05G1291100_novel04,MD05G1291100_novel06
Chr05	MD05G1291100	+	A3	42274718-42275371	MD05G1291100_novel01	MD05G1291100_novel02,MD05G1291100_novel01
Chr05	MD05G1291100	+	A3	42274927-42274936	MD05G1291100_novel04,MD05G1291100_novel06	MD05G1291100_novel03,MD05G1291100,MD05G1291100_novel05,MD05G1291100_novel07,MD05G1291100_novel04,MD05G1291100_novel06
Chr05	MD05G1291100	+	A3	42275147-42275272	MD05G1291100_novel07,MD05G1291100_novel03	MD05G1291100_novel05,MD05G1291100_novel03,MD05G1291100_novel07
Chr05	MD05G1291100	+	A3	42275147-42275321	MD05G1291100_novel06,MD05G1291100	MD05G1291100_novel05,MD05G1291100,MD05G1291100_novel06
Chr05	MD05G1291100	+	A3	42275147-42275371	MD05G1291100_novel04	MD05G1291100_novel05,MD05G1291100_novel04
Chr05	MD05G1291100	+	A3	42275272-42275321	MD05G1291100_novel06,MD05G1291100	MD05G1291100_novel03,MD05G1291100_novel07,MD05G1291100,MD05G1291100_novel06
Chr05	MD05G1291100	+	A3	42275272-42275371	MD05G1291100_novel04	MD05G1291100_novel03,MD05G1291100_novel07,MD05G1291100_novel04
Chr05	MD05G1291100	+	A3	42275321-42275371	MD05G1291100_novel04	MD05G1291100,MD05G1291100_novel06,MD05G1291100_novel04
Chr05	MD05G1291100	+	A3	42278501-42278533	MD05G1291100_novel01	MD05G1291100_novel03,MD05G1291100,MD05G1291100_novel02,MD05G1291100_novel04,MD05G1291100_novel05,MD05G1291100_novel06,MD05G1291100_novel07,MD05G1291100_novel08,MD05G1291100_novel01
Chr05	MD05G1291700	-	A3	42319932-42319910	MD05G1291700_novel10,MD05G1291700_novel04,MD05G1291700_novel02,MD05G1291700_novel03,MD05G1291700_novel01,MD05G1291700,MD05G1291700_novel08,MD05G1291700_novel09,MD05G1291700_novel07	MD05G1291700_novel05,MD05G1291700_novel08,MD05G1291700,MD05G1291700_novel09,MD05G1291700_novel01,MD05G1291700_novel10,MD05G1291700_novel07,MD05G1291700_novel03,MD05G1291700_novel02,MD05G1291700_novel04
Chr05	MD05G1291700	-	A3	42320917-42320655	MD05G1291700_novel03	MD05G1291700_novel01,MD05G1291700_novel02,MD05G1291700_novel03
Chr05	MD05G1291700	-	A3	42320917-42320873	MD05G1291700_novel04	MD05G1291700_novel08,MD05G1291700,MD05G1291700_novel05,MD05G1291700_novel01,MD05G1291700_novel07,MD05G1291700_novel02,MD05G1291700_novel04
Chr05	MD05G1292900	-	A3	42439033-42438738	MD05G1292900_novel04	MD05G1292900_novel03,MD05G1292900_novel04
Chr05	MD05G1293800	-	A3	42649272-42649262	MD05G1293800_novel02	MD05G1293800_novel01,MD05G1293800,MD05G1293800_novel02
Chr05	MD05G1296500	+	A3	43089194-43089235	MD05G1296500	MD05G1296500_novel01,MD05G1296500
Chr05	MD05G1296700	-	A3	43101209-43101179	MD05G1296700_novel02	MD05G1296700_novel10,MD05G1296700,MD05G1296700_novel01,MD05G1296700_novel03,MD05G1296700_novel04,MD05G1296700_novel05,MD05G1296700_novel08,MD05G1296700_novel06,MD05G1296700_novel07,MD05G1296700_novel09,MD05G1296700_novel02
Chr05	MD05G1296700	-	A3	43101561-43101555	MD05G1296700_novel02,MD05G1296700,MD05G1296700_novel05	MD05G1296700_novel03,MD05G1296700_novel04,MD05G1296700,MD05G1296700_novel02,MD05G1296700_novel05
Chr05	MD05G1296700	-	A3	43101887-43101561	MD05G1296700_novel10,MD05G1296700_novel07	MD05G1296700_novel06,MD05G1296700_novel10,MD05G1296700_novel07
Chr05	MD05G1296700	-	A3	43102008-43101887	MD05G1296700_novel03,MD05G1296700_novel02,MD05G1296700_novel06,MD05G1296700_novel05	MD05G1296700_novel04,MD05G1296700_novel02,MD05G1296700_novel03,MD05G1296700_novel05,MD05G1296700_novel06
Chr05	MD05G1299600	-	A3	43309158-43309155	MD05G1299600	MD05G1299600_novel01,MD05G1299600
Chr05	MD05G1300800	-	A3	43377301-43377289	MD05G1300800	MD05G1300800_novel01,MD05G1300800
Chr05	MD05G1301200	-	A3	43419824-43419803	MD05G1301200_novel01,MD05G1301200_novel02	MD05G1301200,MD05G1301200_novel02,MD05G1301200_novel01
Chr05	MD05G1302300	-	A3	43477778-43477758	MD05G1302300_novel01,MD05G1302300_novel02	MD05G1302300,MD05G1302300_novel03,MD05G1302300_novel02,MD05G1302300_novel01
Chr05	MD05G1305600	-	A3	43782106-43782099	MD05G1305600_novel02	MD05G1305600,MD05G1305600_novel04,MD05G1305600_novel05,MD05G1305600_novel01,MD05G1305600_novel06,MD05G1305600_novel02
Chr05	MD05G1305600	-	A3	43790230-43790225	MD05G1305600_novel05,MD05G1305600_novel02	MD05G1305600_novel04,MD05G1305600_novel03,MD05G1305600_novel01,MD05G1305600_novel06,MD05G1305600_novel05,MD05G1305600_novel02
Chr05	MD05G1306400	-	A3	43850961-43850913	MD05G1306400_novel01	MD05G1306400,MD05G1306400_novel01
Chr05	MD05G1308100	-	A3	43937858-43937806	MD05G1308100	MD05G1308100_novel01,MD05G1308100_novel02,MD05G1308100_novel05,MD05G1308100_novel04,MD05G1308100
Chr05	MD05G1308100	-	A3	43937875-43937806	MD05G1308100	MD05G1308100_novel03,MD05G1308100
Chr05	MD05G1308100	-	A3	43937875-43937858	MD05G1308100_novel05,MD05G1308100_novel04,MD05G1308100_novel01,MD05G1308100_novel02	MD05G1308100_novel03,MD05G1308100_novel01,MD05G1308100_novel02,MD05G1308100_novel05,MD05G1308100_novel04
Chr05	MD05G1308300	-	A3	43943789-43943751	MD05G1308300,MD05G1308300_novel02,MD05G1308300_novel01,MD05G1308300_novel07,MD05G1308300_novel05	MD05G1308300_novel06,MD05G1308300_novel04,MD05G1308300_novel03,MD05G1308300_novel01,MD05G1308300,MD05G1308300_novel02,MD05G1308300_novel05,MD05G1308300_novel07
Chr05	MD05G1309600	+	A3	44024650-44024661	MD05G1309600_novel02	MD05G1309600,MD05G1309600_novel01,MD05G1309600_novel03,MD05G1309600_novel02
Chr05	MD05G1309700	-	A3	44033091-44033087	MD05G1309700_novel01	MD05G1309700,MD05G1309700_novel01
Chr05	MD05G1310200	+	A3	44091724-44091727	MD05G1310200_novel03,MD05G1310200_novel02,MD05G1310200_novel01	MD05G1310200,MD05G1310200_novel01,MD05G1310200_novel02,MD05G1310200_novel03
Chr05	MD05G1311300	-	A3	44131407-44131372	MD05G1311300_novel01	MD05G1311300,MD05G1311300_novel01
Chr05	MD05G1311500	+	A3	44154007-44154027	MD05G1311500_novel01	MD05G1311500,MD05G1311500_novel01
Chr05	MD05G1312000	-	A3	44195246-44195244	MD05G1312000	MD05G1312000_novel01,MD05G1312000
Chr05	MD05G1312200	+	A3	44201907-44201912	MD05G1312200_novel01,MD05G1312200_novel02,MD05G1312200_novel03	MD05G1312200,MD05G1312200_novel04,MD05G1312200_novel01,MD05G1312200_novel02,MD05G1312200_novel03
Chr05	MD05G1312200	+	A3	44202067-44202086	MD05G1312200,MD05G1312200_novel03	MD05G1312200_novel01,MD05G1312200_novel04,MD05G1312200,MD05G1312200_novel03
Chr05	MD05G1312700	+	A3	44339179-44339195	MD05G1312700_novel08,MD05G1312700_novel03,MD05G1312700_novel01,MD05G1312700_novel02,MD05G1312700_novel10,MD05G1312700_novel04,MD05G1312700_novel05,MD05G1312700_novel06,MD05G1312700_novel07,MD05G1312700	MD05G1312700_novel09,MD05G1312700,MD05G1312700_novel01,MD05G1312700_novel03,MD05G1312700_novel02,MD05G1312700_novel05,MD05G1312700_novel06,MD05G1312700_novel04,MD05G1312700_novel07,MD05G1312700_novel08,MD05G1312700_novel10
Chr05	MD05G1314100	-	A3	44436379-44436376	MD05G1314100	MD05G1314100_novel01,MD05G1314100
Chr05	MD05G1315100	+	A3	44476709-44476712	MD05G1315100_novel03,MD05G1315100_novel10,MD05G1315100_novel07,MD05G1315100_novel06,MD05G1315100_novel05,MD05G1315100_novel02,MD05G1315100_novel09,MD05G1315100_novel08,MD05G1315100_novel11,MD05G1315100,MD05G1315100_novel04	MD05G1315100_novel01,MD05G1315100,MD05G1315100_novel03,MD05G1315100_novel06,MD05G1315100_novel10,MD05G1315100_novel02,MD05G1315100_novel04,MD05G1315100_novel09,MD05G1315100_novel05,MD05G1315100_novel11,MD05G1315100_novel08,MD05G1315100_novel07
Chr05	MD05G1315100	+	A3	44477546-44477596	MD05G1315100_novel07	MD05G1315100_novel03,MD05G1315100_novel07
Chr05	MD05G1315100	+	A3	44477546-44477722	MD05G1315100_novel02,MD05G1315100_novel01,MD05G1315100_novel05	MD05G1315100_novel03,MD05G1315100_novel01,MD05G1315100_novel02,MD05G1315100_novel05
Chr05	MD05G1315100	+	A3	44477546-44478059	MD05G1315100_novel04	MD05G1315100_novel03,MD05G1315100_novel04
Chr05	MD05G1315100	+	A3	44477546-44478071	MD05G1315100_novel09,MD05G1315100,MD05G1315100_novel06,MD05G1315100_novel12	MD05G1315100_novel03,MD05G1315100,MD05G1315100_novel06,MD05G1315100_novel09,MD05G1315100_novel12
Chr05	MD05G1315100	+	A3	44477596-44477722	MD05G1315100_novel02,MD05G1315100_novel01,MD05G1315100_novel05	MD05G1315100_novel07,MD05G1315100_novel01,MD05G1315100_novel02,MD05G1315100_novel05
Chr05	MD05G1315100	+	A3	44477596-44478059	MD05G1315100_novel04	MD05G1315100_novel07,MD05G1315100_novel04
Chr05	MD05G1315100	+	A3	44477596-44478071	MD05G1315100_novel09,MD05G1315100,MD05G1315100_novel06,MD05G1315100_novel12	MD05G1315100_novel07,MD05G1315100,MD05G1315100_novel06,MD05G1315100_novel09,MD05G1315100_novel12
Chr05	MD05G1315100	+	A3	44477722-44478059	MD05G1315100_novel04	MD05G1315100_novel05,MD05G1315100_novel04
Chr05	MD05G1315100	+	A3	44477722-44478071	MD05G1315100_novel12,MD05G1315100,MD05G1315100_novel09,MD05G1315100_novel06	MD05G1315100_novel05,MD05G1315100,MD05G1315100_novel06,MD05G1315100_novel09,MD05G1315100_novel12
Chr05	MD05G1315100	+	A3	44478059-44478071	MD05G1315100_novel09,MD05G1315100,MD05G1315100_novel06,MD05G1315100_novel12	MD05G1315100_novel04,MD05G1315100,MD05G1315100_novel06,MD05G1315100_novel09,MD05G1315100_novel12
Chr05	MD05G1315100	+	A3	44480505-44480520	MD05G1315100_novel06	MD05G1315100,MD05G1315100_novel01,MD05G1315100_novel03,MD05G1315100_novel02,MD05G1315100_novel04,MD05G1315100_novel05,MD05G1315100_novel11,MD05G1315100_novel08,MD05G1315100_novel07,MD05G1315100_novel12,MD05G1315100_novel06
Chr05	MD05G1316600	+	A3	44580966-44580978	MD05G1316600,MD05G1316600_novel01,MD05G1316600_novel03,MD05G1316600_novel04,MD05G1316600_novel07,MD05G1316600_novel06,MD05G1316600_novel08	MD05G1316600_novel02,MD05G1316600_novel01,MD05G1316600_novel03,MD05G1316600,MD05G1316600_novel04,MD05G1316600_novel06,MD05G1316600_novel07,MD05G1316600_novel08
Chr05	MD05G1318200	+	A3	44651553-44651898	MD05G1318200_novel02,MD05G1318200,MD05G1318200_novel04	MD05G1318200_novel01,MD05G1318200_novel02,MD05G1318200,MD05G1318200_novel04
Chr05	MD05G1318200	+	A3	44653320-44653323	MD05G1318200	MD05G1318200_novel01,MD05G1318200_novel02,MD05G1318200_novel03,MD05G1318200_novel04,MD05G1318200
Chr05	MD05G1321300	+	A3	44855073-44855075	MD05G1321300	MD05G1321300_novel01,MD05G1321300_novel02,MD05G1321300
Chr05	MD05G1322200	-	A3	44961392-44961389	MD05G1322200,MD05G1322200_novel02	MD05G1322200_novel04,MD05G1322200_novel01,MD05G1322200_novel03,MD05G1322200_novel05,MD05G1322200,MD05G1322200_novel02
Chr05	MD05G1322300	+	A3	44967116-44967119	MD05G1322300	MD05G1322300_novel02,MD05G1322300
Chr05	MD05G1322800	+	A3	45006094-45006099	MD05G1322800,MD05G1322800_novel01,MD05G1322800_novel03,MD05G1322800_novel04,MD05G1322800_novel06,MD05G1322800_novel07	MD05G1322800_novel02,MD05G1322800_novel01,MD05G1322800,MD05G1322800_novel03,MD05G1322800_novel04,MD05G1322800_novel06,MD05G1322800_novel07
Chr05	MD05G1323000	+	A3	45029969-45030003	MD05G1323000_novel03,MD05G1323000_novel02,MD05G1323000,MD05G1323000_novel05,MD05G1323000_novel04	MD05G1323000_novel01,MD05G1323000_novel02,MD05G1323000_novel03,MD05G1323000_novel04,MD05G1323000,MD05G1323000_novel05
Chr05	MD05G1323000	+	A3	45030714-45030724	MD05G1323000_novel02	MD05G1323000_novel01,MD05G1323000_novel03,MD05G1323000_novel04,MD05G1323000,MD05G1323000_novel05,MD05G1323000_novel02
Chr05	MD05G1324100	+	A3	45098428-45098456	MD05G1324100_novel07,MD05G1324100_novel06,MD05G1324100_novel05,MD05G1324100_novel04,MD05G1324100_novel03,MD05G1324100_novel02,MD05G1324100_novel01,MD05G1324100_novel13,MD05G1324100,MD05G1324100_novel08,MD05G1324100_novel12,MD05G1324100_novel10,MD05G1324100_novel11	MD05G1324100_novel09,MD05G1324100,MD05G1324100_novel01,MD05G1324100_novel03,MD05G1324100_novel02,MD05G1324100_novel04,MD05G1324100_novel07,MD05G1324100_novel05,MD05G1324100_novel10,MD05G1324100_novel08,MD05G1324100_novel11,MD05G1324100_novel06,MD05G1324100_novel12,MD05G1324100_novel13
Chr05	MD05G1324100	+	A3	45099253-45099256	MD05G1324100_novel01,MD05G1324100_novel13,MD05G1324100,MD05G1324100_novel08,MD05G1324100_novel12,MD05G1324100_novel10,MD05G1324100_novel11	MD05G1324100_novel03,MD05G1324100_novel02,MD05G1324100_novel04,MD05G1324100_novel07,MD05G1324100_novel09,MD05G1324100_novel05,MD05G1324100_novel06,MD05G1324100,MD05G1324100_novel01,MD05G1324100_novel10,MD05G1324100_novel08,MD05G1324100_novel11,MD05G1324100_novel12,MD05G1324100_novel13
Chr05	MD05G1324100	+	A3	45099538-45099543	MD05G1324100_novel04	MD05G1324100,MD05G1324100_novel01,MD05G1324100_novel03,MD05G1324100_novel02,MD05G1324100_novel07,MD05G1324100_novel09,MD05G1324100_novel05,MD05G1324100_novel10,MD05G1324100_novel08,MD05G1324100_novel11,MD05G1324100_novel06,MD05G1324100_novel12,MD05G1324100_novel13,MD05G1324100_novel04
Chr05	MD05G1325100	+	A3	45146901-45146904	MD05G1325100_novel02,MD05G1325100_novel03,MD05G1325100	MD05G1325100_novel01,MD05G1325100,MD05G1325100_novel02,MD05G1325100_novel03
Chr05	MD05G1325300	+	A3	45153231-45153304	MD05G1325300	MD05G1325300_novel01,MD05G1325300
Chr05	MD05G1326100	+	A3	45232414-45232439	MD05G1326100_novel03	MD05G1326100_novel02,MD05G1326100,MD05G1326100_novel03
Chr05	MD05G1327200	-	A3	45325455-45325430	MD05G1327200	MD05G1327200_novel01,MD05G1327200
Chr05	MD05G1329600	+	A3	45439185-45439583	MD05G1329600_novel01,MD05G1329600,MD05G1329600_novel05,MD05G1329600_novel04	MD05G1329600_novel03,MD05G1329600_novel06,MD05G1329600_novel02,MD05G1329600,MD05G1329600_novel01,MD05G1329600_novel04,MD05G1329600_novel05
Chr05	MD05G1329600	+	A3	45440376-45440382	MD05G1329600_novel05	MD05G1329600,MD05G1329600_novel06,MD05G1329600_novel05
Chr05	MD05G1340400	-	A3	46100569-46100506	MD05G1340400	MD05G1340400_novel01,MD05G1340400
Chr05	MD05G1340500	+	A3	46105669-46105674	MD05G1340500	MD05G1340500_novel01,MD05G1340500
Chr05	MD05G1340900	-	A3	46130252-46130218	MD05G1340900,MD05G1340900_novel02	MD05G1340900_novel01,MD05G1340900_novel02,MD05G1340900
Chr05	MD05G1342300	-	A3	46271527-46271517	MD05G1342300_novel01	MD05G1342300,MD05G1342300_novel01
Chr05	MD05G1342500	+	A3	46290800-46290803	MD05G1342500_novel02	MD05G1342500,MD05G1342500_novel01,MD05G1342500_novel02
Chr05	MD05G1343500	+	A3	46353555-46353789	MD05G1343500,MD05G1343500_novel02	MD05G1343500_novel03,MD05G1343500,MD05G1343500_novel02
Chr05	MD05G1343800	-	A3	46366103-46365949	MD05G1343800_novel02	MD05G1343800_novel01,MD05G1343800_novel02
Chr05	MD05G1343800	-	A3	46366151-46365949	MD05G1343800_novel02	MD05G1343800_novel03,MD05G1343800_novel02
Chr05	MD05G1343800	-	A3	46366151-46366103	MD05G1343800_novel01	MD05G1343800_novel03,MD05G1343800_novel01
Chr05	MD05G1345900	-	A3	46541354-46540522	MD05G1345900	MD05G1345900_novel01,MD05G1345900
Chr05	MD05G1347400	+	A3	46631197-46631217	MD05G1347400_novel05,MD05G1347400_novel04,MD05G1347400_novel01,MD05G1347400_novel02,MD05G1347400	MD05G1347400_novel03,MD05G1347400,MD05G1347400_novel01,MD05G1347400_novel02,MD05G1347400_novel04,MD05G1347400_novel05
Chr05	MD05G1348100	-	A3	46664161-46664102	MD05G1348100	MD05G1348100_novel01,MD05G1348100
Chr05	MD05G1348800	+	A3	46701553-46701562	MD05G1348800_novel02	MD05G1348800_novel01,MD05G1348800_novel02
Chr05	MD05G1351300	-	A3	46836438-46836405	MD05G1351300_novel01	MD05G1351300,MD05G1351300_novel01
Chr05	MD05G1352800	-	A3	46932892-46932847	MD05G1352800_novel02	MD05G1352800,MD05G1352800_novel01,MD05G1352800_novel03,MD05G1352800_novel05,MD05G1352800_novel07,MD05G1352800_novel04,MD05G1352800_novel06,MD05G1352800_novel02
Chr05	MD05G1353400	+	A3	46972805-46972863	MD05G1353400_novel02,MD05G1353400_novel03	MD05G1353400_novel01,MD05G1353400_novel04,MD05G1353400_novel05,MD05G1353400_novel02,MD05G1353400_novel03
Chr05	MD05G1357300	-	A3	47269269-47269230	MD05G1357300_novel01	MD05G1357300,MD05G1357300_novel01
Chr05	MD05G1357700	-	A3	47332616-47332540	MD05G1357700_novel03,MD05G1357700	MD05G1357700_novel02,MD05G1357700,MD05G1357700_novel03
Chr05	MD05G1357700	-	A3	47336010-47335990	MD05G1357700_novel03	MD05G1357700_novel01,MD05G1357700_novel02,MD05G1357700_novel03
Chr05	MD05G1358500	-	A3	47379667-47379630	MD05G1358500_novel02	MD05G1358500_novel05,MD05G1358500_novel02
Chr05	MD05G1358500	-	A3	47379686-47379630	MD05G1358500_novel02	MD05G1358500_novel04,MD05G1358500_novel02
Chr05	MD05G1358500	-	A3	47379686-47379667	MD05G1358500_novel05	MD05G1358500_novel04,MD05G1358500_novel05
Chr05	MD05G1358500	-	A3	47379729-47379630	MD05G1358500_novel02	MD05G1358500_novel03,MD05G1358500_novel02
Chr05	MD05G1358500	-	A3	47379729-47379667	MD05G1358500_novel05	MD05G1358500_novel03,MD05G1358500_novel05
Chr05	MD05G1358500	-	A3	47379729-47379686	MD05G1358500_novel04	MD05G1358500_novel03,MD05G1358500_novel04
Chr05	MD05G1358500	-	A3	47380721-47380706	MD05G1358500_novel06,MD05G1358500_novel07	MD05G1358500,MD05G1358500_novel08,MD05G1358500_novel06,MD05G1358500_novel07
Chr05	MD05G1362500	+	A3	47762548-47762683	MD05G1362500	MD05G1362500_novel03,MD05G1362500_novel04,MD05G1362500
Chr05	MD05G1362500	+	A3	47763099-47763115	MD05G1362500_novel04	MD05G1362500_novel01,MD05G1362500_novel02,MD05G1362500_novel03,MD05G1362500,MD05G1362500_novel05,MD05G1362500_novel04
Chr05	MD05G1363200	+	A3	47799835-47799841	MD05G1363200_novel02	MD05G1363200,MD05G1363200_novel02
Chr05	MD05G1363200	+	A3	47800598-47800612	MD05G1363200_novel02	MD05G1363200_novel01,MD05G1363200,MD05G1363200_novel02
Chr05	MD05G1363200	+	A3	47801370-47801376	MD05G1363200_novel01,MD05G1363200_novel02	MD05G1363200,MD05G1363200_novel01,MD05G1363200_novel02
Chr05	MD05G1364500	-	A3	47936136-47936133	MD05G1364500_novel03,MD05G1364500_novel02,MD05G1364500_novel01	MD05G1364500,MD05G1364500_novel04,MD05G1364500_novel05,MD05G1364500_novel02,MD05G1364500_novel01,MD05G1364500_novel03
Chr05	MD05G1364500	-	A3	47943219-47943133	MD05G1364500_novel02	MD05G1364500,MD05G1364500_novel01,MD05G1364500_novel04,MD05G1364500_novel02
Chr05	MD05G1364500	-	A3	47943580-47943566	MD05G1364500_novel04	MD05G1364500,MD05G1364500_novel02,MD05G1364500_novel01,MD05G1364500_novel03,MD05G1364500_novel04
Chr05	MD05G1364500	-	A3	47943750-47943745	MD05G1364500_novel04	MD05G1364500,MD05G1364500_novel02,MD05G1364500_novel01,MD05G1364500_novel03,MD05G1364500_novel04
Chr05	MD05G1364500	-	A3	47944117-47944011	MD05G1364500,MD05G1364500_novel03,MD05G1364500_novel02	MD05G1364500_novel01,MD05G1364500_novel04,MD05G1364500,MD05G1364500_novel02,MD05G1364500_novel03
Chr06	MD06G1000100	+	A3	26381-26420	MD06G1000100_novel03,MD06G1000100_novel02,MD06G1000100	MD06G1000100_novel01,MD06G1000100_novel04,MD06G1000100_novel02,MD06G1000100,MD06G1000100_novel03
Chr06	MD06G1000100	+	A3	34835-34850	MD06G1000100_novel03,MD06G1000100_novel02	MD06G1000100_novel04,MD06G1000100_novel02,MD06G1000100_novel03
Chr06	MD06G1000600	-	A3	64492-64488	MD06G1000600_novel02	MD06G1000600_novel03,MD06G1000600,MD06G1000600_novel01,MD06G1000600_novel02
Chr06	MD06G1001000	-	A3	101062-101059	MD06G1001000	MD06G1001000_novel01,MD06G1001000
Chr06	MD06G1001300	-	A3	170077-169858	MD06G1001300_novel02,MD06G1001300,MD06G1001300_novel07	MD06G1001300_novel06,MD06G1001300,MD06G1001300_novel02,MD06G1001300_novel07
Chr06	MD06G1001500	-	A3	186905-186886	MD06G1001500_novel10,MD06G1001500,MD06G1001500_novel08,MD06G1001500_novel01,MD06G1001500_novel12,MD06G1001500_novel11,MD06G1001500_novel03,MD06G1001500_novel04,MD06G1001500_novel02,MD06G1001500_novel06	MD06G1001500_novel05,MD06G1001500_novel01,MD06G1001500_novel12,MD06G1001500,MD06G1001500_novel10,MD06G1001500_novel02,MD06G1001500_novel03,MD06G1001500_novel04,MD06G1001500_novel06,MD06G1001500_novel11,MD06G1001500_novel08
Chr06	MD06G1002200	-	A3	236462-236421	MD06G1002200_novel01	MD06G1002200,MD06G1002200_novel01
Chr06	MD06G1002900	+	A3	323761-324090	MD06G1002900_novel01	MD06G1002900_novel02,MD06G1002900_novel01
Chr06	MD06G1005700	-	A3	609353-609350	MD06G1005700	MD06G1005700_novel01,MD06G1005700
Chr06	MD06G1005900	-	A3	625164-625146	MD06G1005900_novel01,MD06G1005900_novel02,MD06G1005900_novel04,MD06G1005900_novel05,MD06G1005900_novel06,MD06G1005900_novel07,MD06G1005900_novel08,MD06G1005900_novel09,MD06G1005900	MD06G1005900_novel03,MD06G1005900_novel02,MD06G1005900,MD06G1005900_novel09,MD06G1005900_novel07,MD06G1005900_novel05,MD06G1005900_novel08,MD06G1005900_novel04,MD06G1005900_novel01,MD06G1005900_novel06
Chr06	MD06G1005900	-	A3	625962-625947	MD06G1005900_novel04	MD06G1005900_novel02,MD06G1005900,MD06G1005900_novel07,MD06G1005900_novel05,MD06G1005900_novel03,MD06G1005900_novel01,MD06G1005900_novel06,MD06G1005900_novel04
Chr06	MD06G1009600	-	A3	1104682-1104643	MD06G1009600	MD06G1009600_novel01,MD06G1009600
Chr06	MD06G1010400	-	A3	1218656-1218633	MD06G1010400,MD06G1010400_novel03,MD06G1010400_novel02	MD06G1010400_novel01,MD06G1010400,MD06G1010400_novel03,MD06G1010400_novel02
Chr06	MD06G1011200	+	A3	1342249-1342271	MD06G1011200_novel02,MD06G1011200	MD06G1011200_novel04,MD06G1011200,MD06G1011200_novel02
Chr06	MD06G1011700	+	A3	1468732-1468740	MD06G1011700_novel01	MD06G1011700,MD06G1011700_novel01
Chr06	MD06G1012100	-	A3	1508808-1508717	MD06G1012100_novel01,MD06G1012100_novel03	MD06G1012100,MD06G1012100_novel02,MD06G1012100_novel01,MD06G1012100_novel03
Chr06	MD06G1012900	+	A3	1635668-1635694	MD06G1012900_novel10,MD06G1012900_novel09,MD06G1012900_novel05,MD06G1012900_novel06,MD06G1012900_novel07,MD06G1012900_novel13,MD06G1012900_novel12,MD06G1012900_novel02,MD06G1012900_novel01,MD06G1012900,MD06G1012900_novel11,MD06G1012900_novel03	MD06G1012900_novel04,MD06G1012900_novel08,MD06G1012900_novel03,MD06G1012900,MD06G1012900_novel02,MD06G1012900_novel01,MD06G1012900_novel05,MD06G1012900_novel06,MD06G1012900_novel07,MD06G1012900_novel10,MD06G1012900_novel11,MD06G1012900_novel12,MD06G1012900_novel09,MD06G1012900_novel13
Chr06	MD06G1012900	+	A3	1636435-1636455	MD06G1012900_novel10,MD06G1012900_novel09,MD06G1012900_novel12,MD06G1012900_novel05	MD06G1012900_novel03,MD06G1012900,MD06G1012900_novel02,MD06G1012900_novel01,MD06G1012900_novel04,MD06G1012900_novel08,MD06G1012900_novel06,MD06G1012900_novel07,MD06G1012900_novel11,MD06G1012900_novel13,MD06G1012900_novel14,MD06G1012900_novel15,MD06G1012900_novel16,MD06G1012900_novel05,MD06G1012900_novel10,MD06G1012900_novel12,MD06G1012900_novel09
Chr06	MD06G1013700	+	A3	1726116-1726125	MD06G1013700_novel03	MD06G1013700_novel01,MD06G1013700,MD06G1013700_novel02,MD06G1013700_novel03
Chr06	MD06G1014100	-	A3	1758790-1758762	MD06G1014100	MD06G1014100_novel01,MD06G1014100
Chr06	MD06G1015300	+	A3	1944372-1944446	MD06G1015300_novel01	MD06G1015300,MD06G1015300_novel02,MD06G1015300_novel01
Chr06	MD06G1021300	+	A3	2673530-2673554	MD06G1021300_novel01	MD06G1021300,MD06G1021300_novel01
Chr06	MD06G1024600	-	A3	3003570-3003556	MD06G1024600	MD06G1024600_novel01,MD06G1024600
Chr06	MD06G1025000	-	A3	3035807-3035792	MD06G1025000_novel02	MD06G1025000_novel01,MD06G1025000_novel02
Chr06	MD06G1025900	+	A3	3130249-3130252	MD06G1025900_novel01	MD06G1025900,MD06G1025900_novel01
Chr06	MD06G1026900	+	A3	3326140-3326144	MD06G1026900_novel06	MD06G1026900,MD06G1026900_novel06
Chr06	MD06G1026900	+	A3	3326140-3326170	MD06G1026900_novel01	MD06G1026900,MD06G1026900_novel01
Chr06	MD06G1026900	+	A3	3326140-3326180	MD06G1026900_novel03	MD06G1026900,MD06G1026900_novel03
Chr06	MD06G1026900	+	A3	3326140-3326204	MD06G1026900_novel02	MD06G1026900,MD06G1026900_novel02
Chr06	MD06G1026900	+	A3	3326144-3326170	MD06G1026900_novel01	MD06G1026900_novel06,MD06G1026900_novel01
Chr06	MD06G1026900	+	A3	3326144-3326180	MD06G1026900_novel03	MD06G1026900_novel06,MD06G1026900_novel03
Chr06	MD06G1026900	+	A3	3326144-3326204	MD06G1026900_novel02	MD06G1026900_novel06,MD06G1026900_novel02
Chr06	MD06G1026900	+	A3	3326170-3326180	MD06G1026900_novel03	MD06G1026900_novel01,MD06G1026900_novel03
Chr06	MD06G1026900	+	A3	3326170-3326204	MD06G1026900_novel02	MD06G1026900_novel01,MD06G1026900_novel02
Chr06	MD06G1026900	+	A3	3326180-3326204	MD06G1026900_novel02	MD06G1026900_novel03,MD06G1026900_novel02
Chr06	MD06G1032500	+	A3	3891757-3891788	MD06G1032500_novel01	MD06G1032500,MD06G1032500_novel01
Chr06	MD06G1032800	-	A3	3918655-3918574	MD06G1032800	MD06G1032800_novel01,MD06G1032800
Chr06	MD06G1033000	+	A3	3957645-3957652	MD06G1033000	MD06G1033000_novel01,MD06G1033000
Chr06	MD06G1036900	+	A3	4701022-4701046	MD06G1036900_novel02	MD06G1036900,MD06G1036900_novel02
Chr06	MD06G1037000	+	A3	4706591-4706605	MD06G1037000	MD06G1037000_novel01,MD06G1037000
Chr06	MD06G1037700	+	A3	4835545-4835561	MD06G1037700	MD06G1037700_novel01,MD06G1037700_novel02,MD06G1037700_novel03,MD06G1037700
Chr06	MD06G1039300	-	A3	5016124-5016069	MD06G1039300_novel01	MD06G1039300,MD06G1039300_novel02,MD06G1039300_novel01
Chr06	MD06G1039500	-	A3	5107135-5107125	MD06G1039500_novel04	MD06G1039500,MD06G1039500_novel03,MD06G1039500_novel11,MD06G1039500_novel08,MD06G1039500_novel09,MD06G1039500_novel02,MD06G1039500_novel05,MD06G1039500_novel01,MD06G1039500_novel10,MD06G1039500_novel06,MD06G1039500_novel07,MD06G1039500_novel04
Chr06	MD06G1040100	+	A3	5191633-5191641	MD06G1040100_novel03,MD06G1040100_novel02	MD06G1040100,MD06G1040100_novel02,MD06G1040100_novel03
Chr06	MD06G1040100	+	A3	5192721-5192729	MD06G1040100,MD06G1040100_novel01	MD06G1040100_novel03,MD06G1040100,MD06G1040100_novel01
Chr06	MD06G1042600	+	A3	5590536-5590558	MD06G1042600_novel01	MD06G1042600,MD06G1042600_novel04,MD06G1042600_novel03,MD06G1042600_novel02,MD06G1042600_novel05,MD06G1042600_novel06,MD06G1042600_novel01
Chr06	MD06G1043200	-	A3	5664381-5664379	MD06G1043200_novel09,MD06G1043200_novel08,MD06G1043200_novel01,MD06G1043200_novel05,MD06G1043200_novel04,MD06G1043200_novel10,MD06G1043200_novel06,MD06G1043200_novel07	MD06G1043200_novel03,MD06G1043200_novel04,MD06G1043200_novel08,MD06G1043200_novel06,MD06G1043200_novel01,MD06G1043200_novel05,MD06G1043200_novel10,MD06G1043200_novel09,MD06G1043200_novel07
Chr06	MD06G1043800	+	A3	5868655-5868735	MD06G1043800,MD06G1043800_novel01	MD06G1043800_novel02,MD06G1043800_novel01,MD06G1043800
Chr06	MD06G1043800	+	A3	5897258-5897286	MD06G1043800_novel05	MD06G1043800,MD06G1043800_novel03,MD06G1043800_novel04,MD06G1043800_novel05
Chr06	MD06G1044800	-	A3	6118674-6118652	MD06G1044800,MD06G1044800_novel09,MD06G1044800_novel06,MD06G1044800_novel10,MD06G1044800_novel04,MD06G1044800_novel05,MD06G1044800_novel02,MD06G1044800_novel03,MD06G1044800_novel01,MD06G1044800_novel07	MD06G1044800_novel08,MD06G1044800_novel01,MD06G1044800_novel02,MD06G1044800_novel10,MD06G1044800_novel05,MD06G1044800_novel03,MD06G1044800_novel06,MD06G1044800_novel04,MD06G1044800_novel07,MD06G1044800_novel09,MD06G1044800
Chr06	MD06G1044800	-	A3	6118857-6118842	MD06G1044800_novel04,MD06G1044800_novel03	MD06G1044800_novel01,MD06G1044800_novel02,MD06G1044800_novel05,MD06G1044800_novel06,MD06G1044800_novel07,MD06G1044800_novel08,MD06G1044800_novel09,MD06G1044800,MD06G1044800_novel03,MD06G1044800_novel04
Chr06	MD06G1044800	-	A3	6119717-6119714	MD06G1044800_novel01	MD06G1044800_novel04,MD06G1044800_novel01
Chr06	MD06G1044800	-	A3	6119717-6119714	MD06G1044800_novel06	MD06G1044800_novel02,MD06G1044800_novel03,MD06G1044800,MD06G1044800_novel06
Chr06	MD06G1048100	-	A3	6511025-6509645	MD06G1048100,MD06G1048100_novel01	MD06G1048100_novel02,MD06G1048100,MD06G1048100_novel01
Chr06	MD06G1050700	+	A3	6948025-6948044	MD06G1050700_novel02,MD06G1050700_novel04	MD06G1050700,MD06G1050700_novel01,MD06G1050700_novel06,MD06G1050700_novel08,MD06G1050700_novel03,MD06G1050700_novel07,MD06G1050700_novel05,MD06G1050700_novel09,MD06G1050700_novel02,MD06G1050700_novel04
Chr06	MD06G1050700	+	A3	6948958-6948973	MD06G1050700,MD06G1050700_novel02,MD06G1050700_novel03	MD06G1050700_novel01,MD06G1050700_novel06,MD06G1050700_novel08,MD06G1050700_novel04,MD06G1050700_novel07,MD06G1050700_novel05,MD06G1050700_novel09,MD06G1050700,MD06G1050700_novel02,MD06G1050700_novel03
Chr06	MD06G1050700	+	A3	6954836-6954876	MD06G1050700_novel06	MD06G1050700_novel01,MD06G1050700_novel06
Chr06	MD06G1050700	+	A3	6954836-6954922	MD06G1050700,MD06G1050700_novel08,MD06G1050700_novel02,MD06G1050700_novel03,MD06G1050700_novel04,MD06G1050700_novel05,MD06G1050700_novel07	MD06G1050700_novel01,MD06G1050700,MD06G1050700_novel02,MD06G1050700_novel08,MD06G1050700_novel03,MD06G1050700_novel04,MD06G1050700_novel07,MD06G1050700_novel05
Chr06	MD06G1050700	+	A3	6954876-6954922	MD06G1050700,MD06G1050700_novel08,MD06G1050700_novel02,MD06G1050700_novel03,MD06G1050700_novel04,MD06G1050700_novel05,MD06G1050700_novel07	MD06G1050700_novel06,MD06G1050700,MD06G1050700_novel02,MD06G1050700_novel08,MD06G1050700_novel03,MD06G1050700_novel04,MD06G1050700_novel07,MD06G1050700_novel05
Chr06	MD06G1052400	+	A3	7635161-7635940	MD06G1052400	MD06G1052400_novel01,MD06G1052400
Chr06	MD06G1053000	-	A3	7669384-7669354	MD06G1053000_novel02,MD06G1053000	MD06G1053000_novel01,MD06G1053000,MD06G1053000_novel02
Chr06	MD06G1054500	+	A3	7952800-7952802	MD06G1054500	MD06G1054500_novel01,MD06G1054500
Chr06	MD06G1055600	+	A3	8316498-8316507	MD06G1055600	MD06G1055600_novel03,MD06G1055600_novel01,MD06G1055600_novel09,MD06G1055600_novel04,MD06G1055600_novel06,MD06G1055600_novel05,MD06G1055600_novel08,MD06G1055600_novel07,MD06G1055600_novel02,MD06G1055600_novel11,MD06G1055600_novel12,MD06G1055600_novel13,MD06G1055600
Chr06	MD06G1055700	+	A3	8324326-8324341	MD06G1055700_novel01	MD06G1055700,MD06G1055700_novel01
Chr06	MD06G1057100	+	A3	8684004-8684098	MD06G1057100_novel13,MD06G1057100_novel06	MD06G1057100_novel07,MD06G1057100_novel02,MD06G1057100_novel08,MD06G1057100_novel10,MD06G1057100_novel11,MD06G1057100_novel05,MD06G1057100_novel13,MD06G1057100_novel06
Chr06	MD06G1057100	+	A3	8689293-8689335	MD06G1057100,MD06G1057100_novel05,MD06G1057100_novel04,MD06G1057100_novel02,MD06G1057100_novel01,MD06G1057100_novel10,MD06G1057100_novel11,MD06G1057100_novel12,MD06G1057100_novel13,MD06G1057100_novel07,MD06G1057100_novel06,MD06G1057100_novel16,MD06G1057100_novel17,MD06G1057100_novel18,MD06G1057100_novel08,MD06G1057100_novel15	MD06G1057100_novel03,MD06G1057100_novel07,MD06G1057100_novel02,MD06G1057100_novel08,MD06G1057100_novel10,MD06G1057100_novel04,MD06G1057100_novel01,MD06G1057100_novel11,MD06G1057100,MD06G1057100_novel05,MD06G1057100_novel13,MD06G1057100_novel12,MD06G1057100_novel06,MD06G1057100_novel15,MD06G1057100_novel17,MD06G1057100_novel16,MD06G1057100_novel18
Chr06	MD06G1057100	+	A3	8689646-8689661	MD06G1057100,MD06G1057100_novel04,MD06G1057100_novel03,MD06G1057100_novel02,MD06G1057100_novel10,MD06G1057100_novel11,MD06G1057100_novel12,MD06G1057100_novel13,MD06G1057100_novel07,MD06G1057100_novel17,MD06G1057100_novel08,MD06G1057100_novel15	MD06G1057100_novel01,MD06G1057100_novel05,MD06G1057100_novel06,MD06G1057100_novel16,MD06G1057100_novel18,MD06G1057100_novel07,MD06G1057100_novel02,MD06G1057100_novel08,MD06G1057100_novel03,MD06G1057100_novel10,MD06G1057100_novel04,MD06G1057100_novel11,MD06G1057100,MD06G1057100_novel13,MD06G1057100_novel12,MD06G1057100_novel15,MD06G1057100_novel17
Chr06	MD06G1059400	-	A3	9141578-9141569	MD06G1059400_novel02	MD06G1059400_novel01,MD06G1059400_novel06,MD06G1059400_novel02
Chr06	MD06G1059400	-	A3	9141587-9141569	MD06G1059400_novel02	MD06G1059400_novel03,MD06G1059400_novel02
Chr06	MD06G1059400	-	A3	9141587-9141578	MD06G1059400_novel01,MD06G1059400_novel06	MD06G1059400_novel03,MD06G1059400_novel01,MD06G1059400_novel06
Chr06	MD06G1060400	-	A3	9345195-9345190	MD06G1060400_novel10	MD06G1060400_novel09,MD06G1060400,MD06G1060400_novel10
Chr06	MD06G1060400	-	A3	9347183-9346853	MD06G1060400_novel10,MD06G1060400_novel05	MD06G1060400_novel04,MD06G1060400_novel05,MD06G1060400_novel10
Chr06	MD06G1062300	-	A3	10483775-10483771	MD06G1062300_novel02	MD06G1062300_novel01,MD06G1062300_novel03,MD06G1062300,MD06G1062300_novel02
Chr06	MD06G1065400	-	A3	13527554-13527544	MD06G1065400,MD06G1065400_novel09,MD06G1065400_novel08,MD06G1065400_novel06,MD06G1065400_novel05,MD06G1065400_novel04,MD06G1065400_novel03,MD06G1065400_novel02,MD06G1065400_novel01	MD06G1065400_novel07,MD06G1065400_novel04,MD06G1065400,MD06G1065400_novel02,MD06G1065400_novel05,MD06G1065400_novel08,MD06G1065400_novel03,MD06G1065400_novel01,MD06G1065400_novel09,MD06G1065400_novel06
Chr06	MD06G1067000	-	A3	14249355-14249336	MD06G1067000,MD06G1067000_novel02	MD06G1067000_novel01,MD06G1067000_novel02,MD06G1067000
Chr06	MD06G1067900	-	A3	15268242-15268234	MD06G1067900_novel01,MD06G1067900_novel02	MD06G1067900,MD06G1067900_novel01,MD06G1067900_novel02
Chr06	MD06G1068100	+	A3	16109815-16109830	MD06G1068100	MD06G1068100_novel01,MD06G1068100
Chr06	MD06G1070800	+	A3	17195707-17195737	MD06G1070800	MD06G1070800_novel01,MD06G1070800
Chr06	MD06G1073600	-	A3	18296840-18296769	MD06G1073600,MD06G1073600_novel02,MD06G1073600_novel04,MD06G1073600_novel08,MD06G1073600_novel11,MD06G1073600_novel10	MD06G1073600_novel09,MD06G1073600_novel01,MD06G1073600_novel03,MD06G1073600_novel05,MD06G1073600_novel06,MD06G1073600_novel07,MD06G1073600,MD06G1073600_novel08,MD06G1073600_novel10,MD06G1073600_novel02,MD06G1073600_novel11,MD06G1073600_novel04
Chr06	MD06G1076400	+	A3	18864194-18864199	MD06G1076400_novel01	MD06G1076400,MD06G1076400_novel01
Chr06	MD06G1076800	-	A3	19067251-19067231	MD06G1076800_novel02	MD06G1076800,MD06G1076800_novel02
Chr06	MD06G1076900	+	A3	19071108-19071144	MD06G1076900_novel02,MD06G1076900_novel01	MD06G1076900,MD06G1076900_novel01,MD06G1076900_novel02
Chr06	MD06G1077400	-	A3	19217871-19217852	MD06G1077400_novel01	MD06G1077400,MD06G1077400_novel01
Chr06	MD06G1077900	-	A3	19285586-19285579	MD06G1077900_novel02	MD06G1077900,MD06G1077900_novel01,MD06G1077900_novel03,MD06G1077900_novel02
Chr06	MD06G1081900	-	A3	20087969-20087965	MD06G1081900_novel02	MD06G1081900,MD06G1081900_novel01,MD06G1081900_novel02
Chr06	MD06G1082000	+	A3	20138009-20138052	MD06G1082000_novel02	MD06G1082000_novel01,MD06G1082000_novel03,MD06G1082000,MD06G1082000_novel04,MD06G1082000_novel05,MD06G1082000_novel06,MD06G1082000_novel02
Chr06	MD06G1082000	+	A3	20138816-20138823	MD06G1082000_novel01,MD06G1082000_novel02,MD06G1082000_novel04,MD06G1082000_novel05,MD06G1082000_novel06,MD06G1082000	MD06G1082000_novel03,MD06G1082000_novel01,MD06G1082000_novel02,MD06G1082000,MD06G1082000_novel04,MD06G1082000_novel05,MD06G1082000_novel06
Chr06	MD06G1082500	-	A3	20280459-20280456	MD06G1082500_novel16,MD06G1082500_novel17,MD06G1082500_novel15,MD06G1082500_novel12,MD06G1082500_novel13,MD06G1082500_novel10,MD06G1082500_novel11,MD06G1082500_novel09,MD06G1082500_novel08,MD06G1082500_novel03,MD06G1082500_novel18,MD06G1082500_novel19,MD06G1082500_novel23,MD06G1082500_novel02,MD06G1082500_novel21,MD06G1082500_novel22,MD06G1082500_novel05,MD06G1082500,MD06G1082500_novel04,MD06G108…	MD06G1082500_novel14,MD06G1082500,MD06G1082500_novel32,MD06G1082500_novel13,MD06G1082500_novel16,MD06G1082500_novel02,MD06G1082500_novel04,MD06G1082500_novel08,MD06G1082500_novel29,MD06G1082500_novel07,MD06G1082500_novel23,MD06G1082500_novel17,MD06G1082500_novel09,MD06G1082500_novel27,MD06G1082500_novel18,MD06G1082500_novel01,MD06G1082500_novel10,MD06G1082500_novel22,MD06G1082500_novel06,MD06G108…
Chr06	MD06G1082500	-	A3	20281199-20281136	MD06G1082500_novel16,MD06G1082500_novel17,MD06G1082500_novel14,MD06G1082500_novel13,MD06G1082500_novel11,MD06G1082500_novel08,MD06G1082500_novel18,MD06G1082500_novel19,MD06G1082500_novel22,MD06G1082500_novel05,MD06G1082500_novel07,MD06G1082500_novel27,MD06G1082500_novel01,MD06G1082500_novel30,MD06G1082500_novel31,MD06G1082500	MD06G1082500_novel02,MD06G1082500_novel04,MD06G1082500_novel29,MD06G1082500_novel23,MD06G1082500_novel09,MD06G1082500_novel10,MD06G1082500_novel06,MD06G1082500_novel21,MD06G1082500_novel15,MD06G1082500_novel33,MD06G1082500_novel12,MD06G1082500_novel34,MD06G1082500_novel20,MD06G1082500,MD06G1082500_novel13,MD06G1082500_novel16,MD06G1082500_novel08,MD06G1082500_novel07,MD06G1082500_novel14,MD06G108…
Chr06	MD06G1082500	-	A3	20281208-20281136	MD06G1082500_novel16,MD06G1082500_novel17,MD06G1082500_novel05,MD06G1082500_novel13,MD06G1082500_novel07,MD06G1082500_novel11,MD06G1082500_novel08,MD06G1082500_novel14,MD06G1082500_novel18,MD06G1082500_novel19,MD06G1082500_novel22,MD06G1082500_novel01,MD06G1082500_novel30,MD06G1082500_novel31,MD06G1082500,MD06G1082500_novel27	MD06G1082500_novel03,MD06G1082500,MD06G1082500_novel13,MD06G1082500_novel16,MD06G1082500_novel08,MD06G1082500_novel07,MD06G1082500_novel14,MD06G1082500_novel17,MD06G1082500_novel27,MD06G1082500_novel18,MD06G1082500_novel01,MD06G1082500_novel22,MD06G1082500_novel30,MD06G1082500_novel31,MD06G1082500_novel19,MD06G1082500_novel11,MD06G1082500_novel05
Chr06	MD06G1082500	-	A3	20281208-20281199	MD06G1082500_novel33,MD06G1082500_novel02,MD06G1082500_novel12,MD06G1082500_novel04,MD06G1082500_novel10,MD06G1082500_novel06,MD06G1082500_novel09,MD06G1082500_novel29,MD06G1082500_novel15,MD06G1082500_novel23,MD06G1082500_novel21,MD06G1082500_novel20,MD06G1082500_novel34	MD06G1082500_novel03,MD06G1082500_novel02,MD06G1082500_novel04,MD06G1082500_novel29,MD06G1082500_novel23,MD06G1082500_novel09,MD06G1082500_novel10,MD06G1082500_novel06,MD06G1082500_novel21,MD06G1082500_novel15,MD06G1082500_novel33,MD06G1082500_novel12,MD06G1082500_novel34,MD06G1082500_novel20
Chr06	MD06G1082500	-	A3	20281508-20281503	MD06G1082500_novel18,MD06G1082500_novel26,MD06G1082500_novel25	MD06G1082500,MD06G1082500_novel32,MD06G1082500_novel13,MD06G1082500_novel16,MD06G1082500_novel02,MD06G1082500_novel04,MD06G1082500_novel08,MD06G1082500_novel29,MD06G1082500_novel07,MD06G1082500_novel23,MD06G1082500_novel14,MD06G1082500_novel17,MD06G1082500_novel09,MD06G1082500_novel28,MD06G1082500_novel27,MD06G1082500_novel01,MD06G1082500_novel10,MD06G1082500_novel22,MD06G1082500_novel06,MD06G108…
Chr06	MD06G1082500	-	A3	20283210-20283205	MD06G1082500_novel17,MD06G1082500_novel29,MD06G1082500_novel20	MD06G1082500,MD06G1082500_novel32,MD06G1082500_novel13,MD06G1082500_novel16,MD06G1082500_novel02,MD06G1082500_novel04,MD06G1082500_novel08,MD06G1082500_novel07,MD06G1082500_novel23,MD06G1082500_novel14,MD06G1082500_novel09,MD06G1082500_novel28,MD06G1082500_novel27,MD06G1082500_novel18,MD06G1082500_novel01,MD06G1082500_novel25,MD06G1082500_novel10,MD06G1082500_novel22,MD06G1082500_novel06,MD06G108…
Chr06	MD06G1082500	-	A3	20284862-20284843	MD06G1082500_novel16,MD06G1082500_novel17,MD06G1082500_novel14,MD06G1082500_novel15,MD06G1082500_novel12,MD06G1082500_novel13,MD06G1082500_novel10,MD06G1082500_novel11,MD06G1082500_novel09,MD06G1082500_novel08,MD06G1082500_novel03,MD06G1082500_novel18,MD06G1082500_novel19,MD06G1082500_novel02,MD06G1082500_novel05,MD06G1082500_novel04,MD06G1082500_novel07,MD06G1082500_novel06,MD06G1082500_novel01,…	MD06G1082500,MD06G1082500_novel13,MD06G1082500_novel16,MD06G1082500_novel02,MD06G1082500_novel04,MD06G1082500_novel08,MD06G1082500_novel07,MD06G1082500_novel23,MD06G1082500_novel14,MD06G1082500_novel17,MD06G1082500_novel09,MD06G1082500_novel27,MD06G1082500_novel18,MD06G1082500_novel01,MD06G1082500_novel25,MD06G1082500_novel10,MD06G1082500_novel22,MD06G1082500_novel06,MD06G1082500_novel21,MD06G108…
[truncated: 20,424 more rows]

## Sheet: Sheet1
Sample name	Total genes	SE	MX	RI	A5	A3	AF	AL
Mix0_5d	20163	1564	52	4506	2664	3790	293	100
