# Supplementary material for: PacBio full-length transcriptome of wild apple (Malus sieversii) provides insights into canker disease dynamic response
Source: BMC Genomics. 2021 Jan 14;22:52. doi: 10.1186/s12864-021-07366-y (PMC7809858; doi:10.1186/s12864-021-07366-y)
Supplement: Supplementary file 4 — Additional file 4. Details regarding fusion gene. [file 12864_2021_7366_MOESM4_ESM.xlsx]

## Sheet: Mix0_5d.fusion.anno
transcriptID	block1.start	block1.end	block1.chr	block1.strand	block1.chrstart	block1.chrend	block1.geneid	block1.coverage	block2.start	block2.end	block2.chr	block2.strand	block2.chrstart	block2.chrend	block2.geneid	block2.coverage
i1_LQ_Mix0_5d_c35032/f1p0/1770	1	673	Chr00	-	33139307	33168076	notsure	38	674	1772	Chr11	+	23683282	23693410	notsure	62
i1_LQ_Mix0_5d_c94085/f1p0/1421	1	217	Chr11	-	17009374	17009591	MD11G1164800	15.3	218	1422	Chr00	+	5182567	5184943	MD00G1031100	84.7
i3_HQ_Mix0_5d_c5943/f5p0/3126	1	2702	Chr15	+	14165161	14169866	MD15G1179600	86.4	2703	3126	Chr16	-	2690574	2690997	notsure	13.6
i2_LQ_Mix0_5d_c67093/f1p11/2092	1	1670	Chr15	+	2311576	2314968	MD15G1033000	80	1671	2086	Chr14	+	25327471	25327885	MD14G1159200	19.9
i3_LQ_Mix0_5d_c23896/f1p4/3256	1	1804	Chr13	-	38739663	38744826	MD13G1277900	55.4	1805	3256	Chr00	-	51397146	51399334	MD00G1214800	44.6
i4_LQ_Mix0_5d_c2623/f1p0/4398	2	1711	Chr11	-	15531849	15534565	MD11G1159200	37.2	1712	4598	Chr12	+	7128997	7132525	MD12G1061300	62.8
i3_HQ_Mix0_5d_c5294/f2p22/3544	1	2366	Chr02	-	6352272	6354629	MD02G1080500	66.7	2367	3542	Chr10	-	23679204	23682125	MD10G1149500	33.2
i2_HQ_Mix0_5d_c173201/f32p10/2276	1	457	Chr00	-	50127816	50129214	MD00G1205700	20.1	458	2272	Chr08	-	12294805	12301701	MD08G1130500	79.9
i1_HQ_Mix0_5d_c138570/f2p0/1235	8	941	Chr07	+	25543568	25546197	MD07G1176100	75.6	942	1235	Chr01	+	22310044	22310335	MD01G1110300	23.8
i2_LQ_Mix0_5d_c119275/f1p502/2310	1	1127	Chr10	+	39893983	39895814	MD10G1314900	48.8	1128	2310	Chr05	+	46186334	46187516	MD05G1341400	51.2
i2_HQ_Mix0_5d_c172401/f3p3/2911	1	1850	Chr13	-	38739663	38744873	MD13G1277900	63.5	1851	2912	Chr00	-	51397207	51399334	MD00G1214800	36.5
i2_LQ_Mix0_5d_c12373/f1p8/2568	3	1372	Chr08	-	5263346	5266041	MD08G1065800	52.9	1373	2592	Chr15	+	3757468	3758695	MD15G1055600	47.1
i2_LQ_Mix0_5d_c148312/f1p7/3077	1	2190	Chr15	-	2838809	2844486	MD15G1040300,MD15G1040200,MD15G1040400	71.1	2191	3077	Chr08	+	4460075	4461555	MD08G1057200	28.8
i2_LQ_Mix0_5d_c17744/f1p0/3008	1	630	Chr07	-	28388633	28389427	notsure	20.9	631	3009	Chr16	-	16112162	16116033	MD16G1186700	79.1
i5_LQ_Mix0_5d_c368/f1p0/5953	35	3957	Chr11	-	5969455	6025275	MD11G1070200,MD11G1069900,MD11G1069800,MD11G1070400,MD11G1070100,MD11G1069600,MD11G1070000	65.7	3958	5968	Chr11	+	5738411	5815961	MD11G1067500,MD11G1067800,MD11G1067000,MD11G1067100	33.7
i1_HQ_Mix0_5d_c30082/f2p8/1523	1	370	Chr07	+	1339556	1339925	notsure	24.4	371	1519	Chr08	-	10883534	10884686	notsure	75.6
i2_LQ_Mix0_5d_c152749/f1p3/2619	1	765	Chr16	-	626067	627149	MD16G1008300	29.2	766	2624	Chr15	-	7351215	7360202	MD15G1105000,MD15G1104800	70.8
i3_LQ_Mix0_5d_c15762/f1p0/3140	1	1444	Chr13	+	21168139	21170873	MD13G1219100	46	1445	3141	Chr10	-	6150725	6154766	MD10G1046000	54
i2_LQ_Mix0_5d_c31996/f1p11/2235	1	1754	Chr15	+	2311525	2318818	MD15G1033000	78.6	1755	2232	Chr08	+	25430593	25443329	notsure	21.4
i2_LQ_Mix0_5d_c35790/f1p4/2341	2	1244	Chr09	+	18098009	18103321	MD09G1198500	53.1	1245	2340	Chr02	+	36287852	36289081	notsure	46.8
i0_LQ_Mix0_5d_c6681/f1p3/604	1	266	Chr00	+	34754904	34755237	notsure	44	267	605	Chr05	-	16556782	16557155	notsure	56
i1_LQ_Mix0_5d_c169386/f1p0/1892	1	825	Chr16	+	38918635	38919459	MD16G1283000	43.7	826	1890	Chr00	-	48263539	48264605	MD00G1202200	56.3
i0_LQ_Mix0_5d_c8938/f1p0/960	4	289	Chr06	+	35537318	35537604	MD06G1224600	29.7	290	963	Chr10	-	24644867	24645824	MD10G1157700	70
i1_LQ_Mix0_5d_c120210/f1p7/1891	1	198	Chr09	-	15025581	15025778	notsure	10.4	199	1909	Chr02	+	8320293	8325103	notsure	89.6
i2_LQ_Mix0_5d_c24954/f1p9/2254	2	1886	Chr15	+	2311576	2314968	MD15G1033000	83.6	1887	2254	Chr14	+	25327471	25327837	MD14G1159200	16.3
i2_LQ_Mix0_5d_c97806/f1p14/2249	2	614	Chr02	-	14050391	14050972	notsure	27.2	615	2250	Chr13	-	5734267	5736599	MD13G1081700	72.7
i1_LQ_Mix0_5d_c156497/f1p0/1834	1	229	Chr16	-	14905127	14905351	notsure	12.4	230	1846	Chr02	+	30309390	30405805	MD02G1251900,MD02G1252200,MD02G1252100,MD02G1251500,MD02G1252000,MD02G1251600,MD02G1252300,MD02G1251700	87.6
i1_LQ_Mix0_5d_c76163/f1p0/1699	1	1202	Chr04	+	13023263	13024485	notsure	70.7	1203	1701	Chr04	-	13180253	13180706	notsure	29.3
i2_HQ_Mix0_5d_c144422/f3p0/2082	1	1759	Chr00	-	50796504	50800373	MD00G1208500,MD00G1208400	84.4	1760	2083	Chr05	-	47947473	47947915	MD05G1364600	15.6
i1_LQ_Mix0_5d_c33167/f1p0/1502	1	582	Chr15	+	19759319	19761217	MD15G1240100	38	583	1533	Chr00	-	8779358	8781299	MD00G1047200	62
i2_LQ_Mix0_5d_c52726/f1p26/2476	1	491	Chr11	+	12181039	12181507	MD11G1133100	19.9	492	2468	Chr05	-	17748519	17752863	MD05G1085100	80.1
i3_LQ_Mix0_5d_c6240/f1p5/3830	38	2013	Chr16	+	2426752	2432096	MD16G1033700	49.8	2014	3964	Chr13	-	2246514	2250131	MD13G1031500	49.2
i3_LQ_Mix0_5d_c16371/f1p0/3424	4	2814	Chr00	+	51214576	51219865	MD00G1214400,MD00G1214500	82.1	2815	3425	Chr07	+	2888418	2889029	MD07G1035200	17.8
i2_LQ_Mix0_5d_c31330/f1p9/2590	7	741	Chr05	+	36260972	36261686	notsure	28.4	742	2589	Chr00	+	16037254	16045352	MD00G1080100	71.4
i1_LQ_Mix0_5d_c49741/f1p0/1620	1	1391	Chr04	-	1278442	1281107	MD04G1011300	82.1	1392	1695	Chr11	-	11843372	11843686	MD11G1130600	17.9
i2_LQ_Mix0_5d_c47529/f1p85/2913	1	2575	Chr11	-	219591	223888	MD11G1002400	88.3	2576	2915	Chr03	-	174392	174739	MD03G1002500	11.7
i3_LQ_Mix0_5d_c6533/f1p0/3230	4	2405	Chr02	-	3292749	3296389	MD02G1040600	74.3	2406	3209	Chr00	+	4471574	4525237	MD00G1027000,MD00G1027100,MD00G1026100,MD00G1026500	24.9
i1_LQ_Mix0_5d_c60773/f1p0/1636	1	454	Chr12	+	12773233	12774792	notsure	27.5	455	1649	Chr13	-	3281552	3282747	notsure	72.5
i2_LQ_Mix0_5d_c31651/f1p9/2411	1	1696	Chr00	-	6070428	6519754	MD00G1036900,MD00G1036700,MD00G1035400,MD00G1036300,MD00G1034700,MD00G1034800,MD00G1035200,MD00G1036200,MD00G1035600,MD00G1035300,MD00G1035700,MD00G1036100	70.3	1697	2413	Chr04	-	21091624	21102043	notsure	29.7
i2_LQ_Mix0_5d_c68378/f1p51/2822	1	1324	Chr05	-	42682400	42720397	MD05G1294800,MD05G1294500,MD05G1294700,MD05G1294600,MD05G1294300,MD05G1295000,MD05G1294400	46.8	1325	2832	Chr10	-	36446781	36449542	MD10G1273000	53.2
i2_LQ_Mix0_5d_c98235/f1p2/2825	1	2290	Chr14	+	30224135	30226523	MD14G1220000	80.9	2291	2831	Chr08	+	11537073	11537824	notsure	19.1
i2_LQ_Mix0_5d_c65295/f1p4/2335	1	534	Chr14	+	14508393	14508926	notsure	22.9	535	2332	Chr12	-	3069190	3073713	MD12G1027300	77.1
i3_LQ_Mix0_5d_c7271/f1p0/3143	24	1281	Chr17	-	10786267	10790557	MD17G1124200	40	1282	3142	Chr08	+	866005	869022	MD08G1011200	59.2
i1_LQ_Mix0_5d_c17668/f1p0/1855	1	1227	Chr00	+	1744010	1748061	MD00G1014000	65.9	1228	1860	Chr10	-	25506676	25508677	notsure	34
i2_LQ_Mix0_5d_c99420/f1p9/2910	1	1348	Chr05	-	47380891	47382444	MD05G1358500	46.2	1349	2901	Chr10	-	40990958	40992523	MD10G1332600	53.3
i2_LQ_Mix0_5d_c8022/f1p9/2454	1	401	Chr07	+	15779039	15779508	MD07G1122800	16.4	402	2444	Chr11	+	6913965	6939602	MD11G1081200,MD11G1081100	83.6
i2_HQ_Mix0_5d_c173647/f155p3/2682	1	517	Chr00	-	10021423	10022172	MD00G1053600	19.3	518	2682	Chr17	-	14584618	14598277	MD17G1154300	80.7
i2_HQ_Mix0_5d_c20841/f2p0/2254	1	829	Chr15	+	1577381	1584485	MD15G1026800,MD15G1026700	36.8	830	2243	Chr05	-	45864194	45866301	MD05G1336800	62.7
i2_LQ_Mix0_5d_c72678/f1p1/2036	1	590	Chr11	+	3087555	3088441	notsure	29	591	2036	Chr02	+	30309390	30405614	MD02G1251900,MD02G1252200,MD02G1252100,MD02G1251500,MD02G1252000,MD02G1251600,MD02G1252300,MD02G1251700	71
i1_LQ_Mix0_5d_c61560/f1p0/1611	1	693	Chr05	-	33105655	33110794	MD05G1202200	43	694	1612	Chr05	+	21364214	21368230	notsure	57
i2_LQ_Mix0_5d_c3168/f1p41/2283	1	1480	Chr17	-	28948676	28950152	MD17G1240300	64.8	1481	2284	Chr08	+	7757963	7760598	MD08G1093200,MD08G1093100	35.2
i1_LQ_Mix0_5d_c101486/f1p0/1511	1	1112	Chr06	-	34846790	34848918	MD06G1216300	70.1	1113	1587	Chr03	+	30321667	30322149	notsure	29.9
i1_LQ_Mix0_5d_c140343/f1p0/1807	1	570	Chr16	+	38918635	38919204	MD16G1283000	31.5	571	1808	Chr00	-	48263621	48400109	MD00G1202400,MD00G1202900,MD00G1202600,MD00G1202200,MD00G1202700,MD00G1202300,MD00G1202800	68.5
i2_LQ_Mix0_5d_c77444/f1p11/2312	1	365	Chr05	-	45418084	45418448	MD05G1329000	15.7	366	2318	Chr05	-	37823794	37827170	MD05G1247000	84.3
i2_LQ_Mix0_5d_c6883/f1p11/2274	1	916	Chr16	+	10381693	10383229	MD16G1135200	40.1	917	2267	Chr01	-	22284121	22286535	MD01G1110100	59.2
i2_LQ_Mix0_5d_c97016/f2p3/2171	1	1104	Chr11	-	42990629	42994149	MD11G1318000	50.2	1105	2200	Chr12	+	27937292	27939123	MD12G1198300	49.8
i1_LQ_Mix0_5d_c79118/f1p34/1221	4	1102	Chr04	-	18903592	18905939	MD04G1102200	88.8	1103	1237	Chr00	+	23029118	23052577	notsure	10.9
i3_LQ_Mix0_5d_c31009/f1p25/3589	1	2601	Chr02	+	1588517	1593385	MD02G1022800	72.4	2602	3594	Chr11	+	15699055	15700049	MD11G1160100	27.6
i3_LQ_Mix0_5d_c8296/f1p0/3122	1	2358	Chr04	+	28852181	28863251	MD04G1202800,MD04G1202700,MD04G1202600	73	2359	3228	Chr04	-	13179770	13180624	notsure	27
i3_HQ_Mix0_5d_c37487/f4p8/3006	13	383	Chr07	-	23939975	23940434	notsure	12.4	384	3004	Chr02	+	14043472	14048353	MD02G1164400,MD02G1164500	87.3
i2_LQ_Mix0_5d_c35518/f1p43/2833	21	662	Chr05	+	27125251	27126257	MD05G1140600	22.7	663	2834	Chr02	-	29583121	29585297	notsure	76.6
i2_LQ_Mix0_5d_c11855/f1p0/2603	12	1344	Chr00	-	21782752	21784084	MD00G1103300	50.9	1345	2617	Chr04	+	2082585	2429686	MD04G1020000,MD04G1018000,MD04G1019900,MD04G1019200	48.6
i2_LQ_Mix0_5d_c52924/f1p9/3144	1	675	Chr10	+	33314891	33315565	MD10G1236700	21.4	676	3147	Chr05	+	38745358	38748150	MD05G1256300	78.6
i2_HQ_Mix0_5d_c32086/f5p14/2226	1	1996	Chr09	+	2380579	2384267	MD09G1039000	89.5	1997	2231	Chr11	+	5545380	5545614	notsure	10.5
i3_HQ_Mix0_5d_c15656/f3p0/3291	1	1741	Chr05	+	9119212	9122674	MD05G1053800,MD05G1053600,MD05G1053700,MD05G1053500	52.9	1742	3292	Chr07	-	6926115	6927844	notsure	47.1
i1_HQ_Mix0_5d_c24291/f7p59/1642	1	688	Chr15	+	19759327	19763058	MD15G1240100	42	689	1640	Chr00	-	8779359	8781299	MD00G1047200	58
i2_HQ_Mix0_5d_c52809/f4p30/2925	1	2281	Chr17	-	28864359	28868686	MD17G1239400	78	2282	2925	Chr09	-	31568409	31569206	MD09G1246500	22
i1_LQ_Mix0_5d_c66984/f1p0/1896	1	555	Chr10	+	41211827	41212881	MD10G1334800	29.2	556	1899	Chr10	+	41025659	41027756	MD10G1333000	70.7
i2_HQ_Mix0_5d_c30546/f2p5/2549	1	2278	Chr06	+	34628060	34630336	MD06G1213500	89.4	2279	2548	Chr02	-	35602727	35602998	notsure	10.6
i3_HQ_Mix0_5d_c10968/f2p0/3742	1	572	Chr02	-	9959084	9959848	MD02G1122300	15.3	573	3745	Chr15	-	19427529	19449640	MD15G1236500,MD15G1236200,MD15G1236300	84.7
i2_LQ_Mix0_5d_c155518/f1p9/2305	4	1797	Chr10	-	35272973	35277452	MD10G1258700	77.8	1798	2307	Chr03	-	13964171	13964662	MD03G1137800	22.1
i3_LQ_Mix0_5d_c23977/f1p31/3143	1	568	Chr17	-	33614032	33614745	MD17G1274600	17.8	569	3193	Chr08	+	12185711	12874028	MD08G1134600,MD08G1130800,MD08G1134700,MD08G1130900,MD08G1133100,MD08G1129800,MD08G1131600,MD08G1131500,MD08G1132600,MD08G1130300,MD08G1132700,MD08G1133500,MD08G1135400,MD08G1134900,MD08G1131900,MD08G1134100,MD08G1134200,MD08G1133400,MD08G1132500,MD08G1130600,MD08G1133700,MD08G1134300,MD08G1131000,MD08G1134500,MD08G1132200,MD08G1135200,MD08G1132300,MD08G1130000	82.2
i2_LQ_Mix0_5d_c150573/f1p8/2266	1	413	Chr13	+	21572902	21573320	notsure	18.2	414	2268	Chr03	-	21717704	21724159	MD03G1164800	81.8
i2_LQ_Mix0_5d_c45602/f1p7/2781	1	735	Chr10	+	38730685	38731441	notsure	26.4	736	2779	Chr05	+	27743872	27951267	MD05G1147700,MD05G1147900,MD05G1147200,MD05G1148100,MD05G1147800,MD05G1147400,MD05G1146800	73.4
i3_HQ_Mix0_5d_c5112/f2p0/3526	1	2319	Chr10	+	23528567	23622041	MD10G1148700,MD10G1147700,MD10G1148300,MD10G1147300,MD10G1148000,MD10G1148500,MD10G1147800,MD10G1148600,MD10G1147900	65.7	2320	3527	Chr10	+	15866848	15868502	MD10G1098700	34.3
i2_LQ_Mix0_5d_c83773/f1p453/2167	1	1094	Chr16	+	38918366	38919459	MD16G1283000	50.6	1095	2162	Chr00	-	48263538	48264605	MD00G1202200	49.4
i2_LQ_Mix0_5d_c61758/f1p2/2842	1	1876	Chr16	+	3256205	3258081	notsure	65.8	1877	2851	Chr15	-	25858500	25859754	MD15G1284700	34.2
i2_LQ_Mix0_5d_c133567/f1p4/2417	23	608	Chr03	+	2474679	2476478	MD03G1030600	24	609	2442	Chr04	-	3829924	3832305	MD04G1034200	75.1
i1_LQ_Mix0_5d_c172111/f4p0/1904	1	526	Chr16	+	38918635	38919161	MD16G1283000	27.8	527	1891	Chr00	-	48263539	48427310	MD00G1202400,MD00G1202900,MD00G1202600,MD00G1202200,MD00G1202700,MD00G1202300,MD00G1202800	72.2
i2_HQ_Mix0_5d_c22717/f3p40/2180	1	353	Chr08	-	3657545	3658793	MD08G1047900	16.2	354	2178	Chr02	+	30073028	30074997	MD02G1249800	83.8
i2_LQ_Mix0_5d_c61324/f1p21/3019	1	433	Chr16	-	10820274	10820706	MD16G1140700	14.3	434	3019	Chr05	+	25780696	25827753	MD05G1131900,MD05G1132100,MD05G1132400,MD05G1132600,MD05G1132000	85.7
i1_LQ_Mix0_5d_c62937/f4p60/1306	2	1145	Chr08	-	3254769	3256816	MD08G1043100	87.4	1146	1309	Chr10	-	1594328	1594489	notsure	12.5
i2_LQ_Mix0_5d_c83736/f1p17/2320	1	1679	Chr15	+	2311519	2314803	MD15G1033000	71.9	1680	2336	Chr12	-	2912066	2912736	MD12G1026300	28.1
i1_LQ_Mix0_5d_c8508/f1p0/1597	4	327	Chr07	-	1001254	1002063	notsure	19.9	328	1626	Chr10	+	25020568	25028683	notsure	79.9
i5_LQ_Mix0_5d_c1745/f1p0/5337	4	2181	Chr16	-	13615551	13629698	MD16G1164500	40.7	2182	5342	Chr02	+	31550650	31554093	notsure	59.1
i2_LQ_Mix0_5d_c24726/f1p4/2141	1	525	Chr07	-	32216035	32219912	MD07G1254900	24.5	526	2144	Chr07	-	7929559	7931196	MD07G1081600	75.5
i1_LQ_Mix0_5d_c31456/f1p28/1268	1	1114	Chr16	+	38918353	38919465	MD16G1283000	87.9	1115	1268	Chr17	-	20008834	20008988	MD17G1176600	12.1
i2_LQ_Mix0_5d_c116003/f1p2/2345	1	1979	Chr04	-	19104425	19108521	MD04G1103800	84.1	1980	2352	Chr12	-	19874392	19874764	notsure	15.9
i2_HQ_Mix0_5d_c172983/f14p0/2646	1	509	Chr10	+	20486028	20486692	notsure	19.3	510	2643	Chr17	-	14584652	14598280	MD17G1154300	80.7
i1_LQ_Mix0_5d_c82927/f1p0/1838	1	1096	Chr02	+	2905668	2908422	MD02G1038200	58.3	1097	1881	Chr00	+	4453947	4454857	MD00G1025600	41.7
i1_LQ_Mix0_5d_c13261/f1p46/1091	1	571	Chr07	-	32216006	32219944	MD07G1254900	52.2	572	1094	Chr02	+	13252000	13252515	notsure	47.8
i1_HQ_Mix0_5d_c59302/f2p0/1825	4	589	Chr04	-	27303243	27305580	MD04G1182100	32.1	590	1825	Chr11	+	11848950	11853276	MD11G1131000	67.7
i3_LQ_Mix0_5d_c5551/f1p0/3326	7	1388	Chr14	-	28264501	28267442	MD14G1191600	41.4	1389	3335	Chr05	+	4306487	4314595	MD05G1027200	58.4
i2_LQ_Mix0_5d_c138210/f2p1/2701	1	614	Chr05	-	30856963	30857802	notsure	22.6	615	2713	Chr10	-	10855496	10857768	MD10G1076100	77.4
i2_LQ_Mix0_5d_c61715/f1p23/2325	4	372	Chr07	-	23939977	23940429	notsure	15.9	373	2324	Chr02	+	14043267	14073244	MD02G1164400,MD02G1164500,MD02G1164600,MD02G1164700	84
i2_LQ_Mix0_5d_c67317/f1p22/2406	1	302	Chr10	-	20600491	20600797	MD10G1126000	12.6	303	2406	Chr14	-	406061	410457	MD14G1003200	87.4
i1_LQ_Mix0_5d_c159513/f1p0/1975	1	226	Chr15	-	9138553	9138778	MD15G1125600	11.4	227	1976	Chr00	-	31680983	31682730	MD00G1144700	88.6
i1_LQ_Mix0_5d_c160334/f1p0/1959	1	637	Chr15	+	19697352	19699108	notsure	32.5	638	1960	Chr14	+	32150226	32151878	notsure	67.5
i2_LQ_Mix0_5d_c95582/f1p6/2257	1	1947	Chr15	+	41327096	41347018	MD15G1348800,MD15G1348900	85.8	1948	2270	Chr09	-	22419165	22419487	notsure	14.2
i1_LQ_Mix0_5d_c69597/f1p0/1169	1	918	Chr14	-	5845837	5849969	MD14G1056600	78.2	919	1173	Chr12	+	30226267	30226521	notsure	21.7
i1_LQ_Mix0_5d_c38737/f1p0/1159	1	807	Chr03	-	9517859	9521601	MD03G1109400	69.6	808	1159	Chr10	-	13932452	13932803	notsure	30.4
i2_LQ_Mix0_5d_c97703/f1p6/2544	1	1159	Chr13	-	35412709	35414656	MD13G1268900	44.7	1160	2590	Chr00	-	5736407	5738935	MD00G1032700	55.3
i2_LQ_Mix0_5d_c132075/f1p7/3067	1	582	Chr11	-	35365412	35367090	MD11G1243500	19.3	583	3011	Chr11	+	33166362	33244623	MD11G1228300,MD11G1228500,MD11G1227900,MD11G1228700,MD11G1228400	80.7
i2_LQ_Mix0_5d_c83041/f1p5/2669	1	533	Chr03	-	24844313	24846364	MD03G1181100,MD03G1181200	20	534	2664	Chr11	-	28834780	28838318	MD11G1199700,MD11G1199800	79.8
i1_LQ_Mix0_5d_c79320/f1p0/1452	15	1009	Chr13	+	15809813	15811059	MD13G1185700	67.5	1010	1473	Chr16	+	16105058	16105521	notsure	31.5
i1_LQ_Mix0_5d_c182145/f1p0/1034	1	834	Chr11	-	1782664	1792809	MD11G1020500	80.7	835	1034	Chr08	+	5402491	5402692	notsure	19.3
i2_LQ_Mix0_5d_c113715/f1p0/2711	1	2433	Chr08	+	27298982	27302565	notsure	89.6	2434	2716	Chr07	-	26831278	26831572	MD07G1187700	10.4
i1_LQ_Mix0_5d_c12243/f1p0/1742	13	198	Chr07	-	31452289	31479670	MD07G1245100,MD07G1244800,MD07G1244600,MD07G1244700,MD07G1245000	10.7	199	1746	Chr07	+	20551273	20559380	MD07G1142100	88.7
i3_LQ_Mix0_5d_c16868/f1p157/3723	1	3337	Chr00	-	23077587	23085383	MD00G1110400	89.5	3338	3729	Chr16	+	12568078	12568471	MD16G1157000	10.5
i2_LQ_Mix0_5d_c49197/f1p0/2529	1	1007	Chr08	-	3402729	3446318	MD08G1044700,MD08G1045100,MD08G1044900,MD08G1045300	39.8	1008	2530	Chr15	-	4148541	4150485	MD15G1061900	60.2
i1_LQ_Mix0_5d_c183750/f1p0/1019	3	932	Chr15	-	24206032	24206970	notsure	89	933	1045	Chr11	+	12575560	12575672	notsure	10.8
i2_HQ_Mix0_5d_c116276/f2p2/2826	1	2291	Chr02	-	26216061	26231583	MD02G1223800,MD02G1223900	80.9	2292	2831	Chr13	-	10639496	10641073	MD13G1138300	19.1
i1_LQ_Mix0_5d_c138421/f1p0/1987	1	1411	Chr02	-	26216061	26231590	MD02G1223800,MD02G1223900	72.5	1412	1946	Chr13	-	10639501	10641073	MD13G1138300	27.5
i1_LQ_Mix0_5d_c17506/f1p24/1657	1	1279	Chr05	+	17203341	17206866	MD05G1082300	75	1280	1705	Chr05	+	22087507	22200133	MD05G1107900,MD05G1107700,MD05G1107500,MD05G1107600,MD05G1108000	25
i2_HQ_Mix0_5d_c145946/f5p6/2110	3	331	Chr16	-	25182699	25183805	MD16G1238600	15.6	332	2111	Chr01	+	8894613	8908605	MD01G1022300	84.3
i2_LQ_Mix0_5d_c116802/f1p1/2789	1	795	Chr15	-	4713378	4715153	MD15G1067900	27.6	796	2878	Chr06	+	27445201	27447789	notsure	72.4
i2_LQ_Mix0_5d_c155323/f1p23/2460	19	1859	Chr09	-	1418046	1460784	MD09G1024000,MD09G1024100,MD09G1024200,MD09G1023800	75.4	1860	2443	Chr09	+	2890200	2891421	MD09G1044600	23.9
i1_LQ_Mix0_5d_c48072/f1p1/1331	1	721	Chr12	+	25905553	25907000	notsure	54.1	722	1333	Chr10	+	15775070	15775676	notsure	45.9
i2_LQ_Mix0_5d_c130572/f1p2/2315	1	533	Chr11	-	38066922	38067678	MD11G1265400	22.9	534	2325	Chr03	-	35895192	35896991	MD03G1276500	77.1
i3_LQ_Mix0_5d_c5308/f1p0/3472	11	2668	Chr09	-	19803331	20047588	MD09G1207100,MD09G1206700,MD09G1208000,MD09G1207600,MD09G1208400,MD09G1207700,MD09G1208700,MD09G1207400,MD09G1208200,MD09G1207800	76.5	2669	3474	Chr17	-	22668391	22794052	MD17G1190800,MD17G1190300,MD17G1190200,MD17G1190400	23.2
i1_LQ_Mix0_5d_c77759/f1p0/1957	1	1469	Chr06	-	27941704	27945696	MD06G1134900	74.9	1470	1962	Chr10	+	34217972	34218621	MD10G1249600	25.1
i2_LQ_Mix0_5d_c119580/f1p1/2137	3	250	Chr12	-	3803860	3804109	notsure	11.3	251	2192	Chr16	-	24939751	24952349	MD16G1237000	88.6
i1_HQ_Mix0_5d_c123251/f2p0/1043	1	248	Chr09	+	25977590	25977940	notsure	23.8	249	1033	Chr01	+	30334466	30344112	MD01G1209200,MD01G1209100	75.2
i2_HQ_Mix0_5d_c135332/f2p1/2313	1	1733	Chr00	+	51214529	51219865	MD00G1214400,MD00G1214500	74.6	1734	2322	Chr07	+	2888418	2889006	MD07G1035200	25.4
i2_LQ_Mix0_5d_c60966/f1p10/2419	1	361	Chr06	-	25707062	25707421	notsure	14.9	362	2417	Chr14	-	20099553	20103575	MD14G1126300,MD14G1126400	84.9
i1_LQ_Mix0_5d_c114130/f1p0/1652	1	1335	Chr16	+	38918104	38919465	MD16G1283000	79.7	1336	1676	Chr00	-	48264252	48264599	MD00G1202200	20.3
i1_HQ_Mix0_5d_c93880/f2p0/1519	8	526	Chr00	+	1416861	1417377	MD00G1011700	34.1	527	1518	Chr15	-	25513833	25566974	MD15G1282500,MD15G1282700,MD15G1282600	65.3
i1_LQ_Mix0_5d_c50186/f1p1/1707	1	375	Chr15	-	39090351	39090729	MD15G1341900	21.9	376	1713	Chr11	+	5530338	5557513	MD11G1064100,MD11G1064500,MD11G1064200,MD11G1064600,MD11G1064300,MD11G1064000	78.1
i2_LQ_Mix0_5d_c134506/f1p2/2140	1	249	Chr03	+	33362832	33363080	notsure	11.6	250	2151	Chr11	+	36221175	36226466	MD11G1250000	88.4
i2_LQ_Mix0_5d_c118111/f1p15/2557	1	1013	Chr15	+	2598907	2600554	MD15G1037400	39.6	1014	2558	Chr14	+	5607886	5609430	MD14G1055100	60.4
i2_LQ_Mix0_5d_c67451/f1p1/2808	1	2538	Chr08	+	27298972	27302565	notsure	90	2539	2819	Chr07	-	26831280	26831572	MD07G1187700	10
i2_LQ_Mix0_5d_c158013/f1p45/2133	1	1061	Chr16	+	38918399	38919459	MD16G1283000	49.8	1062	2129	Chr00	-	48263538	48264605	MD00G1202200	50.2
i1_LQ_Mix0_5d_c82798/f1p0/1730	1	1521	Chr12	+	407025	411064	MD12G1002400	87.7	1522	1735	Chr10	-	27061926	27062175	notsure	12.3
i2_LQ_Mix0_5d_c149662/f1p0/2807	1	2386	Chr01	+	8009879	8012831	MD01G1018800	80.4	2387	2968	Chr11	+	21888696	21890790	MD11G1180100	19.6
i2_LQ_Mix0_5d_c46126/f1p3/2108	1	1590	Chr00	-	36870126	36878517	notsure	75.4	1591	2108	Chr10	-	21561546	21565150	MD10G1133700	24.6
i1_LQ_Mix0_5d_c76412/f1p0/1380	1	1198	Chr07	-	33166748	33170152	MD07G1262400	86.7	1199	1382	Chr08	+	11894197	11894380	MD08G1126500	13.3
i2_LQ_Mix0_5d_c151061/f1p4/2693	1	320	Chr00	-	47804602	47804921	MD00G1201600	11.9	321	2696	Chr15	+	44958683	44963406	MD15G1369900	88.1
i2_LQ_Mix0_5d_c77820/f1p0/2268	1	1754	Chr07	-	1306604	1308551	MD07G1014400	75.5	1755	2322	Chr00	-	21548405	21549098	MD00G1102200	24.5
i2_LQ_Mix0_5d_c32492/f1p7/2786	1	577	Chr03	+	37044283	37045608	MD03G1294100	20.7	578	2791	Chr00	-	42103485	42107260	MD00G1179500	79.3
i2_HQ_Mix0_5d_c172607/f15p19/2538	1	1838	Chr09	-	11049290	11072102	MD09G1141500,MD09G1141400,MD09G1141300,MD09G1141700,MD09G1141200,MD09G1141600	72.3	1839	2541	Chr08	-	2351065	2351769	notsure	27.7
i2_LQ_Mix0_5d_c37395/f1p29/3037	1	2283	Chr17	-	28864359	28868688	MD17G1239400	75.1	2284	3040	Chr09	-	31568307	31569206	MD09G1246500	24.9
i2_LQ_Mix0_5d_c33371/f1p5/2441	25	2197	Chr05	-	42294474	42300841	MD05G1291500	89.1	2198	2440	Chr10	-	36042155	36042397	MD10G1267500	10
i1_LQ_Mix0_5d_c160498/f1p0/1996	1	388	Chr11	-	15477575	15477961	notsure	19.5	389	1993	Chr08	-	1610470	1614684	MD08G1022200	80.5
i2_LQ_Mix0_5d_c114795/f1p20/3057	1	947	Chr10	-	20612652	20613611	MD10G1126100	31	948	3056	Chr14	-	406056	410457	MD14G1003200	69
i2_LQ_Mix0_5d_c18602/f1p1/2303	1	1253	Chr12	-	32545632	32547192	MD12G1258900	54.1	1254	2317	Chr04	-	31879465	31880761	MD04G1242100,MD04G1242000	45.9
i2_LQ_Mix0_5d_c72797/f1p6/2050	2	1739	Chr09	+	18098000	18103321	MD09G1198500	84.7	1740	2052	Chr11	-	3631234	3631542	notsure	15.3
i1_LQ_Mix0_5d_c9729/f1p0/1938	1	1090	Chr06	+	29828820	29830918	MD06G1155800	56.1	1091	1943	Chr06	+	29640795	29641647	MD06G1153300	43.9
i1_LQ_Mix0_5d_c161211/f1p0/1885	2	1385	Chr05	+	36472619	36523958	MD05G1231400,MD05G1231900,MD05G1232200,MD05G1231700,MD05G1231300,MD05G1231600,MD05G1231200,MD05G1231500,MD05G1232100	74.2	1386	1865	Chr10	-	30027031	30027692	MD10G1202600	25.7
i2_LQ_Mix0_5d_c82224/f1p3/3029	1	546	Chr13	+	25299562	25300107	notsure	17.7	547	3084	Chr10	-	39297612	39300733	MD10G1307800	82.3
i2_LQ_Mix0_5d_c96219/f1p7/2899	1	2127	Chr15	-	2838809	2844456	MD15G1040300,MD15G1040200,MD15G1040400	73.1	2128	2908	Chr08	+	4460075	4461425	MD08G1057200	26.9
i0_LQ_Mix0_5d_c7642/f1p2/990	1	158	Chr10	+	38310851	38311008	notsure	15.2	159	1038	Chr00	-	19947403	19948284	MD00G1096000	84.8
i1_LQ_Mix0_5d_c71716/f1p0/1151	1	796	Chr17	+	1144420	1146753	MD17G1013600	69.2	797	1151	Chr14	+	23757394	23757748	notsure	30.8
i2_LQ_Mix0_5d_c61918/f1p33/2244	1	1480	Chr15	+	19378250	19380246	MD15G1235700	65.9	1481	2246	Chr03	-	2907523	2908288	MD03G1036600	34.1
i2_LQ_Mix0_5d_c81981/f1p0/2078	1	256	Chr08	+	30292437	30292690	MD08G1235300	12.3	257	2070	Chr15	+	52715488	52721283	MD15G1426600	87.3
i1_LQ_Mix0_5d_c159014/f1p0/1507	1	1318	Chr02	-	10943912	10945695	MD02G1134800	87.3	1319	1510	Chr09	-	10948268	10948459	notsure	12.7
i1_LQ_Mix0_5d_c134557/f1p20/1828	1	1268	Chr15	+	2311476	2314803	MD15G1033000	69.2	1269	1832	Chr08	+	25430593	25431376	notsure	30.8
i1_LQ_Mix0_5d_c119871/f1p6/1300	1	641	Chr13	-	7709067	7709707	notsure	49.2	642	1303	Chr17	-	5614351	5615286	notsure	50.8
i2_LQ_Mix0_5d_c174854/f1p4/2254	1	473	Chr14	+	14508454	14508926	notsure	21	474	2254	Chr12	-	3069207	3073713	MD12G1027300	79
i2_LQ_Mix0_5d_c51029/f1p7/2775	3	567	Chr03	+	37044295	37045608	MD03G1294100	20.3	568	2777	Chr00	-	42103489	42107260	MD00G1179500	79.6
i2_LQ_Mix0_5d_c161601/f1p23/2055	1	1416	Chr15	+	50524956	50526374	notsure	69	1417	2052	Chr13	-	20176104	20176910	MD13G1214000	31
i1_LQ_Mix0_5d_c183486/f1p0/1035	1	673	Chr15	+	33011815	33012928	MD15G1319200	62.1	674	1078	Chr16	-	19666743	19976618	MD16G1210700,MD16G1211100,MD16G1211000,MD16G1209400,MD16G1208800,MD16G1210000,MD16G1209000,MD16G1210500,MD16G1209500,MD16G1210800,MD16G1209100,MD16G1210900,MD16G1209200	37.4
i3_LQ_Mix0_5d_c20357/f1p3/3436	1	1250	Chr14	-	28264501	28267520	MD14G1191600	36.5	1251	3421	Chr05	+	4306487	4314816	MD05G1027200	63.5
i2_LQ_Mix0_5d_c64727/f1p6/2124	4	1481	Chr06	-	27941704	27945692	MD06G1134900	69.5	1482	2128	Chr08	-	14311295	14311941	notsure	30.4
i2_LQ_Mix0_5d_c37729/f1p12/2768	1	1733	Chr09	-	34206200	34310526	MD09G1268700,MD09G1268400,MD09G1268300,MD09G1267900,MD09G1267800	62.4	1734	2776	Chr06	-	27935118	27939990	MD06G1134900	37.6
i3_LQ_Mix0_5d_c17766/f1p0/4051	2	642	Chr16	+	11411995	11414851	MD16G1146200	15.7	643	4077	Chr05	-	44770812	44775265	MD05G1320400,MD05G1320300	84.2
i2_LQ_Mix0_5d_c41232/f1p4/2063	1	245	Chr15	-	32219346	32219590	MD15G1315500	11.9	246	2067	Chr01	+	13000976	13006667	MD01G1037400	88.1
i2_LQ_Mix0_5d_c62365/f1p4/2617	1	436	Chr16	-	35040613	35041049	MD16G1270200	16.6	437	2622	Chr02	-	30172394	30175270	notsure	83.3
i2_LQ_Mix0_5d_c154268/f1p0/2120	1	279	Chr15	+	37213644	37213931	MD15G1334600	13.2	280	2112	Chr02	-	10329364	10331155	MD02G1127600	86.8
i1_LQ_Mix0_5d_c36000/f2p0/1564	2	1286	Chr17	+	27079848	27081127	MD17G1222400	81.9	1287	1569	Chr01	+	26087312	26099304	notsure	18
i1_LQ_Mix0_5d_c157335/f1p2/1997	1	849	Chr03	-	3380362	3381210	MD03G1043100	42.6	850	1991	Chr11	-	4007672	4009837	MD11G1046100	57.4
i2_LQ_Mix0_5d_c133096/f1p5/2436	11	311	Chr08	+	19705800	19706100	notsure	12.3	312	2452	Chr13	+	26843586	26845698	MD13G1252100	87.3
i2_LQ_Mix0_5d_c3598/f1p11/2869	1	2066	Chr01	-	9004195	9007922	MD01G1022700	71.6	2067	2884	Chr15	+	36319957	36320891	MD15G1329800	28.3
i2_LQ_Mix0_5d_c65680/f1p7/2902	1	1374	Chr07	+	13705264	13706841	MD07G1114300	47.2	1375	2909	Chr02	-	22196261	22197948	MD02G1211000	52.8
i0_LQ_Mix0_5d_c1610/f2p0/572	1	97	Chr16	+	38917400	38917497	MD16G1283000	17	98	569	Chr13	+	23613390	23615409	MD13G1234900	83
i3_LQ_Mix0_5d_c17938/f1p4/3348	1	2760	Chr10	+	15863758	15867470	MD10G1098700	81.5	2761	3384	Chr10	+	23507237	23539475	MD10G1147200,MD10G1147300	18.4
i1_LQ_Mix0_5d_c118049/f1p0/1448	1	498	Chr15	+	19759332	19761177	MD15G1240100	34.3	499	1450	Chr00	-	8779359	8781299	MD00G1047200	65.7
i2_LQ_Mix0_5d_c37758/f1p23/2641	1	1939	Chr05	+	26501196	26523567	MD05G1136900,MD05G1137000	73.4	1940	2643	Chr05	+	26370074	26370776	MD05G1135500	26.6
i3_LQ_Mix0_5d_c32021/f1p0/3753	1	2805	Chr01	-	9004195	9007890	MD01G1022700	74.9	2806	3739	Chr15	+	36319957	36321005	MD15G1329800	24.9
i3_LQ_Mix0_5d_c5128/f1p4/3389	4	766	Chr00	-	13318262	13327195	notsure	22.5	767	3390	Chr04	+	1563036	1571315	MD04G1013700	77.4
i3_LQ_Mix0_5d_c11435/f1p0/3787	4	522	Chr11	-	10608268	10608756	MD11G1117100	13.7	523	3791	Chr03	-	8829451	8836756	MD03G1103300	86.2
i1_LQ_Mix0_5d_c161818/f1p0/1518	1	567	Chr15	+	19759319	19761177	MD15G1240100	37.3	568	1519	Chr00	-	8779359	8781299	MD00G1047200	62.7
i3_LQ_Mix0_5d_c30821/f1p11/3305	3	1048	Chr16	+	19844460	19845518	MD16G1209800	31.6	1049	3306	Chr08	-	28069443	28072247	MD08G1218200	68.3
i2_LQ_Mix0_5d_c22856/f1p51/2359	1	1406	Chr05	+	47761935	47766027	MD05G1362500	59.8	1407	2352	Chr02	+	6559367	6560312	MD02G1084000	40.2
i2_LQ_Mix0_5d_c179306/f1p19/2605	1	308	Chr00	-	10021802	10022170	MD00G1053600	11.8	309	2605	Chr17	-	14584731	14739528	MD17G1154300,MD17G1154500,MD17G1154400	88.2
i2_LQ_Mix0_5d_c142508/f1p2/2025	1	1508	Chr15	+	2352928	2357260	MD15G1033700,MD15G1033600	74.2	1509	2026	Chr05	+	28873228	28873745	notsure	25.5
i2_LQ_Mix0_5d_c50089/f1p1/2710	1	341	Chr06	-	36527482	36527894	MD06G1234100	12.3	342	2762	Chr14	-	31967644	31970095	MD14G1240800	87.7
i2_LQ_Mix0_5d_c149945/f1p442/2207	22	1133	Chr13	-	8119175	8121407	notsure	50.4	1134	2207	Chr16	+	7802785	7805043	MD16G1111100	48.7
i1_LQ_Mix0_5d_c61094/f1p3/1466	1	875	Chr07	+	20133895	20168049	MD07G1138400,MD07G1138500,MD07G1138800,MD07G1138900,MD07G1138200	59.3	876	1475	Chr01	-	16307876	16308635	MD01G1059300	40.7
i2_HQ_Mix0_5d_c31832/f5p13/2194	1	688	Chr05	+	36261012	36261686	notsure	31.3	689	2196	Chr00	+	16037254	16045691	MD00G1080100	68.7
i3_HQ_Mix0_5d_c36846/f53p20/3092	1	2290	Chr17	-	28864359	28868695	MD17G1239400	74.1	2291	3089	Chr09	-	31568266	31569206	MD09G1246500	25.8
i2_HQ_Mix0_5d_c23780/f2p6/2848	1	1373	Chr11	-	35365412	35367093	MD11G1243500	48.2	1374	2850	Chr11	+	33166362	33244549	MD11G1228300,MD11G1228500,MD11G1227900,MD11G1228700,MD11G1228400	51.8
i2_LQ_Mix0_5d_c95352/f1p18/2290	1	1087	Chr14	-	6479007	6509685	MD14G1061500,MD14G1061700,MD14G1061600	47.4	1088	2291	Chr12	-	9503831	9505035	notsure	52.6
i2_LQ_Mix0_5d_c130659/f1p2/2665	1	2344	Chr00	+	20513087	20519209	MD00G1098500	87.8	2345	2669	Chr04	+	30569580	30569904	notsure	12.2
i1_LQ_Mix0_5d_c31154/f1p8/1408	1	574	Chr05	-	26991923	26992514	notsure	40.7	575	1410	Chr12	-	1671639	1673081	MD12G1017400	59.3
i1_LQ_Mix0_5d_c54077/f1p0/1171	1	726	Chr02	-	501341	503251	MD02G1008000	61.9	727	1173	Chr06	+	607168	607786	MD06G1005600	38.1
i2_LQ_Mix0_5d_c136906/f1p9/2264	1	328	Chr05	+	1882542	1883160	MD05G1008800	14.5	329	2262	Chr10	-	1183589	1189360	MD10G1007700	85.5
i1_LQ_Mix0_5d_c69881/f1p0/1172	1	1019	Chr16	+	38918446	38919465	MD16G1283000	86.9	1020	1173	Chr17	-	20008834	20008988	MD17G1176600	13.1
i2_HQ_Mix0_5d_c21174/f4p3/2505	1	269	Chr12	-	3803860	3804301	notsure	10.7	270	2506	Chr16	-	24939741	24952349	MD16G1237000	89.3
i3_LQ_Mix0_5d_c28912/f1p0/3524	1	702	Chr05	-	45879802	45880657	notsure	19.8	703	3546	Chr16	-	16112607	16116033	MD16G1186700	80.2
i1_HQ_Mix0_5d_c170247/f4p0/1409	1	1108	Chr11	+	6938072	6939341	notsure	78.6	1109	1409	Chr03	+	6265213	6265513	MD03G1076900	21.4
i2_LQ_Mix0_5d_c53269/f1p306/2369	1	1584	Chr04	-	1278260	1281106	MD04G1011300	66.8	1585	2370	Chr04	-	25021181	25022357	MD04G1159900	33.2
i3_HQ_Mix0_5d_c26259/f3p0/3169	1	441	Chr07	-	23939977	23940501	notsure	13.9	442	3170	Chr02	+	14043267	14048243	MD02G1164400,MD02G1164500	86.1
i1_LQ_Mix0_5d_c161190/f1p0/1551	1	601	Chr15	+	19759319	19763058	MD15G1240100	38.7	602	1553	Chr00	-	8779359	8781299	MD00G1047200	61.3
i2_LQ_Mix0_5d_c131278/f1p10/2706	3	2136	Chr09	+	18098003	18103321	MD09G1198500	78.3	2137	2724	Chr02	+	36287879	36288466	notsure	21.6
i2_LQ_Mix0_5d_c115830/f1p0/2418	1	1376	Chr12	-	28872707	28874705	MD12G1209800	56.7	1377	2425	Chr11	-	15699010	15700060	notsure	43.3
i3_LQ_Mix0_5d_c4295/f1p0/3836	34	624	Chr03	+	4250826	4251396	MD03G1053200	15.4	625	3848	Chr11	+	4679620	4683205	MD11G1054900	83.8
i2_LQ_Mix0_5d_c56150/f1p0/2030	1	1730	Chr02	+	37013249	37016351	MD02G1315300	85.2	1731	2031	Chr13	-	35965781	35966081	notsure	14.8
i2_LQ_Mix0_5d_c88284/f1p3/2148	1	254	Chr04	+	25110356	25110607	notsure	11.7	255	2180	Chr00	-	21511895	21514399	MD00G1101700	88.3
i1_LQ_Mix0_5d_c3545/f2p5/1875	1	1494	Chr07	+	6666869	6668662	MD07G1070500	79.5	1495	1879	Chr02	-	15483080	15483463	notsure	20.5
i2_LQ_Mix0_5d_c112854/f1p9/3072	4	567	Chr16	-	8663950	8665014	MD16G1120800	18.4	568	3067	Chr13	-	8869503	8872002	MD13G1120800	81.5
i2_HQ_Mix0_5d_c121196/f3p1/2078	1	1014	Chr16	+	38918444	38919459	MD16G1283000	48.8	1015	2077	Chr00	-	48263542	48264605	MD00G1202200	51.1
i1_LQ_Mix0_5d_c19298/f3p0/1733	8	224	Chr12	-	5623464	5624120	MD12G1049100	12.5	225	1733	Chr14	-	4593325	4665547	MD14G1048000,MD14G1049100,MD14G1049000,MD14G1048500,MD14G1048200	86.9
i2_LQ_Mix0_5d_c26843/f1p4/2015	7	1762	Chr02	+	8717630	8722363	MD02G1107900	89.1	1763	1971	Chr15	+	18487662	18487904	MD15G1227400	10.6
i1_LQ_Mix0_5d_c140547/f1p0/1500	13	216	Chr15	+	32858219	32858404	notsure	13.2	217	1548	Chr11	-	36910890	36912227	notsure	86
i3_LQ_Mix0_5d_c19734/f1p16/4047	1	1215	Chr03	-	10560888	10578601	MD03G1117500,MD03G1117400	30.4	1216	4001	Chr01	+	11874176	11876970	notsure	69.6
i2_LQ_Mix0_5d_c101313/f1p10/2957	1	1230	Chr13	+	21168228	21170873	MD13G1219100	41.6	1231	2959	Chr10	-	6150693	6154766	MD10G1046000	58.4
i2_LQ_Mix0_5d_c80795/f1p1/2199	1	1343	Chr13	-	17415811	17417147	MD13G1197700	60.9	1344	2207	Chr12	-	30342247	30343109	notsure	39.1
i2_LQ_Mix0_5d_c152271/f1p7/2583	6	777	Chr09	-	9321271	9322795	MD09G1120400	30	778	2576	Chr05	+	45700967	45706514	MD05G1333900,MD05G1333800	69.8
i3_LQ_Mix0_5d_c15617/f2p0/3589	1	3225	Chr12	+	31560953	31565011	MD12G1245100	89.6	3226	3598	Chr06	-	29365263	29365637	notsure	10.4
i2_LQ_Mix0_5d_c7052/f1p5/2530	2	890	Chr15	+	8800253	8801957	MD15G1122600	35.1	891	2530	Chr09	-	31766966	31768596	notsure	64.8
i3_HQ_Mix0_5d_c36329/f48p2/3324	1	441	Chr07	-	23939977	23940499	notsure	13.3	442	3327	Chr02	+	14043267	14048397	MD02G1164400,MD02G1164500	86.7
i3_LQ_Mix0_5d_c20529/f1p0/3430	2	2042	Chr06	+	34628292	34630332	MD06G1213500	59.3	2043	3440	Chr14	-	17090583	17092075	notsure	40.6
i2_LQ_Mix0_5d_c65405/f1p10/2216	1	912	Chr02	+	228071	228970	MD02G1002900	41.1	913	2218	Chr15	+	10871868	10875227	MD15G1146100	58.9
i2_LQ_Mix0_5d_c65413/f1p10/2528	1	733	Chr02	-	8206730	8208766	MD02G1102300	29	734	2529	Chr15	-	18180516	18184097	MD15G1223800	71
i3_HQ_Mix0_5d_c37163/f6p14/3187	1	503	Chr03	+	33836343	33836845	MD03G1250300	15.8	504	3188	Chr11	+	38604139	38611155	MD11G1270400	84.2
i0_LQ_Mix0_5d_c8596/f1p0/920	1	222	Chr05	+	9122453	9122674	MD05G1053800	24.4	223	908	Chr12	+	5351247	5352889	notsure	75.6
i2_LQ_Mix0_5d_c38010/f1p24/3089	15	2751	Chr15	-	50737315	50743802	MD15G1407100	88.3	2752	3098	Chr08	-	28085191	28085538	MD08G1218500	11.2
i1_LQ_Mix0_5d_c5055/f1p1/1989	3	1412	Chr05	+	36472594	36523958	MD05G1231400,MD05G1231900,MD05G1232200,MD05G1231700,MD05G1231300,MD05G1231600,MD05G1231200,MD05G1231500,MD05G1232100	71.7	1413	1953	Chr10	-	30027015	30027692	MD10G1202600	27.5
i4_LQ_Mix0_5d_c8646/f1p15/4701	1	4209	Chr06	+	709001	713698	MD06G1006800	89.8	4210	4685	Chr16	-	10745178	10745653	MD16G1139600	10.2
i1_LQ_Mix0_5d_c43681/f1p0/1890	1	795	Chr16	+	38918635	38919435	MD16G1283000	42.2	796	1883	Chr00	-	48263537	48274786	MD00G1202200	57.8
i3_LQ_Mix0_5d_c38037/f1p7/3042	1	426	Chr07	-	23939975	23940483	notsure	14	427	3048	Chr02	+	14043472	14048352	MD02G1164400,MD02G1164500	86
i2_LQ_Mix0_5d_c3829/f1p1/2616	1	934	Chr17	-	13097141	13098076	MD17G1145000	35.7	935	2615	Chr14	+	20327214	20331996	MD14G1127500,MD14G1127600	64.3
i1_HQ_Mix0_5d_c9600/f2p0/1918	1	1728	Chr14	-	4468797	4476373	MD14G1046900,MD14G1047000	90	1729	1921	Chr00	+	25217289	25217481	notsure	10
i2_HQ_Mix0_5d_c8263/f2p35/2218	1	595	Chr02	+	30525394	30539901	MD02G1253800,MD02G1253700	26.8	596	2220	Chr02	+	30073188	30075020	MD02G1249800	73.2
i1_LQ_Mix0_5d_c78258/f1p0/1603	1	877	Chr01	+	26313764	26315059	MD01G1155000	51.9	878	1678	Chr15	-	9836327	9838798	MD15G1135100	47.4
i2_LQ_Mix0_5d_c3372/f1p3/2953	1	1839	Chr13	-	38739663	38744845	MD13G1277900	62.1	1840	2961	Chr00	-	51397147	51399334	MD00G1214800	37.9
i3_LQ_Mix0_5d_c13313/f1p0/3034	31	769	Chr03	-	36630931	36632279	notsure	24.3	770	3035	Chr12	-	7860669	7871211	MD12G1066600	74.7
i2_LQ_Mix0_5d_c68276/f1p10/2913	15	2080	Chr01	-	9004195	9007922	MD01G1022700	71.2	2081	2898	Chr15	+	36319957	36320891	MD15G1329800	28.2
i2_LQ_Mix0_5d_c142877/f1p20/2046	1	1630	Chr09	-	11049290	11071891	MD09G1141500,MD09G1141400,MD09G1141300,MD09G1141700,MD09G1141200,MD09G1141600	79.4	1631	2053	Chr08	-	2351346	2351769	notsure	20.6
i3_LQ_Mix0_5d_c36909/f2p0/3140	5	2783	Chr11	+	38291810	38452762	MD11G1268600,MD11G1267900,MD11G1268200,MD11G1268300,MD11G1268400,MD11G1267800,MD11G1268500,MD11G1268100,MD11G1267700	88.4	2784	3142	Chr01	-	24804563	24805789	notsure	11.4
i2_LQ_Mix0_5d_c33204/f1p22/2386	1	884	Chr03	+	6287473	6291916	MD03G1077500	37.2	885	2379	Chr16	-	14077125	14078620	notsure	62.8
i2_LQ_Mix0_5d_c152103/f1p9/2697	1	682	Chr05	+	36261019	36261686	notsure	25.3	683	2698	Chr00	+	16037254	16045696	MD00G1080100	74.7
i3_LQ_Mix0_5d_c11714/f1p0/3326	1	2139	Chr09	+	18098001	18103321	MD09G1198500	64	2140	3343	Chr02	+	36287879	36289082	notsure	36
i2_LQ_Mix0_5d_c118074/f1p2/2372	1	483	Chr16	-	626067	626872	MD16G1008300	20.3	484	2383	Chr15	-	7356072	7360202	MD15G1105000,MD15G1104800	79.7
i1_LQ_Mix0_5d_c94099/f1p0/2028	1	1471	Chr17	+	5373303	5375603	MD17G1066500	72.5	1472	2027	Chr09	+	5354043	5354564	MD09G1075800	27.4
i3_HQ_Mix0_5d_c8975/f3p0/3614	6	3223	Chr05	-	42679538	42686865	MD05G1294300,MD05G1294400	88.9	3224	3612	Chr10	-	36446685	36447077	MD10G1273000	10.8
i2_HQ_Mix0_5d_c29866/f3p0/2554	1	357	Chr07	+	22676975	22677677	MD07G1155800	14	358	2555	Chr09	-	34899759	35012229	MD09G1273300,MD09G1272800,MD09G1273200,MD09G1272700,MD09G1273800,MD09G1273100,MD09G1273500,MD09G1273000,MD09G1273400,MD09G1273700	86
i2_LQ_Mix0_5d_c117760/f1p1/2268	1	1616	Chr12	-	31632177	31635107	MD12G1246100	71.3	1617	2268	Chr12	-	1968868	1969520	notsure	28.7
i2_LQ_Mix0_5d_c128292/f17p0/2666	1	306	Chr00	-	10021802	10022168	MD00G1053600	11.5	307	2666	Chr17	-	14584672	14739528	MD17G1154300,MD17G1154500,MD17G1154400	88.5
i2_LQ_Mix0_5d_c67142/f1p16/2460	1	1083	Chr10	-	29806394	29808077	MD10G1199900	43.9	1084	2467	Chr05	-	35755432	35763740	MD05G1225000	56.1
i2_LQ_Mix0_5d_c31322/f1p10/2988	1	2079	Chr01	-	9004195	9007936	MD01G1022700	69.4	2080	2992	Chr15	+	36319957	36320987	MD15G1329800	30.5
i1_LQ_Mix0_5d_c105664/f3p0/1888	1	824	Chr16	+	38918635	38919459	MD16G1283000	43.6	825	1891	Chr00	-	48263538	48264605	MD00G1202200	56.4
i2_LQ_Mix0_5d_c150126/f1p4/2573	5	1875	Chr17	+	11339278	11341192	MD17G1129000	72.5	1876	2582	Chr14	+	6863361	7109366	MD14G1065800,MD14G1065200	27.4
i3_LQ_Mix0_5d_c21596/f1p1/3225	1	1623	Chr00	-	15358968	15362170	MD00G1076400	49.5	1624	3276	Chr12	+	25280055	25336057	MD12G1173200,MD12G1172400,MD12G1172500,MD12G1172900	50.5
i2_HQ_Mix0_5d_c94859/f2p10/2248	1	1428	Chr08	+	27491130	27492982	MD08G1211400,MD08G1211300	63.4	1429	2251	Chr15	+	49375461	49376679	MD15G1394400	36.6
i2_LQ_Mix0_5d_c38332/f1p46/2509	4	318	Chr02	-	32032639	32034171	MD02G1266200	12.5	319	2511	Chr07	+	4969683	4971880	MD07G1053800	87.3
i3_LQ_Mix0_5d_c29236/f1p0/3974	1	3518	Chr11	+	2794105	2802578	notsure	88.7	3519	3967	Chr03	-	18989157	18989605	notsure	11.3
i1_LQ_Mix0_5d_c170927/f1p0/1884	1	824	Chr16	+	38918635	38919459	MD16G1283000	43.6	825	1889	Chr00	-	48263538	48264605	MD00G1202200	56.4
i2_LQ_Mix0_5d_c79841/f1p3/2559	1	1459	Chr13	-	38739663	38744307	MD13G1277900	57	1460	2560	Chr00	-	51397168	51399334	MD00G1214800	43
i2_HQ_Mix0_5d_c157546/f7p8/2202	1	1976	Chr01	+	28517352	28552378	MD01G1186600,MD01G1186500,MD01G1186800	89.7	1977	2203	Chr15	-	38552337	38552561	notsure	10.3
i2_LQ_Mix0_5d_c117309/f1p0/2102	1	1036	Chr16	+	38918423	38919459	MD16G1283000	49.2	1037	2104	Chr00	-	48263538	48264605	MD00G1202200	50.8
i2_LQ_Mix0_5d_c55798/f1p50/2053	3	1278	Chr15	+	27576042	27578694	MD15G1294800	62.2	1279	2053	Chr11	-	34781080	34781854	notsure	37.7
i4_LQ_Mix0_5d_c6214/f1p0/4913	46	4104	Chr17	+	3405083	3433326	MD17G1046500,MD17G1046600	82.5	4105	4921	Chr09	+	3007484	3008300	notsure	16.6
i3_LQ_Mix0_5d_c21514/f1p5/3669	1	3297	Chr11	+	38400856	38452761	MD11G1268500,MD11G1268400,MD11G1268600,MD11G1268300,MD11G1268200	89.3	3298	3690	Chr01	-	24804530	24805790	notsure	10.7
i2_LQ_Mix0_5d_c80803/f1p26/2716	7	2389	Chr04	+	9395307	9401264	MD04G1068900	87.9	2390	2710	Chr06	+	16918423	16918744	MD06G1069900	11.8
i2_HQ_Mix0_5d_c30535/f2p7/3058	1	447	Chr12	+	1713756	1714203	MD12G1017800	14.6	448	3064	Chr14	+	1410737	1422669	MD14G1015800	85.4
i1_LQ_Mix0_5d_c114268/f1p0/1855	1	535	Chr10	+	39893983	39895224	MD10G1314900	28.8	536	1855	Chr05	+	46186200	46187519	MD05G1341400	71.2
i2_LQ_Mix0_5d_c119441/f1p16/2918	1	2586	Chr00	-	16049117	16057334	MD00G1080400	90	2587	2872	Chr06	+	18216478	18216764	notsure	10
i1_LQ_Mix0_5d_c16698/f1p0/1931	7	1359	Chr09	+	8475382	8477233	MD09G1111500	66.1	1360	2046	Chr13	+	762746	764282	MD13G1012800,MD13G1012700	33.6
i2_LQ_Mix0_5d_c98467/f1p5/2285	1	528	Chr05	-	38324051	38324762	MD05G1251500	23.1	529	2273	Chr10	-	32837445	32839543	MD10G1232000	76.4
i2_LQ_Mix0_5d_c22158/f1p8/2753	1	1472	Chr10	+	39257114	39267152	MD10G1307100,MD10G1307200	53.4	1473	2750	Chr00	+	40665950	40670430	MD00G1175400	46.4
i3_LQ_Mix0_5d_c38439/f1p0/3051	1	510	Chr03	+	33836336	33836845	MD03G1250300	16.8	511	3030	Chr11	+	38604139	38611116	MD11G1270400	83.2
i1_LQ_Mix0_5d_c102079/f1p0/1554	1	1329	Chr16	+	3105593	3106920	MD16G1043800	84.8	1330	1567	Chr03	-	15131069	15131308	notsure	15.2
i3_HQ_Mix0_5d_c31506/f2p2/3213	14	500	Chr14	+	870568	871036	notsure	15.2	501	3197	Chr14	+	32157503	32164180	MD14G1243200	84
i1_LQ_Mix0_5d_c141176/f1p0/1916	11	1553	Chr12	-	7855993	7871228	MD12G1066600	80.5	1554	1916	Chr14	-	7265685	7266048	MD14G1066800	18.9
i1_LQ_Mix0_5d_c39564/f1p8/1177	1	980	Chr00	-	1567463	1679041	MD00G1013300,MD00G1012900,MD00G1012800,MD00G1013000	82.7	981	1185	Chr05	+	33253404	33253909	notsure	17.3
i2_LQ_Mix0_5d_c136132/f1p0/2939	1	2353	Chr01	+	8009899	8012831	MD01G1018800	79.7	2354	2954	Chr11	+	21888696	21890790	MD11G1180100	20.3
i2_LQ_Mix0_5d_c135603/f1p15/2091	1	1727	Chr04	-	3974904	3976823	MD04G1035400	82.6	1728	2091	Chr04	-	4084659	4126087	MD04G1036900,MD04G1037000,MD04G1036500	17.4
i3_LQ_Mix0_5d_c7958/f1p0/3406	1	425	Chr07	-	23939977	23940484	notsure	12.3	426	3421	Chr02	+	14043267	14047607	MD02G1164400,MD02G1164500	87
i1_LQ_Mix0_5d_c119448/f1p0/1751	15	1244	Chr11	-	1967019	2082287	MD11G1023400,MD11G1022700,MD11G1023000,MD11G1023900,MD11G1023700,MD11G1024000,MD11G1022800,MD11G1023200,MD11G1022900,MD11G1023500	68.5	1245	1795	Chr09	-	27223765	27224317	notsure	30.7
i1_LQ_Mix0_5d_c140408/f1p0/1416	1	858	Chr10	-	7782978	7823152	MD10G1057200,MD10G1057400,MD10G1057500,MD10G1057600	60.6	859	1417	Chr12	+	24233082	24434103	MD12G1161300,MD12G1162400,MD12G1161900,MD12G1161500,MD12G1161800,MD12G1162600	39.4
i1_HQ_Mix0_5d_c67162/f2p0/1899	1	826	Chr16	+	38918635	38919459	MD16G1283000	43.6	827	1896	Chr00	-	48263537	48264605	MD00G1202200	56.4
i2_LQ_Mix0_5d_c113937/f1p70/2756	1	1840	Chr16	+	14880786	14883664	MD16G1175300	67.3	1841	2733	Chr12	+	775853	961674	MD12G1006600,MD12G1007400,MD12G1007600,MD12G1008400,MD12G1007500,MD12G1008000,MD12G1009000,MD12G1007300,MD12G1008600,MD12G1006700,MD12G1006800,MD12G1009100,MD12G1007000	32.7
i4_HQ_Mix0_5d_c2083/f4p1/4880	1	3218	Chr15	+	54265596	54273465	MD15G1442300,MD15G1442200	65.9	3219	4880	Chr08	+	31124888	31130875	MD08G1247600	34
i4_LQ_Mix0_5d_c8667/f1p3/4245	1	1384	Chr03	-	32579002	32580402	MD03G1240500	33	1385	4172	Chr15	-	8027973	8032283	MD15G1113800,MD15G1113900	66.5
i1_HQ_Mix0_5d_c7088/f2p5/1609	1	481	Chr05	+	46185529	46186599	MD05G1341400	29.6	482	1618	Chr10	+	39895169	39896309	MD10G1314900	70.1
i2_LQ_Mix0_5d_c4211/f1p12/2569	1	1323	Chr10	+	257241	258563	notsure	51.2	1324	2586	Chr07	+	32632226	32697942	MD07G1260400,MD07G1261300,MD07G1260900,MD07G1260700,MD07G1260800,MD07G1261000,MD07G1260600,MD07G1261100,MD07G1260500,MD07G1261200	48.8
i2_LQ_Mix0_5d_c56236/f1p3/2069	19	735	Chr11	-	8246364	8247072	notsure	34.6	736	2073	Chr00	-	4618391	4620798	MD00G1028300	64.5
i0_LQ_Mix0_5d_c8111/f1p0/501	1	191	Chr14	+	26569829	26570025	MD14G1172000	38.1	192	501	Chr06	+	30610724	30611033	notsure	61.9
i4_LQ_Mix0_5d_c12617/f1p4/4724	9	941	Chr03	-	36530173	36531106	MD03G1285700	19.4	942	4811	Chr11	-	41981096	41985017	MD11G1305100	80.4
i2_LQ_Mix0_5d_c49829/f1p5/2861	1	1541	Chr14	+	29699561	29892423	MD14G1212800,MD14G1214100,MD14G1215200,MD14G1214800,MD14G1212200,MD14G1214200,MD14G1215100,MD14G1212600,MD14G1212300,MD14G1214300,MD14G1213000,MD14G1211900,MD14G1213400,MD14G1212000,MD14G1212400,MD14G1213800	53.8	1542	2862	Chr06	-	33594465	33595983	MD06G1202800	46.2
i5_LQ_Mix0_5d_c1588/f1p0/5250	1	940	Chr01	+	22935668	22938136	MD01G1115200	17.9	941	5265	Chr02	+	30515678	30520008	notsure	82.1
i2_LQ_Mix0_5d_c119787/f1p6/2292	1	444	Chr15	+	12044870	12045544	notsure	19.4	445	2293	Chr05	-	34651928	34655081	MD05G1215500	80.6
i1_LQ_Mix0_5d_c83166/f1p79/1410	2	1221	Chr16	-	12079089	12080556	MD16G1152800	85.6	1222	1422	Chr05	-	17970151	17970358	notsure	14.1
i3_LQ_Mix0_5d_c6388/f1p0/3324	1	1678	Chr15	+	54271879	54324010	MD15G1442900,MD15G1442500,MD15G1442600,MD15G1443100,MD15G1442700,MD15G1442300,MD15G1442800	50.4	1679	3325	Chr08	+	31125831	31131730	MD08G1247600	49.5
i1_LQ_Mix0_5d_c182063/f1p0/1020	2	502	Chr09	+	10241248	10242688	MD09G1133500	48.5	503	1030	Chr02	+	13252000	13252521	notsure	51.1
i1_LQ_Mix0_5d_c139939/f1p0/1736	1	831	Chr15	+	19759319	19763196	MD15G1240100	45.9	832	1811	Chr00	-	8719515	8781326	MD00G1046400,MD00G1047000,MD00G1046900,MD00G1047200,MD00G1046700,MD00G1047100,MD00G1046300	54.1
i1_LQ_Mix0_5d_c36172/f1p0/1299	1	1129	Chr12	+	17892719	17895376	MD12G1113000	86.6	1130	1303	Chr04	+	16848216	16848391	MD04G1093300	13.4
i1_LQ_Mix0_5d_c23323/f1p0/1623	1	434	Chr10	-	29806825	29808082	MD10G1199900	26.9	435	1616	Chr05	-	35755107	35763608	MD05G1225000	73.1
i1_LQ_Mix0_5d_c182968/f1p0/1039	1	493	Chr00	+	8310868	8311360	notsure	47.4	494	1041	Chr07	+	12064391	12067693	MD07G1106600	52.6
i2_HQ_Mix0_5d_c24475/f3p3/2550	1	2115	Chr17	+	32282778	32287177	MD17G1262000,MD17G1261900	82.9	2116	2550	Chr07	+	32574560	32575024	notsure	17.1
i1_LQ_Mix0_5d_c134562/f1p5/2007	3	1802	Chr05	-	42679444	42711153	MD05G1294300,MD05G1294500,MD05G1294400,MD05G1294700,MD05G1294600	89.6	1803	2009	Chr10	-	36446780	36446986	MD10G1273000	10.3
i2_LQ_Mix0_5d_c174708/f1p3/2743	1	1805	Chr13	-	38739663	38744828	MD13G1277900	65.3	1806	2763	Chr00	-	51397311	51399334	MD00G1214800	34.7
i1_LQ_Mix0_5d_c141218/f1p0/1576	1	1324	Chr00	+	43428213	43433118	MD00G1184200	84.1	1325	1573	Chr11	-	38128126	38128470	notsure	15.8
i2_LQ_Mix0_5d_c134223/f1p1/2214	1	1800	Chr12	-	26822822	26824794	notsure	81.9	1801	2192	Chr01	+	7923143	7923533	notsure	17.8
i2_LQ_Mix0_5d_c118288/f1p9/2131	1	898	Chr02	+	228085	228970	MD02G1002900	42.2	899	2127	Chr15	+	10871868	10875149	MD15G1146100	57.8
i1_LQ_Mix0_5d_c33177/f1p6/1853	2	485	Chr05	+	46185528	46186602	MD05G1341400	26.1	486	1853	Chr10	+	39894944	39896311	MD10G1314900	73.8
i2_LQ_Mix0_5d_c4988/f1p4/2531	1	1927	Chr04	+	25087815	25094284	MD04G1160600	75.5	1928	2545	Chr04	-	29525210	29525827	MD04G1210900	24.2
i2_LQ_Mix0_5d_c64710/f1p12/2897	1	2065	Chr01	-	9004195	9007922	MD01G1022700	71.2	2066	2899	Chr15	+	36319957	36320908	MD15G1329800	28.7
i3_LQ_Mix0_5d_c31691/f1p34/3744	1	1011	Chr14	-	3349113	3350123	notsure	26.6	1012	3799	Chr07	+	32622189	32634388	MD07G1260400,MD07G1260200,MD07G1260300	73.4
i2_LQ_Mix0_5d_c113552/f1p0/2144	8	726	Chr04	+	5683680	5684399	notsure	33.6	727	2143	Chr06	+	24795807	24797226	MD06G1108400	66.1
i2_LQ_Mix0_5d_c67171/f1p3/2327	1	1252	Chr15	-	14814495	14815739	MD15G1188000	53.9	1253	2321	Chr02	-	3925251	3926445	notsure	46
i2_HQ_Mix0_5d_c44824/f2p8/2615	12	361	Chr14	-	27208171	27208520	MD14G1179400	13.4	362	2617	Chr06	-	31297825	31301834	MD06G1173100	86.2
i2_HQ_Mix0_5d_c16098/f15p6/2614	1	481	Chr05	-	44320517	44321432	MD05G1312500	18.4	482	2612	Chr05	-	46047876	46053511	MD05G1339600	81.6
i2_LQ_Mix0_5d_c125185/f1p8/2086	1	1477	Chr06	-	27941704	27945696	MD06G1134900	70.8	1478	2085	Chr10	+	34217972	34218662	MD10G1249600	29.2
i3_HQ_Mix0_5d_c28388/f2p0/3525	8	365	Chr03	+	33836488	33836845	MD03G1250300	10.2	366	3525	Chr11	+	38604139	38611091	MD11G1270400	89.6
i0_LQ_Mix0_5d_c6512/f1p2/983	1	596	Chr13	+	905319	906561	MD13G1014500	60.7	597	980	Chr09	-	32774834	32775215	notsure	39.1
i1_LQ_Mix0_5d_c94557/f1p0/1388	1	1016	Chr16	+	38918441	38919465	MD16G1283000	73.6	1017	1380	Chr00	-	48264233	48264599	MD00G1202200	26.4
i0_LQ_Mix0_5d_c11392/f1p4/220	1	122	Chr06	-	4283699	4283820	notsure	57.3	123	213	Chr10	+	10407535	10407625	notsure	42.7
i2_LQ_Mix0_5d_c97267/f1p1/2370	10	575	Chr12	+	9108265	9109413	MD12G1075200	23.8	576	2383	Chr12	-	9733024	9735475	MD12G1079800	75.9
i2_LQ_Mix0_5d_c133884/f1p6/2116	1	379	Chr13	+	7132067	7132445	notsure	17.9	380	2117	Chr04	+	10883539	10886251	MD04G1079300	82.1
i2_LQ_Mix0_5d_c46166/f1p2/2740	1	1657	Chr08	-	3646160	3647814	MD08G1047800	60.4	1658	2745	Chr07	-	1764617	1765704	notsure	39.6
i1_LQ_Mix0_5d_c101608/f1p6/1618	3	1390	Chr07	+	23783152	23784540	notsure	84.6	1391	1640	Chr02	-	17066842	17067093	notsure	15.2
i2_LQ_Mix0_5d_c65677/f1p24/2827	1	2152	Chr09	-	86190	91416	MD09G1000400	75.5	2153	2849	Chr03	+	25299050	25300272	notsure	24.5
i2_LQ_Mix0_5d_c67763/f1p0/2113	1	243	Chr16	+	6871563	6871805	notsure	11.5	244	2094	Chr13	+	6898604	6901465	MD13G1097200	87.5
i0_HQ_Mix0_5d_c10530/f13p0/380	1	94	Chr15	-	47766603	47766696	MD15G1386400	24.7	95	381	Chr00	+	46326420	46326706	MD00G1191200	75.3
i2_LQ_Mix0_5d_c22936/f1p15/3101	1	2138	Chr01	+	16090448	16093893	MD01G1055700	68.9	2139	3100	Chr00	+	22992668	22993634	notsure	31
i1_LQ_Mix0_5d_c182843/f1p0/1000	3	610	Chr09	-	3360517	3362125	MD09G1050600	59	611	1031	Chr04	+	29188381	29188801	MD04G1205900	40.8
i0_LQ_Mix0_5d_c2199/f1p0/910	1	139	Chr13	-	22315894	22316032	notsure	15.2	140	913	Chr10	-	19946609	19947385	MD10G1122400	84.7
i2_LQ_Mix0_5d_c32993/f1p9/2665	1	861	Chr12	-	29092514	29094203	MD12G1212000	32.3	862	2666	Chr07	+	33919407	33922323	MD07G1273100	67.7
i2_LQ_Mix0_5d_c6919/f1p3/2270	1	269	Chr12	-	3803860	3804301	notsure	11.8	270	2279	Chr16	-	24939741	24952349	MD16G1237000	88.2
i2_LQ_Mix0_5d_c119016/f1p3/2507	1	1509	Chr13	-	38739663	38744357	MD13G1277900	60.1	1510	2511	Chr00	-	51397267	51399334	MD00G1214800	39.9
i2_LQ_Mix0_5d_c64224/f1p15/2219	1	1508	Chr12	-	25751022	25752476	notsure	67.9	1509	2222	Chr01	+	16520613	16522430	MD01G1061500	32.1
i0_LQ_Mix0_5d_c9666/f1p5/285	1	118	Chr09	-	29419472	29419589	notsure	39.9	119	296	Chr08	-	17668246	17668423	notsure	60.1
i1_LQ_Mix0_5d_c67257/f1p19/1998	3	1725	Chr15	+	2311515	2314968	MD15G1033000	82.6	1726	2086	Chr14	+	25327471	25327830	MD14G1159200	17.3
i2_LQ_Mix0_5d_c117830/f1p15/2468	25	2055	Chr01	-	27847449	27850994	MD01G1178200	82.3	2056	2468	Chr07	-	31906233	31906647	MD07G1250400	16.7
i3_LQ_Mix0_5d_c16554/f1p2/3602	1	3080	Chr16	+	10286349	10294080	MD16G1134000	84.8	3081	3633	Chr13	-	12241360	12241897	MD13G1156900	15.2
i2_LQ_Mix0_5d_c65354/f1p104/3115	1	1386	Chr13	+	21168199	21170873	MD13G1219100	44.6	1387	3109	Chr10	-	6150699	6154766	MD10G1046000	55.4
i2_LQ_Mix0_5d_c101779/f1p113/2413	8	527	Chr16	+	38918252	38918774	MD16G1283000	21.5	528	2417	Chr15	+	12211895	12221575	MD15G1162100	78.2
i1_LQ_Mix0_5d_c47041/f1p65/1598	1	729	Chr00	+	2535753	2536479	notsure	46.3	730	1572	Chr07	-	19620307	19621971	MD07G1134000	53.5
i2_LQ_Mix0_5d_c179569/f1p1/2022	2	1649	Chr04	-	19104434	19108605	MD04G1103800	81.1	1650	2033	Chr12	-	19874392	19874775	notsure	18.9
i3_LQ_Mix0_5d_c4606/f1p35/3608	1	3237	Chr11	+	38288701	38452761	MD11G1268600,MD11G1267600,MD11G1268200,MD11G1267900,MD11G1268300,MD11G1268400,MD11G1267800,MD11G1268500,MD11G1268100,MD11G1267700	89.4	3238	3614	Chr16	-	24199913	24201153	notsure	10.4
i3_LQ_Mix0_5d_c21612/f1p8/3200	1	459	Chr00	+	22636400	22636858	MD00G1108000	14.3	460	3221	Chr00	-	4439297	4443809	MD00G1025500	85.7
i2_LQ_Mix0_5d_c79495/f1p25/2246	1	314	Chr11	+	2664308	2664972	MD11G1030500	14	315	2249	Chr11	-	843569	860432	MD11G1011900,MD11G1011800,MD11G1011700,MD11G1011500,MD11G1011400	86
i2_HQ_Mix0_5d_c111966/f2p5/2774	1	1214	Chr14	+	2003465	2103025	MD14G1023000,MD14G1021700,MD14G1021800,MD14G1022900,MD14G1023100,MD14G1022700,MD14G1021400,MD14G1023300,MD14G1022100,MD14G1022500,MD14G1021900,MD14G1022000,MD14G1022400,MD14G1021600	43.8	1215	2769	Chr17	-	32170368	32171922	notsure	56.1
i3_LQ_Mix0_5d_c30511/f1p21/3776	37	2023	Chr08	+	2357420	2361486	notsure	53.3	2024	3731	Chr17	-	10271788	10274867	MD17G1118500	45.8
i2_LQ_Mix0_5d_c120015/f1p17/2744	25	1355	Chr07	-	9154240	9156871	notsure	48.3	1356	2751	Chr02	-	26646692	26649505	MD02G1226500	50.7
i2_LQ_Mix0_5d_c149997/f1p8/2607	1	2225	Chr00	-	16049117	16057383	MD00G1080400	85.3	2226	2607	Chr06	+	18216478	18216860	notsure	14.7
i1_HQ_Mix0_5d_c29554/f5p0/1880	15	298	Chr06	-	22946371	22946649	MD06G1095700	15.1	299	1880	Chr14	-	18815710	18818603	MD14G1115700	84.1
i2_LQ_Mix0_5d_c65724/f1p169/2576	22	1306	Chr12	-	1801204	1802822	notsure	49.9	1307	2576	Chr14	+	1517555	1519161	MD14G1016800	49.3
i2_LQ_Mix0_5d_c150027/f1p9/2253	11	558	Chr00	-	15994827	16025762	MD00G1079800	24.4	559	2248	Chr12	-	25063573	25140868	MD12G1169400,MD12G1170500,MD12G1170200,MD12G1170000,MD12G1169700,MD12G1170400,MD12G1169300,MD12G1169600,MD12G1169200,MD12G1169500,MD12G1170100,MD12G1170300	75.1
i2_LQ_Mix0_5d_c36510/f1p4/2866	1	1177	Chr03	-	2495269	2496450	MD03G1030800	41	1178	2868	Chr06	-	30846023	30847710	MD06G1168300	59
i2_LQ_Mix0_5d_c26757/f1p10/2160	1	680	Chr04	-	6085332	6086001	notsure	31.4	681	2163	Chr00	+	16037254	16045348	MD00G1080100	68.5
i1_LQ_Mix0_5d_c63012/f1p0/1942	1	1686	Chr15	+	2311519	2314968	MD15G1033000	86.8	1687	1942	Chr14	+	25327471	25327726	MD14G1159200	13.2
i2_LQ_Mix0_5d_c51337/f1p4/2494	1	1988	Chr02	+	35285594	35290393	MD02G1297900	79.8	1989	2492	Chr07	-	2212859	2214116	MD07G1026300	20.2
i2_LQ_Mix0_5d_c95096/f1p104/3208	2	1444	Chr13	+	21168143	21170873	MD13G1219100	45.4	1445	3177	Chr10	-	6150689	6154766	MD10G1046000	54.5
i2_LQ_Mix0_5d_c133906/f1p1/2204	18	805	Chr06	-	34187213	34188100	MD06G1207400	35.7	806	2208	Chr14	-	30127848	30130174	MD14G1217900	63.5
i1_LQ_Mix0_5d_c23897/f1p31/1429	1	1236	Chr13	+	4714262	4717042	MD13G1068700	86.5	1237	1429	Chr00	-	51058615	51058807	notsure	13.5
i1_HQ_Mix0_5d_c8494/f2p0/1582	11	370	Chr07	-	2599458	2599804	MD07G1032000	22.8	371	1581	Chr02	+	34943196	34944521	MD02G1294400,MD02G1294500	76.6
i2_LQ_Mix0_5d_c4377/f1p2/2220	1	1530	Chr16	-	623797	627226	MD16G1008300	68.7	1531	2207	Chr15	-	7356660	7357742	MD15G1104800	30.4
i3_LQ_Mix0_5d_c18897/f1p19/3599	1	2092	Chr05	+	27469973	27472338	MD05G1143500	56.1	2093	3731	Chr05	+	38113072	38116507	MD05G1249500	43.9
i4_LQ_Mix0_5d_c3408/f1p18/4177	1	648	Chr10	+	39223234	39226166	MD10G1306500	15.4	649	4201	Chr05	-	44770820	44775265	MD05G1320400,MD05G1320300	84.6
i1_HQ_Mix0_5d_c31961/f2p0/1961	1	1722	Chr15	+	2311524	2314968	MD15G1033000	87.6	1723	1966	Chr14	+	25327471	25327714	MD14G1159200	12.4
i3_LQ_Mix0_5d_c4921/f1p0/3424	22	1660	Chr13	-	38739531	38744807	MD13G1277900	46.9	1661	3493	Chr00	-	51397045	51399957	MD00G1214800	52.5
i2_LQ_Mix0_5d_c153855/f1p0/2119	12	269	Chr08	+	30292435	30292690	MD08G1235300	12.6	270	2046	Chr15	+	52715488	52721247	MD15G1426600	86.9
i3_LQ_Mix0_5d_c3019/f1p11/3168	1	380	Chr11	-	15703472	15703851	notsure	12	381	3172	Chr05	-	37158521	37161308	MD05G1240900	88
i2_HQ_Mix0_5d_c5729/f5p9/2183	1	401	Chr00	-	50127816	50129158	MD00G1205700	18.4	402	2183	Chr08	-	12294826	12301701	MD08G1130500	81.6
i3_LQ_Mix0_5d_c13141/f1p0/3089	1	1041	Chr10	+	5393275	5395283	MD10G1041500	33.7	1042	3072	Chr10	-	5199419	5202391	MD10G1039800	65.7
i1_LQ_Mix0_5d_c107582/f1p0/1100	1	352	Chr06	-	912312	913401	MD06G1008200	31.9	353	1102	Chr13	-	20312190	20323959	notsure	68.1
i3_HQ_Mix0_5d_c2434/f2p13/3290	12	561	Chr09	+	28299748	28300296	MD09G1229200	16.7	562	3299	Chr16	+	6939479	6951607	MD16G1100100	83
i1_LQ_Mix0_5d_c132197/f1p0/1883	1	319	Chr16	+	38918638	38918958	MD16G1283000	16.9	320	1883	Chr00	-	48263542	48584571	MD00G1202400,MD00G1202900,MD00G1202600,MD00G1202200,MD00G1202700,MD00G1202300,MD00G1202800	83.1
i3_LQ_Mix0_5d_c5005/f1p0/3609	1	577	Chr05	-	3850505	3851085	notsure	15.9	578	3614	Chr10	+	39738317	39743262	MD10G1312700	83.9
i2_HQ_Mix0_5d_c111697/f3p0/2138	1	1060	Chr16	+	38918399	38919459	MD16G1283000	49.7	1061	2128	Chr00	-	48263536	48264605	MD00G1202200	50
i2_LQ_Mix0_5d_c10630/f1p31/3079	6	2285	Chr17	-	28864359	28868686	MD17G1239400	74	2286	3082	Chr09	-	31568268	31569206	MD09G1246500	25.9
i1_LQ_Mix0_5d_c83041/f1p5/1829	10	438	Chr10	-	9502281	9509107	notsure	23.4	439	1830	Chr17	+	19410168	19413432	MD17G1174500	76.1
i1_LQ_Mix0_5d_c118217/f1p0/1553	2	1165	Chr15	-	23404433	23409675	MD15G1270100	74.4	1166	1564	Chr02	-	12956619	12957017	notsure	25.5
i1_LQ_Mix0_5d_c31478/f2p0/1961	1	1539	Chr03	+	8816083	8818447	MD03G1103100	77.5	1540	1986	Chr02	+	36441552	36442000	notsure	22.5
i2_HQ_Mix0_5d_c4351/f4p1/2531	1	649	Chr16	-	14905127	14905771	notsure	25.6	650	2525	Chr02	+	30309390	30406063	MD02G1251900,MD02G1252200,MD02G1252100,MD02G1251500,MD02G1252000,MD02G1251600,MD02G1252300,MD02G1251700	74.1
i1_LQ_Mix0_5d_c115795/f1p24/1906	1	277	Chr04	+	21466217	21466493	notsure	14.5	278	1901	Chr17	-	8562615	8568546	MD17G1101100	85.3
i1_LQ_Mix0_5d_c35053/f1p0/1625	1	1397	Chr03	+	30330762	30333294	MD03G1218700,MD03G1218600,MD03G1218500	87.1	1398	1603	Chr07	-	10022768	10023087	MD07G1093400	12.9
i3_LQ_Mix0_5d_c3474/f1p0/3631	1	1361	Chr03	+	36590360	36592343	MD03G1286300	37.2	1362	3654	Chr05	+	33083121	33085587	notsure	62.8
i1_LQ_Mix0_5d_c34961/f1p0/1909	1	824	Chr16	+	38918635	38919459	MD16G1283000	43.2	825	1894	Chr00	-	48263536	48264605	MD00G1202200	56.1
i2_LQ_Mix0_5d_c83444/f1p8/2863	1	2366	Chr03	-	28121636	28125636	MD03G1205000	82.3	2367	2876	Chr16	-	11412369	11414856	notsure	17.7
i1_LQ_Mix0_5d_c5582/f5p0/1583	1	631	Chr15	+	19759319	19761177	MD15G1240100	39.9	632	1583	Chr00	-	8779359	8781299	MD00G1047200	60.1
i3_LQ_Mix0_5d_c12882/f1p0/3096	1	1306	Chr06	-	30841784	30877359	MD06G1168600,MD06G1168300	42.8	1307	3049	Chr05	+	28055004	28859723	MD05G1153000,MD05G1151100,MD05G1160000,MD05G1150600,MD05G1149900,MD05G1153100,MD05G1157400,MD05G1155800,MD05G1154900,MD05G1151300,MD05G1150800,MD05G1152500,MD05G1154800,MD05G1159600,MD05G1153600,MD05G1153700,MD05G1157200,MD05G1156100,MD05G1153400,MD05G1150400,MD05G1155600,MD05G1156000,MD05G1153500,MD05G1155100,MD05G1157800,MD05G1157700,MD05G1158000,MD05G1156900,MD05G1155300,MD05G1152700,MD05G1156…	57.1
i1_HQ_Mix0_5d_c170696/f10p0/1787	1	214	Chr15	-	19602215	19602428	MD15G1238100	12	215	1788	Chr02	-	10104725	10107865	MD02G1124100	88
i2_HQ_Mix0_5d_c172884/f2p39/2826	5	493	Chr03	-	11861371	11862457	MD03G1125700	17.3	494	2831	Chr11	-	13286809	13291081	MD11G1142500	82.5
i2_LQ_Mix0_5d_c116953/f1p117/2457	1	1316	Chr17	+	13573441	13575450	MD17G1148600	53.4	1317	2454	Chr13	-	18872360	18873501	notsure	46.2
i2_LQ_Mix0_5d_c87333/f1p3/2050	12	538	Chr05	-	29571273	29575630	MD05G1166400	25.7	539	2052	Chr10	-	24494653	24496306	MD10G1156400	73.8
i2_LQ_Mix0_5d_c106063/f1p3/1997	1	200	Chr10	-	38166630	38166829	MD10G1293400	10	201	2005	Chr05	-	45974953	45977314	MD05G1338300	90
i1_LQ_Mix0_5d_c78623/f1p0/1951	1	1608	Chr08	-	26165368	26171587	MD08G1201800	82	1609	1960	Chr10	-	7311969	7312315	notsure	18
i3_LQ_Mix0_5d_c23621/f1p0/4026	29	2071	Chr01	+	32526979	32530509	notsure	49.3	2072	4144	Chr07	-	36556159	36559635	MD07G1310800	50
i1_LQ_Mix0_5d_c78209/f1p0/1780	8	474	Chr10	-	9502281	9509148	notsure	26	475	1794	Chr17	+	19410168	19413849	MD17G1174500	73.6
i2_HQ_Mix0_5d_c44861/f3p5/2289	4	1980	Chr09	-	1429407	1432069	MD09G1024000	86.4	1981	2287	Chr09	+	2958670	2958982	MD09G1045400	13.4
i1_LQ_Mix0_5d_c23582/f1p7/1856	1	1480	Chr08	-	26165368	26171469	MD08G1201800	79.1	1481	1872	Chr10	-	7311944	7312323	notsure	20.9
i1_LQ_Mix0_5d_c19671/f2p0/1640	1	1470	Chr15	+	2311525	2314968	MD15G1033000	89.3	1471	1647	Chr14	+	25327471	25327647	MD14G1159200	10.7
i2_HQ_Mix0_5d_c47965/f3p2/2283	1	399	Chr05	-	32204023	32204582	MD05G1194400	17.5	400	2284	Chr10	-	27423138	27426814	MD10G1181100	82.5
i3_LQ_Mix0_5d_c29175/f1p0/3339	4	2810	Chr04	+	25081566	25086844	MD04G1160500	83.8	2811	3349	Chr05	+	16926961	16929510	notsure	16.1
i2_LQ_Mix0_5d_c113273/f1p3/2896	1	1526	Chr05	+	6924113	6925638	notsure	52.4	1527	2912	Chr10	+	6297675	6299059	notsure	47.6
i3_LQ_Mix0_5d_c32713/f1p18/3263	1	934	Chr07	+	34984916	34986094	MD07G1288900	28.6	935	3264	Chr01	+	31157199	31159618	MD01G1219200	71.4
i2_HQ_Mix0_5d_c33993/f3p11/2253	1	1683	Chr15	+	2311525	2314803	MD15G1033000	74.6	1684	2255	Chr08	+	25430593	25431384	notsure	25.4
i2_LQ_Mix0_5d_c64877/f1p54/2839	1	1333	Chr06	+	240861	244708	MD06G1002300	46.8	1334	2838	Chr11	+	40110162	40112509	MD11G1282700	52.9
i5_LQ_Mix0_5d_c2538/f1p0/5094	1	1247	Chr09	-	14196680	14198100	MD09G1170000	24.4	1248	5109	Chr17	+	15124060	15182992	MD17G1157200,MD17G1157300,MD17G1157400,MD17G1157500	75.6
i2_LQ_Mix0_5d_c81849/f1p12/2831	1	2065	Chr01	-	9004195	9007922	MD01G1022700	72.9	2066	2831	Chr15	+	36319957	36320832	MD15G1329800	27
i3_LQ_Mix0_5d_c19885/f1p0/3174	1	1718	Chr06	+	34628615	34630332	MD06G1213500	54	1719	3182	Chr14	-	17090604	17092075	notsure	46
i2_LQ_Mix0_5d_c9817/f1p13/2784	3	1423	Chr07	+	27719848	27735184	notsure	51	1424	2782	Chr01	-	24401853	24404075	MD01G1134400	48.8
i3_LQ_Mix0_5d_c29475/f1p0/3775	4	1675	Chr01	-	1483771	1485464	MD01G1004800,MD01G1004700	42.9	1676	3898	Chr03	-	32267264	32269495	notsure	57
i4_LQ_Mix0_5d_c5097/f1p8/4961	27	2779	Chr17	+	3405083	3422795	MD17G1046500	55.3	2780	4976	Chr09	+	3006115	3008309	MD09G1045700	44.2
i0_LQ_Mix0_5d_c10239/f1p0/288	1	207	Chr12	+	11105117	11105320	notsure	71.9	208	288	Chr15	-	23458945	23459025	notsure	28.1
i2_LQ_Mix0_5d_c52115/f3p20/2236	1	1047	Chr03	-	10576813	10578601	MD03G1117500	46.8	1048	2237	Chr05	+	35378956	35380145	notsure	53.2
i2_LQ_Mix0_5d_c98998/f1p8/2449	1	1905	Chr06	-	7421168	7423094	notsure	77.8	1906	2450	Chr13	+	18340469	18347786	notsure	22.2
i4_LQ_Mix0_5d_c12306/f1p12/4599	1	3168	Chr13	-	38739395	38744828	MD13G1277900	68.5	3169	4628	Chr00	-	51397312	51399822	MD00G1214800	31.5
i2_LQ_Mix0_5d_c96077/f1p1/2844	1	324	Chr09	-	9635224	9636077	notsure	11.4	325	2845	Chr02	+	29561014	29566569	MD02G1245300	88.6
i1_HQ_Mix0_5d_c55943/f64p0/1745	2	941	Chr07	+	27781123	27783180	MD07G1199400	53.8	942	1746	Chr01	+	24438080	24439537	MD01G1134700	46.1
i2_LQ_Mix0_5d_c153032/f1p6/2613	4	512	Chr02	+	3384233	3385466	MD02G1041500	19.5	513	2615	Chr02	+	30738135	31462068	MD02G1258800,MD02G1256500,MD02G1256400,MD02G1257300,MD02G1259200,MD02G1259300,MD02G1257400,MD02G1258000,MD02G1256200,MD02G1256100,MD02G1259900,MD02G1260900,MD02G1259600,MD02G1255700,MD02G1256900,MD02G1256800,MD02G1257700,MD02G1257800,MD02G1256700,MD02G1259700,MD02G1258700,MD02G1259400,MD02G1257100,MD02G1258600,MD02G1257200,MD02G1255900,MD02G1258100	80.4
i2_HQ_Mix0_5d_c37184/f3p21/2320	1	1647	Chr00	-	31190959	31195404	MD00G1143300	71	1648	2298	Chr15	-	2739480	2740400	MD15G1039000,MD15G1038900	28.1
i1_LQ_Mix0_5d_c119692/f1p0/1428	1	1234	Chr00	+	20513044	20519209	MD00G1098500	85.7	1235	1440	Chr04	+	30569580	30569785	notsure	14.3
i2_LQ_Mix0_5d_c32112/f1p3/2692	2	1114	Chr11	-	42990629	42994157	MD11G1318000	41.3	1115	2692	Chr12	+	27937292	27939719	MD12G1198300	58.6
i1_LQ_Mix0_5d_c21217/f1p0/1227	1	555	Chr10	-	34330184	34330739	MD10G1250800	45.1	556	1229	Chr10	-	34470914	34472976	notsure	54.8
i2_LQ_Mix0_5d_c25186/f1p0/2531	19	2056	Chr12	+	7645578	7650385	MD12G1065300	80.5	2057	2532	Chr13	+	11285911	11287124	MD13G1145100	18.8
i3_LQ_Mix0_5d_c13380/f1p0/3057	7	1602	Chr06	+	34628740	34630336	MD06G1213500	51.6	1603	3094	Chr02	-	35599451	35602998	notsure	48.2
i2_LQ_Mix0_5d_c94299/f1p73/2344	1	1009	Chr16	+	27872733	27876550	MD16G1249500	43.2	1010	2338	Chr12	-	25765055	25767111	MD12G1177300	56.8
i2_LQ_Mix0_5d_c130629/f1p57/2178	1	698	Chr05	-	42682400	42683518	MD05G1294300,MD05G1294400	31.6	699	2206	Chr10	-	36446780	36449542	MD10G1273000	68.4
i2_LQ_Mix0_5d_c97470/f1p11/2200	1	377	Chr00	-	50127816	50129134	MD00G1205700	17.1	378	2201	Chr08	-	12294796	12301701	MD08G1130500	82.9
i2_LQ_Mix0_5d_c175626/f1p37/2102	2	1819	Chr16	+	19843703	19845514	MD16G1209800	86.5	1820	2102	Chr06	+	7210532	7210813	notsure	13.5
i2_LQ_Mix0_5d_c135275/f1p2/2680	16	1117	Chr11	-	42990629	42994149	MD11G1318000	41.3	1118	2656	Chr12	+	27937292	27939674	MD12G1198300	57.7
i1_LQ_Mix0_5d_c128020/f39p0/1780	18	301	Chr06	-	22946371	22946649	MD06G1095700	15.9	302	1782	Chr14	-	18815813	18818603	MD14G1115700	83.1
i3_LQ_Mix0_5d_c2156/f2p6/3179	5	432	Chr07	-	32097061	32097442	MD07G1253700	13.4	433	3191	Chr01	-	28127968	28132019	MD01G1182800	86.5
i3_HQ_Mix0_5d_c36870/f6p0/3192	1	620	Chr13	+	25299488	25300107	notsure	19.4	621	3193	Chr10	-	39297577	39300733	MD10G1307800	80.6
i3_LQ_Mix0_5d_c32419/f1p5/3643	5	860	Chr10	+	24850655	24851474	notsure	23.4	861	3658	Chr11	+	4966118	4969229	notsure	76.5
i2_LQ_Mix0_5d_c83914/f1p3/2209	1	1626	Chr16	-	2007176	2008806	notsure	73.9	1627	2200	Chr13	-	11539238	11540818	MD13G1147600	26.1
i2_LQ_Mix0_5d_c4044/f7p3/2968	1	1831	Chr13	-	38739663	38744854	MD13G1277900	61.7	1832	2969	Chr00	-	51397131	51399334	MD00G1214800	38.3
i1_LQ_Mix0_5d_c165069/f1p0/1359	2	600	Chr07	+	25543540	25545367	MD07G1176100	44	601	1360	Chr01	+	22309190	22310441	MD01G1110300	55.9
i1_LQ_Mix0_5d_c99407/f1p3/1588	1	707	Chr16	-	38918627	38919337	notsure	44.4	708	1594	Chr17	-	25663190	25664320	MD17G1211400	55.6
i2_LQ_Mix0_5d_c66382/f1p8/2101	1	296	Chr13	+	21168141	21170873	MD13G1219100	14	297	2106	Chr10	-	6150612	6154766	MD10G1046000	85.8
i2_LQ_Mix0_5d_c52960/f1p12/2622	1	605	Chr01	-	12089875	12099066	MD01G1035900	23.1	606	2620	Chr16	+	6900281	6914261	MD16G1099100,MD16G1098900	76.9
i1_LQ_Mix0_5d_c136651/f1p5/1712	1	715	Chr11	-	992911	993625	notsure	41.7	716	1713	Chr15	-	26721101	26722830	MD15G1289200	58.3
i0_LQ_Mix0_5d_c8072/f1p7/768	1	358	Chr07	+	22676955	22677677	MD07G1155800	45	359	795	Chr07	-	857574	859361	MD07G1009100	55
i1_HQ_Mix0_5d_c118699/f2p0/1892	1	824	Chr16	+	38918635	38919459	MD16G1283000	43.5	825	1893	Chr00	-	48263537	48264605	MD00G1202200	56.5
i2_LQ_Mix0_5d_c106322/f1p8/2032	1	320	Chr15	+	53905917	53906955	notsure	15.7	321	2031	Chr03	-	33792290	33797015	MD03G1249900	84.2
i4_LQ_Mix0_5d_c9388/f1p0/4211	14	1868	Chr07	+	1341370	1510026	MD07G1017100,MD07G1015400,MD07G1017300,MD07G1015000,MD07G1016400,MD07G1015700,MD07G1017200,MD07G1015900,MD07G1015300,MD07G1016500,MD07G1015600,MD07G1016200,MD07G1016000,MD07G1015200,MD07G1016600,MD07G1014900,MD07G1017000,MD07G1016700,MD07G1016100,MD07G1017400	43	1869	4315	Chr03	-	36072881	36569343	MD03G1279500,MD03G1283700,MD03G1282900,MD03G1281400,MD03G1285200,MD03G1282800,MD03G1282100,MD03G1279600,MD03G1284300,MD03G1284200,MD03G1283000,MD03G1282700,MD03G1285700,MD03G1284700,MD03G1279700,MD03G1285500,MD03G1281200,MD03G1282400,MD03G1280000,MD03G1279100,MD03G1281000,MD03G1280300,MD03G1279000,MD03G1283200,MD03G1280200,MD03G1286200,MD03G1283300,MD03G1279200,MD03G1286100,MD03G1282300,MD03G1279…	56.7
i2_LQ_Mix0_5d_c172897/f14p13/2403	1	1753	Chr06	+	23897511	23900328	MD06G1102000	73	1754	2403	Chr14	+	19594679	19595608	MD14G1121300	27
i2_HQ_Mix0_5d_c16753/f4p4/2233	13	382	Chr06	+	36529234	36530606	MD06G1234200	16.6	383	2231	Chr14	+	31972350	31976588	MD14G1240900	82.8
i2_LQ_Mix0_5d_c117166/f1p0/2399	1	2142	Chr07	+	113146	117302	MD07G1000500	89.3	2143	2399	Chr12	+	30226267	30226523	notsure	10.7
i1_LQ_Mix0_5d_c19695/f1p14/1954	4	1626	Chr09	-	14866785	14868731	MD09G1175000	80.1	1627	2026	Chr02	-	34915808	35005766	MD02G1294900,MD02G1294700,MD02G1295400,MD02G1294800,MD02G1294600,MD02G1295500,MD02G1294200,MD02G1294100	19.7
i1_LQ_Mix0_5d_c13673/f1p0/1076	1	834	Chr11	-	1782664	1792809	MD11G1020500	77.4	835	1077	Chr08	+	5402491	5402735	notsure	22.6
i1_LQ_Mix0_5d_c36886/f1p0/2012	1	448	Chr11	-	15099888	15100824	MD11G1157000	20.9	449	2145	Chr00	+	41409779	41549936	MD00G1178100,MD00G1177800	79.1
i2_LQ_Mix0_5d_c116313/f1p3/2677	1	1113	Chr11	-	42990629	42994158	MD11G1318000	41.4	1114	2686	Chr00	+	8480245	8482689	notsure	58.6
i1_LQ_Mix0_5d_c149218/f4p0/1893	1	557	Chr16	+	38918634	38919190	MD16G1283000	29.4	558	1894	Chr00	-	48263538	48390338	MD00G1202400,MD00G1202600,MD00G1202200,MD00G1202700,MD00G1202300,MD00G1202800	70.6
i2_LQ_Mix0_5d_c155083/f1p1/2225	1	681	Chr17	-	34035211	34036252	MD17G1280000	30.6	682	2226	Chr04	-	25246468	25257594	notsure	69.4
i1_LQ_Mix0_5d_c77205/f1p12/1606	1	1372	Chr03	-	9517859	9521601	MD03G1109400	85.4	1373	1607	Chr10	-	13932569	13932803	notsure	14.6
i1_LQ_Mix0_5d_c7251/f1p0/1638	1	577	Chr10	+	12995690	12996518	MD10G1087700	33.1	578	1745	Chr14	+	21238852	21240326	MD14G1134100	66.9
i1_LQ_Mix0_5d_c64408/f1p31/1671	1	421	Chr17	-	16132778	16134002	MD17G1163000	25.1	422	1676	Chr02	+	26226566	26227806	notsure	74.9
i2_LQ_Mix0_5d_c68309/f1p6/1988	1	737	Chr03	-	3380362	3381098	MD03G1043100	37.1	738	1985	Chr11	-	4007536	4009837	MD11G1046100	62.8
i2_HQ_Mix0_5d_c38806/f2p0/2311	1	1502	Chr10	-	18547809	18550746	MD10G1112100	65	1503	2310	Chr15	-	26853543	26855000	MD15G1290800	35
i2_LQ_Mix0_5d_c17522/f1p22/2643	1	2057	Chr09	+	2938117	2943286	MD09G1045100	77.7	2058	2648	Chr09	-	1464595	1465175	notsure	22.3
i2_LQ_Mix0_5d_c131587/f1p46/2837	18	1122	Chr13	+	110635	111739	MD13G1001600	38.9	1123	2844	Chr08	-	3079814	3128677	MD08G1042000,MD08G1042400,MD08G1042100,MD08G1042500,MD08G1042200,MD08G1041800	60.5
i2_LQ_Mix0_5d_c79960/f1p89/3073	2	733	Chr07	-	489980	491028	MD07G1004500	23.8	734	3078	Chr15	+	15822647	15824992	notsure	76.2
i2_LQ_Mix0_5d_c3526/f1p19/2315	2	1648	Chr00	-	31190959	31195404	MD00G1143300	71.3	1649	2299	Chr15	-	2739480	2740400	MD15G1039000,MD15G1038900	28.2
i2_HQ_Mix0_5d_c5419/f2p0/2131	1	1615	Chr07	+	262019	264015	MD07G1002400	75.8	1616	2126	Chr02	-	37324362	37355817	MD02G1318900,MD02G1318800,MD02G1319100	24
i2_LQ_Mix0_5d_c24956/f1p16/2184	1	341	Chr01	+	27949548	27949888	MD01G1179800	15.6	342	2179	Chr01	-	27475969	27477809	MD01G1172800	84.4
i2_LQ_Mix0_5d_c10173/f1p11/2751	1	363	Chr06	-	25707062	25707421	notsure	13.2	364	2750	Chr14	-	20099548	20103575	MD14G1126300,MD14G1126400	86.8
i1_LQ_Mix0_5d_c106253/f1p0/1046	1	836	Chr00	+	32693037	32694139	notsure	81.4	837	1026	Chr17	+	29903171	29906792	notsure	18.5
i3_LQ_Mix0_5d_c28554/f1p0/3418	1	2380	Chr16	-	23962546	23971435	MD16G1233000,MD16G1232900	69.5	2381	3421	Chr14	-	2702765	3170547	MD14G1032300,MD14G1035300,MD14G1032900,MD14G1035200,MD14G1034500,MD14G1034400,MD14G1034600,MD14G1032800,MD14G1035000,MD14G1033300,MD14G1034700,MD14G1033200,MD14G1034300,MD14G1031900,MD14G1034800,MD14G1034900,MD14G1033400,MD14G1033800,MD14G1031100,MD14G1032600,MD14G1032700,MD14G1034200,MD14G1035500,MD14G1032500,MD14G1034100,MD14G1032200,MD14G1031400,MD14G1033100,MD14G1031200,MD14G1033000	30.4
i0_LQ_Mix0_5d_c5898/f1p0/904	1	760	Chr03	+	36633488	36634725	MD03G1287200	83.3	761	912	Chr09	+	34266868	34267019	notsure	16.7
i1_LQ_Mix0_5d_c47926/f1p6/1949	1	517	Chr17	+	5614506	5615288	notsure	26.4	518	1955	Chr13	+	7709069	7710524	notsure	73.6
i5_LQ_Mix0_5d_c1072/f1p0/5933	1	3876	Chr01	+	28357475	28361332	notsure	63.6	3877	6072	Chr17	-	24892405	24895453	MD17G1205300	36
i3_HQ_Mix0_5d_c31687/f10p0/3405	1	1896	Chr05	-	42682400	42686886	MD05G1294300,MD05G1294400	55.7	1897	3405	Chr10	-	36446780	36449542	MD10G1273000	44.3
i1_LQ_Mix0_5d_c100824/f1p0/1798	1	261	Chr04	+	25110356	25110615	notsure	14.5	262	1805	Chr00	-	21512437	21514391	MD00G1101700	85.5
i2_LQ_Mix0_5d_c23656/f1p1/2624	1	2251	Chr16	-	4781408	4853818	MD16G1068100,MD16G1068200,MD16G1068300	85.7	2252	2619	Chr00	-	16230074	16230441	MD00G1081400	14
i1_LQ_Mix0_5d_c97730/f1p1/1557	1	1362	Chr01	+	28551017	28552378	MD01G1186800	85.8	1363	1587	Chr15	-	38552339	38552561	notsure	14.2
i2_HQ_Mix0_5d_c7048/f2p2/2767	1	723	Chr01	-	22310978	22313259	MD01G1110400	25.9	724	2792	Chr07	-	25552106	25569434	MD07G1176300	74.1
i2_LQ_Mix0_5d_c83093/f1p46/2648	1	308	Chr00	-	10021802	10022170	MD00G1053600	11.6	309	2648	Chr17	-	14584692	14739528	MD17G1154300,MD17G1154500,MD17G1154400	88.4
i1_LQ_Mix0_5d_c82000/f1p4/1907	2	1314	Chr08	-	8346813	8348591	MD08G1098900	70.3	1315	1866	Chr00	-	51925966	51926677	MD00G1220400	29.6
i1_LQ_Mix0_5d_c13305/f1p3/1177	1	592	Chr11	+	40477625	40478652	notsure	50.3	593	1177	Chr03	-	16380410	16380995	notsure	49.7
i1_LQ_Mix0_5d_c60516/f1p0/1774	1	1206	Chr03	-	22808730	22812554	MD03G1168700	68	1207	1774	Chr14	+	1421949	1422691	MD14G1015800	32
i1_LQ_Mix0_5d_c76686/f1p0/1759	1	1346	Chr14	+	26710596	26713111	MD14G1173000	74.8	1347	1798	Chr09	-	25636516	25637848	notsure	25.1
i2_LQ_Mix0_5d_c132073/f1p14/2230	1	271	Chr09	+	2489234	2489506	MD09G1039800	12.1	272	2230	Chr09	+	2344795	2384316	MD09G1038500,MD09G1039000,MD09G1038900,MD09G1038700	87.6
i2_LQ_Mix0_5d_c101232/f1p11/2704	1	391	Chr01	-	12091663	12099056	MD01G1035900	14.4	392	2718	Chr16	+	6776140	6914262	MD16G1097200,MD16G1098100,MD16G1098800,MD16G1098200,MD16G1098900,MD16G1098300,MD16G1097900,MD16G1098700,MD16G1099100,MD16G1097300,MD16G1097800,MD16G1097700,MD16G1098400	85.6
i2_LQ_Mix0_5d_c94344/f1p3/3000	1	1800	Chr13	-	38739663	38744823	MD13G1277900	59.5	1801	3023	Chr00	-	51397046	51399334	MD00G1214800	40.5
i3_HQ_Mix0_5d_c28368/f2p0/3952	1	2703	Chr17	-	16132778	16144975	MD17G1163200,MD17G1163100,MD17G1163000	68.3	2704	3958	Chr02	+	26226566	26227805	notsure	31.7
i2_LQ_Mix0_5d_c23554/f1p0/2477	1	357	Chr07	+	22676975	22677677	MD07G1155800	14.3	358	2496	Chr09	-	34899817	35012229	MD09G1273300,MD09G1272800,MD09G1273200,MD09G1272700,MD09G1273800,MD09G1273100,MD09G1273500,MD09G1273000,MD09G1273400,MD09G1273700	85.7
i2_LQ_Mix0_5d_c50437/f1p20/2119	1	253	Chr16	+	38917257	38917509	MD16G1283000	11.9	254	2124	Chr17	+	1436358	1445016	MD17G1018400	88.1
i1_LQ_Mix0_5d_c137309/f1p0/1571	7	417	Chr04	-	27303243	27305580	MD04G1182100	25.8	418	1587	Chr11	+	11848950	11853210	MD11G1131000	73.4
i2_LQ_Mix0_5d_c137519/f1p9/2262	1	333	Chr15	+	12044878	12045442	notsure	14.7	334	2268	Chr05	-	34651954	34654993	MD05G1215500	85.3
i1_HQ_Mix0_5d_c139054/f2p0/1848	1	337	Chr05	+	36261360	36261686	notsure	18.2	338	1853	Chr00	+	16037254	16045699	MD00G1080100	81.8
i2_HQ_Mix0_5d_c176524/f2p4/2491	1	533	Chr00	-	10021423	10022146	MD00G1053600	21.4	534	2491	Chr17	-	14584674	14598277	MD17G1154300	78.6
i1_LQ_Mix0_5d_c116951/f1p0/1650	3	644	Chr15	+	19759320	19763196	MD15G1240100	39.3	645	1633	Chr00	-	8779357	8781326	MD00G1047200	60.6
i2_HQ_Mix0_5d_c173082/f6p4/2348	3	529	Chr14	+	14508400	14508926	notsure	22.4	530	2349	Chr12	-	3069168	3073713	MD12G1027300	77.5
i1_LQ_Mix0_5d_c59070/f1p0/1621	1	1248	Chr15	+	27576645	27578694	MD15G1294800	76.8	1249	1624	Chr15	+	47971714	47972089	notsure	23.1
i2_LQ_Mix0_5d_c112453/f1p3/2690	1	1122	Chr11	-	42990629	42994166	MD11G1318000	42.8	1123	2621	Chr00	+	8480245	8482610	notsure	57.2
i2_LQ_Mix0_5d_c7499/f1p9/2195	1	500	Chr00	-	50127816	50129257	MD00G1205700	22.8	501	2192	Chr08	-	12294930	12301701	MD08G1130500	77.2
i1_HQ_Mix0_5d_c51021/f3p0/1948	4	1671	Chr12	-	23676877	23680063	MD12G1156200	85.6	1672	1948	Chr16	+	567034	567310	MD16G1007500	14.2
i2_LQ_Mix0_5d_c154620/f1p19/2693	1	2411	Chr01	+	27871951	27874361	MD01G1178700	89.5	2412	2695	Chr11	+	3495470	3495753	notsure	10.5
i2_LQ_Mix0_5d_c94529/f1p31/3043	1	2241	Chr17	-	28864359	28868646	MD17G1239400	73.6	2242	3040	Chr09	-	31568266	31569206	MD09G1246500	26.3
i2_LQ_Mix0_5d_c48721/f1p0/2110	1	1882	Chr04	-	3862197	3864575	MD04G1034700	89.4	1883	2105	Chr04	-	4101639	4101912	notsure	10.6
i3_LQ_Mix0_5d_c18009/f1p0/4004	4	1670	Chr00	+	8728043	9535412	MD00G1049000,MD00G1049900,MD00G1047900,MD00G1049400,MD00G1046500,MD00G1047300,MD00G1048600,MD00G1047700,MD00G1048400,MD00G1049200,MD00G1046600,MD00G1048500,MD00G1048200,MD00G1049700,MD00G1046800	41.5	1671	4014	Chr04	+	18739318	18741662	notsure	58.4
i1_LQ_Mix0_5d_c77274/f1p11/1892	1	697	Chr12	+	29114721	29116158	MD12G1212300	36.8	698	1894	Chr04	+	28646247	28647442	notsure	63.2
i1_LQ_Mix0_5d_c79870/f1p0/1362	1	1076	Chr00	-	16049117	16052868	MD00G1080400	78.9	1077	1363	Chr06	+	18216478	18216765	notsure	21.1
i2_HQ_Mix0_5d_c2486/f25p3/2950	9	502	Chr07	-	32097061	32097495	MD07G1253700	16.7	503	2950	Chr01	-	28127969	28132019	MD01G1182800	83
i2_LQ_Mix0_5d_c79539/f1p10/2156	1	1779	Chr03	+	7526739	7529351	MD03G1090900	82.5	1780	2156	Chr10	+	4267227	4267604	MD10G1033100	17.5
i1_LQ_Mix0_5d_c101992/f1p0/1677	1	699	Chr00	+	20513066	20516074	MD00G1098500	41.9	700	1667	Chr02	-	27428938	27432062	MD02G1229900	58.1
i1_LQ_Mix0_5d_c178454/f1p0/1892	1	825	Chr16	+	38918635	38919459	MD16G1283000	43.6	826	1892	Chr00	-	48263539	48264605	MD00G1202200	56.4
i1_HQ_Mix0_5d_c75737/f7p0/1952	1	374	Chr16	+	11312686	11313249	MD16G1145400	19.2	375	1952	Chr02	-	32604986	32608594	MD02G1271400	80.8
i1_HQ_Mix0_5d_c47639/f2p0/1847	1	1628	Chr09	-	11049290	11071889	MD09G1141500,MD09G1141400,MD09G1141300,MD09G1141700,MD09G1141200,MD09G1141600	87.9	1629	1852	Chr15	-	20286897	20287120	notsure	12.1
i2_LQ_Mix0_5d_c118714/f1p12/2955	26	423	Chr08	-	30982853	30983250	MD08G1244900	13.5	424	2954	Chr15	-	53987122	53998286	MD15G1440000	85.7
i1_LQ_Mix0_5d_c110182/f1p0/1959	1	968	Chr16	+	38918489	38919459	MD16G1283000	49.4	969	1959	Chr00	-	48263615	48264605	MD00G1202200	50.6
i1_LQ_Mix0_5d_c13137/f1p0/1143	1	363	Chr00	+	49172362	49172724	notsure	31.6	364	1150	Chr09	-	32659721	32661142	notsure	68.4
i1_LQ_Mix0_5d_c8669/f1p7/1839	4	883	Chr17	-	566047	567881	MD17G1008800	47.7	884	1843	Chr04	-	1342300	1343258	MD04G1011900	52.1
i3_LQ_Mix0_5d_c16560/f1p16/3667	1	2663	Chr01	+	16090472	16093438	MD01G1055700	70.9	2664	3754	Chr13	-	3281612	3282703	notsure	29.1
i3_HQ_Mix0_5d_c9380/f3p0/3262	1	1161	Chr10	-	20600491	20601664	MD10G1126000	35.6	1162	3264	Chr14	-	406062	410457	MD14G1003200	64.4
i2_LQ_Mix0_5d_c47248/f1p7/3009	14	655	Chr17	+	19409955	19410597	MD17G1174500	21.3	656	3009	Chr12	-	10411749	10415149	MD12G1085200	78.2
i2_LQ_Mix0_5d_c4353/f1p37/2643	1	306	Chr00	-	10021802	10022168	MD00G1053600	11.6	307	2634	Chr17	-	14584700	14739528	MD17G1154300,MD17G1154500,MD17G1154400	88
i2_LQ_Mix0_5d_c114535/f1p1/2804	1	843	Chr17	-	13097141	13097982	MD17G1145000	30	844	2806	Chr14	+	20327214	20332018	MD14G1127500,MD14G1127600	69.9
i2_LQ_Mix0_5d_c150420/f1p16/2088	1	733	Chr03	+	4001424	4003391	MD03G1050000	35.2	734	2080	Chr00	-	13466649	13467995	notsure	64.8
i1_HQ_Mix0_5d_c58630/f56p0/1537	1	732	Chr07	+	27781317	27783180	MD07G1199400	47.6	733	1537	Chr01	+	24438080	24439537	MD01G1134700	52.4
i2_LQ_Mix0_5d_c112592/f1p1/2435	1	2089	Chr16	-	26763385	26789871	MD16G1245400,MD16G1245300	85.7	2090	2437	Chr09	+	16236842	16237189	notsure	14.3
i1_HQ_Mix0_5d_c71859/f29p0/1977	1	1748	Chr10	-	17574272	17576043	notsure	88.4	1749	1978	Chr10	+	15640346	15640576	notsure	11.6
i2_LQ_Mix0_5d_c82316/f1p48/2311	17	2038	Chr15	+	3274099	3278118	notsure	87.5	2039	2312	Chr15	-	16410114	16410387	MD15G1206700	11.9
i1_LQ_Mix0_5d_c53592/f1p0/1061	2	526	Chr09	+	10241225	10242681	MD09G1133500	49.5	527	1060	Chr02	+	13251993	13252520	notsure	50.4
i2_LQ_Mix0_5d_c151790/f1p9/2280	1	457	Chr00	-	50127816	50129214	MD00G1205700	20	458	2284	Chr08	-	12294793	12301701	MD08G1130500	80
i3_LQ_Mix0_5d_c29221/f1p0/3091	1	1641	Chr13	-	38739531	38744828	MD13G1277900	53	1642	3097	Chr00	-	51397142	51399334	MD00G1214800	47
i2_LQ_Mix0_5d_c80783/f1p30/2308	1	936	Chr16	+	38914864	38915799	MD16G1283000	40.6	937	2308	Chr13	-	3186893	3188254	MD13G1046100	59.4
i3_LQ_Mix0_5d_c16763/f1p10/3139	1	439	Chr07	-	23939977	23940499	notsure	13.9	440	3148	Chr02	+	14043267	14048308	MD02G1164400,MD02G1164500	86.1
i3_LQ_Mix0_5d_c29004/f1p0/3530	1	2134	Chr14	+	3863072	3866826	MD14G1041100,MD14G1041000	59	2135	3619	Chr12	+	4641556	4645171	MD12G1041900	41
i2_HQ_Mix0_5d_c20759/f4p11/2604	1	614	Chr07	-	31310676	31313041	MD07G1242700	23.6	615	2597	Chr16	+	6910303	6914261	MD16G1099100	76.4
i1_LQ_Mix0_5d_c105744/f1p0/1067	1	375	Chr11	+	560437	561204	MD11G1005900	35.1	376	1067	Chr05	+	46451317	46452534	MD05G1344600	64.7
i1_LQ_Mix0_5d_c16639/f3p8/1530	11	222	Chr15	+	21161528	21161728	notsure	13.8	223	1532	Chr08	+	26177745	26180848	MD08G1202000	85.5
i3_LQ_Mix0_5d_c5916/f1p8/3085	1	2712	Chr10	-	40607246	40611862	MD10G1325700	87.9	2713	3087	Chr05	-	46832311	46832758	MD05G1351300	12.1
i2_LQ_Mix0_5d_c10036/f1p7/2744	24	2019	Chr03	-	31883556	31947031	MD03G1233600,MD03G1233700,MD03G1233800,MD03G1233200,MD03G1233300	72.7	2020	2744	Chr03	-	29194795	29195650	MD03G1212700	26.4
i2_HQ_Mix0_5d_c156698/f4p14/2649	1	308	Chr00	-	10021802	10022170	MD00G1053600	11.6	309	2650	Chr17	-	14584690	14739528	MD17G1154300,MD17G1154500,MD17G1154400	88.3
i1_LQ_Mix0_5d_c34511/f1p5/1930	2	790	Chr15	+	36293549	36296954	MD15G1329600	40.9	791	1931	Chr17	+	20278567	20279707	notsure	59.1
i2_LQ_Mix0_5d_c94217/f1p3/2480	1	2002	Chr02	+	2905669	2908422	MD02G1038200	80.3	2003	2492	Chr00	+	4453947	4454719	MD00G1025600	19.7
i2_LQ_Mix0_5d_c95983/f1p7/2775	8	564	Chr03	+	37044306	37045608	MD03G1294100	20	565	2777	Chr00	-	42103486	42107260	MD00G1179500	79.6
i2_LQ_Mix0_5d_c41041/f1p2/2041	1	621	Chr01	-	28058578	28059198	notsure	30.3	622	2052	Chr03	-	32174625	32176067	MD03G1236100	69.7
i3_LQ_Mix0_5d_c23933/f1p0/3906	1	3146	Chr01	+	13607746	13611123	MD01G1040300	80.4	3147	3915	Chr02	+	24082548	24083318	notsure	19.6
i3_LQ_Mix0_5d_c17421/f1p0/3538	2	443	Chr07	-	23939977	23940499	notsure	12.5	444	3532	Chr02	+	14043267	14048288	MD02G1164400,MD02G1164500	87.4
i2_LQ_Mix0_5d_c16561/f1p8/2446	15	1732	Chr09	-	1418139	1432071	MD09G1024000	70	1733	2456	Chr09	+	2890095	2891423	MD09G1044600	29.5
i1_HQ_Mix0_5d_c112682/f3p6/1903	1	1067	Chr16	+	1091894	1092962	MD16G1014100	56	1068	1904	Chr13	-	2627145	2627977	MD13G1038800	43.9
i1_LQ_Mix0_5d_c100722/f1p1/1782	1	470	Chr09	+	18379652	18380487	notsure	26.3	471	1784	Chr06	-	24644207	24646582	MD06G1106900	73.4
i2_HQ_Mix0_5d_c16119/f17p9/2845	16	638	Chr10	+	33314982	33315604	MD10G1236700	21.9	639	2843	Chr05	+	38745437	38748174	MD05G1256300	77.6
i2_LQ_Mix0_5d_c80999/f1p11/2398	1	1206	Chr17	+	28105042	28107434	MD17G1232800	50.3	1207	2397	Chr13	-	3281558	3282748	notsure	49.7
i1_LQ_Mix0_5d_c32756/f1p0/1283	1	572	Chr00	+	1416869	1417451	MD00G1011700	44.4	573	1289	Chr15	-	25514044	25542397	MD15G1282500,MD15G1282700,MD15G1282600	55.6
i1_LQ_Mix0_5d_c62790/f1p10/1962	1	377	Chr00	-	50127816	50129134	MD00G1205700	19.1	378	1975	Chr08	-	12295074	12301701	MD08G1130500	80.9
i2_HQ_Mix0_5d_c144249/f5p8/2726	1	1133	Chr06	-	30067114	30071780	MD06G1159100	41.5	1134	2727	Chr07	-	6926072	6927844	notsure	58.5
i2_LQ_Mix0_5d_c17526/f1p5/2634	1	979	Chr09	-	1430883	1432132	MD09G1024000	37	980	2646	Chr09	+	2957419	2959274	MD09G1045400	63
i3_LQ_Mix0_5d_c18648/f1p47/3382	13	3002	Chr11	+	38410527	38452761	MD11G1268500,MD11G1268400,MD11G1268600,MD11G1268300,MD11G1268200	88.3	3003	3379	Chr16	-	24199913	24201153	notsure	11.1
i2_LQ_Mix0_5d_c152247/f1p2/2925	2	2464	Chr14	+	30222197	30226523	MD14G1220000	81.4	2465	3027	Chr08	+	11537073	11537844	notsure	18.6
i2_LQ_Mix0_5d_c24491/f1p30/3088	1	2249	Chr17	-	28864359	28868654	MD17G1239400	72.7	2250	3081	Chr09	-	31568221	31569206	MD09G1246500	26.9
i2_LQ_Mix0_5d_c167680/f2p22/2662	1	562	Chr12	+	11067725	11068412	notsure	21.2	563	2645	Chr17	-	14584700	14598281	MD17G1154300	78.4
i2_LQ_Mix0_5d_c65137/f1p16/2856	2	435	Chr13	-	7454645	7455078	MD13G1104300	15.2	436	2856	Chr16	-	7307943	7311375	MD16G1104400	84.8
i3_LQ_Mix0_5d_c28804/f1p0/3585	3	1400	Chr04	-	20783538	20785227	MD04G1122100	36.9	1401	3786	Chr17	+	23548691	23555445	MD17G1196600	62.9
i1_LQ_Mix0_5d_c35477/f1p15/1734	1	802	Chr12	+	27472721	27474059	MD12G1192800	46.2	803	1736	Chr04	+	26874156	26875361	MD04G1177400	53.8
i2_HQ_Mix0_5d_c57233/f41p42/2834	1	355	Chr00	-	37676577	37677518	notsure	12.5	356	2835	Chr11	-	13286871	13291697	MD11G1142500	87.5
i2_LQ_Mix0_5d_c4631/f1p15/2389	1	616	Chr05	-	27616036	27616651	MD05G1144500	25.8	617	2386	Chr10	-	23080756	23084751	MD10G1143800	74.2
i2_HQ_Mix0_5d_c62655/f2p13/2208	3	730	Chr05	+	36260972	36261686	notsure	32.9	731	2211	Chr00	+	16037254	16045699	MD00G1080100	67
i3_LQ_Mix0_5d_c20684/f1p12/4042	1	647	Chr16	+	11411991	11414851	MD16G1146200	15.5	648	4185	Chr05	-	44770697	44775265	MD05G1320400,MD05G1320300	84.5
i1_LQ_Mix0_5d_c9611/f1p11/1750	1	241	Chr02	+	30739041	30739281	notsure	13.7	242	1753	Chr02	+	36604858	36606365	notsure	86.3
i2_LQ_Mix0_5d_c33574/f1p5/2885	1	2437	Chr15	-	4246657	4251287	MD15G1062000	83.9	2438	2881	Chr08	-	5972950	5973363	MD08G1074100	15.3
i1_LQ_Mix0_5d_c49983/f1p0/1789	1	1573	Chr06	+	36457017	36459224	MD06G1233300	87.2	1574	1801	Chr14	+	31902460	31902679	MD14G1240100	12.6
i2_LQ_Mix0_5d_c113479/f1p6/2723	3	1477	Chr05	+	22039497	22041259	MD05G1107100	54	1478	2724	Chr05	+	44840516	44842313	MD05G1321100	45.7
i2_LQ_Mix0_5d_c87046/f1p0/2033	9	285	Chr16	-	18455229	18455504	MD16G1202800	13.6	286	2036	Chr10	-	35948896	35952243	MD10G1266500	86
i0_LQ_Mix0_5d_c4104/f1p2/844	1	426	Chr09	+	14745596	14746197	MD09G1173900	50.5	427	844	Chr04	+	3898940	3900708	MD04G1034800	49.5
i2_LQ_Mix0_5d_c97562/f1p1/2130	2	1064	Chr16	+	38918397	38919459	MD16G1283000	49.9	1065	2132	Chr00	-	48263538	48264605	MD00G1202200	50.1
i2_LQ_Mix0_5d_c21892/f1p3/2286	1	1888	Chr15	-	28029871	28033069	MD15G1297600,MD15G1297500	82.3	1889	2292	Chr10	+	19255837	19256240	notsure	17.6
i1_HQ_Mix0_5d_c63804/f3p0/1777	4	539	Chr09	-	30887753	30888884	MD09G1241600	30.2	540	1776	Chr17	-	28299185	28324203	MD17G1234200,MD17G1234300	69.7
i1_LQ_Mix0_5d_c11487/f1p1/1518	1	436	Chr10	-	29806825	29808084	MD10G1199900	28.6	437	1526	Chr05	-	35755574	35763608	MD05G1225000	71.4
i2_LQ_Mix0_5d_c137470/f1p13/2381	1	1808	Chr15	+	2311521	2314803	MD15G1033000	75.9	1809	2381	Chr08	+	25430593	25431385	notsure	24.1
i2_LQ_Mix0_5d_c134481/f1p1/2728	1	756	Chr08	-	24120563	24121319	notsure	26.7	757	2828	Chr00	-	30873490	30875760	MD00G1141700	73.3
i2_LQ_Mix0_5d_c82210/f1p4/2310	1	401	Chr15	+	2314568	2314968	MD15G1033000	17.3	402	2312	Chr08	+	25430010	25432051	notsure	82.7
i2_LQ_Mix0_5d_c82090/f1p1/2766	1	654	Chr12	-	23676684	23677338	MD12G1156200	23.6	655	2766	Chr16	-	8525741	8527852	notsure	76.4
i1_LQ_Mix0_5d_c23980/f1p0/1195	1	832	Chr16	+	38918635	38919465	MD16G1283000	69.5	833	1196	Chr00	-	48264235	48264599	MD00G1202200	30.4
i1_HQ_Mix0_5d_c34181/f2p0/1358	1	734	Chr13	+	25757227	25759062	MD13G1245600	54	735	1360	Chr00	+	45201325	45202573	MD00G1189400	46
i3_LQ_Mix0_5d_c4303/f1p0/3134	1	1172	Chr14	+	1054976	1058242	MD14G1010800	35.3	1173	3324	Chr11	+	4678916	4683207	MD11G1054900	64.7
i3_LQ_Mix0_5d_c29341/f1p0/3687	2	1614	Chr14	-	28264501	28267330	MD14G1191600	43.7	1615	3695	Chr05	+	4306570	4314805	MD05G1027200	56.3
i1_LQ_Mix0_5d_c157580/f1p0/1618	1	1333	Chr00	+	20513036	20519209	MD00G1098500	82.3	1334	1619	Chr04	+	30569580	30569865	notsure	17.7
i1_HQ_Mix0_5d_c81958/f2p2/1827	1	639	Chr01	+	24945105	24946563	MD01G1139900	35	640	1828	Chr13	+	5838681	5839870	MD13G1083400	65
i2_LQ_Mix0_5d_c63464/f1p1/2187	9	589	Chr12	+	9108253	9109413	MD12G1075200	26.6	590	2187	Chr12	-	9733046	9735475	MD12G1079800	73.1
i2_LQ_Mix0_5d_c117014/f1p3/2356	1	413	Chr03	+	24879483	24925753	MD03G1181900,MD03G1181400,MD03G1182300,MD03G1181700,MD03G1182000,MD03G1181600,MD03G1182500,MD03G1181500	17.5	414	2359	Chr07	+	11910087	11912588	MD07G1105200	82.5
i1_HQ_Mix0_5d_c5618/f5p2/1311	1	1059	Chr02	-	1345493	1348401	MD02G1018200	80.7	1060	1312	Chr12	+	20477420	20477672	notsure	19.3
i2_LQ_Mix0_5d_c179565/f1p0/2007	2	1797	Chr01	-	20170986	20172781	MD01G1088700	89.5	1798	2006	Chr07	-	23355772	23355980	notsure	10.4
i3_LQ_Mix0_5d_c7240/f1p0/3345	1	2426	Chr02	+	7844098	7847043	MD02G1099000	72.5	2427	3331	Chr02	-	8065090	8066278	MD02G1100800	27
i1_LQ_Mix0_5d_c169837/f1p0/1309	1	147	Chr15	-	39093729	39093878	notsure	10.9	148	1353	Chr11	+	5530338	5557474	MD11G1064100,MD11G1064500,MD11G1064200,MD11G1064600,MD11G1064300,MD11G1064000	89.1
i4_LQ_Mix0_5d_c8444/f1p0/4770	1	3792	Chr09	+	2938117	2953594	MD09G1045100,MD09G1045300	79.4	3793	4766	Chr09	-	1417616	1476281	MD09G1024200,MD09G1024100,MD09G1024500,MD09G1024000,MD09G1024400,MD09G1023800,MD09G1024300	20.4
i3_LQ_Mix0_5d_c24107/f1p81/3334	4	2930	Chr08	-	22051631	22056903	MD08G1178900	87.7	2931	3336	Chr17	+	6894485	6894890	notsure	12.2
i1_LQ_Mix0_5d_c48370/f1p18/1697	2	431	Chr05	-	38381159	38382905	MD05G1252200	25	432	1721	Chr15	+	25205364	25207314	MD15G1281700	75
i1_LQ_Mix0_5d_c130758/f1p6/1891	1	825	Chr16	+	38918635	38919459	MD16G1283000	43.6	826	1892	Chr00	-	48263538	48264605	MD00G1202200	56.4
i3_LQ_Mix0_5d_c9984/f1p15/3258	1	474	Chr05	+	36025180	36025642	notsure	14.5	475	3261	Chr05	+	45608475	45613480	MD05G1332600	85.5
i0_LQ_Mix0_5d_c3763/f1p2/789	4	570	Chr08	-	3132503	3133069	notsure	71.2	571	795	Chr13	-	26714057	26714289	notsure	28.3
i3_LQ_Mix0_5d_c33811/f1p11/3618	2	3217	Chr08	-	5402901	5407330	notsure	88	3218	3653	Chr12	+	31906124	31906650	MD12G1249700	11.9
i2_HQ_Mix0_5d_c22968/f2p18/2294	1	1717	Chr15	+	2311491	2314803	MD15G1033000	74.8	1718	2296	Chr08	+	25430593	25431391	notsure	25.2
i1_LQ_Mix0_5d_c47774/f1p56/1281	2	251	Chr04	-	23323453	23323709	notsure	19.5	252	1285	Chr09	+	17458389	17461484	MD09G1194300	80.5
i1_LQ_Mix0_5d_c36438/f2p4/2039	1	1773	Chr00	-	50796504	50800387	MD00G1208500,MD00G1208400	84.6	1774	2096	Chr05	-	47947472	47947915	MD05G1364600	15.4
i3_LQ_Mix0_5d_c17413/f1p0/3511	1	480	Chr07	-	23939977	23940543	notsure	13.6	481	3521	Chr02	+	14043267	14048328	MD02G1164400,MD02G1164500	86.4
i2_LQ_Mix0_5d_c136886/f1p7/3104	2	2195	Chr15	-	2838809	2844490	MD15G1040300,MD15G1040200,MD15G1040400	70.6	2196	3107	Chr08	+	4460075	4461578	MD08G1057200	29.4
i2_LQ_Mix0_5d_c97652/f1p51/2229	1	1871	Chr15	-	50668282	50670726	MD15G1406000	83.9	1872	2229	Chr08	-	28069453	28069811	MD08G1218200	16.1
i3_LQ_Mix0_5d_c8793/f1p11/3159	1	1935	Chr09	+	6625710	6628420	MD09G1090600	62.7	1936	3080	Chr17	+	6608302	6610373	MD17G1079800	37.1
i2_LQ_Mix0_5d_c82637/f1p412/3079	1	1378	Chr13	+	8118560	8121399	MD13G1111500	44.7	1379	3080	Chr00	-	12968732	12975508	MD00G1067300	55.3
i1_LQ_Mix0_5d_c34688/f2p0/1836	1	1484	Chr08	-	26165368	26171474	MD08G1201800	80.5	1485	1843	Chr10	-	7311962	7312315	notsure	19.5
i2_LQ_Mix0_5d_c65253/f1p19/2473	1	419	Chr13	-	7454645	7455064	MD13G1104300	16.9	420	2474	Chr16	-	7308311	7311375	MD16G1104400	83.1
i3_LQ_Mix0_5d_c3180/f1p5/3172	1	2051	Chr14	-	10290999	10293412	MD14G1084500	66.1	2052	3101	Chr02	-	33581676	33582724	notsure	33.9
i3_LQ_Mix0_5d_c17818/f1p15/3778	1	2112	Chr13	+	123841	127145	MD13G1002000	55.7	2113	3793	Chr00	-	26964309	26971789	MD00G1127300	44.3
i0_LQ_Mix0_5d_c7570/f1p45/994	3	872	Chr11	+	2610159	2661969	MD11G1030200,MD11G1030100,MD11G1029900,MD11G1030000,MD11G1030400,MD11G1029800,MD11G1030300,MD11G1029700	84.6	873	1028	Chr00	-	38649143	38649294	MD00G1168200	15.2
i2_LQ_Mix0_5d_c151528/f1p1/2216	2	2007	Chr14	+	24871364	24874703	notsure	89.6	2008	2240	Chr02	+	33723742	33723974	notsure	10.4
i1_LQ_Mix0_5d_c116389/f1p0/1429	1	171	Chr10	-	10710409	10710579	notsure	11.9	172	1433	Chr12	-	3069149	3072496	MD12G1027300	88.1
i3_LQ_Mix0_5d_c20944/f1p2/3580	1	3144	Chr06	+	709002	713698	MD06G1006800	86.9	3145	3619	Chr16	-	10745179	10745653	MD16G1139600	13.1
i3_LQ_Mix0_5d_c12314/f1p35/3098	1	577	Chr03	+	37044283	37045608	MD03G1294100	18.6	578	3107	Chr00	-	42103495	42107260	MD00G1179500	81.4
i1_LQ_Mix0_5d_c47964/f1p1/1939	1	1723	Chr05	+	37126716	37129422	MD05G1240600	88.7	1724	1942	Chr10	+	40953599	40953817	notsure	11.3
i2_LQ_Mix0_5d_c135982/f1p0/2800	1	2294	Chr05	+	13562735	13565019	MD05G1070100	81.9	2295	2800	Chr07	+	27061219	27061727	notsure	18.1
i3_LQ_Mix0_5d_c11066/f1p3/3650	7	3257	Chr00	-	42226646	42229935	notsure	88.9	3258	3657	Chr07	-	1429323	1429734	notsure	10.9
i1_LQ_Mix0_5d_c66655/f1p15/1680	10	1138	Chr15	+	2312436	2314803	MD15G1033000	67.1	1139	1682	Chr08	+	25430593	25431356	notsure	32.3
i1_LQ_Mix0_5d_c114943/f1p7/1962	4	1435	Chr07	-	32216006	32220015	MD07G1254900	72.9	1436	1963	Chr02	+	13252000	13252521	notsure	26.9
i2_LQ_Mix0_5d_c50636/f1p5/2391	1	2048	Chr01	+	23535939	23538907	MD01G1122100	85.7	2049	2391	Chr07	+	27148938	27149280	MD07G1191600	14.3
i2_LQ_Mix0_5d_c142400/f1p19/2039	1	1628	Chr09	-	11049290	11071889	MD09G1141500,MD09G1141400,MD09G1141300,MD09G1141700,MD09G1141200,MD09G1141600	80	1629	2035	Chr08	-	2351364	2351769	notsure	20
i2_LQ_Mix0_5d_c26678/f1p27/2035	1	1720	Chr13	-	11574491	11581137	MD13G1148100	84.5	1721	2035	Chr03	+	8407588	8407902	notsure	15.5
i1_LQ_Mix0_5d_c107774/f1p0/1930	1	593	Chr16	+	38918599	38919190	MD16G1283000	30.7	594	1931	Chr00	-	48263538	48390338	MD00G1202400,MD00G1202600,MD00G1202200,MD00G1202700,MD00G1202300,MD00G1202800	69.3
i2_LQ_Mix0_5d_c97052/f1p10/2493	7	1972	Chr00	-	15976501	15995621	MD00G1079300,MD00G1079200,MD00G1079500,MD00G1079400	79	1973	2489	Chr12	-	25063315	25064422	MD12G1169200	20.8
i3_LQ_Mix0_5d_c29621/f1p0/3151	14	545	Chr10	-	9502281	9509209	notsure	16.9	546	3139	Chr17	+	19410168	19413875	MD17G1174500	82.6
i3_LQ_Mix0_5d_c18712/f1p0/3502	1	619	Chr16	+	23629025	23629652	notsure	17.7	620	3505	Chr15	+	10981491	10984760	MD15G1148400	82.3
i2_LQ_Mix0_5d_c130351/f1p4/2305	3	250	Chr12	+	6876989	6878327	MD12G1058900	10.8	251	2304	Chr14	-	6082574	6086154	MD14G1059100	89.1
i1_LQ_Mix0_5d_c71691/f1p0/1179	1	980	Chr06	-	25647428	25649161	MD06G1117700	82.9	981	1182	Chr12	-	719721	719938	notsure	17.1
i1_LQ_Mix0_5d_c44272/f1p0/1299	1	576	Chr03	+	23355898	23356911	notsure	44.2	577	1302	Chr10	+	23180719	23182856	MD10G1145400	55.8
i0_LQ_Mix0_5d_c8326/f1p50/507	1	241	Chr16	+	38917257	38917498	MD16G1283000	47.4	242	508	Chr05	-	45237079	45237353	MD05G1326200	52.6
i3_LQ_Mix0_5d_c19925/f1p0/3503	29	950	Chr11	+	4361514	4362437	MD11G1050800	25.9	951	3563	Chr11	-	4071157	4079410	MD11G1047000,MD11G1046900,MD11G1046800	73.3
i3_LQ_Mix0_5d_c17120/f1p0/3573	1	478	Chr12	+	27336249	27336727	MD12G1190700	14.9	479	3202	Chr04	+	26716715	26719415	MD04G1176400	85
i1_HQ_Mix0_5d_c19905/f10p2/2004	3	1791	Chr11	+	12340661	12347418	MD11G1134400	89.3	1792	2004	Chr03	+	10375557	10375769	MD03G1116200	10.6
i1_LQ_Mix0_5d_c82991/f1p1/1997	11	480	Chr10	-	9502281	9509148	notsure	23.5	481	2002	Chr17	+	19410168	19413432	MD17G1174500	76
i3_LQ_Mix0_5d_c11093/f6p0/3587	1	441	Chr07	-	23939977	23940499	notsure	12.3	442	3574	Chr02	+	14043267	14048336	MD02G1164400,MD02G1164500	87.3
i2_LQ_Mix0_5d_c23808/f1p8/2293	1	1830	Chr15	+	2311525	2314803	MD15G1033000	79.8	1831	2293	Chr08	+	25430593	25443333	notsure	20.2
i2_LQ_Mix0_5d_c34445/f1p0/2230	1	919	Chr00	+	4071432	4073157	MD00G1024900	41.2	920	2233	Chr14	+	32150226	32151868	notsure	58.8
i2_LQ_Mix0_5d_c10198/f3p2/2948	3	2271	Chr14	+	13704541	13710251	MD14G1092100	76.7	2272	2960	Chr14	-	15475018	15475707	notsure	23.3
i2_HQ_Mix0_5d_c42089/f4p5/2170	1	316	Chr04	-	23248682	23249357	MD04G1142800	14.6	317	2171	Chr15	-	30314776	30319510	MD15G1306500	85.4
i2_LQ_Mix0_5d_c133003/f1p14/2187	1	672	Chr05	+	36261028	36261686	notsure	30.7	673	2190	Chr00	+	16037254	16045700	MD00G1080100	69.3
i2_LQ_Mix0_5d_c151383/f1p1/2332	19	773	Chr03	+	30669905	30671247	MD03G1222400	32.4	774	2330	Chr11	+	34843480	34845669	MD11G1239700	66.8
i1_LQ_Mix0_5d_c101000/f1p25/2014	1	1461	Chr15	+	2311519	2314803	MD15G1033000	72.4	1462	2018	Chr08	+	25430593	25431369	notsure	27.6
i1_HQ_Mix0_5d_c45497/f2p0/1222	1	1001	Chr10	-	17574272	17575976	notsure	81.4	1002	1230	Chr10	+	15640346	15640575	notsure	18.6
i2_LQ_Mix0_5d_c155926/f1p2/2546	1	373	Chr12	-	3803860	3804261	notsure	13.9	374	2678	Chr16	-	24939751	24952349	MD16G1237000	86.1
i3_LQ_Mix0_5d_c22678/f1p0/3596	1	3221	Chr15	+	19920235	19923415	notsure	88.8	3222	3613	Chr12	-	31831470	31832060	MD12G1248400	10.8
i2_LQ_Mix0_5d_c118858/f1p12/3070	1	2028	Chr16	-	23962546	23971391	MD16G1233000,MD16G1232900	65.8	2029	3078	Chr14	-	2702765	3170547	MD14G1032300,MD14G1035300,MD14G1032900,MD14G1035200,MD14G1034500,MD14G1034400,MD14G1034600,MD14G1032800,MD14G1035000,MD14G1033300,MD14G1034700,MD14G1033200,MD14G1034300,MD14G1031900,MD14G1034800,MD14G1034900,MD14G1033400,MD14G1033800,MD14G1031100,MD14G1032600,MD14G1032700,MD14G1034200,MD14G1035500,MD14G1032500,MD14G1034100,MD14G1032200,MD14G1031400,MD14G1033100,MD14G1031200,MD14G1033000	34.1
i2_HQ_Mix0_5d_c108516/f12p1/2295	8	368	Chr05	+	29909677	29910404	MD05G1169200	15.7	369	2301	Chr10	+	24609619	24612394	MD10G1157500	84
i3_HQ_Mix0_5d_c2907/f2p0/3386	1	2829	Chr16	-	26690703	26789844	MD16G1245400,MD16G1245300,MD16G1245200	83.5	2830	3383	Chr00	-	26536067	26546374	notsure	16.3
i2_LQ_Mix0_5d_c112302/f1p8/2266	1	1219	Chr11	+	260601	261895	MD11G1003200	53.7	1220	2270	Chr04	-	26270471	26271524	notsure	46.3
i3_LQ_Mix0_5d_c6259/f1p0/3332	1	2323	Chr16	+	38917139	38919448	MD16G1283000	68.5	2324	3392	Chr00	-	48263536	48264616	MD00G1202200	31.5
i2_LQ_Mix0_5d_c151330/f1p84/2820	1	358	Chr16	+	38917139	38917496	MD16G1283000	12.4	359	2875	Chr17	-	5900950	5904138	MD17G1073400	87.5
i2_LQ_Mix0_5d_c114916/f1p13/2377	1	711	Chr05	+	36260989	36261686	notsure	29.8	712	2381	Chr00	+	16037254	16045694	MD00G1080100	70.1
i2_HQ_Mix0_5d_c33829/f3p23/2453	1	2006	Chr15	+	2689629	2693810	MD15G1038500	81.9	2007	2449	Chr08	-	4628115	4629734	MD08G1057600	18.1
i1_LQ_Mix0_5d_c97003/f1p3/1710	1	1522	Chr08	-	5883807	5885346	MD08G1072700	88.5	1523	1720	Chr10	-	38506792	38506989	notsure	11.5
i1_LQ_Mix0_5d_c140651/f1p2/1268	11	1031	Chr01	-	23497208	23499145	MD01G1121300	80.4	1032	1270	Chr07	-	27079205	27079443	MD07G1190900	18.8
i1_LQ_Mix0_5d_c139176/f1p0/1568	1	1460	Chr01	-	11929108	11934173	MD01G1035100	88.1	1461	1656	Chr15	+	33344519	33344713	MD15G1320800	11.8
i2_LQ_Mix0_5d_c135917/f1p4/2112	2	789	Chr07	-	2599458	2600242	MD07G1032000	37.3	790	2113	Chr02	+	34943196	34944519	MD02G1294400,MD02G1294500	62.7
i1_LQ_Mix0_5d_c78641/f1p1/1702	1	689	Chr15	+	19759319	19763058	MD15G1240100	40.2	690	1712	Chr05	+	38817690	38839145	MD05G1257200,MD05G1257300	59.7
i3_LQ_Mix0_5d_c25080/f1p0/3039	1	2089	Chr02	+	1588513	1593385	MD02G1022800	67.8	2090	3072	Chr11	+	15699055	15700039	MD11G1160100	31.9
i2_LQ_Mix0_5d_c87088/f1p51/2092	3	565	Chr05	-	16295979	16296541	MD05G1076000	26.8	566	2100	Chr05	-	45807081	45810029	MD05G1335400	73.1
i2_HQ_Mix0_5d_c64754/f3p3/2619	1	1123	Chr11	-	42990629	42994166	MD11G1318000	42.9	1124	2619	Chr00	+	8480245	8482609	notsure	57.1
i3_LQ_Mix0_5d_c21304/f1p51/3280	1	2704	Chr02	-	26216061	26231583	MD02G1223800,MD02G1223900	82.7	2705	3270	Chr13	-	10639470	10641073	MD13G1138300	17.3
i2_HQ_Mix0_5d_c98184/f2p9/3095	1	340	Chr16	-	8664102	8664940	MD16G1120800	11	341	3094	Chr13	-	8869401	8872154	MD13G1120800	89
i0_LQ_Mix0_5d_c7860/f1p4/965	1	864	Chr16	-	1527356	1529278	MD16G1021400	90	865	960	Chr04	+	27870908	27871003	notsure	10
i2_LQ_Mix0_5d_c115158/f1p5/2783	1	1369	Chr14	-	23836340	23838634	MD14G1145500	49.1	1370	2786	Chr07	-	2954952	2956451	notsure	50.9
i1_LQ_Mix0_5d_c98907/f1p11/1523	1	1331	Chr11	-	7301435	7404274	MD11G1088000,MD11G1087000,MD11G1088100,MD11G1088200,MD11G1088600,MD11G1087500,MD11G1088300,MD11G1087100,MD11G1089000	87.3	1332	1525	Chr17	+	13882912	13883105	notsure	12.7
i1_LQ_Mix0_5d_c164068/f1p0/1149	1	915	Chr10	-	17574272	17575210	notsure	80	916	1139	Chr10	+	15640346	15640571	notsure	19.6
i3_LQ_Mix0_5d_c16735/f1p18/3895	1	2441	Chr09	-	10189218	10374747	MD09G1133600,MD09G1134500,MD09G1132800,MD09G1133200,MD09G1134800,MD09G1134700,MD09G1133300,MD09G1132700,MD09G1134000,MD09G1133800,MD09G1135000,MD09G1133400,MD09G1133000,MD09G1132900	62.5	2442	3907	Chr17	-	10768862	10772221	MD17G1124000	37.5
i2_LQ_Mix0_5d_c46482/f1p7/2593	1	1595	Chr14	+	29699507	29892423	MD14G1212800,MD14G1214100,MD14G1215200,MD14G1214800,MD14G1212200,MD14G1214200,MD14G1215100,MD14G1212600,MD14G1212300,MD14G1214300,MD14G1213000,MD14G1211900,MD14G1213400,MD14G1212000,MD14G1212400,MD14G1213800	61.5	1596	2592	Chr06	-	33594584	33595982	MD06G1202800	38.5
i2_LQ_Mix0_5d_c116243/f1p7/2788	1	578	Chr03	+	37044283	37045608	MD03G1294100	20.7	579	2790	Chr00	-	42103487	42107260	MD00G1179500	79.3
i2_LQ_Mix0_5d_c13670/f1p0/2128	4	487	Chr11	-	15099888	15100860	MD11G1157000	22.5	488	2152	Chr00	+	41409779	41549904	MD00G1178100,MD00G1177800	77.3
i2_LQ_Mix0_5d_c41171/f1p18/2176	1	1729	Chr15	+	2311585	2314803	MD15G1033000	79.4	1730	2178	Chr08	+	25430593	25431263	notsure	20.6
i3_LQ_Mix0_5d_c29529/f1p0/3118	1	1995	Chr10	+	25160953	25163830	MD10G1161200	62.6	1996	3188	Chr11	+	24655161	24656357	notsure	37.4
i3_LQ_Mix0_5d_c16355/f1p8/3655	28	1234	Chr11	-	21283414	21286764	notsure	30	1235	4026	Chr06	+	575366	580369	MD06G1005100	69.3
i2_LQ_Mix0_5d_c79416/f1p39/2565	3	359	Chr02	-	32032639	32034214	MD02G1266200	13.9	360	2568	Chr07	+	4969683	4971896	MD07G1053800	86
i3_LQ_Mix0_5d_c8007/f1p5/3259	1	1644	Chr06	-	30067114	30071780	MD06G1159100	50.3	1645	3266	Chr07	-	6926043	6927844	notsure	49.7
i2_LQ_Mix0_5d_c18569/f1p100/2429	1	1899	Chr15	-	50668282	50670754	MD15G1406000	78.1	1900	2430	Chr08	-	28069281	28069811	MD08G1218200	21.9
i3_LQ_Mix0_5d_c32872/f1p0/3482	1	449	Chr14	+	870606	871036	notsure	12.9	450	3474	Chr14	+	32157503	32164180	MD14G1243200	86.7
i1_LQ_Mix0_5d_c48877/f1p0/1824	1	1310	Chr15	-	10448336	10449858	MD15G1141700	71.8	1311	1825	Chr16	+	14060899	14064076	notsure	28.2
i1_HQ_Mix0_5d_c48293/f2p17/1997	5	304	Chr06	-	22946371	22946663	MD06G1095700	15	305	2001	Chr14	-	18815825	18818603	MD14G1115700	84.8
i5_LQ_Mix0_5d_c2267/f1p0/5519	1	4967	Chr13	+	20077693	20082639	notsure	89.4	4968	5557	Chr14	+	25545393	25546334	MD14G1161000	10.6
i3_LQ_Mix0_5d_c17216/f1p8/3888	2	1459	Chr07	+	1507575	1510026	MD07G1017400	37.3	1460	3908	Chr03	-	36072881	36569343	MD03G1279500,MD03G1283700,MD03G1282900,MD03G1281400,MD03G1285200,MD03G1282800,MD03G1282100,MD03G1279600,MD03G1284300,MD03G1284200,MD03G1283000,MD03G1282700,MD03G1285700,MD03G1284700,MD03G1279700,MD03G1285500,MD03G1281200,MD03G1282400,MD03G1280000,MD03G1279100,MD03G1281000,MD03G1280300,MD03G1279000,MD03G1283200,MD03G1280200,MD03G1286200,MD03G1283300,MD03G1279200,MD03G1286100,MD03G1282300,MD03G1279…	62.7
i1_LQ_Mix0_5d_c98408/f1p25/1295	1	896	Chr03	-	31551389	31552284	notsure	68.8	897	1302	Chr10	-	11136943	11137434	notsure	31.2
i1_HQ_Mix0_5d_c46635/f2p0/1509	1	800	Chr13	-	42956728	43049522	MD13G1284800	52.9	801	1512	Chr09	+	15350040	15370860	MD09G1179200,MD09G1179500,MD09G1179600	47.1
i3_LQ_Mix0_5d_c16198/f1p5/3315	1	2128	Chr09	+	18098014	18103321	MD09G1198500	64.8	2129	3286	Chr02	+	36287879	36289082	notsure	35.2
i1_LQ_Mix0_5d_c65369/f1p0/1472	1	1316	Chr03	-	6932888	6938368	MD03G1085500	89.3	1317	1473	Chr00	-	552311	552467	notsure	10.7
i2_LQ_Mix0_5d_c95309/f1p9/2208	3	1729	Chr15	+	2311581	2314803	MD15G1033000	78.2	1730	2209	Chr08	+	25430593	25431294	notsure	21.7
i2_LQ_Mix0_5d_c165651/f1p53/2646	1	312	Chr00	-	10021802	10022174	MD00G1053600	11.8	313	2646	Chr17	-	14584696	14739528	MD17G1154300,MD17G1154500,MD17G1154400	88.2
i2_LQ_Mix0_5d_c4774/f1p1/2713	1	277	Chr04	+	21466217	21466493	notsure	10.2	278	2721	Chr17	-	8562271	8568546	MD17G1101100	89.8
i2_LQ_Mix0_5d_c67244/f1p13/2224	11	645	Chr07	+	5560395	5561029	MD07G1059900	28.5	646	2226	Chr13	-	3867128	3869699	MD13G1055300,MD13G1055200	71
i1_LQ_Mix0_5d_c78168/f1p0/1648	1	1109	Chr09	+	18100632	18103321	MD09G1198500	67.1	1110	1653	Chr02	+	36287879	36288422	notsure	32.9
i2_LQ_Mix0_5d_c113190/f1p9/2282	1	457	Chr00	-	50127816	50129214	MD00G1205700	20	458	2271	Chr08	-	12264218	12301701	MD08G1130500,MD08G1130400	79.4
i2_LQ_Mix0_5d_c66983/f1p6/2520	1	501	Chr03	-	24844313	24846325	MD03G1181100,MD03G1181200	19.9	502	2502	Chr11	-	28834590	28838318	MD11G1199700,MD11G1199800	79.7
i2_LQ_Mix0_5d_c30643/f1p76/2987	20	2287	Chr16	-	3180687	3186068	notsure	75.9	2288	2979	Chr05	+	44187800	44188937	MD05G1311800	23.2
i2_LQ_Mix0_5d_c152063/f1p10/2514	3	1455	Chr17	-	1701009	1703543	MD17G1023300	57.1	1456	2543	Chr09	-	1465565	1623771	MD09G1025100,MD09G1025800,MD09G1025400,MD09G1025500,MD09G1025200,MD09G1024600,MD09G1024500,MD09G1025300,MD09G1025700,MD09G1024800,MD09G1024400,MD09G1024300,MD09G1025000,MD09G1024700	42.8
i2_LQ_Mix0_5d_c114947/f1p1/2692	1	583	Chr11	+	3087562	3088441	notsure	21.6	584	2700	Chr02	+	30309390	30313243	MD02G1251500	78.4
i4_LQ_Mix0_5d_c9502/f1p6/4997	1	1242	Chr11	+	2664284	2666300	MD11G1030500	24.8	1243	5007	Chr11	-	3724170	3970777	MD11G1044100,MD11G1045600,MD11G1043600,MD11G1045500,MD11G1044500,MD11G1043500,MD11G1044200,MD11G1045100,MD11G1044300,MD11G1044700,MD11G1043700,MD11G1045200,MD11G1044600,MD11G1045300	75.2
i2_LQ_Mix0_5d_c149539/f1p11/2316	1	1753	Chr15	+	2311576	2314803	MD15G1033000	75.4	1754	2324	Chr08	+	25430593	25431383	notsure	24.6
i2_LQ_Mix0_5d_c65180/f1p1/3026	1	2265	Chr14	+	28438652	28441102	MD14G1193400	74.8	2266	3028	Chr10	+	37150240	37151026	notsure	25.2
i1_LQ_Mix0_5d_c98322/f1p7/1920	1	474	Chr00	-	48604954	48605427	MD00G1203000	24.7	475	1920	Chr06	-	169069	171228	MD06G1001300	75.3
i2_LQ_Mix0_5d_c104752/f1p505/2059	1	1394	Chr10	+	39893983	39896081	MD10G1314900	67.7	1395	2059	Chr03	-	29047751	29048408	MD03G1211300	32.3
i1_LQ_Mix0_5d_c112054/f1p0/1922	1	827	Chr16	+	38918635	38919435	MD16G1283000	43.1	828	1918	Chr00	-	48263539	48296237	MD00G1202200	56.9
i2_LQ_Mix0_5d_c10419/f1p10/3136	1	2608	Chr04	+	30700927	30703923	MD04G1227500	83.2	2609	3135	Chr12	+	31501495	31502015	MD12G1244200	16.8
i2_HQ_Mix0_5d_c7297/f5p8/2932	2	2526	Chr01	+	28559887	28588842	MD01G1187000,MD01G1187100,MD01G1186800	86.1	2527	2932	Chr02	+	19554549	19554954	notsure	13.8
i3_HQ_Mix0_5d_c22621/f2p0/3953	1	3275	Chr11	-	7909440	7915493	MD11G1094700	82.8	3276	3955	Chr03	-	7026776	7027589	MD03G1086100	17.2
i2_LQ_Mix0_5d_c81243/f1p1/2512	1	599	Chr16	-	14905127	14905721	notsure	23.8	600	2516	Chr02	+	30309390	30406063	MD02G1251900,MD02G1252200,MD02G1252100,MD02G1251500,MD02G1252000,MD02G1251600,MD02G1252300,MD02G1251700	76.2
i3_LQ_Mix0_5d_c17730/f1p0/3273	1	2057	Chr02	+	1588563	1593385	MD02G1022800	67.4	2058	3053	Chr11	+	15699055	15700050	MD11G1160100	32.6
i2_LQ_Mix0_5d_c96295/f1p13/2912	1	444	Chr03	+	36591641	36592343	MD03G1286300	15.3	445	2911	Chr05	+	33083121	33085588	notsure	84.7
i3_LQ_Mix0_5d_c29582/f1p0/3178	2	2009	Chr16	+	223182	226460	MD16G1004000	62.6	2010	3206	Chr17	+	20913331	20914531	MD17G1180000	37.3
i2_LQ_Mix0_5d_c66883/f1p12/2968	1	434	Chr03	+	24267600	24268033	notsure	14.5	435	2994	Chr16	+	41053204	41055775	notsure	85.5
i1_LQ_Mix0_5d_c30198/f1p0/1426	1	627	Chr03	+	2474664	2476478	MD03G1030600	44.3	628	1415	Chr05	+	44840516	44842191	MD05G1321100	55.7
i3_HQ_Mix0_5d_c26788/f4p0/3077	1	767	Chr05	-	45879802	45880672	notsure	24.9	768	3075	Chr16	-	16112162	16116033	MD16G1186700	75
i2_LQ_Mix0_5d_c48900/f1p10/3175	6	2117	Chr16	-	23962546	23971346	MD16G1233000,MD16G1232900	66.6	2118	3167	Chr14	-	2702765	3170547	MD14G1032300,MD14G1035300,MD14G1032900,MD14G1035200,MD14G1034500,MD14G1034400,MD14G1034600,MD14G1032800,MD14G1035000,MD14G1033300,MD14G1034700,MD14G1033200,MD14G1034300,MD14G1031900,MD14G1034800,MD14G1034900,MD14G1033400,MD14G1033800,MD14G1031100,MD14G1032600,MD14G1032700,MD14G1034200,MD14G1035500,MD14G1032500,MD14G1034100,MD14G1032200,MD14G1031400,MD14G1033100,MD14G1031200,MD14G1033000	33.1
i2_LQ_Mix0_5d_c19346/f1p2/2477	1	1253	Chr09	+	18098014	18103321	MD09G1198500	50.4	1254	2485	Chr02	+	36287852	36289083	notsure	49.6
i2_HQ_Mix0_5d_c16401/f5p15/2461	2	1006	Chr07	+	27781123	27783247	MD07G1199400	40.8	1007	2460	Chr01	+	24438058	24439509	MD01G1134700	59.1
i1_HQ_Mix0_5d_c16812/f2p11/1571	1	635	Chr13	-	11184063	11184922	MD13G1143800	40.4	636	1572	Chr16	-	10660481	10662375	MD16G1138900	59.6
i2_LQ_Mix0_5d_c38300/f1p8/2089	1	592	Chr14	+	7887197	7889178	MD14G1071500	28.3	593	2093	Chr10	-	6150692	6154535	MD10G1046000	71.7
i3_LQ_Mix0_5d_c3775/f1p0/3542	5	597	Chr02	+	17890302	17890896	notsure	16.6	598	3583	Chr17	-	33546890	33550281	MD17G1273600	83.3
i3_LQ_Mix0_5d_c18342/f1p22/3441	1	2782	Chr15	-	2828088	2844452	MD15G1040300,MD15G1040200,MD15G1040400	78.5	2783	3515	Chr08	+	4460149	4461445	MD08G1057200	20.7
i2_LQ_Mix0_5d_c114693/f1p3/2087	11	1428	Chr03	-	1444825	1448724	MD03G1018600	70	1429	2020	Chr11	-	1676911	1678041	MD11G1019600	29.2
i1_LQ_Mix0_5d_c161946/f1p26/1433	1	414	Chr11	-	32053871	32054712	MD11G1219600	28.1	415	1475	Chr08	+	11893311	11894381	MD08G1126500	71.9
i3_HQ_Mix0_5d_c23191/f2p0/3857	1	1382	Chr08	+	16797617	16799010	notsure	35.8	1383	3862	Chr06	-	28340664	28343155	notsure	64.2
i2_LQ_Mix0_5d_c26128/f1p2/2086	1	467	Chr13	+	10635273	10637244	MD13G1138200	22.5	468	2078	Chr13	-	12241341	12244321	MD13G1156900	77.5
i2_HQ_Mix0_5d_c34570/f2p4/2684	1	2055	Chr15	+	28461422	28463460	MD15G1299700	76.7	2056	2680	Chr04	-	11605310	11605932	notsure	23.3
i2_LQ_Mix0_5d_c179988/f1p10/2050	1	1463	Chr15	+	22970398	22974478	MD15G1267200	70.3	1464	2079	Chr02	+	12640494	12651145	MD02G1152800	29.6
i2_LQ_Mix0_5d_c94426/f1p3/2327	1	1888	Chr15	-	28029871	28033069	MD15G1297600,MD15G1297500	81.1	1889	2327	Chr10	+	19253822	19254260	notsure	18.9
i2_LQ_Mix0_5d_c67087/f1p2/2898	1	2315	Chr00	+	20350707	20355993	MD00G1096900	79.8	2316	2901	Chr10	+	33637023	33637608	MD10G1240800	20.2
i3_LQ_Mix0_5d_c20218/f1p0/3201	12	1887	Chr05	-	42682400	42686872	MD05G1294300,MD05G1294400	55.2	1888	3397	Chr10	-	36446778	36449542	MD10G1273000	44.5
i2_LQ_Mix0_5d_c135600/f1p31/2641	1	1037	Chr02	+	3162842	3195591	MD02G1039100,MD02G1039000,MD02G1039300,MD02G1039200	39.3	1038	2637	Chr00	+	4472208	4621119	MD00G1027700,MD00G1027900,MD00G1026100,MD00G1028000,MD00G1027600,MD00G1027800,MD00G1027100,MD00G1026500,MD00G1027000,MD00G1028200	60.6
i1_LQ_Mix0_5d_c183816/f1p0/1115	1	881	Chr10	-	17574272	17575175	notsure	79.3	882	1111	Chr10	+	15640346	15640576	notsure	20.7
i2_LQ_Mix0_5d_c117954/f1p6/2543	7	514	Chr00	-	15994200	15995621	notsure	20	515	2538	Chr12	-	25063310	25140867	MD12G1169400,MD12G1170500,MD12G1170200,MD12G1170000,MD12G1169700,MD12G1170400,MD12G1169300,MD12G1169600,MD12G1169200,MD12G1169500,MD12G1170100,MD12G1170300	79.7
i1_LQ_Mix0_5d_c3866/f1p3/1662	1	489	Chr00	+	1416891	1417377	MD00G1011700	29.4	490	1663	Chr15	-	25513831	25566974	MD15G1282500,MD15G1282700,MD15G1282600	70.6
i3_LQ_Mix0_5d_c12669/f1p6/3039	1	1292	Chr17	+	15320267	15321556	MD17G1158300	42.6	1293	3029	Chr00	+	14269715	14271455	notsure	57.2
i2_LQ_Mix0_5d_c5134/f1p2/2250	1	1301	Chr13	-	38739663	38743892	MD13G1277900	57.6	1302	2259	Chr00	-	51397311	51399334	MD00G1214800	42.4
i2_LQ_Mix0_5d_c113992/f1p21/2454	2	2083	Chr15	+	2689629	2693885	MD15G1038500	84.9	2084	2450	Chr08	-	4628115	4629565	MD08G1057600	15
i2_HQ_Mix0_5d_c144340/f10p2/2237	3	1873	Chr04	-	19104425	19108558	MD04G1103800	83.3	1874	2245	Chr12	-	19874393	19874764	notsure	16.6
i2_HQ_Mix0_5d_c173237/f3p5/2090	5	349	Chr01	-	21022477	21023430	MD01G1095100	16.4	350	2093	Chr07	-	23874790	23877131	MD07G1164000	83.1
i2_LQ_Mix0_5d_c30229/f1p0/2338	1	2069	Chr08	-	3806319	3808800	MD08G1048900	87.8	2070	2356	Chr04	-	31233152	31233438	notsure	12.2
i1_LQ_Mix0_5d_c159234/f1p0/1810	2	824	Chr16	+	38918637	38919459	MD16G1283000	45.5	825	1809	Chr00	-	48263621	48264605	MD00G1202200	54.4
i3_LQ_Mix0_5d_c2892/f1p0/3274	2	2323	Chr16	+	38917139	38919453	MD16G1283000	68.2	2324	3406	Chr00	-	48263538	48264611	MD00G1202200	31.8
i4_LQ_Mix0_5d_c7107/f1p0/4185	23	3064	Chr10	+	19501104	19504899	MD10G1117300,MD10G1117200	72.1	3065	4218	Chr15	+	47965032	47966185	notsure	27.4
i1_LQ_Mix0_5d_c181738/f1p0/1042	7	812	Chr02	-	1846953	1865334	MD02G1025000,MD02G1024900	77.2	813	1044	Chr15	-	12811811	12812036	notsure	22.2
i2_LQ_Mix0_5d_c138299/f1p1/2558	1	2286	Chr08	+	27300264	27302565	notsure	89.1	2287	2567	Chr07	-	26831280	26831572	MD07G1187700	10.9
i1_HQ_Mix0_5d_c132872/f2p7/1934	2	1589	Chr03	-	37073810	37076383	MD03G1294700	82	1590	1931	Chr00	+	42092455	42092795	MD00G1179200	17.7
i1_LQ_Mix0_5d_c77517/f5p0/1410	2	421	Chr00	+	20513117	20516074	MD00G1098500	29.9	422	1403	Chr02	-	27428923	27432062	MD02G1229900	69.9
i1_LQ_Mix0_5d_c47135/f1p12/1859	1	955	Chr16	-	6363035	6365862	MD16G1092000	51.3	956	1861	Chr11	-	35200406	35202237	MD11G1241900	48.7
i1_LQ_Mix0_5d_c4206/f1p0/1810	11	1399	Chr00	+	1743977	1748061	MD00G1014000	74	1400	1877	Chr10	-	25506690	25508677	notsure	25.5
i1_LQ_Mix0_5d_c144367/f1p0/1873	2	574	Chr07	-	32216035	32219994	MD07G1254900	30.7	575	1866	Chr07	-	7929893	7931196	MD07G1081600	69.1
i1_LQ_Mix0_5d_c67046/f1p0/1929	6	612	Chr12	+	9108210	9109413	MD12G1075200	31.5	613	1930	Chr12	-	9733047	9735475	MD12G1079800	68.3
i2_HQ_Mix0_5d_c77614/f3p8/2977	8	413	Chr03	+	33836440	33836845	MD03G1250300	13.6	414	2977	Chr11	+	38604139	38611034	MD11G1270400	86.1
i1_HQ_Mix0_5d_c112734/f2p0/1784	2	1027	Chr07	+	25543540	25545367	MD07G1176100	57.4	1028	1787	Chr01	+	22309190	22310442	MD01G1110300	42.5
i2_LQ_Mix0_5d_c61916/f1p5/2709	4	1593	Chr14	+	29699511	29892423	MD14G1212800,MD14G1214100,MD14G1215200,MD14G1214800,MD14G1212200,MD14G1214200,MD14G1215100,MD14G1212600,MD14G1212300,MD14G1214300,MD14G1213000,MD14G1211900,MD14G1213400,MD14G1212000,MD14G1212400,MD14G1213800	58.8	1594	2704	Chr06	-	33594570	33595983	MD06G1202800	41.1
i1_LQ_Mix0_5d_c20401/f1p0/1970	1	1751	Chr17	-	6886208	6893013	MD17G1082500,MD17G1082700,MD17G1082600	88.8	1752	1968	Chr09	-	6788131	6788328	MD09G1092500	11
i2_LQ_Mix0_5d_c30385/f1p1/2368	1	602	Chr16	+	23628953	23629652	notsure	25.3	603	2382	Chr15	+	10981491	10984779	MD15G1148400	74.7
i2_LQ_Mix0_5d_c136025/f1p6/2899	1	2605	Chr00	-	23077588	23085356	MD00G1110400	89.8	2606	2900	Chr04	+	16827132	16827463	notsure	10.2
i2_LQ_Mix0_5d_c37363/f2p10/2970	1	594	Chr12	+	1713745	1714338	MD12G1017800	20.3	595	2930	Chr14	+	1410872	1422656	MD14G1015800	79.7
i1_LQ_Mix0_5d_c64787/f1p0/1734	1	759	Chr15	+	19759319	19763196	MD15G1240100	43.7	760	1736	Chr00	-	8779359	8781326	MD00G1047200	56.3
i2_HQ_Mix0_5d_c16477/f2p25/2910	1	304	Chr07	-	23939979	23940366	notsure	10.5	305	2909	Chr02	+	14043492	14048355	MD02G1164400,MD02G1164500	89.5
i2_LQ_Mix0_5d_c47271/f1p1/2655	3	376	Chr01	-	31006014	31006390	MD01G1217200	14.1	377	2654	Chr07	+	35015201	35018540	MD07G1289400	85.6
i3_HQ_Mix0_5d_c2742/f2p20/3252	1	1972	Chr10	+	39256809	39267152	MD10G1307100,MD10G1307200	60.6	1973	3250	Chr00	+	40665950	40670430	MD00G1175400	39.3
i2_LQ_Mix0_5d_c77243/f1p17/2264	1	534	Chr08	+	12632118	12632650	MD08G1133100	23.6	535	2265	Chr14	+	3717502	3720392	MD14G1039700	76.4
i1_HQ_Mix0_5d_c23417/f2p0/2034	1	1471	Chr06	-	27941704	27945692	MD06G1134900	72.2	1472	2037	Chr10	+	34217972	34218619	MD10G1249600	27.8
i1_LQ_Mix0_5d_c50250/f1p19/1766	1	1246	Chr06	-	27941810	27945696	MD06G1134900	70.4	1247	1769	Chr10	+	34217977	34218660	MD10G1249600	29.6
i1_LQ_Mix0_5d_c3644/f1p0/1955	1	463	Chr13	+	21168143	21170018	MD13G1219100	23.6	464	1962	Chr10	-	6150693	6154535	MD10G1046000	76.4
i3_LQ_Mix0_5d_c26043/f1p0/3070	1	687	Chr07	-	28388633	28389436	notsure	22.3	688	3073	Chr16	-	16112162	16116033	MD16G1186700	77.6
i1_LQ_Mix0_5d_c137866/f1p2/1942	1	1324	Chr00	+	1743988	1748061	MD00G1014000	68.1	1325	1944	Chr10	-	25506690	25508677	notsure	31.9
i2_LQ_Mix0_5d_c167736/f1p5/2437	3	713	Chr05	-	38324055	38324833	MD05G1251500	29.2	714	2439	Chr10	-	32837390	32848400	MD10G1232000	70.8
i1_LQ_Mix0_5d_c22966/f2p0/1412	1	1102	Chr00	+	20513036	20519209	MD00G1098500	77.2	1103	1428	Chr04	+	30569580	30569907	notsure	22.8
i1_LQ_Mix0_5d_c34955/f1p0/1788	1	944	Chr02	-	8064791	8066129	MD02G1100800	52.8	945	1788	Chr02	+	7847918	7848737	MD02G1099000	47.2
i2_LQ_Mix0_5d_c30402/f1p6/2350	4	285	Chr15	+	11576252	11576548	MD15G1155700	12	286	2355	Chr02	+	698974	702493	MD02G1010800	87.9
i4_LQ_Mix0_5d_c8219/f1p0/4228	1	3706	Chr09	-	46727	212528	MD09G1001000,MD09G1000300,MD09G1001100,MD09G1000200,MD09G1001500,MD09G1000900,MD09G1000500,MD09G1001200,MD09G1000400	84.5	3707	4383	Chr12	+	3951309	3952112	MD12G1036800	15.4
i2_LQ_Mix0_5d_c154215/f1p27/2407	1	644	Chr16	+	26682665	26683308	MD16G1245000	26.7	645	2410	Chr06	-	21322850	21327167	MD06G1086400	73.3
i1_LQ_Mix0_5d_c63355/f1p6/1708	4	705	Chr02	+	3289115	3289870	MD02G1040400	41.4	706	1695	Chr00	-	4526904	4543590	MD00G1027200,MD00G1027300	58.4
i1_LQ_Mix0_5d_c29478/f1p0/1620	3	1066	Chr11	+	11979509	12023758	MD11G1132100	65.5	1067	1624	Chr11	+	3077954	3080006	MD11G1034900	34.4
i1_LQ_Mix0_5d_c157581/f1p0/1257	2	960	Chr11	+	32280079	32288448	MD11G1220300	75.7	961	1263	Chr15	-	4779248	4779550	MD15G1069800	23.9
i1_LQ_Mix0_5d_c135135/f1p0/1806	1	1429	Chr15	+	4337983	4340603	MD15G1063000	79	1430	1808	Chr12	-	22607060	22607438	MD12G1147300	21
i2_HQ_Mix0_5d_c1870/f21p8/2978	5	500	Chr09	+	15637460	15637992	MD09G1181600	16.6	501	2979	Chr17	+	16778468	16786038	MD17G1168000	83.2
i2_LQ_Mix0_5d_c67777/f1p0/2462	18	2129	Chr12	+	27471838	27475034	MD12G1192800	85	2130	2484	Chr04	+	26875161	26875516	MD04G1177400	14.3
i1_HQ_Mix0_5d_c18975/f4p1/1495	1	542	Chr15	+	19759319	19761177	MD15G1240100	36.3	543	1495	Chr00	-	8779358	8781299	MD00G1047200	63.7
i1_LQ_Mix0_5d_c157334/f1p0/1722	1	1062	Chr13	-	4071357	4072508	MD13G1058300	61.5	1063	1727	Chr06	+	35022471	35023137	notsure	38.5
i3_LQ_Mix0_5d_c16941/f1p0/4008	1	2668	Chr07	-	21722297	21724979	MD07G1148700	66.6	2669	4008	Chr05	+	21365749	21416548	notsure	33.4
i4_LQ_Mix0_5d_c5838/f1p26/4430	1	3367	Chr12	-	25093396	25096767	notsure	76	3368	4432	Chr01	+	27465849	27467293	MD01G1172600	24
i1_LQ_Mix0_5d_c63545/f1p10/1978	1	778	Chr14	-	23434637	23436198	MD14G1141900	39.3	779	1980	Chr17	-	29753892	29755097	MD17G1248700	60.7
i1_LQ_Mix0_5d_c158103/f1p7/1499	1	1206	Chr15	+	35354081	35356635	MD15G1327100	80.5	1207	1495	Chr15	-	50000512	50000803	notsure	19.3
i1_LQ_Mix0_5d_c50144/f1p0/1500	1	397	Chr12	+	23166045	23166685	MD12G1151800	26.3	398	1509	Chr03	-	644875	648866	MD03G1008200	73.7
i1_LQ_Mix0_5d_c16482/f1p58/2005	1	376	Chr00	-	50127816	50129134	MD00G1205700	17.5	377	2144	Chr08	-	12294830	12301701	MD08G1130500	82.5
i2_LQ_Mix0_5d_c61276/f1p4/2784	4	954	Chr10	-	1630251	1643263	MD10G1012100	34.2	955	2777	Chr11	+	3078690	3080735	MD11G1034900	65.6
i4_LQ_Mix0_5d_c3742/f1p0/4343	6	2278	Chr11	-	15491844	15534558	MD11G1159100,MD11G1159200	48.1	2279	4729	Chr03	-	13791165	13795037	MD03G1137000	51.8
i4_LQ_Mix0_5d_c3247/f1p14/4173	26	3337	Chr03	+	27710839	27803981	MD03G1203300,MD03G1203100,MD03G1203000	79.2	3338	4181	Chr04	-	2644383	2645538	MD04G1022600	20.2
i2_LQ_Mix0_5d_c33753/f1p2/2853	1	522	Chr04	+	19506301	19507183	MD04G1110400	18.3	523	2855	Chr10	+	20604122	20606454	notsure	81.7
i1_LQ_Mix0_5d_c60706/f1p15/1771	10	1377	Chr12	-	26822822	26824829	notsure	77.1	1378	1769	Chr01	+	7923143	7923533	notsure	22.1
i2_LQ_Mix0_5d_c133552/f1p2/2792	1	1588	Chr09	+	18099632	18103321	MD09G1198500	56.9	1589	2793	Chr02	+	36287879	36289083	notsure	43.1
i2_LQ_Mix0_5d_c7880/f1p8/2838	1	1535	Chr11	-	35365253	35367084	MD11G1243500	53.9	1536	2849	Chr11	+	33223333	33244555	MD11G1228500,MD11G1228400,MD11G1228700	46.1
i3_LQ_Mix0_5d_c19951/f1p17/3194	7	2153	Chr01	-	9004195	9007936	MD01G1022700	69.4	2154	3089	Chr15	+	36319957	36320987	MD15G1329800	30.3
i2_HQ_Mix0_5d_c16160/f2p11/2121	1	377	Chr00	-	50127816	50129134	MD00G1205700	17.8	378	2122	Chr08	-	12294928	12301701	MD08G1130500	82.2
i2_LQ_Mix0_5d_c122401/f1p51/2093	6	1869	Chr05	-	36357315	36359402	MD05G1230100,MD05G1230000	88.7	1870	2101	Chr08	+	9225583	9315107	MD08G1106500,MD08G1106300	11
i3_LQ_Mix0_5d_c6563/f1p0/3486	3	1458	Chr14	-	28264501	28267438	MD14G1191600	41.8	1459	3486	Chr05	+	4306570	4314758	MD05G1027200	58.2
i2_LQ_Mix0_5d_c137268/f1p2/2655	4	2358	Chr16	-	4781408	4853810	MD16G1068100,MD16G1068200,MD16G1068300	87.9	2359	2679	Chr00	-	16230121	16230441	MD00G1081400	12
i1_HQ_Mix0_5d_c19314/f3p1/1574	1	1375	Chr15	+	5906492	5908973	MD15G1085500	87.4	1376	1574	Chr14	-	31570895	31571093	notsure	12.6
i3_LQ_Mix0_5d_c8104/f1p11/3101	1	1741	Chr05	-	42682357	42686886	MD05G1294300,MD05G1294400	54.4	1742	3202	Chr10	-	36446782	36449499	MD10G1273000	45.6
i1_HQ_Mix0_5d_c17995/f3p26/1938	1	536	Chr07	+	24220080	24220615	notsure	27.6	537	1925	Chr01	+	21372425	21377299	MD01G1100600	71.6
i1_LQ_Mix0_5d_c3519/f1p0/2042	2	1758	Chr15	+	2311525	2314803	MD15G1033000	86	1759	2042	Chr09	+	1813231	1813640	MD09G1029300	13.9
i2_LQ_Mix0_5d_c9670/f1p15/2107	1	1901	Chr10	-	19947386	19949847	MD10G1122400	89.9	1902	2115	Chr15	+	4591877	4592092	notsure	10.1
i2_HQ_Mix0_5d_c129674/f3p2/2657	1	563	Chr17	+	25991224	25991941	notsure	21.2	564	2643	Chr17	-	14584700	14598278	MD17G1154300	78.3
i2_LQ_Mix0_5d_c41293/f1p21/2031	1	480	Chr02	+	30200667	30201355	MD02G1250400	23.6	481	2034	Chr02	+	30073305	30075003	MD02G1249800	76.4
i1_LQ_Mix0_5d_c30497/f1p0/1915	15	298	Chr06	-	22946371	22946649	MD06G1095700	14.8	299	1915	Chr14	-	18815823	18818603	MD14G1115700	84.4
i3_HQ_Mix0_5d_c6167/f3p0/3543	1	843	Chr08	-	8289872	8292529	MD08G1098300	23.8	844	3543	Chr02	-	14093694	14096464	notsure	76.2
i2_LQ_Mix0_5d_c173313/f1p56/2694	1	306	Chr00	-	10021802	10022170	MD00G1053600	11.4	307	2694	Chr17	-	14584644	14739528	MD17G1154300,MD17G1154500,MD17G1154400	88.6
i1_LQ_Mix0_5d_c35546/f1p23/1712	1	400	Chr05	+	34165137	34165537	MD05G1210200	23.4	401	1712	Chr00	-	767278	768590	notsure	76.6
i1_LQ_Mix0_5d_c22119/f1p0/1273	1	897	Chr00	-	27550055	27551833	MD00G1129300	70.4	898	1267	Chr07	+	12612913	12613822	MD07G1109700	29
i2_LQ_Mix0_5d_c61251/f1p94/3174	1	1443	Chr13	+	21168143	21170873	MD13G1219100	45.5	1444	3173	Chr10	-	6150692	6154766	MD10G1046000	54.5
i2_LQ_Mix0_5d_c98460/f1p7/2799	1	578	Chr03	+	37044280	37045608	MD03G1294100	20.7	579	2792	Chr00	-	42103485	42107260	MD00G1179500	79.3
i1_HQ_Mix0_5d_c21375/f3p3/1564	1	1382	Chr11	-	7953814	7972374	MD11G1095700,MD11G1095500,MD11G1095400,MD11G1095900	88.3	1383	1555	Chr03	-	7083151	7083324	MD03G1086800	11
i1_LQ_Mix0_5d_c101324/f1p6/1817	1	410	Chr06	+	28915163	28916776	MD06G1146600	22.6	411	1817	Chr02	+	36414387	36436482	MD02G1308900,MD02G1309100	77.4
i2_HQ_Mix0_5d_c144985/f4p9/2136	1	457	Chr00	-	50127816	50129214	MD00G1205700	21.4	458	2137	Chr08	-	12294930	12301701	MD08G1130500	78.6
i2_HQ_Mix0_5d_c44845/f2p4/2685	11	1400	Chr10	+	39257842	39267152	MD10G1307100,MD10G1307200	51.8	1401	2678	Chr00	+	40665950	40670430	MD00G1175400	47.6
i2_HQ_Mix0_5d_c32207/f7p3/2871	7	869	Chr09	-	10444564	10798763	MD09G1137300,MD09G1136000,MD09G1136300,MD09G1139000,MD09G1138300,MD09G1137000,MD09G1137400,MD09G1138200,MD09G1136200,MD09G1138600,MD09G1137500,MD09G1139200,MD09G1137200,MD09G1136100,MD09G1138500	30.1	870	2871	Chr17	-	11308001	11312786	MD17G1128700	69.7
i1_HQ_Mix0_5d_c36161/f3p0/1689	1	191	Chr02	-	30587634	30587824	notsure	11.3	192	1690	Chr15	+	53873409	53875019	MD15G1438900	88.7
i2_LQ_Mix0_5d_c18778/f1p2/3061	3	1396	Chr05	+	45769524	45772044	MD05G1334600	44.8	1397	3109	Chr05	-	33893484	33895195	MD05G1207800	55.1
i3_LQ_Mix0_5d_c28955/f1p0/3076	1	2283	Chr17	-	28864359	28868688	MD17G1239400	74.1	2284	3079	Chr09	-	31568268	31569206	MD09G1246500	25.9
i2_LQ_Mix0_5d_c8989/f2p4/2983	1	1996	Chr02	+	1588528	1593385	MD02G1022800	66.8	1997	2988	Chr11	+	15699055	15700048	MD11G1160100	33.2
i2_LQ_Mix0_5d_c149918/f1p22/1778	1	336	Chr03	-	32859996	32860983	MD03G1244100	18.7	337	1792	Chr04	-	3039052	3041717	MD04G1026100	81.2
i1_LQ_Mix0_5d_c50296/f1p3/1829	2	1006	Chr07	+	27781123	27783247	MD07G1199400	54.9	1007	1832	Chr01	+	24438058	24439537	MD01G1134700	45.1
i1_HQ_Mix0_5d_c61128/f3p0/1522	1	1325	Chr00	+	43428212	43433118	MD00G1184200	87.1	1326	1521	Chr11	-	38128179	38128470	notsure	12.9
i1_LQ_Mix0_5d_c149329/f1p0/1914	1	854	Chr16	+	38918605	38919459	MD16G1283000	44.6	855	1916	Chr00	-	48263538	48264605	MD00G1202200	55.4
i5_LQ_Mix0_5d_c2129/f1p6/5993	29	1302	Chr09	+	4853853	4855920	notsure	20.1	1303	6345	Chr08	+	5314163	5378801	MD08G1066500,MD08G1067200,MD08G1066800,MD08G1067100,MD08G1066900,MD08G1067400,MD08G1067000,MD08G1067300	79.5
i3_HQ_Mix0_5d_c26695/f3p0/3062	8	413	Chr03	+	33836440	33836845	MD03G1250300	13.3	414	3064	Chr11	+	38604139	38611126	MD11G1270400	86.5
i2_LQ_Mix0_5d_c51339/f1p26/2637	1	2343	Chr07	+	32604730	32609058	MD07G1259900	88.8	2344	2638	Chr01	+	28622167	28622464	MD01G1187800	11.2
i3_LQ_Mix0_5d_c8587/f1p1/3888	5	972	Chr05	+	22039404	22041259	MD05G1107100	24.7	973	3916	Chr04	-	3828305	3832305	MD04G1034200	75.2
i2_LQ_Mix0_5d_c35135/f1p48/2428	1	1448	Chr10	-	1715869	1718956	MD10G1012500	59.6	1449	2429	Chr02	+	27835503	27836484	notsure	40.4
i5_LQ_Mix0_5d_c306/f2p0/5661	1	5103	Chr13	+	16284794	16291116	MD13G1190800	89.7	5104	5689	Chr16	-	16738521	16739084	MD16G1191200	10.3
i2_LQ_Mix0_5d_c66678/f1p39/2735	1	276	Chr09	+	28300020	28300296	MD09G1229200	10.1	277	2737	Chr16	+	6939479	6951319	MD16G1100100	89.9
i1_LQ_Mix0_5d_c99106/f1p0/1695	3	906	Chr07	+	27781157	27783180	MD07G1199400	52.8	907	1711	Chr01	+	24438080	24439511	MD01G1134700	47
i2_LQ_Mix0_5d_c41813/f1p1/2041	1	306	Chr17	+	25991221	25991571	notsure	15	307	2041	Chr17	-	14584681	14597910	MD17G1154300	85
i5_LQ_Mix0_5d_c790/f1p0/5727	6	724	Chr00	+	52552276	52552998	notsure	12.5	725	5765	Chr07	-	4364935	5143361	MD07G1055700,MD07G1050800,MD07G1052000,MD07G1055600,MD07G1050900,MD07G1052100,MD07G1053600,MD07G1054500,MD07G1053400,MD07G1051400,MD07G1055100,MD07G1055000,MD07G1054800,MD07G1053300,MD07G1055800,MD07G1052500,MD07G1051600,MD07G1054000,MD07G1055300,MD07G1054100,MD07G1051100,MD07G1055200,MD07G1051000,MD07G1055500,MD07G1051200,MD07G1055400	87.4
i1_LQ_Mix0_5d_c11549/f1p6/1424	1	1238	Chr13	+	4714263	4717042	MD13G1068700	86.8	1239	1427	Chr00	-	51058619	51058807	notsure	13.2
i2_LQ_Mix0_5d_c78380/f1p25/2503	1	1362	Chr10	+	22420328	22422687	MD10G1139400	54.3	1363	2507	Chr00	+	28684057	28685205	notsure	45.7
i3_LQ_Mix0_5d_c28566/f1p0/3465	1	509	Chr03	+	33836336	33836845	MD03G1250300	14.7	510	3465	Chr11	+	38604139	38611094	MD11G1270400	85.3
i2_HQ_Mix0_5d_c33733/f8p7/2341	1	297	Chr02	-	12236960	12237267	MD02G1148800	12.7	298	2337	Chr15	-	22480343	22482382	MD15G1263000	87.2
i3_HQ_Mix0_5d_c6201/f2p12/3300	1	1229	Chr14	-	28264501	28267475	MD14G1191600	37.2	1230	3303	Chr05	+	4306570	4314805	MD05G1027200	62.8
i1_LQ_Mix0_5d_c176460/f1p0/1896	1	825	Chr16	+	38918635	38919459	MD16G1283000	43.6	826	1893	Chr00	-	48263538	48264605	MD00G1202200	56.4
i3_LQ_Mix0_5d_c31599/f1p0/3640	1	2245	Chr06	+	34628090	34630332	MD06G1213500	61.5	2246	3649	Chr14	-	17090573	17092075	notsure	38.5
i3_LQ_Mix0_5d_c20169/f1p0/3743	1	1760	Chr09	+	18100956	18103899	MD09G1198500	43.4	1761	4057	Chr17	+	32282561	32287672	MD17G1262000,MD17G1261900	56.6
i3_LQ_Mix0_5d_c16911/f1p6/3247	1	593	Chr03	+	37044271	37045608	MD03G1294100	18.1	594	3276	Chr00	-	42103086	42107260	MD00G1179500	81.9
i3_LQ_Mix0_5d_c23392/f1p0/3432	4	1268	Chr14	+	3716673	3717908	MD14G1039700	36.9	1269	3426	Chr09	-	22032971	22041817	MD09G1218300	62.9
i2_LQ_Mix0_5d_c66404/f1p1/2368	1	384	Chr12	-	7855993	7856376	MD12G1066600	15.5	385	2466	Chr14	-	7262070	7266048	MD14G1066800,MD14G1066700	84.2
i2_LQ_Mix0_5d_c11402/f1p40/2131	1	1516	Chr10	-	5162174	5224624	MD10G1039200,MD10G1039600,MD10G1039500,MD10G1039900,MD10G1040000,MD10G1039800	70.8	1517	2120	Chr07	+	34442578	34443325	MD07G1280600	28.2
i3_LQ_Mix0_5d_c8441/f1p0/3240	1	1184	Chr14	-	28264501	28267508	MD14G1191600	36.5	1185	3243	Chr05	+	4306570	4314791	MD05G1027200	63.5
i1_LQ_Mix0_5d_c139729/f1p0/1651	1	473	Chr04	-	27303243	27305528	MD04G1182100	28.6	474	1652	Chr11	+	11848950	11853219	MD11G1131000	71.4
i5_LQ_Mix0_5d_c2281/f1p0/5088	40	799	Chr15	-	17107175	17107943	notsure	14.9	800	5087	Chr05	+	27440285	27448215	MD05G1143400	84.3
i3_LQ_Mix0_5d_c11056/f1p0/3136	1	1834	Chr04	-	531262	535512	MD04G1003800	56.6	1835	3241	Chr15	-	8027960	8029753	MD15G1113800,MD15G1113900	43.4
i1_HQ_Mix0_5d_c17834/f3p4/1955	2	1099	Chr06	-	19994828	19996408	MD06G1081700	56.1	1100	1957	Chr14	-	15980956	15983030	notsure	43.8
i1_LQ_Mix0_5d_c18742/f1p0/1536	1	746	Chr07	-	22416728	22417531	MD07G1154600,MD07G1154500	48.5	747	1537	Chr01	+	19209511	19211940	notsure	51.5
i2_LQ_Mix0_5d_c8192/f1p10/2968	1	1245	Chr06	-	30841784	30850996	MD06G1168300	41.8	1246	2979	Chr05	+	28055004	28859719	MD05G1153000,MD05G1151100,MD05G1160000,MD05G1150600,MD05G1149900,MD05G1153100,MD05G1157400,MD05G1155800,MD05G1154900,MD05G1151300,MD05G1150800,MD05G1152500,MD05G1154800,MD05G1159600,MD05G1153600,MD05G1153700,MD05G1157200,MD05G1156100,MD05G1153400,MD05G1150400,MD05G1155600,MD05G1156000,MD05G1153500,MD05G1155100,MD05G1157800,MD05G1157700,MD05G1158000,MD05G1156900,MD05G1155300,MD05G1152700,MD05G1156…	58.2
i2_LQ_Mix0_5d_c95643/f1p2/2765	1	2474	Chr02	-	26216061	26231555	MD02G1223800,MD02G1223900	88.8	2475	2786	Chr13	-	10640558	10641073	MD13G1138300	11.2
i1_LQ_Mix0_5d_c114297/f1p1/1682	2	1502	Chr02	+	7550728	7555097	MD02G1095700	88.8	1503	1691	Chr10	+	34611097	34611284	notsure	11.2
i2_HQ_Mix0_5d_c137053/f2p0/3109	1	829	Chr07	-	28388633	28389566	notsure	26.5	830	3124	Chr16	-	16112175	16116033	MD16G1186700	73.5
i1_LQ_Mix0_5d_c136690/f1p136/1823	13	1052	Chr04	-	25675704	25676743	notsure	58.4	1053	1781	Chr06	-	30425557	30426285	MD06G1163300	40.9
i2_LQ_Mix0_5d_c52640/f1p7/3013	9	1850	Chr01	-	25633641	25638296	MD01G1147200	61.1	1851	3014	Chr15	+	3162536	3163962	MD15G1046000	38.6
i2_LQ_Mix0_5d_c155828/f1p11/3047	25	510	Chr12	+	31870832	31871860	notsure	16	511	3031	Chr04	+	31068312	31071382	MD04G1230900	83.1
i3_LQ_Mix0_5d_c17870/f1p1/3615	1	759	Chr11	+	36040131	36040876	notsure	19.7	760	3858	Chr09	-	36718403	36721485	notsure	80.3
i2_LQ_Mix0_5d_c67504/f1p2/2286	1	452	Chr16	-	626067	626841	MD16G1008300	19.7	453	2293	Chr15	-	7356072	7360202	MD15G1105000,MD15G1104800	80.3
i2_LQ_Mix0_5d_c95790/f1p5/2895	1	979	Chr03	-	24844380	24967877	MD03G1182200,MD03G1183100,MD03G1181800,MD03G1183000,MD03G1182900,MD03G1181200,MD03G1182400,MD03G1182100,MD03G1181100	32.8	980	2984	Chr11	-	28834915	28837826	MD11G1199700,MD11G1199800	67.2
i1_LQ_Mix0_5d_c138502/f1p1/1280	1	596	Chr11	+	560215	561204	MD11G1005900	46.2	597	1287	Chr05	+	46451317	46452534	MD05G1344600	53.6
i1_LQ_Mix0_5d_c51711/f1p5/1894	1	825	Chr16	+	38918635	38919459	MD16G1283000	43.6	826	1893	Chr00	-	48263538	48264605	MD00G1202200	56.4
i2_LQ_Mix0_5d_c11341/f1p5/3094	1	515	Chr03	-	24844297	24846323	MD03G1181100,MD03G1181200	16.5	516	3115	Chr11	-	28834796	28838302	MD11G1199700,MD11G1199800	83.5
i1_HQ_Mix0_5d_c95438/f2p26/1703	1	1092	Chr13	+	10503644	10505996	MD13G1136800	64.1	1093	1689	Chr16	+	10073364	10074341	MD16G1132100	35
i1_LQ_Mix0_5d_c36830/f1p13/1914	2	1489	Chr07	-	1325022	1326510	MD07G1014700	77.6	1490	1914	Chr05	-	34430475	34430899	notsure	22.2
i1_LQ_Mix0_5d_c6254/f1p0/1543	1	536	Chr09	-	8562992	8563527	MD09G1112600	33.9	537	1567	Chr08	-	26601323	26603292	MD08G1205500	65.3
i1_LQ_Mix0_5d_c156695/f1p0/1370	1	1178	Chr05	+	46581272	46601050	MD05G1346500,MD05G1346700,MD05G1346800	86	1179	1370	Chr14	+	9727772	9727963	MD14G1082800	14
i2_HQ_Mix0_5d_c144948/f48p27/2295	4	350	Chr13	+	12502326	12502680	MD13G1158900	15.1	351	2294	Chr16	+	12849060	12852787	MD16G1159100	84.7
i2_LQ_Mix0_5d_c180300/f1p30/3010	2	2241	Chr17	-	28864359	28868645	MD17G1239400	74.2	2242	3017	Chr09	-	31568288	31569206	MD09G1246500	25.7
i1_LQ_Mix0_5d_c44885/f1p0/1924	1	608	Chr11	-	20316849	20321454	MD11G1174000	31.6	609	1926	Chr16	+	10088882	10090200	MD16G1132300	68.4
i2_LQ_Mix0_5d_c11715/f1p6/2986	14	589	Chr11	+	15060263	15061646	MD11G1156400	19.3	590	2987	Chr03	+	13390863	13404044	MD03G1134100,MD03G1134200	80.3
i3_LQ_Mix0_5d_c8848/f1p0/3168	1	1820	Chr16	-	23053772	23060274	MD16G1227200	54.8	1821	3324	Chr11	-	27887078	27896799	MD11G1194500	45.2
i1_LQ_Mix0_5d_c60594/f2p0/1736	1	1228	Chr07	-	32216006	32219991	MD07G1254900	70.2	1229	1749	Chr02	+	13252000	13252515	notsure	29.8
i2_LQ_Mix0_5d_c79004/f1p5/2279	6	306	Chr12	+	3873329	3874453	MD12G1035600	13.2	307	2281	Chr14	+	2040476	2043431	MD14G1022400	86.6
i2_LQ_Mix0_5d_c97574/f1p11/2479	1	1266	Chr15	+	38385346	38386612	MD15G1339600	51.5	1267	2453	Chr14	+	5607887	5609073	MD14G1055100	48.3
i1_LQ_Mix0_5d_c133453/f1p1/1341	1	760	Chr17	+	2902203	2905817	MD17G1039600	56.9	761	1334	Chr10	-	17475686	17476411	notsure	43
i2_HQ_Mix0_5d_c28224/f33p0/2649	1	310	Chr00	-	10021802	10022172	MD00G1053600	11.7	311	2638	Chr17	-	14584700	14739528	MD17G1154300,MD17G1154500,MD17G1154400	87.9
i1_LQ_Mix0_5d_c86844/f1p0/1194	1	407	Chr16	+	38918635	38919043	MD16G1283000	34	408	1192	Chr08	-	5037109	5044898	MD08G1063900,MD08G1064000	65.6
i3_LQ_Mix0_5d_c21675/f1p5/3306	1	810	Chr09	+	18073280	18103321	MD09G1198300,MD09G1198500	24.5	811	3306	Chr17	+	32282671	32287679	MD17G1262000,MD17G1261900	75.5
i1_HQ_Mix0_5d_c78733/f4p0/1892	1	1622	Chr16	-	26763385	26789859	MD16G1245400,MD16G1245300	85.7	1623	1893	Chr09	+	16236842	16237112	notsure	14.3
i2_LQ_Mix0_5d_c101883/f1p2/2293	1	596	Chr03	-	13241487	13242387	notsure	26	597	2295	Chr06	+	21861956	21863651	MD06G1090100	74
i1_LQ_Mix0_5d_c99113/f1p0/1508	4	1017	Chr17	+	27599775	27602559	MD17G1228400	67	1018	1514	Chr10	+	10633137	10633741	MD10G1075100	32.8
i2_LQ_Mix0_5d_c16825/f1p5/2367	1	1837	Chr10	-	16243591	16245384	MD10G1100300	74.2	1838	2476	Chr10	-	15584608	15585292	notsure	25.8
i2_LQ_Mix0_5d_c117161/f1p5/2153	1	1841	Chr12	-	16027180	16030644	MD12G1102500	85.4	1842	2157	Chr06	-	948721	949034	MD06G1008700	14.6
i1_LQ_Mix0_5d_c113925/f1p0/1400	1	1162	Chr16	-	14362237	14369622	MD16G1171100,MD16G1171200	82.6	1163	1407	Chr01	+	14786349	14786593	notsure	17.4
i2_LQ_Mix0_5d_c66922/f1p76/2885	3	2555	Chr10	-	30097521	30101025	MD10G1203300	88.3	2556	2871	Chr05	-	35354989	35355533	MD05G1221000	10.9
i1_LQ_Mix0_5d_c47738/f1p0/1245	1	748	Chr06	+	34628056	34628803	MD06G1213500	59.7	749	1252	Chr16	-	8757402	8758076	notsure	40.3
i3_LQ_Mix0_5d_c32798/f1p3/3915	19	3087	Chr02	-	36388892	36396227	MD02G1308700	77.9	3088	3941	Chr10	-	4402691	4404779	MD10G1034200	21.7
i2_LQ_Mix0_5d_c30990/f1p5/2557	2	600	Chr13	+	33864689	33865287	notsure	23.3	601	2566	Chr03	-	31744033	31746004	MD03G1232500,MD03G1232400	76.6
i2_LQ_Mix0_5d_c48605/f1p72/2758	1	829	Chr15	-	22443315	22444271	MD15G1262500	30	830	2757	Chr12	-	27652266	27656356	MD12G1195300	69.9
i2_LQ_Mix0_5d_c101967/f1p66/2504	1	1709	Chr16	-	991797	993509	notsure	68.2	1710	2500	Chr08	+	7757963	7760586	MD08G1093200,MD08G1093100	31.6
i2_LQ_Mix0_5d_c172119/f4p33/2638	1	350	Chr17	+	25991223	25991732	notsure	13.2	351	2637	Chr17	-	14584700	14735651	MD17G1154300,MD17G1154500,MD17G1154400	86.4
i2_LQ_Mix0_5d_c87255/f1p13/2036	7	433	Chr02	-	5894651	5896049	MD02G1072800	21	434	2033	Chr16	+	2211618	2214259	MD16G1031000	78.6
i4_LQ_Mix0_5d_c8293/f1p0/4196	41	3228	Chr12	-	31661389	31666099	notsure	72.2	3229	4414	Chr11	+	3126648	3128150	MD11G1035700	26.9
i3_LQ_Mix0_5d_c22972/f1p1/3946	1	3366	Chr16	+	28044231	28048178	MD16G1250300,MD16G1250500,MD16G1250400,MD16G1250600	84.9	3367	3964	Chr10	+	29432928	29433527	notsure	15.1
i2_LQ_Mix0_5d_c68436/f1p9/2359	1	1484	Chr10	+	12046193	12074166	MD10G1081900	62.7	1485	2367	Chr00	-	51684980	52161432	MD00G1216800,MD00G1216300,MD00G1215900,MD00G1219400,MD00G1216200,MD00G1219500,MD00G1218000,MD00G1218200,MD00G1219600,MD00G1217800,MD00G1220100,MD00G1216900,MD00G1218100,MD00G1218900,MD00G1217900,MD00G1217000,MD00G1220300,MD00G1217100,MD00G1219000,MD00G1216500,MD00G1219800,MD00G1216400,MD00G1219900,MD00G1215400,MD00G1219700,MD00G1220400,MD00G1217400,MD00G1220800,MD00G1218800,MD00G1218700,MD00G1217…	37.3
i1_LQ_Mix0_5d_c6996/f1p0/1894	1	801	Chr16	+	38918635	38919435	MD16G1283000	42.3	802	1893	Chr00	-	48263538	48296237	MD00G1202200	57.7
i1_LQ_Mix0_5d_c136643/f1p0/1548	1	1329	Chr00	+	20513040	20519209	MD00G1098500	85.7	1330	1550	Chr04	+	30569580	30569800	notsure	14.3
i2_LQ_Mix0_5d_c32137/f1p44/2911	2	534	Chr10	+	12995697	12996475	MD10G1087700	18.3	535	2909	Chr16	-	1001030	1005213	MD16G1013100	81.6
i2_LQ_Mix0_5d_c4877/f1p10/2757	22	1993	Chr01	-	9004195	9007828	MD01G1022700	71.5	1994	2758	Chr15	+	36319957	36320832	MD15G1329800	27.7
i5_LQ_Mix0_5d_c2374/f1p6/5048	1	4302	Chr10	+	37822093	37830190	MD10G1289100	84.3	4303	5102	Chr05	+	44099672	44100468	MD05G1310200	15.7
i2_LQ_Mix0_5d_c138010/f1p8/2988	1	1844	Chr08	+	25985726	26003845	MD08G1200500,MD08G1200600	61.7	1845	2991	Chr13	-	3281600	3282746	notsure	38.3
i1_HQ_Mix0_5d_c85941/f2p0/1177	2	600	Chr13	+	33864689	33865287	notsure	50.7	601	1181	Chr03	-	31745427	31746005	MD03G1232500	49.2
i1_HQ_Mix0_5d_c66699/f3p3/1653	1	398	Chr04	-	27303243	27305566	MD04G1182100	24.2	399	1644	Chr11	+	11848950	11853286	MD11G1131000	75.8
i0_LQ_Mix0_5d_c3432/f1p0/924	1	136	Chr10	-	2033919	2034380	notsure	14.7	137	927	Chr03	-	3164466	3166164	MD03G1040000	85.3
i3_LQ_Mix0_5d_c21683/f1p0/3699	1	2984	Chr14	+	30222227	30226523	MD14G1220000	80.5	2985	3691	Chr08	+	11537073	11537992	notsure	19.1
i2_LQ_Mix0_5d_c151014/f1p1/2619	1	2011	Chr00	+	51214577	51219865	MD00G1214400,MD00G1214500	76.7	2012	2623	Chr07	+	2888418	2889030	MD07G1035200	23.3
i1_LQ_Mix0_5d_c21904/f1p5/1583	1	632	Chr03	+	2474663	2476478	MD03G1030600	39.5	633	1598	Chr05	+	44839474	44842285	MD05G1321100	60.5
i0_HQ_Mix0_5d_c2038/f2p0/913	1	820	Chr17	-	11617235	11618052	notsure	89.4	821	917	Chr04	-	30057966	30058069	MD04G1218000	10.6
i1_LQ_Mix0_5d_c157552/f1p0/1771	4	1386	Chr05	-	7317285	7318671	MD05G1043100,MD05G1043000	77.8	1387	1777	Chr09	-	6448617	6449007	notsure	22
i2_LQ_Mix0_5d_c133662/f1p8/2984	1	501	Chr10	+	6379415	6379921	MD10G1047800	16.8	502	2976	Chr05	+	6972596	6975219	MD05G1041400	83
i1_LQ_Mix0_5d_c6563/f1p0/1742	1	1262	Chr06	-	27941810	27945696	MD06G1134900	72.3	1263	1746	Chr10	+	34217977	34218621	MD10G1249600	27.7
i3_HQ_Mix0_5d_c36582/f4p0/3210	1	1444	Chr13	+	21168143	21170873	MD13G1219100	45	1445	3211	Chr10	-	6150655	6154766	MD10G1046000	55
i1_LQ_Mix0_5d_c19072/f1p0/1883	19	699	Chr03	-	3597369	3604177	MD03G1045100	36.1	700	1889	Chr12	+	196593	198531	MD12G1000900	63
i1_LQ_Mix0_5d_c84325/f4p0/1955	1	891	Chr16	+	38918569	38919459	MD16G1283000	45.5	892	1957	Chr00	-	48263539	48264605	MD00G1202200	54.5
i2_LQ_Mix0_5d_c6657/f1p47/2429	1	1897	Chr15	-	50668282	50670752	MD15G1406000	78.1	1898	2430	Chr08	-	28069279	28069811	MD08G1218200	21.9
i2_LQ_Mix0_5d_c116256/f1p3/2187	1	237	Chr03	+	4210803	4211033	notsure	10.8	238	2189	Chr17	-	4308119	4315860	notsure	89.2
i2_LQ_Mix0_5d_c17266/f1p21/2503	11	698	Chr16	-	21356538	21357226	notsure	27.4	699	2511	Chr14	+	28077116	28080211	MD14G1189200	72.2
i3_LQ_Mix0_5d_c35448/f1p0/3091	1	527	Chr16	-	38918809	38919337	notsure	17	528	3101	Chr15	-	26701709	26707737	MD15G1288700,MD15G1288800	83
i1_LQ_Mix0_5d_c181632/f1p0/1041	1	123	Chr16	+	16021683	16021803	MD16G1185700	11.7	124	1054	Chr13	+	15741571	15745678	MD13G1185100	88.3
i3_LQ_Mix0_5d_c31950/f1p14/3816	1	2142	Chr03	-	3856786	3858924	notsure	56	2143	3824	Chr11	+	8445582	9508819	MD11G1104900,MD11G1105000,MD11G1102700,MD11G1104800,MD11G1105100,MD11G1101400,MD11G1103600,MD11G1102800,MD11G1102100,MD11G1104000,MD11G1101500,MD11G1104300,MD11G1105800,MD11G1103000,MD11G1107300,MD11G1100900,MD11G1106000,MD11G1103100,MD11G1104500,MD11G1105700,MD11G1102500,MD11G1101200,MD11G1101300,MD11G1101000,MD11G1105600,MD11G1101100,MD11G1101800,MD11G1107500,MD11G1103300,MD11G1107600,MD11G1103…	44
i1_LQ_Mix0_5d_c98441/f1p8/1489	1	569	Chr16	+	17203851	17204401	MD16G1193900	36.7	570	1551	Chr13	+	16719240	16724132	MD13G1193000	63.3
i3_LQ_Mix0_5d_c36442/f2p0/3069	1	443	Chr07	-	23939975	23940501	notsure	14.4	444	3073	Chr02	+	14043472	14048360	MD02G1164400,MD02G1164500	85.6
i4_LQ_Mix0_5d_c11639/f1p5/4916	1	4194	Chr17	-	1268448	1272657	notsure	85.2	4195	4920	Chr12	+	1957809	1981808	MD12G1019900	14.8
i2_HQ_Mix0_5d_c16468/f6p6/2117	1	1323	Chr09	-	25513819	25515143	notsure	62.5	1324	2117	Chr01	+	5559924	5560704	notsure	37.5
i2_HQ_Mix0_5d_c32261/f3p10/2204	1	380	Chr00	-	50127816	50129137	MD00G1205700	17.2	381	2204	Chr08	-	12294846	12301701	MD08G1130500	82.8
i1_LQ_Mix0_5d_c101160/f1p62/1721	1	1231	Chr15	+	2311525	2314968	MD15G1033000	70.5	1232	1746	Chr09	+	36675841	36676355	notsure	29.5
i2_LQ_Mix0_5d_c51159/f1p15/2295	2	1711	Chr15	+	14199552	14202095	MD15G1180600	74.5	1712	2295	Chr12	-	3353741	3354324	notsure	25.4
i2_LQ_Mix0_5d_c136181/f1p4/2349	1	498	Chr14	+	14508429	14508926	notsure	21.3	499	2338	Chr12	-	3069148	3073713	MD12G1027300	78.7
i3_LQ_Mix0_5d_c12367/f1p8/3078	1	728	Chr04	-	2225574	2226300	MD04G1019300	23.6	729	3084	Chr09	+	33001611	33003965	notsure	76.4
i2_LQ_Mix0_5d_c19996/f1p3/2230	18	431	Chr17	-	355838	356252	MD17G1004200	18.3	432	2265	Chr09	-	181215	183045	MD09G1001100	81
i1_LQ_Mix0_5d_c62957/f1p4/1714	1	1493	Chr03	-	9517859	9521601	MD03G1109400	86.4	1494	1728	Chr10	-	13932569	13932803	notsure	13.6
i1_LQ_Mix0_5d_c47014/f1p16/1827	4	1636	Chr01	+	29987453	30019331	MD01G1204400,MD01G1204500	87.2	1637	1872	Chr04	+	3207856	3208094	notsure	12.6
i2_LQ_Mix0_5d_c100767/f1p2/2705	1	2409	Chr03	-	37073810	37078531	MD03G1294700	88.8	2410	2712	Chr00	+	42092455	42092753	MD00G1179200	11.2
i4_LQ_Mix0_5d_c4046/f1p0/4315	1	1380	Chr07	+	26113778	26115163	notsure	32	1381	4317	Chr15	-	54098693	54108844	MD15G1441300	68
i2_HQ_Mix0_5d_c41898/f27p3/2812	5	434	Chr07	-	32097061	32097442	MD07G1253700	15.3	435	2813	Chr01	-	28128038	28132019	MD01G1182800	84.6
i3_LQ_Mix0_5d_c3793/f1p0/3541	1	1582	Chr14	-	28264501	28267536	MD14G1191600	44.6	1583	3543	Chr05	+	4306570	4314590	MD05G1027200	55.3
i2_LQ_Mix0_5d_c105189/f1p12/2138	1	398	Chr14	-	14080857	14081231	MD14G1094300	18.6	399	2138	Chr12	+	15223680	15225410	MD12G1096800	81.4
i2_LQ_Mix0_5d_c79883/f1p15/2398	1	2109	Chr15	+	12456660	12461059	MD15G1165600	88.7	2110	2373	Chr02	+	1604075	1604311	MD02G1022900	11.1
i1_HQ_Mix0_5d_c86381/f2p0/1954	1	230	Chr15	+	53906006	53906214	notsure	11.7	231	1941	Chr03	-	33792290	33797015	MD03G1249900	87.4
i1_LQ_Mix0_5d_c19837/f1p7/1817	1	640	Chr05	-	31345891	31347774	MD05G1184900	35	641	1830	Chr05	+	32961098	32962290	notsure	65
i1_LQ_Mix0_5d_c35381/f1p0/1857	1	532	Chr10	+	39893983	39895452	MD10G1314900	28.8	533	1848	Chr05	+	46186200	46187517	MD05G1341400	71.2
i1_LQ_Mix0_5d_c149041/f12p0/1830	12	1045	Chr07	-	22416728	22418240	MD07G1154600,MD07G1154500	56.5	1046	1830	Chr01	+	19209511	19211934	notsure	42.9
i2_LQ_Mix0_5d_c11962/f1p18/2418	1	440	Chr15	-	1346092	1346529	notsure	18.1	441	2429	Chr05	+	28429634	28433393	MD05G1153400	81.9
i1_LQ_Mix0_5d_c30538/f1p0/1895	1	1060	Chr05	+	36413388	36414446	MD05G1230600	54.2	1061	1957	Chr13	+	17731822	17735298	MD13G1199600	45.8
i1_LQ_Mix0_5d_c13405/f1p7/1049	1	149	Chr16	+	38916756	38916904	MD16G1283000	14.2	150	1053	Chr08	-	14927127	14928029	MD08G1148300	85.8
i2_LQ_Mix0_5d_c155358/f1p9/2146	1	1900	Chr15	+	2311498	2314968	MD15G1033000	88.5	1901	2146	Chr14	+	25327471	25327716	MD14G1159200	11.5
i3_LQ_Mix0_5d_c9902/f1p6/3526	9	1467	Chr14	-	28264501	28267442	MD14G1191600	41.2	1468	3538	Chr05	+	4306570	4314702	MD05G1027200	58.5
i2_LQ_Mix0_5d_c150700/f1p12/2890	23	1484	Chr11	+	35857079	35860545	notsure	50.5	1485	2893	Chr03	-	31262252	31265601	MD03G1227200	48.7
i4_LQ_Mix0_5d_c2637/f1p0/4260	1	2068	Chr05	+	36205560	36207619	notsure	48.4	2069	4271	Chr00	-	21512065	21514858	MD00G1101700	51.6
i2_LQ_Mix0_5d_c3018/f1p23/2384	1	1978	Chr11	-	1790835	1792813	notsure	82.8	1979	2389	Chr10	-	35984712	35985776	MD10G1266800	17.2
i3_LQ_Mix0_5d_c18940/f1p0/3344	1	373	Chr10	+	31931436	31931811	notsure	10.8	374	3457	Chr14	+	23562477	23582915	MD14G1142900,MD14G1143100	89.2
i1_LQ_Mix0_5d_c51755/f2p0/1980	1	813	Chr13	-	20176888	20178614	MD13G1214000	41	814	1981	Chr16	-	21526413	21527582	notsure	59
i2_HQ_Mix0_5d_c61148/f6p3/2812	22	502	Chr07	-	32097061	32097475	MD07G1253700	17.1	503	2807	Chr01	-	28128112	28132019	MD01G1182800	82.1
i2_LQ_Mix0_5d_c106792/f1p3/2076	1	427	Chr15	-	7248593	7249019	MD15G1102400	20.5	428	2075	Chr08	-	11412057	11413707	MD08G1123400	79
i1_LQ_Mix0_5d_c35429/f1p0/1214	1	723	Chr16	+	11407986	11411043	MD16G1146100	61.1	724	1182	Chr12	+	23478406	23479233	notsure	38.8
i0_LQ_Mix0_5d_c4334/f1p0/488	1	85	Chr12	-	30703127	30703211	notsure	17.5	86	483	Chr15	-	45426003	45426400	notsure	82.1
i2_LQ_Mix0_5d_c106865/f1p6/2162	1	1249	Chr09	+	18098003	18103321	MD09G1198500	57.8	1250	2161	Chr17	+	32282671	32285721	MD17G1262000,MD17G1261900	42.2
i3_LQ_Mix0_5d_c10020/f1p0/3606	31	1429	Chr09	-	29444145	29450775	notsure	39.4	1430	3553	Chr02	+	14447493	14451309	MD02G1168300	59.8
i3_LQ_Mix0_5d_c38516/f1p0/3036	1	1405	Chr14	+	519452	520858	MD14G1004700	46.1	1406	3046	Chr15	+	19821853	19823700	MD15G1240700	53.9
i2_LQ_Mix0_5d_c24752/f1p4/2148	1	940	Chr07	-	2599458	2600394	MD07G1032000	43.7	941	2150	Chr02	+	34943196	34944520	MD02G1294400,MD02G1294500	56.3
i1_LQ_Mix0_5d_c114216/f1p19/1460	2	978	Chr12	+	7645567	7650385	MD12G1065300	66.7	979	1464	Chr13	+	11285911	11287134	MD13G1145100	33.2
i1_LQ_Mix0_5d_c117873/f1p0/1270	4	472	Chr07	+	27782343	27783180	MD07G1199400	36.8	473	1273	Chr01	+	24438080	24439533	MD01G1134700	62.9
i2_LQ_Mix0_5d_c114654/f1p104/2933	4	2588	Chr11	-	219582	223884	MD11G1002400	88.2	2589	2930	Chr03	-	174364	174715	MD03G1002500	11.7
i1_LQ_Mix0_5d_c136479/f1p0/1309	1	277	Chr15	+	29168271	29202303	MD15G1302200	21	278	1316	Chr05	-	42679061	42680116	MD05G1294300	79
i1_LQ_Mix0_5d_c178717/f1p0/1156	1	937	Chr10	-	17574272	17575228	notsure	80.4	938	1165	Chr10	+	15640346	15640575	notsure	19.6
i1_HQ_Mix0_5d_c171136/f2p0/1928	1	1592	Chr02	+	30200944	30202657	MD02G1250400	82.4	1593	1930	Chr02	+	29991083	29991420	MD02G1249400	17.5
i2_LQ_Mix0_5d_c64841/f1p2/2223	5	257	Chr04	+	25110359	25110615	notsure	11.1	258	2286	Chr00	-	21511614	21514391	MD00G1101700	88.8
i1_LQ_Mix0_5d_c105762/f1p0/1883	2	821	Chr16	+	38918637	38919459	MD16G1283000	43.5	822	1885	Chr00	-	48263540	48264605	MD00G1202200	56.4
i2_LQ_Mix0_5d_c142429/f1p20/2044	1	1647	Chr09	-	11049290	11050939	MD09G1141200	80.5	1648	2046	Chr08	-	2351371	2351769	notsure	19.5
i2_LQ_Mix0_5d_c131170/f1p15/1721	2	939	Chr07	+	27781123	27783180	MD07G1199400	54.6	940	1717	Chr01	+	24438080	24439510	MD01G1134700	45.3
i1_LQ_Mix0_5d_c158803/f1p0/1194	1	195	Chr08	+	21137402	21137692	MD08G1174000	16.3	196	1197	Chr15	+	43407193	43410382	MD15G1360400	83.7
i3_LQ_Mix0_5d_c13271/f1p3/3109	1	919	Chr15	+	54272078	54273465	MD15G1442300	29.5	920	3107	Chr08	+	31124888	31131768	MD08G1247600	70.3
i0_LQ_Mix0_5d_c8157/f1p0/1101	1	586	Chr09	+	10241197	10242689	MD09G1133500	53.1	587	1104	Chr02	+	13252000	13252512	notsure	46.9
i1_LQ_Mix0_5d_c7760/f1p0/1747	1	423	Chr05	-	45880162	45880583	notsure	24.2	424	1749	Chr16	-	16112162	16114322	MD16G1186700	75.7
i3_LQ_Mix0_5d_c22331/f1p19/3317	1	2763	Chr07	+	6771258	6776663	MD07G1071600	83.2	2764	3319	Chr06	+	19415861	19416416	notsure	16.8
i1_LQ_Mix0_5d_c66079/f1p36/1825	1	1599	Chr16	-	26763385	26789847	MD16G1245400,MD16G1245300	87.4	1600	1829	Chr09	+	16236842	16237071	notsure	12.6
i0_LQ_Mix0_5d_c3768/f1p13/900	1	516	Chr11	+	8496463	8497912	MD11G1101500	57.1	517	903	Chr04	+	27174802	27175284	MD04G1181000	42.9
i4_LQ_Mix0_5d_c12788/f1p0/4055	1	2988	Chr15	-	7540295	7604514	MD15G1108200,MD15G1108600,MD15G1108500,MD15G1108000,MD15G1108900,MD15G1109000,MD15G1108400	74	2989	4036	Chr10	-	28799828	28801009	MD10G1191200	26
i2_LQ_Mix0_5d_c80043/f1p2/2752	1	2403	Chr12	-	19849765	19852168	notsure	87.1	2404	2760	Chr14	+	29473122	29473478	notsure	12.9
i2_LQ_Mix0_5d_c24254/f1p1061/2474	2	1986	Chr16	-	38917350	38919334	notsure	80.2	1987	2474	Chr11	+	35883894	35885075	MD11G1246800	19.7
i2_LQ_Mix0_5d_c78765/f1p6/2619	1	986	Chr05	-	38323506	38324774	MD05G1251500	37.6	987	2625	Chr10	-	32836968	32839101	MD10G1232000	62.4
i1_LQ_Mix0_5d_c116223/f1p0/2045	1	539	Chr16	+	23629025	23629652	notsure	26	540	2069	Chr15	+	10981491	10984732	MD15G1148400	73.9
i1_LQ_Mix0_5d_c63572/f1p2/1374	1	328	Chr10	-	2519410	2519736	notsure	23.6	329	1387	Chr09	+	244059	246007	MD09G1001900	76.4
i1_LQ_Mix0_5d_c47946/f1p0/1959	1	516	Chr15	+	1577361	1584485	MD15G1026800,MD15G1026700	26.2	517	1966	Chr05	-	45864137	45866301	MD05G1336800	73.8
i2_LQ_Mix0_5d_c72434/f1p0/2039	1	1645	Chr07	+	261989	264015	MD07G1002400	80.5	1646	2044	Chr02	-	37324473	37355817	MD02G1318900,MD02G1318800,MD02G1319100	19.5
i2_LQ_Mix0_5d_c30404/f1p1/2371	1	291	Chr04	+	21466202	21466493	notsure	12.1	292	2407	Chr17	-	8562296	8568546	MD17G1101100	87.9
i1_LQ_Mix0_5d_c139123/f1p0/2009	2	1021	Chr08	+	1571583	1589882	MD08G1021800	48.2	1022	2117	Chr08	+	26669684	26670802	notsure	51.8
i3_LQ_Mix0_5d_c23381/f1p4/3704	1	2178	Chr13	-	38738823	38744845	MD13G1277900	58.8	2179	3704	Chr00	-	51397144	51399734	MD00G1214800	41.2
i1_HQ_Mix0_5d_c48942/f2p0/1651	1	1109	Chr01	+	11418099	11419207	notsure	67.1	1110	1652	Chr12	-	25269641	25270183	notsure	32.9
i1_LQ_Mix0_5d_c60306/f1p0/1912	1	907	Chr07	+	2254269	2255174	MD07G1026900	46.5	908	1952	Chr02	-	35239574	35240827	MD02G1297100	53.5
i1_LQ_Mix0_5d_c182823/f1p0/1016	1	720	Chr16	+	19844782	19845514	MD16G1209800	71.4	721	1008	Chr06	+	7210532	7210813	notsure	28.6
i2_LQ_Mix0_5d_c120054/f1p2/2164	1	1852	Chr07	+	1565645	1570848	MD07G1018200	85.8	1853	2159	Chr00	+	3141660	3141967	notsure	14.2
i1_LQ_Mix0_5d_c101988/f1p0/1977	1	1191	Chr05	-	41438841	41441913	MD05G1280400	58.5	1192	2037	Chr03	-	13964174	13965620	MD03G1137800	41.5
i4_LQ_Mix0_5d_c3243/f1p1/4675	46	909	Chr00	+	24470148	24493784	MD00G1114900,MD00G1115000	18	910	4799	Chr15	-	8027962	8033313	MD15G1113800,MD15G1113900	81.1
i1_LQ_Mix0_5d_c23850/f2p4/1379	1	1180	Chr16	-	12079089	12080618	MD16G1152800	85.2	1181	1385	Chr05	-	17970152	17970358	notsure	14.8
i2_LQ_Mix0_5d_c179462/f1p2/2013	1	584	Chr16	-	626067	626971	MD16G1008300	29	585	2014	Chr15	-	7356660	7360202	MD15G1105000,MD15G1104800	71
i2_LQ_Mix0_5d_c152299/f1p1/2421	3	544	Chr16	+	23629013	23629652	notsure	22.3	545	2426	Chr15	+	10981491	10984780	MD15G1148400	77.6
i2_LQ_Mix0_5d_c99349/f1p11/2764	1	815	Chr10	-	38912400	38913214	MD10G1302200	29.4	816	2768	Chr09	-	487147	490936	MD09G1006700	70.6
i1_HQ_Mix0_5d_c153529/f5p0/1656	1	1420	Chr10	-	17574272	17575721	notsure	86.1	1421	1650	Chr10	+	15640346	15640576	notsure	13.9
i3_LQ_Mix0_5d_c3617/f1p0/3089	1	819	Chr07	+	34984916	34986094	MD07G1288900	26.5	820	3090	Chr01	+	31157199	31159559	MD01G1219200	73.5
i2_LQ_Mix0_5d_c39851/f1p3/2086	1	1797	Chr04	-	418483	420849	MD04G1002900	86.1	1798	2087	Chr13	+	43133547	43148799	MD13G1285000	13.9
i3_LQ_Mix0_5d_c22237/f1p2/3225	1	2827	Chr10	-	40607246	40611857	MD10G1325700	87.6	2828	3213	Chr05	-	46832300	46832758	MD05G1351300	12
i4_LQ_Mix0_5d_c7224/f1p0/4300	3	1168	Chr13	+	22860608	22861774	notsure	26.8	1169	4343	Chr08	-	24823386	24829064	MD08G1192800	73.1
i1_LQ_Mix0_5d_c155355/f1p0/1634	1	865	Chr08	-	6924360	6925181	notsure	52.9	866	1634	Chr02	-	30345777	30396541	notsure	47.1
i3_LQ_Mix0_5d_c31578/f1p0/3573	1	2574	Chr09	+	18098003	18103321	MD09G1198500	68.1	2575	3777	Chr02	+	36287879	36289083	notsure	31.9
i3_LQ_Mix0_5d_c4277/f1p0/3315	1	2161	Chr16	+	38917139	38919396	MD16G1283000	65.7	2162	3289	Chr17	-	20007962	20009057	MD17G1176600	34.3
i2_LQ_Mix0_5d_c41114/f1p11/2127	3	1797	Chr15	+	2311519	2314803	MD15G1033000	83.9	1798	2139	Chr05	+	16928403	16929549	notsure	16
i2_LQ_Mix0_5d_c149272/f1p101/2650	1	494	Chr16	-	38918844	38919337	notsure	18.6	495	2652	Chr11	+	42117872	42122108	MD11G1307000	81.4
i1_LQ_Mix0_5d_c53532/f1p0/1131	2	979	Chr03	+	36633488	36634725	MD03G1287200	86.5	980	1131	Chr09	+	34266868	34267019	notsure	13.4
i6_LQ_Mix0_5d_c596/f1p0/6113	1	5147	Chr16	-	21077124	21082279	MD16G1216000	84.2	5148	6116	Chr13	+	26544387	26554492	MD13G1250400	15.8
i2_HQ_Mix0_5d_c14494/f40p41/2723	1	327	Chr00	-	37676577	37677489	notsure	12	328	2723	Chr11	-	13286955	13291697	MD11G1142500	88
i2_LQ_Mix0_5d_c136331/f1p2/2899	8	693	Chr16	-	626067	627074	MD16G1008300	23.6	694	2900	Chr15	-	7350836	7360202	MD15G1105000,MD15G1104800	76
i2_LQ_Mix0_5d_c40636/f1p1/2171	1	1837	Chr08	+	9825861	9828429	MD08G1111600	84.6	1838	2166	Chr09	-	15300547	15300875	notsure	15.1
i2_LQ_Mix0_5d_c13225/f1p10/2113	1	677	Chr05	+	36261023	36261686	notsure	32.1	678	2107	Chr00	+	16037254	16045348	MD00G1080100	67.8
i3_LQ_Mix0_5d_c11487/f1p1/3208	1	1440	Chr13	+	21168143	21170873	MD13G1219100	45.2	1441	3188	Chr10	-	6150644	6154766	MD10G1046000	54.8
i2_LQ_Mix0_5d_c16767/f1p4/2279	5	1704	Chr05	+	40754711	40756357	notsure	79.1	1705	2148	Chr04	+	31424396	31427294	MD04G1235100	20.7
i2_LQ_Mix0_5d_c142986/f1p1/2052	10	746	Chr12	+	9108265	9109413	MD12G1075200	35.7	747	2067	Chr12	-	9733044	9735475	MD12G1079800	63.9
i1_HQ_Mix0_5d_c80538/f4p6/1525	1	172	Chr06	+	31073412	31073583	notsure	11.2	173	1531	Chr11	+	5893332	5894707	MD11G1068400	88.8
i2_LQ_Mix0_5d_c41116/f1p10/2098	1	1587	Chr10	-	35272973	35277247	MD10G1258700	75.6	1588	2098	Chr03	-	13964174	13964662	MD03G1137800	24.4
i2_HQ_Mix0_5d_c50786/f2p14/2633	1	2359	Chr14	+	19591424	19595573	MD14G1121300	89.7	2360	2629	Chr06	+	23901581	23901852	notsure	10.3
i2_LQ_Mix0_5d_c83416/f1p41/2628	3	354	Chr02	-	32032636	32034214	MD02G1266200	13.4	355	2627	Chr07	+	4969686	4971963	MD07G1053800	86.5
i3_LQ_Mix0_5d_c7893/f1p2/3673	31	1492	Chr05	+	7632880	7635649	notsure	37.2	1493	3934	Chr12	+	28699141	28702905	MD12G1206600	62.1
i1_LQ_Mix0_5d_c170759/f1p0/1889	1	699	Chr16	+	38918635	38919335	MD16G1283000	37	700	1889	Chr00	-	48263538	48356893	MD00G1202700,MD00G1202600,MD00G1202400,MD00G1202300,MD00G1202200	63
i3_LQ_Mix0_5d_c6652/f1p3/3851	1	518	Chr07	-	15488794	15493987	notsure	12.7	519	4075	Chr15	-	18888055	18891647	notsure	87.2
i1_LQ_Mix0_5d_c20477/f1p0/1884	1	1588	Chr14	+	10723315	10732163	MD14G1086800	83.9	1589	1892	Chr11	-	32010282	32010585	notsure	16.1
i2_LQ_Mix0_5d_c26841/f1p8/2288	1	2024	Chr16	-	32164197	32169694	MD16G1260700	88.9	2025	2277	Chr00	+	34906860	34907111	MD00G1158000	11.1
i2_LQ_Mix0_5d_c9261/f1p2/2813	1	1676	Chr15	+	1851552	1854055	MD15G1030100	59.4	1677	2817	Chr15	-	5806061	5808843	MD15G1084000	40.5
i1_HQ_Mix0_5d_c40320/f3p0/1324	1	1126	Chr09	+	22427401	22431394	MD09G1219200	84.8	1127	1317	Chr17	+	24510511	24510712	MD17G1202600	14.4
i1_LQ_Mix0_5d_c170068/f1p9/1169	1	511	Chr15	+	19759319	19761177	MD15G1240100	43.4	512	1177	Chr00	-	8779648	8781299	MD00G1047200	56.6
i2_LQ_Mix0_5d_c117245/f1p7/2397	1	1786	Chr15	+	2311520	2314803	MD15G1033000	74.2	1787	2408	Chr08	+	25430440	25431372	notsure	25.8
i1_LQ_Mix0_5d_c125571/f1p0/1157	1	129	Chr03	-	3380362	3380490	MD03G1043100	11.1	130	1157	Chr11	-	4007785	4009837	MD11G1046100	88.9
i1_LQ_Mix0_5d_c136519/f1p11/1433	1	630	Chr03	+	2474664	2476478	MD03G1030600	41.3	631	1521	Chr16	-	11415694	11417473	MD16G1146300	58.4
i1_HQ_Mix0_5d_c5814/f2p1/2014	1	1177	Chr16	-	1276616	1277790	notsure	58.5	1178	2012	Chr02	-	20932573	20933570	notsure	41.5
i1_LQ_Mix0_5d_c48426/f2p0/2019	2	929	Chr09	+	6625888	6628456	MD09G1090600	45.5	930	2036	Chr17	+	6608338	6610282	MD17G1079800	54.3
i2_LQ_Mix0_5d_c83324/f1p4/2155	1	939	Chr03	+	37079617	37149419	MD03G1295400,MD03G1295300,MD03G1294800,MD03G1295600,MD03G1295100,MD03G1295500	43.5	940	2159	Chr00	-	42083891	42085492	MD00G1179000	56.5
i2_LQ_Mix0_5d_c96033/f1p64/2668	1	2221	Chr02	-	32030824	32034262	MD02G1266200	83.1	2222	2674	Chr07	+	4971513	4971967	MD07G1053800	16.9
i1_LQ_Mix0_5d_c123588/f1p0/1890	1	823	Chr16	+	38918635	38919459	MD16G1283000	43.5	824	1890	Chr00	-	48263538	48264605	MD00G1202200	56.5
i2_LQ_Mix0_5d_c66560/f1p2/2300	1	565	Chr03	-	13241487	13242347	notsure	24.6	566	2298	Chr06	+	21861956	21863686	MD06G1090100	75.4
i2_LQ_Mix0_5d_c17850/f1p88/2347	1	273	Chr10	+	35590870	35591124	notsure	11.6	274	2355	Chr12	+	25279693	25336122	MD12G1173200,MD12G1172400,MD12G1172500,MD12G1172900	88.4
i2_HQ_Mix0_5d_c148025/f5p27/2223	4	350	Chr13	+	12502326	12502680	MD13G1158900	15.6	351	2223	Chr16	+	12849060	12852717	MD16G1159100	84.3
i3_LQ_Mix0_5d_c7069/f1p0/3635	1	3210	Chr11	-	38790239	38995324	MD11G1273300,MD11G1272500,MD11G1273000,MD11G1273100,MD11G1272700,MD11G1272900,MD11G1273200	88.1	3211	3643	Chr11	-	22409166	22409599	MD11G1181900	11.9
i2_LQ_Mix0_5d_c49244/f1p2/2908	5	416	Chr11	-	7971939	7972349	MD11G1095900	14.1	417	2914	Chr03	-	7083259	7085755	MD03G1086800	85.7
i2_LQ_Mix0_5d_c94847/f1p13/2632	18	660	Chr05	+	36261054	36261686	notsure	24.5	661	2620	Chr00	+	16037254	16046457	MD00G1080100	74.8
i1_HQ_Mix0_5d_c44278/f3p0/1769	1	825	Chr08	-	26669687	26671081	MD08G1206200	46.7	826	1768	Chr16	-	14077578	14078520	notsure	53.3
i3_LQ_Mix0_5d_c7810/f1p0/3261	1	2139	Chr10	+	39256749	39267152	MD10G1307100,MD10G1307200	65.3	2140	3276	Chr00	+	40665950	40670420	MD00G1175400	34.7
i2_LQ_Mix0_5d_c33398/f1p11/2584	1	1170	Chr07	+	13709332	13711681	MD07G1114300	44.9	1171	2607	Chr02	-	22190330	22193246	MD02G1211000	55.1
i1_LQ_Mix0_5d_c34467/f1p0/1219	9	553	Chr11	+	5248660	5249206	notsure	44.3	554	1229	Chr15	-	18316669	18317344	MD15G1225500	55
i2_LQ_Mix0_5d_c22056/f1p1/2071	1	1895	Chr02	-	6352272	6354629	MD02G1080500	89.9	1896	2109	Chr10	-	23681196	23682125	MD10G1149500	10.1
i2_LQ_Mix0_5d_c3752/f1p32/2621	3	2311	Chr11	-	40928913	40931809	MD11G1289800	87.7	2312	2634	Chr03	-	35359634	35359959	MD03G1269000	12.3
i1_HQ_Mix0_5d_c43327/f2p0/1433	1	1242	Chr05	+	46581297	46601050	MD05G1346500,MD05G1346700,MD05G1346800	86.7	1243	1433	Chr14	+	9727772	9727962	MD14G1082800	13.3
i1_LQ_Mix0_5d_c35871/f1p0/1400	1	1208	Chr12	+	29881456	29884651	notsure	86.5	1209	1396	Chr13	+	17838505	17838698	notsure	13.5
i2_LQ_Mix0_5d_c82080/f1p51/2187	1	1749	Chr10	-	5183725	5225248	MD10G1039800,MD10G1039900,MD10G1040000,MD10G1039500,MD10G1039600	79.8	1750	2169	Chr07	+	34442657	34443325	MD07G1280600	19.2
i3_LQ_Mix0_5d_c17428/f1p0/3077	5	410	Chr03	+	33836440	33836845	MD03G1250300	13.2	411	3074	Chr11	+	38604139	38611117	MD11G1270400	86.5
i2_LQ_Mix0_5d_c62831/f1p7/2888	1	1887	Chr06	-	17577099	17578986	notsure	65.4	1888	2886	Chr14	-	11475241	11476234	MD14G1090200	34.6
i1_LQ_Mix0_5d_c4910/f1p10/1969	1	1469	Chr15	+	27576005	27578847	MD15G1294800	75	1470	1959	Chr16	-	36263766	36264258	notsure	25
i2_LQ_Mix0_5d_c17225/f1p1/2261	1	2074	Chr03	-	37073810	37077464	MD03G1294700	88.1	2075	2351	Chr00	+	42092455	42092727	MD00G1179200	11.8
i1_LQ_Mix0_5d_c111661/f1p7/2010	1	942	Chr16	+	38918518	38919459	MD16G1283000	46.9	943	2009	Chr00	-	48263539	48264605	MD00G1202200	53.1
i2_LQ_Mix0_5d_c37021/f1p11/3039	24	395	Chr05	+	5126675	5127018	notsure	12.2	396	3047	Chr16	+	1210754	1213405	MD16G1015600	87
i2_HQ_Mix0_5d_c99622/f2p37/2569	1	2298	Chr02	-	33718822	33722654	MD02G1281300	89.5	2299	2569	Chr01	+	23592633	23592903	MD01G1122800	10.5
i2_LQ_Mix0_5d_c150520/f1p8/2458	4	2200	Chr13	-	6602167	6838022	MD13G1094400,MD13G1096500,MD13G1093700,MD13G1094700,MD13G1094300,MD13G1096400,MD13G1096000,MD13G1094600,MD13G1095000,MD13G1094200,MD13G1095700,MD13G1093800,MD13G1096200,MD13G1094100,MD13G1095400,MD13G1096600,MD13G1093900,MD13G1094000	89.3	2201	2460	Chr16	-	6808780	6809039	MD16G1097600	10.6
i1_LQ_Mix0_5d_c24080/f1p14/1289	1	218	Chr16	+	41092893	41093105	notsure	16.9	219	1288	Chr04	+	12181034	12182103	notsure	83.1
i3_LQ_Mix0_5d_c4171/f1p0/3543	1	2545	Chr09	-	11804263	11808033	MD09G1149900	71.1	2546	3578	Chr11	+	24490434	24491495	notsure	28.9
i1_LQ_Mix0_5d_c133527/f1p4/1695	1	1303	Chr00	+	8729607	8733126	MD00G1046500,MD00G1046600	76.8	1304	1690	Chr10	-	2685024	2685400	notsure	22.8
i1_LQ_Mix0_5d_c30137/f1p46/1202	1	1044	Chr11	+	9910896	9911941	notsure	86.5	1045	1207	Chr11	-	36567755	36567915	notsure	13.5
i4_LQ_Mix0_5d_c3507/f1p0/5047	1	621	Chr13	-	12651852	12684841	MD13G1161300	12.3	622	5068	Chr13	+	20389355	20393800	notsure	87.7
i3_LQ_Mix0_5d_c6050/f1p0/3405	1	934	Chr05	-	29076217	29078982	MD05G1162100	26.8	935	3481	Chr10	+	27269364	27274813	MD10G1178900	73.2
i2_LQ_Mix0_5d_c97293/f1p833/2940	1	2108	Chr16	-	38917228	38919337	notsure	71.7	2109	2940	Chr16	+	18893005	18893834	MD16G1204900	28.3
i1_LQ_Mix0_5d_c118867/f1p21/1694	1	1246	Chr06	-	27941810	27945682	MD06G1134900	73.6	1247	1692	Chr10	+	34218018	34218620	MD10G1249600	26.4
i1_LQ_Mix0_5d_c54478/f1p14/1184	1	344	Chr15	+	28461382	28462575	MD15G1299700	29	345	1185	Chr13	+	13263191	13264061	notsure	71
i2_LQ_Mix0_5d_c94997/f1p8/2322	1	1796	Chr00	-	15976501	15995569	MD00G1079300,MD00G1079200,MD00G1079500,MD00G1079400	77.6	1797	2313	Chr12	-	25063315	25064422	MD12G1169200	22.3
i3_LQ_Mix0_5d_c31389/f1p0/3520	1	1751	Chr13	+	21168150	21170873	MD13G1219100	49.7	1752	3520	Chr10	-	6150648	6154766	MD10G1046000	50.2
i1_LQ_Mix0_5d_c115508/f1p20/1664	2	317	Chr08	+	30292377	30292690	MD08G1235300	18.9	318	1667	Chr15	+	52715488	52721247	MD15G1426600	80.9
i2_LQ_Mix0_5d_c106303/f1p8/2039	1	1799	Chr15	-	29287546	29290631	MD15G1302600	88.1	1800	2038	Chr02	-	17840361	17840597	notsure	11.7
i2_LQ_Mix0_5d_c52329/f3p14/2254	6	734	Chr05	+	36260972	36261686	notsure	32.3	735	2259	Chr00	+	16037254	16045694	MD00G1080100	67.5
i2_LQ_Mix0_5d_c22030/f1p12/2991	1	1943	Chr16	-	23962546	23971307	MD16G1233000,MD16G1232900	64.8	1944	2993	Chr14	-	2702765	3170547	MD14G1032300,MD14G1035300,MD14G1032900,MD14G1035200,MD14G1034500,MD14G1034400,MD14G1034600,MD14G1032800,MD14G1035000,MD14G1033300,MD14G1034700,MD14G1033200,MD14G1034300,MD14G1031900,MD14G1034800,MD14G1034900,MD14G1033400,MD14G1033800,MD14G1031100,MD14G1032600,MD14G1032700,MD14G1034200,MD14G1035500,MD14G1032500,MD14G1034100,MD14G1032200,MD14G1031400,MD14G1033100,MD14G1031200,MD14G1033000	35
i2_LQ_Mix0_5d_c131422/f1p12/2767	1	1533	Chr09	+	18100212	18103321	MD09G1198500	55.4	1534	2768	Chr02	+	36287849	36289083	notsure	44.6
i3_HQ_Mix0_5d_c2023/f5p0/3761	1	2279	Chr06	+	34628059	34630336	MD06G1213500	60.6	2280	3762	Chr02	-	35599457	35602998	notsure	39.4
i1_HQ_Mix0_5d_c51124/f3p0/1682	1	1427	Chr12	-	31187522	31210953	MD12G1239000,MD12G1239100,MD12G1239200,MD12G1239300,MD12G1239400	84.8	1428	1682	Chr12	-	21027829	21028083	notsure	15.2
i2_HQ_Mix0_5d_c173590/f5p7/2092	1	342	Chr06	+	36529269	36530606	MD06G1234200	16.3	343	2092	Chr14	+	31972350	31976493	MD14G1240900	83.7
i2_LQ_Mix0_5d_c162434/f1p0/2049	1	431	Chr10	+	15880491	15881029	notsure	19.9	432	2159	Chr10	+	23545237	23547423	notsure	79.9
i2_HQ_Mix0_5d_c95891/f2p2/2266	1	421	Chr05	-	32204023	32204583	MD05G1194400	18.6	422	2269	Chr10	-	27423175	27426814	MD10G1181100	81.4
i2_LQ_Mix0_5d_c48773/f1p7/2803	6	2303	Chr05	+	22039404	22041861	MD05G1107100	82	2304	2799	Chr04	-	3606349	3607534	notsure	17.7
i4_LQ_Mix0_5d_c2793/f1p0/4872	1	2432	Chr15	+	17043008	17045440	notsure	49.6	2433	4902	Chr10	-	37214836	37220467	notsure	50.4
i1_LQ_Mix0_5d_c117009/f1p5/1563	1	376	Chr15	+	14871343	14871717	MD15G1188400	24	377	1565	Chr02	-	5153021	5154176	notsure	76
i3_HQ_Mix0_5d_c23868/f2p0/3689	1	381	Chr09	-	9613504	9613990	notsure	10.3	382	3692	Chr02	-	3292019	3299831	MD02G1040700,MD02G1040600	89.7
i2_HQ_Mix0_5d_c94042/f2p10/2285	1	286	Chr10	+	5393312	5393585	MD10G1041500	12.5	287	2276	Chr05	+	6012325	6015887	MD05G1037700	87.3
i3_LQ_Mix0_5d_c8825/f1p0/3135	1	668	Chr05	-	45866632	45867299	MD05G1336800	21.6	669	3087	Chr15	+	1577166	1585931	MD15G1026800,MD15G1026700	78.4
i1_LQ_Mix0_5d_c70952/f1p0/1174	2	944	Chr09	+	5226084	5293431	MD09G1075300,MD09G1075000,MD09G1075100,MD09G1075400	77.2	945	1222	Chr09	-	9186464	9186741	MD09G1119100	22.7
i1_LQ_Mix0_5d_c16863/f1p0/1532	1	1228	Chr15	+	2311519	2314803	MD15G1033000	80.7	1229	1520	Chr14	+	9533649	9533939	notsure	19.2
i2_LQ_Mix0_5d_c123077/f1p12/2201	2	679	Chr02	+	228093	228758	MD02G1002900	30.8	680	2198	Chr15	+	10871423	10875233	MD15G1146100	69.1
i1_LQ_Mix0_5d_c13077/f1p0/1178	1	958	Chr11	-	19210770	19212646	MD11G1172900	81.4	959	1177	Chr05	-	43160477	43160695	MD05G1298000	18.6
i1_LQ_Mix0_5d_c50084/f1p0/1778	1	1568	Chr11	-	1662020	1670066	notsure	88.6	1569	1770	Chr15	-	21230085	21230286	notsure	11.4
i2_LQ_Mix0_5d_c154875/f1p5/2993	1	1459	Chr05	+	9119757	9122674	MD05G1053800,MD05G1053600,MD05G1053700	48.5	1460	3011	Chr07	-	6926113	6927844	notsure	51.5
i4_LQ_Mix0_5d_c11412/f1p37/4769	1	777	Chr03	-	36530375	36531161	MD03G1285700	16.2	778	4783	Chr11	-	41981100	41985144	MD11G1305100	83.8
i1_LQ_Mix0_5d_c33087/f1p0/1982	1	1830	Chr17	+	32282783	32287177	MD17G1262000,MD17G1261900	84.7	1831	2160	Chr09	-	3090989	3091318	MD09G1047100	15.3
i1_LQ_Mix0_5d_c6655/f1p0/2037	1	378	Chr13	+	31949842	31953752	notsure	18.4	379	2050	Chr08	-	16443949	16445714	MD08G1152800	81.6
i2_LQ_Mix0_5d_c93964/f2p4/2136	1	599	Chr05	+	9121515	9122674	MD05G1053800,MD05G1053700	27.9	600	2144	Chr07	-	6926121	6927844	notsure	72
i1_LQ_Mix0_5d_c78316/f1p0/1625	3	1234	Chr15	-	23404433	23409675	MD15G1270100	75.6	1235	1629	Chr02	-	12956623	12957017	notsure	24.2
i2_LQ_Mix0_5d_c117263/f1p85/2326	1	2071	Chr16	+	38914305	38916376	MD16G1283000	89.1	2072	2325	Chr00	-	48604941	48605194	MD00G1203000	10.9
i3_LQ_Mix0_5d_c18895/f1p31/3805	1	2355	Chr04	-	27303243	27305564	MD04G1182100	62.1	2356	3795	Chr11	+	11848950	11853218	MD11G1131000	37.9
i1_LQ_Mix0_5d_c37030/f1p0/1499	7	740	Chr05	-	12774952	12785915	notsure	48.9	741	1500	Chr14	+	31867810	31980672	MD14G1240400,MD14G1240900,MD14G1240700,MD14G1240600,MD14G1241000,MD14G1239700,MD14G1240500,MD14G1240100	50.7
i0_LQ_Mix0_5d_c3054/f1p1/962	1	166	Chr12	-	17893180	17893345	notsure	17.2	167	962	Chr04	+	22739516	22742404	MD04G1139000	82.4
i3_LQ_Mix0_5d_c4893/f1p31/3924	1	1935	Chr09	-	17374174	17377465	MD09G1193900	48.8	1936	3964	Chr03	-	5765282	5771313	MD03G1070600	51.2
i2_LQ_Mix0_5d_c11457/f1p59/2288	23	1712	Chr16	-	5647714	5652276	notsure	73.6	1713	2295	Chr05	+	44187802	44188830	MD05G1311800	25.4
i2_LQ_Mix0_5d_c179769/f1p75/2014	2	1536	Chr12	-	9293181	9294718	notsure	76.2	1537	2015	Chr12	+	22462906	22463384	MD12G1145400	23.8
i2_LQ_Mix0_5d_c118243/f1p43/2894	1	2582	Chr17	+	1971317	1974265	MD17G1027400	89.1	2583	2898	Chr09	+	1715244	1715757	MD09G1027400	10.9
i2_LQ_Mix0_5d_c64553/f1p11/2937	1	2036	Chr01	-	9004195	9007894	MD01G1022700	69.3	2037	2928	Chr15	+	36319957	36320966	MD15G1329800	30.3
i2_LQ_Mix0_5d_c135997/f1p14/3027	1	1888	Chr08	+	19728378	19731427	MD08G1166200,MD08G1166300	62.2	1889	3034	Chr16	-	14077578	14078723	notsure	37.8
i3_LQ_Mix0_5d_c5120/f1p0/3995	1	3501	Chr03	-	35967518	36182232	MD03G1279500,MD03G1278600,MD03G1278700,MD03G1278400,MD03G1277700,MD03G1278500,MD03G1277600,MD03G1277500,MD03G1279700,MD03G1279600,MD03G1280000,MD03G1279100,MD03G1280300,MD03G1279000,MD03G1280200,MD03G1277900,MD03G1279200,MD03G1279800,MD03G1277800,MD03G1278800,MD03G1278900,MD03G1278000,MD03G1278100	86.8	3502	4033	Chr16	+	5865099	5865625	notsure	13.2
i3_LQ_Mix0_5d_c15905/f1p0/3659	1	2195	Chr06	+	34628144	34630336	MD06G1213500	59.7	2196	3678	Chr02	-	35599457	35602998	notsure	40.3
i1_LQ_Mix0_5d_c95345/f1p0/1890	1	256	Chr08	+	30292437	30292690	MD08G1235300	13.1	257	1960	Chr15	+	52715488	52721253	MD15G1426600	86.9
i1_LQ_Mix0_5d_c68879/f2p0/1169	2	171	Chr07	+	36007383	36007552	MD07G1301300	14.6	172	1162	Chr01	+	31876811	31878321	MD01G1229400	85.3
i2_HQ_Mix0_5d_c1224/f33p11/2985	1	2065	Chr01	-	9004195	9007921	MD01G1022700	69.2	2066	2982	Chr15	+	36319957	36320991	MD15G1329800	30.8
i2_HQ_Mix0_5d_c49822/f2p1/2613	6	500	Chr00	-	44315644	44316753	MD00G1186600	19	501	2610	Chr09	-	2007384	2009685	MD09G1033100	80.8
i1_LQ_Mix0_5d_c52933/f2p0/1183	4	507	Chr11	-	10608286	10608756	MD11G1117100	42.4	508	1188	Chr03	-	8836090	8836771	notsure	57.3
i3_LQ_Mix0_5d_c19632/f1p22/3249	1	2016	Chr10	+	39256786	39267152	MD10G1307100,MD10G1307200	61.4	2017	3285	Chr00	+	40665950	40670423	MD00G1175400	38.6
i2_LQ_Mix0_5d_c151100/f1p7/2196	1	930	Chr02	-	30229257	30251667	MD02G1250800	42.4	931	2190	Chr02	-	30430808	30432067	MD02G1252600	57.5
i1_LQ_Mix0_5d_c11611/f1p0/1958	1	1035	Chr03	+	2474692	2476478	MD03G1030600	52.8	1036	1959	Chr05	+	44840516	44842325	MD05G1321100	47.2
i2_LQ_Mix0_5d_c149554/f1p8/2277	1	553	Chr00	-	15994200	15995677	notsure	24.3	554	2278	Chr12	-	25063317	25140867	MD12G1169400,MD12G1170500,MD12G1170200,MD12G1170000,MD12G1169700,MD12G1170400,MD12G1169300,MD12G1169600,MD12G1169200,MD12G1169500,MD12G1170100,MD12G1170300	75.7
i1_LQ_Mix0_5d_c9511/f1p58/1722	1	1473	Chr15	+	2311524	2314968	MD15G1033000	85.3	1474	1721	Chr14	+	25327471	25327718	MD14G1159200	14.4
i2_LQ_Mix0_5d_c94881/f1p39/2918	1	2285	Chr03	-	13958916	13962903	MD03G1137700	78	2286	2929	Chr10	-	35265360	35265937	MD10G1258600	22
i2_LQ_Mix0_5d_c97693/f1p5/2359	4	898	Chr14	-	29824116	29825911	MD14G1213900	37.9	899	2360	Chr06	-	33761059	33762802	MD06G1203300	61.9
i2_LQ_Mix0_5d_c22949/f1p2/2113	1	1536	Chr15	+	28461924	28463460	MD15G1299700	72.5	1537	2120	Chr04	-	11605351	11605932	notsure	27.5
i2_LQ_Mix0_5d_c52201/f1p7/2402	1	1842	Chr15	+	2311519	2314803	MD15G1033000	76.8	1843	2400	Chr08	+	25430593	25431370	notsure	23.2
i3_LQ_Mix0_5d_c22032/f1p0/3469	1	2432	Chr15	+	17043008	17045440	notsure	69.9	2433	3479	Chr10	-	37219408	37220467	notsure	30.1
i3_HQ_Mix0_5d_c27876/f3p0/3745	1	3364	Chr11	+	38288701	38452761	MD11G1268600,MD11G1267600,MD11G1268200,MD11G1267900,MD11G1268300,MD11G1268400,MD11G1267800,MD11G1268500,MD11G1268100,MD11G1267700	89.7	3365	3741	Chr16	-	24199913	24201153	notsure	10.1
i1_LQ_Mix0_5d_c34886/f1p0/1856	1	1589	Chr15	-	50752557	50754145	MD15G1407300	85.2	1590	1864	Chr04	-	15381453	15381727	notsure	14.8
i2_LQ_Mix0_5d_c65872/f1p3/2811	10	438	Chr07	-	32097061	32097442	MD07G1253700	15.2	439	2818	Chr01	-	28128037	28132019	MD01G1182800	84.5
i4_LQ_Mix0_5d_c5018/f1p0/4859	1	3160	Chr13	-	805736	808911	notsure	64.9	3161	4869	Chr03	+	36247128	36252055	MD03G1281900,MD03G1281800,MD03G1281700	35.1
i1_HQ_Mix0_5d_c35691/f5p2/1693	19	634	Chr15	-	23408122	23409658	MD15G1270100	36.4	635	1694	Chr02	-	12956593	12959714	notsure	62.6
i1_LQ_Mix0_5d_c31987/f1p0/1530	1	475	Chr12	+	960393	960879	MD12G1009100	31	476	1532	Chr14	+	731728	733529	MD14G1006600	69
i1_LQ_Mix0_5d_c124833/f1p0/1885	1	824	Chr16	+	38918635	38919459	MD16G1283000	43.6	825	1888	Chr00	-	48263539	48264605	MD00G1202200	56.4
i1_LQ_Mix0_5d_c21672/f1p4/1339	1	1235	Chr15	+	6062023	6065774	MD15G1087100	89.7	1236	1375	Chr09	-	33543406	33543545	notsure	10.2
i1_LQ_Mix0_5d_c135603/f1p15/1526	1	1214	Chr11	+	35352399	35354960	MD11G1243300	79.3	1215	1529	Chr03	+	27963014	27963328	notsure	20.6
i1_LQ_Mix0_5d_c47334/f1p0/1440	1	169	Chr11	-	37394853	37395021	MD11G1259900	11.7	170	1441	Chr03	-	32589105	32591974	MD03G1240700	88.3
i1_LQ_Mix0_5d_c183021/f1p0/1031	1	748	Chr16	+	19844754	19845514	MD16G1209800	72.6	749	1031	Chr06	+	7210532	7210813	notsure	27.4
i1_HQ_Mix0_5d_c170124/f13p0/1843	1	1553	Chr06	+	36457036	36459224	MD06G1233300	84.3	1554	1843	Chr14	+	31902460	31902739	MD14G1240100	15.7
i2_HQ_Mix0_5d_c5364/f4p0/2676	1	370	Chr07	+	22676962	22677677	MD07G1155800	13.8	371	2678	Chr09	-	34899649	35012229	MD09G1273300,MD09G1272800,MD09G1273200,MD09G1272700,MD09G1273800,MD09G1273100,MD09G1273500,MD09G1273000,MD09G1273400,MD09G1273700	86.1
i2_LQ_Mix0_5d_c83693/f1p3/2358	6	1142	Chr02	+	24880002	24883387	MD02G1217000	46.2	1143	2459	Chr02	+	31797754	31799161	MD02G1264000,MD02G1263900	53.6
i2_LQ_Mix0_5d_c81654/f1p40/2199	2	353	Chr08	-	377114	378237	MD08G1003800	16	354	2201	Chr15	+	54794619	54796466	notsure	84
i2_LQ_Mix0_5d_c76870/f1p71/2433	5	2000	Chr11	+	6270677	6272679	notsure	82	2001	2434	Chr11	+	11231319	11231752	notsure	17.8
i1_LQ_Mix0_5d_c160578/f1p0/1746	1	337	Chr04	-	9635124	9635462	notsure	19.3	338	1746	Chr05	-	31560189	31561596	notsure	80.7
i1_HQ_Mix0_5d_c45277/f5p0/1711	1	719	Chr15	+	19759319	19763196	MD15G1240100	42	720	1711	Chr00	-	8779346	8781326	MD00G1047200	58
i1_LQ_Mix0_5d_c77776/f1p2/1837	1	310	Chr15	+	53905917	53906955	notsure	16.9	311	1838	Chr03	-	33791002	33797015	MD03G1249900	83.1
i2_HQ_Mix0_5d_c6406/f2p6/2204	2	1751	Chr15	+	2311519	2314803	MD15G1033000	79.3	1752	2206	Chr08	+	25430593	25431269	notsure	20.6
i2_LQ_Mix0_5d_c131747/f1p3/2992	4	1504	Chr05	-	23313155	23321697	MD05G1114500	50.1	1505	2996	Chr10	+	19350357	19354763	MD10G1116400	49.8
i1_LQ_Mix0_5d_c116602/f1p6/1479	1	489	Chr05	-	4108203	4108698	MD05G1025100	33.2	490	1472	Chr03	-	1479605	1481530	MD03G1019100	66.6
i1_LQ_Mix0_5d_c96091/f1p0/1913	19	1326	Chr05	+	36459592	36550999	MD05G1231400,MD05G1231000,MD05G1231900,MD05G1232200,MD05G1231700,MD05G1231300,MD05G1232400,MD05G1231600,MD05G1231200,MD05G1232500,MD05G1231500,MD05G1232100,MD05G1231100,MD05G1230900	66.3	1327	1974	Chr10	-	30026768	30027707	MD10G1202600	32.8
i1_LQ_Mix0_5d_c95262/f1p0/1895	6	284	Chr00	-	48605570	48605849	MD00G1203000	14.7	285	1895	Chr05	-	21914321	21916511	MD05G1105800	85
i3_HQ_Mix0_5d_c3103/f3p0/3284	19	373	Chr12	-	25071583	25071938	notsure	10.8	374	3285	Chr04	-	24394026	24603035	MD04G1157000,MD04G1157200,MD04G1156800,MD04G1157600,MD04G1156500,MD04G1157700,MD04G1157100,MD04G1156900,MD04G1157500,MD04G1156300,MD04G1156700,MD04G1156200,MD04G1157800,MD04G1157400,MD04G1157300,MD04G1156400	88.6
i2_LQ_Mix0_5d_c18326/f1p3/2746	1	2308	Chr06	+	23616746	23619070	MD06G1099700	83.7	2309	2757	Chr03	+	16369116	16369564	notsure	16.3
i2_LQ_Mix0_5d_c31786/f1p2/2925	2	1818	Chr13	-	38739663	38744840	MD13G1277900	61.8	1819	2941	Chr00	-	51397146	51399334	MD00G1214800	38.2
i2_HQ_Mix0_5d_c129944/f2p10/2121	1	1864	Chr15	+	2311514	2314968	MD15G1033000	87.8	1865	2122	Chr14	+	25327471	25327728	MD14G1159200	12.2
i0_LQ_Mix0_5d_c1342/f1p0/608	1	515	Chr12	+	21998823	22000221	MD12G1141500	83.3	516	615	Chr04	+	21486472	21486571	MD04G1128900	16.2
i1_LQ_Mix0_5d_c104114/f2p0/1143	1	750	Chr01	+	27520977	27521955	MD01G1173600	66	751	1136	Chr11	+	1793671	1794058	notsure	34
i2_LQ_Mix0_5d_c115899/f1p0/2147	1	1809	Chr15	-	50621425	50624052	MD15G1405500	81.1	1810	2231	Chr14	+	673681	674102	notsure	18.9
i1_LQ_Mix0_5d_c6472/f1p13/1532	1	1277	Chr10	+	41211840	41215938	MD10G1334800	83.4	1278	1532	Chr07	+	27939826	27940080	notsure	16.6
i0_LQ_Mix0_5d_c10130/f1p0/375	1	142	Chr03	+	6726387	6726849	MD03G1082800	37.7	143	377	Chr11	+	7585197	7585431	notsure	62.3
i1_LQ_Mix0_5d_c161182/f1p0/1490	4	652	Chr08	-	3657545	3658894	MD08G1047900	43.6	653	1490	Chr14	+	32128502	32129709	notsure	56.2
i2_LQ_Mix0_5d_c134540/f1p20/2259	8	245	Chr13	-	1278572	1278810	notsure	10.5	246	2263	Chr04	-	3038960	3041800	MD04G1026100	89.2
i1_HQ_Mix0_5d_c162121/f2p0/1977	1	864	Chr16	+	38918551	38919415	MD16G1283000	43.7	865	1975	Chr00	-	48263537	48296265	MD00G1202200	56.3
i3_LQ_Mix0_5d_c7990/f1p1/3138	1	1327	Chr16	+	38914864	38916191	MD16G1283000	42.2	1328	3141	Chr06	+	35416194	35419007	MD06G1222800	57.8
i3_LQ_Mix0_5d_c5001/f1p0/3871	2	3529	Chr07	+	32609994	32618178	MD07G1260000,MD07G1260100	89.8	3530	3928	Chr15	+	52123984	52124383	notsure	10.2
i1_LQ_Mix0_5d_c100538/f1p0/1487	1	1227	Chr15	+	2311514	2314803	MD15G1033000	82	1228	1495	Chr09	+	1813231	1813624	MD09G1029300	17.9
i1_LQ_Mix0_5d_c181566/f1p0/1016	1	702	Chr06	+	33901851	33902706	notsure	69.1	703	1016	Chr11	+	1793677	1793992	notsure	30.9
i1_LQ_Mix0_5d_c96665/f1p3/1918	1	291	Chr10	-	11753855	11754144	MD10G1080100	15.2	292	1919	Chr05	-	13474139	13476470	MD05G1069700	84.8
i1_LQ_Mix0_5d_c160029/f1p0/1653	1	929	Chr16	+	38918180	38919108	MD16G1283000	56.2	930	1648	Chr08	-	5037109	5043776	MD08G1063900,MD08G1064000	43.5
i1_HQ_Mix0_5d_c149469/f6p0/1415	2	600	Chr07	+	25543540	25545367	MD07G1176100	42.3	601	1417	Chr01	+	22309190	22310498	MD01G1110300	57.7
i2_LQ_Mix0_5d_c117858/f1p46/2697	2	1743	Chr17	-	28948676	28950415	MD17G1240300	64.5	1744	2699	Chr17	-	22668376	22677890	MD17G1190300,MD17G1190200	35.4
i1_LQ_Mix0_5d_c157302/f1p0/1364	1	398	Chr15	+	19759329	19761177	MD15G1240100	29.2	399	1365	Chr00	-	8779344	8781299	MD00G1047200	70.8
i1_LQ_Mix0_5d_c30135/f1p0/1958	1	1650	Chr06	+	37004794	37006447	notsure	85.1	1651	1940	Chr14	-	31321919	31322208	MD14G1233000	14.9
i2_LQ_Mix0_5d_c4495/f1p99/2431	1	749	Chr16	+	38917872	38918620	MD16G1283000	30.8	750	2427	Chr09	+	14794852	14797631	MD09G1174400	69.1
i4_LQ_Mix0_5d_c13288/f1p0/4080	1	645	Chr10	+	39223237	39226166	MD10G1306500	15.7	646	4097	Chr05	-	44770815	44775265	MD05G1320400,MD05G1320300	84.3
i2_LQ_Mix0_5d_c11054/f1p1/2585	4	590	Chr10	+	8328798	8329420	MD10G1061800	21.5	591	2726	Chr10	-	10855490	10857791	MD10G1076100	78.4
i2_LQ_Mix0_5d_c116783/f1p11/2680	1	801	Chr10	-	997704	1037673	MD10G1006800,MD10G1006900	29.9	802	2677	Chr10	-	1183608	1189280	MD10G1007700	70.1
i3_LQ_Mix0_5d_c19848/f1p0/3758	1	1706	Chr12	-	23676684	23678992	MD12G1156200	44.5	1707	3832	Chr16	-	8525727	8527852	notsure	55.5
i2_LQ_Mix0_5d_c80049/f1p20/2790	1	2505	Chr00	-	16049117	16057330	MD00G1080400	89.7	2506	2792	Chr06	+	18216478	18216766	notsure	10.3
i2_LQ_Mix0_5d_c119732/f1p2/2466	1	1155	Chr09	-	20486917	20488072	notsure	46.5	1156	2484	Chr06	+	19557343	19558679	notsure	53.5
i1_LQ_Mix0_5d_c2867/f2p0/1382	5	1225	Chr00	-	18511137	18515618	MD00G1089700	87.2	1226	1400	Chr03	+	31024818	31024992	MD03G1224500	12.5
i4_LQ_Mix0_5d_c10672/f1p3/4573	1	663	Chr00	-	5202506	5203167	MD00G1031200	14.5	664	4575	Chr05	+	34185613	34189919	MD05G1210500	85.5
i2_LQ_Mix0_5d_c113808/f1p2/2613	1	554	Chr00	+	20374970	20377598	MD00G1097100	21.2	555	2607	Chr12	-	22614366	22629018	notsure	78.7
i2_LQ_Mix0_5d_c66850/f1p0/2156	1	1587	Chr13	-	5566189	5568039	MD13G1079300	73.3	1588	2166	Chr15	-	43595147	43595725	notsure	26.7
i1_HQ_Mix0_5d_c58960/f3p0/1975	1	613	Chr07	-	32216035	32220014	MD07G1254900	31	614	1979	Chr07	-	7929820	7931196	MD07G1081600	69
i2_LQ_Mix0_5d_c117216/f1p18/2219	1	1693	Chr15	+	2311519	2314803	MD15G1033000	75.7	1694	2235	Chr08	+	25430593	25431264	notsure	24.3
i1_LQ_Mix0_5d_c33479/f1p5/1533	2	1309	Chr10	+	764284	765926	MD10G1004700	84.6	1310	1547	Chr13	+	39193950	39194187	MD13G1279000	15.4
i2_LQ_Mix0_5d_c136898/f1p0/2871	1	1691	Chr06	-	23955823	23957517	MD06G1102500	58.6	1692	2888	Chr09	-	25440549	25441747	notsure	41.4
i2_LQ_Mix0_5d_c55067/f1p9/2885	1	2427	Chr11	-	8267543	8272660	MD11G1099200	84	2428	2888	Chr03	-	7392415	7392866	MD03G1089900	16
i5_LQ_Mix0_5d_c1440/f1p3/5816	2	1226	Chr10	+	7471131	7472777	MD10G1054700	20.8	1227	5877	Chr00	+	44672562	44677556	notsure	79.1
i2_LQ_Mix0_5d_c10265/f1p6/2965	1	2139	Chr15	-	2838809	2844476	MD15G1040300,MD15G1040200,MD15G1040400	71.9	2140	2973	Chr08	+	4460075	4461502	MD08G1057200	28.1
i2_LQ_Mix0_5d_c71683/f1p18/2311	1	1647	Chr00	-	31190959	31195404	MD00G1143300	71.2	1648	2298	Chr15	-	2739480	2740400	MD15G1039000,MD15G1038900	28.1
i1_LQ_Mix0_5d_c98535/f1p3/1566	2	370	Chr08	+	30292377	30294495	MD08G1235300	23.5	371	1568	Chr11	-	5248018	5249218	MD11G1060500	76.4
i3_HQ_Mix0_5d_c8660/f2p103/3309	1	2411	Chr02	-	35927683	35934524	MD02G1306200	72.8	2412	3284	Chr07	-	1590344	1591954	MD07G1018400	26.4
i2_HQ_Mix0_5d_c64835/f2p20/2175	1	1015	Chr05	-	40670798	40671812	MD05G1271000	46.7	1016	2175	Chr10	-	34279597	34280769	MD10G1250100	53.3
i3_LQ_Mix0_5d_c21931/f1p0/3759	1	2657	Chr01	-	10752954	10755612	notsure	70.5	2658	3770	Chr15	+	7069712	7070825	notsure	29.5
i2_LQ_Mix0_5d_c83058/f1p3/2714	15	867	Chr06	-	29557629	29728477	MD06G1153600,MD06G1153000,MD06G1153900,MD06G1152900,MD06G1153500	31.4	868	2719	Chr11	+	3078691	3080763	MD11G1034900	68.1
i0_LQ_Mix0_5d_c8316/f1p0/640	1	285	Chr07	+	10267143	10267466	notsure	44.3	286	644	Chr08	-	9928448	9929229	MD08G1112300	55.7
i2_HQ_Mix0_5d_c108798/f17p4/2490	15	2218	Chr08	-	15349999	15352199	MD08G1150700	88.5	2219	2490	Chr00	-	31681017	31681284	MD00G1144700	10.9
i1_LQ_Mix0_5d_c36364/f1p33/1343	1	385	Chr03	+	26270759	26271143	MD03G1191000	28.7	386	1343	Chr09	+	12941789	12944335	MD09G1160400	71.3
i0_LQ_Mix0_5d_c10848/f1p0/918	1	739	Chr12	+	11103671	11105321	notsure	77	740	960	Chr16	-	40352549	40352776	notsure	23
i1_LQ_Mix0_5d_c16811/f1p13/1960	1	397	Chr11	+	16979075	16979746	MD11G1164600	20.2	398	1962	Chr04	+	4205250	4206814	MD04G1037700	79.8
i1_LQ_Mix0_5d_c79227/f1p7/1563	3	481	Chr05	-	27186175	27187349	notsure	29.2	482	1643	Chr15	+	41327267	41349638	MD15G1348800,MD15G1348900,MD15G1349000	70.7
i0_LQ_Mix0_5d_c5344/f1p0/734	1	650	Chr00	-	15368895	15377715	MD00G1076600	86.9	651	748	Chr09	-	10122467	10122564	notsure	13.1
i1_LQ_Mix0_5d_c51240/f1p0/1544	1	1295	Chr08	-	25209954	25211247	MD08G1195400	83.9	1296	1544	Chr01	-	13089250	13089503	MD01G1038000	16.1
i3_LQ_Mix0_5d_c4920/f1p3/3080	3	395	Chr07	-	7224856	7225259	MD07G1075500	12.5	396	3156	Chr02	+	26225061	26227806	notsure	87.5
i2_LQ_Mix0_5d_c107692/f1p8/2086	1	1573	Chr10	-	35272973	35277232	MD10G1258700	75.4	1574	2086	Chr03	-	13964174	13964662	MD03G1137800	24.6
i2_LQ_Mix0_5d_c173839/f16p9/2144	1	472	Chr00	-	50127816	50129229	MD00G1205700	22	473	2144	Chr08	-	12294950	12301701	MD08G1130500	78
i2_LQ_Mix0_5d_c61432/f1p34/2645	1	304	Chr00	-	10021802	10022166	MD00G1053600	11.5	305	2645	Chr17	-	14584691	14739528	MD17G1154300,MD17G1154500,MD17G1154400	88.5
i2_LQ_Mix0_5d_c134777/f1p37/2659	1	2283	Chr02	-	32030740	32034218	MD02G1266200	85.6	2284	2667	Chr07	+	4971603	4971985	MD07G1053800	14.4
i2_HQ_Mix0_5d_c30461/f2p6/2380	2	2072	Chr15	+	432002	435629	MD15G1008200	87	2073	2380	Chr08	+	693549	693865	MD08G1009300	12.9
i1_HQ_Mix0_5d_c141503/f3p0/1892	1	800	Chr16	+	38918635	38919435	MD16G1283000	42.3	801	1892	Chr00	-	48263538	48296237	MD00G1202200	57.7
i2_HQ_Mix0_5d_c16449/f6p5/2403	1	1844	Chr15	+	2311520	2314803	MD15G1033000	76.7	1845	2404	Chr08	+	25430593	25431372	notsure	23.3
i2_LQ_Mix0_5d_c150483/f1p0/2419	1	2289	Chr07	+	113083	117302	MD07G1000500	89.7	2290	2551	Chr12	+	30226267	30226528	notsure	10.3
i2_HQ_Mix0_5d_c140191/f2p16/2083	1	1278	Chr05	+	39960516	39963582	MD05G1264400,MD05G1264500	61.4	1279	2083	Chr05	-	36790457	36791261	MD05G1236700	38.6
i2_LQ_Mix0_5d_c138171/f1p9/2963	2	2060	Chr01	-	9004195	9007917	MD01G1022700	69.2	2061	2974	Chr15	+	36319957	36320988	MD15G1329800	30.7
i3_LQ_Mix0_5d_c9621/f1p0/3382	7	974	Chr12	-	29447819	29449618	MD12G1216900	27.7	975	3484	Chr04	-	28881503	28884597	MD04G1203200	71.8
i2_LQ_Mix0_5d_c152672/f1p8/2104	1	1533	Chr09	-	10368316	10374401	MD09G1135000	72.8	1534	2107	Chr12	-	33015533	33016106	MD12G1263700	27.2
i1_LQ_Mix0_5d_c46729/f1p18/1606	7	853	Chr08	-	11893606	11984132	MD08G1126800,MD08G1126600,MD08G1127400,MD08G1127300	50.9	854	1655	Chr15	+	16312539	16344337	MD15G1205100,MD15G1205300,MD15G1205500	48.2
i2_HQ_Mix0_5d_c173600/f2p0/2059	1	1806	Chr01	-	20170986	20172787	MD01G1088700	87.7	1807	2059	Chr07	-	23355728	23355980	notsure	12.3
i2_LQ_Mix0_5d_c10707/f1p3/2445	5	1122	Chr02	+	8055527	8099203	MD02G1101100,MD02G1101000	45.8	1123	2433	Chr15	+	18173004	18175305	MD15G1223600	53.7
i2_LQ_Mix0_5d_c65989/f1p1/2332	20	813	Chr12	+	9108210	9109413	MD12G1075200	34	814	2334	Chr12	-	9733045	9735475	MD12G1079800	65.2
i1_LQ_Mix0_5d_c65304/f1p7/1974	2	1617	Chr16	-	26763385	26789852	MD16G1245400,MD16G1245300	81.6	1618	1980	Chr09	+	16236842	16237204	notsure	18.3
i1_LQ_Mix0_5d_c51491/f1p4/1386	2	554	Chr09	-	34358109	34371167	MD09G1269300,MD09G1269500	39.4	555	1404	Chr05	+	44851767	44852753	MD05G1321200	60.5
i2_LQ_Mix0_5d_c149703/f1p2/2718	2	2410	Chr12	-	16027180	16030644	MD12G1102500	88.7	2411	2717	Chr06	-	948728	949034	MD06G1008700	11.3
i1_LQ_Mix0_5d_c9933/f1p1/1708	4	1368	Chr06	-	27941704	27945692	MD06G1134900	79.9	1369	1709	Chr10	+	34217972	34218524	MD10G1249600	20
i3_LQ_Mix0_5d_c28470/f1p0/3914	1	502	Chr17	+	32283100	32283607	notsure	12.8	503	3922	Chr05	-	33100528	33138931	MD05G1202200,MD05G1202300,MD05G1202500	87.2
i1_LQ_Mix0_5d_c161943/f1p33/1698	3	924	Chr07	+	27781157	27783180	MD07G1199400	54.1	925	1703	Chr01	+	24438080	24439511	MD01G1134700	45.7
i1_LQ_Mix0_5d_c148745/f1p0/1190	1	790	Chr03	-	31551389	31552299	notsure	66.3	791	1191	Chr10	-	11136947	11137434	notsure	33.7
i1_LQ_Mix0_5d_c37513/f1p1/2003	1	879	Chr07	-	36545603	36546703	MD07G1310700	43.8	880	2008	Chr14	+	5607886	5609019	MD14G1055100	56.2
i1_LQ_Mix0_5d_c64319/f1p15/1748	1	1544	Chr07	+	113145	117302	MD07G1000500	88.2	1545	1747	Chr12	+	30226267	30226468	notsure	11.6
i4_LQ_Mix0_5d_c11372/f1p0/4744	1	4095	Chr11	-	15488693	15495046	MD11G1159100	86.2	4096	4749	Chr03	-	13791134	13791899	MD03G1137000	13.8
i1_HQ_Mix0_5d_c181422/f5p0/1601	1	1362	Chr10	-	17574272	17575663	notsure	85.4	1363	1595	Chr10	+	15640346	15640579	notsure	14.6
i2_LQ_Mix0_5d_c46090/f1p2/2230	1	238	Chr00	+	1143146	1143577	notsure	10.6	239	2235	Chr05	+	42696782	42698759	notsure	89.1
i2_LQ_Mix0_5d_c77047/f1p12/3112	2	2073	Chr16	-	23962546	23971433	MD16G1233000,MD16G1232900	66.3	2074	3121	Chr14	-	2702765	3170547	MD14G1032300,MD14G1035300,MD14G1032900,MD14G1035200,MD14G1034500,MD14G1034400,MD14G1034600,MD14G1032800,MD14G1035000,MD14G1033300,MD14G1034700,MD14G1033200,MD14G1034300,MD14G1031900,MD14G1034800,MD14G1034900,MD14G1033400,MD14G1033800,MD14G1031100,MD14G1032600,MD14G1032700,MD14G1034200,MD14G1035500,MD14G1032500,MD14G1034100,MD14G1032200,MD14G1031400,MD14G1033100,MD14G1031200,MD14G1033000	33.5
i0_LQ_Mix0_5d_c8880/f1p0/864	1	141	Chr02	+	4190773	4190913	notsure	16.2	142	871	Chr07	+	2047730	2048460	notsure	83.8
i1_LQ_Mix0_5d_c96138/f1p0/1752	10	221	Chr05	+	36261472	36261686	notsure	12.1	222	1752	Chr00	+	16037254	16045699	MD00G1080100	87.4
i1_LQ_Mix0_5d_c50036/f1p0/1662	1	1490	Chr05	+	37120021	37129422	MD05G1240600	89.5	1491	1664	Chr10	+	40953599	40953772	notsure	10.5
i2_HQ_Mix0_5d_c173053/f10p4/2765	14	351	Chr06	-	34472725	34473251	MD06G1212200	12.2	352	2770	Chr14	-	30418197	30421987	MD14G1222700	87.3
i2_LQ_Mix0_5d_c46792/f1p13/2513	1	1043	Chr13	+	4563739	4565221	MD13G1066000	41.5	1044	2516	Chr13	-	3281273	3282747	notsure	58.5
i1_LQ_Mix0_5d_c94123/f2p5/1931	1	301	Chr02	-	30587634	30587934	notsure	15.5	302	1947	Chr15	+	53873409	53875184	MD15G1438900	84.5
i2_HQ_Mix0_5d_c32570/f2p0/2944	1	636	Chr07	-	28388633	28389433	notsure	21.6	637	2944	Chr16	-	16112162	16116033	MD16G1186700	78.3
i2_HQ_Mix0_5d_c48231/f2p4/2148	1	1864	Chr03	+	25920252	25922937	MD03G1188800	86.7	1865	2141	Chr07	+	32722128	32722404	notsure	12.9
i5_LQ_Mix0_5d_c864/f1p0/5442	1	1034	Chr09	-	9612926	9613963	notsure	19	1035	5448	Chr02	-	3290994	3300009	MD02G1040700,MD02G1040600	81
i2_LQ_Mix0_5d_c136404/f1p8/2890	1	1617	Chr10	+	39257114	39267152	MD10G1307100,MD10G1307200	56	1618	2889	Chr00	+	40665950	40670422	MD00G1175400	44
i1_LQ_Mix0_5d_c133278/f1p0/1380	1	1030	Chr05	-	4977563	4978593	MD05G1031000	74.5	1031	1382	Chr05	-	21176728	21177103	MD05G1102400	25.5
i1_HQ_Mix0_5d_c50928/f2p18/1722	1	842	Chr05	-	11199133	11200707	notsure	48.9	843	1722	Chr11	+	1793185	1794066	notsure	51.1
i1_LQ_Mix0_5d_c99244/f1p0/1643	1	1400	Chr16	-	30354325	30387622	MD16G1258100,MD16G1258000,MD16G1258200	81.3	1401	1721	Chr05	+	40078519	40175024	MD05G1266000,MD05G1266400,MD05G1266800,MD05G1266300,MD05G1266200,MD05G1266600,MD05G1266100,MD05G1266500	18.7
i2_LQ_Mix0_5d_c101277/f1p18/2372	2	1216	Chr02	+	29161046	29164409	MD02G1241800	51.2	1217	2371	Chr11	-	40886208	40887362	notsure	48.7
i2_HQ_Mix0_5d_c104224/f3p2/2537	1	488	Chr04	-	23868236	23868952	notsure	19.2	489	2539	Chr17	-	14584730	14598279	MD17G1154300	80.8
i3_HQ_Mix0_5d_c37353/f23p0/3757	1	3364	Chr11	+	38288701	38452761	MD11G1268600,MD11G1267600,MD11G1268200,MD11G1267900,MD11G1268300,MD11G1268400,MD11G1267800,MD11G1268500,MD11G1268100,MD11G1267700	89.5	3365	3758	Chr16	-	24199896	24201153	notsure	10.5
i2_LQ_Mix0_5d_c81466/f1p6/2300	1	484	Chr05	-	3573189	3573686	notsure	21	485	2306	Chr10	+	4289028	4290875	notsure	79
i2_LQ_Mix0_5d_c95480/f1p2/2113	18	1874	Chr17	-	12360993	12362928	MD17G1137900	87.6	1875	2115	Chr11	+	33511142	33511381	notsure	11.4
i3_HQ_Mix0_5d_c12972/f4p0/3136	1	810	Chr07	+	34984925	34986094	MD07G1288900	25.8	811	3136	Chr01	+	31157199	31159614	MD01G1219200	74.2
i2_LQ_Mix0_5d_c50435/f1p22/2271	1	2045	Chr09	+	2343758	2384267	MD09G1038500,MD09G1039000,MD09G1038900,MD09G1038700	89.7	2046	2280	Chr11	+	5545380	5545614	notsure	10.3
i0_LQ_Mix0_5d_c5854/f1p0/754	1	639	Chr15	-	32989321	32991839	notsure	84.7	640	754	Chr15	-	12171929	12172043	notsure	15.3
i2_LQ_Mix0_5d_c11512/f2p38/2759	1	2221	Chr03	-	13958982	13962904	MD03G1137700	80.3	2222	2767	Chr10	-	35265486	35266003	MD10G1258600	19.7
i2_LQ_Mix0_5d_c79631/f1p4/3013	5	1001	Chr16	+	17203411	17204401	MD16G1193900	33	1002	3015	Chr13	+	16719240	16721253	MD13G1193000	66.8
i1_LQ_Mix0_5d_c47378/f1p2/2030	2	1029	Chr03	+	2474696	2476478	MD03G1030600	50.8	1030	2022	Chr05	+	44839474	44841426	MD05G1321100	49.1
i3_LQ_Mix0_5d_c30293/f1p0/3689	10	1211	Chr05	-	29076217	29079335	MD05G1162100	31.2	1212	3852	Chr10	+	27269364	27274818	MD10G1178900	68.6
i1_HQ_Mix0_5d_c43749/f2p0/1983	1	306	Chr00	-	10021805	10022172	MD00G1053600	15.4	307	1983	Chr17	-	14584733	14597910	MD17G1154300	84.6
i2_LQ_Mix0_5d_c65916/f1p1/2385	1	299	Chr15	+	5908402	5908973	MD15G1085500	12.5	300	2385	Chr14	+	31572264	31575144	notsure	87.5
i2_LQ_Mix0_5d_c10991/f1p325/2785	3	1048	Chr16	+	19844460	19845518	MD16G1209800	37.6	1049	2784	Chr03	+	8982972	8985878	MD03G1104700,MD03G1104600,MD03G1104900,MD03G1104800	62.4
i2_LQ_Mix0_5d_c52986/f1p66/2954	4	2590	Chr11	-	219591	223884	MD11G1002400	87.6	2591	2939	Chr03	-	174383	174739	MD03G1002500	11.8
i3_LQ_Mix0_5d_c3788/f1p0/3169	1	2668	Chr10	-	5183757	5226444	MD10G1039800,MD10G1039900,MD10G1040000,MD10G1039500,MD10G1039600	84.1	2669	3148	Chr07	+	34442546	34443323	MD07G1280600	15.1
i2_HQ_Mix0_5d_c13057/f2p1/2031	3	463	Chr16	+	11312685	11313249	MD16G1145400	22.7	464	2034	Chr02	-	32604992	32608594	MD02G1271400	77.2
i1_LQ_Mix0_5d_c129660/f1p5/1892	1	801	Chr16	+	38918635	38919435	MD16G1283000	42.4	802	1891	Chr00	-	48263538	48296237	MD00G1202200	57.6
i2_LQ_Mix0_5d_c25208/f1p6/2627	1	681	Chr17	+	32282779	32551788	MD17G1264100,MD17G1263100,MD17G1262300,MD17G1263500,MD17G1263600,MD17G1264900,MD17G1262000,MD17G1263400,MD17G1261900,MD17G1264300,MD17G1263300,MD17G1264700,MD17G1263700,MD17G1262400,MD17G1264600,MD17G1263900,MD17G1262900,MD17G1263000,MD17G1262600,MD17G1264400	25.9	682	2628	Chr09	+	987028	989869	notsure	74.1
i2_LQ_Mix0_5d_c100612/f1p12/2817	26	2519	Chr04	+	31538876	31562460	MD04G1236800,MD04G1236900,MD04G1236600,MD04G1236700	88.2	2520	2828	Chr12	+	32365588	32365889	notsure	10.9
i1_LQ_Mix0_5d_c30877/f1p1/1435	1	223	Chr17	+	10609163	10609950	notsure	15.4	224	1449	Chr03	-	30590131	30592482	MD03G1222000	84.6
i3_LQ_Mix0_5d_c17703/f1p35/3305	1	2151	Chr02	-	6352272	6354632	MD02G1080500	64.6	2152	3327	Chr10	-	23679204	23682125	MD10G1149500	35.3
i2_LQ_Mix0_5d_c62076/f1p11/2253	2	2007	Chr16	-	6156412	6162071	MD16G1089100	88.8	2008	2248	Chr13	-	6232832	6233072	MD13G1089000	10.7
i1_LQ_Mix0_5d_c95999/f1p0/2050	1	658	Chr05	+	36261028	36261686	notsure	31.4	659	2093	Chr00	+	16037254	16045713	MD00G1080100	68.6
i1_LQ_Mix0_5d_c98527/f1p0/1929	18	1651	Chr09	-	11193022	11194657	MD09G1143700	84.7	1652	1929	Chr10	-	10717761	10718041	MD10G1075500	14.4
i2_LQ_Mix0_5d_c115344/f1p35/2304	2	915	Chr15	+	2320616	2344036	notsure	39.7	916	2304	Chr10	+	23015254	23016892	MD10G1143400	60.3
i1_LQ_Mix0_5d_c60291/f1p15/1386	1	594	Chr03	+	2474694	2476478	MD03G1030600	43	595	1382	Chr05	+	44840516	44842190	MD05G1321100	57
i0_LQ_Mix0_5d_c2757/f1p0/960	2	561	Chr07	-	32216035	32219946	MD07G1254900	58.1	562	963	Chr02	+	13252130	13252521	notsure	41.7
i2_LQ_Mix0_5d_c95107/f1p0/2380	1	1920	Chr12	+	7645628	7650385	MD12G1065300	80	1921	2400	Chr13	+	11285911	11287128	MD13G1145100	20
i2_LQ_Mix0_5d_c114568/f1p14/2851	4	885	Chr13	-	26370312	26373629	MD13G1248200	30.8	886	2859	Chr16	-	29343981	29349752	MD16G1255000	69
i1_LQ_Mix0_5d_c59219/f1p0/1500	1	630	Chr03	+	2474664	2476478	MD03G1030600	41.9	631	1503	Chr05	+	44839474	44842192	MD05G1321100	58.1
i2_HQ_Mix0_5d_c70179/f2p20/2039	1	1486	Chr14	-	23623631	23625150	MD14G1143600	72.9	1487	2039	Chr06	-	26980023	26980572	MD06G1127800	27.1
i2_LQ_Mix0_5d_c101115/f1p9/2753	1	2037	Chr09	-	1418053	1624829	MD09G1024000,MD09G1024200,MD09G1024700,MD09G1024600,MD09G1025500,MD09G1024100,MD09G1025100,MD09G1024500,MD09G1025300,MD09G1025800,MD09G1025700,MD09G1023800,MD09G1025200,MD09G1024800,MD09G1024400,MD09G1024300,MD09G1025000,MD09G1025400	74	2038	2745	Chr09	+	2890187	2891499	MD09G1044600	25.7
i2_HQ_Mix0_5d_c108552/f14p0/2647	1	308	Chr00	-	10021802	10022170	MD00G1053600	11.6	309	2636	Chr17	-	14584700	14739528	MD17G1154300,MD17G1154500,MD17G1154400	87.9
i1_LQ_Mix0_5d_c81448/f1p0/1248	1	795	Chr01	+	16733207	16734940	MD01G1064000	64.3	796	1236	Chr01	+	12383535	12386762	notsure	35.7
i2_LQ_Mix0_5d_c37624/f1p11/2438	1	417	Chr15	-	14471605	14472317	MD15G1182600	16.8	418	2487	Chr07	-	30199836	30202973	MD07G1226000	83.2
i2_HQ_Mix0_5d_c12232/f4p6/2701	3	512	Chr05	-	44320517	44321461	MD05G1312500	18.9	513	2703	Chr05	-	46047816	46053511	MD05G1339600	81.1
i0_LQ_Mix0_5d_c6236/f1p6/585	1	453	Chr02	+	9758334	9761575	MD02G1120000	77.2	454	587	Chr01	-	24733180	24733311	notsure	22.8
i2_LQ_Mix0_5d_c61342/f1p0/2912	17	2433	Chr12	+	7645578	7650385	MD12G1065300	82.9	2434	2914	Chr13	+	11285911	11287129	MD13G1145100	16.5
i3_HQ_Mix0_5d_c11949/f3p30/3206	2	2852	Chr10	-	40607246	40611974	MD10G1325700	88.9	2853	3206	Chr05	-	46832331	46832758	MD05G1351300	11
i1_HQ_Mix0_5d_c171416/f8p4/1516	1	1243	Chr13	+	4714258	4717042	MD13G1068700	82	1244	1516	Chr00	-	51058535	51058807	notsure	18
i3_LQ_Mix0_5d_c36723/f1p3/3174	32	2588	Chr05	+	47460214	47462769	MD05G1359600	78.5	2589	3256	Chr17	-	15835562	15836288	notsure	20.5
i2_LQ_Mix0_5d_c113107/f1p7/2697	7	407	Chr08	+	12722977	12723377	notsure	14.6	408	2743	Chr05	+	3507901	3513085	notsure	85.2
i2_LQ_Mix0_5d_c60610/f1p14/2354	1	682	Chr04	-	6085332	6086001	notsure	29	683	2355	Chr00	+	16037254	16045694	MD00G1080100	71
i2_LQ_Mix0_5d_c63486/f1p10/2774	1	1915	Chr09	-	1418139	1624829	MD09G1024000,MD09G1024200,MD09G1024700,MD09G1024600,MD09G1025500,MD09G1024100,MD09G1025100,MD09G1024500,MD09G1025300,MD09G1025800,MD09G1025700,MD09G1025200,MD09G1024800,MD09G1024400,MD09G1024300,MD09G1025000,MD09G1025400	69.1	1916	2773	Chr09	+	2890095	2891529	MD09G1044600	30.9
i2_LQ_Mix0_5d_c83696/f1p2/2810	11	842	Chr05	+	32211832	32212939	MD05G1194600	29.6	843	2807	Chr10	+	27435008	27437167	MD10G1181200	70
i2_LQ_Mix0_5d_c55674/f1p3/2081	1	707	Chr11	-	8246374	8247072	notsure	33.9	708	2084	Chr00	-	4618465	4621721	MD00G1028300	66.1
i2_LQ_Mix0_5d_c131907/f1p7/2785	1	558	Chr03	+	37044307	37045608	MD03G1294100	20	559	2784	Chr00	-	42103473	42107260	MD00G1179500	80
i3_LQ_Mix0_5d_c5671/f1p0/3732	1	431	Chr17	-	13539495	13540834	MD17G1148400	11.5	432	3745	Chr14	+	9717230	9720560	MD14G1082700	88.5
i1_LQ_Mix0_5d_c77042/f1p0/1698	1	325	Chr16	-	626067	626718	MD16G1008300	18.9	326	1717	Chr15	-	7350879	7360202	MD15G1105000,MD15G1104800	81.1
i2_LQ_Mix0_5d_c9748/f1p7/2305	1	1220	Chr14	+	29699541	29892423	MD14G1212800,MD14G1214100,MD14G1215200,MD14G1214800,MD14G1212200,MD14G1214200,MD14G1215100,MD14G1212600,MD14G1212300,MD14G1214300,MD14G1213000,MD14G1211900,MD14G1213400,MD14G1212000,MD14G1212400,MD14G1213800	53.2	1221	2295	Chr06	-	33594511	33595982	MD06G1202800	46.8
i2_HQ_Mix0_5d_c173008/f5p37/2150	3	1867	Chr16	+	19843656	19845514	MD16G1209800	86.7	1868	2150	Chr06	+	7210532	7210813	notsure	13.2
i1_HQ_Mix0_5d_c65194/f2p10/1891	1	552	Chr16	+	38918636	38919190	MD16G1283000	29.2	553	1889	Chr00	-	48263538	48390338	MD00G1202400,MD00G1202600,MD00G1202200,MD00G1202700,MD00G1202300,MD00G1202800	70.8
i0_LQ_Mix0_5d_c2646/f1p3/746	1	188	Chr06	-	23957331	23957518	MD06G1102500	25.3	189	736	Chr09	-	25440944	25441489	notsure	73.7
i3_LQ_Mix0_5d_c20364/f1p13/3799	7	3406	Chr05	-	42679538	42686865	MD05G1294300,MD05G1294400	89.5	3407	3796	Chr10	-	36446685	36447077	MD10G1273000	10.3
i2_LQ_Mix0_5d_c114573/f1p7/2633	1	444	Chr15	+	54272555	54273465	MD15G1442300	16.9	445	2632	Chr08	+	31124888	31131768	MD08G1247600	83.1
i2_LQ_Mix0_5d_c67629/f1p10/2806	1	1753	Chr16	-	23962546	23965747	MD16G1233000,MD16G1232900	62.5	1754	2803	Chr14	-	2702765	3170547	MD14G1032300,MD14G1035300,MD14G1032900,MD14G1035200,MD14G1034500,MD14G1034400,MD14G1034600,MD14G1032800,MD14G1035000,MD14G1033300,MD14G1034700,MD14G1033200,MD14G1034300,MD14G1031900,MD14G1034800,MD14G1034900,MD14G1033400,MD14G1033800,MD14G1031100,MD14G1032600,MD14G1032700,MD14G1034200,MD14G1035500,MD14G1032500,MD14G1034100,MD14G1032200,MD14G1031400,MD14G1033100,MD14G1031200,MD14G1033000	37.4
i5_LQ_Mix0_5d_c2585/f1p0/5107	26	3381	Chr14	+	1700155	1704906	notsure	65.7	3382	5109	Chr04	-	1196080	1199109	MD04G1011000	33.8
i1_LQ_Mix0_5d_c183145/f1p0/1038	1	629	Chr07	-	32216035	32220014	MD07G1254900	60.9	630	1031	Chr02	+	13252130	13252521	notsure	39
i2_LQ_Mix0_5d_c11458/f2p5/2452	1	1264	Chr14	+	29699507	29892423	MD14G1212800,MD14G1214100,MD14G1215200,MD14G1214800,MD14G1212200,MD14G1214200,MD14G1215100,MD14G1212600,MD14G1212300,MD14G1214300,MD14G1213000,MD14G1211900,MD14G1213400,MD14G1212000,MD14G1212400,MD14G1213800	51.8	1265	2439	Chr06	-	33594408	33595982	MD06G1202800	48.2
i1_HQ_Mix0_5d_c23513/f2p3/1514	1	1287	Chr15	-	14814454	14815730	MD15G1188000	84.9	1288	1513	Chr02	-	3925254	3925479	notsure	14.9
i1_LQ_Mix0_5d_c36274/f2p13/1633	1	277	Chr15	+	21161468	21161728	notsure	17.3	278	1598	Chr08	+	26177745	26180903	MD08G1202000	82.7
i2_LQ_Mix0_5d_c52007/f1p15/2259	6	981	Chr17	+	3514549	3545967	MD17G1048400,MD17G1048300	43.1	982	2263	Chr09	+	3156527	3157817	MD09G1048100	56.7
i1_LQ_Mix0_5d_c137178/f1p0/1889	1	822	Chr16	+	38918637	38919459	MD16G1283000	43.5	823	1890	Chr00	-	48263538	48264605	MD00G1202200	56.5
i1_HQ_Mix0_5d_c180980/f2p0/1894	1	825	Chr16	+	38918635	38919459	MD16G1283000	43.6	826	1892	Chr00	-	48263539	48264605	MD00G1202200	56.4
i2_LQ_Mix0_5d_c50273/f1p8/2135	1	1572	Chr06	-	27941704	27945696	MD06G1134900	73.5	1573	2140	Chr10	+	34217972	34218621	MD10G1249600	26.5
i1_LQ_Mix0_5d_c157625/f1p0/1456	1	506	Chr01	+	6318550	6320748	MD01G1012100	34.7	507	1457	Chr00	+	44627414	44628354	notsure	65.3
i1_LQ_Mix0_5d_c21464/f1p0/1776	1	1521	Chr16	-	4132691	4134231	notsure	85.5	1522	1776	Chr02	+	688582	688836	notsure	14.3
i2_LQ_Mix0_5d_c40043/f1p3/2071	5	361	Chr15	+	13621199	13621991	MD15G1175300	17.3	362	2068	Chr08	-	29339072	29340766	notsure	82.5
i1_LQ_Mix0_5d_c159920/f1p0/1300	1	1109	Chr12	-	866861	869146	MD12G1008100	84.7	1110	1309	Chr15	-	14401274	14401474	MD15G1181400	15.3
i3_LQ_Mix0_5d_c17742/f1p30/3120	1	1159	Chr14	-	28264501	28267440	MD14G1191600	36.9	1160	3140	Chr05	+	4306570	4314706	MD05G1027200	63.1
i1_LQ_Mix0_5d_c133928/f1p0/1445	1	593	Chr02	+	8055521	8099178	MD02G1101100,MD02G1101000	41	594	1441	Chr15	+	18173043	18175305	MD15G1223600	58.6
i2_LQ_Mix0_5d_c8131/f1p16/2843	1	2016	Chr05	+	39958744	39963582	MD05G1264400,MD05G1264500	70.9	2017	2843	Chr05	-	36790435	36791261	MD05G1236700	29.1
i0_LQ_Mix0_5d_c2414/f1p8/515	4	459	Chr03	-	31553605	31554060	notsure	88.5	460	515	Chr11	-	36359064	36359119	notsure	10.9
i1_LQ_Mix0_5d_c31339/f1p2/1693	1	1225	Chr00	+	1744013	1748061	MD00G1014000	72	1226	1701	Chr10	-	25506692	25508677	notsure	28
i2_LQ_Mix0_5d_c35601/f1p6/2991	1	2502	Chr09	-	11804263	11807991	MD09G1149900	84.3	2503	2967	Chr11	+	24490434	24490926	notsure	15.7
i2_LQ_Mix0_5d_c81808/f1p9/2385	1	1067	Chr15	+	2311580	2314968	MD15G1033000	44.7	1068	2389	Chr08	+	25430010	25445374	notsure	55.3
i1_LQ_Mix0_5d_c118569/f1p3/2039	3	541	Chr16	+	38914867	38915406	MD16G1283000	26.3	542	2046	Chr12	+	26361938	26363773	MD12G1183500	73.6
i2_LQ_Mix0_5d_c99531/f1p22/2213	1	1284	Chr08	+	27047890	27081858	MD08G1208100,MD08G1208000,MD08G1208300,MD08G1208200	57.9	1285	2218	Chr10	+	23015829	23016890	MD10G1143400	42.1
i4_LQ_Mix0_5d_c12588/f1p6/4074	9	1954	Chr13	-	24880906	24891996	MD13G1240300	47.6	1955	4087	Chr02	+	14556961	14566638	MD02G1169300	52.2
i1_HQ_Mix0_5d_c44708/f2p0/1998	2	1322	Chr09	-	25513819	25515145	notsure	66.1	1323	1999	Chr01	+	5559924	5560587	notsure	33.9
i2_LQ_Mix0_5d_c153272/f1p0/2276	1	2011	Chr06	+	1258837	1261797	MD06G1010800	88	2012	2262	Chr17	+	1443563	1443818	MD17G1018400	11
i1_LQ_Mix0_5d_c39043/f1p0/1177	1	660	Chr03	+	14218936	14219595	MD03G1138500	55.9	661	1180	Chr08	-	21390586	21392017	MD08G1176300	44.1
i0_LQ_Mix0_5d_c7661/f1p15/574	3	314	Chr15	-	13926225	13926680	MD15G1177700	54.2	315	576	Chr14	+	20082126	20082389	MD14G1125900	45.5
i1_LQ_Mix0_5d_c67264/f1p0/1374	1	488	Chr13	+	16491513	16492017	notsure	33	489	1476	Chr10	+	39778894	39781998	notsure	66.8
i1_HQ_Mix0_5d_c8569/f2p4/1796	18	1048	Chr04	+	19794867	19795984	MD04G1112100	57.3	1049	1798	Chr05	-	31232920	31233630	notsure	41.7
i2_LQ_Mix0_5d_c114805/f1p127/2177	1	740	Chr15	-	21739943	21740765	MD15G1256300	33.9	741	2180	Chr17	+	2511303	2513612	MD17G1034800	66
i3_LQ_Mix0_5d_c10495/f1p9/3166	1	2549	Chr00	+	1743976	1748061	MD00G1014000	80.5	2550	3168	Chr10	-	25506690	25508677	notsure	19.5
i2_LQ_Mix0_5d_c22045/f1p5/2438	1	2139	Chr00	-	16049117	16057338	MD00G1080400	87.8	2140	2437	Chr06	+	18216478	18216776	notsure	12.2
i2_LQ_Mix0_5d_c150458/f1p50/1970	1	1769	Chr05	-	42679444	42711121	MD05G1294300,MD05G1294500,MD05G1294400,MD05G1294700,MD05G1294600	89.6	1770	1974	Chr10	-	36446782	36446986	MD10G1273000	10.4
i3_LQ_Mix0_5d_c32055/f1p4/3165	12	440	Chr07	-	23939977	23940492	notsure	13.1	441	3275	Chr02	+	14043267	14048364	MD02G1164400,MD02G1164500	86.6
i2_HQ_Mix0_5d_c30733/f5p15/2372	2	939	Chr07	+	27781123	27783180	MD07G1199400	39.5	940	2368	Chr01	+	24438080	24439505	MD01G1134700	60.2
i3_LQ_Mix0_5d_c21782/f1p19/3281	1	1851	Chr16	-	8342168	8345382	MD16G1117600	56.3	1852	3285	Chr01	+	30818477	30820893	MD01G1214800	43.7
i2_LQ_Mix0_5d_c112314/f1p18/2925	1	1952	Chr04	-	4107649	4115836	MD04G1036900	66.7	1953	2926	Chr13	-	5222615	5223589	MD13G1074100	33.3
i3_LQ_Mix0_5d_c17775/f1p0/3175	1	902	Chr07	-	36092097	36106242	MD07G1303000,MD07G1303100,MD07G1302900	28.4	903	3180	Chr05	-	40729837	40737822	MD05G1272100,MD05G1272200	71.6
i1_HQ_Mix0_5d_c102355/f3p0/1971	8	905	Chr16	+	38918561	38919459	MD16G1283000	45.5	906	1973	Chr00	-	48263538	48264605	MD00G1202200	54.1
i1_LQ_Mix0_5d_c155246/f1p0/1759	1	1237	Chr15	+	2311519	2314968	MD15G1033000	70.6	1238	1751	Chr09	+	36675841	36676355	notsure	29.4
i2_LQ_Mix0_5d_c112460/f1p31/3055	34	2286	Chr17	-	28864359	28868658	MD17G1239400	73.7	2287	3059	Chr09	-	31568291	31569206	MD09G1246500	25.3
i4_LQ_Mix0_5d_c8724/f1p6/4884	1	2507	Chr15	+	17042934	17045440	notsure	50.3	2508	4977	Chr10	-	37214831	37220467	notsure	49.5
i2_LQ_Mix0_5d_c137556/f1p2/2949	1	1857	Chr15	+	2311510	2314803	MD15G1033000	62.9	1858	2952	Chr08	+	25430593	25445377	notsure	37.1
i1_LQ_Mix0_5d_c76265/f1p0/1617	1	745	Chr10	-	3441475	3442337	notsure	45.8	746	1621	Chr11	+	1793180	1794057	notsure	53.9
i1_LQ_Mix0_5d_c21425/f1p0/1554	1	1266	Chr02	+	9176265	9178469	MD02G1113000,MD02G1113100	81.5	1267	1554	Chr06	-	30121124	30121411	notsure	18.5
i3_LQ_Mix0_5d_c28481/f1p0/3951	1	2342	Chr05	+	32917279	32919623	notsure	59.2	2343	3956	Chr08	+	22101846	22104529	MD08G1179400	40.8
i2_LQ_Mix0_5d_c134887/f1p5/2335	1	1226	Chr14	+	29699545	29892423	MD14G1212800,MD14G1214100,MD14G1215200,MD14G1214800,MD14G1212200,MD14G1214200,MD14G1215100,MD14G1212600,MD14G1212300,MD14G1214300,MD14G1213000,MD14G1211900,MD14G1213400,MD14G1212000,MD14G1212400,MD14G1213800	52.3	1227	2345	Chr06	-	33594466	33595982	MD06G1202800	47.7
i3_LQ_Mix0_5d_c9212/f1p0/3620	1	3120	Chr07	-	10965540	10968679	MD07G1099500	86.2	3121	3617	Chr02	+	804442	804937	notsure	13.7
i2_LQ_Mix0_5d_c84055/f1p22/2405	1	348	Chr10	-	1632874	1633221	MD10G1012100	14.5	349	2400	Chr10	+	22233	597938	MD10G1002700,MD10G1001500,MD10G1000600,MD10G1001600,MD10G1001700,MD10G1000800,MD10G1001000	85.5
i2_LQ_Mix0_5d_c10043/f1p1/2166	1	1809	Chr15	-	50621424	50624044	MD15G1405500	83.3	1810	2172	Chr13	-	32578243	32578605	notsure	16.7
i5_LQ_Mix0_5d_c1544/f1p4/5365	36	2635	Chr00	-	29894783	29898390	notsure	47.4	2636	5489	Chr03	+	4740651	4745646	MD03G1058900,MD03G1058800	52
i2_LQ_Mix0_5d_c50810/f1p38/2281	1	1294	Chr11	-	34676380	34677675	notsure	56.1	1295	2305	Chr00	-	38646449	38677727	MD00G1168300,MD00G1168700,MD00G1168200,MD00G1168600,MD00G1168100,MD00G1168500,MD00G1168400	43.9
i1_LQ_Mix0_5d_c173321/f1p10/1894	3	725	Chr16	+	38918637	38919359	MD16G1283000	38.2	726	1893	Chr00	-	48263538	48354116	MD00G1202600,MD00G1202400,MD00G1202300,MD00G1202200	61.7
i2_LQ_Mix0_5d_c13258/f1p10/2033	8	1187	Chr17	+	7996263	8229315	MD17G1096800,MD17G1096300,MD17G1095000,MD17G1096600,MD17G1095100,MD17G1097000,MD17G1096900,MD17G1095900	57.7	1188	2044	Chr14	+	13852324	13862735	notsure	41.9
i2_LQ_Mix0_5d_c7690/f1p9/2966	1	2060	Chr01	-	9004195	9007916	MD01G1022700	69.3	2061	2974	Chr15	+	36319957	36320988	MD15G1329800	30.7
i1_LQ_Mix0_5d_c12054/f1p0/1350	1	955	Chr09	+	1706957	1707996	MD09G1027400	68.3	956	1398	Chr10	+	24834039	24834486	MD10G1158600	31.7
i4_LQ_Mix0_5d_c2698/f1p0/4160	13	3099	Chr12	+	27469006	27474356	MD12G1192800	74.1	3100	4161	Chr04	+	26874626	26876181	MD04G1177400	25.5
i2_LQ_Mix0_5d_c21682/f1p97/2465	1	1345	Chr15	-	316623	320496	MD15G1005200	54.5	1346	2466	Chr01	+	26303185	26304866	MD01G1154700	45.5
i2_LQ_Mix0_5d_c33375/f1p72/2328	24	1193	Chr03	+	23775563	23777665	notsure	50.2	1194	2330	Chr11	-	27247317	27249180	MD11G1192000	48.8
i2_LQ_Mix0_5d_c78531/f1p34/2988	1	2579	Chr11	-	219591	223886	MD11G1002400	86.3	2580	2990	Chr03	-	174322	174739	MD03G1002500	13.7
i2_LQ_Mix0_5d_c67840/f1p0/2728	1	2250	Chr05	+	13562779	13565019	MD05G1070100	82.5	2251	2728	Chr07	+	27061219	27061696	notsure	17.5
i1_LQ_Mix0_5d_c174359/f1p8/1132	1	898	Chr10	-	17574272	17575192	notsure	79.7	899	1127	Chr10	+	15640346	15640577	notsure	20.3
i2_LQ_Mix0_5d_c32033/f1p41/3066	1	1034	Chr07	-	34504642	34507091	MD07G1282000	33.1	1035	3122	Chr11	+	42088758	42122244	MD11G1307000	66.9
i2_HQ_Mix0_5d_c34910/f3p4/2172	1	284	Chr10	+	5393312	5393585	MD10G1041500	13.1	285	2172	Chr05	+	6012325	6015731	MD05G1037700	86.9
i2_HQ_Mix0_5d_c4790/f2p26/2975	1	2593	Chr15	+	1606405	1609722	MD15G1027100	87.2	2594	2974	Chr08	+	2245918	2246298	MD08G1031300	12.8
i0_LQ_Mix0_5d_c10088/f1p12/245	1	213	Chr15	+	25109241	25109452	MD15G1280900	86.2	214	247	Chr10	+	32134011	32134044	notsure	13.8
i2_LQ_Mix0_5d_c82409/f1p25/2334	4	613	Chr17	+	33990418	33990998	MD17G1279400	26	614	2341	Chr09	+	36627939	36631158	MD09G1287200	73.7
i2_LQ_Mix0_5d_c65782/f1p2/2256	1	250	Chr12	-	8260145	8260405	notsure	10.9	251	2284	Chr12	+	7031722	7037074	MD12G1060300,MD12G1060400	89.1
i2_LQ_Mix0_5d_c162435/f1p2/2049	1	481	Chr16	+	23629025	23629652	notsure	23.4	482	2059	Chr15	+	10981491	10984780	MD15G1148400	76.6
i2_LQ_Mix0_5d_c114082/f1p5/2518	1	346	Chr07	+	20211782	20212126	MD07G1139600	13.8	347	2503	Chr01	-	16139894	16143977	MD01G1056200	86.2
i2_LQ_Mix0_5d_c96394/f1p6/2856	1	426	Chr16	+	38918635	38919059	MD16G1283000	15	427	2847	Chr13	+	1595595	1598015	MD13G1022100	85
i2_LQ_Mix0_5d_c112192/f1p8/2711	1	2414	Chr06	+	36529315	36534341	MD06G1234200	89.5	2415	2698	Chr14	+	31976330	31976609	MD14G1240900	10.5
i2_LQ_Mix0_5d_c117757/f1p2/2986	11	2064	Chr15	+	5149881	5151914	MD15G1075500	69.7	2065	2944	Chr15	+	47993270	47994151	notsure	29.9
i1_LQ_Mix0_5d_c62392/f1p0/1850	1	984	Chr15	+	50525393	50526378	notsure	52.5	985	1873	Chr00	-	38646454	38664657	MD00G1168200,MD00G1168300,MD00G1168100,MD00G1168400	47.4
i2_HQ_Mix0_5d_c34996/f7p24/2418	1	646	Chr06	+	31393895	31394521	MD06G1173800	26.7	647	2418	Chr14	+	27298447	27300509	MD14G1180300	73.3
i1_LQ_Mix0_5d_c116773/f1p2/1352	1	413	Chr05	-	21708501	21709053	MD05G1104200	29.9	414	1378	Chr05	+	5754329	5755588	MD05G1035800	69.9
i2_HQ_Mix0_5d_c144189/f2p3/2079	1	1099	Chr11	-	42990629	42994143	MD11G1318000	52.8	1100	2080	Chr12	+	27937292	27939122	MD12G1198300	47.2
i1_LQ_Mix0_5d_c137442/f1p17/1888	1	824	Chr16	+	38918635	38919459	MD16G1283000	43.6	825	1889	Chr00	-	48263540	48264605	MD00G1202200	56.4
i2_HQ_Mix0_5d_c2579/f12p27/2422	1	351	Chr13	+	12502322	12502680	MD13G1158900	14.5	352	2422	Chr16	+	12849060	12852786	MD16G1159100	85.5
i0_LQ_Mix0_5d_c4798/f1p4/422	1	272	Chr06	+	24580394	24581922	MD06G1106700	65.1	273	416	Chr12	-	32955439	32955572	MD12G1262900	34.4
i2_LQ_Mix0_5d_c51467/f1p12/3334	1	2284	Chr16	-	23962546	23971431	MD16G1233000,MD16G1232900	68.4	2285	3334	Chr14	-	2702765	3170547	MD14G1032300,MD14G1035300,MD14G1032900,MD14G1035200,MD14G1034500,MD14G1034400,MD14G1034600,MD14G1032800,MD14G1035000,MD14G1033300,MD14G1034700,MD14G1033200,MD14G1034300,MD14G1031900,MD14G1034800,MD14G1034900,MD14G1033400,MD14G1033800,MD14G1031100,MD14G1032600,MD14G1032700,MD14G1034200,MD14G1035500,MD14G1032500,MD14G1034100,MD14G1032200,MD14G1031400,MD14G1033100,MD14G1031200,MD14G1033000	31.4
i2_LQ_Mix0_5d_c46355/f1p9/2713	1	2349	Chr02	-	25354879	25361347	MD02G1218200	86.5	2350	2715	Chr07	+	10904691	10905056	MD07G1098900	13.5
i2_LQ_Mix0_5d_c179035/f1p18/2009	2	1177	Chr16	-	1276616	1277790	notsure	58.4	1178	2013	Chr02	-	20932572	20933570	notsure	41.5
i3_LQ_Mix0_5d_c10712/f1p10/3899	1	3319	Chr15	-	38984749	38988079	notsure	85.2	3320	3896	Chr02	-	6155629	6156190	notsure	14.8
i1_LQ_Mix0_5d_c96451/f1p1/1957	1	1162	Chr09	-	1418053	1624083	MD09G1024000,MD09G1024200,MD09G1024700,MD09G1024600,MD09G1025500,MD09G1024100,MD09G1025100,MD09G1024500,MD09G1025300,MD09G1025800,MD09G1025700,MD09G1023800,MD09G1025200,MD09G1024800,MD09G1024400,MD09G1024300,MD09G1025000,MD09G1025400	59.2	1163	1964	Chr09	+	2890187	2891593	MD09G1044600	40.8
i2_LQ_Mix0_5d_c4485/f1p45/2519	2	1380	Chr16	-	21355857	21357234	notsure	54.7	1381	2521	Chr09	-	31837623	31839418	MD09G1249000	45.3
i3_LQ_Mix0_5d_c4842/f1p1/3397	1	535	Chr14	+	870531	871036	notsure	15.7	536	3401	Chr14	+	32157503	32164180	MD14G1243200	84.2
i3_LQ_Mix0_5d_c8050/f1p2/3292	1	2047	Chr04	-	337282	339716	MD04G1002400	62	2048	3268	Chr15	+	45441686	45442901	notsure	37
i1_LQ_Mix0_5d_c62576/f1p7/1351	1	185	Chr02	+	3622888	3623067	MD02G1044400	13.7	186	1353	Chr02	-	3160734	3199992	MD02G1039400,MD02G1038800,MD02G1038900	86.3
i2_LQ_Mix0_5d_c12750/f1p92/3047	1	1318	Chr13	+	21169553	21170873	MD13G1219100	43.2	1319	3049	Chr10	-	6150691	6154766	MD10G1046000	56.8
i2_LQ_Mix0_5d_c13212/f1p9/2076	1	1439	Chr00	+	46491363	46492800	notsure	69.3	1440	2076	Chr05	-	28340970	28341789	MD05G1152600	30.7
i2_LQ_Mix0_5d_c48279/f1p6/3027	1	2160	Chr15	-	2838809	2844452	MD15G1040300,MD15G1040200,MD15G1040400	71.1	2161	3021	Chr08	+	4460075	4461532	MD08G1057200	28.4
i2_LQ_Mix0_5d_c67238/f1p5/2457	1	277	Chr15	+	11576260	11576548	MD15G1155700	11.2	278	2463	Chr02	+	698974	702445	MD02G1010800	88.8
i2_LQ_Mix0_5d_c143976/f1p20/2077	1	1626	Chr09	-	11049290	11071887	MD09G1141500,MD09G1141400,MD09G1141300,MD09G1141700,MD09G1141200,MD09G1141600	77.8	1627	2090	Chr08	-	2351305	2351769	notsure	22.2
i2_LQ_Mix0_5d_c49003/f1p1/2391	1	2118	Chr08	+	27299296	27302565	notsure	88.2	2119	2399	Chr07	-	26831280	26831572	MD07G1187700	11.7
i2_LQ_Mix0_5d_c65861/f1p14/2990	1	566	Chr02	-	2012678	2014699	MD02G1026500	19	567	2978	Chr15	-	12880465	12882877	MD15G1167900	81
i2_LQ_Mix0_5d_c119027/f1p71/3049	24	1226	Chr15	+	5343693	5345361	notsure	39.5	1227	3039	Chr08	-	7808522	8012626	MD08G1093900,MD08G1094600,MD08G1095200,MD08G1094100,MD08G1094500,MD08G1094400,MD08G1095500,MD08G1094300,MD08G1094800	59.5
i1_LQ_Mix0_5d_c34629/f1p0/1858	1	631	Chr10	+	39893983	39895317	MD10G1314900	34	632	1858	Chr05	+	46186292	46187519	MD05G1341400	66
i2_LQ_Mix0_5d_c47812/f1p9/2201	1	672	Chr05	+	36261028	36261686	notsure	30.5	673	2203	Chr00	+	16037254	16045700	MD00G1080100	69.5
i1_LQ_Mix0_5d_c20808/f1p14/1643	1	874	Chr14	+	27300507	27301390	MD14G1180300	53.1	875	1645	Chr00	+	29840317	29844228	MD00G1137800	46.9
i2_HQ_Mix0_5d_c11867/f5p23/2683	28	1986	Chr05	+	26501176	26523567	MD05G1136900,MD05G1137000	72.9	1987	2686	Chr05	+	26370074	26370772	MD05G1135500	26.1
i1_HQ_Mix0_5d_c17102/f2p0/1656	1	241	Chr02	+	30739041	30739281	notsure	14.5	242	1659	Chr02	+	36604858	36606273	notsure	85.5
i2_LQ_Mix0_5d_c155238/f1p7/2776	7	571	Chr03	+	37044294	37045608	MD03G1294100	20.3	572	2779	Chr00	-	42103491	42107260	MD00G1179500	79.5
i2_LQ_Mix0_5d_c51946/f1p51/2663	1	1440	Chr02	+	9052664	9054178	MD02G1111500	54	1441	2668	Chr10	-	8832202	8833429	notsure	46
i2_LQ_Mix0_5d_c36789/f1p16/3035	2	2677	Chr15	+	43338336	43341012	MD15G1359300	88.4	2678	3020	Chr00	-	21884376	21884718	MD00G1104000	11.3
i1_LQ_Mix0_5d_c97875/f1p0/1453	4	812	Chr15	-	11279754	11281804	MD15G1152300	54.5	813	1475	Chr00	-	23677194	23677861	MD00G1112500	44.7
i1_LQ_Mix0_5d_c65580/f1p0/1523	7	304	Chr05	-	12775369	12785915	notsure	19.5	305	1523	Chr14	-	31979918	32000650	MD14G1241100	79.8
i1_HQ_Mix0_5d_c60666/f2p6/1847	4	302	Chr06	-	22946371	22946663	MD06G1095700	16.2	303	1847	Chr14	-	18817069	18818603	MD14G1115700	83.6
i1_HQ_Mix0_5d_c4776/f4p91/1500	1	251	Chr15	+	21161491	21161728	notsure	16.8	252	1492	Chr08	+	26177745	26180848	MD08G1202000	83.2
i1_HQ_Mix0_5d_c119860/f2p0/1298	6	534	Chr00	+	1416851	1417377	MD00G1011700	40.4	535	1310	Chr15	-	25514046	25566974	MD15G1282500,MD15G1282700,MD15G1282600	59.2
i1_LQ_Mix0_5d_c32071/f1p4/1758	11	401	Chr15	-	42190794	42191196	notsure	22.2	402	1764	Chr14	-	29322741	29324102	MD14G1205900	77.3
i1_LQ_Mix0_5d_c13367/f1p0/1078	1	948	Chr10	-	25512995	25513979	MD10G1164100	87.9	949	1077	Chr01	+	23122794	23122922	notsure	12
i3_LQ_Mix0_5d_c23485/f1p11/3957	1	410	Chr16	+	11414447	11414851	MD16G1146200	10.4	411	3960	Chr05	-	44770699	44775265	MD05G1320400,MD05G1320300	89.6
i2_HQ_Mix0_5d_c11701/f3p0/2486	1	2199	Chr08	+	27298972	27302565	notsure	88.4	2200	2487	Chr07	-	26831273	26831572	MD07G1187700	11.6
i1_LQ_Mix0_5d_c60220/f1p0/1842	1	656	Chr14	+	8652868	8654159	notsure	35.6	657	1844	Chr09	+	17458389	17461639	MD09G1194300	64.4
i1_LQ_Mix0_5d_c168215/f1p0/1088	1	716	Chr17	+	25079502	25080402	MD17G1207900	65.6	717	1091	Chr16	-	8938641	8939019	notsure	34.4
i4_LQ_Mix0_5d_c13146/f1p0/4067	3	2312	Chr15	+	9225596	9822818	MD15G1130100,MD15G1132800,MD15G1131200,MD15G1134500,MD15G1132700,MD15G1128300,MD15G1128200,MD15G1129500,MD15G1128100,MD15G1133200,MD15G1134300,MD15G1128000,MD15G1128900,MD15G1134000,MD15G1131500,MD15G1134100,MD15G1130900,MD15G1129800,MD15G1132500,MD15G1130700,MD15G1129900,MD15G1134800,MD15G1131600,MD15G1127400,MD15G1127500,MD15G1127200,MD15G1134600,MD15G1131900,MD15G1134700,MD15G1133600,MD15G1132…	54.9	2313	4208	Chr08	+	17421210	17423116	MD08G1156500	45.1
i2_LQ_Mix0_5d_c155281/f1p7/2678	1	2061	Chr03	-	29747428	29751240	MD03G1216600	76.6	2062	2690	Chr11	+	3888484	3889113	MD11G1044000	23.4
i1_LQ_Mix0_5d_c126013/f1p4/1095	7	215	Chr02	+	2634051	2634260	notsure	19	216	1101	Chr13	-	12527749	12529859	MD13G1159200	80.5
i2_LQ_Mix0_5d_c135612/f1p33/2249	2	806	Chr16	-	21759629	21761781	MD16G1219000	35.8	807	2248	Chr05	+	32961118	32962559	notsure	64.1
i2_LQ_Mix0_5d_c101235/f1p1/2567	1	2181	Chr12	-	10287554	10298836	MD12G1084200,MD12G1084300	84.8	2182	2571	Chr03	-	3139174	3140029	MD03G1039600	15.2
i1_LQ_Mix0_5d_c76816/f1p14/2012	1	1309	Chr17	-	32836853	32839963	MD17G1268700	65	1310	2011	Chr03	-	36597586	36598513	MD03G1286600	34.9
i1_LQ_Mix0_5d_c154949/f1p11/1661	1	943	Chr17	-	9364204	9365146	MD17G1109300	56.7	944	1662	Chr09	-	9062328	9063032	notsure	43.3
i2_HQ_Mix0_5d_c130548/f2p110/2779	1	1029	Chr13	+	21169055	21170873	MD13G1219100	37	1030	2779	Chr10	-	6150672	6154766	MD10G1046000	63
i2_LQ_Mix0_5d_c129942/f2p3/2464	1	247	Chr12	-	3803860	3804109	notsure	10	248	2473	Chr16	-	24939752	24952349	MD16G1237000	90
i2_LQ_Mix0_5d_c22101/f3p14/2575	2	1378	Chr10	-	14836393	14838884	MD10G1094900	53.4	1379	2578	Chr12	+	31832561	31833762	notsure	46.5
i1_LQ_Mix0_5d_c116122/f1p0/1931	4	976	Chr11	+	31832408	31834900	MD11G1218500	50.3	977	1928	Chr16	+	40709697	40710654	notsure	49.2
i4_HQ_Mix0_5d_c13972/f2p0/4215	1	648	Chr16	+	11411991	11414851	MD16G1146200	15.3	649	4230	Chr05	-	44770663	44775265	MD05G1320400,MD05G1320300	84.7
i3_LQ_Mix0_5d_c5565/f1p0/3311	1	2166	Chr08	+	19728381	19731429	MD08G1166200,MD08G1166300	65.3	2167	3315	Chr12	+	31832558	31833708	notsure	34.7
i4_LQ_Mix0_5d_c13428/f1p0/4181	1	3140	Chr16	-	23962546	23971435	MD16G1233000,MD16G1232900	74.9	3141	4190	Chr14	-	2702765	3170547	MD14G1032300,MD14G1035300,MD14G1032900,MD14G1035200,MD14G1034500,MD14G1034400,MD14G1034600,MD14G1032800,MD14G1035000,MD14G1033300,MD14G1034700,MD14G1033200,MD14G1034300,MD14G1031900,MD14G1034800,MD14G1034900,MD14G1033400,MD14G1033800,MD14G1031100,MD14G1032600,MD14G1032700,MD14G1034200,MD14G1035500,MD14G1032500,MD14G1034100,MD14G1032200,MD14G1031400,MD14G1033100,MD14G1031200,MD14G1033000	25
i1_LQ_Mix0_5d_c156808/f1p0/1813	1	1505	Chr11	-	24048995	24051329	notsure	82.1	1506	1832	Chr16	+	25107487	25107809	notsure	17.8
i2_LQ_Mix0_5d_c66523/f1p17/2323	1	1875	Chr15	+	2311519	2314803	MD15G1033000	80.7	1876	2324	Chr08	+	25430593	25431263	notsure	19.3
i2_LQ_Mix0_5d_c97911/f1p0/2491	5	737	Chr07	-	538737	540218	MD07G1005000	29.4	738	2494	Chr02	+	37136533	37141012	MD02G1316900	70.4
i2_LQ_Mix0_5d_c35205/f1p6/2487	1	1924	Chr15	+	2311519	2314803	MD15G1033000	77.3	1925	2490	Chr08	+	25430593	25431266	notsure	22.7
i0_LQ_Mix0_5d_c4153/f1p19/757	1	594	Chr11	-	7953814	7971585	MD11G1095700,MD11G1095500,MD11G1095400,MD11G1095900	77.1	595	767	Chr03	-	7083151	7083324	MD03G1086800	22.5
i5_LQ_Mix0_5d_c1665/f1p11/5348	1	3704	Chr15	+	54265572	54324010	MD15G1442900,MD15G1442500,MD15G1442600,MD15G1443100,MD15G1442700,MD15G1442800,MD15G1442300,MD15G1442200	69	3705	5350	Chr08	+	31125831	31131730	MD08G1247600	30.7
i2_HQ_Mix0_5d_c140236/f7p79/2734	1	2350	Chr11	+	38348830	38452761	MD11G1268600,MD11G1267900,MD11G1268200,MD11G1268300,MD11G1268400,MD11G1268500,MD11G1268100	86	2351	2727	Chr16	-	24199913	24201153	notsure	13.8
i2_LQ_Mix0_5d_c117803/f1p9/2395	1	612	Chr00	-	2248497	2249115	MD00G1015700	25.3	613	2410	Chr15	+	27576423	27579593	MD15G1294800	74.4
i1_LQ_Mix0_5d_c13586/f1p5/1129	1	180	Chr03	+	4104148	4104327	notsure	15.9	181	1130	Chr10	-	40032733	40072090	MD10G1317400,MD10G1317600,MD10G1317000	84.1
i1_LQ_Mix0_5d_c104681/f1p0/1184	1	717	Chr10	-	41451791	41454686	MD10G1338300	60.5	718	1186	Chr07	+	29496516	29497004	notsure	39.5
i1_HQ_Mix0_5d_c30774/f5p5/1300	1	1070	Chr16	-	12079089	12080618	MD16G1152800	82.2	1071	1301	Chr09	+	17645083	17645319	notsure	17.8
i2_LQ_Mix0_5d_c99219/f1p9/2185	1	1853	Chr09	+	984955	989335	MD09G1016000	84.2	1854	2202	Chr09	-	3090952	3091300	MD09G1047100	15.8
i2_LQ_Mix0_5d_c19871/f1p9/2350	1	1275	Chr05	+	12529317	12536587	MD05G1066500	54.1	1276	2348	Chr10	+	10887189	10889885	MD10G1076500	45.5
i2_LQ_Mix0_5d_c132164/f1p22/2570	4	470	Chr16	+	30216981	30217896	MD16G1257600	18.2	471	2563	Chr10	-	11666939	11671315	MD10G1079900	81.6
i2_LQ_Mix0_5d_c65348/f1p13/2376	1	696	Chr05	+	36261005	36261686	notsure	29.4	697	2371	Chr00	+	16037254	16045699	MD00G1080100	70.6
i2_LQ_Mix0_5d_c77879/f1p8/2455	3	2201	Chr13	-	6602167	6838024	MD13G1094400,MD13G1096500,MD13G1093700,MD13G1094700,MD13G1094300,MD13G1096400,MD13G1096000,MD13G1094600,MD13G1095000,MD13G1094200,MD13G1095700,MD13G1093800,MD13G1096200,MD13G1094100,MD13G1095400,MD13G1096600,MD13G1093900,MD13G1094000	89.4	2202	2461	Chr16	-	6808780	6809039	MD16G1097600	10.6
i1_LQ_Mix0_5d_c118031/f1p0/1892	1	799	Chr16	+	38918635	38919435	MD16G1283000	42.3	800	1891	Chr00	-	48263538	48296237	MD00G1202200	57.7
i2_LQ_Mix0_5d_c134809/f1p4/2971	2	298	Chr10	+	29417581	29417876	MD10G1195900	10	299	2981	Chr05	+	34113304	34121194	MD05G1209600	90
i2_LQ_Mix0_5d_c52562/f1p13/2260	1	1694	Chr15	+	2311520	2314803	MD15G1033000	75	1695	2260	Chr08	+	25430593	25432128	notsure	25
i4_LQ_Mix0_5d_c12197/f1p1/4426	1	4041	Chr16	+	8700896	8706758	MD16G1120900	88.7	4042	4558	Chr13	+	8889229	8889746	MD13G1120900	11.3
i1_LQ_Mix0_5d_c178349/f1p0/1585	1	367	Chr10	+	39893983	39895057	MD10G1314900	23	368	1592	Chr05	+	46186260	46187511	MD05G1341400	76.9
i1_LQ_Mix0_5d_c99478/f1p0/1818	1	949	Chr03	+	2474693	2476478	MD03G1030600	52.1	950	1822	Chr05	+	44839474	44842191	MD05G1321100	47.9
i1_LQ_Mix0_5d_c51489/f1p22/1472	1	713	Chr05	-	38381159	38382866	MD05G1252200	47.6	714	1499	Chr15	+	25205697	25207149	MD15G1281700	52.4
i3_LQ_Mix0_5d_c31282/f1p29/3129	1	562	Chr00	-	8721466	8722126	MD00G1046400	17.8	563	3149	Chr00	+	3911444	3982540	MD00G1024300,MD00G1024000,MD00G1023300,MD00G1024100,MD00G1023600,MD00G1023500,MD00G1024200	82.2
i2_LQ_Mix0_5d_c130494/f1p14/2466	6	733	Chr05	+	36260972	36261686	notsure	29.4	734	2476	Chr00	+	16037254	16045713	MD00G1080100	70.4
i2_LQ_Mix0_5d_c79725/f1p6/2137	1	632	Chr09	+	17153597	17154238	MD09G1192300	29.5	633	2140	Chr04	+	3744219	3749598	MD04G1033000	70.4
i4_LQ_Mix0_5d_c13527/f1p6/4060	1	3089	Chr01	-	26412320	26415406	MD01G1156600	76	3090	4065	Chr04	-	26041182	26042159	notsure	24
i3_LQ_Mix0_5d_c23908/f1p0/3606	20	670	Chr05	+	31960756	31962751	MD05G1190500	18	671	3614	Chr04	-	3828305	3832305	MD04G1034200	81.5
i2_LQ_Mix0_5d_c26061/f1p21/1581	1	326	Chr08	-	11467353	11467679	notsure	20.6	327	1582	Chr05	+	2357689	2359655	MD05G1011400	79.4
i3_HQ_Mix0_5d_c2123/f3p6/3678	1	2280	Chr06	+	34628056	34630336	MD06G1213500	62	2281	3678	Chr02	-	35599544	35602998	notsure	38
i2_LQ_Mix0_5d_c99548/f1p3/2198	1	1797	Chr04	-	418483	420849	MD04G1002900	81.7	1798	2199	Chr13	+	43133547	43148911	MD13G1285000	18.3
i2_LQ_Mix0_5d_c115717/f1p85/2946	1	2572	Chr11	-	219591	223886	MD11G1002400	87.3	2573	2945	Chr03	-	174360	174739	MD03G1002500	12.7
i0_LQ_Mix0_5d_c8874/f1p0/557	1	289	Chr00	-	50796504	50798102	MD00G1208400	51.2	290	564	Chr05	-	47947522	47947915	MD05G1364600	48.8
i1_LQ_Mix0_5d_c23154/f1p3/1816	7	474	Chr10	-	9502281	9509148	notsure	24.7	475	1894	Chr17	+	19410168	19413432	MD17G1174500	75
i1_LQ_Mix0_5d_c119803/f1p0/1821	1	1203	Chr16	+	21424171	21427041	MD16G1217200	66	1204	1823	Chr11	+	31138610	31139402	notsure	34
i0_HQ_Mix0_5d_c9129/f3p24/332	1	237	Chr17	-	11617235	11617471	notsure	71	238	334	Chr04	-	30057966	30058069	MD04G1218000	29
i2_LQ_Mix0_5d_c100742/f1p64/3168	30	365	Chr16	-	2839480	2839814	notsure	10.6	366	3170	Chr10	-	30097230	30100395	MD10G1203300	88.5
i1_LQ_Mix0_5d_c45457/f1p4/1579	1	1413	Chr03	-	9218023	9264995	MD03G1107300,MD03G1107700,MD03G1107500	88.9	1414	1589	Chr03	-	15089602	15089783	notsure	11.1
i2_HQ_Mix0_5d_c99119/f3p34/2210	1	1785	Chr07	-	1670810	1957631	MD07G1020000,MD07G1020300,MD07G1021100,MD07G1021800,MD07G1020800,MD07G1019900,MD07G1021600,MD07G1019800,MD07G1022300,MD07G1023500,MD07G1020500,MD07G1023700,MD07G1020400,MD07G1020700,MD07G1021400,MD07G1020600,MD07G1021500,MD07G1022000,MD07G1019600,MD07G1020100,MD07G1022800,MD07G1023000,MD07G1020900,MD07G1022700,MD07G1022600,MD07G1021200	80.7	1786	2211	Chr07	+	1464987	1510408	MD07G1017000,MD07G1017100,MD07G1017200,MD07G1017300,MD07G1017400	19.3
i3_LQ_Mix0_5d_c17087/f1p12/3695	1	2902	Chr09	-	1418053	1624535	MD09G1024000,MD09G1024200,MD09G1024700,MD09G1024600,MD09G1025500,MD09G1024100,MD09G1025100,MD09G1024500,MD09G1025300,MD09G1025800,MD09G1025700,MD09G1023800,MD09G1025200,MD09G1024800,MD09G1024400,MD09G1024300,MD09G1025000,MD09G1025400	78.2	2903	3712	Chr09	+	2890187	2891635	MD09G1044600	21.8
i1_LQ_Mix0_5d_c121232/f4p0/1935	1	877	Chr16	+	38918580	38919459	MD16G1283000	45.2	878	1931	Chr00	-	48263551	48264605	MD00G1202200	54.3
i2_LQ_Mix0_5d_c113448/f1p3/2575	1	762	Chr09	-	6689925	6690725	notsure	29.4	763	2590	Chr04	+	26524609	26528288	MD04G1173700	70.6
i2_LQ_Mix0_5d_c50707/f1p6/2605	3	2276	Chr15	+	431799	435629	MD15G1008200	87.3	2277	2604	Chr08	+	693549	693885	MD08G1009300	12.6
i2_LQ_Mix0_5d_c118434/f1p2/3006	1	821	Chr10	-	29806825	29808107	MD10G1199900	27.3	822	3012	Chr05	-	35755418	35763608	MD05G1225000	72.7
i4_LQ_Mix0_5d_c3610/f1p4/4173	1	509	Chr02	+	31710152	31711819	MD02G1262600	11.5	510	4427	Chr10	-	832124	836038	notsure	88.4
i2_HQ_Mix0_5d_c114439/f3p8/2991	1	370	Chr03	+	33836476	33836845	MD03G1250300	12.4	371	2988	Chr11	+	38604139	38611088	MD11G1270400	87.6
i3_LQ_Mix0_5d_c20773/f1p15/3414	1	2135	Chr10	+	39256749	39267152	MD10G1307100,MD10G1307200	62.4	2136	3412	Chr00	+	40665950	40670430	MD00G1175400	37.4
i4_LQ_Mix0_5d_c7509/f1p0/4640	1	697	Chr09	+	984954	985774	MD09G1016000	14.7	698	4733	Chr05	-	33100530	33138931	MD05G1202200,MD05G1202300,MD05G1202500	85.3
i2_LQ_Mix0_5d_c22365/f1p1/2614	1	614	Chr05	-	30856963	30857802	notsure	23.4	615	2621	Chr10	-	10855588	10857768	MD10G1076100	76.6
i2_LQ_Mix0_5d_c38737/f1p0/2701	1	1116	Chr08	-	3657305	3658865	MD08G1047900	41.2	1117	2708	Chr14	+	32150226	32152147	notsure	58.8
i2_LQ_Mix0_5d_c179523/f1p6/2060	1	344	Chr06	+	36529268	36530606	MD06G1234200	16.6	345	2067	Chr14	+	31972350	31976466	MD14G1240900	83.4
i2_LQ_Mix0_5d_c33153/f1p4/2972	19	2214	Chr13	-	7729022	7731379	MD13G1107800	74	2215	2969	Chr16	-	7543027	7543781	MD16G1107700	25.4
i2_LQ_Mix0_5d_c10576/f1p5/2688	4	709	Chr01	-	12089808	12092285	MD01G1035900	26.2	710	2690	Chr16	+	6910303	6914262	MD16G1099100	73.6
i2_LQ_Mix0_5d_c136241/f1p26/2711	15	1035	Chr16	+	26802735	26822468	notsure	37.7	1036	2708	Chr16	-	27161164	27163456	MD16G1246100	61.8
i2_LQ_Mix0_5d_c112717/f1p50/2736	2	832	Chr16	+	25272375	25277271	MD16G1239000	30.3	833	2741	Chr11	+	36741916	36819917	MD11G1254800,MD11G1255300	69.6
i2_LQ_Mix0_5d_c32996/f1p25/2682	1	2444	Chr07	+	32604730	32609115	MD07G1259900	88.7	2445	2743	Chr01	+	28622220	28641218	MD01G1188000,MD01G1187800,MD01G1187900	10.9
i1_LQ_Mix0_5d_c66946/f1p0/1961	13	1671	Chr16	+	19842519	19845514	MD16G1209800	84.9	1672	1954	Chr06	+	7210532	7210813	notsure	14.5
i3_LQ_Mix0_5d_c27018/f2p0/3182	1	2400	Chr17	-	28864359	28868686	MD17G1239400	75.3	2401	3182	Chr09	-	31568283	31569206	MD09G1246500	24.5
i2_LQ_Mix0_5d_c50535/f1p2/2696	9	1952	Chr15	-	47792585	47794928	MD15G1386600	72.1	1953	2698	Chr00	+	16096950	16097689	MD00G1080700	27.7
i1_LQ_Mix0_5d_c8175/f1p0/1746	1	1523	Chr02	-	1345493	1348356	MD02G1018200	85.7	1524	1778	Chr12	+	20477420	20477675	notsure	14.3
i1_LQ_Mix0_5d_c23358/f1p5/1360	1	1061	Chr15	-	5032247	5033307	MD15G1073600	78	1062	1360	Chr13	-	35965780	35966078	notsure	22
i3_LQ_Mix0_5d_c23103/f1p2/3381	25	2705	Chr12	+	1159549	1171643	notsure	79.2	2706	3383	Chr05	+	44187812	44188937	MD05G1311800	20
i3_LQ_Mix0_5d_c7765/f1p4/3403	1	2865	Chr02	-	26216061	26231643	MD02G1223800,MD02G1223900	84.3	2866	3400	Chr13	-	10639501	10641073	MD13G1138300	15.7
i1_LQ_Mix0_5d_c39843/f1p0/1074	4	388	Chr11	+	32577664	32578051	MD11G1222500	35.6	389	1081	Chr03	+	28738036	28739958	MD03G1208300	64.1
i0_LQ_Mix0_5d_c2197/f1p5/586	2	182	Chr06	-	6913523	6913703	notsure	31.1	183	580	Chr06	+	2466271	2466715	notsure	68.4
i0_HQ_Mix0_5d_c1985/f2p0/1002	1	720	Chr16	+	19844782	19845514	MD16G1209800	71.8	721	1003	Chr06	+	7210532	7210813	notsure	28.2
i2_LQ_Mix0_5d_c106789/f1p22/1910	2	1684	Chr10	-	17574272	17575974	notsure	87.9	1685	1914	Chr10	+	15640346	15640576	notsure	12
i2_LQ_Mix0_5d_c95059/f1p54/2664	1	306	Chr00	-	10021802	10022170	MD00G1053600	11.5	307	2666	Chr17	-	14584672	14739528	MD17G1154300,MD17G1154500,MD17G1154400	88.5
i2_LQ_Mix0_5d_c40532/f1p105/2083	1	619	Chr10	+	8832240	8832858	notsure	29.7	620	2084	Chr04	-	20669568	20671501	MD04G1120500	70.3
i1_LQ_Mix0_5d_c50385/f1p0/2057	1	1001	Chr16	+	38918453	38919459	MD16G1283000	48.5	1002	2065	Chr00	-	48263538	48264605	MD00G1202200	51.5
i2_LQ_Mix0_5d_c105928/f1p3/2681	1	403	Chr07	-	32097061	32097446	MD07G1253700	15	404	2664	Chr01	-	28128156	28132019	MD01G1182800	84.1
i2_LQ_Mix0_5d_c17289/f1p57/2785	1	1680	Chr10	+	38683744	38685424	MD10G1299400	60.3	1681	2784	Chr02	-	4949470	4950781	MD02G1061700	39.7
i3_LQ_Mix0_5d_c31151/f1p10/3343	1	2959	Chr11	+	38289507	38452761	MD11G1268600,MD11G1267600,MD11G1268200,MD11G1267900,MD11G1268300,MD11G1268400,MD11G1267800,MD11G1268500,MD11G1268100,MD11G1267700	88.5	2960	3336	Chr16	-	24199913	24201153	notsure	11.3
i1_LQ_Mix0_5d_c3390/f1p0/1624	1	673	Chr15	+	19759319	19761217	MD15G1240100	41.4	674	1625	Chr00	-	8779359	8781299	MD00G1047200	58.6
i0_LQ_Mix0_5d_c4598/f1p2/742	3	545	Chr16	+	12988774	12989322	MD16G1160100	73.3	546	741	Chr13	-	12623999	12624193	notsure	26.5
i1_HQ_Mix0_5d_c60863/f2p0/1493	1	1106	Chr00	+	20513034	20519209	MD00G1098500	74.1	1107	1493	Chr04	+	30569580	30569966	notsure	25.9
i2_LQ_Mix0_5d_c113088/f1p360/2272	1	1101	Chr04	-	6196087	6197899	MD04G1052600	48.1	1102	2290	Chr17	-	27464611	27496465	MD17G1226500,MD17G1226600	51.9
i2_LQ_Mix0_5d_c136235/f1p13/2932	1	2214	Chr09	-	86190	91478	MD09G1000400	75.6	2215	2927	Chr03	+	25299050	25300284	notsure	24.4
i3_LQ_Mix0_5d_c19406/f1p15/3083	1	1408	Chr02	-	26215737	26231589	MD02G1223800,MD02G1223900	45.6	1409	3089	Chr13	-	10639501	10651992	MD13G1138400,MD13G1138300	54.4
i2_LQ_Mix0_5d_c118524/f1p12/2271	1	1112	Chr17	+	28105060	28107358	MD17G1232800	48.9	1113	2272	Chr14	-	29916064	29917226	notsure	51.1
i2_LQ_Mix0_5d_c46662/f1p45/2734	2	634	Chr00	-	36865225	36865974	MD00G1163600	23.1	635	2740	Chr17	-	14584677	14598277	MD17G1154300	76.9
i2_LQ_Mix0_5d_c16857/f1p9/2494	1	838	Chr14	-	20533998	20534894	MD14G1128500	34.1	839	2460	Chr09	+	34344742	34356443	MD09G1269200	65.9
i1_HQ_Mix0_5d_c24402/f2p0/1294	5	999	Chr13	+	15809813	15811059	MD13G1185700	76.7	1000	1297	Chr16	+	16105058	16105355	notsure	23
i3_LQ_Mix0_5d_c19919/f1p1/3296	1	2192	Chr16	+	38917257	38919453	MD16G1283000	66.9	2193	3277	Chr00	-	48263538	48264611	MD00G1202200	33.1
i2_LQ_Mix0_5d_c46629/f1p5/2220	2	1648	Chr02	+	31819746	31821687	MD02G1264200	74	1649	2223	Chr05	+	16928346	16929547	notsure	25.8
i1_HQ_Mix0_5d_c49907/f2p1/1921	3	1638	Chr16	+	19843869	19845514	MD16G1209800	85.2	1639	1921	Chr06	+	7210532	7210813	notsure	14.7
i3_LQ_Mix0_5d_c21890/f1p2/3419	2	2255	Chr16	+	38917139	38919396	MD16G1283000	66.4	2256	3395	Chr17	-	20007961	20009057	MD17G1176600	33.6
i2_HQ_Mix0_5d_c130080/f2p241/2226	1	1965	Chr08	-	5036670	5038617	MD08G1063900	88.2	1966	2220	Chr00	+	46326444	46326698	MD00G1191200	11.5
i2_LQ_Mix0_5d_c95119/f1p3/2631	1	850	Chr00	+	20513084	20516236	MD00G1098500	32.4	851	2626	Chr02	-	27428939	27432887	MD02G1229900	67.6
i5_LQ_Mix0_5d_c1989/f1p0/5277	31	1977	Chr09	-	9562061	9565331	notsure	34.7	1978	5613	Chr03	+	32102004	32388215	MD03G1236300,MD03G1237900,MD03G1237300,MD03G1236700,MD03G1238000,MD03G1236800,MD03G1238400,MD03G1238500,MD03G1235100,MD03G1238100,MD03G1234900,MD03G1237000,MD03G1238600,MD03G1235500,MD03G1235300,MD03G1238200,MD03G1235600,MD03G1235200,MD03G1237500,MD03G1238300,MD03G1235900	64.8
i1_LQ_Mix0_5d_c34374/f1p1/1535	8	186	Chr05	-	46131205	46131383	MD05G1340900	11.6	187	1538	Chr10	-	39858347	39860645	MD10G1314400	87.9
i3_LQ_Mix0_5d_c30693/f1p8/3350	1	2872	Chr12	+	7645584	7650385	MD12G1065300	85.6	2873	3354	Chr13	+	11285911	11287130	MD13G1145100	14.4
i2_LQ_Mix0_5d_c66240/f1p3/2618	3	2311	Chr08	-	2735125	2739753	MD08G1037200	88.2	2312	2617	Chr00	+	6781581	6781886	MD00G1039600	11.7
i2_LQ_Mix0_5d_c31943/f1p23/2882	3	2287	Chr17	+	472799	476146	MD17G1007100	79	2288	2893	Chr12	+	22020521	22021126	notsure	20.9
i2_LQ_Mix0_5d_c34435/f1p48/2653	4	1536	Chr16	-	38917802	38919334	notsure	57.8	1537	2651	Chr07	-	18640515	18642453	MD07G1130400	42
i3_LQ_Mix0_5d_c23496/f1p0/3918	1	2839	Chr11	+	42116473	42127406	MD11G1307000	71.5	2840	3968	Chr13	+	24128836	24131817	MD13G1237100	28.5
i3_LQ_Mix0_5d_c28909/f1p0/3207	4	589	Chr03	+	33835637	33836845	MD03G1250300	18.3	590	3208	Chr11	+	38604139	38611045	MD11G1270400	81.6
i2_LQ_Mix0_5d_c114572/f1p7/2351	1	1073	Chr10	+	39258191	39267152	MD10G1307200	45.6	1074	2351	Chr00	+	40665950	40670430	MD00G1175400	54.3
i3_LQ_Mix0_5d_c6391/f1p8/3127	1	454	Chr00	-	15994200	15995562	notsure	14.6	455	3120	Chr12	-	25063317	25140867	MD12G1169400,MD12G1170500,MD12G1170200,MD12G1170000,MD12G1169700,MD12G1170400,MD12G1169300,MD12G1169600,MD12G1169200,MD12G1169500,MD12G1170100,MD12G1170300	85.4
i2_LQ_Mix0_5d_c115602/f1p24/2225	2	1157	Chr11	-	37689861	37691015	MD11G1262100	51.7	1158	2234	Chr07	-	30709321	30711849	MD07G1233200	48.2
i3_LQ_Mix0_5d_c19862/f1p12/3151	1	1850	Chr15	+	2311514	2314803	MD15G1033000	58.7	1851	3154	Chr12	-	2911419	2912736	MD12G1026300	41.3
i3_LQ_Mix0_5d_c29680/f1p0/3647	4	2156	Chr02	-	3518312	3522593	MD02G1042800	54.9	2157	3917	Chr17	+	7731024	7775823	MD17G1092500	44.9
i2_LQ_Mix0_5d_c180248/f1p522/2078	1	846	Chr05	+	46185529	46187192	MD05G1341400	40.7	847	2078	Chr10	+	39895078	39896310	MD10G1314900	59.3
i2_LQ_Mix0_5d_c34291/f1p3/2508	4	2070	Chr15	+	2502889	2505039	MD15G1035600	82.1	2071	2519	Chr08	-	3459230	3459676	MD08G1045800	17.8
i2_LQ_Mix0_5d_c72097/f1p1/2083	1	1855	Chr12	-	23676877	23679020	MD12G1156200	87	1856	2131	Chr16	+	567034	567310	MD16G1007500	13
i1_LQ_Mix0_5d_c115062/f1p20/1580	1	171	Chr10	-	10710409	10710579	notsure	10.8	172	1582	Chr12	-	3069189	3073325	MD12G1027300	89.2
i2_LQ_Mix0_5d_c63098/f1p15/2399	10	932	Chr07	+	27781205	27783247	MD07G1199400	38.6	933	2389	Chr01	+	24438058	24439511	MD01G1134700	61
i2_LQ_Mix0_5d_c49438/f1p5/2350	2	1232	Chr14	+	29699529	29892422	MD14G1212800,MD14G1214100,MD14G1215200,MD14G1214800,MD14G1212200,MD14G1214200,MD14G1215100,MD14G1212600,MD14G1212300,MD14G1214300,MD14G1213000,MD14G1211900,MD14G1213400,MD14G1212000,MD14G1212400,MD14G1213800	52.1	1233	2361	Chr06	-	33594457	33595982	MD06G1202800	47.8
i1_LQ_Mix0_5d_c118712/f1p4/1449	1	233	Chr10	-	25022049	25022281	notsure	16	234	1458	Chr15	-	8948929	8950259	notsure	84
i2_LQ_Mix0_5d_c38061/f1p16/2883	6	1219	Chr15	+	54271785	54273465	MD15G1442300	42.1	1220	2885	Chr08	+	31124888	31130875	MD08G1247600	57.7
i1_LQ_Mix0_5d_c13461/f1p0/1231	3	601	Chr13	+	33864689	33865287	notsure	48.6	602	1233	Chr03	-	31745377	31746004	MD03G1232500	51.3
i1_LQ_Mix0_5d_c95256/f1p0/1994	2	1122	Chr11	-	42990629	42994166	MD11G1318000	53.2	1123	2108	Chr12	+	27937292	27939128	MD12G1198300	46.8
i1_LQ_Mix0_5d_c113157/f1p4/1960	4	682	Chr08	+	17463721	17464403	notsure	34.1	683	1994	Chr13	-	5723942	5725847	MD13G1081500	65.8
i3_LQ_Mix0_5d_c8493/f1p0/3697	1	2993	Chr00	-	726446	766461	MD00G1005100,MD00G1005200,MD00G1004800	80.1	2994	3738	Chr05	+	34225058	34225839	MD05G1211000	19.9
i0_HQ_Mix0_5d_c981/f5p0/762	3	522	Chr03	+	6725575	6726849	MD03G1082800	68.2	523	763	Chr11	+	7585197	7585436	notsure	31.6
i4_LQ_Mix0_5d_c7083/f1p0/4790	1	1486	Chr14	-	27092969	27095077	MD14G1178200	31	1487	4786	Chr07	+	12285427	12288847	notsure	68.9
i3_LQ_Mix0_5d_c16199/f1p3/3985	1	2309	Chr07	-	4768931	4861126	MD07G1052100,MD07G1052000,MD07G1052500	56.1	2310	4114	Chr14	+	5242562	5609073	MD14G1054500,MD14G1053900,MD14G1054600,MD14G1054900,MD14G1053200,MD14G1053500,MD14G1054700,MD14G1055100,MD14G1053600,MD14G1053100,MD14G1054400,MD14G1055000,MD14G1053700,MD14G1054000	43.9
i2_LQ_Mix0_5d_c116954/f1p3/2333	1	887	Chr02	+	4936308	4938822	MD02G1061400	36.8	888	2411	Chr05	+	27455225	27472551	MD05G1143500	63.2
i2_HQ_Mix0_5d_c84690/f2p5/2911	2	1699	Chr07	-	2599458	2601155	MD07G1032000	58.3	1700	2911	Chr02	+	34943196	34944522	MD02G1294400,MD02G1294500	41.6
i2_LQ_Mix0_5d_c45228/f1p7/2705	4	2283	Chr04	+	25537033	25539312	MD04G1165000	84.1	2284	2710	Chr03	-	25038215	25038641	MD03G1183500	15.8
i1_LQ_Mix0_5d_c4111/f1p263/1677	1	1242	Chr06	+	23617824	23619070	MD06G1099700	73.3	1243	1694	Chr05	+	2088474	2088926	notsure	26.7
i2_LQ_Mix0_5d_c18944/f1p30/2781	8	1334	Chr15	-	41502593	41504207	MD15G1349900	47.7	1335	2777	Chr11	+	6265445	6266888	notsure	51.9
i2_LQ_Mix0_5d_c133527/f1p4/2250	1	1915	Chr03	+	25920201	25922937	MD03G1188800	85	1916	2254	Chr07	+	32722128	32722468	notsure	15
i4_LQ_Mix0_5d_c4172/f1p11/4199	1	1018	Chr15	+	2598902	2600554	MD15G1037400	24.2	1019	4214	Chr15	-	26597869	26601065	notsure	75.8
i2_LQ_Mix0_5d_c61501/f1p6/2274	1	1127	Chr03	-	3380362	3381627	MD03G1043100	49.6	1128	2270	Chr11	-	4007671	4009837	MD11G1046100	50.3
i5_LQ_Mix0_5d_c1447/f1p0/5260	9	1799	Chr10	+	39223223	39226166	MD10G1306500	34	1800	5261	Chr05	-	44770705	44775265	MD05G1320400,MD05G1320300	65.8
i2_LQ_Mix0_5d_c40165/f1p482/2072	1	1199	Chr15	-	29467248	29469972	MD15G1303500	57.9	1200	2067	Chr13	-	12624000	12642712	MD13G1160900	41.9
i2_LQ_Mix0_5d_c50638/f1p11/2328	20	2097	Chr06	-	4263859	4265938	notsure	89	2098	2336	Chr16	+	36653267	36653507	notsure	10.2
i1_LQ_Mix0_5d_c12484/f1p10/1723	2	494	Chr16	+	23629056	23629644	notsure	27.7	495	1782	Chr15	+	10981482	10984698	MD15G1148400	72.3
i2_LQ_Mix0_5d_c154698/f1p37/2233	7	1662	Chr11	-	36208772	36215061	MD11G1249900	74.3	1663	2229	Chr03	-	36305373	36345584	MD03G1283000,MD03G1282700,MD03G1282900,MD03G1283100,MD03G1282800,MD03G1283200,MD03G1283300	25.4
i2_LQ_Mix0_5d_c13873/f1p6/2232	1	455	Chr00	-	15994827	15995569	notsure	20.6	456	2202	Chr12	-	25063484	25140868	MD12G1169400,MD12G1170500,MD12G1170200,MD12G1170000,MD12G1169700,MD12G1170400,MD12G1169300,MD12G1169600,MD12G1169200,MD12G1169500,MD12G1170100,MD12G1170300	79
i2_HQ_Mix0_5d_c1734/f4p5/2726	1	1595	Chr14	+	29699507	29892423	MD14G1212800,MD14G1214100,MD14G1215200,MD14G1214800,MD14G1212200,MD14G1214200,MD14G1215100,MD14G1212600,MD14G1212300,MD14G1214300,MD14G1213000,MD14G1211900,MD14G1213400,MD14G1212000,MD14G1212400,MD14G1213800	58.5	1596	2728	Chr06	-	33594452	33595982	MD06G1202800	41.5
i1_LQ_Mix0_5d_c81993/f1p0/1985	1	447	Chr05	-	4108203	4108660	MD05G1025100	22.5	448	1989	Chr03	-	1479586	1481530	MD03G1019100	77.5
i1_HQ_Mix0_5d_c19663/f4p6/1827	1	1468	Chr15	+	2311525	2314968	MD15G1033000	80.3	1469	1828	Chr14	+	25327471	25327830	MD14G1159200	19.7
i7_LQ_Mix0_5d_c125/f1p0/7430	1	2095	Chr02	+	19998597	20021892	notsure	28.1	2096	7441	Chr07	+	15877921	15887515	MD07G1123200	71.8
i4_LQ_Mix0_5d_c12285/f1p0/4842	1	490	Chr03	+	36818928	36819417	notsure	10.1	491	4868	Chr07	-	14377129	14383772	notsure	89.9
i2_HQ_Mix0_5d_c54636/f2p7/2038	1	1676	Chr15	+	2311570	2314968	MD15G1033000	82.2	1677	2037	Chr14	+	25327471	25327831	MD14G1159200	17.7
i2_LQ_Mix0_5d_c47191/f1p31/2782	1	368	Chr10	-	9066356	9066723	notsure	13.2	369	2783	Chr11	+	34191884	34204804	MD11G1234900	86.8
i1_LQ_Mix0_5d_c44605/f1p0/1722	2	283	Chr11	+	4415041	4415327	MD11G1051600	16.4	284	1721	Chr11	-	4080116	4083465	MD11G1047000	83.5
i3_LQ_Mix0_5d_c4117/f1p7/3799	1	3445	Chr05	-	42679538	42686886	MD05G1294300,MD05G1294400	89.8	3446	3834	Chr10	-	36446685	36447077	MD10G1273000	10.1
i4_LQ_Mix0_5d_c4314/f1p0/4683	1	2671	Chr04	+	30275033	30277712	MD04G1221500	55.8	2672	4783	Chr04	-	1179960	1182924	MD04G1010700	44.2
i3_LQ_Mix0_5d_c21338/f1p0/3862	26	1956	Chr07	-	250830	255013	MD07G1001900	49.9	1957	3870	Chr02	-	37346712	37350882	MD02G1319100	49.5
i2_LQ_Mix0_5d_c39939/f1p0/2074	1	747	Chr05	-	45879802	45880652	notsure	36	748	2073	Chr16	-	16112162	16114322	MD16G1186700	63.9
i2_LQ_Mix0_5d_c30137/f1p46/2404	9	1821	Chr02	+	3169990	3193675	MD02G1039100,MD02G1039000,MD02G1039300,MD02G1039200	74.6	1822	2415	Chr02	-	3293777	3294583	MD02G1040600	24.4
i2_LQ_Mix0_5d_c120005/f1p2/2675	1	1904	Chr02	+	307560	312174	MD02G1004500	71.1	1905	2677	Chr00	-	35612050	35612862	notsure	28.9
i2_HQ_Mix0_5d_c69949/f3p5/2040	1	1757	Chr15	+	2311525	2314803	MD15G1033000	86.1	1758	2041	Chr09	+	1813231	1813640	MD09G1029300	13.9
i2_LQ_Mix0_5d_c64004/f1p3/2681	4	1921	Chr09	-	18300893	18379516	MD09G1200000,MD09G1199900,MD09G1200400,MD09G1200300,MD09G1200600,MD09G1199800	71.4	1922	2687	Chr02	-	10943322	10944086	MD02G1134800	28.5
i1_LQ_Mix0_5d_c156339/f1p3/1297	3	547	Chr11	+	32280172	32288448	MD11G1220300	41.9	548	1300	Chr15	-	4778797	4779550	MD15G1069800	57.9
i2_LQ_Mix0_5d_c30477/f1p21/2221	1	1426	Chr02	+	34127289	34128721	notsure	64.1	1427	2220	Chr17	-	1416140	1417015	MD17G1018100	35.7
i2_LQ_Mix0_5d_c64651/f1p17/2396	1	383	Chr12	-	2903271	2903911	MD12G1026200	15.6	384	2449	Chr10	-	11636139	11638461	MD10G1079800	84.4
i2_LQ_Mix0_5d_c6584/f1p24/2952	18	1592	Chr04	-	5916166	5919059	notsure	53.3	1593	2953	Chr06	-	6756421	6759266	MD06G1049800	46.1
i2_HQ_Mix0_5d_c4684/f5p11/2907	1	2604	Chr00	-	16049117	16057336	MD00G1080400	89.8	2605	2901	Chr06	+	18216478	18216775	notsure	10.2
i1_LQ_Mix0_5d_c134721/f1p5/1894	1	825	Chr16	+	38918635	38919459	MD16G1283000	43.5	826	1895	Chr00	-	48263536	48264605	MD00G1202200	56.5
i2_LQ_Mix0_5d_c5213/f3p10/2385	1	2118	Chr03	-	7330814	7332931	MD03G1088900	89	2119	2372	Chr11	-	8118211	8118464	notsure	10.7
i2_HQ_Mix0_5d_c23804/f3p8/2220	1	1772	Chr15	+	2311525	2314803	MD15G1033000	79.7	1773	2222	Chr08	+	25430593	25431264	notsure	20.3
i4_LQ_Mix0_5d_c3494/f1p0/4227	1	1181	Chr05	-	29076147	29079141	MD05G1162100	27.6	1182	4277	Chr10	+	27058179	27274813	MD10G1177800,MD10G1177500,MD10G1178500,MD10G1178400,MD10G1178900,MD10G1176800,MD10G1178300,MD10G1177000,MD10G1177400,MD10G1178200	72.4
i3_HQ_Mix0_5d_c9605/f2p29/3119	1	548	Chr03	+	37044316	37045608	MD03G1294100	17.6	549	3119	Chr00	-	42103128	42107260	MD00G1179500	82.4
i2_LQ_Mix0_5d_c115878/f1p45/2463	1	1175	Chr16	+	38914998	38916173	MD16G1283000	47.7	1176	2463	Chr13	+	16727415	16730433	MD13G1193100	52.3
i1_LQ_Mix0_5d_c156519/f1p5/1940	2	211	Chr09	-	22438689	22438989	notsure	11.2	212	1874	Chr17	-	24515913	24522322	MD17G1202800	88.7
i2_HQ_Mix0_5d_c8830/f7p42/2572	1	574	Chr09	+	28299724	28300296	MD09G1229200	22.3	575	2572	Chr16	+	6939479	6950847	MD16G1100100	77.7
i2_LQ_Mix0_5d_c77678/f1p16/2322	2	1837	Chr16	+	12361147	12365492	MD16G1155600	77.5	1838	2368	Chr05	+	17863360	17864270	notsure	22.4
i2_LQ_Mix0_5d_c174759/f1p0/2050	1	1769	Chr01	-	20170986	20172754	MD01G1088700	85.4	1770	2070	Chr07	-	23355678	23355980	notsure	14.5
i1_LQ_Mix0_5d_c82856/f1p0/1592	1	1284	Chr07	-	13047616	13048899	MD07G1112300	80	1285	1605	Chr12	+	5285917	5286236	notsure	20
i2_LQ_Mix0_5d_c84250/f1p137/3311	1	614	Chr14	+	870452	871036	notsure	18.5	615	3311	Chr14	+	32157503	32164180	MD14G1243200	81.4
i5_LQ_Mix0_5d_c1300/f1p13/5219	1	2766	Chr15	-	28028840	28033069	MD15G1297600,MD15G1297500	52.7	2767	5245	Chr10	+	19253745	19256223	notsure	47.3
i2_HQ_Mix0_5d_c72464/f2p13/2161	1	1723	Chr07	-	4764729	4770904	MD07G1052000	79.6	1724	2165	Chr02	+	32146683	32147128	MD02G1267100	20.4
i2_LQ_Mix0_5d_c46505/f1p38/2284	1	1264	Chr17	-	29244040	29246426	MD17G1243900	55.1	1265	2295	Chr15	-	14418857	14420764	MD15G1181900	44.9
i2_LQ_Mix0_5d_c53100/f1p9/2143	1	894	Chr02	+	228089	228970	MD02G1002900	41.6	895	2144	Chr15	+	10871868	10875169	MD15G1146100	58.2
i2_HQ_Mix0_5d_c49723/f2p17/2434	1	2153	Chr00	-	16049117	16057334	MD00G1080400	88.3	2154	2438	Chr06	+	18216478	18216764	notsure	11.7
i4_LQ_Mix0_5d_c8912/f1p41/4200	1	3324	Chr09	-	37434748	37448397	MD09G1292000,MD09G1291900	76.6	3325	4341	Chr02	-	20428625	20429646	notsure	23.4
i0_LQ_Mix0_5d_c10035/f1p8/358	1	155	Chr16	+	38918483	38918637	MD16G1283000	43.7	156	355	Chr15	-	2928602	2928801	MD15G1041900	56.3
