# Supplementary material for: PacBio full-length transcriptome of wild apple (Malus sieversii) provides insights into canker disease dynamic response
Source: BMC Genomics. 2021 Jan 14;22:52. doi: 10.1186/s12864-021-07366-y (PMC7809858; doi:10.1186/s12864-021-07366-y)
Supplement: Supplementary file 5 — Additional file 5. Details regarding lncRNA. [file 12864_2021_7366_MOESM5_ESM.xlsx]

## Sheet: Sheet1
transcript_id	gene_id	type	length	exon_number	{nr}	{SwissProt}	{KEGG}	{KOG}	{GO}	{nt}	{pfam}	WW_0d_FPKM	WF_1d_FPKM	WF_2d_FPKM	WF_5d_FPKM	WF_1dpi_readcount	WW_0dpi_readcount	log2FoldChange	pval	padj	significant	WF_2dpi_readcount	WF_1dpi_readcount	log2FoldChange	pval	padj	significant	WF_2dpi_readcount	WW_0dpi_readcount	log2FoldChange	pval	padj	significant	WF_5dpi_readcount	WF_1dpi_readcount	log2FoldChange	pval	padj	significant	WF_5dpi_readcount	WF_2dpi_readcount	log2FoldChange	pval	padj	significant	WF_5dpi_readcount	WW_0dpi_readcount	log2FoldChange	pval
MD00G1002100_novel01	MD00G1002100	Novel_lncRNA	207	2	{XP_009365752.1; PREDICTED: acyl-CoA-binding protein [Pyrus x bretschneideri]}	{sp|Q39779|ACBP_GOSHI; Acyl-CoA-binding protein OS=Gossypium hirsutum PE=3 SV=1}	{pop:POPTR_0003s10270g; K08762 DBI, ACBP diazepam-binding inhibitor (GABA receptor modulator, acyl-CoA-binding protein) - ko03320; Organismal Systems; Endocrine system; PPAR signaling pathway}	{At1g31812; KOG0817 Acyl-CoA-binding protein I Lipid transport and metabolism ;}	{NA}	{XM_009344916.2; PREDICTED: Pyrus x bretschneideri acyl-CoA-binding protein (LOC103935163), mRNA}	{NA}	27561	15708	24475.2	23375.3	49.1807	56.031	-0.18813	0.79089	0.97752	FALSE	70.6295	50.5262	0.48324	0.47158	1	FALSE	76.9922	61.1394	0.33261	0.51382	0.7938	FALSE	62.0871	44.7029	0.47392	0.46619	0.90968	FALSE	68.3689	68.4175	-0.0010246	0.96445	1	FALSE	66.8663	53.6716	0.31712	0.50723
MD00G1009000_novel11	MD00G1009000	Novel_lncRNA	336	1	{NA}	{NA}	{NA}	{NA}	{NA}	{XM_008373501.2; PREDICTED: Malus x domestica acetolactate synthase small subunit 1, chloroplastic-like (LOC103435112), mRNA}	{NA}	3314.18	5684.36	6133.88	6740.53	347.217	122.368	1.5046	0.0064753	0.065514	FALSE	314.834	355.872	-0.17677	0.70464	1	FALSE	343.256	133.549	1.3619	0.0019417	0.022202	TRUE	300.417	314.713	-0.06707	0.86188	1	FALSE	333.391	305.745	0.12489	0.81517	1	FALSE	326.555	117.146	1.479	0.0012606
MD00G1023700_novel01	MD00G1023700	Novel_lncRNA	2095	7	{XP_017183448.1; PREDICTED: uncharacterized protein LOC103419842 [Malus domestica]}	{NA}	{NA}	{NA}	{NA}	{XR_001951859.1; PREDICTED: Pyrus x bretschneideri uncharacterized LOC103933247 (LOC103933247), transcript variant X3, ncRNA}	{NA}	150.027	108.477	120.28	115.997	144.03	119.247	0.27241	0.65416	0.90551	FALSE	125.984	147.867	-0.23106	0.75752	1	FALSE	137.271	130.482	0.073179	0.81945	0.95803	FALSE	103.109	130.76	-0.34276	0.57378	0.94005	FALSE	114.465	122.669	-0.099862	0.73998	1	FALSE	112.171	114.291	-0.027012	0.8884
MD00G1023700_novel02	MD00G1023700	Novel_lncRNA	2232	6	{XP_017183448.1; PREDICTED: uncharacterized protein LOC103419842 [Malus domestica]}	{NA}	{NA}	{NA}	{NA}	{XR_001786618.1; PREDICTED: Malus x domestica uncharacterized LOC108170255 (LOC108170255), ncRNA}	{NA}	342.52	279.187	327.623	282.823	388.816	292.663	0.40984	0.44269	0.77183	FALSE	369.289	398.901	-0.11128	0.84653	1	FALSE	402.67	319.834	0.33227	0.41405	0.71563	FALSE	267.962	352.785	-0.39676	0.56467	0.93548	FALSE	296.341	359.171	-0.27741	0.61472	1	FALSE	289.458	280.342	0.046165	0.83989
MD00G1024300_novel01	MD00G1024300	Novel_lncRNA	945	2	{NA}	{NA}	{NA}	{NA}	{NA}	{XR_001790213.1; PREDICTED: Malus x domestica uncharacterized LOC103437679 (LOC103437679), ncRNA}	{NA}	23.59	16.2867	16.8133	36.8333	7.45038	6.97262	0.095614	0.93607	1	FALSE	6.65205	7.63721	-0.19925	0.81456	1	FALSE	7.26165	7.60429	-0.066517	0.95572	1	FALSE	12.3322	6.75702	0.86797	0.36123	0.88678	FALSE	13.6637	6.45482	1.0819	0.18299	0.86228	FALSE	13.3559	6.66806	1.0021	0.20866
MD00G1031200_novel11	MD00G1031200	Novel_lncRNA	327	1	{NA}	{NA}	{NA}	{NA}	{NA}	{FN823234.1; Malus x domestica genomic sequence for BAC clone MC-12 containing a Mal d 1 gene cluster}	{NA}	2541.38	1696.32	2084.98	1926.4	90.2377	84.2115	0.099714	0.82809	0.98598	FALSE	97.4615	92.6154	0.073581	0.91183	1	FALSE	106.192	91.7994	0.21011	0.60645	0.85143	FALSE	77.4373	81.9535	-0.081776	0.91929	1	FALSE	85.597	94.789	-0.14716	0.79043	1	FALSE	83.6466	80.5577	0.054285	0.84702
MD00G1037200_novel01	MD00G1037200	Novel_lncRNA	1952	2	{NA}	{NA}	{NA}	{NA}	{NA}	{XR_530698.2; PREDICTED: Malus x domestica uncharacterized LOC103444824 (LOC103444824), transcript variant X3, ncRNA}	{NA}	139.823	113.523	126.643	121.523	142.794	102.379	0.48001	0.49349	0.81065	FALSE	120.177	147.051	-0.29115	0.71027	1	FALSE	131.042	111.861	0.22832	0.66427	0.89243	FALSE	99.6632	130.06	-0.38404	0.70146	0.97679	FALSE	110.598	116.553	-0.075663	1	1	FALSE	108.055	98.0462	0.14024	0.72146
MD00G1055200_novel21	MD00G1055200	Novel_lncRNA	379	1	{NA}	{NA}	{NA}	{NA}	{NA}	{XM_017333402.1; PREDICTED: Malus x domestica cysteine protease ATG4 (LOC103438347), mRNA}	{NA}	54.18	50.8667	61.15	31.8333	4.52008	3.00696	0.58804	0.7007	0.93316	FALSE	4.67173	4.64005	0.0098165	0.94596	1	FALSE	5.07237	3.30201	0.61932	0.64669	0.87716	FALSE	2.0488	4.10476	-1.0025	0.49416	0.91345	FALSE	2.27043	4.58293	-1.0133	0.50028	0.98512	FALSE	2.22592	2.888	-0.37567	0.84337
MD00G1056700_novel02	MD00G1056700	Novel_lncRNA	1242	2	{NA}	{NA}	{NA}	{NA}	{NA}	{XM_008395228.2; PREDICTED: Malus x domestica myosin-15-like (LOC103455646), transcript variant X4, mRNA}	{NA}	25.35	4.99	8.7	14.81	3.7428	10.8477	-1.5352	0.12779	0.42752	FALSE	4.75157	3.85702	0.30092	0.79572	1	FALSE	5.17566	11.8228	-1.1918	0.19538	0.50685	FALSE	7.15835	3.41109	1.0694	0.37575	0.88797	FALSE	7.97613	4.60868	0.79133	0.54033	1	FALSE	7.84739	10.3832	-0.40396	0.56792
MD00G1066900_novel01	MD00G1066900	Novel_lncRNA	1483	1	{NA}	{NA}	{NA}	{NA}	{NA}	{XR_524717.2; PREDICTED: Malus x domestica uncharacterized LOC103407237 (LOC103407237), ncRNA}	{NA}	6247.39	2172.23	3310.16	1598.08	1738.45	3310.47	-0.92924	0.11589	0.40137	FALSE	2271.59	1782.5	0.3498	0.58082	1	FALSE	2474.27	3616.32	-0.54752	0.19768	0.50803	FALSE	932.356	1577.29	-0.75849	0.24025	0.85748	FALSE	1026.11	2206.86	-1.1048	0.041349	0.62121	FALSE	1001.64	3170.14	-1.6622	0.0033538
MD00G1069900	MD00G1069900	Novel_lncRNA	732	2	{NA}	{NA}	{NA}	{NA}	{NA}	{NA}	{NA}	1092.51	1042.79	1123.87	686.28	356.682	224.491	0.66798	0.29049	0.63244	FALSE	295.482	367.306	-0.31391	0.71551	1	FALSE	321.416	245.447	0.38903	0.35341	0.66999	FALSE	158.038	324.959	-1.04	0.15035	0.80416	FALSE	174.439	286.87	-0.71767	0.17486	0.85486	FALSE	170.226	215.019	-0.33701	0.53024
MD00G1069900_novel01	MD00G1069900	Novel_lncRNA	731	2	{NA}	{NA}	{NA}	{NA}	{NA}	{NA}	{NA}	11377.5	10374.5	10058.2	7118.29	3608.61	2327.29	0.63279	0.32038	0.66313	FALSE	2648.23	3713.68	-0.48782	0.46911	1	FALSE	2882.19	2543.17	0.18054	0.66853	0.89375	FALSE	1643.9	3284.8	-0.99869	0.19671	0.83251	FALSE	1816.38	2569.82	-0.5006	0.43077	0.98512	FALSE	1770.83	2228.02	-0.33133	0.643
MD00G1075500_novel01	MD00G1075500	Novel_lncRNA	306	1	{NA}	{NA}	{NA}	{NA}	{NA}	{XM_008392899.2; PREDICTED: Malus x domestica ferredoxin, root R-B1 (LOC103453352), mRNA}	{NA}	4489.1	2558.41	4464.72	7188.09	106.858	113.891	-0.09196	0.99847	1	FALSE	159.78	109.344	0.54721	0.46875	1	FALSE	174.321	124.119	0.49002	0.29986	0.61859	FALSE	223.784	96.6799	1.2108	0.092692	0.71163	FALSE	247.691	154.908	0.67714	0.21601	0.88073	FALSE	243.147	108.963	1.158	0.062084
MD00G1102700_novel03	MD00G1102700	Novel_lncRNA	345	1	{NA}	{NA}	{NA}	{NA}	{NA}	{XM_008387148.2; PREDICTED: Malus x domestica heavy metal-associated isoprenylated plant protein 3 (LOC103447921), mRNA}	{NA}	56323.4	43569.9	35746	24280.5	3045.35	2262	0.42901	0.48411	0.80349	FALSE	2033.4	3131.41	-0.62292	0.31176	1	FALSE	2217.78	2465.56	-0.1528	0.7096	0.91042	FALSE	1174.26	2769.41	-1.2378	0.068034	0.63734	FALSE	1298.94	1976.25	-0.60543	0.23694	0.90778	FALSE	1271.54	2163.42	-0.76674	0.14248
MD00G1104000_novel03	MD00G1104000	Novel_lncRNA	217	1	{NA}	{NA}	{NA}	{NA}	{NA}	{XM_008380298.2; PREDICTED: Malus x domestica probable eukaryotic translation initiation factor 5-1 (LOC103441616), mRNA}	{NA}	4726.73	3613	3265.23	6476.21	17.3318	14.0032	0.30767	0.7284	0.94544	FALSE	14.9522	17.8059	-0.252	0.76797	1	FALSE	16.3259	15.3058	0.093082	0.95354	1	FALSE	25.7316	15.7491	0.70827	0.3821	0.88797	FALSE	28.59	14.5282	0.97666	0.17638	0.85486	FALSE	28.0707	13.4157	1.0651	0.13037
MD00G1110200_novel01	MD00G1110200	Novel_lncRNA	364	1	{NA}	{NA}	{NA}	{NA}	{NA}	{NA}	{NA}	4224.92	2897.19	1513.3	1007.92	247.368	206.659	0.2594	0.7345	0.94544	FALSE	103.94	254.237	-1.2904	0.18667	1	FALSE	113.063	226.328	-1.0013	0.26804	0.58134	FALSE	57.7854	224.781	-1.9597	0.013892	0.3049	FALSE	64.0244	101.731	-0.66807	0.47128	0.98512	FALSE	62.6881	198.223	-1.6609	0.0089458
MD00G1110500_novel04	MD00G1110500	Novel_lncRNA	498	1	{NA}	{NA}	{NA}	{NA}	{GO:0005622; intracellular; cellular_component GO:0006355; regulation of transcription, DNA-dependent; biological_process}	{XM_008394169.2; PREDICTED: Malus x domestica E3 ubiquitin-protein ligase At1g12760-like (LOC103454568), transcript variant X4, mRNA}	{PF03165:MH1 domain}	2902.94	2117.11	1866.17	2633.79	385.241	305.937	0.33253	0.63043	0.89635	FALSE	264.928	396.439	-0.5815	0.3816	1	FALSE	288.925	334.326	-0.21056	0.60775	0.85232	FALSE	319.137	350.613	-0.1357	0.85713	1	FALSE	353.977	257.397	0.45966	0.39121	0.98512	FALSE	347.147	293.023	0.24453	0.68921
MD00G1129900_novel01	MD00G1129900	Novel_lncRNA	1863	1	{NA}	{NA}	{NA}	{NA}	{NA}	{XR_001790930.1; PREDICTED: Malus x domestica uncharacterized LOC103443363 (LOC103443363), ncRNA}	{NA}	68.4033	32.4667	59.4333	79.2267	34.4004	47.5761	-0.46781	0.52609	0.83109	FALSE	53.4296	35.253	0.59989	0.42133	1	FALSE	58.2463	51.9863	0.16404	0.7749	0.94079	FALSE	60.7167	31.1895	0.96103	0.1648	0.81275	FALSE	66.9652	51.84	0.36935	0.44476	0.98512	FALSE	65.4678	45.5758	0.52252	0.27365
MD00G1141700_novel02	MD00G1141700	Novel_lncRNA	269	1	{XP_008369939.1; PREDICTED: aldo-keto reductase family 4 member C10-like [Malus domestica]}	{NA}	{mdm:103450270; - - - - -}	{NA}	{NA}	{XM_008371717.2; PREDICTED: Malus x domestica aldo-keto reductase family 4 member C10-like (LOC103433453), mRNA}	{NA}	68.6267	884.147	1766.8	9440.36	18.2466	0.91759	4.3136	0.21354	0.5374	FALSE	34.1614	18.5058	0.88439	0.72644	1	FALSE	37.3653	1.00193	5.2209	0.0038645	0.035559	TRUE	159.776	16.3444	3.2892	0.001338	0.074053	FALSE	177.334	32.9813	2.4267	0.0038687	0.26002	FALSE	174.321	0.878726	7.6321	1.1433e-08
MD00G1143500_novel04	MD00G1143500	Novel_lncRNA	205	1	{NA}	{NA}	{NA}	{NA}	{NA}	{XM_008359050.2; PREDICTED: Malus x domestica probable WRKY transcription factor 40 (LOC103421017), transcript variant X1, mRNA}	{NA}	0	0	0	0	0	0	NA	NA	NA	NA	0	0	NA	NA	NA	NA	0	0	NA	NA	NA	NA	0	0	NA	NA	NA	NA	0	0	NA	NA	NA	NA	0	0	NA	NA
MD00G1150000_novel01	MD00G1150000	Novel_lncRNA	1837	9	{XP_017180333.1; PREDICTED: uncharacterized protein LOC103407876 [Malus domestica]}	{NA}	{NA}	{NA}	{NA}	{XR_001786303.1; PREDICTED: Malus x domestica uncharacterized LOC103405369 (LOC103405369), transcript variant X5, ncRNA}	{NA}	55.23	48.0833	63.2067	65.4267	55.7231	37.545	0.56965	0.45705	0.78721	FALSE	56.2193	57.4185	-0.03045	0.95293	1	FALSE	61.3197	40.9903	0.58107	0.28572	0.60383	FALSE	49.7018	50.7919	-0.031299	0.90612	1	FALSE	54.9939	54.5366	0.012047	0.92264	1	FALSE	53.7663	35.9292	0.58155	0.24846
MD00G1157300_novel02	MD00G1157300	Novel_lncRNA	566	1	{XP_017191963.1; PREDICTED: putative glutathione-specific gamma-glutamylcyclotransferase 2 isoform X1 [Malus domestica]}	{NA}	{mdm:103450651; - - - - -}	{NA}	{NA}	{XM_008390016.2; PREDICTED: Malus x domestica putative glutathione-specific gamma-glutamylcyclotransferase 2 (LOC103450651), transcript variant X2, mRNA}	{NA}	548.183	915.64	462.503	530.303	230.099	73.9155	1.6383	0.29951	0.64169	FALSE	81.7358	237.662	-1.5399	0.33445	1	FALSE	89.1121	80.6591	0.14378	0.79475	0.94119	FALSE	80.8944	210.162	-1.3774	0.38414	0.88797	FALSE	89.4171	79.2572	0.17401	0.66025	1	FALSE	87.4134	70.7661	0.3048	0.47018
MD00G1163000_novel02	MD00G1163000	Novel_lncRNA	279	1	{NA}	{NA}	{NA}	{NA}	{NA}	{XM_018650739.1; PREDICTED: Pyrus x bretschneideri ras-related protein RABC1-like (LOC103960639), transcript variant X2, mRNA}	{NA}	1093.85	378.097	810.363	838.31	9.43618	18.1638	-0.94479	0.31991	0.66313	FALSE	18.5911	9.65091	0.94587	0.33795	1	FALSE	20.2739	19.8392	0.031271	1	1	FALSE	16.8838	8.54022	0.98329	0.41631	0.90298	FALSE	18.4993	18.0065	0.03895	0.88976	1	FALSE	18.0468	17.405	0.052242	0.8964
MD00G1174500_novel02	MD00G1174500	Novel_lncRNA	1147	5	{NA}	{NA}	{NA}	{NA}	{NA}	{XR_001786236.1; PREDICTED: Malus x domestica uncharacterized LOC103404948 (LOC103404948), transcript variant X1, ncRNA}	{NA}	1.56	0	1.13667	0.9	0	0.608987	#NAME?	0.63277	0.89635	FALSE	0.611618	0	Inf	0.63936	1	FALSE	0.669545	0.668061	0.003201	1	1	FALSE	0.407272	0	Inf	0.98373	1	FALSE	0.460009	0.594535	-0.3701	1	1	FALSE	0.456517	0.584929	-0.35759	1
MD00G1174700	MD00G1174700	Novel_lncRNA	1014	2	{XP_018506872.1; PREDICTED: uncharacterized protein K02A2.6-like [Pyrus x bretschneideri]}	{NA}	{mdm:103448845; - - - - -}	{NA}	{NA}	{XR_001791178.1; PREDICTED: Malus x domestica uncharacterized LOC108174368 (LOC108174368), transcript variant X1, ncRNA}	{NA}	13.6733	11.6267	21.7367	2.02333	5.64658	4.48069	0.33366	0.7811	0.97188	FALSE	9.4729	5.78253	0.71211	0.54316	1	FALSE	10.3344	4.91439	1.0724	0.26908	0.58134	FALSE	0.747526	5.11695	-2.7751	0.064892	0.63734	FALSE	0.830057	9.20571	-3.4712	0.0074546	0.38078	FALSE	0.818029	4.29803	-2.3935	0.10047
MD00G1190700_novel04	MD00G1190700	Novel_lncRNA	307	1	{XP_008381033.1; PREDICTED: putative laccase-9 [Malus domestica]}	{NA}	{pxb:103946137; K05909 E1.10.3.2 laccase 1.10.3.2 -}	{NA}	{NA}	{XM_008382811.2; PREDICTED: Malus x domestica putative laccase-9 (LOC103443908), mRNA}	{NA}	357.213	32.73	15.87	110.753	1.29054	9.336	-2.8548	0.033119	0.20349	FALSE	0.545996	1.31886	-1.2723	0.64853	1	FALSE	0.592196	10.1721	-4.1024	0.0022078	0.02373	TRUE	3.42588	1.16687	1.5538	0.36103	0.88678	FALSE	3.74609	0.532001	2.8159	0.10687	0.71555	FALSE	3.64373	8.93649	-1.2943	0.24801
MD01G1001600_novel07	MD01G1001600	Novel_lncRNA	509	1	{NA}	{NA}	{NA}	{NA}	{NA}	{AB826124.1; Pyrus pyrifolia var. culta mRNA for putative actin, partial cds, clone: Actin#1}	{NA}	24676.6	14806.4	20304.3	19637.3	2630.75	2719.57	-0.047906	0.96831	1	FALSE	2967.96	2698.86	0.13712	0.82916	1	FALSE	3233.94	2970.02	0.12282	0.74908	0.92177	FALSE	2467.7	2387.26	0.047813	0.96926	1	FALSE	2729.43	2883.4	-0.079169	0.86362	1	FALSE	2671.31	2604.3	0.036651	0.95411
MD01G1020100_novel02	MD01G1020100	Novel_lncRNA	1717	1	{NA}	{NA}	{NA}	{NA}	{NA}	{LN885255.1; Acacia cerastes chloroplast partial genome, isolate 592CER}	{NA}	75.7467	29.04	64.05	63.83	29.9796	47.5641	-0.66589	0.29035	0.63244	FALSE	52.6991	30.7954	0.77507	0.21655	1	FALSE	57.4044	51.9149	0.14501	0.75414	0.92655	FALSE	44.8173	27.2388	0.71839	0.27349	0.86303	FALSE	49.5819	51.2494	-0.047722	0.9261	1	FALSE	48.496	45.5102	0.091676	0.86615
MD01G1034200_novel03	MD01G1034200	Novel_lncRNA	215	1	{NA}	{NA}	{NA}	{NA}	{NA}	{XM_009346174.1; PREDICTED: Pyrus x bretschneideri ras-related protein Rab11D (LOC103936337), mRNA}	{NA}	12498.1	7135.97	6012.33	5834.45	31.9506	33.3169	-0.060412	0.88786	0.99621	FALSE	24.8054	32.8505	-0.40526	0.64137	1	FALSE	27.0199	36.3921	-0.4296	0.49078	0.77952	FALSE	21.4911	29.0542	-0.43501	0.51236	0.92515	FALSE	23.9239	24.1325	-0.01253	0.846	1	FALSE	23.5139	31.8946	-0.4398	0.35199
MD01G1035900_novel02	MD01G1035900	Novel_lncRNA	1791	5	{XP_008361941.1; PREDICTED: uncharacterized protein LOC103425631 [Malus domestica]}	{NA}	{mdm:103452762; - - - - -}	{NA}	{NA}	{AM167520.1; Malus x domestica transposon gene for putative DNA topoisomerase II, hypothetical protein, putative CC-NBS-LRR resistance protein, and putative cyclin-related protein}	{NA}	2340.66	708.093	1188.62	1411.07	724.03	1549.16	-1.0974	0.052782	0.26875	FALSE	1010.84	742.309	0.44546	0.4735	1	FALSE	1100.72	1692.9	-0.62105	0.12683	0.39564	FALSE	1033.47	656.727	0.65413	0.33522	0.87353	FALSE	1139.83	981.398	0.21591	0.67558	1	FALSE	1114.76	1483.46	-0.41224	0.41806
MD01G1036100_novel01	MD01G1036100	Novel_lncRNA	970	2	{NA}	{NA}	{NA}	{NA}	{NA}	{NA}	{NA}	894.903	476.093	502.197	265.453	218.717	275.546	-0.33323	0.67603	0.91956	FALSE	202.709	223.884	-0.14334	0.78645	1	FALSE	220.645	300.638	-0.4463	0.35808	0.67201	FALSE	91.2922	198.099	-1.1177	0.17213	0.81275	FALSE	100.713	197.334	-0.97039	0.03649	0.5962	FALSE	98.4585	263.677	-1.4212	0.0018969
MD01G1036100_novel02	MD01G1036100	Novel_lncRNA	2500	1	{NA}	{NA}	{NA}	{NA}	{NA}	{XR_001788822.1; PREDICTED: Malus x domestica uncharacterized LOC103425606 (LOC103425606), transcript variant X3, ncRNA}	{NA}	278.403	85.2133	96.2733	54.37	119.147	269.157	-1.1757	0.055459	0.27471	FALSE	122.196	121.967	0.0027045	0.92694	1	FALSE	133.16	294.06	-1.1429	0.010415	0.075689	FALSE	57.5468	107.942	-0.90745	0.3752	0.88797	FALSE	63.2908	118.854	-0.90913	0.073311	0.65929	FALSE	61.7689	257.715	-2.0608	1.2771e-05
MD01G1037000_novel01	MD01G1037000	Novel_lncRNA	1116	5	{XP_009361897.1; PREDICTED: retinoblastoma-related protein-like isoform X2 [Pyrus x bretschneideri]}	{sp|Q9LKZ3|RBR1_ARATH; Retinoblastoma-related protein 1 OS=Arabidopsis thaliana GN=RBR1 PE=1 SV=1}	{pop:POPTR_0001s06870g; K04681 RBL1 retinoblastoma-like protein 1 - ko04350; Environmental Information Processing; Signal transduction; TGF-beta signaling pathway | ko04110; Cellular Processes; Cell growth and death; Cell cycle | ko05203; Human Diseases; Cancers: Overview; Viral carcinogenesis}	{At3g12280; KOG1010 Rb (Retinoblastoma tumor suppressor)-related protein D Cell cycle control, cell division, chromosome partitioning ;}	{NA}	{XR_531484.2; PREDICTED: Malus x domestica uncharacterized LOC103450039 (LOC103450039), transcript variant X1, ncRNA}	{NA}	1026.2	587.003	722.13	494.447	354.075	382.391	-0.111	0.79959	0.97959	FALSE	350.317	364.109	-0.055708	0.99863	1	FALSE	381.652	417.749	-0.13038	0.79061	0.94079	FALSE	204.893	322.122	-0.65273	0.35035	0.87968	FALSE	226.512	340.473	-0.58795	0.2285	0.90341	FALSE	221.392	366.275	-0.72632	0.12777
MD01G1037000_novel02	MD01G1037000	Novel_lncRNA	1615	4	{XP_009361897.1; PREDICTED: retinoblastoma-related protein-like isoform X2 [Pyrus x bretschneideri]}	{sp|Q9LKZ3|RBR1_ARATH; Retinoblastoma-related protein 1 OS=Arabidopsis thaliana GN=RBR1 PE=1 SV=1}	{pop:POPTR_0001s06870g; K04681 RBL1 retinoblastoma-like protein 1 - ko04350; Environmental Information Processing; Signal transduction; TGF-beta signaling pathway | ko04110; Cellular Processes; Cell growth and death; Cell cycle | ko05203; Human Diseases; Cancers: Overview; Viral carcinogenesis}	{At3g12280; KOG1010 Rb (Retinoblastoma tumor suppressor)-related protein D Cell cycle control, cell division, chromosome partitioning ;}	{NA}	{XR_001791577.1; PREDICTED: Malus x domestica uncharacterized LOC103450039 (LOC103450039), transcript variant X2, ncRNA}	{NA}	19.9667	6.43333	15.6967	9.77	6.37831	12.041	-0.91671	0.38368	0.72383	FALSE	12.2112	6.52811	0.90347	0.4455	1	FALSE	13.3564	13.1599	0.021382	0.9505	1	FALSE	6.31621	5.77159	0.13009	0.94397	1	FALSE	7.00723	11.803	-0.75224	0.55561	1	FALSE	6.83973	11.545	-0.75526	0.44749
MD01G1037000_novel03	MD01G1037000	Novel_lncRNA	2653	4	{XP_009361896.1; PREDICTED: retinoblastoma-related protein-like isoform X1 [Pyrus x bretschneideri]}	{sp|Q9LKZ3|RBR1_ARATH; Retinoblastoma-related protein 1 OS=Arabidopsis thaliana GN=RBR1 PE=1 SV=1}	{pop:POPTR_0001s06870g; K04681 RBL1 retinoblastoma-like protein 1 - ko04350; Environmental Information Processing; Signal transduction; TGF-beta signaling pathway | ko04110; Cellular Processes; Cell growth and death; Cell cycle | ko05203; Human Diseases; Cancers: Overview; Viral carcinogenesis}	{At3g12280; KOG1010 Rb (Retinoblastoma tumor suppressor)-related protein D Cell cycle control, cell division, chromosome partitioning ;}	{NA}	{XR_001791577.1; PREDICTED: Malus x domestica uncharacterized LOC103450039 (LOC103450039), transcript variant X2, ncRNA}	{NA}	40.0867	5.68	11.9267	27.06	8.30523	41.3147	-2.3146	0.0023074	0.032053	TRUE	15.7445	8.51046	0.88754	0.51552	1	FALSE	17.1754	45.1057	-1.393	0.012859	0.086562	FALSE	30.526	7.53416	2.0185	0.01978	0.34606	FALSE	33.5486	15.2059	1.1416	0.078591	0.66977	FALSE	32.7255	39.5623	-0.27371	0.72188
MD01G1037000_novel04	MD01G1037000	Novel_lncRNA	2765	3	{XP_009361896.1; PREDICTED: retinoblastoma-related protein-like isoform X1 [Pyrus x bretschneideri]}	{sp|Q9LKZ3|RBR1_ARATH; Retinoblastoma-related protein 1 OS=Arabidopsis thaliana GN=RBR1 PE=1 SV=1}	{pop:POPTR_0001s06870g; K04681 RBL1 retinoblastoma-like protein 1 - ko04350; Environmental Information Processing; Signal transduction; TGF-beta signaling pathway | ko04110; Cellular Processes; Cell growth and death; Cell cycle | ko05203; Human Diseases; Cancers: Overview; Viral carcinogenesis}	{At3g12280; KOG1010 Rb (Retinoblastoma tumor suppressor)-related protein D Cell cycle control, cell division, chromosome partitioning ;}	{NA}	{XR_001791577.1; PREDICTED: Malus x domestica uncharacterized LOC103450039 (LOC103450039), transcript variant X2, ncRNA}	{NA}	126.953	61.1533	100.507	64.5933	101.863	137.244	-0.43011	0.50445	0.81468	FALSE	143.477	104.455	0.45794	0.47247	1	FALSE	156.405	149.787	0.062372	0.85935	0.97699	FALSE	77.1034	92.4162	-0.26135	0.64195	0.95614	FALSE	85.1036	139.564	-0.71363	0.1304	0.7535	FALSE	83.2467	131.365	-0.65811	0.14617
MD01G1037000_novel05	MD01G1037000	Novel_lncRNA	957	4	{XP_009361897.1; PREDICTED: retinoblastoma-related protein-like isoform X2 [Pyrus x bretschneideri]}	{sp|Q9LKZ3|RBR1_ARATH; Retinoblastoma-related protein 1 OS=Arabidopsis thaliana GN=RBR1 PE=1 SV=1}	{pop:POPTR_0001s06870g; K04681 RBL1 retinoblastoma-like protein 1 - ko04350; Environmental Information Processing; Signal transduction; TGF-beta signaling pathway | ko04110; Cellular Processes; Cell growth and death; Cell cycle | ko05203; Human Diseases; Cancers: Overview; Viral carcinogenesis}	{At3g12280; KOG1010 Rb (Retinoblastoma tumor suppressor)-related protein D Cell cycle control, cell division, chromosome partitioning ;}	{NA}	{XR_531484.2; PREDICTED: Malus x domestica uncharacterized LOC103450039 (LOC103450039), transcript variant X1, ncRNA}	{NA}	5.34667	4.89333	2.7	25.8233	2.34143	1.61739	0.53372	0.90017	1	FALSE	1.07642	2.42126	-1.1695	0.54037	1	FALSE	1.18469	1.76589	-0.57589	0.86627	0.97822	FALSE	9.0446	2.14314	2.0773	0.18636	0.83251	FALSE	10.1008	1.03687	3.2842	0.082862	0.66977	FALSE	9.9682	1.55393	2.6814	0.15187
MD01G1046000_novel04	MD01G1046000	Novel_lncRNA	321	1	{NA}	{NA}	{NA}	{NA}	{NA}	{XR_001790368.1; PREDICTED: Malus x domestica uncharacterized LOC103439215 (LOC103439215), transcript variant X3, ncRNA}	{NA}	137.477	69.8667	102.177	100.647	3.498	4.18853	-0.25991	0.98622	1	FALSE	4.1147	3.56636	0.20634	1	1	FALSE	4.47167	4.57986	-0.03449	1	1	FALSE	3.77341	3.15223	0.2595	0.95205	1	FALSE	4.16629	3.98579	0.063896	0.97599	1	FALSE	4.06209	4.00956	0.01878	1
MD01G1049500_novel01	MD01G1049500	Novel_lncRNA	3327	1	{NA}	{NA}	{NA}	{NA}	{NA}	{AB545982.1; Pyrus pyrifolia genes for F-box proteins and S2-RNase, complete cds, haplotype: S2}	{NA}	19.04	49.1767	61.31	66.8267	104.183	25.2832	2.0429	0.00098831	0.017985	TRUE	110.116	106.955	0.04202	0.96761	1	FALSE	120.291	27.557	2.126	0.012159	0.083613	FALSE	98.7734	94.6116	0.062106	0.8345	1	FALSE	109.52	107.128	0.031858	0.86508	1	FALSE	106.698	24.1936	2.1408	0.10121
MD01G1049600_novel01	MD01G1049600	Novel_lncRNA	488	1	{XP_008347165.1; PREDICTED: BON1-associated protein 2-like [Malus domestica]}	{NA}	{mdm:103419178; - - - - -}	{NA}	{NA}	{XM_008348943.2; PREDICTED: Malus x domestica BON1-associated protein 2-like (LOC103410198), mRNA}	{NA}	14489.4	53069.7	34146.8	33046.8	9461.79	1480.94	2.6756	0.003934	0.045912	TRUE	4858.6	9718.46	-1.0002	0.19863	1	FALSE	5314.04	1613.41	1.7197	0.075533	0.28498	FALSE	3876.95	8591.67	-1.148	0.1316	0.78651	FALSE	4314.27	4719.69	-0.12958	0.87641	1	FALSE	4229.07	1417.84	1.5766	0.029927
MD01G1051400_novel11	MD01G1051400	Novel_lncRNA	408	2	{XP_008338280.1; PREDICTED: serine/arginine-rich splicing factor RS41-like isoform X1 [Malus domestica]}	{NA}	{mdm:103401317; K12893 SFRS4_5_6 splicing factor, arginine/serine-rich 4/5/6 - ko03040; Genetic Information Processing; Transcription; Spliceosome | ko05168; Human Diseases; Infectious diseases: Viral; Herpes simplex infection}	{NA}	{NA}	{XM_008340058.2; PREDICTED: Malus x domestica serine/arginine-rich splicing factor RS41-like (LOC103401317), transcript variant X1, mRNA}	{NA}	3271.57	3507.88	4180.16	3013.95	384.408	219.307	0.80968	0.14012	0.44435	FALSE	383.009	394.615	-0.043066	0.97209	1	FALSE	417.395	239.508	0.80134	0.04975	0.22174	FALSE	234.12	349.058	-0.57622	0.37092	0.88797	FALSE	258.812	372.712	-0.52616	0.26232	0.92214	FALSE	253.097	210.028	0.26911	0.52312
MD01G1055700_novel01	MD01G1055700	Novel_lncRNA	1413	6	{NA}	{NA}	{NA}	{NA}	{NA}	{XR_666989.2; PREDICTED: Pyrus x bretschneideri uncharacterized LOC103945679 (LOC103945679), transcript variant X1, ncRNA}	{NA}	129.787	60.5167	90.4067	84.89	46.1524	65.0582	-0.49533	0.4869	0.80394	FALSE	59.6659	47.3205	0.33444	0.61718	1	FALSE	65.0093	70.9655	-0.12647	0.89173	0.99004	FALSE	46.7854	41.8698	0.16015	0.80284	1	FALSE	51.5791	58.0963	-0.17166	0.79581	1	FALSE	50.3337	62.289	-0.30745	0.64859
MD01G1055700_novel02	MD01G1055700	Novel_lncRNA	1827	5	{NA}	{NA}	{fve:101305523; K17541 SCYL2 SCY1-like protein 2 - -}	{NA}	{NA}	{XR_532169.2; PREDICTED: Malus x domestica uncharacterized LOC103455603 (LOC103455603), ncRNA}	{NA}	155.747	90.5133	81.4933	101.013	102.361	105.762	-0.04715	0.92029	1	FALSE	71.7886	105.127	-0.55031	0.36749	1	FALSE	78.2888	115.574	-0.56193	0.20324	0.51162	FALSE	76.718	92.9701	-0.2772	0.69181	0.96926	FALSE	85.0506	69.6639	0.28791	0.53879	1	FALSE	83.2355	101.299	-0.28334	0.53559
MD01G1073600_novel09	MD01G1073600	Novel_lncRNA	258	1	{XP_008362840.1; PREDICTED: BAG family molecular chaperone regulator 6 isoform X2 [Malus domestica]}	{NA}	{NA}	{NA}	{NA}	{XM_008364618.2; PREDICTED: Malus x domestica BAG family molecular chaperone regulator 6 (LOC103426524), transcript variant X2, mRNA}	{NA}	15311.2	11563.1	5027.26	3467.05	200.508	160.898	0.31752	0.60281	0.87762	FALSE	74.3311	206.07	-1.4711	0.020975	1	FALSE	80.8517	176.012	-1.1223	0.017501	0.10715	FALSE	46.2368	182.29	-1.9791	0.0015455	0.078699	FALSE	51.2462	72.2767	-0.49609	0.25076	0.92214	FALSE	50.3769	154.23	-1.6142	0.00018777
MD01G1077100	MD01G1077100	Novel_lncRNA	480	2	{ONI23367.1; hypothetical protein PRUPE_2G184600 [Prunus persica]}	{NA}	{spen:107008613; - - - - -; spen:107008613; - - - - -}	{NA}	{GO:0045156; electron transporter, transferring electrons within the cyclic electron transport pathway of photosynthesis activity; molecular_function GO:0016021; integral to membrane; cellular_component GO:0019684; photosynthesis, light reaction; biological_process GO:0030077; plasma membrane light-harvesting complex; cellular_component}	{XR_525880.2; PREDICTED: Malus x domestica uncharacterized LOC103413357 (LOC103413357), ncRNA}	{PF00556:Antenna complex alpha/beta subunit}	10912.9	2363.07	4712.04	7332.25	364.402	1067.03	-1.55	0.0075691	0.074096	FALSE	599.924	373.116	0.68515	0.32954	1	FALSE	654.093	1164.47	-0.83211	0.03094	0.15893	FALSE	811.56	330.023	1.2981	0.11758	0.77959	FALSE	893.594	580.63	0.622	0.35148	0.97406	FALSE	874.952	1021.53	-0.22346	0.61566
MD01G1080900_novel02	MD01G1080900	Novel_lncRNA	405	1	{XP_007220151.1; hypothetical protein PRUPE_ppa019679mg [Prunus persica]}	{NA}	{NA}	{NA}	{NA}	{XM_009338507.2; PREDICTED: Pyrus x bretschneideri uncharacterized LOC103929322 (LOC103929322), mRNA}	{NA}	48.0433	11.3433	29.6167	55.86	1.0477	3.13066	-1.5792	0.44538	0.77442	FALSE	2.47717	1.07835	1.1999	0.49822	1	FALSE	2.68633	3.39659	-0.33845	0.96724	1	FALSE	4.36203	0.955559	2.1906	0.20902	0.83852	FALSE	4.87564	2.41109	1.0159	0.58833	1	FALSE	4.80344	2.98894	0.68444	0.71681
MD01G1099700_novel09	MD01G1099700	Novel_lncRNA	2133	2	{NA}	{NA}	{NA}	{NA}	{NA}	{XR_668913.2; PREDICTED: Pyrus x bretschneideri dihydrolipoyllysine-residue acetyltransferase component 1 of pyruvate dehydrogenase complex, mitochondrial-like (LOC103958420), transcript variant X2, misc_RNA}	{NA}	89.09	64.7533	67.1167	53.0933	90.9225	72.6963	0.32276	0.57615	0.87244	FALSE	71.623	93.275	-0.38107	0.53212	1	FALSE	78.1173	79.4425	-0.024269	0.97682	1	FALSE	47.8738	82.4558	-0.78438	0.24161	0.85748	FALSE	53.0139	69.5865	-0.39244	0.48977	0.98512	FALSE	51.8255	69.6688	-0.42685	0.42555
MD01G1099700_novel12	MD01G1099700	Novel_lncRNA	2012	3	{XP_009368952.1; PREDICTED: dihydrolipoyllysine-residue acetyltransferase component 1 of pyruvate dehydrogenase complex, mitochondrial-like [Pyrus x bretschneideri]}	{NA}	{NA}	{NA}	{NA}	{XR_668916.2; PREDICTED: Pyrus x bretschneideri dihydrolipoyllysine-residue acetyltransferase component 1 of pyruvate dehydrogenase complex, mitochondrial-like (LOC103958435), transcript variant X2, misc_RNA}	{NA}	39.8667	40.2167	26.2567	43.32	49.7851	30.198	0.72126	0.33681	0.67152	FALSE	26.3962	51.3247	-0.95932	0.18653	1	FALSE	28.8061	33.0547	-0.19848	0.70215	0.90804	FALSE	36.5863	45.4168	-0.31192	0.75261	1	FALSE	40.4842	25.6259	0.65976	0.25431	0.92214	FALSE	39.6204	28.946	0.45288	0.43356
MD01G1132900_novel02	MD01G1132900	Novel_lncRNA	375	3	{NA}	{NA}	{NA}	{NA}	{GO:0003968; RNA-directed RNA polymerase activity; molecular_function}	{XM_008375676.2; PREDICTED: Malus x domestica high mobility group B protein 1-like (LOC103437212), transcript variant X1, mRNA}	{PF02478:Pneumovirus phosphoprotein}	18097.8	5829.34	6427.38	6930.3	512.239	961.613	-0.90864	0.083464	0.34393	FALSE	454.279	527.057	-0.21438	0.76372	1	FALSE	494.891	1049.75	-1.0849	0.0079784	0.064178	FALSE	429.294	466.317	-0.11935	0.872	1	FALSE	473.853	440.57	0.10507	0.86723	1	FALSE	464.097	920.843	-0.98853	0.039169
MD01G1136300_novel02	MD01G1136300	Novel_lncRNA	329	1	{NA}	{NA}	{NA}	{NA}	{NA}	{NA}	{NA}	1390.77	323.74	706.057	419.257	18.65	47.9623	-1.3627	0.039647	0.22258	FALSE	32.0015	19.1796	0.73857	0.29304	1	FALSE	34.8476	52.3014	-0.58579	0.26066	0.57425	FALSE	17.0215	16.9665	0.0046617	0.95781	1	FALSE	18.7042	30.9782	-0.72789	0.34718	0.97406	FALSE	18.2652	45.9209	-1.3301	0.025999
MD01G1139200_novel03	MD01G1139200	Novel_lncRNA	381	1	{NA}	{NA}	{NA}	{NA}	{NA}	{XM_009345592.2; PREDICTED: Pyrus x bretschneideri protein phosphatase 2C 37-like (LOC103935784), mRNA}	{NA}	1283.61	9988	4758.84	5942.14	1039.22	71.2387	3.8667	0.05041	0.26083	FALSE	375.052	1072.48	-1.5158	0.32647	1	FALSE	409.748	77.8927	2.3952	0.0017348	0.020356	TRUE	391.511	948.273	-1.2762	0.38229	0.88797	FALSE	435.56	364.483	0.25702	0.68203	1	FALSE	427.094	68.2492	2.6457	0.00053082
MD01G1142300_novel01	MD01G1142300	Novel_lncRNA	301	1	{NA}	{NA}	{NA}	{NA}	{NA}	{XM_008374035.2; PREDICTED: Malus x domestica glycine-rich protein A3-like (LOC103435637), mRNA}	{NA}	60757.2	24025.7	26123.6	24538.2	997.485	1451.31	-0.54098	0.26145	0.59797	FALSE	852.486	1027.21	-0.26899	0.73295	1	FALSE	928.817	1585.2	-0.7712	0.055779	0.24432	FALSE	711.296	908.498	-0.35303	0.6209	0.95614	FALSE	786.204	826.616	-0.072313	0.82914	1	FALSE	770.587	1390.39	-0.85146	0.07945
MD01G1145400_novel02	MD01G1145400	Novel_lncRNA	222	2	{NA}	{NA}	{NA}	{NA}	{NA}	{XM_008383678.2; PREDICTED: Malus x domestica 60S ribosomal protein L35a-1-like (LOC103444722), mRNA}	{NA}	3316.9	1653.89	2188.86	2968.62	9.65536	11.9897	-0.3124	0.73478	0.94544	FALSE	12.0006	9.93691	0.27223	0.7392	1	FALSE	13.0897	13.0823	0.00080927	1	1	FALSE	14.1681	8.79606	0.68772	0.48425	0.91345	FALSE	15.672	11.6735	0.42495	0.70886	1	FALSE	15.3911	11.4797	0.423	0.68104
MD01G1151200_novel01	MD01G1151200	Novel_lncRNA	435	1	{XP_017178543.1; PREDICTED: uncharacterized protein LOC108169545 [Malus domestica]}	{NA}	{NA}	{NA}	{NA}	{XM_017327962.1; PREDICTED: Malus x domestica probable inorganic phosphate transporter 1-7 (LOC103419864), partial mRNA}	{NA}	4830.47	2781.99	3513.91	2090.46	327.824	382.7	-0.22329	0.81564	0.98432	FALSE	363.897	336.32	0.11369	0.89118	1	FALSE	395.996	418.037	-0.078145	0.95134	1	FALSE	186.798	297.692	-0.67234	0.46806	0.90968	FALSE	205.386	353.741	-0.78435	0.10974	0.71555	FALSE	200.433	366.737	-0.87163	0.078137
MD01G1153000_novel03	MD01G1153000	Novel_lncRNA	261	1	{NA}	{NA}	{NA}	{NA}	{NA}	{XM_008345401.2; PREDICTED: Malus x domestica phosphoinositide phospholipase C 2-like (LOC103406415), mRNA}	{NA}	1602.34	562.45	880.79	442.833	10.0534	18.8456	-0.90655	0.42948	0.7596	FALSE	13.6582	10.3579	0.39904	0.70267	1	FALSE	14.8659	20.6238	-0.4723	0.591	0.84362	FALSE	6.21129	9.17431	-0.56271	0.79106	1	FALSE	6.77136	13.2373	-0.96709	0.35915	0.97406	FALSE	6.6024	18.0865	-1.4539	0.24232
MD01G1160900_novel01	MD01G1160900	Novel_lncRNA	315	1	{NA}	{NA}	{NA}	{NA}	{NA}	{XM_008376210.2; PREDICTED: Malus x domestica wound-induced protein 1-like (LOC103437711), partial mRNA}	{NA}	36645.2	94325.4	52561.8	23727.6	4855.83	1069.75	2.1824	0.02663	0.18058	FALSE	2189.79	5001.05	-1.1914	0.18986	1	FALSE	2388.5	1170.14	1.0294	0.029463	0.15263	FALSE	834.766	4422.36	-2.4054	0.019795	0.34606	FALSE	926.338	2131.4	-1.2022	0.018893	0.58778	FALSE	907.257	1025.62	-0.17691	0.70673
MD01G1190800_novel01	MD01G1190800	Novel_lncRNA	2446	7	{NA}	{NA}	{NA}	{NA}	{NA}	{XR_526596.2; PREDICTED: Malus x domestica uncharacterized LOC103417833 (LOC103417833), transcript variant X2, ncRNA}	{NA}	0.936667	0.543333	0.553333	0	0.888108	0.970436	-0.1279	1	1	FALSE	0.758436	0.899935	-0.24679	1	1	FALSE	0.823945	1.05953	-0.36281	1	1	FALSE	0	0.794748	#NAME?	0.54485	0.9346	FALSE	0	0.746732	#NAME?	0.60833	1	FALSE	0	0.932356	#NAME?	0.61222
MD01G1190800_novel02	MD01G1190800	Novel_lncRNA	1905	6	{NA}	{NA}	{NA}	{NA}	{NA}	{XM_008367848.2; PREDICTED: Malus x domestica wall-associated receptor kinase 2-like (LOC103429718), mRNA}	{NA}	0	0	0	0	0	0	NA	NA	NA	NA	0	0	NA	NA	NA	NA	0	0	NA	NA	NA	NA	0	0	NA	NA	NA	NA	0	0	NA	NA	NA	NA	0	0	NA	NA
MD01G1190800_novel03	MD01G1190800	Novel_lncRNA	1671	5	{NA}	{NA}	{NA}	{NA}	{NA}	{XM_008367848.2; PREDICTED: Malus x domestica wall-associated receptor kinase 2-like (LOC103429718), mRNA}	{NA}	173.723	105.89	123.107	96.1967	104.542	106.371	-0.025033	0.983	1	FALSE	99.0217	107.31	-0.11597	0.85282	1	FALSE	107.97	116.254	-0.10665	0.83	0.96331	FALSE	65.1803	94.9178	-0.54224	0.44436	0.90298	FALSE	71.9904	96.2494	-0.41897	0.4667	0.98512	FALSE	70.263	101.909	-0.53644	0.30655
MD01G1196200_novel01	MD01G1196200	Novel_lncRNA	1831	1	{NA}	{NA}	{NA}	{NA}	{NA}	{HQ445899.1; Malus x domestica cultivar Evereste fire blight resistance locus LG12, complete sequence}	{NA}	357.573	11.6933	15.52	11.6867	12.6997	244.428	-4.2665	1.946e-08	2.5437e-06	TRUE	14.7032	13.075	0.16931	0.93173	1	FALSE	16.121	266.401	-4.0466	2.8721e-08	1.7492e-06	TRUE	8.66311	11.5701	-0.41744	0.85588	1	FALSE	9.49853	14.2546	-0.58565	0.84006	1	FALSE	9.21883	233.973	-4.6656	1.4344e-08
MD01G1210300_novel01	MD01G1210300	Novel_lncRNA	284	1	{NA}	{NA}	{NA}	{NA}	{NA}	{XM_008382027.2; PREDICTED: Malus x domestica probable NADH dehydrogenase [ubiquinone] 1 alpha subcomplex subunit 5, mitochondrial (LOC103443218), mRNA}	{NA}	2187.72	1027.46	1801.85	2110.22	30.2968	38.7895	-0.3565	0.60634	0.87762	FALSE	44.8013	31.102	0.52653	0.44348	1	FALSE	48.7954	42.3175	0.20549	0.71122	0.91056	FALSE	46.884	27.5128	0.76899	0.31096	0.86303	FALSE	51.7824	43.4539	0.25298	0.76405	1	FALSE	50.8065	37.1207	0.45279	0.52483
MD01G1210400_novel03	MD01G1210400	Novel_lncRNA	226	1	{NA}	{NA}	{NA}	{NA}	{NA}	{XM_008382038.2; PREDICTED: Malus x domestica protein SGT1 homolog (LOC103443227), mRNA}	{NA}	0	0	0	0	0	0	NA	NA	NA	NA	0	0	NA	NA	NA	NA	0	0	NA	NA	NA	NA	0	0	NA	NA	NA	NA	0	0	NA	NA	NA	NA	0	0	NA	NA
MD02G1002800_novel02	MD02G1002800	Novel_lncRNA	278	1	{NA}	{NA}	{NA}	{NA}	{NA}	{XM_017327478.1; PREDICTED: Malus x domestica 60S ribosomal protein L2, mitochondrial-like (LOC108171405), mRNA}	{NA}	3018.53	2273.52	3417.35	2191.32	58.2049	47.6137	0.28976	0.59128	0.87704	FALSE	79.5959	59.686	0.4153	0.54177	1	FALSE	86.7773	51.925	0.74089	0.11678	0.37719	FALSE	43.7789	52.8089	-0.27054	0.62391	0.95614	FALSE	48.3246	77.3898	-0.67939	0.16981	0.85039	FALSE	47.3069	45.5515	0.054552	0.96015
MD02G1003200_novel03	MD02G1003200	Novel_lncRNA	362	1	{NA}	{NA}	{NA}	{NA}	{NA}	{XM_008385783.2; PREDICTED: Malus x domestica LETM1 and EF-hand domain-containing protein 1, mitochondrial (LOC103446648), transcript variant X1, mRNA}	{NA}	475.023	227.72	204.183	904.093	16.8077	22.7071	-0.43402	0.63404	0.89635	FALSE	13.0159	17.224	-0.40414	0.53698	1	FALSE	14.1882	24.7909	-0.80512	0.22846	0.54329	FALSE	51.1359	15.2406	1.7464	0.022369	0.36814	FALSE	56.7585	12.6098	2.1703	0.0016951	0.17842	FALSE	55.7608	21.7476	1.3584	0.029314
MD02G1017600_novel03	MD02G1017600	Novel_lncRNA	377	1	{XP_008354345.1; PREDICTED: uncharacterized protein LOC103417966 [Malus domestica]}	{NA}	{NA}	{NA}	{NA}	{XM_008356124.2; PREDICTED: Malus x domestica uncharacterized LOC103417967 (LOC103417967), mRNA}	{NA}	29639.1	16777.4	21934.4	22599.4	1500.38	1595.65	-0.088809	0.86501	0.99321	FALSE	1641.39	1540.88	0.091162	0.86092	1	FALSE	1790.57	1742.86	0.038965	0.92716	1	FALSE	1445.46	1362.93	0.084823	0.9228	1	FALSE	1607.84	1595.49	0.011124	0.95104	1	FALSE	1576.85	1528.1	0.045307	1
MD02G1018600_novel01	MD02G1018600	Novel_lncRNA	377	1	{NA}	{NA}	{NA}	{NA}	{NA}	{XM_008364661.1; PREDICTED: Malus x domestica phosphopantothenoylcysteine decarboxylase subunit VHS3-like (LOC103426572), mRNA}	{NA}	8128.3	2093.2	2673.51	2389.32	182.081	435.395	-1.2577	0.024474	0.16816	FALSE	193.95	187.003	0.052619	0.91733	1	FALSE	211.249	475.911	-1.1717	0.0061273	0.051899	FALSE	150.146	165.45	-0.14003	0.82547	1	FALSE	165.661	188.398	-0.18555	0.67949	1	FALSE	162.051	416.964	-1.3635	0.0029759
MD02G1033200_novel01	MD02G1033200	Novel_lncRNA	468	1	{XP_008362904.1; PREDICTED: probable sugar phosphate/phosphate translocator At4g32390 [Malus domestica]}	{NA}	{pper:PRUPE_ppa008106mg; - - - - -}	{NA}	{NA}	{XM_008345718.2; PREDICTED: Malus x domestica probable sugar phosphate/phosphate translocator At4g32390 (LOC103406727), mRNA}	{NA}	936.69	213.097	421.767	935.183	31.5309	86.9499	-1.4634	0.023041	0.16134	FALSE	51.1271	32.3374	0.66089	0.31887	1	FALSE	55.6353	94.8101	-0.76904	0.12776	0.39758	FALSE	98.9645	28.6054	1.7906	0.0089295	0.22289	FALSE	109.32	49.6813	1.1378	0.031978	0.5962	FALSE	107.112	83.2275	0.36399	0.46278
MD02G1064800_novel11	MD02G1064800	Novel_lncRNA	307	2	{XP_017187871.1; PREDICTED: NADP-dependent malic enzyme-like [Malus domestica]}	{sp|P34105|MAOX_POPTR; NADP-dependent malic enzyme OS=Populus trichocarpa PE=2 SV=3}	{mdm:103420136; K00029 E1.1.1.40, maeB malate dehydrogenase (oxaloacetate-decarboxylating)(NADP+) 1.1.1.40 ko01200; Metabolism; Global and overview maps; Carbon metabolism | ko00620; Metabolism; Carbohydrate metabolism; Pyruvate metabolism | ko00710; Metabolism; Energy metabolism; Carbon fixation in photosynthetic organisms}	{At5g25880; KOG1257 NADP+-dependent malic enzyme C Energy production and conversion ;}	{NA}	{XM_008345776.1; PREDICTED: Malus x domestica NADP-dependent malic enzyme-like (LOC103406786), mRNA}	{NA}	9036.61	5810.95	8176.13	7381.9	250.649	233.538	0.10201	0.85731	0.98974	FALSE	295.438	257.343	0.19917	0.72218	1	FALSE	321.888	255.206	0.3349	0.42114	0.72156	FALSE	232.074	227.614	0.027999	0.96548	1	FALSE	256.371	287.015	-0.16289	0.71645	1	FALSE	250.842	223.709	0.16516	0.72065
MD02G1064800_novel12	MD02G1064800	Novel_lncRNA	284	1	{XP_008343998.1; PREDICTED: NADP-dependent malic enzyme-like [Malus domestica]}	{sp|P34105|MAOX_POPTR; NADP-dependent malic enzyme OS=Populus trichocarpa PE=2 SV=3}	{mdm:103420136; K00029 E1.1.1.40, maeB malate dehydrogenase (oxaloacetate-decarboxylating)(NADP+) 1.1.1.40 ko01200; Metabolism; Global and overview maps; Carbon metabolism | ko00620; Metabolism; Carbohydrate metabolism; Pyruvate metabolism | ko00710; Metabolism; Energy metabolism; Carbon fixation in photosynthetic organisms}	{At5g25880; KOG1257 NADP+-dependent malic enzyme C Energy production and conversion ;}	{NA}	{XM_008345776.1; PREDICTED: Malus x domestica NADP-dependent malic enzyme-like (LOC103406786), mRNA}	{NA}	7022.36	4419.29	6950.25	5270.08	130.274	126.223	0.045568	0.93066	1	FALSE	176.676	133.802	0.40101	0.49202	1	FALSE	192.505	137.809	0.48223	0.26115	0.57425	FALSE	117.09	118.374	-0.015732	0.97767	1	FALSE	129.097	171.626	-0.41081	0.42342	0.98512	FALSE	126.095	120.879	0.060939	0.81413
MD02G1070500_novel15	MD02G1070500	Novel_lncRNA	1897	1	{NA}	{NA}	{NA}	{NA}	{NA}	{XM_017324553.1; PREDICTED: Malus x domestica putative disease resistance protein RGA3 (LOC108170051), mRNA}	{NA}	83.0133	10.0133	21.4133	10.63	10.5678	59.56	-2.4947	0.010027	0.090693	FALSE	18.9874	10.8676	0.80501	0.33042	1	FALSE	20.6244	65.0853	-1.658	0.063699	0.26461	FALSE	8.1494	9.62067	-0.23944	0.93435	1	FALSE	8.90749	18.4536	-1.0508	0.30255	0.95378	FALSE	8.66693	57.1172	-2.7203	0.010058
MD02G1072800_novel03	MD02G1072800	Novel_lncRNA	292	1	{XP_008344008.1; PREDICTED: 60S ribosomal protein L28-1-like [Malus domestica]}	{NA}	{pxb:103943951; K02903 RP-L28e, RPL28 large subunit ribosomal protein L28e - ko03010; Genetic Information Processing; Translation; Ribosome}	{NA}	{NA}	{XM_008345787.2; PREDICTED: Malus x domestica 60S ribosomal protein L28-1-like (LOC103406798), transcript variant X2, mRNA}	{NA}	21480	6794.85	10512	13571.3	222.588	438.136	-0.977	0.091644	0.35708	FALSE	301.213	228.318	0.39974	0.53839	1	FALSE	328.101	478.381	-0.54402	0.19329	0.50453	FALSE	342.539	202.026	0.76172	0.26841	0.85852	FALSE	377.579	292.385	0.36891	0.47928	0.98512	FALSE	369.686	419.448	-0.18219	0.6478
MD02G1106900_novel01	MD02G1106900	Novel_lncRNA	1067	4	{NA}	{NA}	{NA}	{NA}	{NA}	{XR_531977.2; PREDICTED: Malus x domestica uncharacterized LOC103454298 (LOC103454298), transcript variant X2, ncRNA}	{NA}	188.06	119.1	111.38	159.12	70.5813	65.5975	0.10564	0.89971	1	FALSE	53.1628	72.5009	-0.44758	0.50052	1	FALSE	58.0679	71.6398	-0.30302	0.52157	0.7938	FALSE	62.5359	64.112	-0.035909	1	1	FALSE	69.2564	51.7397	0.42068	0.40854	0.98512	FALSE	67.7683	62.7999	0.10985	0.83046
MD02G1106900_novel02	MD02G1106900	Novel_lncRNA	1409	3	{NA}	{NA}	{NA}	{NA}	{NA}	{XR_001951592.1; PREDICTED: Pyrus x bretschneideri uncharacterized LOC103929701 (LOC103929701), transcript variant X2, ncRNA}	{NA}	29.55	31.0867	38.1433	22.0967	23.9929	14.8761	0.68961	0.34773	0.68264	FALSE	24.8609	24.6401	0.01287	0.98539	1	FALSE	27.0712	16.2498	0.73634	0.25165	0.56665	FALSE	12.2024	21.804	-0.83743	0.24824	0.85748	FALSE	13.487	24.1725	-0.8418	0.18456	0.86228	FALSE	13.2319	14.2435	-0.10628	0.82749
MD02G1113800_novel06	MD02G1113800	Novel_lncRNA	379	1	{NA}	{NA}	{NA}	{NA}	{NA}	{XM_008356383.2; PREDICTED: Malus x domestica protein PIN-LIKES 5-like (LOC103418248), mRNA}	{NA}	85.3133	70.6433	174.373	553.63	6.86719	4.71008	0.54397	0.60562	0.87762	FALSE	13.3537	7.03318	0.92499	0.42555	1	FALSE	14.6097	5.12419	1.5115	0.14567	0.4283	FALSE	35.8603	6.21493	2.5286	0.0035815	0.13816	FALSE	39.8658	12.9237	1.6251	0.033446	0.5962	FALSE	39.19	4.50622	3.1205	0.00092975
MD02G1153600_novel01	MD02G1153600	Novel_lncRNA	2354	3	{NA}	{NA}	{NA}	{NA}	{NA}	{HE805491.1; Malus x robusta DNA fragment spanning resistance locus against Erwinia amylovora on linkage group 3, clone 16k15 contig2/4}	{NA}	7.08333	29.5233	40.4333	22.0767	42.9716	6.34875	2.7588	0.00031827	0.0081349	TRUE	48.1293	44.2486	0.12128	0.75118	1	FALSE	52.4523	6.91692	2.9228	6.5541e-06	0.00021267	TRUE	22.2993	39.1543	-0.81217	0.28329	0.86303	FALSE	24.7107	46.8225	-0.92207	0.10508	0.71555	FALSE	24.1906	6.06614	1.9956	0.0070344
MD02G1166800_novel01	MD02G1166800	Novel_lncRNA	2479	2	{NA}	{NA}	{NA}	{NA}	{NA}	{XM_008341555.2; PREDICTED: Malus x domestica protein misato homolog 1-like (LOC103402796), mRNA}	{NA}	47.3167	51.61	76.3167	30.8067	83.5811	45.799	0.86786	0.19351	0.5206	FALSE	97.385	86.1548	0.17677	0.59574	1	FALSE	106.088	50.0043	1.0851	0.078352	0.29047	FALSE	32.8247	76.2177	-1.2153	0.10304	0.73696	FALSE	36.3101	94.9683	-1.3871	0.053704	0.635	FALSE	35.464	43.8877	-0.30746	0.66847
MD02G1182800_novel01	MD02G1182800	Novel_lncRNA	614	2	{NA}	{NA}	{NA}	{NA}	{NA}	{XR_524247.2; PREDICTED: Malus x domestica uncharacterized LOC103403857 (LOC103403857), ncRNA}	{NA}	1155.22	1177.3	1020.68	1513.64	323.798	179.099	0.85433	0.2859	0.63004	FALSE	208.75	333.623	-0.67644	0.40272	1	FALSE	227.578	195.484	0.21931	0.63752	0.87394	FALSE	266.174	295.041	-0.14855	0.924	1	FALSE	294.603	202.596	0.54017	0.25835	0.92214	FALSE	288.461	171.441	0.75066	0.10198
MD02G1203600_novel01	MD02G1203600	Novel_lncRNA	741	2	{NA}	{NA}	{NA}	{NA}	{NA}	{XR_001786994.1; PREDICTED: Malus x domestica uncharacterized LOC103408788 (LOC103408788), transcript variant X3, ncRNA}	{NA}	187.733	134.783	127.727	112.027	46.3401	39.5109	0.23001	0.76179	0.96637	FALSE	35.6488	47.6392	-0.4183	0.59767	1	FALSE	38.839	43.2079	-0.15379	0.83771	0.967	FALSE	26.3978	42.1426	-0.67486	0.40003	0.89339	FALSE	29.1685	34.7008	-0.25056	0.737	1	FALSE	28.4629	37.8628	-0.4117	0.54825
MD02G1232400	MD02G1232400	Novel_lncRNA	706	3	{NA}	{NA}	{NA}	{NA}	{NA}	{XM_009378021.1; PREDICTED: Pyrus x bretschneideri keratin-associated protein 19-2-like (LOC103965005), mRNA}	{NA}	12708.4	2547.68	647.803	636.14	790.424	2478.42	-1.6487	0.0037175	0.045247	TRUE	159.524	810.709	-2.3454	7.5685e-05	0.096574	FALSE	173.645	2710.7	-3.9645	3.5684e-18	1.141e-15	TRUE	138.632	717.134	-2.371	0.00034601	0.029365	TRUE	152.881	154.468	-0.014897	0.96805	1	FALSE	149.42	2374.82	-3.9904	6.2997e-12
MD02G1247500	MD02G1247500	Novel_lncRNA	836	2	{NA}	{NA}	{NA}	{NA}	{NA}	{XR_524727.2; PREDICTED: Malus x domestica uncharacterized LOC103407284 (LOC103407284), ncRNA}	{NA}	116.977	34.6067	73.7067	84.3333	13.8018	29.1945	-1.0808	0.12013	0.4105	FALSE	23.8887	14.1868	0.75178	0.33143	1	FALSE	26.0418	31.9844	-0.29654	0.56618	0.82301	FALSE	23.5745	12.5524	0.90926	0.19903	0.83251	FALSE	25.9974	23.1472	0.16753	0.69084	1	FALSE	25.3619	27.9777	-0.14161	0.89206
MD02G1249900_novel12	MD02G1249900	Novel_lncRNA	330	2	{NA}	{NA}	{NA}	{NA}	{NA}	{XR_001789030.1; PREDICTED: Malus x domestica replication factor A 51 kDa subunit-like (LOC103427096), transcript variant X2, misc_RNA}	{NA}	440.783	634.62	705.437	587.4	37.874	15.2904	1.3086	0.069706	0.31367	FALSE	33.68	38.9764	-0.21071	0.81302	1	FALSE	36.7282	16.6989	1.1371	0.072098	0.28461	FALSE	24.5731	34.4745	-0.48845	0.49432	0.91345	FALSE	27.2748	32.6643	-0.26015	0.6253	1	FALSE	26.7677	14.6445	0.87013	0.21716
MD02G1259200_novel11	MD02G1259200	Novel_lncRNA	339	1	{NA}	{NA}	{NA}	{NA}	{NA}	{XM_017336475.1; PREDICTED: Malus x domestica inactive poly [ADP-ribose] polymerase RCD1-like (LOC103410385), mRNA}	{NA}	5757.03	4192.06	5712.14	7027.63	269.618	218.384	0.30405	0.60935	0.87812	FALSE	302.421	276.99	0.12672	0.80597	1	FALSE	329.693	238.43	0.46756	0.28009	0.59409	FALSE	322.199	244.99	0.39523	0.55688	0.93548	FALSE	357.308	293.75	0.28258	0.63039	1	FALSE	350.4	209.047	0.74518	0.13141
MD02G1264200_novel06	MD02G1264200	Novel_lncRNA	2215	1	{XP_017179757.1; PREDICTED: uncharacterized protein LOC103405905 isoform X3 [Malus domestica]}	{NA}	{NA}	{NA}	{NA}	{XR_524751.2; PREDICTED: Malus x domestica uncharacterized LOC103407308 (LOC103407308), ncRNA}	{NA}	317.227	207.587	259.77	163.087	284.001	268.368	0.08168	0.90259	1	FALSE	287.97	291.722	-0.018673	0.98717	1	FALSE	313.83	293.304	0.097584	0.79304	0.94079	FALSE	152.453	258.05	-0.75929	0.27079	0.8618	FALSE	168.267	280.051	-0.73494	0.1443	0.78839	FALSE	164.233	257.049	-0.6463	0.18805
MD02G1264600_novel01	MD02G1264600	Novel_lncRNA	1579	3	{XP_009369943.1; PREDICTED: DNA-directed RNA polymerases II, IV and V subunit 9A [Pyrus x bretschneideri]}	{sp|Q8L5V0|RPB9B_ARATH; DNA-directed RNA polymerases II, IV and V subunit 9B OS=Arabidopsis thaliana GN=NRPB9B PE=1 SV=1}	{mdm:103452784; K03017 RPB9, POLR2I DNA-directed RNA polymerase II subunit RPB9 - ko00230; Metabolism; Nucleotide metabolism; Purine metabolism | ko00240; Metabolism; Nucleotide metabolism; Pyrimidine metabolism | ko03020; Genetic Information Processing; Transcription; RNA polymerase | ko05016; Human Diseases; Neurodegenerative diseases; Huntington's disease | ko05169; Human Diseases; Infectious …	{At3g16980; KOG2691 RNA polymerase II subunit 9 K Transcription ;}	{NA}	{XR_524756.2; PREDICTED: Malus x domestica NADP-dependent D-sorbitol-6-phosphate dehydrogenase-like (LOC103407312), transcript variant X2, misc_RNA}	{NA}	21.7933	1.19667	0.886667	2.16	1.21172	12.5212	-3.3692	0.0038921	0.045912	TRUE	0.586368	1.25472	-1.0975	0.87672	1	FALSE	0.635096	13.6938	-4.4304	0.00028639	0.0050178	TRUE	1.36465	1.11024	0.29766	0.97034	1	FALSE	1.50527	0.56618	1.4107	0.63265	1	FALSE	1.47447	12.003	-3.0251	0.004424
MD02G1268500_novel02	MD02G1268500	Novel_lncRNA	307	1	{XP_017185493.1; PREDICTED: uncharacterized protein LOC108172443 [Malus domestica]}	{NA}	{pxb:103946165; - - - - -}	{NA}	{NA}	{XM_018647177.1; PREDICTED: Pyrus x bretschneideri uncharacterized LOC103946165 (LOC103946165), mRNA}	{NA}	533.13	336.037	304.747	604.527	14.7232	13.711	0.10276	0.92914	1	FALSE	11.3312	15.1134	-0.41553	0.49871	1	FALSE	12.4125	14.9713	-0.2704	0.59706	0.84554	FALSE	19.1	13.3648	0.51513	0.57845	0.94193	FALSE	21.1535	10.9325	0.95228	0.16554	0.83887	FALSE	20.7561	13.1273	0.66097	0.40336
MD02G1278600_novel01	MD02G1278600	Novel_lncRNA	252	1	{XP_020113716.1; peptidyl-prolyl cis-trans isomerase CYP22 [Ananas comosus]}	{sp|Q9ZVJ4|CYP22_ARATH; Peptidyl-prolyl cis-trans isomerase CYP22 OS=Arabidopsis thaliana GN=CYP22 PE=2 SV=1}	{jcu:105631241; K09567 PPIH, CYPH peptidyl-prolyl isomerase H (cyclophilin H) 5.2.1.8 ko03040; Genetic Information Processing; Transcription; Spliceosome}	{At2g38730; KOG0879 U-snRNP-associated cyclophilin type peptidyl-prolyl cis-trans isomerase O Posttranslational modification, protein turnover, chaperones ;}	{NA}	{XM_008349713.2; PREDICTED: Malus x domestica peptidyl-prolyl cis-trans isomerase CYP22 (LOC103411062), mRNA}	{NA}	1222.11	983.99	631.233	1002.97	15.0513	10.7123	0.49062	0.5946	0.87704	FALSE	8.39648	15.4661	-0.88126	0.34352	1	FALSE	9.14974	11.6689	-0.35087	0.72856	0.91806	FALSE	11.5307	13.6741	-0.24597	0.80607	1	FALSE	12.6923	8.16884	0.63575	0.5022	0.98512	FALSE	12.4238	10.2419	0.27862	0.77267
MD02G1283300_novel01	MD02G1283300	Novel_lncRNA	251	1	{NA}	{NA}	{NA}	{NA}	{NA}	{XM_008349836.2; PREDICTED: Malus x domestica thioredoxin-like protein CITRX, chloroplastic (LOC103411185), mRNA}	{NA}	374.943	322.96	308.107	365.297	4.62647	3.03984	0.60591	0.70121	0.93316	FALSE	4.15008	4.75899	-0.19752	0.95045	1	FALSE	4.53212	3.30069	0.45742	0.76754	0.93673	FALSE	4.09032	4.21197	-0.042281	1	1	FALSE	4.49072	4.03668	0.15378	0.98391	1	FALSE	4.39499	2.89866	0.60047	0.72986
MD02G1289200_novel01	MD02G1289200	Novel_lncRNA	418	1	{NA}	{NA}	{NA}	{NA}	{NA}	{XM_008350087.2; PREDICTED: Malus x domestica uncharacterized protein At5g39865-like (LOC103411453), mRNA}	{NA}	645.84	313.297	440.553	651.843	37.3568	45.6695	-0.28986	0.67179	0.91956	FALSE	42.0269	38.3403	0.13245	0.84901	1	FALSE	45.7915	49.7585	-0.11986	0.84427	0.96845	FALSE	53.9492	33.9062	0.67005	0.34516	0.87353	FALSE	59.7714	40.8191	0.55021	0.35533	0.97406	FALSE	58.597	43.6745	0.42404	0.4523
MD02G1297100	MD02G1297100	Novel_lncRNA	1049	2	{NA}	{NA}	{NA}	{NA}	{NA}	{XM_009369816.2; PREDICTED: Pyrus x bretschneideri pentatricopeptide repeat-containing protein At4g20740 (LOC103957633), transcript variant X2, mRNA}	{NA}	296.023	158.283	246.083	202.383	88.0478	101.349	-0.20297	0.73365	0.94544	FALSE	107.439	90.369	0.24962	0.67308	1	FALSE	116.901	110.812	0.077177	0.85047	0.97122	FALSE	78.1721	79.9306	-0.032095	0.94289	1	FALSE	86.7744	104.303	-0.26544	0.53302	1	FALSE	85.0131	97.0815	-0.19151	0.62678
MD02G1299500_novel01	MD02G1299500	Novel_lncRNA	622	4	{NA}	{NA}	{NA}	{NA}	{NA}	{XM_017327644.1; PREDICTED: Malus x domestica acyl-CoA--sterol O-acyltransferase 1-like (LOC103418576), mRNA}	{NA}	60.9767	68.58	80.02	40.3133	17.2183	9.63301	0.83789	0.3173	0.662	FALSE	16.201	17.5626	-0.11642	0.76514	1	FALSE	17.6296	10.5341	0.74293	0.34354	0.66562	FALSE	7.29694	15.5261	-1.0893	0.359	0.88568	FALSE	8.09809	15.711	-0.95612	0.33558	0.97015	FALSE	7.8863	9.22562	-0.2263	0.95518
MD02G1302500_novel01	MD02G1302500	Novel_lncRNA	952	3	{XP_017185674.1; PREDICTED: ribulose bisphosphate carboxylase/oxygenase activase, chloroplastic-like [Malus domestica]}	{NA}	{NA}	{NA}	{NA}	{XR_001786497.1; PREDICTED: Malus x domestica uncharacterized LOC103407467 (LOC103407467), transcript variant X2, ncRNA}	{NA}	197.823	257.223	287.39	264.33	127.05	59.6683	1.0904	0.071207	0.31598	FALSE	112.901	130.538	-0.20941	0.75379	1	FALSE	123.05	65.299	0.91411	0.050246	0.22314	FALSE	88.8561	115.465	-0.37791	0.64169	0.95614	FALSE	98.1986	109.625	-0.15881	0.8598	1	FALSE	95.8338	57.1965	0.74461	0.082012
MD02G1306400_novel01	MD02G1306400	Novel_lncRNA	1712	4	{NA}	{NA}	{NA}	{NA}	{GO:0016627; oxidoreductase activity, acting on the CH-CH group of donors; molecular_function}	{XM_008351492.2; PREDICTED: Malus x domestica uncharacterized LOC103412986 (LOC103412986), mRNA}	{PF01127:Succinate dehydrogenase/Fumarate reductase transmembrane subunit}	422.077	236.67	397.477	401.29	242.547	265.066	-0.12809	0.78006	0.97188	FALSE	325.143	249.279	0.38331	0.5004	1	FALSE	354.5	289.683	0.29131	0.52681	0.79738	FALSE	282.426	220.509	0.35704	0.52156	0.9299	FALSE	313.231	315.561	-0.010691	0.97125	1	FALSE	306.403	253.846	0.27148	0.53669
MD02G1319300_novel12	MD02G1319300	Novel_lncRNA	377	1	{NA}	{NA}	{NA}	{NA}	{NA}	{KT962099.1; Pyrus betulifolia citrate synthase 1 (CS1) mRNA, complete cds}	{NA}	1145.13	931.01	1308.02	2793.82	84.4923	61.7244	0.45298	0.38241	0.72383	FALSE	97.8492	86.4735	0.1783	0.97097	1	FALSE	106.979	67.3382	0.66783	0.33952	0.66195	FALSE	177.512	76.4411	1.2155	0.088236	0.71163	FALSE	196.921	94.7268	1.0558	0.065978	0.64311	FALSE	193.385	59.0882	1.7105	0.0038994
MD03G1006100_novel01	MD03G1006100	Novel_lncRNA	2619	1	{XP_008351623.1; PREDICTED: constitutive photomorphogenesis protein 10 isoform X1 [Malus domestica]}	{sp|Q9LJD7|COP10_ARATH; Constitutive photomorphogenesis protein 10 OS=Arabidopsis thaliana GN=COP10 PE=1 SV=1}	{pxb:103964458; K20217 UBE2E ubiquitin-conjugating enzyme E2 E 2.3.2.23 ko04120; Genetic Information Processing; Folding, sorting and degradation; Ubiquitin mediated proteolysis}	{At3g13550; KOG0417 Ubiquitin-protein ligase O Posttranslational modification, protein turnover, chaperones ;}	{NA}	{XM_008353406.2; PREDICTED: Malus x domestica constitutive photomorphogenesis protein 10 (LOC103415035), transcript variant X2, mRNA}	{NA}	220.663	137.767	196.32	152.517	229.148	225.257	0.024713	0.97621	1	FALSE	259.729	235.306	0.14247	0.79346	1	FALSE	283.006	246.158	0.20125	0.6332	0.87394	FALSE	173.093	208.126	-0.26591	0.68883	0.96893	FALSE	191.655	252.312	-0.39669	0.39804	0.98512	FALSE	187.533	215.756	-0.20225	0.65167
MD03G1019400_novel01	MD03G1019400	Novel_lncRNA	2753	5	{XP_017185794.1; PREDICTED: uncharacterized protein LOC103428056 isoform X2 [Malus domestica]}	{sp|Q9LU14|APG2_ARATH; GDSL esterase/lipase APG OS=Arabidopsis thaliana GN=APG PE=2 SV=1}	{jcu:105631699; - - - - -}	{NA}	{NA}	{XR_001786330.1; PREDICTED: Malus x domestica uncharacterized LOC108169976 (LOC108169976), ncRNA}	{NA}	364.997	230.987	254.653	224.287	407.124	392.899	0.051309	0.95304	1	FALSE	359	418.203	-0.22022	0.73976	1	FALSE	391.294	429.389	-0.13403	0.75726	0.92772	FALSE	267.107	369.9	-0.46972	0.50879	0.92133	FALSE	294.972	348.968	-0.24252	0.65941	1	FALSE	288.137	376.285	-0.38507	0.44639
MD03G1019400_novel02	MD03G1019400	Novel_lncRNA	971	2	{XP_008375835.1; PREDICTED: GDSL esterase/lipase APG-like [Malus domestica]}	{sp|Q9LU14|APG2_ARATH; GDSL esterase/lipase APG OS=Arabidopsis thaliana GN=APG PE=2 SV=1}	{var:108320476; - - - - -}	{NA}	{NA}	{XR_001951605.1; PREDICTED: Pyrus x bretschneideri uncharacterized LOC108865743 (LOC108865743), transcript variant X5, ncRNA}	{NA}	145.88	127.783	161.383	126.12	62.1686	45.2127	0.45946	0.41132	0.74669	FALSE	64.5371	63.7006	0.018823	0.97758	1	FALSE	70.2788	49.4184	0.50804	0.29185	0.60893	FALSE	43.7804	56.3478	-0.36407	0.53485	0.93142	FALSE	48.4763	62.6877	-0.3709	0.46899	0.98512	FALSE	47.4397	43.3074	0.13148	0.81961
MD03G1019400_novel03	MD03G1019400	Novel_lncRNA	600	2	{XP_009337919.1; PREDICTED: GDSL esterase/lipase APG-like [Pyrus x bretschneideri]}	{sp|Q9LU14|APG2_ARATH; GDSL esterase/lipase APG OS=Arabidopsis thaliana GN=APG PE=2 SV=1}	{jcu:105631699; - - - - -}	{NA}	{NA}	{XR_001789018.1; PREDICTED: Malus x domestica uncharacterized LOC103427051 (LOC103427051), transcript variant X3, ncRNA}	{NA}	259.96	295.057	264.4	215.717	76.8682	38.9022	0.98253	0.22	0.54384	FALSE	52.0875	79.235	-0.6052	0.47529	1	FALSE	56.7348	42.5519	0.41501	0.37784	0.68842	FALSE	36.4231	70.0823	-0.9442	0.24648	0.85748	FALSE	40.3602	50.6549	-0.32777	0.54698	1	FALSE	39.4777	37.3032	0.081737	0.85815
MD03G1019400_novel04	MD03G1019400	Novel_lncRNA	541	2	{KYP54117.1; GDSL esterase/lipase APG [Cajanus cajan]}	{sp|Q9LU14|APG2_ARATH; GDSL esterase/lipase APG OS=Arabidopsis thaliana GN=APG PE=2 SV=1}	{cmo:103489985; - - - - -}	{NA}	{NA}	{XR_001789018.1; PREDICTED: Malus x domestica uncharacterized LOC103427051 (LOC103427051), transcript variant X3, ncRNA}	{NA}	138.94	138.717	110.12	87.9267	30.1557	17.0792	0.82019	0.28196	0.62725	FALSE	18.1529	30.9917	-0.77168	0.3311	1	FALSE	19.767	18.6526	0.083711	0.91683	1	FALSE	12.4823	27.4019	-1.1344	0.17082	0.81275	FALSE	13.8391	17.6564	-0.35145	0.67858	1	FALSE	13.5177	16.3374	-0.27333	0.75914
MD03G1020100_novel01	MD03G1020100	Novel_lncRNA	1197	2	{NA}	{NA}	{NA}	{NA}	{NA}	{NA}	{NA}	58.8067	26.8867	34.48	34.6067	17.8419	23.8076	-0.41615	0.58046	0.87244	FALSE	17.889	18.3177	-0.034159	0.97725	1	FALSE	19.4838	25.9525	-0.4136	0.51964	0.7938	FALSE	16.0522	16.2016	-0.013361	0.9453	1	FALSE	17.9233	17.3424	0.047538	0.99288	1	FALSE	17.6162	22.7699	-0.37022	0.50622
MD03G1024100_novel03	MD03G1024100	Novel_lncRNA	287	1	{NA}	{NA}	{NA}	{NA}	{NA}	{XM_017327668.1; PREDICTED: Malus x domestica zinc finger A20 and AN1 domain-containing stress-associated protein 8-like (LOC103418673), transcript variant X4, mRNA}	{NA}	10672.9	12463.5	14563.8	15355.2	401.275	199.747	1.0064	0.083893	0.34393	FALSE	396.451	412.528	-0.05735	0.98718	1	FALSE	432.248	218.251	0.98587	0.020838	0.12115	FALSE	360.262	364.855	-0.018277	0.9798	1	FALSE	399.187	385.348	0.050902	0.9373	1	FALSE	390.788	191.27	1.0308	0.026363
MD03G1034100	MD03G1034100	Novel_lncRNA	1370	4	{NA}	{NA}	{NA}	{NA}	{NA}	{XR_666085.2; PREDICTED: Pyrus x bretschneideri uncharacterized LOC103939185 (LOC103939185), ncRNA}	{NA}	4.51	1.83333	6.64333	11.03	1.29054	2.16688	-0.74765	0.83245	0.98598	FALSE	4.03396	1.31886	1.6129	0.31763	1	FALSE	4.38587	2.3567	0.8961	0.47612	0.77314	FALSE	5.9329	1.16687	2.3461	0.13075	0.78651	FALSE	6.57103	3.91743	0.74621	0.59475	1	FALSE	6.44941	2.0709	1.6389	0.17614
MD03G1045600_novel15	MD03G1045600	Novel_lncRNA	289	1	{NA}	{NA}	{NA}	{NA}	{NA}	{XM_008393897.2; PREDICTED: Malus x domestica putative pentatricopeptide repeat-containing protein At3g13770, mitochondrial (LOC103454290), mRNA}	{NA}	0	0	12.3633	0	0	0	NA	NA	NA	NA	0.293184	0	Inf	1	1	FALSE	0.317548	0	Inf	1	1	FALSE	0	0	NA	NA	NA	NA	0	0.28309	#NAME?	1	1	FALSE	0	0	NA	NA
MD03G1045600_novel16	MD03G1045600	Novel_lncRNA	452	1	{NA}	{NA}	{NA}	{NA}	{NA}	{XM_008357592.2; PREDICTED: Malus x domestica peroxisome biogenesis protein 5-like (LOC103419492), partial mRNA}	{NA}	2029.34	1637.17	1875.31	2249.04	238.628	173.639	0.45868	0.42501	0.75778	FALSE	216.523	245.048	-0.17854	0.78672	1	FALSE	236.05	189.53	0.31666	0.46445	0.76353	FALSE	222.717	216.693	0.039554	0.964	1	FALSE	246.841	210.369	0.23066	0.67728	1	FALSE	241.866	166.22	0.54111	0.25405
MD03G1045900_novel06	MD03G1045900	Novel_lncRNA	252	2	{NA}	{NA}	{NA}	{NA}	{NA}	{XM_008355910.2; PREDICTED: Malus x domestica CBS domain-containing protein CBSX3, mitochondrial-like (LOC103417731), transcript variant X4, mRNA}	{NA}	13738.2	4045.56	10375.7	9008.13	56.8483	121.914	-1.1007	0.085396	0.34646	FALSE	130.496	58.2114	1.1646	0.093506	1	FALSE	142.042	133.07	0.094128	0.84939	0.97122	FALSE	103.703	51.5056	1.0097	0.12892	0.78374	FALSE	114.459	126.496	-0.14426	0.83455	1	FALSE	111.815	116.695	-0.061627	0.96482
MD03G1070200_novel11	MD03G1070200	Novel_lncRNA	300	1	{NA}	{NA}	{NA}	{NA}	{NA}	{XM_008365184.2; PREDICTED: Malus x domestica mitogen-activated protein kinase kinase kinase YODA-like (LOC103427113), transcript variant X2, mRNA}	{NA}	322.51	281.383	313.43	228.877	11.4956	7.78477	0.56236	0.60398	0.87762	FALSE	10.5245	11.8423	-0.1702	0.98286	1	FALSE	11.4759	8.50312	0.43255	0.5951	0.84554	FALSE	6.55002	10.4744	-0.6773	0.52745	0.93142	FALSE	7.24624	10.2355	-0.49828	0.55355	1	FALSE	7.10586	7.46484	-0.071103	0.96924
MD03G1080000_novel02	MD03G1080000	Novel_lncRNA	250	1	{NA}	{NA}	{NA}	{NA}	{NA}	{XM_008346560.2; PREDICTED: Malus x domestica tubulin beta-2 chain-like (LOC103407673), mRNA}	{NA}	247.503	26.3333	128.253	221.01	0.349232	2.15866	-2.6279	0.29813	0.64169	FALSE	1.66324	0.359449	2.2101	0.37798	1	FALSE	1.81104	2.35703	-0.38015	0.96936	1	FALSE	2.40512	0.31852	2.9167	0.19113	0.83251	FALSE	2.63595	1.62436	0.69845	0.66444	1	FALSE	2.5592	2.06824	0.30729	0.80206
MD03G1084600_novel02	MD03G1084600	Novel_lncRNA	288	2	{NA}	{NA}	{NA}	{NA}	{NA}	{XM_008387796.2; PREDICTED: Malus x domestica transcription elongation factor B polypeptide 1 (LOC103448532), mRNA}	{NA}	861.113	667.73	858.523	760.483	21.1515	16.4638	0.36146	0.59829	0.87762	FALSE	22.8531	21.6769	0.076229	0.99315	1	FALSE	24.8912	17.9771	0.46948	0.49445	0.77952	FALSE	18.1114	19.1693	-0.081901	0.88611	1	FALSE	20.0343	22.1658	-0.14587	0.83974	1	FALSE	19.6151	15.7634	0.31538	0.6763
MD03G1108000_novel08	MD03G1108000	Novel_lncRNA	343	1	{NA}	{NA}	{NA}	{NA}	{NA}	{XM_008359931.2; PREDICTED: Malus x domestica uncharacterized LOC103421878 (LOC103421878), transcript variant X2, mRNA}	{NA}	491.197	280.257	379.4	581.65	18.4859	19.5021	-0.077198	0.91779	1	FALSE	20.8026	19.0032	0.13052	0.78307	1	FALSE	22.6334	21.2977	0.087754	0.82931	0.96331	FALSE	27.7688	16.8119	0.72399	0.3165	0.86303	FALSE	30.807	20.2694	0.60396	0.41234	0.98512	FALSE	30.1738	18.6738	0.69228	0.27279
MD03G1116800_novel05	MD03G1116800	Novel_lncRNA	305	1	{NA}	{NA}	{NA}	{NA}	{NA}	{XM_008360897.2; PREDICTED: Malus x domestica uncharacterized LOC103422843 (LOC103422843), mRNA}	{NA}	580.043	152.98	530.643	199.387	5.85937	14.802	-1.337	0.15661	0.46982	FALSE	19.3299	6.02041	1.6829	0.054368	1	FALSE	21.0982	16.1653	0.38422	0.59023	0.84362	FALSE	6.02479	5.33136	0.17641	0.8976	1	FALSE	6.60177	18.7854	-1.5087	0.081261	0.66977	FALSE	6.43109	14.1839	-1.1411	0.2078
MD03G1128500_novel01	MD03G1128500	Novel_lncRNA	1900	2	{KGN46889.1; hypothetical protein Csa_6G148310 [Cucumis sativus]}	{NA}	{pxb:103947726; - - - - -}	{NA}	{NA}	{XM_008379674.2; PREDICTED: Malus x domestica uncharacterized LOC103440978 (LOC103440978), mRNA}	{NA}	269.883	126.56	238.323	182.207	137.823	191.585	-0.47517	0.46896	0.79486	FALSE	216.464	141.17	0.6167	0.3488	1	FALSE	235.675	209.294	0.17127	0.68089	0.89375	FALSE	142.864	124.886	0.19404	0.82857	1	FALSE	157.58	210.151	-0.41535	0.37637	0.97865	FALSE	154.099	183.467	-0.25166	0.57973
MD03G1129300	MD03G1129300	Novel_lncRNA	2003	2	{XP_008383024.1; PREDICTED: dnaJ homolog subfamily C member 14 [Malus domestica]}	{NA}	{mdm:103445763; K09534 DNAJC14 DnaJ homolog subfamily C member 14 - -}	{At1g79030; KOG0720 Molecular chaperone (DnaJ superfamily) O Posttranslational modification, protein turnover, chaperones ;}	{NA}	{XR_001952713.1; PREDICTED: Pyrus x bretschneideri uncharacterized LOC103941379 (LOC103941379), ncRNA}	{NA}	428.867	641.633	641.993	438.607	805.96	324.397	1.3129	0.017221	0.13434	FALSE	636.577	827.558	-0.37852	0.54159	1	FALSE	693.794	354.333	0.9694	0.016302	0.10171	FALSE	367.232	731.852	-0.99486	0.15195	0.80934	FALSE	405.987	619.194	-0.60896	0.25881	0.92214	FALSE	396.112	310.724	0.35028	0.34592
MD03G1129700_novel03	MD03G1129700	Novel_lncRNA	2125	1	{XP_011011600.1; PREDICTED: coiled-coil domain-containing protein 132-like isoform X2 [Populus euphratica]}	{NA}	{rcu:8275266; - - - - -}	{NA}	{NA}	{XM_009374202.2; PREDICTED: Pyrus x bretschneideri syndetin-like (LOC103961631), transcript variant X1, mRNA}	{NA}	6.39	8.08	5.99333	7.25333	12.1761	5.17384	1.2347	0.46042	0.78987	FALSE	6.53093	12.5786	-0.94561	0.58985	1	FALSE	7.13295	5.65871	0.33403	0.78626	0.94079	FALSE	6.4357	11.123	-0.78938	0.67902	0.96151	FALSE	7.08686	6.35228	0.15787	0.86581	1	FALSE	6.91603	4.95891	0.47992	0.61112
MD03G1131700_novel01	MD03G1131700	Annotated_lncRNA	442	2	{NA}	{NA}	{NA}	{NA}	{NA}	{XR_527686.1; PREDICTED: Malus x domestica uncharacterized LOC103423823 (LOC103423823), ncRNA}	{NA}	22456.7	5931.73	8170.72	4458.66	711.217	1849.9	-1.3791	0.054109	0.27118	FALSE	875.321	731.352	0.25925	0.77117	1	FALSE	953.097	2020.88	-1.0843	0.015779	0.099983	FALSE	411.216	647.659	-0.65534	0.64627	0.95614	FALSE	451.232	849.722	-0.91312	0.087185	0.67994	FALSE	439.906	1772.99	-2.0109	0.000628
MD03G1132200_novel01	MD03G1132200	Novel_lncRNA	516	3	{NA}	{NA}	{NA}	{NA}	{NA}	{XM_008362001.2; PREDICTED: Malus x domestica uncharacterized LOC103423924 (LOC103423924), mRNA}	{NA}	697.183	115.073	191.833	50.53	20.4424	79.3455	-1.9566	0.0017122	0.026364	TRUE	28.2492	21.0905	0.42162	0.48145	1	FALSE	30.7009	86.6936	-1.4976	0.004818	0.042394	TRUE	6.45541	18.6726	-1.5323	0.2633	0.85852	FALSE	7.10739	27.5085	-1.9525	0.022408	0.58778	FALSE	6.91622	76.0261	-3.4584	2.9795e-08
MD03G1134500_novel03	MD03G1134500	Novel_lncRNA	446	1	{NA}	{NA}	{NA}	{NA}	{NA}	{XR_001789954.1; PREDICTED: Malus x domestica uncharacterized LOC103434624 (LOC103434624), transcript variant X3, ncRNA}	{NA}	189.52	1145.43	2321.19	1147.27	154.559	15.7773	3.2922	1.397e-06	8.502e-05	TRUE	253.944	158.191	0.68284	0.27878	1	FALSE	276.313	17.2524	4.0014	6.5299e-13	1.392e-10	TRUE	110.636	139.883	-0.3384	0.54963	0.93548	FALSE	122.738	246.856	-1.0081	0.032375	0.5962	FALSE	120.04	15.1169	2.9893	5.643e-06
MD03G1136600_novel07	MD03G1136600	Novel_lncRNA	233	1	{NA}	{NA}	{NA}	{NA}	{NA}	{XM_008357008.2; PREDICTED: Malus x domestica DNA helicase INO80-like (LOC103418898), mRNA}	{NA}	1349.13	841.26	895.117	1079.55	6.89281	6.61117	0.060187	0.94377	1	FALSE	6.74837	7.03784	-0.060595	0.92007	1	FALSE	7.34715	7.21282	0.026622	1	1	FALSE	7.38064	6.21795	0.24731	0.94289	1	FALSE	8.16172	6.55031	0.31731	0.79857	1	FALSE	7.99065	6.32063	0.33825	0.78283
MD03G1161700_novel05	MD03G1161700	Novel_lncRNA	1557	1	{XP_011090267.1; PREDICTED: structural maintenance of chromosomes protein 3-like isoform X2 [Sesamum indicum]}	{NA}	{pmum:103329941; K06669 SMC3, CSPG6 structural maintenance of chromosome 3 (chondroitin sulfate proteoglycan 6) - ko04110; Cellular Processes; Cell growth and death; Cell cycle | ko04111; Cellular Processes; Cell growth and death; Cell cycle - yeast | ko04113; Cellular Processes; Cell growth and death; Meiosis - yeast | ko04114; Cellular Processes; Cell growth and death; Oocyte meiosis}	{NA}	{NA}	{XM_017328586.1; PREDICTED: Malus x domestica structural maintenance of chromosomes protein 3-like (LOC103425575), transcript variant X2, mRNA}	{NA}	0	0.646667	0.776667	4.72333	0.592072	0	Inf	0.60158	0.87762	FALSE	0.545996	0.599957	-0.13597	1	1	FALSE	0.592196	0	Inf	0.55956	0.81979	FALSE	2.9428	0.529832	2.4736	0.25714	0.85748	FALSE	3.2508	0.532001	2.6113	0.16302	0.83887	FALSE	3.1773	0	Inf	0.026367
MD03G1174800_novel01	MD03G1174800	Novel_lncRNA	248	1	{XP_008338703.1; PREDICTED: heterogeneous nuclear ribonucleoprotein F-like [Malus domestica]}	{NA}	{fve:101295303; K12898 HNRNPF_H heterogeneous nuclear ribonucleoprotein F/H - -}	{At3g20890; KOG1365 RNA-binding protein Fusilli, contains RRM domain AR RNA processing and modification ; General function prediction only ;}	{NA}	{XM_008340481.2; PREDICTED: Malus x domestica heterogeneous nuclear ribonucleoprotein F-like (LOC103401761), mRNA}	{NA}	5781.69	4423.93	4965.84	5388.15	60.1284	46.7046	0.36448	0.59403	0.87704	FALSE	59.1227	61.8413	-0.064859	0.99497	1	FALSE	64.4433	50.9349	0.33938	0.47842	0.77523	FALSE	56.267	54.7004	0.040736	0.91693	1	FALSE	62.3186	57.4411	0.11758	0.85921	1	FALSE	61.0234	44.7008	0.44906	0.37638
MD03G1190000_novel01	MD03G1190000	Novel_lncRNA	213	1	{NA}	{NA}	{NA}	{NA}	{NA}	{XM_008357091.2; PREDICTED: Malus x domestica 40S ribosomal protein S8 (LOC103418974), mRNA}	{NA}	22833.5	8851.89	15520.3	18003.8	34.9713	56.7583	-0.69866	0.30404	0.64652	FALSE	57.6882	35.8463	0.68645	0.3079	1	FALSE	62.7851	61.9256	0.019886	0.93463	1	FALSE	61.3699	31.7101	0.95259	0.19602	0.83251	FALSE	67.6959	56.0452	0.27248	0.72697	1	FALSE	66.3509	54.3165	0.28873	0.66211
MD03G1205000_novel01	MD03G1205000	Novel_lncRNA	830	7	{NA}	{NA}	{NA}	{NA}	{NA}	{XR_529311.2; PREDICTED: Malus x domestica uncharacterized LOC103434699 (LOC103434699), ncRNA}	{NA}	7886.43	7265.05	5269.09	3459.06	3159.92	1960	0.68903	0.32478	0.66414	FALSE	1735.5	3254.53	-0.90709	0.22888	1	FALSE	1891.97	2142.73	-0.17956	0.67577	0.89375	FALSE	962.434	2878.2	-1.5804	0.067901	0.63734	FALSE	1063.87	1687.49	-0.66555	0.2417	0.90778	FALSE	1038.11	1877.77	-0.85506	0.13198
MD03G1232600_novel02	MD03G1232600	Novel_lncRNA	207	1	{XP_008367099.1; PREDICTED: 30S ribosomal protein S20, chloroplastic-like [Malus domestica]}	{NA}	{pxb:103947584; K02968 RP-S20, rpsT small subunit ribosomal protein S20 - ko03010; Genetic Information Processing; Translation; Ribosome}	{NA}	{NA}	{XM_008368877.2; PREDICTED: Malus x domestica 30S ribosomal protein S20, chloroplastic-like (LOC103430726), mRNA}	{NA}	5782.86	8835.72	6407.57	4469.17	27.2281	11.9485	1.1883	0.088916	0.35077	FALSE	19.1086	27.9332	-0.54775	0.46825	1	FALSE	20.8142	12.9965	0.67944	0.2892	0.60736	FALSE	11.8382	24.7089	-1.0616	0.16853	0.81275	FALSE	13.0932	18.6121	-0.50742	0.48317	0.98512	FALSE	12.8042	11.4308	0.16369	0.80315
MD03G1259900_novel10	MD03G1259900	Novel_lncRNA	270	1	{XP_017184387.1; PREDICTED: sulfate transporter 3.1-like, partial [Malus domestica]}	{sp|Q9SV13|SUT31_ARATH; Sulfate transporter 3.1 OS=Arabidopsis thaliana GN=SULTR3;1 PE=2 SV=1}	{pper:PRUPE_ppa002556mg; K17471 SULTR3 sulfate transporter 3 - -}	{At3g51895; KOG0236 Sulfate/bicarbonate/oxalate exchanger SAT-1 and related transporters (SLC26 family) P Inorganic ion transport and metabolism ;}	{NA}	{XM_017328898.1; PREDICTED: Malus x domestica sulfate transporter 3.1-like (LOC103423101), partial mRNA}	{NA}	1158.99	2877.78	6967.36	19111.8	61.2301	16.6241	1.881	0.12269	0.4159	FALSE	135.433	62.4081	1.1178	0.12802	1	FALSE	147.641	18.142	3.0247	2.8556e-09	2.6088e-07	TRUE	329.721	55.1689	2.5793	0.0023009	0.10848	FALSE	365.666	131.352	1.4771	0.025746	0.5962	FALSE	359.269	15.938	4.4945	1.9923e-06
MD03G1275200_novel02	MD03G1275200	Novel_lncRNA	306	1	{NA}	{NA}	{NA}	{NA}	{NA}	{XM_008370687.2; PREDICTED: Malus x domestica U1 small nuclear ribonucleoprotein C-like (LOC103432484), mRNA}	{NA}	900.64	375.963	502.823	523.253	15.332	23.1527	-0.59463	0.47719	0.79718	FALSE	18.2442	15.7221	0.21465	0.79798	1	FALSE	19.87	25.2586	-0.34618	0.68256	0.89375	FALSE	16.3467	13.9099	0.23289	0.8356	1	FALSE	18.1191	17.7686	0.028182	1	1	FALSE	17.741	22.171	-0.32159	0.64428
MD03G1276200_novel04	MD03G1276200	Novel_lncRNA	2329	2	{XP_017185859.1; PREDICTED: uncharacterized protein LOC108172612 [Malus domestica]}	{NA}	{nta:107773575; - - - - -}	{NA}	{NA}	{XR_001790339.1; PREDICTED: Malus x domestica uncharacterized LOC103438290 (LOC103438290), transcript variant X2, ncRNA}	{NA}	253.823	236.9	317.437	207.823	324.758	227.671	0.51241	0.28728	0.63004	FALSE	370.363	332.481	0.15567	0.87042	1	FALSE	403.488	248.728	0.69796	0.088009	0.31095	FALSE	205.405	294.115	-0.51791	0.39059	0.88922	FALSE	226.656	360.137	-0.66804	0.18291	0.86228	FALSE	221.282	218.079	0.021034	0.86351
MD03G1282000_novel11	MD03G1282000	Novel_lncRNA	1221	4	{XP_008369125.1; PREDICTED: uncharacterized protein LOC103432706 [Malus domestica]}	{NA}	{mdm:103449130; - - - - -}	{NA}	{NA}	{XM_008370903.2; PREDICTED: Malus x domestica uncharacterized LOC103432706 (LOC103432706), mRNA}	{NA}	1784.72	1187.76	1518.75	1804.41	812.421	743.584	0.12773	0.80164	0.97959	FALSE	824.748	833.78	-0.015714	0.95785	1	FALSE	899.049	811.823	0.14723	0.73624	0.9201	FALSE	841.826	737.402	0.19107	0.78222	1	FALSE	932.354	800.573	0.21985	0.67261	1	FALSE	912.964	711.868	0.35895	0.48905
MD03G1289900_novel02	MD03G1289900	Novel_lncRNA	349	1	{NA}	{NA}	{NA}	{NA}	{NA}	{XM_008370803.2; PREDICTED: Malus x domestica indole-3-acetic acid-induced protein ARG2 (LOC103432606), mRNA}	{NA}	25713.4	154699	92719.9	140379	11466.3	1099.02	3.3831	4.7078e-05	0.0018802	TRUE	5564.31	11799.7	-1.0845	0.097986	1	FALSE	6072.69	1199.31	2.3401	1.7585e-05	0.00046858	TRUE	7183.94	10434.9	-0.53857	0.44972	0.90355	FALSE	8021.02	5410.95	0.5679	0.54799	1	FALSE	7881.6	1052.77	2.9043	0.020874
MD03G1296300_novel02	MD03G1296300	Novel_lncRNA	316	1	{NA}	{NA}	{NA}	{NA}	{NA}	{XM_008357278.2; PREDICTED: Malus x domestica GTP-binding protein SAR1A (LOC103419158), mRNA}	{NA}	7168.6	5942.81	7231.45	7486.93	287.423	210.346	0.45041	0.38417	0.72383	FALSE	295.775	294.789	0.0048209	0.98181	1	FALSE	322.379	229.616	0.48954	0.23936	0.55663	FALSE	266.026	260.714	0.029097	0.95582	1	FALSE	294.915	287.363	0.037424	0.96668	1	FALSE	289.217	201.447	0.52175	0.29239
MD04G1003700_novel03	MD04G1003700	Novel_lncRNA	1553	1	{NA}	{NA}	{NA}	{NA}	{NA}	{XM_008382381.2; PREDICTED: Malus x domestica uncharacterized LOC103443508 (LOC103443508), transcript variant X3, mRNA}	{NA}	1.12333	2.6	5.86667	1.13333	2.31385	0.617207	1.9065	0.33816	0.6721	FALSE	4.46806	2.36645	0.91693	0.63044	1	FALSE	4.89286	0.66773	2.8733	0.10154	0.3454	FALSE	0.680507	2.09256	-1.6206	0.44546	0.90298	FALSE	0.740096	4.32682	-2.5475	0.1457	0.78839	FALSE	0.723023	0.587594	0.29922	1
MD04G1022100_novel01	MD04G1022100	Novel_lncRNA	249	1	{NA}	{NA}	{NA}	{NA}	{NA}	{XM_008339262.2; PREDICTED: Malus x domestica protein transport protein SEC23 (LOC103400610), mRNA}	{NA}	458.337	481.643	688.257	464.607	6.73074	3.54157	0.92637	0.47631	0.79676	FALSE	8.74016	6.91162	0.33864	0.73144	1	FALSE	9.53618	3.8735	1.2998	0.19656	0.50685	FALSE	4.94065	6.11082	-0.30667	0.92663	1	FALSE	5.42674	8.50864	-0.64884	0.60986	1	FALSE	5.27998	3.38799	0.6401	0.5353
MD04G1031900_novel01	MD04G1031900	Novel_lncRNA	1955	2	{NA}	{NA}	{NA}	{NA}	{NA}	{XR_668193.1; PREDICTED: Pyrus x bretschneideri uncharacterized LOC103954444 (LOC103954444), ncRNA}	{NA}	55.46	37.77	39.2233	55.3567	42.4172	40.9834	0.049613	0.88283	0.99621	FALSE	37.775	43.4855	-0.2031	0.69599	1	FALSE	41.2002	44.8523	-0.12253	0.82366	0.96118	FALSE	44.6532	38.4733	0.21491	0.8358	1	FALSE	49.2844	36.6823	0.42605	0.46419	0.98512	FALSE	48.2581	39.3098	0.29588	0.60372
MD04G1031900_novel02	MD04G1031900	Novel_lncRNA	2645	1	{NA}	{NA}	{NA}	{NA}	{NA}	{XR_668193.1; PREDICTED: Pyrus x bretschneideri uncharacterized LOC103954444 (LOC103954444), ncRNA}	{NA}	142.517	41.1333	53.9933	50.9933	69.1883	147.349	-1.0906	0.070828	0.3154	FALSE	73.327	70.9756	0.047022	0.96747	1	FALSE	79.9625	160.717	-1.0071	0.028717	0.14992	FALSE	57.8904	62.7703	-0.11676	0.8237	1	FALSE	63.7472	71.2663	-0.16086	0.73469	1	FALSE	62.376	141.05	-1.1771	0.0099196
MD04G1045000_novel04	MD04G1045000	Novel_lncRNA	331	1	{NA}	{NA}	{NA}	{NA}	{NA}	{XM_008370953.2; PREDICTED: Malus x domestica flowering time control protein FPA (LOC103432751), mRNA}	{NA}	268.38	466.777	474.62	594.63	29.5951	9.41522	1.6523	0.17235	0.48607	FALSE	23.3877	30.5469	-0.38527	0.75249	1	FALSE	25.5448	10.2962	1.3109	0.08111	0.29495	FALSE	25.1896	27.0177	-0.10108	0.97227	1	FALSE	27.9718	22.6673	0.30336	0.59197	1	FALSE	27.3866	9.0221	1.6019	0.019015
MD04G1050100_novel07	MD04G1050100	Novel_lncRNA	306	1	{NA}	{NA}	{NA}	{NA}	{NA}	{XM_008370987.2; PREDICTED: Malus x domestica plasminogen activator inhibitor 1 RNA-binding protein (LOC103432779), mRNA}	{NA}	10872.7	4447.09	5647.04	8039.35	181.541	274.578	-0.59692	0.3256	0.66472	FALSE	200.661	186.122	0.10851	0.91431	1	FALSE	218.632	299.658	-0.45481	0.29425	0.61295	FALSE	249.786	164.662	0.60118	0.4039	0.8942	FALSE	276.096	194.868	0.50267	0.33268	0.96771	FALSE	270.53	262.794	0.041854	1
MD04G1053600_novel01	MD04G1053600	Novel_lncRNA	1492	1	{NA}	{NA}	{NA}	{NA}	{NA}	{HF968765.1; Malus x domestica metacontig of the Co-Gene region, cultivar Procats28, columnar allele}	{NA}	0	4.11667	0.473333	0.65	3.85043	0	Inf	0.0229	0.16134	FALSE	0.293184	3.94987	-3.7519	0.050028	1	FALSE	0.317548	0	Inf	1	1	FALSE	0.407272	3.49145	-3.0998	0.1063	0.73696	FALSE	0.460009	0.28309	0.7004	1	1	FALSE	0.456517	0	Inf	0.92176
MD04G1057100_novel01	MD04G1057100	Novel_lncRNA	2058	1	{NA}	{NA}	{NA}	{NA}	{NA}	{XR_527841.2; PREDICTED: Malus x domestica uncharacterized LOC103424903 (LOC103424903), ncRNA}	{NA}	78.7967	51.3767	70.1367	51.5167	64.1749	61.2473	0.067361	0.89883	1	FALSE	71.227	65.8325	0.11362	0.92176	1	FALSE	77.6969	66.9271	0.21527	0.71006	0.91042	FALSE	45.0511	58.2284	-0.37016	0.56136	0.93548	FALSE	50.0774	69.1048	-0.46462	0.39194	0.98512	FALSE	49.0369	58.6528	-0.25833	0.59158
MD04G1061900_novel07	MD04G1061900	Novel_lncRNA	260	1	{NA}	{NA}	{NA}	{NA}	{NA}	{XM_017332025.1; PREDICTED: Malus x domestica cuticle collagen bli-1 (LOC103433001), transcript variant X4, mRNA}	{NA}	0	0	0	0	0	0	NA	NA	NA	NA	0	0	NA	NA	NA	NA	0	0	NA	NA	NA	NA	0	0	NA	NA	NA	NA	0	0	NA	NA	NA	NA	0	0	NA	NA
MD04G1064300_novel01	MD04G1064300	Novel_lncRNA	1138	2	{XP_017185674.1; PREDICTED: ribulose bisphosphate carboxylase/oxygenase activase, chloroplastic-like [Malus domestica]}	{NA}	{NA}	{NA}	{NA}	{HQ445899.1; Malus x domestica cultivar Evereste fire blight resistance locus LG12, complete sequence}	{NA}	154.597	298.66	320.097	189.193	176.324	58.8196	1.5839	0.0053711	0.057448	FALSE	160.674	180.635	-0.16894	0.74904	1	FALSE	174.993	64.2545	1.4454	0.0012299	0.016052	TRUE	80.0959	159.792	-0.9964	0.14882	0.80273	FALSE	88.3919	156.439	-0.82361	0.23593	0.90778	FALSE	86.0003	56.3157	0.6108	0.34733
MD04G1065300_novel03	MD04G1065300	Novel_lncRNA	350	3	{NA}	{NA}	{NA}	{NA}	{NA}	{XM_008357363.2; PREDICTED: Malus x domestica 60S ribosomal protein L24-1-like (LOC103419244), mRNA}	{NA}	6172.58	4292.65	6438.41	5641.45	290.303	259.834	0.15997	0.73209	0.94544	FALSE	376.031	297.833	0.33635	0.58977	1	FALSE	409.677	283.359	0.53186	0.20034	0.50942	FALSE	284.315	263.526	0.10954	0.90657	1	FALSE	313.751	365.381	-0.21978	0.62158	1	FALSE	306.988	248.531	0.30476	0.51615
MD04G1068900_novel17	MD04G1068900	Novel_lncRNA	302	1	{NA}	{NA}	{NA}	{NA}	{NA}	{XM_008383702.2; PREDICTED: Malus x domestica SPX domain-containing membrane protein At4g22990 (LOC103444753), mRNA}	{NA}	2036.18	2796	3445.17	4355.11	110.892	48.9657	1.1793	0.044009	0.24139	FALSE	116.702	113.707	0.037507	1	1	FALSE	127.222	53.5224	1.2491	0.0079404	0.064178	FALSE	128.729	100.564	0.35622	0.66397	0.95614	FALSE	142.725	113.318	0.33287	0.57043	1	FALSE	140.023	46.9099	1.5777	0.0011423
MD04G1088800_novel04	MD04G1088800	Novel_lncRNA	289	1	{NA}	{NA}	{NA}	{NA}	{NA}	{XM_008389302.2; PREDICTED: Malus x domestica splicing factor 3A subunit 2 (LOC103449983), mRNA}	{NA}	1598	867.08	1406.79	1136.15	26.8981	30.6268	-0.18729	0.88301	0.99621	FALSE	39.4135	27.5302	0.51767	0.52262	1	FALSE	42.968	33.4236	0.3624	0.52023	0.7938	FALSE	27.3485	24.352	0.16742	0.89967	1	FALSE	30.1418	38.2996	-0.34556	0.58212	1	FALSE	29.4616	29.3031	0.0077831	0.99572
MD04G1097900_novel02	MD04G1097900	Novel_lncRNA	253	1	{NA}	{NA}	{NA}	{NA}	{NA}	{XM_008369015.2; PREDICTED: Malus x domestica 60S ribosomal protein L12 (LOC103430876), mRNA}	{NA}	2806.59	648.657	969.973	1069.04	9.43938	25.671	-1.4434	0.072445	0.31783	FALSE	12.87	9.67496	0.41168	0.69578	1	FALSE	14.0163	28.015	-0.99909	0.14336	0.42386	FALSE	12.6258	8.56093	0.56053	0.61857	0.95592	FALSE	13.9425	12.5003	0.15753	0.92567	1	FALSE	13.6602	24.573	-0.8471	0.18533
MD04G1121900_novel08	MD04G1121900	Novel_lncRNA	1269	1	{NA}	{NA}	{NA}	{NA}	{GO:0009055; NA GO:0019646; aerobic electron transport chain; biological_process GO:0003700; sequence-specific DNA binding transcription factor activity; molecular_function GO:0006355; regulation of transcription, DNA-dependent; biological_process GO:0030216; keratinocyte differentiation; biological_process GO:0001533; cornified envelope; cellular_component GO:0043565; sequence-specific DNA bindi…	{XR_001952303.1; PREDICTED: Pyrus x bretschneideri uncharacterized LOC108866440 (LOC108866440), transcript variant X1, ncRNA}	{PF00320:GATA zinc finger PF01355:High potential iron-sulfur protein PF06994:Involucrin}	143.477	106.147	127.97	101.833	75.4008	63.0566	0.25793	0.68469	0.9256	FALSE	73.1259	77.4558	-0.082989	0.9387	1	FALSE	79.6694	68.964	0.20818	0.63605	0.87394	FALSE	49.6551	68.5153	-0.46448	0.49407	0.91345	FALSE	54.9027	71.0821	-0.37261	0.45975	0.98512	FALSE	53.709	60.4392	-0.17032	0.74587
MD04G1135900_novel02	MD04G1135900	Novel_lncRNA	321	1	{NA}	{NA}	{NA}	{NA}	{NA}	{NA}	{NA}	195.6	1948.37	2354.19	2516.1	103.258	6.31926	4.0304	1.1375e-08	1.8171e-06	TRUE	106.604	105.947	0.0089196	1	1	FALSE	116.384	6.89041	4.0782	2.3793e-06	9.5096e-05	TRUE	95.6341	93.6782	0.029812	0.99619	1	FALSE	106.399	103.701	0.037059	0.99441	1	FALSE	104.303	6.05748	4.1059	1.1542e-05
MD04G1136900_novel03	MD04G1136900	Novel_lncRNA	271	1	{NA}	{NA}	{NA}	{NA}	{NA}	{XM_008371728.2; PREDICTED: Malus x domestica serine/threonine-protein kinase ATG1c-like (LOC103433464), mRNA}	{NA}	660.393	407.3	587.813	670.487	9.58223	9.199	0.058885	1	1	FALSE	11.3279	9.84465	0.20247	0.84234	1	FALSE	12.334	10.0382	0.29713	0.7492	0.92177	FALSE	11.7239	8.70645	0.42929	0.57916	0.94193	FALSE	12.9338	10.9784	0.23647	0.7084	1	FALSE	12.6144	8.80691	0.51836	0.45397
MD04G1139000_novel05	MD04G1139000	Novel_lncRNA	368	4	{XP_009378878.1; PREDICTED: uncharacterized protein LOC103967341 [Pyrus x bretschneideri]}	{NA}	{pmum:103338677; - - - - -}	{NA}	{NA}	{XM_009380603.2; PREDICTED: Pyrus x bretschneideri uncharacterized LOC103967341 (LOC103967341), mRNA}	{NA}	4090.68	9881.26	7670.61	10971.6	871.524	208.139	2.066	0.0071828	0.07116	FALSE	528.016	896.779	-0.76417	0.21523	1	FALSE	576.234	227.071	1.3435	0.0016478	0.019696	TRUE	651.23	793.015	-0.28418	0.70848	0.97844	FALSE	722.46	512.079	0.49655	0.3095	0.9543	FALSE	707.911	199.408	1.8278	0.00015489
MD04G1139500_novel03	MD04G1139500	Novel_lncRNA	275	1	{NA}	{NA}	{NA}	{NA}	{NA}	{XM_008371794.2; PREDICTED: Malus x domestica glutathione S-transferase U8-like (LOC103433529), mRNA}	{NA}	18195.9	11640.9	15467.6	14923.8	296.906	278.686	0.091367	0.85234	0.98974	FALSE	334.557	304.743	0.13466	0.82515	1	FALSE	364.704	304.263	0.26141	0.52792	0.79813	FALSE	281.24	269.465	0.061705	0.97434	1	FALSE	309.781	324.772	-0.068179	0.83612	1	FALSE	303.439	266.969	0.18473	0.78941
MD04G1153300_novel02	MD04G1153300	Novel_lncRNA	207	1	{NA}	{NA}	{NA}	{NA}	{NA}	{XM_008371874.2; PREDICTED: Malus x domestica pyridoxal 5'-phosphate synthase subunit PDX1.3 (LOC103433606), mRNA}	{NA}	10306.6	16885.8	11162.1	15898.8	52.1911	21.0305	1.3113	0.038655	0.2204	FALSE	33.9907	53.5614	-0.65605	0.32444	1	FALSE	37.0715	22.9599	0.6912	0.20926	0.52022	FALSE	42.2466	47.385	-0.1656	0.73785	0.99451	FALSE	46.7533	33.1157	0.49755	0.46733	0.98512	FALSE	45.8409	20.1511	1.1858	0.041474
MD04G1188900_novel11	MD04G1188900	Novel_lncRNA	434	2	{NA}	{NA}	{NA}	{NA}	{NA}	{XM_008372135.2; PREDICTED: Malus x domestica protein transport protein Sec24-like At3g07100 (LOC103433846), transcript variant X5, mRNA}	{NA}	2312.1	1222.93	1703.73	2284.99	156.75	180.291	-0.20187	0.75219	0.95842	FALSE	179.145	160.787	0.15597	0.83511	1	FALSE	195.34	196.928	-0.011686	0.96178	1	FALSE	206.427	142.204	0.53767	0.42258	0.90298	FALSE	228.654	173.939	0.39458	0.41965	0.98512	FALSE	223.955	172.65	0.37535	0.43179
MD04G1196000_novel05	MD04G1196000	Novel_lncRNA	662	2	{XP_017180522.1; PREDICTED: LOW QUALITY PROTEIN: importin subunit alpha-1-like [Malus domestica]}	{NA}	{mdm:103450872; - - - - -}	{NA}	{NA}	{XM_008390273.2; PREDICTED: Malus x domestica importin subunit alpha-1b-like (LOC103450872), mRNA}	{NA}	9427.4	3670.86	5208.9	7459.56	1064.66	1658.01	-0.63906	0.22896	0.5566	FALSE	1197.9	1094.09	0.13077	0.78626	1	FALSE	1305.25	1810.18	-0.4718	0.24459	0.5591	FALSE	1484.63	967.772	0.61736	0.33624	0.87353	FALSE	1644.19	1162.84	0.49972	0.35887	0.97406	FALSE	1610.7	1587.43	0.02099	0.98962
MD04G1216300	MD04G1216300	Novel_lncRNA	417	3	{NA}	{NA}	{NA}	{NA}	{NA}	{XR_525000.2; PREDICTED: Malus x domestica uncharacterized LOC103408645 (LOC103408645), transcript variant X2, ncRNA}	{NA}	11249.1	31259.2	32427.1	27818.4	3771.37	798.683	2.2394	0.0001426	0.0045988	TRUE	3130.65	3878.36	-0.30898	0.6466	1	FALSE	3414.19	873.203	1.9672	3.3508e-06	0.00012605	TRUE	2292.59	3430.2	-0.58131	0.44745	0.90355	FALSE	2540.68	3041.99	-0.2598	0.67457	1	FALSE	2483.62	765.308	1.6983	0.0012282
MD04G1216300_novel01	MD04G1216300	Novel_lncRNA	630	2	{NA}	{NA}	{NA}	{NA}	{NA}	{XR_529228.2; PREDICTED: Malus x domestica uncharacterized LOC103434131 (LOC103434131), transcript variant X1, ncRNA}	{NA}	13535.1	38006.6	31569.5	32733.4	11035.8	2192.13	2.3318	0.031582	0.19981	FALSE	6831.2	11365.9	-0.7345	0.39913	1	FALSE	7451.67	2396.36	1.6367	0.00022272	0.0040693	TRUE	6024.84	10050.2	-0.73822	0.3824	0.88797	FALSE	6677.27	6634.47	0.009278	1	1	FALSE	6540.51	2099.72	1.6392	0.0073101
MD04G1224300_novel01	MD04G1224300	Novel_lncRNA	277	1	{NA}	{NA}	{NA}	{NA}	{NA}	{XM_008347491.1; PREDICTED: Malus x domestica V-type proton ATPase subunit F (LOC103408657), mRNA}	{NA}	3193.59	1013.26	1605.26	1587.91	26.2311	50.4031	-0.94223	0.1439	0.45058	FALSE	35.0857	26.9665	0.37972	0.57315	1	FALSE	38.2123	55.0012	-0.52543	0.3146	0.63493	FALSE	31.1611	23.8606	0.38511	0.6319	0.95614	FALSE	34.4104	34.0218	0.016385	0.96535	1	FALSE	33.7412	48.2613	-0.51636	0.28422
MD04G1226600_novel01	MD04G1226600	Novel_lncRNA	403	1	{NA}	{NA}	{NA}	{NA}	{NA}	{XM_008372491.2; PREDICTED: Malus x domestica histone H1.2-like (LOC103434179), mRNA}	{NA}	7642.26	4121.74	4019.57	6026.27	461.29	498.391	-0.1116	0.70199	0.93316	FALSE	349.996	475.421	-0.44187	0.56022	1	FALSE	381.44	545.34	-0.5157	0.20779	0.51822	FALSE	454.356	420.563	0.1115	0.70286	0.97679	FALSE	502.441	339.761	0.56443	0.21085	0.88073	FALSE	490.996	477.792	0.03933	0.87887
MD04G1231600_novel05	MD04G1231600	Novel_lncRNA	302	1	{NA}	{NA}	{NA}	{NA}	{NA}	{XM_017331757.1; PREDICTED: Malus x domestica protein PHR1-LIKE 1 (LOC103434216), transcript variant X2, mRNA}	{NA}	7930.62	6835.25	9610.44	10165.6	272.258	189.158	0.52538	0.34353	0.6779	FALSE	322.73	279.539	0.20728	0.71453	1	FALSE	351.577	206.427	0.76821	0.069965	0.28052	FALSE	300.279	247.269	0.28022	0.70272	0.97679	FALSE	332.774	313.482	0.086156	0.95335	1	FALSE	326.259	181.047	0.84965	0.077165
MD04G1235100_novel01	MD04G1235100	Novel_lncRNA	418	3	{XP_017189538.1; PREDICTED: uncharacterized protein LOC108173951 [Malus domestica]}	{NA}	{mdm:108173951; - - - - -}	{NA}	{NA}	{XM_017327468.1; PREDICTED: Malus x domestica zinc finger BED domain-containing protein DAYSLEEPER-like (LOC108171400), mRNA}	{NA}	604.337	298.94	317.153	346.507	34.2216	42.9814	-0.3288	0.6506	0.90463	FALSE	30.2484	35.1181	-0.21535	0.73247	1	FALSE	32.9684	46.8696	-0.50757	0.35272	0.66999	FALSE	28.4436	31.067	-0.12728	0.86135	1	FALSE	31.3921	29.3615	0.096475	0.86995	1	FALSE	30.698	41.1322	-0.42213	0.4678
MD04G1243900_novel03	MD04G1243900	Novel_lncRNA	1591	1	{NA}	{NA}	{NA}	{NA}	{GO:0003899; DNA-directed RNA polymerase activity; molecular_function GO:0006351; transcription, DNA-dependent; biological_process}	{XM_008357626.2; PREDICTED: Malus x domestica uncharacterized LOC103419526 (LOC103419526), mRNA}	{PF10385:RNA polymerase beta subunit external 1 domain}	52.53	12.4867	26.95	18.2367	10.6479	30.1928	-1.5036	0.053686	0.27103	FALSE	19.7798	10.9056	0.85896	0.33183	1	FALSE	21.535	32.9277	-0.61262	0.31907	0.63944	FALSE	11.7587	9.65046	0.28506	0.85476	1	FALSE	13.0328	19.1873	-0.558	0.44154	0.98512	FALSE	12.7659	28.8844	-1.178	0.065533
MD05G1008600_novel08	MD05G1008600	Novel_lncRNA	501	1	{XP_008338454.1; PREDICTED: probable methyltransferase PMT24 [Malus domestica]}	{sp|Q6NPR7|PMTO_ARATH; Probable methyltransferase PMT24 OS=Arabidopsis thaliana GN=At1g29470 PE=2 SV=1}	{pper:PRUPE_ppa001750mg; - - - - -}	{NA}	{GO:0005576; NA GO:0045087; innate immune response; biological_process}	{XM_008340232.2; PREDICTED: Malus x domestica probable methyltransferase PMT24 (LOC103401520), mRNA}	{PF13841:Beta defensin}	1712.99	498.847	858.283	1945.98	85.2335	183.57	-1.1068	0.06723	0.30921	FALSE	119.351	87.3751	0.44991	0.50772	1	FALSE	129.983	200.475	-0.62509	0.16057	0.45038	FALSE	237.31	77.285	1.6185	0.016814	0.33974	FALSE	262.625	115.776	1.1817	0.018277	0.58778	FALSE	257.561	175.836	0.55068	0.26999
MD05G1026600_novel04	MD05G1026600	Novel_lncRNA	2479	1	{XP_009344003.1; PREDICTED: uncharacterized protein LOC103935907 [Pyrus x bretschneideri]}	{NA}	{pper:PRUPE_ppa014643mg; - - - - -}	{NA}	{NA}	{XM_018645951.1; PREDICTED: Pyrus x bretschneideri uncharacterized LOC103941034 (LOC103941034), mRNA}	{NA}	7.66333	5.68333	5.57333	2.73667	8.01239	7.31919	0.13055	0.93234	1	FALSE	7.15857	8.23454	-0.20202	0.95599	1	FALSE	7.79345	7.97645	-0.033485	0.99408	1	FALSE	2.87578	7.28996	-1.342	0.28205	0.86303	FALSE	3.16084	6.99525	-1.1461	0.31172	0.9543	FALSE	3.08229	6.9985	-1.183	0.3079
MD05G1027100_novel05	MD05G1027100	Novel_lncRNA	245	1	{NA}	{NA}	{NA}	{NA}	{NA}	{XM_008340873.2; PREDICTED: Malus x domestica probable acyl-activating enzyme 1, peroxisomal (LOC103402132), transcript variant X2, mRNA}	{NA}	691.553	345.783	693.413	830.607	4.38807	4.89812	-0.15864	0.92152	1	FALSE	6.92498	4.51645	0.61662	0.61183	1	FALSE	7.5272	5.32352	0.49973	0.74562	0.92177	FALSE	7.99413	3.99452	1.0009	0.34269	0.87353	FALSE	8.81186	6.69285	0.39683	0.68679	1	FALSE	8.61867	4.67577	0.88226	0.35818
MD05G1033300_novel02	MD05G1033300	Novel_lncRNA	2828	1	{XP_008386373.1; PREDICTED: protein GIGANTEA-like [Malus domestica]}	{NA}	{mdm:103448893; K12124 GI GIGANTEA - ko04712; Organismal Systems; Environmental adaptation; Circadian rhythm - plant}	{NA}	{NA}	{XM_008388151.2; PREDICTED: Malus x domestica protein GIGANTEA-like (LOC103448893), mRNA}	{NA}	217.52	224.363	231.457	164.147	414.579	241.905	0.77721	0.18049	0.50131	FALSE	333.897	426.392	-0.35278	0.57102	1	FALSE	364.202	263.961	0.46441	0.29913	0.61807	FALSE	202.241	377.152	-0.89907	0.2001	0.83251	FALSE	223.711	323.837	-0.53364	0.32677	0.96429	FALSE	218.549	231.585	-0.083586	0.9477
MD05G1048100_novel05	MD05G1048100	Novel_lncRNA	2963	1	{XP_007220675.1; hypothetical protein PRUPE_ppa016897mg [Prunus persica]}	{NA}	{pper:PRUPE_ppa002360mg; - - - - -}	{NA}	{NA}	{FM253563.1; Prunus cerasifera BAC insert containing Ma gene, resistant Ma1 allele, clone 76H19}	{NA}	3.44333	2.62667	2.65	4.99333	4.78853	4.08466	0.22937	0.78122	0.97188	FALSE	3.82152	4.88522	-0.35428	0.7115	1	FALSE	4.15412	4.45679	-0.10146	1	1	FALSE	6.48664	4.3191	0.58674	0.75636	1	FALSE	7.18135	3.7027	0.95568	0.42112	0.98512	FALSE	7.03928	3.91596	0.84606	0.42715
MD05G1050000_novel01	MD05G1050000	Novel_lncRNA	2601	2	{XP_010104175.1; DNA-directed RNA polymerases I, II, and III subunit RPABC5 [Morus notabilis]}	{sp|Q39290|RPAB5_BRANA; DNA-directed RNA polymerases I, II, and III subunit RPABC5 OS=Brassica napus PE=3 SV=1}	{brp:103831031; K03007 RPB10, POLR2L DNA-directed RNA polymerases I, II, and III subunit RPABC5 - ko00230; Metabolism; Nucleotide metabolism; Purine metabolism | ko00240; Metabolism; Nucleotide metabolism; Pyrimidine metabolism | ko03020; Genetic Information Processing; Transcription; RNA polymerase | ko04623; Organismal Systems; Immune system; Cytosolic DNA-sensing pathway | ko05016; Human Disea…	{At1g61700; KOG3497 DNA-directed RNA polymerase, subunit RPB10 K Transcription ;}	{NA}	{XM_008375011.2; PREDICTED: Malus x domestica DNA-directed RNA polymerase subunit 10-like protein (LOC103436572), mRNA}	{NA}	74.5867	22.2033	30.4067	36.1767	36.9263	75.5608	-1.033	0.08699	0.34753	FALSE	40.1122	37.9689	0.079221	0.83184	1	FALSE	43.6796	82.4715	-0.91694	0.071173	0.28199	FALSE	40.7391	33.5847	0.27861	0.70759	0.97844	FALSE	45.1228	39.0097	0.21002	0.84475	1	FALSE	44.2615	72.3403	-0.70875	0.11625
MD05G1050000_novel02	MD05G1050000	Novel_lncRNA	2092	3	{XP_008373233.1; PREDICTED: DNA-directed RNA polymerase subunit 10-like protein [Malus domestica]}	{sp|Q9SYA6|RPBAL_ARATH; DNA-directed RNA polymerase subunit 10-like protein OS=Arabidopsis thaliana GN=NRPB10L PE=1 SV=1}	{brp:103831031; K03007 RPB10, POLR2L DNA-directed RNA polymerases I, II, and III subunit RPABC5 - ko00230; Metabolism; Nucleotide metabolism; Purine metabolism | ko00240; Metabolism; Nucleotide metabolism; Pyrimidine metabolism | ko03020; Genetic Information Processing; Transcription; RNA polymerase | ko04623; Organismal Systems; Immune system; Cytosolic DNA-sensing pathway | ko05016; Human Disea…	{At1g61700; KOG3497 DNA-directed RNA polymerase, subunit RPB10 K Transcription ;}	{GO:0003899; DNA-directed RNA polymerase activity; molecular_function GO:0006351; transcription, DNA-dependent; biological_process GO:0003677; DNA binding; molecular_function}	{XM_008375011.2; PREDICTED: Malus x domestica DNA-directed RNA polymerase subunit 10-like protein (LOC103436572), mRNA}	{PF01194:RNA polymerases N / 8 kDa subunit}	865.347	316.483	337.153	332.967	394.695	684.793	-0.79493	0.14548	0.45058	FALSE	343.507	405.48	-0.23929	0.69141	1	FALSE	374.184	747.122	-0.99759	0.016093	0.10139	FALSE	292.524	358.758	-0.29446	0.64297	0.95614	FALSE	323.189	333.438	-0.045037	0.91262	1	FALSE	316.28	655.307	-1.051	0.026737
MD05G1050100_novel01	MD05G1050100	Novel_lncRNA	217	1	{XP_008373232.1; PREDICTED: uncharacterized protein LOC103436571 [Malus domestica]}	{NA}	{pper:PRUPE_ppa005256mg; - - - - -}	{NA}	{NA}	{XM_008375010.2; PREDICTED: Malus x domestica uncharacterized LOC103436571 (LOC103436571), mRNA}	{NA}	536.28	151.083	528.023	532.41	0.780478	1.42754	-0.8711	0.76606	0.96646	FALSE	2.18353	0.807087	1.4359	0.48498	1	FALSE	2.37753	1.57441	0.59465	0.90397	0.99929	FALSE	2.11582	0.71438	1.5665	0.48688	0.91345	FALSE	2.36039	2.1067	0.16404	1	1	FALSE	2.32093	1.37072	0.75977	0.82694
MD05G1058800_novel03	MD05G1058800	Novel_lncRNA	325	1	{NA}	{NA}	{NA}	{NA}	{NA}	{XM_008384095.2; PREDICTED: Malus x domestica cysteine protease RD19A (LOC103445116), mRNA}	{NA}	80858.9	37861.3	47289.3	58128.1	2036.01	2661.46	-0.38647	0.4862	0.80384	FALSE	2134.5	2091.75	0.029187	0.94621	1	FALSE	2326.22	2908.11	-0.32209	0.44192	0.74175	FALSE	2282.19	1850.55	0.30246	0.65272	0.95614	FALSE	2521.99	2072.4	0.28326	0.62104	1	FALSE	2469.6	2550.16	-0.046311	0.90759
MD05G1067800_novel02	MD05G1067800	Novel_lncRNA	389	2	{NA}	{NA}	{NA}	{NA}	{NA}	{XM_008393841.2; PREDICTED: Malus x domestica ras-related protein Rab7 (LOC103454250), mRNA}	{NA}	10928.9	4827.16	5327.1	7881.48	483.351	642.622	-0.4109	0.43727	0.76657	FALSE	427.635	496.438	-0.21523	0.70453	1	FALSE	466.499	701.514	-0.5886	0.1355	0.40683	FALSE	541.752	439.016	0.30336	0.64932	0.95614	FALSE	599.029	414.944	0.52971	0.29148	0.95378	FALSE	586.9	615.228	-0.068006	0.82905
MD05G1069000_novel02	MD05G1069000	Novel_lncRNA	1101	2	{NA}	{NA}	{NA}	{NA}	{NA}	{XR_001790722.1; PREDICTED: Malus x domestica uncharacterized LOC103440393 (LOC103440393), transcript variant X8, ncRNA}	{NA}	197.257	186.077	121.543	179.233	125.25	71.9729	0.79929	0.5689	0.86612	FALSE	57.7077	129.356	-1.1645	0.40629	1	FALSE	62.9944	78.6353	-0.31995	0.40703	0.71034	FALSE	72.7523	114.395	-0.65296	0.65727	0.95614	FALSE	80.3032	55.8526	0.52383	0.23992	0.90778	FALSE	78.5286	68.9234	0.18822	0.68506
MD05G1084000_novel01	MD05G1084000	Novel_lncRNA	251	1	{NA}	{NA}	{NA}	{NA}	{NA}	{XM_008366312.2; PREDICTED: Malus x domestica 40S ribosomal protein S16 (LOC103428217), mRNA}	{NA}	9058.56	3179.2	4669.46	7497.61	45.4022	78.6337	-0.79238	0.18543	0.50901	FALSE	59.3557	46.6947	0.34613	0.55236	1	FALSE	64.6572	85.8583	-0.40915	0.40438	0.70859	FALSE	84.303	41.3279	1.0285	0.12169	0.78067	FALSE	93.0554	57.6662	0.69036	0.21122	0.88073	FALSE	91.2073	75.2853	0.27678	0.63702
MD05G1105200	MD05G1105200	Novel_lncRNA	1266	3	{NA}	{NA}	{NA}	{NA}	{NA}	{XR_001789981.1; PREDICTED: Malus x domestica uncharacterized LOC103436323 (LOC103436323), ncRNA}	{NA}	523.673	325.34	535.413	301.47	220.553	229.17	-0.055294	0.98638	1	FALSE	304.114	225.895	0.42896	0.50865	1	FALSE	331.172	250.439	0.40312	0.30645	0.62612	FALSE	145.942	199.819	-0.4533	0.47684	0.91281	FALSE	161.062	295.741	-0.87672	0.080006	0.66977	FALSE	157.127	219.558	-0.48267	0.36236
MD05G1107100_novel01	MD05G1107100	Novel_lncRNA	1479	4	{XP_017190245.1; PREDICTED: uncharacterized protein LOC103446608 isoform X1 [Malus domestica]}	{NA}	{mdm:103446608; - - - - -}	{NA}	{NA}	{XR_001953992.1; PREDICTED: Pyrus x bretschneideri uncharacterized LOC103957413 (LOC103957413), transcript variant X3, ncRNA}	{NA}	137.91	99.8067	122.67	90.0067	93.738	73.3001	0.35482	0.76503	0.96637	FALSE	84.7893	96.7022	-0.18967	0.93032	1	FALSE	92.4686	80.1463	0.20633	0.70053	0.90778	FALSE	52.9879	85.5269	-0.69072	0.55181	0.93548	FALSE	58.6616	82.2679	-0.48791	0.40856	0.98512	FALSE	57.2959	70.2381	-0.29382	0.61807
MD05G1107100_novel02	MD05G1107100	Novel_lncRNA	2203	1	{XP_017190245.1; PREDICTED: uncharacterized protein LOC103446608 isoform X1 [Malus domestica]}	{NA}	{mdm:103446608; - - - - -}	{NA}	{NA}	{XR_001789643.1; PREDICTED: Malus x domestica uncharacterized LOC103432102 (LOC103432102), transcript variant X5, ncRNA}	{NA}	133.797	104.263	38.5533	26.76	152.691	112.537	0.44022	0.59945	0.87762	FALSE	41.8388	157.442	-1.9119	0.047901	1	FALSE	45.6117	122.912	-1.4301	0.0022952	0.024463	TRUE	25.005	139.257	-2.4775	0.033202	0.43573	FALSE	27.6362	40.5901	-0.55457	0.63945	1	FALSE	26.8562	107.771	-2.0046	0.00019705
MD05G1107100_novel03	MD05G1107100	Novel_lncRNA	1794	3	{XP_017190245.1; PREDICTED: uncharacterized protein LOC103446608 isoform X1 [Malus domestica]}	{NA}	{mdm:103446608; - - - - -}	{NA}	{NA}	{XR_001789643.1; PREDICTED: Malus x domestica uncharacterized LOC103432102 (LOC103432102), transcript variant X5, ncRNA}	{NA}	436.353	442.6	268.073	220.627	515.338	291.25	0.82326	0.22842	0.5566	FALSE	235.313	530.364	-1.1724	0.12002	1	FALSE	256.643	318.272	-0.3105	0.48423	0.77952	FALSE	163.334	468.983	-1.5217	0.061969	0.62116	FALSE	180.889	228.761	-0.33873	0.51929	0.99253	FALSE	176.786	279.091	-0.65874	0.17107
MD05G1107100_novel04	MD05G1107100	Novel_lncRNA	2628	2	{XP_017190245.1; PREDICTED: uncharacterized protein LOC103446608 isoform X1 [Malus domestica]}	{NA}	{mdm:103446608; - - - - -}	{NA}	{NA}	{XR_001789643.1; PREDICTED: Malus x domestica uncharacterized LOC103432102 (LOC103432102), transcript variant X5, ncRNA}	{NA}	307.843	212.873	141.4	103.493	395.995	313.903	0.33516	0.8539	0.98974	FALSE	187.408	408.88	-1.1255	0.4013	1	FALSE	204.16	343.003	-0.74852	0.080919	0.29495	FALSE	117.875	361.61	-1.6172	0.26589	0.85852	FALSE	130.373	182.058	-0.48175	0.36868	0.97671	FALSE	127.255	300.516	-1.2397	0.0087105
MD05G1107100_novel05	MD05G1107100	Novel_lncRNA	1876	2	{XP_011655812.1; PREDICTED: sulfhydryl oxidase 2 isoform X2 [Cucumis sativus]}	{NA}	{cmo:103489336; K10758 QSOX thiol oxidase 1.8.3.2 -}	{NA}	{NA}	{XR_001789643.1; PREDICTED: Malus x domestica uncharacterized LOC103432102 (LOC103432102), transcript variant X5, ncRNA}	{NA}	0	0	0	0	0	0	NA	NA	NA	NA	0	0	NA	NA	NA	NA	0	0	NA	NA	NA	NA	0	0	NA	NA	NA	NA	0	0	NA	NA	NA	NA	0	0	NA	NA
MD05G1113100_novel01	MD05G1113100	Novel_lncRNA	474	1	{APO15257.1; L-galactose dehydrogenase [Prunus avium]}	{NA}	{fve:101299720; K17744 GalDH L-galactose dehydrogenase 1.1.1.316 ko00053; Metabolism; Carbohydrate metabolism; Ascorbate and aldarate metabolism}	{At4g33670; KOG1576 Predicted oxidoreductase C Energy production and conversion ;}	{NA}	{AY264803.1; Malus x domestica L-galactose dehydrogenase mRNA, complete cds}	{NA}	558.347	65.7367	75.29	143.913	9.57335	53.2202	-2.4749	0.0004568	0.010425	TRUE	9.22508	9.84872	-0.094374	0.97131	1	FALSE	10.0422	58.1117	-2.5327	2.9853e-05	0.00076363	TRUE	15.2823	8.71872	0.80967	0.55467	0.93548	FALSE	16.7081	8.9401	0.90219	0.49411	0.98512	FALSE	16.3153	50.9661	-1.6433	0.0046877
MD05G1115300_novel02	MD05G1115300	Novel_lncRNA	683	1	{ONH92174.1; hypothetical protein PRUPE_8G160000 [Prunus persica]}	{NA}	{NA}	{NA}	{GO:0016020; membrane; cellular_component}	{XM_008374654.2; PREDICTED: Malus x domestica uncharacterized LOC103436231 (LOC103436231), mRNA}	{PF01284:Membrane-associating domain}	10779.3	2817.51	3004.29	3111.1	824.807	2001.18	-1.2787	0.020876	0.15333	FALSE	727.099	847.238	-0.22061	0.75614	1	FALSE	791.376	2187.84	-1.4671	0.00059325	0.0093675	TRUE	643.399	749.617	-0.22044	0.72697	0.98871	FALSE	709.232	707.417	0.0036963	0.94206	1	FALSE	693.783	1917.69	-1.4668	0.0050533
MD05G1116200_novel01	MD05G1116200	Novel_lncRNA	1773	4	{NA}	{NA}	{NA}	{NA}	{NA}	{XR_527022.2; PREDICTED: Malus x domestica uncharacterized LOC103420050 (LOC103420050), ncRNA}	{NA}	274.777	211.89	169.83	125.26	238.501	181.304	0.39558	0.5592	0.86208	FALSE	147.163	245.57	-0.73871	0.26909	1	FALSE	160.544	198.134	-0.30351	0.49734	0.77952	FALSE	91.4468	217.192	-1.248	0.075562	0.66799	FALSE	101.344	143.006	-0.49682	0.35042	0.97406	FALSE	99.0186	173.758	-0.81131	0.090474
MD05G1116200_novel02	MD05G1116200	Novel_lncRNA	1689	1	{NA}	{NA}	{NA}	{NA}	{NA}	{XR_529535.2; PREDICTED: Malus x domestica uncharacterized LOC103436234 (LOC103436234), ncRNA}	{NA}	10.8967	7.99667	5.69667	2.44667	7.99246	6.66583	0.26185	0.78056	0.97188	FALSE	4.43314	8.20175	-0.8876	0.40021	1	FALSE	4.82367	7.26257	-0.59035	0.67123	0.89375	FALSE	1.85138	7.25396	-1.9702	0.13803	0.78796	FALSE	2.02563	4.29724	-1.085	0.51576	0.99242	FALSE	1.96933	6.38792	-1.6976	0.33165
MD05G1118500_novel01	MD05G1118500	Novel_lncRNA	2354	1	{NA}	{NA}	{NA}	{NA}	{NA}	{AB545982.1; Pyrus pyrifolia genes for F-box proteins and S2-RNase, complete cds, haplotype: S2}	{NA}	192.257	100.083	120.763	241.453	150.779	177.234	-0.23321	0.7634	0.96637	FALSE	138.324	155.297	-0.16698	0.90629	1	FALSE	150.521	193.771	-0.36439	0.73673	0.9201	FALSE	246.059	137.387	0.84076	0.17192	0.81275	FALSE	273.661	134.211	1.0279	0.085769	0.67994	FALSE	268.645	170.1	0.65932	0.41945
MD05G1118500_novel02	MD05G1118500	Novel_lncRNA	1170	1	{NA}	{NA}	{NA}	{NA}	{NA}	{XM_008374676.2; PREDICTED: Malus x domestica glycine-rich protein 2-like (LOC103436253), mRNA}	{NA}	14.14	2.20667	0	4.82333	1.48018	5.69045	-1.9428	0.29658	0.64169	FALSE	0	1.49989	#NAME?	0.3908	1	FALSE	0	6.25084	#NAME?	0.021087	0.12204	FALSE	2.0488	1.32458	0.62924	0.96298	1	FALSE	2.27043	0	Inf	0.082869	0.66977	FALSE	2.22592	5.46522	-1.2959	0.30175
MD05G1118500_novel04	MD05G1118500	Novel_lncRNA	443	1	{NA}	{NA}	{NA}	{NA}	{NA}	{XM_008374676.2; PREDICTED: Malus x domestica glycine-rich protein 2-like (LOC103436253), mRNA}	{NA}	48489.5	35199.7	56101.1	64290.1	4501.09	3952.9	0.18736	0.67232	0.91956	FALSE	6103.35	4613.19	0.40384	0.55209	1	FALSE	6651.43	4313.08	0.62495	0.15516	0.44496	FALSE	6066.15	4081.35	0.57173	0.46649	0.90968	FALSE	6711.66	5922.96	0.18035	0.79254	1	FALSE	6576.61	3782.86	0.79787	0.21005
MD05G1118500_novel06	MD05G1118500	Novel_lncRNA	2663	2	{XP_008340673.1; PREDICTED: uncharacterized protein LOC103403603 [Malus domestica]}	{NA}	{mdm:103445583; K18466 VPS26 vacuolar protein sorting-associated protein 26 - ko04144; Cellular Processes; Transport and catabolism; Endocytosis}	{NA}	{NA}	{XR_001951798.1; PREDICTED: Pyrus x bretschneideri uncharacterized LOC108865960 (LOC108865960), transcript variant X2, ncRNA}	{NA}	478.153	284.287	379.897	492.317	464.972	508.422	-0.12888	0.96489	1	FALSE	510.268	477.037	0.097153	0.89242	1	FALSE	555.918	555.377	0.0014036	0.94739	1	FALSE	563.312	422.003	0.41668	0.50236	0.91752	FALSE	620.957	495.602	0.32531	0.4685	0.98512	FALSE	606.577	488.046	0.31367	0.66684
MD05G1150400_novel01	MD05G1150400	Novel_lncRNA	1858	2	{NA}	{NA}	{NA}	{NA}	{NA}	{XR_526683.2; PREDICTED: Malus x domestica uncharacterized LOC103418058 (LOC103418058), transcript variant X1, ncRNA}	{NA}	134.45	52.34	63.41	58.6033	61.1857	93.1503	-0.60637	0.26023	0.59797	FALSE	56.7712	62.9918	-0.15001	0.90581	1	FALSE	61.8769	101.796	-0.71821	0.11984	0.38225	FALSE	44.7057	55.7181	-0.31769	0.68276	0.96466	FALSE	49.2741	55.0945	-0.16108	0.74686	1	FALSE	48.2394	89.2306	-0.88733	0.055038
MD05G1157000_novel02	MD05G1157000	Novel_lncRNA	287	1	{NA}	{NA}	{NA}	{NA}	{NA}	{XM_009360695.2; PREDICTED: Pyrus x bretschneideri probable D-amino acid oxidase PA4548 (LOC103949575), transcript variant X1, mRNA}	{NA}	217.753	67.92	212.347	102.127	2.37025	3.93434	-0.73108	0.5603	0.86273	FALSE	5.68117	2.44998	1.2134	0.31418	1	FALSE	6.20595	4.28363	0.53482	0.73741	0.9201	FALSE	2.38905	2.16688	0.14082	0.96332	1	FALSE	2.64048	5.49336	-1.0569	0.43939	0.98512	FALSE	2.58743	3.75774	-0.53834	0.70385
MD05G1160000_novel01	MD05G1160000	Novel_lncRNA	2031	4	{XP_008372906.1; PREDICTED: 26S proteasome non-ATPase regulatory subunit 4 homolog isoform X1 [Malus domestica]}	{sp|P55034|PSMD4_ARATH; 26S proteasome non-ATPase regulatory subunit 4 homolog OS=Arabidopsis thaliana GN=RPN10 PE=1 SV=1}	{fve:101310273; K03029 PSMD4, RPN10 26S proteasome regulatory subunit N10 - ko03050; Genetic Information Processing; Folding, sorting and degradation; Proteasome | ko05169; Human Diseases; Infectious diseases: Viral; Epstein-Barr virus infection}	{At4g38630; KOG2884 26S proteasome regulatory complex, subunit RPN10/PSMD4 O Posttranslational modification, protein turnover, chaperones ;}	{NA}	{XR_524935.2; PREDICTED: Malus x domestica uncharacterized LOC103408350 (LOC103408350), transcript variant X1, ncRNA}	{NA}	362.39	133.157	189.407	122.8	164.546	277.903	-0.75609	0.17267	0.48607	FALSE	190.171	169.041	0.16993	0.76147	1	FALSE	207.356	303.667	-0.55038	0.19821	0.50803	FALSE	104.243	149.536	-0.52053	0.47416	0.91281	FALSE	115.143	184.753	-0.68218	0.19103	0.86228	FALSE	112.386	266.172	-1.2439	0.0085448
MD05G1165200_novel01	MD05G1165200	Novel_lncRNA	286	1	{NA}	{NA}	{NA}	{NA}	{NA}	{XM_008374324.2; PREDICTED: Malus x domestica 40S ribosomal protein SA-like (LOC103435895), mRNA}	{NA}	436.697	293.663	427.087	504.663	9.06897	7.95127	0.18975	0.87153	0.99464	FALSE	11.6009	9.30882	0.31757	0.76073	1	FALSE	12.6606	8.66349	0.54733	0.53622	0.8031	FALSE	11.7499	8.23325	0.51312	0.64144	0.95614	FALSE	13.0875	11.2724	0.21539	0.88337	1	FALSE	12.8509	7.60308	0.75722	0.41258
MD05G1177800_novel01	MD05G1177800	Novel_lncRNA	286	1	{NA}	{NA}	{NA}	{NA}	{NA}	{XM_008374236.2; PREDICTED: Malus x domestica putative vesicle-associated membrane protein 726 (LOC103435816), mRNA}	{NA}	8044.28	11198.7	10659.1	14153.6	359.728	147.634	1.2849	0.028429	0.1878	FALSE	284.748	369.969	-0.37772	0.56235	1	FALSE	310.651	161.083	0.94749	0.033518	0.16606	FALSE	328.23	327.175	0.004643	0.99022	1	FALSE	364.678	276.402	0.39985	0.48128	0.98512	FALSE	358.051	141.284	1.3416	0.013443
MD05G1184100_novel01	MD05G1184100	Novel_lncRNA	1021	5	{XP_017188223.1; PREDICTED: lysine-specific demethylase JMJ25-like [Malus domestica]}	{NA}	{NA}	{NA}	{NA}	{XR_525094.2; PREDICTED: Malus x domestica uncharacterized LOC103409160 (LOC103409160), ncRNA}	{NA}	185.21	185.723	110.97	281.72	108.165	61.51	0.81434	0.34425	0.6779	FALSE	48.4946	111.516	-1.2014	0.18565	1	FALSE	52.9432	67.2351	-0.34477	0.4247	0.72392	FALSE	105.861	98.6268	0.10212	0.85632	1	FALSE	117.9	47.0202	1.3262	0.07114	0.64828	FALSE	115.858	58.9326	0.97521	0.18019
MD05G1184100_novel05	MD05G1184100	Novel_lncRNA	1894	2	{XP_017188223.1; PREDICTED: lysine-specific demethylase JMJ25-like [Malus domestica]}	{NA}	{NA}	{NA}	{NA}	{XR_001951765.1; PREDICTED: Pyrus x bretschneideri uncharacterized LOC103932061 (LOC103932061), transcript variant X3, ncRNA}	{NA}	163.617	140.153	188.48	232.643	161.843	115.859	0.48223	0.40568	0.7424	FALSE	171.661	166.249	0.046214	0.94935	1	FALSE	187.116	126.48	0.56503	0.21769	0.52733	FALSE	183.658	147.053	0.32069	0.57764	0.94193	FALSE	203.53	166.473	0.28996	0.49903	0.98512	FALSE	199.119	110.931	0.84397	0.053441
MD05G1190100_novel03	MD05G1190100	Novel_lncRNA	347	2	{XP_004245107.1; PREDICTED: K(+) efflux antiporter 4 [Solanum lycopersicum]}	{sp|B5X0N6|KEA6_ARATH; K(+) efflux antiporter 6 OS=Arabidopsis thaliana GN=KEA6 PE=2 SV=1}	{brp:103846691; - - - - -}	{At2g19600; KOG1650 Predicted K+/H+-antiporter P Inorganic ion transport and metabolism ;}	{GO:0009405; pathogenesis; biological_process GO:0005198; NA}	{XR_001951453.1; PREDICTED: Pyrus x bretschneideri K(+) efflux antiporter 6-like (LOC108865667), transcript variant X4, misc_RNA}	{PF00906:Hepatitis core antigen}	167.433	58.89	116.803	55.7667	3.98244	6.81746	-0.77558	0.58593	0.87419	FALSE	6.93011	4.07347	0.76662	0.58041	1	FALSE	7.57074	7.40363	0.032202	1	1	FALSE	2.79996	3.60169	-0.36327	0.76815	1	FALSE	3.12556	6.73209	-1.1069	0.32134	0.96429	FALSE	3.07238	6.50917	-1.0831	0.38087
MD05G1190100_novel04	MD05G1190100	Novel_lncRNA	588	4	{NA}	{NA}	{NA}	{NA}	{NA}	{XM_018642899.1; PREDICTED: Pyrus x bretschneideri K(+) efflux antiporter 6-like (LOC108865667), transcript variant X1, mRNA}	{NA}	6.40333	5.31	2.99333	0	1.0477	0.902715	0.21488	1	1	FALSE	0.545996	1.07835	-0.98186	0.89057	1	FALSE	0.592196	0.982613	-0.73055	0.97721	1	FALSE	0	0.955559	#NAME?	0.56309	0.93548	FALSE	0	0.532001	#NAME?	0.66865	1	FALSE	0	0.861738	#NAME?	0.46223
MD05G1195300_novel01	MD05G1195300	Novel_lncRNA	796	1	{NA}	{NA}	{NA}	{NA}	{NA}	{NA}	{NA}	4.01333	7.52	0	2.69667	2.52664	0.955561	1.4028	0.54505	0.85195	FALSE	0	2.60433	#NAME?	0.19711	1	FALSE	0	1.04022	#NAME?	0.32861	0.64548	FALSE	0.680507	2.30698	-1.7613	0.51982	0.92952	FALSE	0.740096	0	Inf	0.60483	1	FALSE	0.723023	0.915368	-0.34031	1
MD05G1196300_novel03	MD05G1196300	Novel_lncRNA	499	1	{NA}	{NA}	{NA}	{NA}	{NA}	{XM_008347952.2; PREDICTED: Malus x domestica mitochondrial inner membrane protease subunit 2-like (LOC103409136), mRNA}	{NA}	985.493	1138.38	1182.41	978.37	197.434	104.805	0.91366	0.10949	0.39195	FALSE	168.533	202.827	-0.26722	0.6793	1	FALSE	183.752	114.403	0.68364	0.11535	0.37351	FALSE	118.774	179.417	-0.5951	0.34724	0.87513	FALSE	131.609	163.818	-0.31583	0.47933	0.98512	FALSE	128.877	100.374	0.3606	0.42875
MD05G1208600_novel01	MD05G1208600	Novel_lncRNA	1432	1	{XP_009366630.1; PREDICTED: uncharacterized protein LOC103956386 [Pyrus x bretschneideri]}	{NA}	{mdm:103445527; - - - - -}	{NA}	{NA}	{XM_017330291.1; PREDICTED: Malus x domestica interactor of constitutive active ROPs 1-like (LOC103427994), transcript variant X2, mRNA}	{NA}	36.84	2.55667	5.97	2.86	1.74616	18.776	-3.4266	0.00099182	0.017985	TRUE	4.15053	1.79725	1.2075	0.45782	1	FALSE	4.52337	20.5547	-2.184	0.010843	0.07757	FALSE	1.57451	1.5926	-0.016484	1	1	FALSE	1.72047	4.05798	-1.238	0.41667	0.98512	FALSE	1.6744	18.0022	-3.4265	0.00047925
MD05G1213300_novel06	MD05G1213300	Novel_lncRNA	2066	1	{ONH90327.1; hypothetical protein PRUPE_8G046700 [Prunus persica]}	{NA}	{NA}	{NA}	{NA}	{AY603367.1; Malus x domestica isolate 2 retrotransposon Cassandra, complete sequence}	{NA}	158.433	154.233	176.717	167.713	192.191	123.993	0.63228	0.24716	0.58278	FALSE	181.404	197.173	-0.12026	0.82982	1	FALSE	197.742	135.402	0.54637	0.20304	0.51162	FALSE	146.537	174.409	-0.2512	0.666	0.95685	FALSE	162.518	176.382	-0.1181	0.77248	1	FALSE	159.126	118.739	0.42238	0.35128
MD05G1215500_novel02	MD05G1215500	Novel_lncRNA	1937	3	{XP_009362689.1; PREDICTED: uncharacterized protein LOC103952743 isoform X3 [Pyrus x bretschneideri]}	{NA}	{NA}	{NA}	{NA}	{XR_529530.2; PREDICTED: Malus x domestica uncharacterized LOC103436187 (LOC103436187), ncRNA}	{NA}	185.113	159	157.053	142.717	192.283	134.471	0.51593	0.40369	0.7424	FALSE	149.993	197.785	-0.39904	0.51327	1	FALSE	163.756	146.834	0.15737	0.80376	0.94637	FALSE	114.322	174.948	-0.61383	0.39008	0.88922	FALSE	126.046	145.443	-0.20651	0.77922	1	FALSE	123.145	128.772	-0.064452	0.95581
MD05G1215500_novel03	MD05G1215500	Novel_lncRNA	1795	3	{XP_009362689.1; PREDICTED: uncharacterized protein LOC103952743 isoform X3 [Pyrus x bretschneideri]}	{NA}	{NA}	{NA}	{NA}	{XR_529530.2; PREDICTED: Malus x domestica uncharacterized LOC103436187 (LOC103436187), ncRNA}	{NA}	198.953	130.623	158.307	175.347	140.522	132.329	0.086666	0.89297	0.99932	FALSE	135.327	144.322	-0.092845	0.94501	1	FALSE	147.25	144.552	0.026687	0.8806	0.98798	FALSE	129.862	127.66	0.024666	0.93571	1	FALSE	143.786	131.624	0.1275	0.8229	1	FALSE	140.617	126.719	0.15014	0.71252
MD05G1234900_novel07	MD05G1234900	Novel_lncRNA	265	1	{NA}	{NA}	{NA}	{NA}	{NA}	{XM_008373771.2; PREDICTED: Malus x domestica DCN1-like protein 1 (LOC103435380), mRNA}	{NA}	2205.41	1871.4	2518.32	3338.26	37.0398	27.0046	0.45587	0.48375	0.80349	FALSE	45.4063	38.0244	0.25597	0.77213	1	FALSE	49.5785	29.5334	0.74737	0.20229	0.51162	FALSE	51.8919	33.6451	0.62511	0.34452	0.87353	FALSE	57.4944	44.0359	0.38474	0.41272	0.98512	FALSE	56.239	25.8768	1.1199	0.032922
MD05G1240600_novel08	MD05G1240600	Novel_lncRNA	2909	3	{XP_008373182.1; PREDICTED: glutamic acid-rich protein-like [Malus domestica]}	{NA}	{NA}	{NA}	{NA}	{XR_001952549.1; PREDICTED: Pyrus x bretschneideri uncharacterized LOC103939970 (LOC103939970), transcript variant X2, ncRNA}	{NA}	34.33	35.6967	33.88	36.6833	67.6357	39.3739	0.78054	0.21768	0.53913	FALSE	50.8184	69.4597	-0.45082	0.51041	1	FALSE	55.3791	43.074	0.36252	0.46365	0.76321	FALSE	46.4442	61.4306	-0.40346	0.56584	0.93548	FALSE	51.292	49.427	0.053435	0.93785	1	FALSE	50.1517	37.7332	0.41046	0.42276
MD05G1241300_novel05	MD05G1241300	Novel_lncRNA	1789	2	{NA}	{NA}	{NA}	{NA}	{NA}	{XR_525072.2; PREDICTED: Malus x domestica uncharacterized LOC103409027 (LOC103409027), transcript variant X1, ncRNA}	{NA}	208.763	98.74	133.86	138.337	100.924	137.975	-0.45113	0.44474	0.77436	FALSE	114.923	103.622	0.14934	0.78055	1	FALSE	125.116	150.732	-0.26872	0.59803	0.84554	FALSE	102.391	91.6898	0.15925	0.80399	1	FALSE	113.518	111.791	0.022119	0.99873	1	FALSE	111.089	132.108	-0.25001	0.57412
MD05G1242900_novel03	MD05G1242900	Novel_lncRNA	289	1	{NA}	{NA}	{NA}	{NA}	{NA}	{XM_008366013.2; PREDICTED: Malus x domestica 40S ribosomal protein S4 (LOC103427928), mRNA}	{NA}	9406	3057.31	5567.95	7636.49	95.4543	182.245	-0.93299	0.12181	0.41404	FALSE	153.5	97.9242	0.6485	0.29758	1	FALSE	167.2	198.725	-0.24919	0.60546	0.85143	FALSE	183.822	86.6477	1.0851	0.10601	0.73696	FALSE	202.646	149.152	0.44218	0.41005	0.98512	FALSE	198.455	174.376	0.18661	0.74555
MD05G1252200_novel01	MD05G1252200	Novel_lncRNA	675	4	{NA}	{NA}	{NA}	{NA}	{NA}	{XR_529393.2; PREDICTED: Malus x domestica uncharacterized LOC103435276 (LOC103435276), ncRNA}	{NA}	422.73	857.753	955.917	654.077	264.607	76.9754	1.7814	0.0053942	0.057448	FALSE	224.326	272.63	-0.28135	0.72482	1	FALSE	244.46	84.1062	1.5393	0.0007607	0.011183	TRUE	133.721	241.172	-0.85084	0.24543	0.85748	FALSE	147.828	217.407	-0.55648	0.28733	0.95378	FALSE	144.462	73.7434	0.97011	0.025202
MD05G1259800_novel01	MD05G1259800	Novel_lncRNA	1894	2	{NA}	{NA}	{NA}	{NA}	{NA}	{XR_529370.2; PREDICTED: Malus x domestica uncharacterized LOC103435219 (LOC103435219), transcript variant X3, ncRNA}	{NA}	199.51	148.823	151.023	111.493	178.529	141.481	0.33555	0.63211	0.89635	FALSE	138.996	183.695	-0.40227	0.5766	1	FALSE	151.486	154.759	-0.030837	0.94808	1	FALSE	87.3389	162.469	-0.89547	0.20012	0.83251	FALSE	96.4492	135.01	-0.48522	0.34209	0.97406	FALSE	94.2443	135.595	-0.52483	0.26955
MD05G1261200_novel01	MD05G1261200	Novel_lncRNA	654	6	{XP_008361941.1; PREDICTED: uncharacterized protein LOC103425631 [Malus domestica]}	{NA}	{NA}	{NA}	{GO:0005634; nucleus; cellular_component}	{XR_001789459.1; PREDICTED: Malus x domestica uncharacterized LOC108172880 (LOC108172880), ncRNA}	{PF04618:HD-ZIP protein N terminus}	3916.28	1481	1719.5	2415.07	407.198	673.786	-0.72656	0.19482	0.5206	FALSE	384.266	417.723	-0.12044	0.80697	1	FALSE	418.472	736.271	-0.81511	0.04708	0.2166	FALSE	464.966	369.515	0.33149	0.64098	0.95614	FALSE	511.975	372.981	0.45697	0.38043	0.98143	FALSE	500.883	645.212	-0.3653	0.42467
MD05G1279200_novel03	MD05G1279200	Novel_lncRNA	820	1	{NA}	{NA}	{NA}	{NA}	{NA}	{XM_017325149.1; PREDICTED: Malus x domestica auxin response factor 6-like (LOC103408984), mRNA}	{NA}	2306.33	728.05	1171.34	994.693	274.762	566.642	-1.0443	0.069002	0.3116	FALSE	377.6	281.973	0.4213	0.45915	1	FALSE	411.271	618.995	-0.58984	0.19517	0.50685	FALSE	271.095	249.497	0.11977	0.80354	1	FALSE	299.234	367.553	-0.29668	0.57844	1	FALSE	292.031	542.997	-0.89482	0.081838
MD05G1306900_novel01	MD05G1306900	Novel_lncRNA	241	1	{NA}	{NA}	{NA}	{NA}	{NA}	{XM_008373212.2; PREDICTED: Malus x domestica pathogenesis-related genes transcriptional activator PTI5-like (LOC103434849), mRNA}	{NA}	224.18	814.177	801.62	3595.64	8.66778	1.58764	2.4488	0.036959	0.21667	FALSE	8.4801	8.86381	-0.063846	0.82677	1	FALSE	9.32282	1.72727	2.4323	0.43515	0.73231	FALSE	31.2287	7.83429	1.995	0.019336	0.34606	FALSE	34.7351	8.16992	2.088	0.021887	0.58778	FALSE	34.1485	1.51995	4.4897	7.0464e-05
MD05G1311400_novel01	MD05G1311400	Novel_lncRNA	202	1	{NA}	{NA}	{NA}	{NA}	{NA}	{NM_001319254.1; Malus domestica ethylene-responsive transcription factor 4 (LOC103434825), mRNA}	{NA}	1719.51	1131.54	243.523	1937.24	2.63871	2.76765	-0.068828	1	1	FALSE	0.545996	2.69515	-2.3034	0.22326	1	FALSE	0.592196	3.02509	-2.3528	0.20947	0.52022	FALSE	4.10639	2.38122	0.78617	0.61876	0.95592	FALSE	4.48619	0.532001	3.076	0.11836	0.73016	FALSE	4.36675	2.65317	0.71885	0.51774
MD05G1318800_novel01	MD05G1318800	Novel_lncRNA	466	3	{NA}	{NA}	{NA}	{NA}	{NA}	{XR_529329.2; PREDICTED: Malus x domestica uncharacterized LOC103434759 (LOC103434759), ncRNA}	{NA}	11173.9	2421.92	7250.31	4961.97	375.8	1017.44	-1.4369	0.15582	0.46966	FALSE	821.419	386.967	1.0859	0.37935	1	FALSE	892.94	1116.45	-0.32229	0.73247	0.9201	FALSE	512.464	342.32	0.58211	0.45833	0.90458	FALSE	562.193	793.666	-0.49747	0.70489	1	FALSE	549.43	975.611	-0.82837	0.41912
MD05G1321100_novel02	MD05G1321100	Novel_lncRNA	996	2	{NA}	{NA}	{NA}	{NA}	{NA}	{XR_001788894.1; PREDICTED: Malus x domestica uncharacterized LOC108172358 (LOC108172358), ncRNA}	{NA}	94.1533	31.4767	33.81	59.8733	16.1169	30.1221	-0.90225	0.21248	0.5374	FALSE	14.0932	16.5271	-0.22983	0.76737	1	FALSE	15.3554	32.9782	-1.1028	0.083246	0.29908	FALSE	21.0921	14.6181	0.52894	0.53457	0.93142	FALSE	23.1744	13.6893	0.75948	0.31839	0.96429	FALSE	22.66	28.8727	-0.34956	0.57737
MD05G1321200	MD05G1321200	Novel_lncRNA	917	3	{CBL94147.1; hypothetical protein [Malus domestica]}	{sp|Q9C7E7|RDM16_ARATH; Protein RDM16 OS=Arabidopsis thaliana GN=RDM16 PE=2 SV=1}	{pxb:103948345; K12843 PRPF3, PRP3 U4/U6 small nuclear ribonucleoprotein PRP3 - ko03040; Genetic Information Processing; Transcription; Spliceosome}	{At1g28060; KOG2769 Putative u4/u6 small nuclear ribonucleoprotein A RNA processing and modification ;}	{NA}	{KT276927.1; Malus hybrid cultivar UDP-glycose flavonoid 3-O-glycosyltransferase (UFGT) gene, promoter region and partial cds}	{NA}	797.603	563.61	609.933	766.7	261.993	227.99	0.20056	0.70827	0.93316	FALSE	229.232	268.841	-0.22994	0.6857	1	FALSE	249.894	249.192	0.0040605	0.99881	1	FALSE	247.854	237.78	0.059864	0.96034	1	FALSE	275.336	222.733	0.30588	0.56098	1	FALSE	269.82	218.385	0.30513	0.54821
MD05G1321200_novel02	MD05G1321200	Novel_lncRNA	852	2	{CBL94147.1; hypothetical protein [Malus domestica]}	{sp|Q9C7E7|RDM16_ARATH; Protein RDM16 OS=Arabidopsis thaliana GN=RDM16 PE=2 SV=1}	{pxb:103948345; K12843 PRPF3, PRP3 U4/U6 small nuclear ribonucleoprotein PRP3 - ko03040; Genetic Information Processing; Transcription; Spliceosome}	{At1g28060; KOG2769 Putative u4/u6 small nuclear ribonucleoprotein A RNA processing and modification ;}	{NA}	{KT276927.1; Malus hybrid cultivar UDP-glycose flavonoid 3-O-glycosyltransferase (UFGT) gene, promoter region and partial cds}	{NA}	365.887	185.73	286.947	215.033	89.7076	93.917	-0.066156	0.85641	0.98974	FALSE	92.044	92.3718	-0.005129	0.89876	1	FALSE	99.9546	102.438	-0.035405	0.98969	1	FALSE	61.4506	81.6501	-0.41003	0.80099	1	FALSE	67.612	89.3513	-0.40221	0.63053	1	FALSE	65.9926	89.8546	-0.44529	0.39928
MD05G1340800_novel03	MD05G1340800	Novel_lncRNA	232	1	{XP_008385606.1; PREDICTED: uncharacterized protein LOC103448138 [Malus domestica]}	{NA}	{mdm:103448138; - - - - -}	{NA}	{NA}	{XR_529288.2; PREDICTED: Malus x domestica uncharacterized LOC103434541 (LOC103434541), transcript variant X2, misc_RNA}	{NA}	266.603	256.133	125.183	271.767	1.989	1.61739	0.29837	0.9042	1	FALSE	1.01125	2.03775	-1.0108	0.7097	1	FALSE	1.09859	1.76589	-0.68474	0.98523	1	FALSE	1.788	1.80391	-0.012784	1	1	FALSE	1.96074	0.995643	0.9777	0.65524	1	FALSE	1.90275	1.55393	0.29217	0.8477
MD05G1342400_novel01	MD05G1342400	Novel_lncRNA	541	1	{NA}	{NA}	{NA}	{NA}	{NA}	{XM_008360524.2; PREDICTED: Malus x domestica glucose-6-phosphate/phosphate translocator 2, chloroplastic-like (LOC103422461), transcript variant X1, mRNA}	{NA}	86.5033	14.0633	81.5467	50.2933	2.58107	10.6958	-2.051	0.080676	0.33864	FALSE	13.0315	2.63771	2.3046	0.033935	1	FALSE	14.1879	11.6696	0.28191	0.74444	0.92177	FALSE	7.12712	2.33374	1.6107	0.20954	0.83852	FALSE	7.90217	12.637	-0.67733	0.46873	0.98512	FALSE	7.72434	10.2366	-0.40625	0.69485
MD05G1359600_novel02	MD05G1359600	Novel_lncRNA	232	1	{NA}	{NA}	{NA}	{NA}	{NA}	{XM_008376456.2; PREDICTED: Malus x domestica U-box domain-containing protein 4 (LOC103437928), mRNA}	{NA}	0	0	0	0	0	0	NA	NA	NA	NA	0	0	NA	NA	NA	NA	0	0	NA	NA	NA	NA	0	0	NA	NA	NA	NA	0	0	NA	NA	NA	NA	0	0	NA	NA
MD05G1364600	MD05G1364600	Novel_lncRNA	278	2	{NA}	{NA}	{NA}	{NA}	{NA}	{XR_530968.2; PREDICTED: Malus x domestica uncharacterized LOC103446953 (LOC103446953), ncRNA}	{NA}	529.79	563.307	811.73	423.833	15.0956	8.63464	0.80592	0.36763	0.70529	FALSE	18.6177	15.5297	0.26165	0.68993	1	FALSE	20.2821	9.42812	1.1052	0.13056	0.40001	FALSE	8.51148	13.74	-0.6909	0.53315	0.93142	FALSE	9.42797	18.0988	-0.94087	0.26144	0.92214	FALSE	9.199	8.27295	0.15308	0.80248
MD06G1008300_novel01	MD06G1008300	Novel_lncRNA	1579	3	{XP_008349112.1; PREDICTED: uncharacterized protein LOC103412308 isoform X2 [Malus domestica]}	{NA}	{NA}	{NA}	{NA}	{XR_001791816.1; PREDICTED: Malus x domestica uncharacterized LOC103452736 (LOC103452736), transcript variant X1, ncRNA}	{NA}	397.707	150.36	219.153	181.8	132.475	228.012	-0.78339	0.19414	0.5206	FALSE	161.458	135.814	0.24953	0.71142	1	FALSE	175.791	249.267	-0.50383	0.27271	0.5838	FALSE	115.197	120.156	-0.060798	0.87799	1	FALSE	127.218	156.893	-0.30248	0.50217	0.98512	FALSE	124.447	218.492	-0.81205	0.070018
MD06G1015700_novel04	MD06G1015700	Novel_lncRNA	466	2	{XP_008360727.1; PREDICTED: uncharacterized protein LOC103424423 [Malus domestica]}	{NA}	{jcu:105632493; K02988 RP-S5, MRPS5, rpsE small subunit ribosomal protein S5 - ko03010; Genetic Information Processing; Translation; Ribosome}	{At1g64880; KOG2646 Ribosomal protein S5 J Translation, ribosomal structure and biogenesis ;}	{NA}	{XR_529591.2; PREDICTED: Malus x domestica uncharacterized LOC103436785 (LOC103436785), ncRNA}	{NA}	3224.21	1303.85	1546.75	2805.16	197.284	294.206	-0.57655	0.30895	0.65262	FALSE	186.745	202.542	-0.11715	0.85502	1	FALSE	203.378	320.748	-0.65728	0.13335	0.40334	FALSE	293.858	179.143	0.71401	0.28275	0.86303	FALSE	324.443	181.308	0.83952	0.095673	0.70621	FALSE	317.866	281.438	0.1756	0.76696
MD06G1020000_novel01	MD06G1020000	Novel_lncRNA	3227	2	{XP_009372604.2; PREDICTED: probable protein phosphatase 2C 27 [Pyrus x bretschneideri]}	{sp|Q9SD02|P2C47_ARATH; Probable protein phosphatase 2C 47 OS=Arabidopsis thaliana GN=At3g51470 PE=1 SV=1}	{pop:POPTR_0002s00880g; K14803 PTC2_3 protein phosphatase PTC2/3 3.1.3.16 -}	{At3g51470; KOG0698 Serine/threonine protein phosphatase T Signal transduction mechanisms ;}	{NA}	{XR_001789149.1; PREDICTED: Malus x domestica uncharacterized LOC108172594 (LOC108172594), ncRNA}	{NA}	3.22333	11.41	7.17667	0.396667	27.5837	4.28757	2.6856	0.19217	0.51921	FALSE	11.7207	28.5285	-1.2833	0.44572	1	FALSE	12.8155	4.67543	1.4547	0.24213	0.55901	FALSE	0.680507	25.2315	-5.2125	0.053899	0.58973	FALSE	0.740096	11.311	-3.9339	0.029422	0.5962	FALSE	0.723023	4.1025	-2.5044	0.12229
MD06G1020000_novel02	MD06G1020000	Novel_lncRNA	2287	3	{XP_009372604.2; PREDICTED: probable protein phosphatase 2C 27 [Pyrus x bretschneideri]}	{sp|Q9SD02|P2C47_ARATH; Probable protein phosphatase 2C 47 OS=Arabidopsis thaliana GN=At3g51470 PE=1 SV=1}	{pop:POPTR_0002s00880g; K14803 PTC2_3 protein phosphatase PTC2/3 3.1.3.16 -}	{At3g51470; KOG0698 Serine/threonine protein phosphatase T Signal transduction mechanisms ;}	{NA}	{XR_001789149.1; PREDICTED: Malus x domestica uncharacterized LOC108172594 (LOC108172594), ncRNA}	{NA}	0	0	0	0	0	0	NA	NA	NA	NA	0	0	NA	NA	NA	NA	0	0	NA	NA	NA	NA	0	0	NA	NA	NA	NA	0	0	NA	NA	NA	NA	0	0	NA	NA
MD06G1020000_novel03	MD06G1020000	Novel_lncRNA	1676	4	{XP_009372604.2; PREDICTED: probable protein phosphatase 2C 27 [Pyrus x bretschneideri]}	{sp|Q9SD02|P2C47_ARATH; Probable protein phosphatase 2C 47 OS=Arabidopsis thaliana GN=At3g51470 PE=1 SV=1}	{atr:18445500; K14803 PTC2_3 protein phosphatase PTC2/3 3.1.3.16 -}	{At3g51470; KOG0698 Serine/threonine protein phosphatase T Signal transduction mechanisms ;}	{NA}	{XR_001789149.1; PREDICTED: Malus x domestica uncharacterized LOC108172594 (LOC108172594), ncRNA}	{NA}	6.19	12.1333	21.4367	12.7367	11.4616	3.64727	1.6519	0.094651	0.36001	FALSE	17.6662	11.7394	0.58963	0.55658	1	FALSE	19.2959	3.98872	2.2743	0.0091956	0.070851	FALSE	8.52755	10.3824	-0.28394	0.85352	1	FALSE	9.42344	17.1397	-0.86302	0.3886	0.98337	FALSE	9.17076	3.49525	1.3916	0.15819
MD06G1021200_novel01	MD06G1021200	Novel_lncRNA	2157	2	{CBI29236.3; unnamed protein product, partial [Vitis vinifera]}	{NA}	{pper:PRUPE_ppa013644mg; - - - - -}	{NA}	{NA}	{XR_529607.2; PREDICTED: Malus x domestica uncharacterized LOC103436827 (LOC103436827), ncRNA}	{NA}	59.1633	11.6267	23.4667	29.99	15.446	48.6405	-1.6549	0.014971	0.12344	FALSE	24.2277	15.863	0.61099	0.42711	1	FALSE	26.3759	53.1017	-1.0095	0.060743	0.2564	FALSE	27.0723	14.0317	0.94813	0.22666	0.85432	FALSE	29.8149	23.469	0.34527	0.66791	1	FALSE	29.2042	46.5751	-0.67338	0.1899
MD06G1028700_novel04	MD06G1028700	Novel_lncRNA	224	1	{XP_018506727.1; PREDICTED: acetolactate synthase 1, chloroplastic-like isoform X1 [Pyrus x bretschneideri]}	{sp|P09342|ILVB1_TOBAC; Acetolactate synthase 1, chloroplastic OS=Nicotiana tabacum GN=ALS SURA PE=1 SV=1}	{pper:PRUPE_ppa002517mg; K01652 E2.2.1.6L, ilvB, ilvG, ilvI acetolactate synthase I/II/III large subunit 2.2.1.6 ko01210; Metabolism; Global and overview maps; 2-Oxocarboxylic acid metabolism | ko01230; Metabolism; Global and overview maps; Biosynthesis of amino acids | ko00650; Metabolism; Carbohydrate metabolism; Butanoate metabolism | ko00660; Metabolism; Carbohydrate metabolism; C5-Branched d…	{NA}	{NA}	{XM_008375312.2; PREDICTED: Malus x domestica acetolactate synthase 1, chloroplastic-like (LOC103436863), mRNA}	{NA}	3695.72	5261.9	9927.84	12897.4	31.7706	14.4488	1.1367	0.088927	0.35077	FALSE	56.3706	32.5538	0.79212	0.27747	1	FALSE	61.4653	15.7735	1.9623	0.00060507	0.0094376	TRUE	65.919	28.796	1.1948	0.10531	0.73696	FALSE	73.2323	54.6508	0.42224	0.48349	0.98512	FALSE	71.9127	13.8391	2.3775	0.00026234
MD06G1033800_novel01	MD06G1033800	Novel_lncRNA	1098	1	{XP_008234032.2; PREDICTED: LOW QUALITY PROTEIN: LRR receptor-like serine/threonine-protein kinase GSO1 [Prunus mume]}	{NA}	{pmum:103318922; - - - - -}	{NA}	{NA}	{XR_525168.2; PREDICTED: Malus x domestica uncharacterized LOC103409459 (LOC103409459), transcript variant X3, ncRNA}	{NA}	837.833	542.407	874.737	639.893	303.62	304.608	-0.0046857	0.8875	0.99621	FALSE	419.55	310.696	0.43334	0.5434	1	FALSE	457.326	332.66	0.45918	0.26176	0.57425	FALSE	259.534	274.826	-0.082596	0.83586	1	FALSE	286.803	407.889	-0.50812	0.31051	0.9543	FALSE	280.268	291.649	-0.057425	0.95684
MD06G1039200_novel01	MD06G1039200	Novel_lncRNA	1193	2	{NA}	{NA}	{NA}	{NA}	{NA}	{XR_001790260.1; PREDICTED: Malus x domestica uncharacterized LOC108173580 (LOC108173580), ncRNA}	{NA}	66.75	34.92	85.5933	54.05	20.6749	26.8806	-0.37869	0.68956	0.9296	FALSE	45.2144	21.1826	1.0939	0.14909	1	FALSE	49.3289	29.4267	0.74531	0.21368	0.52357	FALSE	24.3809	18.7474	0.37906	0.71418	0.98286	FALSE	26.9503	43.8316	-0.70167	0.23473	0.90778	FALSE	26.3976	25.7505	0.035806	0.9951
MD06G1047600_novel02	MD06G1047600	Novel_lncRNA	247	1	{XP_009371043.1; PREDICTED: expansin-like B1 [Pyrus x bretschneideri]}	{NA}	{NA}	{NA}	{NA}	{XM_008375430.2; PREDICTED: Malus x domestica expansin-like B1 (LOC103436968), mRNA}	{NA}	256.803	13937	32147.4	7693.31	167.863	2.21151	6.2461	0.00067522	0.014211	TRUE	377.11	171.221	1.1391	0.18685	1	FALSE	412.006	2.41464	7.4147	2.5927e-12	4.7373e-10	TRUE	78.317	151.402	-0.95099	0.25141	0.85748	FALSE	86.7731	365.263	-2.0736	0.0010805	0.13797	FALSE	85.0137	2.12187	5.3243	7.8594e-15
MD06G1070800_novel01	MD06G1070800	Novel_lncRNA	260	2	{NA}	{NA}	{NA}	{NA}	{NA}	{XR_001951604.1; PREDICTED: Pyrus x bretschneideri uncharacterized LOC108865743 (LOC108865743), transcript variant X4, ncRNA}	{NA}	79.1867	56.3933	187.037	125.837	0.941304	0.932466	0.01361	1	1	FALSE	3.07366	0.959406	1.6797	0.35944	1	FALSE	3.34743	1.02124	1.7127	0.2467	0.56045	FALSE	1.77556	0.848352	1.0655	0.80094	1	FALSE	1.99035	2.9998	-0.59185	0.66451	1	FALSE	1.95942	0.895714	1.1293	0.66987
MD06G1077800_novel01	MD06G1077800	Novel_lncRNA	964	1	{XP_008374040.1; PREDICTED: probable DEAD-box ATP-dependent RNA helicase 48 [Malus domestica]}	{NA}	{pmum:103344156; K17679 MSS116 ATP-dependent RNA helicase MSS116, mitochondrial 3.6.4.13 -}	{NA}	{NA}	{XM_008375818.2; PREDICTED: Malus x domestica probable DEAD-box ATP-dependent RNA helicase 48 (LOC103437349), mRNA}	{NA}	97.87	25.75	229.003	775.473	11.5335	29.9206	-1.3753	0.062883	0.29842	FALSE	95.1596	11.8578	3.0045	0.20631	1	FALSE	104.41	32.6521	1.677	0.40443	0.70859	FALSE	264.556	10.4989	4.6553	1.7746e-07	0.00011295	TRUE	292.148	91.7454	1.671	0.023668	0.5962	FALSE	286.406	28.6389	3.322	1.5022e-05
MD06G1084200_novel02	MD06G1084200	Novel_lncRNA	554	1	{NA}	{NA}	{NA}	{NA}	{NA}	{XM_009348467.2; PREDICTED: Pyrus x bretschneideri uncharacterized LOC103938466 (LOC103938466), mRNA}	{NA}	336.003	398.917	280.847	307.323	88.7313	43.3179	1.0345	0.094953	0.36009	FALSE	48.9204	91.1385	-0.89763	0.15133	1	FALSE	53.3892	47.2499	0.17624	0.77927	0.94079	FALSE	45.2995	80.5869	-0.83105	0.19767	0.83251	FALSE	50.1602	47.4923	0.07885	0.90942	1	FALSE	49.142	41.4464	0.24571	0.68782
MD06G1090900_novel01	MD06G1090900	Novel_lncRNA	2026	1	{XP_008375965.1; PREDICTED: DET1- and DDB1-associated protein 1 [Malus domestica]}	{NA}	{pop:POPTR_0001s09870g; K11792 DDA1 DET1- and DDB1-associated protein 1 - -}	{NA}	{NA}	{XR_001790515.1; PREDICTED: Malus x domestica DET1- and DDB1-associated protein 1 (LOC103439199), transcript variant X2, misc_RNA}	{NA}	65.3233	60.13	73.7067	69.27	72.8313	50.1838	0.53734	0.3535	0.68763	FALSE	74.2814	74.7526	-0.0091218	0.9672	1	FALSE	81.036	54.7832	0.56483	0.23812	0.55475	FALSE	58.7173	66.1286	-0.17149	0.77798	1	FALSE	64.8941	72.1581	-0.15307	0.77468	1	FALSE	63.5071	48.0694	0.4018	0.40814
MD06G1096900_novel02	MD06G1096900	Novel_lncRNA	2107	5	{XP_008362749.1; PREDICTED: protein trichome birefringence-like 33 [Malus domestica]}	{NA}	{NA}	{NA}	{NA}	{AM167520.1; Malus x domestica transposon gene for putative DNA topoisomerase II, hypothetical protein, putative CC-NBS-LRR resistance protein, and putative cyclin-related protein}	{NA}	313.83	227.8	331.027	179.96	288.583	251.019	0.20119	0.68663	0.92662	FALSE	344.306	296.042	0.21789	0.71024	1	FALSE	375.016	274.368	0.45084	0.25947	0.57425	FALSE	158.729	261.871	-0.72229	0.27501	0.86303	FALSE	174.998	334.833	-0.9361	0.059762	0.64311	FALSE	170.76	240.48	-0.49395	0.33602
MD06G1106900_novel01	MD06G1106900	Novel_lncRNA	1782	7	{XP_018501286.1; PREDICTED: uncharacterized protein LOC103940374 isoform X6 [Pyrus x bretschneideri]}	{NA}	{NA}	{NA}	{NA}	{XR_001786769.1; PREDICTED: Malus x domestica uncharacterized LOC108170414 (LOC108170414), ncRNA}	{NA}	137.503	106.183	165.387	113.39	113.912	90.9555	0.32468	0.5839	0.87366	FALSE	144.095	116.993	0.30059	0.65067	1	FALSE	157.319	99.393	0.66248	0.16533	0.4567	FALSE	83.0803	103.484	-0.31683	0.67011	0.95854	FALSE	91.9143	139.794	-0.60494	0.26357	0.92214	FALSE	89.8202	87.1394	0.043713	0.86294
MD06G1106900_novel02	MD06G1106900	Novel_lncRNA	1317	4	{XP_018501286.1; PREDICTED: uncharacterized protein LOC103940374 isoform X6 [Pyrus x bretschneideri]}	{NA}	{NA}	{NA}	{NA}	{XR_001786769.1; PREDICTED: Malus x domestica uncharacterized LOC108170414 (LOC108170414), ncRNA}	{NA}	114.273	87.51	103.63	122.527	65.7191	52.2151	0.33185	0.58449	0.87366	FALSE	61.3419	67.438	-0.13669	0.83092	1	FALSE	66.8114	57.0613	0.22758	0.64202	0.87623	FALSE	62.8116	59.6419	0.074705	0.85709	1	FALSE	69.6052	59.564	0.22475	0.59817	1	FALSE	67.9881	50.0094	0.44308	0.3104
MD06G1106900_novel03	MD06G1106900	Novel_lncRNA	1255	4	{XP_018501286.1; PREDICTED: uncharacterized protein LOC103940374 isoform X6 [Pyrus x bretschneideri]}	{NA}	{NA}	{NA}	{NA}	{XR_001786769.1; PREDICTED: Malus x domestica uncharacterized LOC108170414 (LOC108170414), ncRNA}	{NA}	0.93	0	0.3	0	0	0.323479	#NAME?	1	1	FALSE	0.252812	0	Inf	1	1	FALSE	0.274648	0.353178	-0.36281	1	1	FALSE	0	0	NA	NA	NA	NA	0	0.248911	#NAME?	1	1	FALSE	0	0.310785	#NAME?	1
MD06G1106900_novel06	MD06G1106900	Novel_lncRNA	1807	3	{NA}	{NA}	{NA}	{NA}	{NA}	{XR_001786769.1; PREDICTED: Malus x domestica uncharacterized LOC108170414 (LOC108170414), ncRNA}	{NA}	31.58	22.4867	34.2833	21.3033	25.275	21.0269	0.26548	0.79937	0.97959	FALSE	30.5206	26.0485	0.22858	0.67987	1	FALSE	33.3125	22.9003	0.5407	0.39328	0.70057	FALSE	15.7763	23.0445	-0.54667	0.60437	0.94982	FALSE	17.5351	29.6129	-0.75598	0.29883	0.95378	FALSE	17.1418	20.1134	-0.23064	0.82594
MD06G1120500_novel01	MD06G1120500	Novel_lncRNA	2877	1	{NA}	{NA}	{NA}	{NA}	{NA}	{XR_668193.1; PREDICTED: Pyrus x bretschneideri uncharacterized LOC103954444 (LOC103954444), ncRNA}	{NA}	223.27	127.473	156.86	211.883	226.548	252.317	-0.15542	0.82978	0.98598	FALSE	227.701	232.327	-0.029019	0.92478	1	FALSE	247.967	275.522	-0.15202	0.73669	0.9201	FALSE	264.544	205.519	0.36424	0.60766	0.95031	FALSE	292.016	221.074	0.40152	0.41779	0.98512	FALSE	285.774	241.566	0.24245	0.61222
MD06G1121300_novel01	MD06G1121300	Novel_lncRNA	1515	3	{NA}	{NA}	{NA}	{NA}	{NA}	{XR_001786776.1; PREDICTED: Malus x domestica uncharacterized LOC103409625 (LOC103409625), transcript variant X1, ncRNA}	{NA}	572.763	780.54	900.42	651.19	697.442	310.794	1.1661	0.030822	0.19818	FALSE	646.635	715.114	-0.14522	0.795	1	FALSE	704.781	339.42	1.0541	0.0097315	0.073216	FALSE	394.632	632.372	-0.68027	0.31713	0.86303	FALSE	436.736	629.188	-0.52673	0.32946	0.96429	FALSE	426.246	297.527	0.51867	0.22271
MD06G1121300_novel02	MD06G1121300	Novel_lncRNA	2264	2	{XP_008357909.1; PREDICTED: uncharacterized protein LOC103421641 [Malus domestica]}	{NA}	{vvi:100247426; - - - - -}	{NA}	{NA}	{XR_001786776.1; PREDICTED: Malus x domestica uncharacterized LOC103409625 (LOC103409625), transcript variant X1, ncRNA}	{NA}	122.893	99.1233	143.907	102.06	137.82	106.944	0.36593	0.50267	0.81383	FALSE	164.66	141.419	0.21951	0.70071	1	FALSE	179.468	116.876	0.61875	0.14263	0.42325	FALSE	97.9544	125.089	-0.35277	0.66746	0.95685	FALSE	108.145	160.267	-0.56751	0.32732	0.96429	FALSE	105.387	102.471	0.040479	0.75913
MD06G1121700_novel04	MD06G1121700	Novel_lncRNA	202	1	{NA}	{NA}	{NA}	{NA}	{NA}	{XM_008375909.2; PREDICTED: Malus x domestica polyadenylate-binding protein-interacting protein 11-like (LOC103437441), mRNA}	{NA}	1023.79	1955.09	1705.44	1140.93	4.54569	1.5348	1.5665	0.24691	0.58278	FALSE	3.95322	4.64471	-0.23256	0.85784	1	FALSE	4.30007	1.66966	1.3648	0.2916	0.60893	FALSE	2.40512	4.10779	-0.77225	0.62884	0.95614	FALSE	2.63595	3.84907	-0.54619	0.80723	1	FALSE	2.5592	1.46632	0.80349	0.56412
MD06G1124800_novel05	MD06G1124800	Novel_lncRNA	364	1	{NA}	{NA}	{NA}	{NA}	{NA}	{NM_001293935.1; Malus domestica uncharacterized LOC103438687 (NAC8), mRNA}	{NA}	736.78	960.86	582.543	829.95	85.1867	35.4128	1.2664	0.30709	0.65084	FALSE	38.7362	87.9272	-1.1826	0.35433	1	FALSE	42.2212	38.6244	0.12845	0.81333	0.95348	FALSE	47.848	77.7608	-0.70058	0.55305	0.93548	FALSE	53.1561	37.6425	0.49787	0.41531	0.98512	FALSE	52.1184	33.8826	0.62125	0.27011
MD06G1125000_novel01	MD06G1125000	Novel_lncRNA	391	2	{XP_008375452.1; PREDICTED: dolichol-phosphate mannosyltransferase subunit 1 [Malus domestica]}	{sp|Q9VIU7|DPM1_DROME; Probable dolichol-phosphate mannosyltransferase OS=Drosophila melanogaster GN=CG10166 PE=3 SV=1}	{sind:105164135; K00721 DPM1 dolichol-phosphate mannosyltransferase 2.4.1.83 ko00510; Metabolism; Glycan biosynthesis and metabolism; N-Glycan biosynthesis}	{At1g20570_1; KOG2978 Dolichol-phosphate mannosyltransferase R General function prediction only ;}	{NA}	{XM_008377230.2; PREDICTED: Malus x domestica dolichol-phosphate mannosyltransferase subunit 1 (LOC103438685), mRNA}	{NA}	2682.31	1338.73	1303.3	1917.43	139.458	160.991	-0.20715	0.65198	0.90463	FALSE	103.903	143.508	-0.4659	0.50595	1	FALSE	113.204	175.731	-0.63444	0.15712	0.4483	FALSE	133.796	126.914	0.076191	0.87816	1	FALSE	148.047	100.807	0.55446	0.2831	0.94861	FALSE	145.124	154.179	-0.087329	0.77802
MD06G1129300_novel01	MD06G1129300	Novel_lncRNA	2196	6	{XP_017185866.1; PREDICTED: uncharacterized protein LOC108172613 [Malus domestica]}	{NA}	{pmum:103321541; K01094 GEP4 phosphatidylglycerophosphatase GEP4 3.1.3.27 ko00564; Metabolism; Lipid metabolism; Glycerophospholipid metabolism}	{At3g58830; KOG2961 Predicted hydrolase (HAD superfamily) R General function prediction only ;}	{NA}	{XR_531183.2; PREDICTED: Malus x domestica uncharacterized LOC103448281 (LOC103448281), ncRNA}	{NA}	38.2633	29.2167	40.0967	26.19	35.406	32.0515	0.1436	0.81548	0.98432	FALSE	42.9922	36.3088	0.24376	0.81146	1	FALSE	46.8124	35.0501	0.41747	0.43245	0.73172	FALSE	24.5152	32.1397	-0.39068	0.74121	0.99637	FALSE	27.0689	41.72	-0.6241	0.38043	0.98143	FALSE	26.3705	30.7224	-0.22037	0.87846
MD06G1129300_novel02	MD06G1129300	Novel_lncRNA	1793	6	{XP_017185866.1; PREDICTED: uncharacterized protein LOC108172613 [Malus domestica]}	{NA}	{pmum:103321541; K01094 GEP4 phosphatidylglycerophosphatase GEP4 3.1.3.27 ko00564; Metabolism; Lipid metabolism; Glycerophospholipid metabolism}	{At3g58830; KOG2961 Predicted hydrolase (HAD superfamily) R General function prediction only ;}	{NA}	{XR_531183.2; PREDICTED: Malus x domestica uncharacterized LOC103448281 (LOC103448281), ncRNA}	{NA}	62.9467	43.07	87.3833	47.6333	44.5203	41.9502	0.085786	0.87671	0.99464	FALSE	74.5858	45.6642	0.70784	0.28181	1	FALSE	81.2311	45.9276	0.82267	0.09194	0.31868	FALSE	34.7492	40.399	-0.21734	0.85685	1	FALSE	38.2629	72.4157	-0.92036	0.1288	0.7535	FALSE	37.2353	40.2149	-0.11106	0.99849
MD06G1129300_novel03	MD06G1129300	Novel_lncRNA	1459	6	{XP_017185866.1; PREDICTED: uncharacterized protein LOC108172613 [Malus domestica]}	{NA}	{pmum:103342100; - - - - -}	{At3g58830; KOG2961 Predicted hydrolase (HAD superfamily) R General function prediction only ;}	{NA}	{XR_001789377.1; PREDICTED: Malus x domestica uncharacterized LOC103430061 (LOC103430061), transcript variant X1, ncRNA}	{NA}	113.447	37.3967	56.91	110.657	31.4302	59.1382	-0.91194	0.18663	0.51073	FALSE	39.0979	32.1903	0.28047	0.80126	1	FALSE	42.7033	64.4175	-0.5931	0.21421	0.52385	FALSE	63.7993	28.4652	1.1643	0.093397	0.71194	FALSE	70.5509	37.9209	0.89567	0.075461	0.66919	FALSE	69.0339	56.5799	0.28702	0.52892
MD06G1134900_novel14	MD06G1134900	Novel_lncRNA	1046	6	{XP_006447526.1; hypothetical protein CICLE_v10016039mg [Citrus clementina]}	{sp|Q9SRV7|SY131_ARATH; Putative syntaxin-131 OS=Arabidopsis thaliana GN=SYP131 PE=3 SV=1}	{mdm:103449423; K08486 STX1B_2_3 syntaxin 1B/2/3 - ko04130; Genetic Information Processing; Folding, sorting and degradation; SNARE interactions in vesicular transport | ko04721; Organismal Systems; Nervous system; Synaptic vesicle cycle}	{At3g03800; KOG0810 SNARE protein Syntaxin 1 and related proteins U Intracellular trafficking, secretion, and vesicular transport ;}	{NA}	{XR_531832.2; PREDICTED: Malus x domestica uncharacterized LOC103453245 (LOC103453245), ncRNA}	{NA}	2337.76	1324.32	1716.51	1620.31	757.56	798.406	-0.075763	0.85673	0.98974	FALSE	764.944	778.375	-0.02511	0.97784	1	FALSE	833.343	872.076	-0.065542	0.90265	0.9987	FALSE	619.642	688.39	-0.15179	0.86419	1	FALSE	685.985	743.413	-0.11599	0.81958	1	FALSE	670.924	764.576	-0.18851	0.7229
MD06G1137700_novel02	MD06G1137700	Novel_lncRNA	212	1	{NA}	{NA}	{NA}	{NA}	{NA}	{XM_008375993.2; PREDICTED: Malus x domestica 60S ribosomal protein L7a-1-like (LOC103437516), transcript variant X2, mRNA}	{NA}	7269.21	4055.27	4792.55	4333.68	15.6844	16.9373	-0.11087	0.91012	1	FALSE	17.3124	16.1056	0.10424	0.96568	1	FALSE	18.8835	18.4913	0.030278	1	1	FALSE	14.153	14.2491	-0.0097705	1	1	FALSE	15.5936	16.7774	-0.10557	0.97707	1	FALSE	15.2398	16.2071	-0.088787	0.94291
MD06G1146600_novel01	MD06G1146600	Novel_lncRNA	1739	2	{NA}	{NA}	{NA}	{NA}	{NA}	{HE805490.1; Malus x robusta DNA fragment spanning resistance locus against Erwinia amylovora on linkage group 3, clone 16k15 contig4/4}	{NA}	0	0.566667	1.58	2.08	0.592072	0	Inf	0.60158	0.87762	FALSE	1.17274	0.599957	0.96695	0.94071	1	FALSE	1.27019	0	Inf	0.48782	0.77952	FALSE	1.49505	0.529832	1.4966	0.77066	1	FALSE	1.66011	1.13236	0.55195	1	1	FALSE	1.63606	0	Inf	0.19153
MD06G1159900_novel08	MD06G1159900	Novel_lncRNA	458	5	{XP_018501109.1; PREDICTED: uncharacterized protein LOC103939662 [Pyrus x bretschneideri]}	{NA}	{NA}	{NA}	{NA}	{XR_001790257.1; PREDICTED: Malus x domestica uncharacterized LOC103437630 (LOC103437630), transcript variant X1, ncRNA}	{NA}	265.147	156.747	154.33	144.607	23.5819	23.3589	0.013706	0.94451	1	FALSE	18.4562	24.1321	-0.38685	0.57436	1	FALSE	20.1105	25.5247	-0.34395	0.63726	0.87394	FALSE	14.7919	21.3299	-0.52807	0.46765	0.90968	FALSE	16.4192	17.962	-0.12957	0.86506	1	FALSE	16.0668	22.3699	-0.47748	0.48327
MD06G1166600_novel08	MD06G1166600	Novel_lncRNA	283	1	{NA}	{NA}	{NA}	{NA}	{NA}	{XM_008367435.2; PREDICTED: Malus x domestica DEAD-box ATP-dependent RNA helicase 20-like (LOC103429292), transcript variant X1, mRNA}	{NA}	4506.41	4532.83	4902.13	4652.16	136.445	77.6975	0.81238	0.19512	0.5206	FALSE	126.314	140.337	-0.15188	0.8849	1	FALSE	137.772	84.8527	0.69925	0.12587	0.39556	FALSE	102.19	124.123	-0.28051	0.67296	0.95854	FALSE	113.287	122.85	-0.11691	0.72937	1	FALSE	111.058	74.3623	0.57867	0.25438
MD06G1173700_novel02	MD06G1173700	Novel_lncRNA	518	1	{XP_017192972.1; PREDICTED: serine/threonine-protein kinase ATM-like [Malus domestica]}	{NA}	{fve:101295891; K04728 ATM, TEL1 ataxia telangiectasia mutated family protein 2.7.11.1 ko03440; Genetic Information Processing; Replication and repair; Homologous recombination | ko04064; Environmental Information Processing; Signal transduction; NF-kappa B signaling pathway | ko04068; Environmental Information Processing; Signal transduction; FoxO signaling pathway | ko04110; Cellular Processes;…	{At3g48190; KOG0892 Protein kinase ATM/Tel1, involved in telomere length regulation and DNA repair TBLD Signal transduction mechanisms ; Chromatin structure and dynamics ; Replication, recombination and repair ; Cell cycle control, cell division, chromosome partitioning ;}	{NA}	{XM_017333023.1; PREDICTED: Malus x domestica serine/threonine-protein kinase ATM-like (LOC103438130), mRNA}	{NA}	1199.91	2132.25	1486.22	1164.63	414.166	136.329	1.6031	0.087845	0.34865	FALSE	235.805	423.555	-0.84495	0.29826	1	FALSE	257.472	149.083	0.7883	0.22853	0.54329	FALSE	152.386	374.342	-1.2966	0.13716	0.78796	FALSE	169.047	229.575	-0.44154	0.48129	0.98512	FALSE	165.434	130.58	0.34132	0.45413
MD06G1173800_novel08	MD06G1173800	Novel_lncRNA	913	1	{NA}	{NA}	{NA}	{NA}	{NA}	{XM_008376212.2; PREDICTED: Malus x domestica probable inactive poly [ADP-ribose] polymerase SRO5 (LOC103437716), mRNA}	{NA}	199.41	6745.09	3444.38	3447.51	3476.28	57.2657	5.9237	0.00034723	0.0085338	TRUE	1341.54	3578.7	-1.4155	0.20655	1	FALSE	1465.79	62.487	4.552	6.5673e-05	0.0015196	TRUE	1116.13	3163.94	-1.5032	0.19154	0.83251	FALSE	1243.66	1304.94	-0.069396	0.93939	1	FALSE	1218.28	54.8721	4.4726	0.0010268
MD06G1215400_novel01	MD06G1215400	Novel_lncRNA	223	1	{XP_017188164.1; PREDICTED: uncharacterized protein LOC108173508 [Malus domestica]}	{NA}	{jcu:105630252; K11805 WDR68, HAN11 WD repeat-containing protein 68 - -}	{At1g12910; KOG0290 Conserved WD40 repeat-containing protein AN11 S Function unknown ;}	{NA}	{XM_008365496.2; PREDICTED: Malus x domestica uncharacterized LOC103427443 (LOC103427443), mRNA}	{NA}	575.937	306.843	161.267	125.833	2.15623	2.20485	-0.03217	0.97861	1	FALSE	0.970423	2.23819	-1.2056	0.80007	1	FALSE	1.06444	2.395	-1.1699	0.50715	0.78921	FALSE	0.617126	1.9793	-1.6814	0.76268	1	FALSE	0.675209	0.940159	-0.47757	1	1	FALSE	0.656444	2.10754	-1.6828	0.49982
MD06G1218100_novel01	MD06G1218100	Novel_lncRNA	267	1	{XP_008374775.1; PREDICTED: AP-3 complex subunit delta-like [Malus domestica]}	{NA}	{pxb:103938994; K12396 AP3D AP-3 complex subunit delta - ko04142; Cellular Processes; Transport and catabolism; Lysosome}	{NA}	{NA}	{XM_008376553.2; PREDICTED: Malus x domestica AP-3 complex subunit delta-like (LOC103438014), mRNA}	{NA}	3727.58	2358.87	2963.96	3127.78	48.6692	47.6222	0.031377	0.88671	0.99621	FALSE	55.1534	49.8619	0.14551	0.91562	1	FALSE	60.1523	51.9368	0.21186	0.68652	0.8944	FALSE	50.4718	44.1017	0.19464	0.85559	1	FALSE	55.6961	53.5436	0.056863	0.93282	1	FALSE	54.5177	45.5795	0.25834	0.62632
MD07G1011300_novel03	MD07G1011300	Novel_lncRNA	613	2	{XP_009354754.1; PREDICTED: nuclear transcription factor Y subunit A-1-like isoform X1 [Pyrus x bretschneideri]}	{NA}	{pxb:103945884; K08064 NFYA nuclear transcription factor Y, alpha - ko04612; Organismal Systems; Immune system; Antigen processing and presentation | ko05152; Human Diseases; Infectious diseases: Bacterial; Tuberculosis}	{NA}	{NA}	{XM_008348710.2; PREDICTED: Malus x domestica nuclear transcription factor Y subunit A-4-like (LOC103409923), mRNA}	{NA}	2486.71	339.053	657.997	763.593	81.9613	383.311	-2.2255	0.00015898	0.0047571	TRUE	132.248	84.1337	0.65249	0.28931	1	FALSE	143.999	418.419	-1.5389	0.00044864	0.0073566	TRUE	133.769	74.443	0.84553	0.20693	0.83852	FALSE	147.998	128.39	0.20505	0.74503	1	FALSE	145.029	366.845	-1.3388	0.0025639
MD07G1024600_novel01	MD07G1024600	Novel_lncRNA	3853	1	{NA}	{NA}	{NA}	{NA}	{NA}	{XR_001788181.1; PREDICTED: Malus x domestica uncharacterized LOC103423047 (LOC103423047), transcript variant X1, ncRNA}	{NA}	53.3433	30.3733	30.2633	28.9567	81.4427	82.9099	-0.025759	0.85112	0.98974	FALSE	60.3068	83.9085	-0.4765	0.57664	1	FALSE	65.6521	90.574	-0.46425	0.35406	0.66999	FALSE	49.8483	74.2139	-0.57414	0.48661	0.91345	FALSE	55.1442	58.6039	-0.087788	0.89024	1	FALSE	53.8996	79.4084	-0.55902	0.26846
MD07G1038300_novel08	MD07G1038300	Novel_lncRNA	428	2	{XP_008364734.1; PREDICTED: F-box protein At3g54460-like [Malus domestica]}	{NA}	{pmum:103344176; - - - - -}	{NA}	{NA}	{XM_008366512.2; PREDICTED: Malus x domestica F-box protein At3g54460-like (LOC103428409), transcript variant X1, mRNA}	{NA}	1240.79	822.38	958.19	938.86	102.257	93.2373	0.13322	0.84441	0.98974	FALSE	97.6722	105.049	-0.10504	0.89654	1	FALSE	106.458	101.82	0.064264	0.8901	0.9893	FALSE	82.4716	92.9234	-0.17214	0.81468	1	FALSE	91.5022	94.9185	-0.052884	0.90856	1	FALSE	89.5705	89.258	0.0050421	1
MD07G1057600	MD07G1057600	Novel_lncRNA	583	3	{NA}	{NA}	{NA}	{NA}	{NA}	{NA}	{NA}	3515.07	2689.21	2131.53	5425.6	672.488	499.605	0.42872	0.69641	0.93316	FALSE	393.455	694.1	-0.81895	0.40471	1	FALSE	428.908	546.449	-0.34942	0.34354	0.66562	FALSE	859.374	613.985	0.48508	0.42808	0.90298	FALSE	944.269	381.2	1.3087	0.067484	0.64311	FALSE	922.457	478.75	0.94621	0.1522
MD07G1070800_novel04	MD07G1070800	Novel_lncRNA	288	1	{NA}	{NA}	{NA}	{NA}	{NA}	{NA}	{NA}	1632.47	649.213	993.39	2287.46	22.244	31.0857	-0.48283	0.4134	0.74728	FALSE	27.5121	22.9043	0.26445	0.68775	1	FALSE	30.0512	33.9306	-0.17517	0.68481	0.89375	FALSE	54.8917	20.2521	1.4385	0.043963	0.53812	FALSE	61.0341	26.6543	1.1952	0.079674	0.66977	FALSE	59.9931	29.7551	1.0117	0.14117
MD07G1089700_novel01	MD07G1089700	Novel_lncRNA	1495	2	{XP_018500079.1; PREDICTED: protein TRIGALACTOSYLDIACYLGLYCEROL 4, chloroplastic-like [Pyrus x bretschneideri]}	{NA}	{csv:101205636; - - - - -}	{NA}	{NA}	{XR_531043.2; PREDICTED: Malus x domestica uncharacterized LOC103447317 (LOC103447317), transcript variant X2, ncRNA}	{NA}	50.9733	29.4167	36.74	34.2967	24.0993	27.3792	-0.18409	0.82569	0.98598	FALSE	25.316	24.759	0.032095	0.94683	1	FALSE	27.5516	29.8768	-0.11689	0.93127	1	FALSE	20.4094	21.9112	-0.10243	0.95502	1	FALSE	22.561	24.6137	-0.12563	0.8789	1	FALSE	22.0413	26.2172	-0.2503	0.76655
MD07G1095400_novel01	MD07G1095400	Novel_lncRNA	375	3	{NA}	{NA}	{NA}	{NA}	{NA}	{XR_001791272.1; PREDICTED: Malus x domestica uncharacterized LOC108174430 (LOC108174430), ncRNA}	{NA}	2471.69	1573.62	2033.58	1138.94	133.018	131.3	0.018753	0.98533	1	FALSE	149.359	136.633	0.12848	0.75746	1	FALSE	162.633	143.689	0.17867	0.64054	0.87621	FALSE	70.6671	120.902	-0.77473	0.23129	0.85576	FALSE	78.0386	145.61	-0.89986	0.10089	0.71555	FALSE	76.2931	125.851	-0.72209	0.1167
MD07G1106600_novel01	MD07G1106600	Novel_lncRNA	768	5	{NA}	{NA}	{NA}	{NA}	{NA}	{XR_526726.2; PREDICTED: Malus x domestica uncharacterized LOC103418343 (LOC103418343), transcript variant X2, ncRNA}	{NA}	29.1133	4.64333	4.56333	2.54	1.39693	6.51395	-2.2213	0.11384	0.39643	FALSE	1.30398	1.4378	-0.14094	1	1	FALSE	1.42489	7.10939	-2.3189	0.048276	0.21987	FALSE	0.617126	1.27408	-1.0458	0.84986	1	FALSE	0.675209	1.25743	-0.89707	0.94928	1	FALSE	0.656444	6.24135	-3.2491	0.031414
MD07G1108400_novel02	MD07G1108400	Novel_lncRNA	1853	2	{XP_008385301.1; PREDICTED: leucine carboxyl methyltransferase 1-like [Malus domestica]}	{NA}	{mdm:103447874; K15451 PPM2, LCMT2, TYW4 tRNA wybutosine-synthesizing protein 4 [EC:2.1.1.290 2.3.1.231] 2.1.1.290,2.3.1.231 -}	{NA}	{NA}	{XM_008387079.2; PREDICTED: Malus x domestica leucine carboxyl methyltransferase 1-like (LOC103447874), mRNA}	{NA}	134.647	43.61	78.5667	107.293	47.0514	92.7852	-0.97966	0.11798	0.40533	FALSE	70.6483	48.2665	0.54963	0.40374	1	FALSE	76.9918	101.258	-0.39525	0.40765	0.71034	FALSE	82.5223	42.6998	0.95055	0.17561	0.81931	FALSE	91.4014	68.6497	0.41296	0.48629	0.98512	FALSE	89.6361	88.8099	0.013359	0.92863
MD07G1116700_novel01	MD07G1116700	Novel_lncRNA	367	1	{NA}	{NA}	{NA}	{NA}	{NA}	{XM_008348075.2; PREDICTED: Malus x domestica vesicle-associated protein 1-3-like (LOC103409261), mRNA}	{NA}	1435.3	532.71	561.573	1207.03	46.7699	70.9611	-0.60145	0.2837	0.62926	FALSE	38.2306	48.1222	-0.33197	0.70431	1	FALSE	41.6719	77.4026	-0.89331	0.0724	0.28489	FALSE	70.4655	42.5523	0.72768	0.28825	0.86303	FALSE	77.8912	37.1447	1.0683	0.11172	0.71555	FALSE	76.4423	67.9064	0.17082	0.87437
MD07G1118000_novel03	MD07G1118000	Novel_lncRNA	390	1	{NA}	{NA}	{NA}	{NA}	{NA}	{XM_008374502.2; PREDICTED: Malus x domestica exportin-7-like (LOC103436087), transcript variant X4, mRNA}	{NA}	187.367	39.4833	130.533	98.0867	3.38593	11.3528	-1.7454	0.1999	0.52783	FALSE	10.4988	3.47555	1.5949	0.14229	1	FALSE	11.4502	12.3678	-0.11121	0.95022	1	FALSE	6.68922	3.07799	1.1198	0.39257	0.88922	FALSE	7.34641	10.1859	-0.47146	0.64479	1	FALSE	7.18235	10.8745	-0.59842	0.60435
MD07G1124900_novel01	MD07G1124900	Novel_lncRNA	724	3	{NA}	{NA}	{NA}	{NA}	{NA}	{XM_009352324.2; PREDICTED: Pyrus x bretschneideri syntaxin-81-like (LOC103942114), transcript variant X1, mRNA}	{NA}	403.143	144.94	157.03	228.063	46.977	81.6738	-0.79792	0.19697	0.52444	FALSE	41.9723	48.2004	-0.19961	0.7726	1	FALSE	45.7227	89.3338	-0.9663	0.049599	0.22174	FALSE	51.8904	42.6371	0.28336	0.69222	0.96926	FALSE	57.3427	40.8217	0.49027	0.38884	0.98337	FALSE	56.1063	78.2552	-0.48003	0.30376
MD07G1125100_novel01	MD07G1125100	Novel_lncRNA	1832	2	{XP_006288915.1; hypothetical protein CARUB_v10002278mg [Capsella rubella]}	{sp|P62878|RBX1_MOUSE; E3 ubiquitin-protein ligase RBX1 OS=Mus musculus GN=Rbx1 PE=1 SV=1}	{sot:107059797; K03868 RBX1, ROC1 RING-box protein 1 - ko04141; Genetic Information Processing; Folding, sorting and degradation; Protein processing in endoplasmic reticulum | ko04120; Genetic Information Processing; Folding, sorting and degradation; Ubiquitin mediated proteolysis | ko03420; Genetic Information Processing; Replication and repair; Nucleotide excision repair | ko04310; Environmenta…	{7290070; KOG2930 SCF ubiquitin ligase, Rbx1 component O Posttranslational modification, protein turnover, chaperones ;}	{NA}	{XM_008377673.2; PREDICTED: Malus x domestica RING-box protein 1a (LOC103439121), mRNA}	{NA}	252.373	193.78	215.217	212.833	216.104	172.263	0.32711	0.5554	0.85895	FALSE	192.153	221.87	-0.20746	0.73034	1	FALSE	209.519	188.145	0.15524	0.71747	0.91398	FALSE	160.098	196.231	-0.2936	0.65036	0.95614	FALSE	176.629	186.689	-0.079912	0.88248	1	FALSE	172.735	165.001	0.066085	0.86312
MD07G1131800_novel01	MD07G1131800	Novel_lncRNA	412	1	{NA}	{NA}	{NA}	{NA}	{NA}	{XM_008377747.2; PREDICTED: Malus x domestica FK506-binding protein 4-like (LOC103439204), mRNA}	{NA}	3563.69	8867.27	4613.04	11023.2	1136.44	243.134	2.2247	0.16659	0.48501	FALSE	434.95	1172.56	-1.4307	0.32584	1	FALSE	474.753	265.459	0.83869	0.056215	0.24455	FALSE	887.553	1036.76	-0.22418	0.87965	1	FALSE	986.695	422.252	1.2245	0.029253	0.5962	FALSE	968.982	232.714	2.0579	0.0018328
MD07G1132500_novel09	MD07G1132500	Novel_lncRNA	233	1	{NA}	{NA}	{NA}	{NA}	{NA}	{XM_008348910.2; PREDICTED: Malus x domestica protein REVEILLE 5-like (LOC103410159), mRNA}	{NA}	1150.44	955.13	641.613	983.193	8.26288	6.19047	0.4166	0.72821	0.94544	FALSE	4.85757	8.49707	-0.80673	0.45147	1	FALSE	5.29591	6.75621	-0.35133	0.75714	0.92772	FALSE	6.75836	7.51584	-0.15326	0.88382	1	FALSE	7.56627	4.70539	0.68527	0.62246	1	FALSE	7.44773	5.93057	0.32863	0.88103
MD07G1141500_novel01	MD07G1141500	Novel_lncRNA	315	1	{NA}	{NA}	{NA}	{NA}	{NA}	{XM_008377808.2; PREDICTED: Malus x domestica bifunctional protein FolD 4, chloroplastic (LOC103439266), mRNA}	{NA}	602.963	62.4	84.1467	397.217	2.68746	16.9389	-2.656	0.008537	0.079637	FALSE	3.30077	2.75665	0.25989	0.98886	1	FALSE	3.59637	18.4713	-2.3607	0.0060722	0.051775	FALSE	13.793	2.44095	2.4984	0.01987	0.34606	FALSE	15.203	3.19906	2.2486	0.014756	0.55423	FALSE	14.8781	16.1955	-0.1224	0.86125
MD07G1146600	MD07G1146600	Novel_lncRNA	349	2	{NA}	{NA}	{NA}	{NA}	{NA}	{XR_528460.2; PREDICTED: Malus x domestica uncharacterized LOC103428501 (LOC103428501), ncRNA}	{NA}	15937.8	5126.24	8180.4	14662.7	358.276	677.039	-0.91817	0.10567	0.38475	FALSE	469.191	367.55	0.35224	0.6143	1	FALSE	511.733	739.015	-0.53021	0.16885	0.46462	FALSE	730.071	325.074	1.1673	0.082433	0.69958	FALSE	804.679	454.548	0.82398	0.16639	0.83985	FALSE	788.151	648.416	0.28155	0.61386
MD07G1152400_novel03	MD07G1152400	Novel_lncRNA	265	1	{NA}	{NA}	{NA}	{NA}	{NA}	{XM_017333450.1; PREDICTED: Malus x domestica uncharacterized LOC103439371 (LOC103439371), transcript variant X2, mRNA}	{NA}	1054.87	823.77	1017.61	1335.03	17.1986	13.3283	0.3678	0.69981	0.93316	FALSE	17.4899	17.7084	-0.017913	0.97486	1	FALSE	19.046	14.553	0.38818	0.5861	0.84321	FALSE	20.7372	15.6657	0.40461	0.5344	0.93142	FALSE	22.9606	16.9626	0.43681	0.51793	0.99242	FALSE	22.4595	12.7738	0.81414	0.21054
MD07G1155300_novel02	MD07G1155300	Novel_lncRNA	365	1	{XP_008376183.1; PREDICTED: cytochrome b5-like [Malus domestica]}	{NA}	{NA}	{NA}	{NA}	{XM_008377962.2; PREDICTED: Malus x domestica cytochrome b5-like (LOC103439392), transcript variant X2, mRNA}	{NA}	5406.85	3482.03	6491.07	12408.7	271.563	262.918	0.046673	0.77702	0.9707	FALSE	441.64	277.371	0.67106	0.5834	1	FALSE	483.027	286.961	0.75125	0.36967	0.68128	FALSE	715.11	245.247	1.5439	0.032752	0.43431	FALSE	791.495	427.192	0.8897	0.079881	0.66977	FALSE	776.296	251.665	1.6251	0.0012935
MD07G1177400_novel06	MD07G1177400	Novel_lncRNA	624	1	{NA}	{NA}	{NA}	{NA}	{NA}	{XR_001790518.1; PREDICTED: Malus x domestica E3 SUMO-protein ligase SIZ1-like (LOC103439512), transcript variant X3, misc_RNA}	{NA}	443.223	196.497	265.387	383.167	48.9581	70.4726	-0.52551	0.49176	0.80884	FALSE	55.9839	50.0375	0.162	0.94021	1	FALSE	61.0098	76.9444	-0.33478	0.49303	0.77952	FALSE	68.8361	44.2508	0.63746	0.41105	0.90217	FALSE	76.0117	54.4	0.48261	0.35238	0.97406	FALSE	74.3616	67.456	0.14061	0.78094
MD07G1199300_novel07	MD07G1199300	Novel_lncRNA	247	1	{NA}	{NA}	{NA}	{NA}	{NA}	{XM_008373530.2; PREDICTED: Malus x domestica triosephosphate isomerase, cytosolic-like (LOC103435138), mRNA}	{NA}	4640.46	3580.22	3730.41	6142.64	46.5078	36.4956	0.34975	0.57594	0.87244	FALSE	44.6034	47.7373	-0.097965	0.85554	1	FALSE	48.7117	39.8188	0.29082	0.6216	0.86246	FALSE	62.4286	42.2168	0.56439	0.42883	0.90298	FALSE	68.9519	43.3143	0.67075	0.21686	0.88073	FALSE	67.5777	34.9365	0.95181	0.070556
MD07G1210400_novel01	MD07G1210400	Novel_lncRNA	232	1	{NA}	{NA}	{NA}	{NA}	{NA}	{XM_009352889.2; PREDICTED: Pyrus x bretschneideri 16.9 kDa class I heat shock protein 2-like (LOC103942700), transcript variant X1, mRNA}	{NA}	37222.9	18242.2	7845.13	9401.29	158.234	194.97	-0.30119	0.54247	0.85031	FALSE	57.7144	163.13	-1.499	0.10101	1	FALSE	62.8021	213.279	-1.7639	0.010023	0.074102	FALSE	62.4379	144.287	-1.2084	0.13949	0.79274	FALSE	69.3885	56.1162	0.30628	0.68554	1	FALSE	68.0797	186.993	-1.4577	0.020121
MD07G1219900_novel02	MD07G1219900	Novel_lncRNA	215	1	{NA}	{NA}	{NA}	{NA}	{NA}	{XM_008371018.2; PREDICTED: Malus x domestica clathrin light chain 2-like (LOC103432815), mRNA}	{NA}	1026.32	564.923	439.517	758.903	2.58427	2.60754	-0.012933	1	1	FALSE	1.8096	2.66177	-0.55671	0.83545	1	FALSE	1.97419	2.87224	-0.54092	0.76944	0.93725	FALSE	2.79632	2.35445	0.24814	0.96116	1	FALSE	3.10049	1.75525	0.82082	0.67405	1	FALSE	3.04395	2.50393	0.28175	1
MD07G1219900_novel03	MD07G1219900	Novel_lncRNA	270	1	{NA}	{NA}	{NA}	{NA}	{NA}	{XM_008371018.2; PREDICTED: Malus x domestica clathrin light chain 2-like (LOC103432815), mRNA}	{NA}	2090.8	614.64	635.877	1190.94	13.8319	28.1629	-1.0258	0.16974	0.48501	FALSE	12.2584	14.1894	-0.21104	0.81955	1	FALSE	13.3468	30.7049	-1.202	0.0746	0.28498	FALSE	20.6096	12.5493	0.7157	0.43414	0.90298	FALSE	22.9139	11.9057	0.94457	0.24579	0.9151	FALSE	22.5059	26.943	-0.25961	0.58267
MD07G1228500_novel02	MD07G1228500	Novel_lncRNA	289	1	{XP_008369310.1; PREDICTED: protein EARLY RESPONSIVE TO DEHYDRATION 15-like [Malus domestica]}	{NA}	{mdm:103437701; - - - - -}	{NA}	{NA}	{XM_008371088.2; PREDICTED: Malus x domestica protein EARLY RESPONSIVE TO DEHYDRATION 15-like (LOC103432879), mRNA}	{NA}	7642.04	12293.3	9227.94	7333.81	406.58	153.361	1.4066	0.01199	0.10424	FALSE	262.045	417.335	-0.67139	0.249	1	FALSE	285.905	167.759	0.76915	0.075386	0.28498	FALSE	178.159	369.04	-1.0506	0.10577	0.73696	FALSE	197.49	254.615	-0.36654	0.46827	0.98512	FALSE	193.183	147.093	0.39324	0.36711
MD07G1229100_novel03	MD07G1229100	Novel_lncRNA	218	1	{NA}	{NA}	{NA}	{NA}	{NA}	{XM_008371092.2; PREDICTED: Malus x domestica alpha-soluble NSF attachment protein 2-like (LOC103432882), mRNA}	{NA}	2528.52	2494.65	1902.92	1995.98	12.7374	7.91839	0.68579	0.49897	0.81383	FALSE	8.9021	13.0997	-0.55731	0.62011	1	FALSE	9.69903	8.66482	0.16267	0.85256	0.97203	FALSE	8.24613	11.5816	-0.49004	0.57668	0.94193	FALSE	9.17623	8.66666	0.082426	0.97742	1	FALSE	9.02693	7.59242	0.24968	0.9455
MD07G1229700_novel01	MD07G1229700	Novel_lncRNA	1412	1	{NA}	{NA}	{NA}	{NA}	{NA}	{XR_001953749.1; PREDICTED: Pyrus x bretschneideri uncharacterized LOC103954905 (LOC103954905), transcript variant X2, ncRNA}	{NA}	48.3067	4.68	13.7133	10.8033	3.14309	24.1957	-2.9445	0.0012015	0.019436	TRUE	8.21974	3.23504	1.3453	0.48833	1	FALSE	8.90859	26.4226	-1.5685	0.037673	0.17979	FALSE	5.78431	2.86668	1.0128	0.7297	0.99031	FALSE	6.29082	7.97035	-0.3414	0.85942	1	FALSE	6.1457	23.1746	-1.9149	0.010747
MD07G1241200_novel05	MD07G1241200	Novel_lncRNA	283	1	{XP_009363738.1; PREDICTED: uncharacterized protein LOC103953693 [Pyrus x bretschneideri]}	{NA}	{NA}	{NA}	{NA}	{XM_008358793.2; PREDICTED: Malus x domestica uncharacterized LOC103420757 (LOC103420757), mRNA}	{NA}	995.52	493.04	799.733	997.833	14.2875	17.5415	-0.29601	0.74528	0.95294	FALSE	21.0436	14.6678	0.52073	0.51488	1	FALSE	22.9781	19.1318	0.26429	0.70479	0.91042	FALSE	21.9939	12.975	0.76137	0.36726	0.88797	FALSE	24.4397	20.4665	0.25596	0.77951	1	FALSE	23.9806	16.7914	0.51414	0.48573
MD07G1251300_novel07	MD07G1251300	Novel_lncRNA	2516	1	{NA}	{NA}	{NA}	{NA}	{NA}	{XM_009376191.2; PREDICTED: Pyrus x bretschneideri branchpoint-bridging protein-like (LOC103963381), mRNA}	{NA}	665.57	355.04	515.117	674.183	567.06	650.649	-0.19838	0.66112	0.91144	FALSE	655.554	583.319	0.16843	0.68573	1	FALSE	714.349	710.76	0.0072668	0.9516	1	FALSE	731.63	516.03	0.50366	0.39253	0.88922	FALSE	809.945	637.262	0.34594	0.51544	0.99242	FALSE	792.889	623.196	0.34743	0.48758
MD07G1253400_novel01	MD07G1253400	Novel_lncRNA	870	6	{XP_018499679.1; PREDICTED: uncharacterized protein LOC108866099 [Pyrus x bretschneideri]}	{NA}	{pxb:103944720; - - - - -}	{NA}	{NA}	{XR_530002.2; PREDICTED: Malus x domestica uncharacterized LOC103439633 (LOC103439633), transcript variant X1, ncRNA}	{NA}	388.387	123.143	133.25	196.823	53.3361	102.705	-0.94532	0.11161	0.39404	FALSE	45.9127	54.7719	-0.25455	0.67865	1	FALSE	50.0492	112.162	-1.1642	0.011431	0.081221	FALSE	58.6961	48.4471	0.27686	0.69287	0.96926	FALSE	64.9784	44.5204	0.54549	0.30739	0.9543	FALSE	63.6488	98.3084	-0.62718	0.15308
MD07G1261900_novel02	MD07G1261900	Novel_lncRNA	352	1	{NA}	{NA}	{NA}	{NA}	{NA}	{XM_008369292.2; PREDICTED: Malus x domestica sorbitol dehydrogenase-like (LOC103431148), mRNA}	{NA}	4919.37	16934.1	11907.1	39884.9	1334.68	219.045	2.6072	0.032533	0.20349	FALSE	730.155	1374.36	-0.91248	0.33784	1	FALSE	798.514	238.527	1.7432	0.05605	0.24455	FALSE	2080.91	1215.15	0.77608	0.33736	0.87353	FALSE	2315.64	706.93	1.7118	0.047401	0.63415	FALSE	2277.89	209.783	3.4407	0.0013839
MD07G1279600_novel01	MD07G1279600	Novel_lncRNA	826	1	{NA}	{NA}	{NA}	{NA}	{NA}	{AB270792.1; Malus x domestica MdSFBB9-alpha, S9-RNase, MdSFBB9-beta genes, complete cds, Psi-SFBB9-alpha, Psi-SFBB9-beta pseudogenes}	{NA}	732.517	1050.65	2140.34	1447.19	403.334	180.307	1.1615	0.033513	0.20493	FALSE	681.498	413.403	0.72116	0.26362	1	FALSE	742.789	197.535	1.9108	1.2201e-05	0.00033203	TRUE	405.785	365.717	0.14999	0.91228	1	FALSE	451.425	660.525	-0.54913	0.24102	0.90778	FALSE	442.798	172.866	1.357	0.040424
MD07G1298200_novel03	MD07G1298200	Novel_lncRNA	370	3	{JAU92840.1; hypothetical protein MP_TR4560_c2_g1_i1_g.12044, partial [Noccaea caerulescens]}	{sp|Q9LPI5|CID11_ARATH; Polyadenylate-binding protein-interacting protein 11 OS=Arabidopsis thaliana GN=CID11 PE=2 SV=1}	{mdm:103444304; - - - - -}	{At1g32790; KOG0118 FOG: RRM domain R General function prediction only ;}	{NA}	{XM_008349042.2; PREDICTED: Malus x domestica polyadenylate-binding protein-interacting protein 11-like (LOC103410324), mRNA}	{NA}	1715.52	2532.86	2254.47	4510.63	227.114	87.7256	1.3723	0.045233	0.24599	FALSE	158.765	233.523	-0.55667	0.3565	1	FALSE	173.423	95.6507	0.85845	0.093573	0.32346	FALSE	271.131	206.481	0.39298	0.55877	0.93548	FALSE	300.462	153.832	0.96582	0.06281	0.64311	FALSE	294.969	83.976	1.8125	0.0019513
MD07G1298600	MD07G1298600	Annotated_lncRNA	409	2	{XP_010099430.1; hypothetical protein L484_003254 [Morus notabilis]}	{NA}	{pvu:PHAVU_009G045500g; - - - - -}	{NA}	{NA}	{XR_530050.2; PREDICTED: Malus x domestica uncharacterized LOC103439948 (LOC103439948), ncRNA}	{NA}	4458.4	2085.31	2844.25	1270.23	210.421	303.181	-0.5269	0.51336	0.81804	FALSE	268.319	215.989	0.31299	0.85067	1	FALSE	293.62	330.801	-0.17202	0.68847	0.89578	FALSE	97.5359	191.207	-0.97113	0.38644	0.88797	FALSE	107.002	259.829	-1.2799	0.21396	0.88073	FALSE	104.71	290.39	-1.4716	0.015855
MD07G1299900_novel06	MD07G1299900	Novel_lncRNA	2012	1	{XP_018497820.1; PREDICTED: uncharacterized protein LOC103968063 isoform X2 [Pyrus x bretschneideri]}	{NA}	{NA}	{NA}	{NA}	{AB545981.1; Pyrus pyrifolia genes for F-box proteins, S ribonuclease, complete cds, haplotype: S4}	{NA}	122.697	0.623333	0.676667	2.51667	0.780478	92.6608	-6.8915	1.8595e-07	1.3979e-05	TRUE	0.717612	0.807087	-0.16952	1	1	FALSE	0.789793	100.889	-6.9971	4.9161e-08	2.7338e-06	TRUE	2.04152	0.71438	1.5149	0.63379	0.95614	FALSE	2.22029	0.691249	1.6835	0.58937	1	FALSE	2.16907	88.5768	-5.3518	3.8963e-06
MD08G1004500_novel07	MD08G1004500	Novel_lncRNA	215	1	{NA}	{NA}	{NA}	{NA}	{NA}	{NA}	{NA}	117695	51578.3	61988.5	77496	227.841	333.579	-0.55	0.32067	0.66313	FALSE	249.75	234.156	0.093019	0.86957	1	FALSE	272.079	364.934	-0.42361	0.35494	0.66999	FALSE	284.344	207.185	0.45672	0.43088	0.90298	FALSE	314.855	242.246	0.37822	0.38888	0.98337	FALSE	307.88	319.904	-0.05527	0.95906
MD08G1021800_novel12	MD08G1021800	Novel_lncRNA	1541	3	{NA}	{NA}	{NA}	{NA}	{NA}	{XR_527216.2; PREDICTED: Malus x domestica uncharacterized LOC103421256 (LOC103421256), transcript variant X1, ncRNA}	{NA}	217.293	86.6167	105.363	58.5967	75.271	120.551	-0.67948	0.23077	0.55746	FALSE	75.2791	77.3731	-0.039583	1	1	FALSE	81.9689	131.862	-0.68589	0.13624	0.4081	FALSE	35.8688	68.4656	-0.93265	0.18328	0.83251	FALSE	39.5151	73.1212	-0.88788	0.10472	0.71555	FALSE	38.5755	115.5	-1.5821	0.0012032
MD08G1038900_novel01	MD08G1038900	Novel_lncRNA	218	1	{NA}	{NA}	{NA}	{NA}	{NA}	{XM_008379149.2; PREDICTED: Malus x domestica wall-associated receptor kinase-like 14 (LOC103440458), mRNA}	{NA}	679.967	351.967	219.257	234.333	1.69296	2.58783	-0.61219	0.91193	1	FALSE	0.879553	1.73778	-0.9824	0.72832	1	FALSE	0.952644	2.82543	-1.5685	0.67053	0.89375	FALSE	0.961017	1.539	-0.67935	0.86555	1	FALSE	1.07033	0.84927	0.33376	1	1	FALSE	1.04638	2.48628	-1.2486	0.74018
MD08G1049600_novel01	MD08G1049600	Novel_lncRNA	239	1	{NA}	{NA}	{NA}	{NA}	{NA}	{AF052585.1; Malus domestica cultivar Fuji CONSTANS-like protein 2 (Col2) mRNA, complete cds}	{NA}	2678.71	2095.11	2466.54	1488.35	21.5803	17.162	0.33049	0.67502	0.91956	FALSE	23.6267	22.1767	0.091375	0.89921	1	FALSE	25.7847	18.761	0.45878	0.48563	0.77952	FALSE	12.1551	19.6188	-0.69068	0.39106	0.88922	FALSE	13.4176	22.9743	-0.77589	0.26726	0.93234	FALSE	13.1371	16.4503	-0.32447	0.65755
MD08G1060200_novel01	MD08G1060200	Novel_lncRNA	254	1	{NA}	{NA}	{NA}	{NA}	{NA}	{XM_008379451.1; PREDICTED: Malus x domestica 60S ribosomal protein L39-1 (LOC103440752), mRNA}	{NA}	3164.33	1325.38	2265.03	2455.9	20.7165	29.1762	-0.49401	0.45484	0.78658	FALSE	30.6544	21.3075	0.52473	0.40044	1	FALSE	33.3536	31.8302	0.067447	0.8709	0.98004	FALSE	29.7637	18.8539	0.65869	0.37233	0.88797	FALSE	32.936	29.8098	0.14388	0.94021	1	FALSE	32.2856	27.9127	0.20997	0.80443
MD08G1068600_novel01	MD08G1068600	Novel_lncRNA	1791	4	{XP_008341355.1; PREDICTED: uncharacterized protein LOC103404238, partial [Malus domestica]}	{sp|Q8VYF9|SRGT1_ARATH; Peptidyl serine alpha-galactosyltransferase OS=Arabidopsis thaliana GN=SERGT1 PE=2 SV=1}	{nnu:104592984; K20781 SGT1 peptidyl serine alpha-galactosyltransferase 2.4.1.- ko00514; Metabolism; Glycan biosynthesis and metabolism; Other types of O-glycan biosynthesis}	{NA}	{NA}	{XR_530155.2; PREDICTED: Malus x domestica uncharacterized LOC103440889 (LOC103440889), ncRNA}	{NA}	172.26	81.8833	111.273	127.453	88.2397	114.349	-0.37394	0.59636	0.87704	FALSE	95.489	90.3193	0.0803	0.97463	1	FALSE	104.011	124.984	-0.26501	0.58076	0.83931	FALSE	93.8092	79.859	0.23227	0.81202	1	FALSE	103.696	92.7772	0.16052	0.79582	1	FALSE	101.529	109.544	-0.10962	0.77513
MD08G1083100_novel01	MD08G1083100	Novel_lncRNA	560	3	{NA}	{NA}	{NA}	{NA}	{NA}	{XR_530454.2; PREDICTED: Malus x domestica uncharacterized LOC103443108 (LOC103443108), transcript variant X2, ncRNA}	{NA}	34.8533	3.21667	8.97333	3.71667	0.862492	4.54332	-2.3972	0.11073	0.39309	FALSE	1.42555	0.895275	0.67111	0.76596	1	FALSE	1.54484	4.95169	-1.6805	0.21345	0.52357	FALSE	0.553745	0.79172	-0.51577	1	1	FALSE	0.610321	1.38127	-1.1784	0.80255	1	FALSE	0.589864	4.34267	-2.8801	0.1034
MD08G1094000_novel01	MD08G1094000	Novel_lncRNA	1567	2	{NA}	{NA}	{NA}	{NA}	{NA}	{XR_001789209.1; PREDICTED: Malus x domestica uncharacterized LOC108172658 (LOC108172658), transcript variant X2, ncRNA}	{NA}	111.567	25.57	45.2033	73.5367	21.9187	63.4476	-1.5334	0.021187	0.15385	FALSE	33.0014	22.4901	0.55324	0.514	1	FALSE	36.0075	69.3067	-0.9447	0.048479	0.21987	FALSE	46.101	19.902	1.2119	0.092158	0.71163	FALSE	50.8751	31.9433	0.67144	0.20712	0.88073	FALSE	49.7994	60.785	-0.28759	0.55199
MD08G1094000_novel02	MD08G1094000	Novel_lncRNA	541	1	{XP_017183787.1; PREDICTED: protein ROOT INITIATION DEFECTIVE 3-like [Malus domestica]}	{NA}	{pxb:103950287; K14829 IPI3 pre-rRNA-processing protein IPI3 - -}	{At3g49180; KOG0646 WD40 repeat protein R General function prediction only ;}	{GO:0005515; protein binding; molecular_function}	{XR_001789209.1; PREDICTED: Malus x domestica uncharacterized LOC108172658 (LOC108172658), transcript variant X2, ncRNA}	{PF00400:WD domain, G-beta repeat}	198.63	85.4567	144.8	66.6067	15.4839	24.78	-0.6784	0.40691	0.7429	FALSE	23.7281	15.8784	0.57952	0.48576	1	FALSE	25.8527	27.0916	-0.067534	0.9574	1	FALSE	9.24445	14.0561	-0.60454	0.60206	0.94982	FALSE	10.1577	23.0531	-1.1824	0.1293	0.7535	FALSE	9.90332	23.7516	-1.262	0.090681
MD08G1103600_novel01	MD08G1103600	Novel_lncRNA	491	1	{NA}	{NA}	{NA}	{NA}	{NA}	{NA}	{NA}	340.497	240.397	271.027	500.83	41.9385	35.0203	0.26008	0.73881	0.94894	FALSE	37.1625	43.1381	-0.21512	0.78204	1	FALSE	40.5482	38.2264	0.085068	0.92719	1	FALSE	58.7122	38.1535	0.62184	0.31726	0.86303	FALSE	64.9739	36.0452	0.85005	0.10769	0.71555	FALSE	63.6206	33.5382	0.92369	0.071201
MD08G1112300_novel01	MD08G1112300	Novel_lncRNA	1075	3	{NA}	{NA}	{NA}	{NA}	{NA}	{XR_001791272.1; PREDICTED: Malus x domestica uncharacterized LOC108174430 (LOC108174430), ncRNA}	{NA}	174.597	95.2933	137.913	132.747	54.2998	61.7439	-0.18535	0.80808	0.98168	FALSE	64.4405	55.712	0.20998	0.76271	1	FALSE	70.2631	67.2976	0.062214	0.88725	0.9893	FALSE	52.6167	49.2777	0.094585	0.93877	1	FALSE	58.2571	62.6268	-0.10435	0.80558	1	FALSE	57.066	59.0702	-0.049797	0.9
MD08G1115200_novel01	MD08G1115200	Novel_lncRNA	2459	1	{XP_018500636.1; PREDICTED: uncharacterized protein LOC103937845 [Pyrus x bretschneideri]}	{NA}	{NA}	{NA}	{NA}	{XM_018645120.1; PREDICTED: Pyrus x bretschneideri uncharacterized LOC103937845 (LOC103937845), mRNA}	{NA}	8.08	1.26	3.82667	2.53	1.96462	7.75502	-1.9809	0.13697	0.44316	FALSE	4.51433	2.007	1.1695	0.42323	1	FALSE	4.90072	8.46449	-0.78843	0.49432	0.77952	FALSE	2.66592	1.77404	0.58759	0.84411	1	FALSE	2.94564	4.3869	-0.57462	0.66308	1	FALSE	2.88237	7.43086	-1.3663	0.2143
MD08G1124400_novel49	MD08G1124400	Novel_lncRNA	1819	1	{XP_008378137.1; PREDICTED: AIG2-like protein [Malus domestica]}	{NA}	{pmum:103320125; - - - - -}	{NA}	{NA}	{XM_008379915.2; PREDICTED: Malus x domestica AIG2-like protein (LOC103441213), mRNA}	{NA}	287.343	86.63	155.083	168.903	92.3886	194.034	-1.0705	0.068737	0.3116	FALSE	137.965	94.7886	0.54152	0.38771	1	FALSE	150.449	212.006	-0.49483	0.26169	0.57425	FALSE	127.164	83.8515	0.60078	0.34494	0.87353	FALSE	140.849	134.102	0.070823	0.87278	1	FALSE	137.791	185.836	-0.43154	0.34011
MD08G1132800_novel02	MD08G1132800	Novel_lncRNA	1104	1	{ACS74199.1; putative gag-pol polyprotein [Fragaria x ananassa]}	{NA}	{pper:PRUPE_ppa018352mg; - - - - -}	{At2g19840; KOG0017 FOG: Transposon-encoded proteins with TYA, reverse transcriptase, integrase domains in various combinations R General function prediction only ;}	{NA}	{XR_001789407.1; PREDICTED: Malus x domestica uncharacterized LOC103430294 (LOC103430294), ncRNA}	{NA}	235.923	227.547	249.39	183.83	138.774	86.6231	0.67992	0.22963	0.55686	FALSE	120.148	142.381	-0.24495	0.6928	1	FALSE	130.938	94.5722	0.46939	0.27883	0.5924	FALSE	74.8954	125.906	-0.7494	0.26696	0.85852	FALSE	82.6731	116.813	-0.49872	0.3523	0.97406	FALSE	80.6894	82.9503	-0.039868	0.95761
MD08G1143000_novel01	MD08G1143000	Novel_lncRNA	306	1	{NA}	{NA}	{NA}	{NA}	{NA}	{XM_008393915.2; PREDICTED: Malus x domestica cytochrome b-c1 complex subunit 7-2-like (LOC103454314), mRNA}	{NA}	16482.5	11135.5	15172.9	15088.6	473.417	420.096	0.17239	0.74565	0.95294	FALSE	541.227	485.994	0.15529	0.79809	1	FALSE	589.938	458.892	0.36241	0.38545	0.69582	FALSE	468.615	429.847	0.12458	0.89957	1	FALSE	517.882	525.425	-0.020864	0.89671	1	FALSE	507.574	402.353	0.33516	0.54355
MD08G1144700_novel01	MD08G1144700	Novel_lncRNA	2956	6	{XP_008389812.1; PREDICTED: uncharacterized protein LOC103452104 [Malus domestica]}	{NA}	{mdm:103452104; - - - - -}	{NA}	{NA}	{XR_527216.2; PREDICTED: Malus x domestica uncharacterized LOC103421256 (LOC103421256), transcript variant X1, ncRNA}	{NA}	163.33	99.5667	107.763	57.0467	184.056	190.262	-0.047841	0.93187	1	FALSE	163.733	189.056	-0.20747	0.75963	1	FALSE	178.402	207.735	-0.21961	0.64774	0.8776	FALSE	73.5332	167.259	-1.1856	0.086358	0.71163	FALSE	81.2365	159.203	-0.97067	0.064426	0.64311	FALSE	79.1682	182.143	-1.2021	0.014477
MD08G1144700_novel02	MD08G1144700	Novel_lncRNA	2101	7	{XP_008389812.1; PREDICTED: uncharacterized protein LOC103452104 [Malus domestica]}	{NA}	{mdm:103452104; - - - - -}	{NA}	{NA}	{XR_001790209.1; PREDICTED: Malus x domestica uncharacterized LOC103437124 (LOC103437124), transcript variant X5, ncRNA}	{NA}	27.1233	26.9467	22.52	24.65	37.2063	21.6427	0.78167	0.30806	0.65182	FALSE	23.3036	38.3364	-0.71816	0.38741	1	FALSE	25.3804	23.6754	0.10033	0.86698	0.97822	FALSE	21.9357	33.9087	-0.62837	0.43652	0.90298	FALSE	24.295	22.6449	0.10148	0.95267	1	FALSE	23.8005	20.7483	0.19799	0.80663
MD08G1144700_novel03	MD08G1144700	Novel_lncRNA	3260	5	{XP_008389812.1; PREDICTED: uncharacterized protein LOC103452104 [Malus domestica]}	{NA}	{mdm:103452104; - - - - -}	{NA}	{NA}	{XR_527216.2; PREDICTED: Malus x domestica uncharacterized LOC103421256 (LOC103421256), transcript variant X1, ncRNA}	{NA}	67.9	54.67	70.8833	61.8833	118.978	88.1034	0.43342	0.50033	0.81383	FALSE	119.538	122.307	-0.033049	0.95351	1	FALSE	130.46	96.2795	0.43831	0.40018	0.70648	FALSE	88.1941	108.168	-0.29452	0.80184	1	FALSE	97.2661	115.837	-0.25208	0.8398	1	FALSE	94.7611	84.385	0.16731	0.57117
MD08G1144700_novel05	MD08G1144700	Novel_lncRNA	1782	1	{NA}	{NA}	{pxb:103944205; - - - - -}	{NA}	{NA}	{XR_001951984.1; PREDICTED: Pyrus x bretschneideri uncharacterized LOC108866180 (LOC108866180), ncRNA}	{NA}	0	10.5233	0	17.7467	11.2494	0	Inf	0.16184	0.47768	FALSE	0	11.3992	#NAME?	0.16141	1	FALSE	0	0	NA	NA	NA	NA	13.8473	10.0668	0.45999	0.98163	1	FALSE	15.6403	0	Inf	0.17493	0.85486	FALSE	15.5216	0	Inf	0.17269
MD08G1165000_novel01	MD08G1165000	Novel_lncRNA	2830	1	{XP_017178436.1; PREDICTED: rho GTPase-activating protein gacV-like [Malus domestica]}	{NA}	{mdm:103450641; - - - - -}	{NA}	{NA}	{XM_017336017.1; PREDICTED: Malus x domestica DNA-directed RNA polymerase III subunit rpc31 (LOC103450641), transcript variant X3, mRNA}	{NA}	202.51	131.05	167.743	150.62	237.953	225.757	0.075905	0.87202	0.99464	FALSE	238.421	244.189	-0.03449	0.9218	1	FALSE	259.78	246.612	0.075049	0.88606	0.9893	FALSE	184.193	215.963	-0.22957	0.72407	0.98871	FALSE	203.011	231.182	-0.18747	0.74386	1	FALSE	198.43	216.262	-0.12414	0.82539
MD08G1171700	MD08G1171700	Novel_lncRNA	785	2	{NA}	{NA}	{NA}	{NA}	{NA}	{XR_001786885.1; PREDICTED: Malus x domestica uncharacterized LOC108170503 (LOC108170503), transcript variant X1, ncRNA}	{NA}	6006.92	6147.62	7668.79	5749.35	2339.06	1376.48	0.76495	0.17154	0.48501	FALSE	2288.13	2402.66	-0.070468	0.92926	1	FALSE	2492.93	1503.36	0.72965	0.072723	0.28489	FALSE	1478.04	2124.99	-0.52377	0.47334	0.91281	FALSE	1634.65	2221.79	-0.44275	0.44248	0.98512	FALSE	1596.93	1318.23	0.2767	0.53221
MD08G1176600_novel01	MD08G1176600	Novel_lncRNA	905	2	{XP_008338184.1; PREDICTED: 60S ribosomal protein L30-like [Malus domestica]}	{sp|Q9LSA3|RL303_ARATH; 60S ribosomal protein L30-3 OS=Arabidopsis thaliana GN=RPL30C PE=3 SV=1}	{pmum:103323342; K02908 RP-L30e, RPL30 large subunit ribosomal protein L30e - ko03010; Genetic Information Processing; Translation; Ribosome}	{At3g18740; KOG2988 60S ribosomal protein L30 J Translation, ribosomal structure and biogenesis ;}	{NA}	{XM_008359318.1; PREDICTED: Malus x domestica 60S ribosomal protein L30 (LOC103421291), mRNA}	{NA}	2444.52	1226.62	1892.02	1631.72	530.362	683.591	-0.36616	0.54951	0.85571	FALSE	687.193	543.848	0.33751	0.61252	1	FALSE	748.654	746.011	0.0051011	0.99704	1	FALSE	510.279	481.177	0.08472	0.98303	1	FALSE	563.188	666.908	-0.24387	0.57602	1	FALSE	551.614	654.173	-0.24601	0.55519
MD08G1204100_novel01	MD08G1204100	Novel_lncRNA	1901	2	{XP_008360210.1; PREDICTED: F-box/kelch-repeat protein At1g16250-like [Malus domestica]}	{sp|Q0WW40|FBK5_ARATH; F-box/kelch-repeat protein At1g16250 OS=Arabidopsis thaliana GN=At1g16250 PE=2 SV=1}	{pxb:103944720; - - - - -}	{At1g16250; KOG1072 FOG: Kelch repeat R General function prediction only ;}	{NA}	{XR_530286.2; PREDICTED: Malus x domestica uncharacterized LOC103441688 (LOC103441688), ncRNA}	{NA}	117.033	38.0467	49.1233	50.4433	43.6462	83.0251	-0.92769	0.12551	0.42324	FALSE	45.6163	44.8345	0.024941	0.95302	1	FALSE	49.7142	90.6568	-0.86676	0.073589	0.28498	FALSE	39.8066	39.6602	0.0053137	0.99415	1	FALSE	44.0183	44.3392	-0.010479	0.92906	1	FALSE	43.1302	79.4814	-0.88192	0.057334
MD08G1206900_novel04	MD08G1206900	Novel_lncRNA	431	2	{XP_008352723.1; PREDICTED: CBL-interacting serine/threonine-protein kinase 8-like isoform X2 [Malus domestica]}	{NA}	{pmum:103319425; K07198 PRKAA, AMPK 5'-AMP-activated protein kinase, catalytic alpha subunit 2.7.11.11 ko04371; Environmental Information Processing; Signal transduction; Apelin signaling pathway | ko04068; Environmental Information Processing; Signal transduction; FoxO signaling pathway | ko04151; Environmental Information Processing; Signal transduction; PI3K-Akt signaling pathway | ko04152; En…	{At4g24400; KOG0583 Serine/threonine protein kinase T Signal transduction mechanisms ;}	{NA}	{XM_017328371.1; PREDICTED: Malus x domestica CBL-interacting serine/threonine-protein kinase 8-like (LOC103421317), transcript variant X2, mRNA}	{NA}	1160.92	1041.35	1692.76	1380.51	128.388	89.2835	0.52405	0.32149	0.66368	FALSE	175.577	131.578	0.41619	0.54101	1	FALSE	191.434	97.502	0.97334	0.029546	0.15263	FALSE	123.182	116.38	0.081951	0.98188	1	FALSE	136.659	170.549	-0.31961	0.46342	0.98512	FALSE	133.917	85.5079	0.64721	0.16882
MD08G1208000_novel02	MD08G1208000	Novel_lncRNA	2002	1	{XP_009348113.1; PREDICTED: phosphoglycerate mutase-like protein 1 isoform X2 [Pyrus x bretschneideri]}	{NA}	{pmum:103319422; - - - - -}	{NA}	{NA}	{XM_007223491.1; Prunus persica hypothetical protein (PRUPE_ppa014527mg) mRNA, complete cds}	{NA}	16.3367	5.34667	8.74	29.3	6.13226	12.3594	-1.0111	0.36174	0.69941	FALSE	8.27069	6.26354	0.40103	0.77671	1	FALSE	8.96874	13.4735	-0.58714	0.58583	0.84321	FALSE	24.4173	5.53957	2.1401	0.018682	0.34606	FALSE	26.9445	8.04837	1.7432	0.034093	0.5962	FALSE	26.4072	11.8298	1.1585	0.090984
MD08G1210600_novel02	MD08G1210600	Novel_lncRNA	261	1	{NA}	{NA}	{NA}	{NA}	{NA}	{XM_008349614.2; PREDICTED: Malus x domestica tubulin alpha chain (LOC103410967), mRNA}	{NA}	44055.3	9948.87	12176.8	18683.2	179.246	486.764	-1.4413	0.011125	0.098737	FALSE	199.418	183.993	0.11614	0.81259	1	FALSE	217.145	532.107	-1.2931	0.0032314	0.031075	TRUE	264.655	162.808	0.70094	0.31425	0.86303	FALSE	291.359	194.192	0.58531	0.39594	0.98512	FALSE	285.148	466.203	-0.70925	0.11188
MD08G1217000	MD08G1217000	Novel_lncRNA	734	3	{XP_008343347.1; PREDICTED: uncharacterized protein LOC103406108 [Malus domestica]}	{NA}	{NA}	{NA}	{NA}	{XR_530302.2; PREDICTED: Malus x domestica uncharacterized LOC103441809 (LOC103441809), ncRNA}	{NA}	13406.1	12364.4	19468.9	22942.1	4148.09	2784.96	0.57479	0.27678	0.61949	FALSE	5304.82	4253.11	0.31879	0.63827	1	FALSE	5785.32	3040.45	0.92811	0.031762	0.16057	FALSE	5329.42	3761.5	0.50267	0.50384	0.91778	FALSE	5889.92	5147.85	0.19428	0.74618	1	FALSE	5768.83	2667.34	1.1129	0.064252
MD08G1217000_novel02	MD08G1217000	Novel_lncRNA	375	2	{NA}	{NA}	{NA}	{NA}	{NA}	{XR_530302.2; PREDICTED: Malus x domestica uncharacterized LOC103441809 (LOC103441809), ncRNA}	{NA}	84.94	106.017	170.017	89.41	8.77221	4.44272	0.9815	0.43475	0.76424	FALSE	12.4965	8.9326	0.48437	0.7101	1	FALSE	13.6042	4.87609	1.4803	0.088828	0.31255	FALSE	5.73912	7.89395	-0.45992	0.58297	0.94193	FALSE	6.35129	12.1701	-0.93822	0.26309	0.92214	FALSE	6.22125	4.26139	0.54588	0.67979
MD08G1229300_novel01	MD08G1229300	Novel_lncRNA	2370	1	{KRH44038.1; hypothetical protein GLYMA_08G186200 [Glycine max]}	{NA}	{NA}	{NA}	{NA}	{XM_017333873.1; PREDICTED: Malus x domestica uncharacterized protein At1g10890-like (LOC103441924), transcript variant X5, mRNA}	{NA}	320.003	192.84	261.38	157.1	266.144	291.634	-0.13195	0.88741	0.99621	FALSE	312.481	272.778	0.19604	0.79583	1	FALSE	340.558	318.554	0.096364	0.80198	0.94611	FALSE	158.114	241.358	-0.6102	0.33103	0.87353	FALSE	174.196	303.837	-0.80258	0.10961	0.71555	FALSE	169.999	279.219	-0.71587	0.14051
MD08G1229300_novel02	MD08G1229300	Novel_lncRNA	1761	2	{KRH44038.1; hypothetical protein GLYMA_08G186200 [Glycine max]}	{NA}	{NA}	{NA}	{NA}	{XM_017333873.1; PREDICTED: Malus x domestica uncharacterized protein At1g10890-like (LOC103441924), transcript variant X5, mRNA}	{NA}	797.23	864.13	928.8	663.417	931.112	518.178	0.84551	0.11745	0.4046	FALSE	798.637	955.495	-0.25871	0.65978	1	FALSE	870.813	566.041	0.62146	0.12029	0.38271	FALSE	480.037	844.963	-0.81574	0.22097	0.84967	FALSE	531.388	776.814	-0.5478	0.292	0.95378	FALSE	519.276	496.218	0.065526	0.82931
MD08G1232700_novel01	MD08G1232700	Novel_lncRNA	2278	2	{NA}	{NA}	{NA}	{NA}	{NA}	{XR_668569.2; PREDICTED: Pyrus x bretschneideri uncharacterized LOC103956701 (LOC103956701), ncRNA}	{NA}	130.72	76.2933	89.5167	88.2333	107.392	114.161	-0.088179	0.83235	0.98598	FALSE	100.111	110.448	-0.14177	0.84945	1	FALSE	109.084	124.772	-0.19385	0.6357	0.87394	FALSE	85.0296	97.7159	-0.20063	0.89364	1	FALSE	93.8079	97.0737	-0.049371	0.92795	1	FALSE	91.4781	109.349	-0.25744	0.70044
MD08G1240300_novel03	MD08G1240300	Novel_lncRNA	367	1	{XP_008365314.1; PREDICTED: probable magnesium transporter NIPA4 [Malus domestica]}	{NA}	{pxb:103946342; - - - - -}	{NA}	{NA}	{XM_008367092.2; PREDICTED: Malus x domestica probable magnesium transporter NIPA4 (LOC103428956), mRNA}	{NA}	1093.45	390.82	448.543	735.35	31.5053	54.6893	-0.79566	0.22433	0.55134	FALSE	30.314	32.3327	-0.093008	0.87636	1	FALSE	33.0457	59.784	-0.8553	0.098605	0.33721	FALSE	42.9316	28.6024	0.58591	0.40309	0.89416	FALSE	47.4355	29.424	0.68897	0.2229	0.89253	FALSE	46.4128	52.4111	-0.17535	0.74177
MD08G1244000_novel01	MD08G1244000	Novel_lncRNA	1441	3	{XP_018502785.1; PREDICTED: uncharacterized protein LOC103946376 [Pyrus x bretschneideri]}	{NA}	{pxb:103946376; - - - - -}	{NA}	{GO:0005249; voltage-gated potassium channel activity; molecular_function GO:0006811; ion transport; biological_process GO:0030176; integral to endoplasmic reticulum membrane; cellular_component GO:0050790; regulation of catalytic activity; biological_process GO:0016020; membrane; cellular_component GO:2001256; NA GO:0030234; NA}	{XM_017333586.1; PREDICTED: Malus x domestica uncharacterized LOC103441971 (LOC103441971), mRNA}	{PF06682:SOCE-associated regulatory factor of calcium homoeostasis PF02060:Slow voltage-gated potassium channel PF08114:ATPase proteolipid family}	932.38	366.413	392.283	506.763	307.793	477.838	-0.63456	0.2451	0.58007	FALSE	258.93	316.153	-0.28806	0.6275	1	FALSE	282.166	521.742	-0.88679	0.032989	0.16473	FALSE	288.53	279.635	0.045176	0.95715	1	FALSE	319.029	251.203	0.34483	0.49115	0.98512	FALSE	312.462	457.559	-0.55028	0.2161
MD08G1244000_novel02	MD08G1244000	Novel_lncRNA	1504	2	{NA}	{NA}	{NA}	{NA}	{GO:0006811; ion transport; biological_process GO:0050790; regulation of catalytic activity; biological_process GO:0030176; integral to endoplasmic reticulum membrane; cellular_component GO:0016020; membrane; cellular_component GO:2001256; NA GO:0030234; NA GO:0005249; voltage-gated potassium channel activity; molecular_function}	{XM_017333586.1; PREDICTED: Malus x domestica uncharacterized LOC103441971 (LOC103441971), mRNA}	{PF08114:ATPase proteolipid family PF02060:Slow voltage-gated potassium channel PF06682:SOCE-associated regulatory factor of calcium homoeostasis}	42.6133	12.4833	12.7767	12.8533	10.6831	23.128	-1.1143	0.14788	0.45348	FALSE	8.89153	10.9825	-0.3047	0.78523	1	FALSE	9.68178	25.2596	-1.3835	0.057332	0.2473	FALSE	7.96926	9.71562	-0.28586	0.71879	0.98532	FALSE	8.87107	8.62283	0.040948	0.95953	1	FALSE	8.732	22.163	-1.3438	0.042319
MD08G1244600_novel05	MD08G1244600	Novel_lncRNA	348	1	{NA}	{NA}	{NA}	{NA}	{NA}	{XM_008367103.2; PREDICTED: Malus x domestica leucine--tRNA ligase, cytoplasmic-like (LOC103428967), mRNA}	{NA}	2858.76	2089.92	2268.45	3051.48	155.714	119.103	0.38669	0.6423	0.90304	FALSE	128.92	160.471	-0.31583	0.74261	1	FALSE	140.465	129.979	0.11193	0.80864	0.94973	FALSE	152.542	141.92	0.10413	0.77452	1	FALSE	169.16	125.133	0.43492	0.39493	0.98512	FALSE	165.774	114.005	0.54013	0.25508
MD08G1249900_novel01	MD08G1249900	Novel_lncRNA	262	1	{NA}	{NA}	{NA}	{NA}	{NA}	{XM_008380743.2; PREDICTED: Malus x domestica PHD finger protein ALFIN-LIKE 7 (LOC103442007), mRNA}	{NA}	6075.89	2116.77	3059.37	4293.12	40.6428	69.4743	-0.77348	0.21111	0.5374	FALSE	50.7661	41.745	0.28226	0.65894	1	FALSE	55.3452	75.763	-0.45304	0.35153	0.66999	FALSE	62.4665	36.9184	0.75874	0.26291	0.85852	FALSE	69.0978	49.2851	0.48749	0.38737	0.98337	FALSE	67.7201	66.493	0.02638	0.99689
MD09G1005100	MD09G1005100	Novel_lncRNA	585	3	{XP_008379064.1; PREDICTED: cysteine-rich and transmembrane domain-containing protein A [Malus domestica]}	{NA}	{NA}	{NA}	{NA}	{XM_008349767.2; PREDICTED: Malus x domestica cysteine-rich and transmembrane domain-containing protein A-like (LOC103411110), mRNA}	{NA}	6287.47	10641	7679.72	5092.02	2580.55	901.419	1.5174	0.0075951	0.074096	FALSE	1489.03	2652.35	-0.8329	0.17817	1	FALSE	1623.49	984.976	0.72094	0.088951	0.31255	FALSE	827.817	2345.66	-1.5026	0.029085	0.43025	FALSE	917.405	1450.12	-0.66054	0.20004	0.87214	FALSE	896.898	863.639	0.054517	0.85756
MD09G1011000_novel03	MD09G1011000	Novel_lncRNA	1340	1	{NA}	{NA}	{NA}	{NA}	{NA}	{XM_008367133.1; PREDICTED: Malus x domestica B2 protein-like (LOC103428991), transcript variant X2, mRNA}	{NA}	5.20333	0	2.79	2.81667	0	2.41442	#NAME?	0.095657	0.36062	FALSE	1.63799	0	Inf	0.15709	1	FALSE	1.77659	2.63329	-0.56775	0.83859	0.96714	FALSE	1.44774	0	Inf	0.20006	0.83251	FALSE	1.59069	1.596	-0.0048096	1	1	FALSE	1.54124	2.3084	-0.5828	0.92371
MD09G1016800_novel04	MD09G1016800	Novel_lncRNA	213	1	{NA}	{NA}	{NA}	{NA}	{NA}	{XR_525486.2; PREDICTED: Malus x domestica prohibitin-3, mitochondrial-like (LOC103411134), transcript variant X2, misc_RNA}	{NA}	3381.28	2322.61	2355.45	2571.36	9.20098	8.19881	0.16637	0.86674	0.99321	FALSE	8.94202	9.43242	-0.077027	0.92456	1	FALSE	9.75068	8.94008	0.12521	0.94919	1	FALSE	8.74529	8.34349	0.067856	1	1	FALSE	9.66699	8.67954	0.15545	0.90753	1	FALSE	9.46513	7.84058	0.27166	0.81267
MD09G1042700_novel01	MD09G1042700	Novel_lncRNA	1837	2	{NA}	{NA}	{NA}	{NA}	{NA}	{XM_017324342.1; PREDICTED: Malus x domestica putative rRNA methyltransferase YlbH (LOC103404593), transcript variant X4, mRNA}	{NA}	124.137	33.17	49.6067	53.1	36.135	84.8094	-1.2308	0.045566	0.24675	FALSE	43.0477	37.1157	0.2139	0.74664	1	FALSE	46.8638	92.6826	-0.98383	0.040622	0.19102	FALSE	39.9473	32.835	0.28286	0.69254	0.96926	FALSE	44.0137	41.76	0.07583	0.92484	1	FALSE	43.0647	81.2345	-0.91559	0.055207
MD09G1054900_novel02	MD09G1054900	Novel_lncRNA	388	1	{XP_009360595.1; PREDICTED: pectinesterase 31 [Pyrus x bretschneideri]}	{sp|Q9LVQ0|PME31_ARATH; Pectinesterase 31 OS=Arabidopsis thaliana GN=PME31 PE=1 SV=1}	{lang:109361231; K01051 E3.1.1.11 pectinesterase 3.1.1.11 ko00040; Metabolism; Carbohydrate metabolism; Pentose and glucuronate interconversions; lang:109361231; - - - - -}	{NA}	{NA}	{XM_008359546.2; PREDICTED: Malus x domestica pectinesterase 31 (LOC103421503), mRNA}	{NA}	1490.98	1788.56	2338.57	1627.35	170.481	87.3262	0.96512	0.08702	0.34753	FALSE	185.297	174.923	0.083123	0.86138	1	FALSE	201.729	95.3836	1.0806	0.011815	0.082426	FALSE	110.022	154.727	-0.49194	0.44066	0.90298	FALSE	121.083	180.333	-0.57467	0.2196	0.88465	FALSE	118.276	83.6379	0.49993	0.23638
MD09G1069500_novel01	MD09G1069500	Novel_lncRNA	1153	3	{NA}	{NA}	{NA}	{NA}	{NA}	{XM_017325788.1; PREDICTED: Malus x domestica receptor-like protein kinase FERONIA (LOC103411222), transcript variant X2, mRNA}	{NA}	902.893	559.823	863.847	552.713	336.076	350.229	-0.059511	0.95921	1	FALSE	438.476	344.8	0.34674	0.57049	1	FALSE	477.795	382.619	0.32048	0.42093	0.72156	FALSE	237.725	305.068	-0.35983	0.60743	0.95031	FALSE	262.259	426.207	-0.70056	0.17787	0.85486	FALSE	255.892	335.429	-0.39047	0.4806
MD09G1069700_novel01	MD09G1069700	Novel_lncRNA	1360	1	{XP_019174054.1; PREDICTED: uncharacterized protein LOC109169631 isoform X1 [Ipomoea nil]}	{NA}	{gra:105787917; - - - - -}	{NA}	{NA}	{XM_008381406.2; PREDICTED: Malus x domestica uncharacterized LOC103442599 (LOC103442599), mRNA}	{NA}	749.61	247.557	314.97	465.977	196.86	356.949	-0.85855	0.10724	0.38824	FALSE	194.429	202.509	-0.058738	0.97865	1	FALSE	211.921	389.426	-0.87782	0.037331	0.17883	FALSE	246.461	179.127	0.46038	0.45531	0.90363	FALSE	272.048	188.63	0.5283	0.29297	0.95378	FALSE	266.545	341.594	-0.3579	0.38024
MD09G1071500_novel02	MD09G1071500	Novel_lncRNA	267	1	{XP_009347134.1; PREDICTED: uncharacterized protein LOC103938815 [Pyrus x bretschneideri]}	{NA}	{fve:101297771; - - - - -}	{NA}	{NA}	{XM_009348859.2; PREDICTED: Pyrus x bretschneideri uncharacterized LOC103938815 (LOC103938815), mRNA}	{NA}	8277.71	7172.79	8564.75	6894.63	146.597	108.067	0.43994	0.3828	0.72383	FALSE	157.98	150.229	0.07258	0.95874	1	FALSE	172.093	118.188	0.5421	0.20029	0.50942	FALSE	111.521	132.902	-0.25305	0.61443	0.95387	FALSE	123.321	153.565	-0.31643	0.4606	0.98512	FALSE	120.744	103.611	0.22078	0.64473
MD09G1080900_novel01	MD09G1080900	Novel_lncRNA	248	1	{NA}	{NA}	{NA}	{NA}	{NA}	{XM_008381269.2; PREDICTED: Malus x domestica protein FLX-like 2 (LOC103442480), transcript variant X3, mRNA}	{NA}	230.267	122.497	169.123	453.51	1.48018	1.85828	-0.32819	1	1	FALSE	1.95597	1.49989	0.38303	1	1	FALSE	2.13733	2.02283	0.079433	1	1	FALSE	4.70744	1.32458	1.8294	0.30473	0.86303	FALSE	5.16593	1.88614	1.4536	0.23846	0.90778	FALSE	5.05143	1.77711	1.5072	0.23183
MD09G1088300_novel01	MD09G1088300	Novel_lncRNA	696	3	{XP_008345537.1; PREDICTED: uncharacterized protein LOC103408465 [Malus domestica]}	{NA}	{mdm:103446245; - - - - -}	{NA}	{NA}	{XR_530407.2; PREDICTED: Malus x domestica uncharacterized LOC103442525 (LOC103442525), transcript variant X2, ncRNA}	{NA}	25.7167	10.3333	34.0867	29.46	3.58197	4.88168	-0.44662	0.66002	0.91091	FALSE	8.64929	3.7047	1.2232	0.18078	1	FALSE	9.42438	5.32418	0.82384	0.37235	0.68523	FALSE	6.35988	3.27711	0.95657	0.3562	0.88503	FALSE	7.05158	8.41775	-0.25549	0.79041	1	FALSE	6.90612	4.67044	0.56432	0.613
MD09G1096800_novel01	MD09G1096800	Novel_lncRNA	309	1	{NA}	{NA}	{NA}	{NA}	{NA}	{XM_008381354.2; PREDICTED: Malus x domestica uncharacterized LOC103442553 (LOC103442553), mRNA}	{NA}	13264.1	19192.3	19155	17405.2	841.401	354.271	1.2479	0.018156	0.13894	FALSE	738.715	862.357	-0.22327	0.64381	1	FALSE	806.114	386.796	1.0594	0.0099646	0.074097	FALSE	567.658	762.628	-0.42596	0.46296	0.90714	FALSE	630.222	718.417	-0.18896	0.68235	1	FALSE	617.257	339.302	0.8633	0.070793
MD09G1106400_novel02	MD09G1106400	Novel_lncRNA	259	1	{NA}	{NA}	{NA}	{NA}	{NA}	{XM_008381402.2; PREDICTED: Malus x domestica transcription factor CPC-like (LOC103442595), mRNA}	{NA}	737.583	584.81	991.027	591.54	9.70092	7.74993	0.32394	0.83206	0.98598	FALSE	14.7919	9.97435	0.56852	0.61629	1	FALSE	16.0669	8.42487	0.93137	0.22501	0.53892	FALSE	7.98685	8.83508	-0.14562	0.94592	1	FALSE	8.76171	14.3994	-0.71673	0.38572	0.98337	FALSE	8.56182	7.40488	0.20944	0.84335
MD09G1118700_novel01	MD09G1118700	Novel_lncRNA	3242	3	{XP_008342275.1; PREDICTED: uncharacterized protein LOC103405083 [Malus domestica]}	{NA}	{mdm:108170056; - - - - -}	{NA}	{NA}	{XR_525929.2; PREDICTED: Malus x domestica uncharacterized LOC103413656 (LOC103413656), transcript variant X1, ncRNA}	{NA}	399.847	302.237	329.19	200.1	637.815	516.378	0.30471	0.57099	0.86768	FALSE	557.42	654.784	-0.23225	0.72252	1	FALSE	607.436	564.184	0.10657	0.73809	0.9201	FALSE	285.563	579.116	-1.02	0.1312	0.78651	FALSE	315.77	542.427	-0.78056	0.12388	0.73923	FALSE	308.295	494.634	-0.68205	0.18344
MD09G1118700_novel07	MD09G1118700	Novel_lncRNA	1173	1	{XP_008342275.1; PREDICTED: uncharacterized protein LOC103405083 [Malus domestica]}	{NA}	{mdm:108170056; - - - - -}	{NA}	{NA}	{XR_525929.2; PREDICTED: Malus x domestica uncharacterized LOC103413656 (LOC103413656), transcript variant X1, ncRNA}	{NA}	634.92	611.857	729.897	590.78	402.918	251.74	0.67855	0.21332	0.5374	FALSE	380.134	413.302	-0.12069	0.87481	1	FALSE	413.965	275.147	0.58931	0.13466	0.40621	FALSE	262.589	365.469	-0.47695	0.4432	0.90298	FALSE	290.954	370.111	-0.34717	0.42041	0.98512	FALSE	284.761	241.136	0.2399	0.60485
MD09G1137700_novel01	MD09G1137700	Novel_lncRNA	275	1	{XP_008357506.1; PREDICTED: 60S ribosomal protein L27-like [Malus domestica]}	{NA}	{mdm:103446703; K02901 RP-L27e, RPL27 large subunit ribosomal protein L27e - ko03010; Genetic Information Processing; Translation; Ribosome}	{At2g32220; KOG3418 60S ribosomal protein L27 J Translation, ribosomal structure and biogenesis ;}	{NA}	{XM_008359284.2; PREDICTED: Malus x domestica 60S ribosomal protein L27-like (LOC103421261), mRNA}	{NA}	11299.2	3779.07	5125.47	6246.52	92.3002	169.991	-0.88106	0.14666	0.45165	FALSE	111.398	94.6523	0.23501	0.72442	1	FALSE	121.367	185.466	-0.61178	0.18794	0.49887	FALSE	117.91	83.7328	0.49382	0.50071	0.91712	FALSE	130.038	108.304	0.26385	0.66371	1	FALSE	127.366	162.714	-0.35336	0.38736
MD09G1151500_novel02	MD09G1151500	Novel_lncRNA	274	1	{NA}	{NA}	{NA}	{NA}	{NA}	{XM_008367395.2; PREDICTED: Malus x domestica ribose-phosphate pyrophosphokinase 4 (LOC103429247), mRNA}	{NA}	985.443	172.467	526.35	1162.87	4.00682	14.2059	-1.826	0.17042	0.48501	FALSE	11.2573	4.10422	1.4557	0.16798	1	FALSE	12.2742	15.437	-0.33077	0.71481	0.91333	FALSE	21.4323	3.63156	2.5611	0.031981	0.43025	FALSE	23.5445	10.9326	1.1068	0.18597	0.86228	FALSE	23.0215	13.5666	0.76292	0.41452
MD09G1156400_novel04	MD09G1156400	Novel_lncRNA	284	1	{NA}	{NA}	{NA}	{NA}	{NA}	{XM_008382025.2; PREDICTED: Malus x domestica citrate synthase, glyoxysomal (LOC103443220), mRNA}	{NA}	624.83	670.19	1050.99	1495.61	19.3965	11.4782	0.75689	0.29599	0.64169	FALSE	27.0633	19.8837	0.44475	0.61174	1	FALSE	29.527	12.5298	1.2367	0.067527	0.27682	FALSE	33.3315	17.5889	0.92222	0.26543	0.85852	FALSE	36.8904	26.2604	0.49036	0.48687	0.98512	FALSE	36.2138	10.9994	1.7191	0.013171
MD09G1158000_novel04	MD09G1158000	Novel_lncRNA	1291	1	{NA}	{NA}	{NA}	{NA}	{NA}	{XM_008382041.2; PREDICTED: Malus x domestica U1 small nuclear ribonucleoprotein A-like (LOC103443231), transcript variant X2, mRNA}	{NA}	458.093	330.393	403.993	264.57	237.919	204.804	0.21623	0.73385	0.94544	FALSE	238.784	244.537	-0.034341	0.9698	1	FALSE	260.175	223.847	0.21697	0.56603	0.82301	FALSE	131.484	216.337	-0.71839	0.28791	0.86303	FALSE	145.236	232.466	-0.67862	0.15088	0.80279	FALSE	141.932	196.167	-0.46688	0.32061
MD09G1172700_novel01	MD09G1172700	Novel_lncRNA	528	1	{NA}	{NA}	{NA}	{NA}	{NA}	{NA}	{NA}	107.787	75.7533	51.46	90.3167	15.6697	12.7455	0.29798	0.80122	0.97959	FALSE	7.70866	16.147	-1.0667	0.26318	1	FALSE	8.38559	13.8639	-0.72535	0.40043	0.70648	FALSE	12.257	14.2814	-0.22053	0.80157	1	FALSE	13.6066	7.46794	0.86553	0.39986	0.98512	FALSE	13.3836	12.1852	0.13533	1
MD09G1172800_novel01	MD09G1172800	Novel_lncRNA	1956	13	{XP_008363128.1; PREDICTED: uncharacterized protein LOC103426825 [Malus domestica]}	{NA}	{NA}	{NA}	{NA}	{XR_001789273.1; PREDICTED: Malus x domestica uncharacterized LOC103429310 (LOC103429310), transcript variant X3, ncRNA}	{NA}	233.267	128.113	124.877	157.427	163.379	171.579	-0.070653	0.79565	0.97959	FALSE	118.531	168.218	-0.50507	0.47225	1	FALSE	129.213	187.456	-0.5368	0.21225	0.52266	FALSE	128.291	148.764	-0.2136	0.84029	1	FALSE	141.812	114.998	0.30237	0.5019	0.98512	FALSE	138.734	164.341	-0.24437	0.58979
MD09G1172800_novel02	MD09G1172800	Novel_lncRNA	1958	5	{XP_008363128.1; PREDICTED: uncharacterized protein LOC103426825 [Malus domestica]}	{NA}	{NA}	{NA}	{NA}	{XR_001789276.1; PREDICTED: Malus x domestica uncharacterized LOC103429310 (LOC103429310), transcript variant X6, ncRNA}	{NA}	161.333	109.413	153.56	81.1933	129.564	118.446	0.12943	0.83616	0.98762	FALSE	147.922	133.046	0.15291	0.76576	1	FALSE	161.167	129.456	0.3161	0.45271	0.75197	FALSE	65.9518	117.689	-0.8355	0.21219	0.8412	FALSE	72.8443	143.892	-0.9821	0.046943	0.63415	FALSE	71.1472	113.438	-0.67302	0.16446
MD09G1172800_novel03	MD09G1172800	Novel_lncRNA	1335	10	{NA}	{NA}	{NA}	{NA}	{NA}	{XR_001791071.1; PREDICTED: Malus x domestica uncharacterized LOC103446001 (LOC103446001), transcript variant X2, ncRNA}	{NA}	125.603	93.2767	113.52	162.047	72.6715	58.232	0.31958	0.59608	0.87704	FALSE	69.8519	74.5834	-0.094554	0.8495	1	FALSE	76.221	63.538	0.26257	0.63416	0.87394	FALSE	84.2114	65.9548	0.35254	0.5978	0.94888	FALSE	93.22	67.7802	0.45978	0.34581	0.97406	FALSE	91.2832	55.7265	0.71199	0.13959
MD09G1172900_novel02	MD09G1172900	Novel_lncRNA	331	1	{NA}	{NA}	{NA}	{NA}	{NA}	{XM_008382512.2; PREDICTED: Malus x domestica pectinesterase 3 (LOC103443625), mRNA}	{NA}	3061.56	776.88	1214.32	1874.63	44.9912	108.519	-1.2702	0.039223	0.2218	FALSE	59.4673	46.1867	0.36462	0.55939	1	FALSE	64.8122	118.501	-0.87056	0.071214	0.28199	FALSE	78.6995	40.8539	0.94588	0.16498	0.81275	FALSE	87.0358	57.8235	0.58995	0.29408	0.95378	FALSE	85.3088	103.977	-0.2855	0.48603
MD09G1180300_novel02	MD09G1180300	Novel_lncRNA	400	1	{NA}	{NA}	{NA}	{NA}	{NA}	{XR_001791999.1; PREDICTED: Malus x domestica uncharacterized LOC103453630 (LOC103453630), ncRNA}	{NA}	2562.63	6825.65	6719.14	3864.92	765.981	164.614	2.2182	0.018376	0.13896	FALSE	562.374	789.609	-0.48961	0.57593	1	FALSE	612.312	179.582	1.7696	4.0784e-05	0.0010031	TRUE	286.899	698.388	-1.2835	0.12586	0.78339	FALSE	317.789	545.56	-0.77967	0.10678	0.71555	FALSE	311.035	157.671	0.98016	0.026468
MD09G1188500_novel09	MD09G1188500	Novel_lncRNA	255	1	{NA}	{NA}	{NA}	{NA}	{NA}	{XM_008353417.2; PREDICTED: Malus x domestica dihydrolipoyllysine-residue acetyltransferase component 3 of pyruvate dehydrogenase complex, mitochondrial-like (LOC103415054), mRNA}	{NA}	1660.34	984.743	1449.5	2592.76	14.7392	15.9241	-0.11155	0.99878	1	FALSE	20.6645	15.0459	0.45779	0.69637	1	FALSE	22.5312	17.3659	0.37567	0.58931	0.84362	FALSE	32.1184	13.3057	1.2714	0.14126	0.7939	FALSE	35.4557	20.0758	0.82056	0.22345	0.89253	FALSE	34.7591	15.2375	1.1898	0.063592
MD09G1194200_novel08	MD09G1194200	Novel_lncRNA	241	1	{NA}	{NA}	{NA}	{NA}	{NA}	{XR_531880.2; PREDICTED: Malus x domestica DEAD-box ATP-dependent RNA helicase 20 (LOC103453559), transcript variant X3, misc_RNA}	{NA}	385.707	472.4	483.803	477.897	5.00576	2.43751	1.0382	0.41512	0.74828	FALSE	5.01451	5.12107	-0.030335	0.98655	1	FALSE	5.47631	2.65227	1.046	0.39322	0.70057	FALSE	4.11003	4.52738	-0.13953	0.97701	1	FALSE	4.51126	4.88012	-0.11339	1	1	FALSE	4.39518	2.32806	0.9168	0.43554
MD09G1195000_novel01	MD09G1195000	Novel_lncRNA	2773	1	{XP_008355875.1; PREDICTED: crocetin glucosyltransferase, chloroplastic-like [Malus domestica]}	{NA}	{mdm:103450107; - - - - -}	{NA}	{NA}	{XR_531878.2; PREDICTED: Malus x domestica uncharacterized LOC103453550 (LOC103453550), transcript variant X2, ncRNA}	{NA}	47.8	38.9233	169.17	120.06	57.7686	52.6416	0.13408	0.90809	1	FALSE	237.773	59.4266	2.0004	0.068538	1	FALSE	259.758	57.4312	2.1773	0.024109	0.1354	FALSE	143.233	52.6476	1.4439	0.17044	0.81275	FALSE	157.699	229.804	-0.54323	0.51507	0.99242	FALSE	154.356	50.4555	1.6132	0.03891
MD09G1195100_novel09	MD09G1195100	Novel_lncRNA	257	1	{NA}	{NA}	{NA}	{NA}	{NA}	{XM_008393088.2; PREDICTED: Malus x domestica ABC transporter C family member 8 (LOC103453551), mRNA}	{NA}	147.413	337.947	608.807	1272.04	5.64979	1.52658	1.8879	0.17735	0.49595	FALSE	9.04802	5.80659	0.63991	0.54936	1	FALSE	9.87093	1.66999	2.5633	0.022033	0.1258	FALSE	16.5608	5.13766	1.6886	0.076117	0.66825	FALSE	18.3376	8.77625	1.0631	0.20616	0.88073	FALSE	18.0069	1.46365	3.6209	0.00023197
MD09G1198500_novel13	MD09G1198500	Novel_lncRNA	2510	3	{NA}	{NA}	{NA}	{NA}	{NA}	{XR_001787616.1; PREDICTED: Malus x domestica uncharacterized LOC103415876 (LOC103415876), transcript variant X3, ncRNA}	{NA}	0	27.2767	1.14	5.43667	53.1457	0	Inf	0.058287	0.28216	FALSE	1.17274	55.0781	-5.5535	0.16099	1	FALSE	1.27019	0	Inf	0.48782	0.77952	FALSE	5.78431	48.7029	-3.0738	0.34479	0.87353	FALSE	6.29082	1.13236	2.4739	0.47355	0.98512	FALSE	6.1457	0	Inf	0.2321
MD09G1198500_novel14	MD09G1198500	Novel_lncRNA	2446	3	{NA}	{NA}	{NA}	{NA}	{NA}	{XR_001787616.1; PREDICTED: Malus x domestica uncharacterized LOC103415876 (LOC103415876), transcript variant X3, ncRNA}	{NA}	58.7733	19.4933	23.7533	14.8467	28.8647	55.3869	-0.94024	0.16143	0.47757	FALSE	29.174	29.5874	-0.020301	0.82628	1	FALSE	31.8884	60.4563	-0.92286	0.048787	0.22049	FALSE	15.5955	26.1736	-0.74698	0.29451	0.86303	FALSE	17.264	28.2147	-0.70868	0.35442	0.97406	FALSE	16.8945	53.0117	-1.6498	0.0035764
MD09G1198500_novel15	MD09G1198500	Novel_lncRNA	2735	2	{NA}	{NA}	{NA}	{NA}	{NA}	{XR_001787616.1; PREDICTED: Malus x domestica uncharacterized LOC103415876 (LOC103415876), transcript variant X3, ncRNA}	{NA}	17.82	25.25	10.07	12.0333	51.6744	19.2216	1.4267	0.42692	0.75778	FALSE	14.7903	53.3863	-1.8518	0.33942	1	FALSE	16.163	21.0225	-0.37923	0.56755	0.82301	FALSE	14.2994	47.2034	-1.7229	0.37457	0.88797	FALSE	15.7439	14.3702	0.13171	0.81063	1	FALSE	15.3731	18.4256	-0.2613	0.77742
MD09G1198500_novel16	MD09G1198500	Novel_lncRNA	2701	2	{NA}	{NA}	{NA}	{NA}	{NA}	{XR_001787616.1; PREDICTED: Malus x domestica uncharacterized LOC103415876 (LOC103415876), transcript variant X3, ncRNA}	{NA}	0	0	0	0	0	0	NA	NA	NA	NA	0	0	NA	NA	NA	NA	0	0	NA	NA	NA	NA	0	0	NA	NA	NA	NA	0	0	NA	NA	NA	NA	0	0	NA	NA
MD09G1198500_novel22	MD09G1198500	Novel_lncRNA	1834	5	{NA}	{NA}	{NA}	{NA}	{NA}	{XR_001787616.1; PREDICTED: Malus x domestica uncharacterized LOC103415876 (LOC103415876), transcript variant X3, ncRNA}	{NA}	5305.2	4085.17	3732.53	2397.37	4593.56	3617.69	0.34454	0.56568	0.86475	FALSE	3338.88	4718.32	-0.49891	0.40436	1	FALSE	3639.95	3953.65	-0.11927	0.78462	0.94079	FALSE	1807.8	4173.1	-1.2069	0.092221	0.71163	FALSE	1995.57	3245.33	-0.70156	0.23706	0.90778	FALSE	1946.66	3465.25	-0.83196	0.17331
MD09G1198500_novel26	MD09G1198500	Novel_lncRNA	2952	1	{NA}	{NA}	{NA}	{NA}	{NA}	{XR_001787616.1; PREDICTED: Malus x domestica uncharacterized LOC103415876 (LOC103415876), transcript variant X3, ncRNA}	{NA}	5.00333	1.26	0.433333	1.39333	2.7483	5.63917	-1.0369	0.34904	0.68416	FALSE	0.586368	2.83815	-2.2751	0.41588	1	FALSE	0.635096	6.17326	-3.281	0.021503	0.12381	FALSE	1.92203	2.50913	-0.38455	1	1	FALSE	2.14066	0.56618	1.9187	0.36146	0.97452	FALSE	2.09276	5.39993	-1.3675	0.2739
MD09G1210400_novel01	MD09G1210400	Novel_lncRNA	1155	1	{NA}	{NA}	{NA}	{NA}	{NA}	{XR_525580.2; PREDICTED: Malus x domestica uncharacterized LOC103411617 (LOC103411617), transcript variant X1, ncRNA}	{NA}	48.25	31.16	29.92	20.69	19.5625	18.7694	0.059707	0.9965	1	FALSE	14.9067	20.1102	-0.43197	0.59927	1	FALSE	16.2394	20.5351	-0.33859	0.62108	0.86246	FALSE	8.93119	17.7912	-0.99424	0.31125	0.86303	FALSE	9.85837	14.4548	-0.55212	0.62116	1	FALSE	9.59885	17.9879	-0.90609	0.28801
MD09G1211800_novel01	MD09G1211800	Novel_lncRNA	1499	2	{NA}	{NA}	{NA}	{NA}	{NA}	{XR_530559.2; PREDICTED: Malus x domestica uncharacterized LOC103443811 (LOC103443811), ncRNA}	{NA}	279.783	199.643	284.357	336.627	174.513	150.586	0.21275	0.70677	0.93316	FALSE	198.971	179.219	0.15083	0.8238	1	FALSE	217.014	164.491	0.39978	0.3879	0.69779	FALSE	200.775	158.525	0.34087	0.56257	0.93548	FALSE	221.777	193.013	0.20042	0.61292	1	FALSE	216.845	144.253	0.58806	0.1689
MD09G1211900	MD09G1211900	Novel_lncRNA	443	2	{NA}	{NA}	{NA}	{NA}	{NA}	{XR_530559.2; PREDICTED: Malus x domestica uncharacterized LOC103443811 (LOC103443811), ncRNA}	{NA}	773.177	301.857	379.28	877.2	40.2532	63.297	-0.65304	0.33397	0.66793	FALSE	41.3988	41.2345	0.0057346	0.92536	1	FALSE	45.1398	69.1214	-0.61473	0.1962	0.50685	FALSE	82.159	36.4664	1.1718	0.089789	0.71163	FALSE	90.668	40.1548	1.175	0.021781	0.58778	FALSE	88.7541	60.6014	0.55046	0.25857
MD09G1211900_novel02	MD09G1211900	Novel_lncRNA	305	2	{NA}	{NA}	{NA}	{NA}	{NA}	{XR_530559.2; PREDICTED: Malus x domestica uncharacterized LOC103443811 (LOC103443811), ncRNA}	{NA}	30945.8	21163.1	30978.8	33317.3	881.464	778.638	0.17895	0.73212	0.94544	FALSE	1086.28	905.163	0.26315	0.65156	1	FALSE	1184.04	850.19	0.47786	0.24332	0.5591	FALSE	1020.46	800.686	0.34991	0.59509	0.94575	FALSE	1127.38	1054.21	0.09681	0.85989	1	FALSE	1103.62	745.682	0.56561	0.26688
MD09G1211900_novel03	MD09G1211900	Novel_lncRNA	206	1	{NA}	{NA}	{NA}	{NA}	{NA}	{XR_530559.2; PREDICTED: Malus x domestica uncharacterized LOC103443811 (LOC103443811), ncRNA}	{NA}	5934.05	3147.52	4897.59	5568.18	9.46252	12.315	-0.38012	0.80784	0.98168	FALSE	13.924	9.73181	0.5168	0.79705	1	FALSE	15.2538	13.4276	0.18397	0.97992	1	FALSE	13.8185	8.61764	0.68123	0.47554	0.91281	FALSE	15.3785	13.4415	0.19422	0.76725	1	FALSE	15.0771	11.8042	0.35306	0.68975
MD09G1214300_novel12	MD09G1214300	Novel_lncRNA	1805	1	{NA}	{sp|Q6H8D5|COB22_ORYSJ; Coatomer subunit beta'-2 OS=Oryza sativa subsp. japonica GN=Os02g0209100 PE=2 SV=1}	{pda:103721627; K17302 COPB2, SEC27 coatomer subunit beta' - -}	{At1g52360; KOG0276 Vesicle coat complex COPI, beta' subunit U Intracellular trafficking, secretion, and vesicular transport ;}	{NA}	{XR_001790111.1; PREDICTED: Malus x domestica coatomer subunit beta'-2-like (LOC103420783), misc_RNA}	{NA}	0.433333	0.316667	0.93	0	0.431246	0.285508	0.59498	1	1	FALSE	0.86443	0.447638	0.94942	0.82599	1	FALSE	0.944193	0.314883	1.5843	0.72292	0.91453	FALSE	0	0.39586	#NAME?	1	1	FALSE	0	0.843446	#NAME?	0.45705	0.98512	FALSE	0	0.274144	#NAME?	1
MD09G1219300_novel02	MD09G1219300	Novel_lncRNA	1334	2	{NA}	{NA}	{NA}	{NA}	{NA}	{XM_008349532.2; PREDICTED: Malus x domestica chaperone protein dnaJ A6, chloroplastic-like (LOC103410881), transcript variant X2, mRNA}	{NA}	2.01	0.946667	2.66333	4.14	0.645268	0.970436	-0.58874	1	1	FALSE	1.66324	0.659428	1.3347	0.6081	1	FALSE	1.81104	1.05953	0.77339	0.68085	0.89375	FALSE	2.1792	0.583436	1.9012	0.48817	0.91345	FALSE	2.42528	1.62436	0.57828	0.9353	1	FALSE	2.38751	0.932356	1.3566	0.52428
MD09G1240200	MD09G1240200	Novel_lncRNA	411	2	{CAN67479.1; hypothetical protein VITISV_035454 [Vitis vinifera]}	{NA}	{pxb:103945434; - - - - -}	{NA}	{NA}	{XM_008367563.2; PREDICTED: Malus x domestica uncharacterized LOC103429412 (LOC103429412), mRNA}	{NA}	5221.65	465.25	576.843	508.23	50.952	354.824	-2.7999	2.6766e-06	0.00014873	TRUE	51.2114	52.4304	-0.033938	0.99458	1	FALSE	55.7298	387.58	-2.798	2.1675e-09	2.3102e-07	TRUE	39.5737	46.3998	-0.22958	0.81866	1	FALSE	43.4398	49.669	-0.19333	0.81512	1	FALSE	42.4098	339.724	-3.0019	8.2865e-10
MD09G1242100_novel03	MD09G1242100	Novel_lncRNA	1766	2	{KYP58799.1; 26S proteasome non-ATPase regulatory subunit 2 [Cajanus cajan]}	{NA}	{pxb:103945447; K03028 PSMD2, RPN1 26S proteasome regulatory subunit N1 - ko03050; Genetic Information Processing; Folding, sorting and degradation; Proteasome | ko05169; Human Diseases; Infectious diseases: Viral; Epstein-Barr virus infection}	{At2g20580; KOG2005 26S proteasome regulatory complex, subunit RPN1/PSMD2 O Posttranslational modification, protein turnover, chaperones ;}	{NA}	{XM_017325892.1; PREDICTED: Malus x domestica 26S proteasome non-ATPase regulatory subunit 2 homolog A-like (LOC103411860), mRNA}	{NA}	2.36667	0.93	1.35	2.32333	1.15853	1.54967	-0.41967	0.92433	1	FALSE	1.22324	1.19525	0.033385	1	1	FALSE	1.33909	1.68897	-0.33489	0.97384	1	FALSE	1.70854	1.05664	0.69329	0.8003	1	FALSE	1.90039	1.18907	0.67646	0.81734	1	FALSE	1.86441	1.48331	0.3299	0.99244
MD09G1250900_novel01	MD09G1250900	Novel_lncRNA	1062	3	{NA}	{NA}	{NA}	{NA}	{NA}	{XM_009359555.2; PREDICTED: Pyrus x bretschneideri UPF0481 protein At3g47200-like (LOC103948515), transcript variant X1, mRNA}	{NA}	83.4367	26.0467	15.8067	14.19	15.9945	28.8542	-0.85121	0.18799	0.51227	FALSE	6.80341	16.4757	-1.276	0.19284	1	FALSE	7.40725	31.457	-2.0864	0.0045564	0.040469	TRUE	5.45072	14.57	-1.4185	0.29311	0.86303	FALSE	5.99271	6.56901	-0.13247	0.94481	1	FALSE	5.80345	27.5903	-2.2492	0.014529
MD09G1258200_novel01	MD09G1258200	Novel_lncRNA	2465	1	{NA}	{NA}	{NA}	{NA}	{NA}	{AB545981.1; Pyrus pyrifolia genes for F-box proteins, S ribonuclease, complete cds, haplotype: S4}	{NA}	861.19	5269.24	4522.29	3650.46	8673.76	830.849	3.384	5.656e-05	0.002126	TRUE	5677.8	8903.37	-0.64902	0.28714	1	FALSE	6188.65	906.572	2.7711	2.5474e-10	3.2582e-08	TRUE	3890.29	7871.4	-1.0167	0.15872	0.81275	FALSE	4315.17	5523.75	-0.35623	0.55077	1	FALSE	4217.24	796.237	2.405	0.0009401
MD09G1258200_novel02	MD09G1258200	Annotated_lncRNA	439	1	{NA}	{NA}	{NA}	{NA}	{NA}	{NM_001328920.1; Malus domestica beta-amyrin synthase-like (LOC103432258), mRNA}	{NA}	108830	235823	148786	200624	33876.3	8781.8	1.9477	0.047241	0.25084	FALSE	16358.3	34875.4	-1.0922	0.21756	1	FALSE	17850.7	9591.66	0.89613	0.061546	0.25894	FALSE	18823.1	30837.1	-0.71216	0.39486	0.89123	FALSE	20959.7	15895.6	0.39899	0.5831	1	FALSE	20573.7	8413.41	1.29	0.087429
MD09G1258200_novel03	MD09G1258200	Novel_lncRNA	1276	1	{NA}	{NA}	{NA}	{NA}	{NA}	{AB545981.1; Pyrus pyrifolia genes for F-box proteins, S ribonuclease, complete cds, haplotype: S4}	{NA}	109.287	437.243	119.817	2.84667	383.876	47.4596	3.0159	0.34159	0.67787	FALSE	74.1016	397.794	-2.4244	0.3831	1	FALSE	81.5372	51.8429	0.65331	0.86702	0.97822	FALSE	1.62909	351.748	-7.7543	0.057444	0.58973	FALSE	1.84003	71.4063	-5.2782	0.19082	0.86228	FALSE	1.82607	45.3763	-4.6351	0.0072202
MD09G1258200_novel04	MD09G1258200	Novel_lncRNA	762	1	{NA}	{NA}	{NA}	{NA}	{NA}	{XM_017334020.1; PREDICTED: Malus x domestica heparan-alpha-glucosaminide N-acetyltransferase-like (LOC103440802), transcript variant X3, mRNA}	{NA}	1028.74	0.0833333	0	549.427	0	225.594	#NAME?	6.0964e-21	7.7913e-18	TRUE	0	0	NA	NA	NA	NA	0	246.562	#NAME?	1.8182e-31	2.3254e-28	TRUE	136.323	0	Inf	0.0001077	0.011426	TRUE	151.35	0	Inf	8.0725e-05	0.070749	FALSE	149.148	216.121	-0.53509	0.24626
MD09G1258200_novel05	MD09G1258200	Novel_lncRNA	2753	1	{NA}	{NA}	{NA}	{NA}	{NA}	{XR_525889.2; PREDICTED: Malus x domestica probable S-sulfocysteine synthase, chloroplastic (LOC103413454), transcript variant X4, misc_RNA}	{NA}	69.9133	754.243	443.03	602.823	1381.86	76.043	4.1837	5.4606e-07	3.4893e-05	TRUE	618.816	1416.9	-1.1952	0.028784	1	FALSE	675.094	82.6842	3.0294	2.2579e-11	3.2087e-09	TRUE	728.057	1252.65	-0.78286	0.23295	0.85576	FALSE	808.652	599.764	0.43112	0.37229	0.97823	FALSE	790.898	72.7454	3.4426	0.00014208
MD09G1258200_novel06	MD09G1258200	Novel_lncRNA	2500	2	{NA}	{NA}	{NA}	{NA}	{NA}	{XR_525889.2; PREDICTED: Malus x domestica probable S-sulfocysteine synthase, chloroplastic (LOC103413454), transcript variant X4, misc_RNA}	{NA}	42.1767	100.78	77.9433	32.3433	172.447	40.4561	2.0917	0.079888	0.33807	FALSE	101.477	176.821	-0.80113	0.38222	1	FALSE	110.674	44.4822	1.315	0.18878	0.49887	FALSE	35.2486	156.282	-2.1485	0.05641	0.58973	FALSE	39.3061	98.9144	-1.3314	0.11514	0.71725	FALSE	38.4777	38.7928	-0.011768	0.97266
MD09G1258200_novel07	MD09G1258200	Novel_lncRNA	2510	2	{NA}	{NA}	{NA}	{NA}	{NA}	{XR_525889.2; PREDICTED: Malus x domestica probable S-sulfocysteine synthase, chloroplastic (LOC103413454), transcript variant X4, misc_RNA}	{NA}	3.17333	63.79	11.86	44.0967	110.759	3.10091	5.1586	0.035712	0.21228	FALSE	13.4865	114.709	-3.0884	0.15873	1	FALSE	14.6072	3.35796	2.121	0.47603	0.77314	FALSE	48.1455	101.496	-1.0759	0.54515	0.9346	FALSE	53.3988	13.0221	2.0358	0.011132	0.46356	FALSE	52.234	2.95496	4.1438	4.8349e-09
MD09G1258200_novel08	MD09G1258200	Novel_lncRNA	2461	2	{NA}	{NA}	{NA}	{NA}	{NA}	{XR_525889.2; PREDICTED: Malus x domestica probable S-sulfocysteine synthase, chloroplastic (LOC103413454), transcript variant X4, misc_RNA}	{NA}	0.0333333	2.28333	269.247	1.18	3.30835	0	Inf	0.031329	0.1992	FALSE	340.835	3.38533	6.6536	0.029191	1	FALSE	370.069	0	Inf	0.0026938	0.027563	TRUE	1.10749	2.99452	-1.435	0.48923	0.91345	FALSE	1.22064	334.383	-8.0977	0.016589	0.58778	FALSE	1.17973	0	Inf	0.42044
MD09G1258200_novel09	MD09G1258200	Annotated_lncRNA	399	2	{NA}	{NA}	{NA}	{NA}	{NA}	{NM_001328920.1; Malus domestica beta-amyrin synthase-like (LOC103432258), mRNA}	{NA}	46.8333	99.2133	147.577	79.63	11.0656	3.09113	1.8399	0.084304	0.34422	FALSE	12.2832	11.3686	0.11163	0.91868	1	FALSE	13.39	3.37827	1.9868	0.033942	0.16606	FALSE	5.94017	10.0517	-0.75887	0.4327	0.90298	FALSE	6.62118	11.9128	-0.84735	0.31229	0.9543	FALSE	6.50627	2.96395	1.1343	0.34523
MD09G1258200_novel10	MD09G1258200	Novel_lncRNA	491	2	{NA}	{NA}	{NA}	{NA}	{NA}	{NM_001328920.1; Malus domestica beta-amyrin synthase-like (LOC103432258), mRNA}	{NA}	602.967	1565.02	1109.37	1522.8	284.076	62.0298	2.1952	0.028508	0.1878	FALSE	157.461	292.822	-0.89502	0.31247	1	FALSE	172.173	67.712	1.3464	0.070971	0.28199	FALSE	179.463	258.975	-0.52912	0.62912	0.95614	FALSE	198.938	152.764	0.38102	0.44395	0.98512	FALSE	194.327	59.4053	1.7098	0.007183
MD09G1285000_novel04	MD09G1285000	Novel_lncRNA	2583	1	{NA}	{NA}	{NA}	{NA}	{NA}	{XM_008350401.2; PREDICTED: Malus x domestica NADH dehydrogenase [ubiquinone] 1 alpha subcomplex assembly factor 3-like (LOC103411779), transcript variant X1, mRNA}	{NA}	132.56	43.1067	70.0467	65.71	69.5299	133.453	-0.94063	0.11951	0.40948	FALSE	89.8976	71.313	0.33412	0.60868	1	FALSE	97.8733	145.844	-0.57544	0.21231	0.52266	FALSE	73.0874	63.0743	0.21257	0.77002	1	FALSE	80.753	87.2762	-0.11207	0.81229	1	FALSE	79.0036	127.847	-0.69443	0.12553
MD10G1001500_novel15	MD10G1001500	Novel_lncRNA	2549	2	{XP_008381682.1; PREDICTED: probable inactive tRNA-specific adenosine deaminase-like protein 3 isoform X1 [Malus domestica]}	{NA}	{mdm:103444520; K15442 TAD3, ADAT3 tRNA-specific adenosine deaminase 3 - -}	{At5g24670; KOG2771 Subunit of tRNA-specific adenosine-34 deaminase A RNA processing and modification ;}	{NA}	{XM_008383466.2; PREDICTED: Malus x domestica probable inactive tRNA-specific adenosine deaminase-like protein 3 (LOC103444520), transcript variant X6, mRNA}	{NA}	250.54	355.58	385.153	228.017	573.284	248.77	1.2044	0.028346	0.1878	FALSE	504.504	588.382	-0.22189	0.72824	1	FALSE	549.931	271.852	1.0164	0.012506	0.084928	FALSE	250.681	520.392	-1.0537	0.10467	0.73696	FALSE	277.345	491.113	-0.82437	0.087322	0.67994	FALSE	271.162	238.337	0.18615	0.63899
MD10G1003200_novel05	MD10G1003200	Novel_lncRNA	2282	1	{XP_008381660.1; PREDICTED: RNA-binding protein 7 [Malus domestica]}	{NA}	{mdm:103444508; K12831 SF3B4, SAP49 splicing factor 3B subunit 4 - ko03040; Genetic Information Processing; Transcription; Spliceosome}	{NA}	{NA}	{XM_008383438.1; PREDICTED: Malus x domestica RNA-binding protein 7 (LOC103444508), mRNA}	{NA}	368.28	270.267	231.733	290.303	400.965	322.262	0.31525	0.59509	0.87704	FALSE	264.886	411.972	-0.63717	0.30899	1	FALSE	288.698	351.764	-0.28504	0.5224	0.7938	FALSE	283.892	364.306	-0.35981	0.56404	0.93548	FALSE	314.913	257.46	0.29061	0.6165	1	FALSE	308.717	308.516	0.00094091	0.93012
MD10G1009000_novel09	MD10G1009000	Novel_lncRNA	312	1	{NA}	{NA}	{NA}	{NA}	{NA}	{XM_017330682.1; PREDICTED: Malus x domestica F-box protein SKP2A-like (LOC108172723), partial mRNA}	{NA}	1603.67	4214.94	2533.19	1356.39	203.934	44.8582	2.1847	0.0013433	0.021195	TRUE	99.0436	209.903	-1.0836	0.10133	1	FALSE	107.926	49.0587	1.1375	0.014149	0.091859	FALSE	45.5424	185.638	-2.0272	0.0036934	0.13829	FALSE	50.2833	96.3237	-0.93781	0.070581	0.64828	FALSE	49.1059	42.9996	0.19157	0.64284
MD10G1021000_novel11	MD10G1021000	Novel_lncRNA	1982	3	{NA}	{NA}	{NA}	{NA}	{NA}	{XR_001954012.1; PREDICTED: Pyrus x bretschneideri uncharacterized LOC103957787 (LOC103957787), ncRNA}	{NA}	26.24	14.5667	21.48	26.3533	16.4053	19.4739	-0.24738	0.83128	0.98598	FALSE	20.0872	16.8051	0.25738	0.86992	1	FALSE	21.8785	21.2391	0.042793	1	1	FALSE	21.3304	14.8685	0.52065	0.61746	0.95592	FALSE	23.3555	19.4336	0.26521	0.71327	1	FALSE	22.775	18.6281	0.28997	0.69419
MD10G1021700_novel01	MD10G1021700	Novel_lncRNA	1467	3	{NA}	{NA}	{NA}	{NA}	{NA}	{XM_008380265.1; PREDICTED: Malus x domestica extensin-3 (LOC103441585), transcript variant X1, mRNA}	{NA}	5164.86	4055.04	12423	42986.5	3138.88	2752.12	0.1897	0.80458	0.9809	FALSE	8297.72	3224.52	1.3636	0.1867	1	FALSE	9057.65	3000.66	1.5939	0.12357	0.39025	FALSE	24526.8	2854.38	3.1031	0.07811	0.67643	FALSE	26883.9	8013.7	1.7462	0.19981	0.87214	FALSE	26297.7	2638.37	3.3172	0.054496
MD10G1021700_novel02	MD10G1021700	Novel_lncRNA	926	2	{NA}	{NA}	{NA}	{NA}	{NA}	{XM_017333865.1; PREDICTED: Malus x domestica extensin-3 (LOC103441585), transcript variant X3, mRNA}	{NA}	241.243	372.1	909.263	3114	151.515	71.2103	1.0893	0.49836	0.81383	FALSE	336.353	155.729	1.1109	0.30516	1	FALSE	366.837	77.6766	2.2396	0.01304	0.086864	FALSE	987.745	137.929	2.8402	0.087472	0.71163	FALSE	1081.94	325.205	1.7342	0.18362	0.86228	FALSE	1057.25	68.2855	3.9526	0.025222
MD10G1021800_novel02	MD10G1021800	Novel_lncRNA	1123	2	{NA}	{NA}	{NA}	{NA}	{GO:0005199; structural constituent of cell wall; molecular_function GO:0009664; plant-type cell wall organization; biological_process}	{XM_017333865.1; PREDICTED: Malus x domestica extensin-3 (LOC103441585), transcript variant X3, mRNA}	{PF04554:Extensin-like region}	284.49	159.48	702.563	2483.49	88.1088	108.473	-0.29999	0.819	0.98598	FALSE	334.172	90.5252	1.8842	0.093424	1	FALSE	364.573	118.261	1.6242	0.12223	0.38791	FALSE	1019.37	80.1389	3.669	0.045576	0.54734	FALSE	1118.24	322.703	1.7929	0.18927	0.86228	FALSE	1094.55	103.958	3.3963	0.047154
MD10G1021800_novel07	MD10G1021800	Novel_lncRNA	759	3	{NA}	{NA}	{NA}	{NA}	{NA}	{XM_008380265.1; PREDICTED: Malus x domestica extensin-3 (LOC103441585), transcript variant X1, mRNA}	{NA}	1871.94	1442.54	5073.51	17903	471.795	415.072	0.1848	0.77688	0.9707	FALSE	1417.07	484.333	1.5488	0.11887	1	FALSE	1546.41	452.451	1.7731	0.074132	0.28498	FALSE	4293.41	428.673	3.3242	0.054588	0.58973	FALSE	4707.78	1368.92	1.782	0.17581	0.85486	FALSE	4605.24	397.788	3.5332	0.03621
MD10G1026600	MD10G1026600	Novel_lncRNA	1020	2	{XP_018504962.1; PREDICTED: 26S proteasome non-ATPase regulatory subunit 9-like [Pyrus x bretschneideri]}	{NA}	{pxb:103955609; K06693 PSMD9 26S proteasome non-ATPase regulatory subunit 9 - -}	{NA}	{NA}	{XR_001791185.1; PREDICTED: Malus x domestica uncharacterized LOC108174372 (LOC108174372), ncRNA}	{NA}	97.6467	23.6867	35.78	33.7267	12.4029	32.1518	-1.3742	0.068281	0.3116	FALSE	14.8966	12.6988	0.23029	0.8844	1	FALSE	16.2134	35.1136	-1.1148	0.071	0.28199	FALSE	12.4787	11.2308	0.152	0.89513	1	FALSE	13.814	14.4322	-0.063163	1	1	FALSE	13.4893	30.7784	-1.1901	0.073943
MD10G1028400_novel01	MD10G1028400	Novel_lncRNA	958	1	{NA}	{NA}	{NA}	{NA}	{NA}	{NA}	{NA}	2.94333	1.44667	1.67333	3.12333	0.645268	0.879619	-0.44698	1	1	FALSE	0.65199	0.659428	-0.016364	1	1	FALSE	0.712444	0.96363	-0.4357	0.9781	1	FALSE	1.02076	0.583436	0.807	0.97251	1	FALSE	1.11014	0.628714	0.82027	0.86393	1	FALSE	1.08453	0.842084	0.36504	1
MD10G1031800_novel03	MD10G1031800	Novel_lncRNA	412	1	{NA}	{NA}	{NA}	{NA}	{NA}	{XM_008383622.2; PREDICTED: Malus x domestica U3 small nucleolar ribonucleoprotein protein IMP4-like (LOC103444671), mRNA}	{NA}	2531.69	846.44	1082.23	1531.81	91.996	173.084	-0.91183	0.12101	0.41241	FALSE	99.0728	94.4327	0.069203	0.9215	1	FALSE	107.899	188.975	-0.80852	0.074004	0.28498	FALSE	122.033	83.5545	0.54648	0.42821	0.90298	FALSE	135.011	96.2368	0.48842	0.36056	0.97452	FALSE	132.292	165.687	-0.32474	0.40983
MD10G1052800_novel04	MD10G1052800	Novel_lncRNA	205	1	{NA}	{NA}	{NA}	{NA}	{NA}	{XM_008360134.2; PREDICTED: Malus x domestica protein DMR6-LIKE OXYGENASE 2-like (LOC103422099), transcript variant X1, mRNA}	{NA}	370.047	3649.42	10376.2	43851.8	9.66352	0.594111	4.0237	0.049936	0.2601	FALSE	29.3035	9.85659	1.5719	0.42854	1	FALSE	32.1392	0.648748	5.6305	0.036058	0.17403	FALSE	106.733	8.7094	3.6153	0.0045885	0.1468	FALSE	119.048	28.3105	2.0721	0.051533	0.635	FALSE	117.13	0.567941	7.6882	1.4309e-05
MD10G1056800_novel03	MD10G1056800	Novel_lncRNA	271	1	{NA}	{NA}	{NA}	{NA}	{NA}	{XM_008367670.2; PREDICTED: Malus x domestica heat shock 70 kDa protein, mitochondrial (LOC103429530), mRNA}	{NA}	9723.58	5769.7	7475.77	11367.2	134.105	132.315	0.019389	0.97753	1	FALSE	149.64	137.974	0.1171	0.79387	1	FALSE	163.117	144.226	0.17758	0.70697	0.91042	FALSE	200.263	122.08	0.71408	0.27252	0.86303	FALSE	222.287	145.284	0.61355	0.25677	0.92214	FALSE	218.231	126.533	0.78635	0.14913
MD10G1073400_novel01	MD10G1073400	Novel_lncRNA	1974	6	{XP_009355573.1; PREDICTED: kinesin-3-like isoform X1 [Pyrus x bretschneideri]}	{NA}	{pxb:103946576; K10405 KIFC1 kinesin family member C1 - -}	{NA}	{NA}	{XR_530102.2; PREDICTED: Malus x domestica uncharacterized LOC103440393 (LOC103440393), transcript variant X2, ncRNA}	{NA}	52.5867	52.8333	51.3433	42.15	66.0838	38.8554	0.76618	0.26194	0.59797	FALSE	48.7554	68.02	-0.4804	0.53689	1	FALSE	53.0779	42.4023	0.32397	0.5232	0.7938	FALSE	34.818	60.1651	-0.78909	0.27688	0.86303	FALSE	38.544	47.3456	-0.29673	0.58455	1	FALSE	37.7178	37.1776	0.020811	0.99664
MD10G1073900_novel07	MD10G1073900	Novel_lncRNA	1783	3	{XP_008357174.1; PREDICTED: uncharacterized protein LOC103420919 [Malus domestica]}	{NA}	{mdm:103448493; - - - - -}	{NA}	{NA}	{XM_008358952.2; PREDICTED: Malus x domestica uncharacterized LOC103420919 (LOC103420919), mRNA}	{NA}	365.773	245.24	333.14	648.67	273.766	241.187	0.18279	0.76422	0.96637	FALSE	289.354	281.207	0.041206	0.98363	1	FALSE	316.214	263.194	0.26478	0.7104	0.91042	FALSE	477.239	248.667	0.9405	0.14592	0.80066	FALSE	528.622	280.121	0.91619	0.050977	0.635	FALSE	518.166	230.865	1.1664	0.016186
MD10G1089000_novel06	MD10G1089000	Novel_lncRNA	267	1	{XP_018497789.1; PREDICTED: pentatricopeptide repeat-containing protein At2g15820, chloroplastic [Pyrus x bretschneideri]}	{NA}	{NA}	{NA}	{NA}	{XM_018642273.1; PREDICTED: Pyrus x bretschneideri pentatricopeptide repeat-containing protein At2g15820, chloroplastic (LOC103968009), mRNA}	{NA}	538.417	225.293	274.78	126.347	4.70972	7.0008	-0.57188	0.67708	0.91956	FALSE	5.30769	4.82109	0.13873	1	1	FALSE	5.79386	7.66289	-0.40336	0.71327	0.91227	FALSE	2.0488	4.26247	-1.0569	0.43765	0.90298	FALSE	2.27043	5.16321	-1.1853	0.35927	0.97406	FALSE	2.22592	6.71369	-1.5927	0.15686
MD10G1104500_novel04	MD10G1104500	Novel_lncRNA	1048	1	{OAE24531.1; hypothetical protein AXG93_2415s1100 [Marchantia polymorpha subsp. polymorpha]}	{NA}	{fve:101291188; - - - - -}	{NA}	{GO:0008168; methyltransferase activity; molecular_function}	{XM_009344740.2; PREDICTED: Pyrus x bretschneideri zinc finger protein-like 1 (LOC103934974), mRNA}	{PF01234:NNMT/PNMT/TEMT family}	14.59	6.42667	2.54333	5.15667	3.22634	5.00381	-0.63313	0.75775	0.96455	FALSE	1.09199	3.29714	-1.5943	0.30825	1	FALSE	1.18439	5.43874	-2.1991	0.12262	0.38818	FALSE	1.91476	2.91718	-0.60741	0.72637	0.98871	FALSE	2.09051	1.064	0.97436	0.65932	1	FALSE	2.03591	4.78303	-1.2323	0.39964
MD10G1109100_novel01	MD10G1109100	Novel_lncRNA	1532	1	{XP_007200521.1; hypothetical protein PRUPE_ppa009413mg [Prunus persica]}	{NA}	{pper:PRUPE_ppa009413mg; K09761 rsmE 16S rRNA (uracil1498-N3)-methyltransferase 2.1.1.193 -}	{NA}	{NA}	{LN713255.1; Cucumis melo genomic chromosome, chr_1}	{NA}	34.0667	9.60333	17.4633	27.9133	8.31287	18.7478	-1.1733	0.1601	0.47473	FALSE	12.6269	8.53249	0.56546	0.56942	1	FALSE	13.7764	20.4961	-0.57315	0.40047	0.70648	FALSE	16.8516	7.54874	1.1586	0.24217	0.85748	FALSE	18.5083	12.2526	0.59509	0.46083	0.98512	FALSE	18.1032	17.9566	0.011736	1
MD10G1117100_novel01	MD10G1117100	Novel_lncRNA	928	5	{XP_008393617.1; PREDICTED: cytokinin riboside 5'-monophosphate phosphoribohydrolase LOG8 isoform X1 [Malus domestica]}	{sp|Q84MC2|LOG8_ARATH; Cytokinin riboside 5'-monophosphate phosphoribohydrolase LOG8 OS=Arabidopsis thaliana GN=LOG8 PE=1 SV=1}	{pxb:103952322; K06966 K06966 uncharacterized protein - -}	{NA}	{NA}	{XR_526875.2; PREDICTED: Malus x domestica uncharacterized LOC103419148 (LOC103419148), transcript variant X1, ncRNA}	{NA}	3574.89	1129.58	1045.02	1192.36	559.931	1037.24	-0.88943	0.080285	0.33863	FALSE	393.892	576.297	-0.54901	0.40681	1	FALSE	429.187	1132.72	-1.4001	0.00067123	0.0099827	TRUE	387.902	509.713	-0.39399	0.61401	0.95387	FALSE	428.925	382.282	0.16609	0.71348	1	FALSE	419.579	993.098	-1.243	0.012416
MD10G1117100_novel02	MD10G1117100	Novel_lncRNA	2250	4	{XP_008393617.1; PREDICTED: cytokinin riboside 5'-monophosphate phosphoribohydrolase LOG8 isoform X1 [Malus domestica]}	{sp|Q84MC2|LOG8_ARATH; Cytokinin riboside 5'-monophosphate phosphoribohydrolase LOG8 OS=Arabidopsis thaliana GN=LOG8 PE=1 SV=1}	{pxb:103952322; K06966 K06966 uncharacterized protein - -}	{NA}	{NA}	{XR_001788854.1; PREDICTED: Malus x domestica uncharacterized LOC103425787 (LOC103425787), transcript variant X3, ncRNA}	{NA}	256.563	167.247	147.313	123.533	241.12	221.375	0.12326	0.89172	0.99879	FALSE	165.401	248.035	-0.58458	0.36744	1	FALSE	180.336	241.769	-0.42294	0.32736	0.64548	FALSE	117.32	219.388	-0.90303	0.19766	0.83251	FALSE	129.589	160.615	-0.30966	0.5866	1	FALSE	126.57	212.006	-0.74417	0.1182
MD10G1127400_novel03	MD10G1127400	Novel_lncRNA	543	1	{XP_008382093.1; PREDICTED: V-type proton ATPase subunit B2 [Malus domestica]}	{sp|Q9SZN1|VATB2_ARATH; V-type proton ATPase subunit B2 OS=Arabidopsis thaliana GN=VHA-B2 PE=1 SV=1}	{mdm:103444907; K02147 ATPeV1B, ATP6B V-type H+-transporting ATPase subunit B - ko00190; Metabolism; Energy metabolism; Oxidative phosphorylation | ko04150; Environmental Information Processing; Signal transduction; mTOR signaling pathway | ko04145; Cellular Processes; Transport and catabolism; Phagosome | ko04966; Organismal Systems; Excretory system; Collecting duct acid secretion | ko04721; Or…	{At4g38510; KOG1351 Vacuolar H+-ATPase V1 sector, subunit B C Energy production and conversion ;}	{NA}	{XM_008383872.2; PREDICTED: Malus x domestica V-type proton ATPase subunit B2 (LOC103444907), transcript variant X2, mRNA}	{NA}	2829.71	1857.68	2008.3	3048.11	393.354	353.176	0.15544	0.80253	0.97959	FALSE	333.139	404.097	-0.27857	0.64706	1	FALSE	363.29	385.594	-0.085959	0.81476	0.9542	FALSE	433.431	357.353	0.27845	0.6724	0.95854	FALSE	480.013	323.363	0.56992	0.26108	0.92214	FALSE	470.452	338.168	0.47631	0.34938
MD10G1138700_novel01	MD10G1138700	Annotated_lncRNA	235	1	{NA}	{NA}	{NA}	{NA}	{NA}	{XM_008384202.2; PREDICTED: Malus x domestica SEC1 family transport protein SLY1-like (LOC103445213), mRNA}	{NA}	1252.57	557.537	368.997	1024.6	5.68501	7.21532	-0.3439	0.71332	0.93692	FALSE	3.07321	5.88342	-0.93691	0.6924	1	FALSE	3.35617	7.85338	-1.2265	0.24028	0.55774	FALSE	7.44039	5.20281	0.51609	0.54549	0.9346	FALSE	8.20154	2.9785	1.4613	0.1719	0.85415	FALSE	8.02881	6.9049	0.21757	0.84188
MD10G1139000_novel06	MD10G1139000	Novel_lncRNA	304	2	{NA}	{NA}	{NA}	{NA}	{NA}	{XM_008384195.2; PREDICTED: Malus x domestica sorcin-like (LOC103445209), transcript variant X1, mRNA}	{NA}	4088.93	1675.74	2551.43	3247.79	68.3469	100.951	-0.56271	0.36377	0.70227	FALSE	88.4557	70.087	0.33581	0.62682	1	FALSE	96.4073	110.374	-0.19518	0.65675	0.88606	FALSE	98.3999	61.9878	0.66667	0.34137	0.87353	FALSE	108.891	85.8811	0.34247	0.53247	1	FALSE	106.712	96.7111	0.14197	0.84431
MD10G1148700_novel01	MD10G1148700	Novel_lncRNA	1601	1	{NA}	{NA}	{NA}	{NA}	{GO:0019087; transformation of host cell by virus; biological_process GO:0016021; integral to membrane; cellular_component}	{NR_120976.1; Malus domestica microRNA MIR535d (MIR535D), microRNA}	{PF05297:Herpesvirus latent membrane protein 1 (LMP1)}	120.217	81.99	84.1433	61.7833	75.7655	69.8756	0.11675	0.88562	0.99621	FALSE	63.7513	77.85	-0.28824	0.64071	1	FALSE	69.5252	76.5104	-0.13812	0.7222	0.91453	FALSE	40.2075	68.876	-0.77654	0.25829	0.85748	FALSE	44.6017	61.862	-0.47195	0.41528	0.98512	FALSE	43.6251	66.9827	-0.61863	0.21574
MD10G1156700_novel01	MD10G1156700	Novel_lncRNA	469	1	{NA}	{NA}	{NA}	{NA}	{NA}	{NA}	{NA}	0	0	0	0	0	0	NA	NA	NA	NA	0	0	NA	NA	NA	NA	0	0	NA	NA	NA	NA	0	0	NA	NA	NA	NA	0	0	NA	NA	NA	NA	0	0	NA	NA
MD10G1166800_novel06	MD10G1166800	Novel_lncRNA	544	2	{NA}	{NA}	{NA}	{NA}	{NA}	{XR_001787145.1; PREDICTED: Malus x domestica uncharacterized LOC103412179 (LOC103412179), transcript variant X5, misc_RNA}	{NA}	933.32	530.923	741.717	848.297	110.262	116.553	-0.080057	0.87883	0.99481	FALSE	121.467	113.271	0.10079	0.87211	1	FALSE	132.38	127.192	0.057676	0.93777	1	FALSE	120.445	100.186	0.2657	0.67504	0.95906	FALSE	133.107	117.791	0.17636	0.72031	1	FALSE	130.324	111.555	0.22435	0.65063
MD10G1173200_novel03	MD10G1173200	Novel_lncRNA	1156	6	{OAP00813.1; hypothetical protein AXX17_AT4G33040 [Arabidopsis thaliana]}	{NA}	{aip:107639210; - - - - -}	{At5g43910; KOG2947 Carbohydrate kinase G Carbohydrate transport and metabolism ;}	{NA}	{XR_530779.2; PREDICTED: Malus x domestica uncharacterized LOC103445448 (LOC103445448), ncRNA}	{NA}	1173.49	866.57	804.06	644.877	553.419	456.831	0.27671	0.65468	0.90551	FALSE	410.034	568.928	-0.4725	0.47917	1	FALSE	446.652	499.401	-0.16105	0.74711	0.92177	FALSE	278.524	503.26	-0.8535	0.23081	0.85576	FALSE	307.382	398.877	-0.37591	0.48644	0.98512	FALSE	299.937	437.652	-0.54513	0.30018
MD10G1189300_novel01	MD10G1189300	Novel_lncRNA	2260	4	{XP_009354271.1; PREDICTED: seed biotin-containing protein SBP65 [Pyrus x bretschneideri]}	{sp|O80831|BAM7_ARATH; Beta-amylase 7 OS=Arabidopsis thaliana GN=BAM7 PE=2 SV=2}	{pxb:103945426; - - - - -}	{NA}	{NA}	{XR_526333.2; PREDICTED: Malus x domestica uncharacterized LOC103416101 (LOC103416101), transcript variant X2, ncRNA}	{NA}	436.68	375.97	305.683	300.9	548.326	380.267	0.52802	0.31565	0.6613	FALSE	352.819	562.567	-0.67309	0.23335	1	FALSE	385.176	415.313	-0.10868	0.79122	0.94079	FALSE	288.747	497.415	-0.78464	0.23787	0.85748	FALSE	319.115	342.884	-0.10365	0.92229	1	FALSE	311.738	364.349	-0.22499	0.71442
MD10G1189300_novel03	MD10G1189300	Novel_lncRNA	1946	4	{XP_009354271.1; PREDICTED: seed biotin-containing protein SBP65 [Pyrus x bretschneideri]}	{sp|O80831|BAM7_ARATH; Beta-amylase 7 OS=Arabidopsis thaliana GN=BAM7 PE=2 SV=2}	{pxb:103945426; - - - - -}	{NA}	{NA}	{XR_526333.2; PREDICTED: Malus x domestica uncharacterized LOC103416101 (LOC103416101), transcript variant X2, ncRNA}	{NA}	16.0933	112.817	68.6	35.71	140.117	11.7038	3.5816	0.01597	0.12756	FALSE	67.3008	144.79	-1.1053	0.46527	1	FALSE	73.239	12.6679	2.5314	0.11097	0.36722	FALSE	29.5414	128.12	-2.1167	0.095936	0.7201	FALSE	33.007	65.8714	-0.99688	0.37477	0.97865	FALSE	32.4171	11.1446	1.5404	0.28203
MD10G1189300_novel04	MD10G1189300	Novel_lncRNA	2043	4	{XP_009354271.1; PREDICTED: seed biotin-containing protein SBP65 [Pyrus x bretschneideri]}	{sp|O80831|BAM7_ARATH; Beta-amylase 7 OS=Arabidopsis thaliana GN=BAM7 PE=2 SV=2}	{pxb:103945426; - - - - -}	{NA}	{NA}	{XR_526333.2; PREDICTED: Malus x domestica uncharacterized LOC103416101 (LOC103416101), transcript variant X2, ncRNA}	{NA}	241.293	894.097	330.873	392.637	1292.76	185.491	2.801	0.11291	0.39466	FALSE	340.014	1332.62	-1.9706	0.20871	1	FALSE	371.701	202.955	0.87298	0.2156	0.52469	FALSE	340.03	1178.1	-1.7927	0.25866	0.85748	FALSE	377.775	329.49	0.19729	0.65434	1	FALSE	369.63	177.682	1.0568	0.097124
MD10G1189300_novel05	MD10G1189300	Novel_lncRNA	1909	4	{XP_009354271.1; PREDICTED: seed biotin-containing protein SBP65 [Pyrus x bretschneideri]}	{sp|O80831|BAM7_ARATH; Beta-amylase 7 OS=Arabidopsis thaliana GN=BAM7 PE=2 SV=2}	{pxb:103945426; - - - - -}	{NA}	{NA}	{XR_526333.2; PREDICTED: Malus x domestica uncharacterized LOC103416101 (LOC103416101), transcript variant X2, ncRNA}	{NA}	871.24	1023.12	753.37	618.297	1244.91	623.823	0.99684	0.070484	0.31496	FALSE	717.255	1277.83	-0.83314	0.13821	1	FALSE	783.092	682.602	0.19814	0.67438	0.89375	FALSE	495.558	1129.82	-1.189	0.074145	0.66005	FALSE	550.43	696.817	-0.34022	0.56561	1	FALSE	538.376	597.972	-0.15146	0.79371
MD10G1189300_novel09	MD10G1189300	Novel_lncRNA	2253	3	{XP_009354271.1; PREDICTED: seed biotin-containing protein SBP65 [Pyrus x bretschneideri]}	{sp|O80831|BAM7_ARATH; Beta-amylase 7 OS=Arabidopsis thaliana GN=BAM7 PE=2 SV=2}	{pxb:103945426; - - - - -}	{NA}	{NA}	{XR_526333.2; PREDICTED: Malus x domestica uncharacterized LOC103416101 (LOC103416101), transcript variant X2, ncRNA}	{NA}	254.473	284.45	198.933	107.483	401.911	219.986	0.86946	0.098027	0.36524	FALSE	226.49	411.642	-0.86195	0.11697	1	FALSE	247.073	240.507	0.038859	0.9447	1	FALSE	102.673	363.971	-1.8258	0.0054082	0.16011	FALSE	113.364	220.056	-0.9569	0.066366	0.64311	FALSE	110.561	210.804	-0.93106	0.057549
MD10G1189300_novel10	MD10G1189300	Novel_lncRNA	2199	3	{XP_009354271.1; PREDICTED: seed biotin-containing protein SBP65 [Pyrus x bretschneideri]}	{sp|O80831|BAM7_ARATH; Beta-amylase 7 OS=Arabidopsis thaliana GN=BAM7 PE=2 SV=2}	{pxb:103945426; - - - - -}	{NA}	{NA}	{XR_526333.2; PREDICTED: Malus x domestica uncharacterized LOC103416101 (LOC103416101), transcript variant X2, ncRNA}	{NA}	0	0	0	0	0	0	NA	NA	NA	NA	0	0	NA	NA	NA	NA	0	0	NA	NA	NA	NA	0	0	NA	NA	NA	NA	0	0	NA	NA	NA	NA	0	0	NA	NA
MD10G1189300_novel13	MD10G1189300	Novel_lncRNA	2405	2	{XP_009354271.1; PREDICTED: seed biotin-containing protein SBP65 [Pyrus x bretschneideri]}	{sp|O80831|BAM7_ARATH; Beta-amylase 7 OS=Arabidopsis thaliana GN=BAM7 PE=2 SV=2}	{pxb:103945426; - - - - -}	{NA}	{NA}	{XR_526333.2; PREDICTED: Malus x domestica uncharacterized LOC103416101 (LOC103416101), transcript variant X2, ncRNA}	{NA}	0	0	0	0	0	0	NA	NA	NA	NA	0	0	NA	NA	NA	NA	0	0	NA	NA	NA	NA	0	0	NA	NA	NA	NA	0	0	NA	NA	NA	NA	0	0	NA	NA
MD10G1189500_novel01	MD10G1189500	Novel_lncRNA	2103	4	{NA}	{NA}	{NA}	{NA}	{NA}	{XR_001791046.1; PREDICTED: Malus x domestica uncharacterized LOC103445689 (LOC103445689), transcript variant X9, ncRNA}	{NA}	129.107	88.6667	99.06	78.5233	113.605	103.35	0.13649	0.80237	0.97959	FALSE	102.426	116.647	-0.18757	0.73966	1	FALSE	111.669	112.857	-0.015271	0.96507	1	FALSE	69.5815	103.184	-0.56845	0.38186	0.88797	FALSE	76.9684	99.3827	-0.36873	0.48503	0.98512	FALSE	75.2839	98.9936	-0.39499	0.41481
MD10G1190100	MD10G1190100	Novel_lncRNA	680	3	{XP_008380348.1; PREDICTED: DNA-directed RNA polymerase III subunit 1-like [Malus domestica]}	{sp|Q67VP4|RAC4_ORYSJ; Rac-like GTP-binding protein 4 OS=Oryza sativa subsp. japonica GN=RAC4 PE=2 SV=1}	{osa:4330693; K04392 RAC1 Ras-related C3 botulinum toxin substrate 1 - ko04014; Environmental Information Processing; Signal transduction; Ras signaling pathway | ko04015; Environmental Information Processing; Signal transduction; Rap1 signaling pathway | ko04010; Environmental Information Processing; Signal transduction; MAPK signaling pathway | ko04013; Environmental Information Processing; Sig…	{At5g62880; KOG0393 Ras-related small GTPase, Rho type R General function prediction only ;}	{NA}	{XR_530803.2; PREDICTED: Malus x domestica uncharacterized LOC103445691 (LOC103445691), ncRNA}	{NA}	2911.92	13697.3	9464.1	3521.92	4388.51	534.124	3.0385	0.00029379	0.007795	TRUE	2344.99	4515.32	-0.94525	0.16988	1	FALSE	2556.95	584.097	2.1301	6.6536e-05	0.0015196	TRUE	733.795	3992.89	-2.444	0.0044138	0.1468	FALSE	813.416	2282.89	-1.4888	0.020608	0.58778	FALSE	793.114	511.671	0.63231	0.37524
MD10G1194400_novel01	MD10G1194400	Novel_lncRNA	2427	7	{XP_018506510.1; PREDICTED: uncharacterized protein LOC108865331 [Pyrus x bretschneideri]}	{sp|Q9SFU6|CALS9_ARATH; Callose synthase 9 OS=Arabidopsis thaliana GN=CALS9 PE=2 SV=2}	{pmum:103324716; K11000 CALS callose synthase 2.4.1.- -}	{At3g07160; KOG0916 1,3-beta-glucan synthase/callose synthase catalytic subunit M Cell wall/membrane/envelope biogenesis ;}	{NA}	{XR_001792014.1; PREDICTED: Malus x domestica uncharacterized LOC103453359 (LOC103453359), transcript variant X16, misc_RNA}	{NA}	159.9	135.543	113.343	93.87	227.887	150.46	0.59894	0.5807	0.87244	FALSE	137.828	235.143	-0.77067	0.47759	1	FALSE	150.347	164.317	-0.12819	0.72362	0.91453	FALSE	98.133	207.959	-1.0835	0.35257	0.88003	FALSE	108.643	133.644	-0.2988	0.61402	1	FALSE	106.21	144.103	-0.44018	0.36204
MD10G1194400_novel05	MD10G1194400	Novel_lncRNA	2372	6	{XP_017185004.1; PREDICTED: LOW QUALITY PROTEIN: callose synthase 9-like [Malus domestica]}	{sp|Q9SFU6|CALS9_ARATH; Callose synthase 9 OS=Arabidopsis thaliana GN=CALS9 PE=2 SV=2}	{pmum:103324716; K11000 CALS callose synthase 2.4.1.- -}	{At3g07160; KOG0916 1,3-beta-glucan synthase/callose synthase catalytic subunit M Cell wall/membrane/envelope biogenesis ;}	{NA}	{XR_001792014.1; PREDICTED: Malus x domestica uncharacterized LOC103453359 (LOC103453359), transcript variant X16, misc_RNA}	{NA}	62.3467	45.08	41.0867	56.53	75.7441	56.5997	0.42034	0.80795	0.98168	FALSE	48.5973	78.2282	-0.68681	0.64319	1	FALSE	52.9849	61.7528	-0.22092	0.63393	0.87394	FALSE	57.5234	69.1791	-0.26619	0.9662	1	FALSE	63.7583	47.1629	0.43496	0.34413	0.97406	FALSE	62.2897	54.1556	0.20188	0.61524
MD10G1194400_novel06	MD10G1194400	Novel_lncRNA	1934	1	{XP_017191675.1; PREDICTED: uncharacterized protein LOC103449565 [Malus domestica]}	{NA}	{mdm:103449565; - - - - -}	{NA}	{GO:0005887; integral to plasma membrane; cellular_component}	{XR_001787156.1; PREDICTED: Malus x domestica uncharacterized LOC108170705 (LOC108170705), ncRNA}	{PF11023:Zinc-ribbon containing domain}	1.22	4.84333	0	2.56333	6.21748	0.970436	2.6796	0.056345	0.27702	FALSE	0	6.37579	#NAME?	0.0020856	1	FALSE	0	1.05953	#NAME?	0.55258	0.81423	FALSE	2.03636	5.63762	-1.4691	0.19338	0.83251	FALSE	2.30004	0	Inf	0.41791	0.98512	FALSE	2.28259	0.932356	1.2917	0.8037
MD10G1194400_novel07	MD10G1194400	Novel_lncRNA	1842	2	{XP_017185004.1; PREDICTED: LOW QUALITY PROTEIN: callose synthase 9-like [Malus domestica]}	{sp|Q9SFU6|CALS9_ARATH; Callose synthase 9 OS=Arabidopsis thaliana GN=CALS9 PE=2 SV=2}	{pmum:103324716; K11000 CALS callose synthase 2.4.1.- -}	{At3g07160; KOG0916 1,3-beta-glucan synthase/callose synthase catalytic subunit M Cell wall/membrane/envelope biogenesis ;}	{GO:0005887; integral to plasma membrane; cellular_component}	{XR_001792014.1; PREDICTED: Malus x domestica uncharacterized LOC103453359 (LOC103453359), transcript variant X16, misc_RNA}	{PF11023:Zinc-ribbon containing domain}	16.1633	4.29333	10.04	24.75	4.46368	10.9434	-1.2938	0.25555	0.59489	FALSE	9.61472	4.55652	1.0773	0.45257	1	FALSE	10.5064	11.9462	-0.18529	0.8637	0.97822	FALSE	18.4104	4.03045	2.1915	0.11719	0.77959	FALSE	20.1721	9.37462	1.1055	0.29546	0.95378	FALSE	19.5888	10.4741	0.9032	0.29792
MD10G1196700_novel02	MD10G1196700	Novel_lncRNA	201	1	{NA}	{NA}	{NA}	{NA}	{NA}	{XM_018645581.1; PREDICTED: Pyrus x bretschneideri probable glutathione S-transferase (LOC103939615), mRNA}	{NA}	393.013	1372.49	2382.89	2859.84	3.44677	0.608987	2.5008	0.20909	0.5374	FALSE	5.1503	3.55704	0.53398	0.6912	1	FALSE	5.62221	0.668061	3.0731	0.089824	0.31304	FALSE	5.7937	3.14617	0.88089	0.4991	0.9155	FALSE	6.47086	4.96718	0.38153	0.80977	1	FALSE	6.37292	0.584929	3.4456	0.049275
MD10G1199200_novel01	MD10G1199200	Novel_lncRNA	1491	2	{NA}	{NA}	{NA}	{NA}	{NA}	{XR_001791037.1; PREDICTED: Malus x domestica uncharacterized LOC103445774 (LOC103445774), transcript variant X1, ncRNA}	{NA}	593.187	578.877	795.553	652.453	486.246	316.791	0.61815	0.25074	0.58689	FALSE	559.706	499.123	0.16528	0.79397	1	FALSE	610.423	346.18	0.81829	0.049757	0.22174	FALSE	388.769	441.571	-0.18373	0.77363	1	FALSE	430.604	543.875	-0.33691	0.5012	0.98512	FALSE	421.298	303.446	0.4734	0.29948
MD10G1202500_novel01	MD10G1202500	Novel_lncRNA	231	1	{NA}	{NA}	{NA}	{NA}	{NA}	{XM_008384825.2; PREDICTED: Malus x domestica protein Iojap, chloroplastic (LOC103445783), mRNA}	{NA}	571.483	92.3	167.833	149.753	0.862492	2.7148	-1.6543	0.32708	0.66517	FALSE	1.32923	0.895275	0.57019	0.91022	1	FALSE	1.45934	2.96748	-1.0239	0.45864	0.75788	FALSE	0.961017	0.79172	0.27957	0.97337	1	FALSE	1.07033	1.28578	-0.26459	1	1	FALSE	1.04638	2.59954	-1.3128	0.49295
MD10G1203900_novel03	MD10G1203900	Novel_lncRNA	240	1	{NA}	{NA}	{NA}	{NA}	{NA}	{XM_008384859.2; PREDICTED: Malus x domestica uncharacterized protein At4g15545 (LOC103445803), mRNA}	{NA}	132.23	193.517	164.753	176.913	2.04664	0.932466	1.1341	0.59311	0.87704	FALSE	1.55679	2.09519	-0.4285	0.84043	1	FALSE	1.69954	1.02124	0.73482	0.83407	0.96519	FALSE	1.49505	1.85138	-0.30841	0.8874	1	FALSE	1.66011	1.50634	0.14023	1	1	FALSE	1.63606	0.895714	0.86911	0.8546
MD10G1219600_novel02	MD10G1219600	Novel_lncRNA	315	1	{NA}	{NA}	{NA}	{NA}	{NA}	{XM_008367758.2; PREDICTED: Malus x domestica pentatricopeptide repeat-containing protein At2g26790, mitochondrial-like (LOC103429618), mRNA}	{NA}	191.627	120.34	173.503	284.123	5.35055	5.41472	-0.017201	1	1	FALSE	6.96126	5.48255	0.3445	0.77688	1	FALSE	7.57015	5.91565	0.35579	0.69319	0.89997	FALSE	9.84551	4.85203	1.0209	0.34413	0.87353	FALSE	10.8375	6.78634	0.67532	0.49583	0.98512	FALSE	10.588	5.18208	1.0308	0.24322
MD10G1225400_novel01	MD10G1225400	Novel_lncRNA	826	1	{NA}	{NA}	{NA}	{NA}	{NA}	{XM_008360336.1; PREDICTED: Malus x domestica uncharacterized LOC103422290 (LOC103422290), mRNA}	{NA}	865.987	302.863	497.333	705.493	118.756	213.44	-0.84583	0.14853	0.45413	FALSE	160.388	121.877	0.39615	0.55214	1	FALSE	174.903	232.918	-0.41327	0.31919	0.63944	FALSE	193.538	107.816	0.84404	0.20773	0.83852	FALSE	213.307	155.569	0.45537	0.4009	0.98512	FALSE	208.919	204.311	0.032176	0.9978
MD10G1225700_novel01	MD10G1225700	Novel_lncRNA	1944	5	{XP_009363275.1; PREDICTED: uncharacterized protein LOC103953264 [Pyrus x bretschneideri]}	{NA}	{jcu:105629060; K11799 WDR21A WD repeat-containing protein 21A - -}	{At5g17370; KOG2695 WD40 repeat protein R General function prediction only ;}	{NA}	{XM_008373711.2; PREDICTED: Malus x domestica DDB1- and CUL4-associated factor 4 (LOC103435325), transcript variant X2, mRNA}	{NA}	3.31	1.43	3.29	1.90667	1.39693	2.39132	-0.77555	0.72104	0.94222	FALSE	2.91672	1.4378	1.0205	0.60829	1	FALSE	3.16703	2.6143	0.2767	0.92386	1	FALSE	1.51112	1.27408	0.24617	0.96565	1	FALSE	1.65558	2.82508	-0.77095	0.75859	1	FALSE	1.60782	2.28875	-0.50945	0.92237
MD10G1231900_novel02	MD10G1231900	Novel_lncRNA	631	1	{NA}	{NA}	{NA}	{NA}	{NA}	{KU851961.1; Malus prunifolia voucher MPRUN20160302 chloroplast, complete genome}	{NA}	18.5567	5.83333	4.64667	13.5467	1.34373	3.00031	-1.1589	0.54292	0.85031	FALSE	1.07642	1.37833	-0.35668	0.87966	1	FALSE	1.18469	3.28236	-1.4702	0.26452	0.57832	FALSE	2.47214	1.22048	1.0183	0.59092	0.94374	FALSE	2.72591	1.03687	1.3945	0.32162	0.96429	FALSE	2.6542	2.87368	-0.11462	1
MD10G1231900_novel03	MD10G1231900	Novel_lncRNA	273	1	{NA}	{NA}	{NA}	{NA}	{NA}	{XM_009355694.2; PREDICTED: Pyrus x bretschneideri proteasome subunit alpha type-5 (LOC103945159), mRNA}	{NA}	3304.37	850.007	1134.04	2509.74	20.0994	47.6865	-1.2464	0.070324	0.31496	FALSE	23.4261	20.6006	0.18543	0.79899	1	FALSE	25.4829	52.0415	-1.0301	0.079313	0.29318	FALSE	45.6112	18.2198	1.3239	0.085422	0.71163	FALSE	50.3079	22.8114	1.141	0.14435	0.78839	FALSE	49.3137	45.6481	0.11143	0.93009
MD10G1263100_novel05	MD10G1263100	Novel_lncRNA	342	1	{XP_009360880.1; PREDICTED: la-related protein 6A [Pyrus x bretschneideri]}	{NA}	{mdm:103446194; K15191 LARP7 La-related protein 7 - -}	{NA}	{NA}	{XM_008385265.2; PREDICTED: Malus x domestica la-related protein 6A-like (LOC103446194), mRNA}	{NA}	5818.31	2841.25	3887.7	5910.43	186.409	228.403	-0.29311	0.60253	0.87762	FALSE	210.117	191.431	0.13437	0.84841	1	FALSE	229.141	249.291	-0.12159	0.7325	0.9201	FALSE	279.049	169.324	0.72074	0.28489	0.86303	FALSE	309.455	203.767	0.60281	0.23662	0.90778	FALSE	303.598	218.643	0.47358	0.368
MD10G1266600_novel01	MD10G1266600	Novel_lncRNA	315	1	{NA}	{NA}	{NA}	{NA}	{NA}	{XM_008385290.2; PREDICTED: Malus x domestica coatomer subunit zeta-2-like (LOC103446214), mRNA}	{NA}	5932.94	1788.33	2331.94	4421.33	87.3666	169.782	-0.95853	0.092234	0.3572	FALSE	95.3451	89.7443	0.087339	0.87847	1	FALSE	104.005	185.379	-0.83382	0.05822	0.24739	FALSE	154.441	79.3703	0.96038	0.14422	0.79986	FALSE	170.803	92.6137	0.88304	0.082395	0.66977	FALSE	167.506	162.534	0.043473	0.95976
MD10G1281900_novel01	MD10G1281900	Novel_lncRNA	2083	2	{NA}	{NA}	{NA}	{NA}	{NA}	{XR_531596.2; PREDICTED: Malus x domestica uncharacterized LOC103450698 (LOC103450698), ncRNA}	{NA}	19.7733	14.1833	29.31	19.3133	16.8622	15.5924	0.11295	0.81147	0.98248	FALSE	29.8235	17.2574	0.78924	0.34438	1	FALSE	32.5049	17.0131	0.93401	0.14603	0.42839	FALSE	16.9129	15.2674	0.14767	0.92635	1	FALSE	18.6998	28.932	-0.62964	0.37607	0.97865	FALSE	18.2742	14.924	0.29217	0.64832
MD10G1290700_novel01	MD10G1290700	Novel_lncRNA	598	4	{XP_008358677.1; PREDICTED: protein yippee-like At5g53940 [Malus domestica]}	{sp|Q9FN32|YIPL7_ARATH; Protein yippee-like At5g53940 OS=Arabidopsis thaliana GN=At5g53940 PE=2 SV=1}	{pxb:103944177; - - - - -}	{At5g53940; KOG3399 Predicted Yippee-type zinc-binding protein R General function prediction only ;}	{NA}	{XM_008360455.2; PREDICTED: Malus x domestica protein yippee-like At5g53940 (LOC103422390), mRNA}	{NA}	907.91	436.453	307.72	1046.13	114.765	134.689	-0.23094	0.63954	0.90014	FALSE	60.7613	117.997	-0.95752	0.19205	1	FALSE	66.3509	146.897	-1.1466	0.0089616	0.069889	FALSE	175.802	104.324	0.75288	0.22321	0.84967	FALSE	194.511	58.8633	1.7244	0.00036889	0.094213	FALSE	190.641	128.904	0.56457	0.23676
MD10G1294700_novel01	MD10G1294700	Novel_lncRNA	375	1	{NA}	{NA}	{NA}	{NA}	{NA}	{XM_008385517.2; PREDICTED: Malus x domestica clavaminate synthase-like protein At3g21360 (LOC103446409), mRNA}	{NA}	52.3133	9.27	4.68	6.26	0.698464	2.82871	-2.0179	0.32842	0.66517	FALSE	0.293184	0.718898	-1.294	0.90198	1	FALSE	0.317548	3.08237	-3.279	0.10703	0.35835	FALSE	0.407272	0.63704	-0.64539	1	1	FALSE	0.460009	0.28309	0.7004	1	1	FALSE	0.456517	2.70946	-2.5693	0.18223
MD10G1306500_novel01	MD10G1306500	Novel_lncRNA	2634	3	{XP_017189060.1; PREDICTED: uncharacterized protein LOC108173805 isoform X1 [Malus domestica]}	{NA}	{mdm:108173805; - - - - -}	{NA}	{NA}	{XR_001791229.1; PREDICTED: Malus x domestica uncharacterized LOC103446830 (LOC103446830), transcript variant X8, misc_RNA}	{NA}	276.1	148.56	190.777	176.307	241.851	283.204	-0.22772	0.7435	0.95294	FALSE	253.037	247.851	0.029873	0.96561	1	FALSE	275.781	309.261	-0.16531	0.67822	0.89375	FALSE	198.127	219.216	-0.14593	0.82384	1	FALSE	217.83	245.572	-0.17294	0.82266	1	FALSE	212.534	271.136	-0.35132	0.51424
MD10G1312600_novel01	MD10G1312600	Novel_lncRNA	2057	2	{XP_017185674.1; PREDICTED: ribulose bisphosphate carboxylase/oxygenase activase, chloroplastic-like [Malus domestica]}	{NA}	{NA}	{NA}	{NA}	{HQ445899.1; Malus x domestica cultivar Evereste fire blight resistance locus LG12, complete sequence}	{NA}	4.88	2.52667	1.22	9.80333	2.68746	3.99384	-0.57153	0.77622	0.9707	FALSE	1.17274	2.75665	-1.233	0.56885	1	FALSE	1.27019	4.36088	-1.7796	0.2151	0.52469	FALSE	8.36865	2.44095	1.7776	0.12838	0.78374	FALSE	9.30273	1.13236	3.0383	0.020129	0.58778	FALSE	9.09408	3.82569	1.2492	0.17462
MD10G1331400_novel01	MD10G1331400	Novel_lncRNA	263	1	{NA}	{NA}	{NA}	{NA}	{NA}	{XM_008351099.2; PREDICTED: Malus x domestica V-type proton ATPase subunit e1-like (LOC103412553), mRNA}	{NA}	1235.32	614.437	608.633	1069.88	11.7897	14.3513	-0.28366	0.77358	0.9702	FALSE	10.2868	12.0922	-0.23327	0.8073	1	FALSE	11.2097	15.658	-0.48215	0.55402	0.8154	FALSE	15.7499	10.6918	0.55884	0.59025	0.94374	FALSE	17.4427	9.99245	0.80371	0.36562	0.97671	FALSE	17.1223	13.7345	0.31807	0.76919
MD10G1333700_novel01	MD10G1333700	Novel_lncRNA	2440	2	{XP_009356401.1; PREDICTED: erlin-1 [Pyrus x bretschneideri]}	{NA}	{pxb:103947251; - - - - -}	{NA}	{NA}	{XR_001791220.1; PREDICTED: Malus x domestica uncharacterized LOC103446791 (LOC103446791), ncRNA}	{NA}	134.11	72.8233	47.66	82.2033	119.791	126.157	-0.074697	0.8695	0.99393	FALSE	58.5932	122.972	-1.0695	0.12723	1	FALSE	63.8333	137.85	-1.1107	0.01751	0.10715	FALSE	86.7936	108.711	-0.32484	0.63207	0.95614	FALSE	96.3585	56.9788	0.75799	0.1396	0.78839	FALSE	94.3359	120.792	-0.35665	0.41284
MD10G1335600_novel03	MD10G1335600	Novel_lncRNA	396	1	{XP_008384163.1; PREDICTED: ras-related protein RABA5a isoform X2 [Malus domestica]}	{NA}	{mdm:103446800; K07904 RAB11A Ras-related protein Rab-11A - ko04144; Cellular Processes; Transport and catabolism; Endocytosis | ko04972; Organismal Systems; Digestive system; Pancreatic secretion | ko04962; Organismal Systems; Excretory system; Vasopressin-regulated water reabsorption | ko04961; Organismal Systems; Excretory system; Endocrine and other factor-regulated calcium reabsorption}	{NA}	{NA}	{XM_008351106.2; PREDICTED: Malus x domestica ras-related protein RABA5a (LOC103412564), transcript variant X2, mRNA}	{NA}	276.643	110.423	135.783	140.76	11.058	17.2016	-0.63745	0.46453	0.79368	FALSE	10.7314	11.3466	-0.080422	0.9318	1	FALSE	11.6729	18.7793	-0.68599	0.36336	0.67384	FALSE	10.1297	10.0372	0.013234	1	1	FALSE	11.1928	10.3897	0.10741	0.89903	1	FALSE	10.9398	16.4753	-0.59072	0.46598
MD11G1000900_novel01	MD11G1000900	Novel_lncRNA	3367	5	{NA}	{NA}	{NA}	{NA}	{NA}	{XM_018645400.1; PREDICTED: Pyrus x bretschneideri protein cornichon homolog 4-like (LOC103938957), transcript variant X2, mRNA}	{NA}	57.5067	39.9067	49.34	43.67	80.1913	77.5083	0.049094	0.79628	0.97959	FALSE	86.4636	82.0155	0.076196	0.95084	1	FALSE	94.2881	84.6102	0.15624	0.74824	0.92177	FALSE	65.076	72.5567	-0.15698	0.7498	0.9997	FALSE	71.9893	83.9574	-0.22188	0.73351	1	FALSE	70.338	74.2194	-0.077491	0.96005
MD11G1000900_novel03	MD11G1000900	Novel_lncRNA	3223	4	{NA}	{NA}	{NA}	{NA}	{NA}	{XM_018645400.1; PREDICTED: Pyrus x bretschneideri protein cornichon homolog 4-like (LOC103938957), transcript variant X2, mRNA}	{NA}	34.9433	13.71	19.4933	5.92	33.5717	44.7094	-0.41333	0.52318	0.8275	FALSE	34.4304	34.6577	-0.0094945	0.89086	1	FALSE	37.6133	48.8656	-0.37757	0.60628	0.85143	FALSE	8.30617	30.6394	-1.8831	0.45201	0.90355	FALSE	9.15482	33.5856	-1.8752	0.27984	0.94537	FALSE	8.84797	42.8297	-2.2752	0.0015464
MD11G1001300_novel07	MD11G1001300	Novel_lncRNA	310	1	{NA}	{NA}	{NA}	{NA}	{NA}	{XM_008360608.2; PREDICTED: Malus x domestica E3 ubiquitin-protein ligase RING1-like (LOC103422542), mRNA}	{NA}	13171.4	16006.9	11941	10361.3	741.476	354.381	1.0651	0.061966	0.29549	FALSE	457.381	762.173	-0.73672	0.23409	1	FALSE	498.621	387.566	0.3635	0.37523	0.68658	FALSE	342.037	674.041	-0.97868	0.13539	0.78796	FALSE	379.545	444.71	-0.22859	0.59386	1	FALSE	371.787	339.544	0.13088	0.82604
MD11G1004900_novel04	MD11G1004900	Novel_lncRNA	409	2	{NA}	{NA}	{NA}	{NA}	{NA}	{XM_008351183.2; PREDICTED: Malus x domestica mitochondrial dicarboxylate/tricarboxylate transporter DTC-like (LOC103412641), mRNA}	{NA}	6501.66	1160.3	1779.68	4710.08	130.99	434.601	-1.7302	0.0022802	0.032024	TRUE	158.856	134.522	0.23988	0.74231	1	FALSE	173.264	474.435	-1.4532	0.00044163	0.0073356	TRUE	366.201	118.974	1.622	0.014826	0.31456	FALSE	404.022	153.763	1.3937	0.028686	0.5962	FALSE	395.927	415.911	-0.071038	0.78092
MD11G1006000_novel01	MD11G1006000	Novel_lncRNA	3302	1	{AEJ72556.1; hypothetical protein [Malus domestica]}	{NA}	{NA}	{NA}	{NA}	{AM167520.1; Malus x domestica transposon gene for putative DNA topoisomerase II, hypothetical protein, putative CC-NBS-LRR resistance protein, and putative cyclin-related protein}	{NA}	136.403	90.3367	104.43	79.9967	193.005	179.6	0.10385	0.84694	0.98974	FALSE	179.508	198.092	-0.14212	0.82058	1	FALSE	195.647	196.264	-0.0045394	0.99138	1	FALSE	116.19	175.202	-0.59253	0.38534	0.88797	FALSE	128.24	174.498	-0.44436	0.40127	0.98512	FALSE	125.182	172.039	-0.45871	0.36767
MD11G1036800_novel07	MD11G1036800	Novel_lncRNA	352	1	{NA}	{NA}	{NA}	{NA}	{NA}	{XM_008386376.2; PREDICTED: Malus x domestica farnesyl pyrophosphate synthase 2-like (LOC103447197), mRNA}	{NA}	5371.4	10628.6	10256	11074.8	760.267	234.208	1.6987	0.0020101	0.029192	TRUE	634.222	778.123	-0.29501	0.54126	1	FALSE	691.856	255.693	1.4361	0.0067897	0.056026	FALSE	574.264	688.007	-0.26071	0.55297	0.93548	FALSE	637.015	617.424	0.045066	0.94436	1	FALSE	624.964	224.294	1.4784	0.0028295
MD11G1045900_novel01	MD11G1045900	Novel_lncRNA	885	1	{XP_009346692.1; PREDICTED: high mobility group B protein 10-like isoform X1 [Pyrus x bretschneideri]}	{NA}	{pper:PRUPE_ppa008470mg; - - - - -}	{NA}	{NA}	{XM_009348418.2; PREDICTED: Pyrus x bretschneideri high mobility group B protein 10-like (LOC103938418), transcript variant X2, mRNA}	{NA}	100.007	26.4267	42.22	31.2367	11.5705	27.3248	-1.2398	0.13799	0.44342	FALSE	14.9568	11.8062	0.34126	0.87724	1	FALSE	16.3171	29.8391	-0.87082	0.16234	0.45211	FALSE	9.51253	10.436	-0.13366	0.82034	1	FALSE	10.5176	14.4902	-0.46227	0.6365	1	FALSE	10.2833	26.1752	-1.3479	0.053456
MD11G1061700_novel02	MD11G1061700	Novel_lncRNA	346	1	{NP_001315926.1; CBL-interacting serine/threonine-protein kinase 10-like [Malus domestica]}	{NA}	{NA}	{NA}	{NA}	{XM_017335937.1; PREDICTED: Malus x domestica CBL-interacting serine/threonine-protein kinase 10-like (LOC103447312), transcript variant X2, mRNA}	{NA}	1742.68	2754.15	2769.66	2784.65	193.29	71.9204	1.4263	0.016848	0.13291	FALSE	157.482	198.824	-0.33631	0.64122	1	FALSE	171.683	78.5145	1.1287	0.011737	0.082426	FALSE	137.078	175.858	-0.35941	0.56973	0.93703	FALSE	152.264	153.018	-0.0071255	0.88544	1	FALSE	149.391	68.8847	1.1168	0.018729
MD11G1077700_novel01	MD11G1077700	Novel_lncRNA	1378	1	{XP_018506301.1; PREDICTED: uncharacterized protein LOC108868203 [Pyrus x bretschneideri]}	{NA}	{NA}	{NA}	{NA}	{XR_001954311.1; PREDICTED: Pyrus x bretschneideri uncharacterized LOC108868204 (LOC108868204), ncRNA}	{NA}	40.63	7.05	22.0167	20.71	5.54339	19.7612	-1.8338	0.037925	0.21833	FALSE	13.9717	5.68765	1.2966	0.16633	1	FALSE	15.2354	21.5461	-0.5	0.48944	0.77952	FALSE	11.2014	5.03045	1.1549	0.26483	0.85852	FALSE	12.3974	13.5655	-0.1299	0.87594	1	FALSE	12.1476	18.9159	-0.63893	0.36087
MD11G1085200_novel01	MD11G1085200	Novel_lncRNA	486	2	{NP_001235712.1; uncharacterized protein LOC100305717 [Glycine max]}	{NA}	{mdm:103447678; - - - - -}	{NA}	{NA}	{XR_531091.2; PREDICTED: Malus x domestica uncharacterized LOC103447464 (LOC103447464), ncRNA}	{NA}	3411.48	1563.96	1769.62	2261.11	256.878	341.384	-0.41031	0.47121	0.79539	FALSE	236.296	263.653	-0.15805	0.77175	1	FALSE	257.585	372.666	-0.53284	0.20322	0.51162	FALSE	258.337	233.199	0.1477	0.84386	1	FALSE	285.247	229.411	0.31428	0.52397	0.99456	FALSE	279.237	326.798	-0.22691	0.5906
MD11G1094400_novel03	MD11G1094400	Novel_lncRNA	345	1	{NA}	{NA}	{NA}	{NA}	{NA}	{XR_001786655.1; PREDICTED: Malus x domestica uncharacterized LOC108170296 (LOC108170296), transcript variant X3, ncRNA}	{NA}	369.747	205.677	418.443	290.84	13.7511	15.0131	-0.12668	0.97881	1	FALSE	23.2389	14.0751	0.7234	0.35325	1	FALSE	25.2856	16.3837	0.62606	0.3043	0.62371	FALSE	14.0101	12.4451	0.17089	0.93115	1	FALSE	15.4683	22.625	-0.5486	0.39636	0.98512	FALSE	15.1349	14.3731	0.074507	0.94745
MD11G1121300_novel13	MD11G1121300	Novel_lncRNA	1296	2	{NA}	{NA}	{NA}	{NA}	{NA}	{XM_017335840.1; PREDICTED: Malus x domestica uncharacterized LOC103447830 (LOC103447830), mRNA}	{NA}	294.483	344.883	178.69	249.62	290.238	132.238	1.1341	0.47314	0.79563	FALSE	106.994	299.848	-1.4867	0.38744	1	FALSE	116.708	144.456	-0.30772	0.50044	0.78267	FALSE	126.831	265.149	-1.0639	0.49025	0.91345	FALSE	141.143	104.066	0.43966	0.47785	0.98512	FALSE	138.508	126.629	0.12936	0.89581
MD11G1131700_novel23	MD11G1131700	Novel_lncRNA	682	1	{NA}	{NA}	{NA}	{NA}	{NA}	{XM_008387065.2; PREDICTED: Malus x domestica E3 SUMO-protein ligase SIZ1 (LOC103447861), transcript variant X1, mRNA}	{NA}	1570.46	1282.79	1582.54	2251.86	386.859	289.544	0.41803	0.46519	0.79374	FALSE	385.939	397.469	-0.042469	0.95365	1	FALSE	420.841	316.211	0.41239	0.3419	0.66458	FALSE	471.869	351.593	0.42448	0.51989	0.92952	FALSE	523.611	374.705	0.48274	0.35536	0.97406	FALSE	513.358	277.236	0.88885	0.071821
MD11G1136900_novel02	MD11G1136900	Novel_lncRNA	220	1	{NA}	{NA}	{NA}	{NA}	{NA}	{XM_008351533.2; PREDICTED: Malus x domestica CASP-like protein 5A2 (LOC103413036), mRNA}	{NA}	2582.59	458.107	920.657	2613.8	2.42025	8.3755	-1.791	0.13112	0.43524	FALSE	4.86814	2.48539	0.9699	0.46282	1	FALSE	5.31316	9.17969	-0.78888	0.42778	0.72661	FALSE	11.6035	2.19977	2.3991	0.037099	0.47573	FALSE	12.9372	4.74923	1.4458	0.16085	0.8353	FALSE	12.7176	8.03078	0.66321	0.53002
MD11G1140200_novel03	MD11G1140200	Novel_lncRNA	2783	3	{XP_018498277.1; PREDICTED: vicilin-like antimicrobial peptides 2-3 [Pyrus x bretschneideri]}	{NA}	{mdm:103453212; - - - - -}	{NA}	{NA}	{XR_001953030.1; PREDICTED: Pyrus x bretschneideri uncharacterized LOC103945305 (LOC103945305), transcript variant X7, misc_RNA}	{NA}	138.67	114.333	118.27	106.44	201.794	151.725	0.41143	0.46803	0.79435	FALSE	169.234	207.212	-0.29209	0.65656	1	FALSE	184.42	165.866	0.15298	0.68671	0.8944	FALSE	128.832	183.287	-0.50862	0.44488	0.90298	FALSE	142.496	164.634	-0.20834	0.66784	1	FALSE	139.306	145.383	-0.061611	0.94033
MD11G1141500_novel01	MD11G1141500	Novel_lncRNA	2010	1	{NA}	{NA}	{NA}	{NA}	{NA}	{XM_018647577.1; PREDICTED: Pyrus x bretschneideri SNF1-related protein kinase regulatory subunit beta-3-like (LOC103947689), transcript variant X3, mRNA}	{NA}	122.773	145.403	103.613	86.1667	193.711	93.2479	1.0548	0.22734	0.55552	FALSE	104.058	199.687	-0.94035	0.30695	1	FALSE	113.472	101.999	0.15378	0.71777	0.91398	FALSE	72.4063	176.606	-1.2863	0.16366	0.81275	FALSE	80.0347	101.238	-0.33906	0.50156	0.98512	FALSE	78.243	89.3709	-0.19184	0.71394
MD11G1144600_novel01	MD11G1144600	Novel_lncRNA	391	1	{NA}	{NA}	{NA}	{NA}	{NA}	{XM_008386927.2; PREDICTED: Malus x domestica histone H2A (LOC103447734), mRNA}	{NA}	5341.21	2487	3200.68	4472.31	249.921	320.15	-0.35728	0.48287	0.80349	FALSE	255.561	256.987	-0.0080296	0.98124	1	FALSE	278.536	349.831	-0.32879	0.41519	0.71664	FALSE	311.492	227.318	0.45448	0.43936	0.90298	FALSE	344.315	247.835	0.47435	0.30964	0.9543	FALSE	336.979	306.706	0.1358	0.7781
MD11G1157900_novel01	MD11G1157900	Novel_lncRNA	323	1	{NA}	{NA}	{NA}	{NA}	{NA}	{XM_017335413.1; PREDICTED: Malus x domestica probable ribosome biogenesis protein RLP24 (LOC103447989), transcript variant X2, mRNA}	{NA}	5721.49	2603.27	3401.54	3333.81	138.149	181.301	-0.39216	0.47424	0.79632	FALSE	149.504	142.026	0.07402	0.87019	1	FALSE	162.919	197.657	-0.27884	0.53086	0.80137	FALSE	127.36	125.648	0.019523	0.96237	1	FALSE	140.408	145.119	-0.047618	0.90787	1	FALSE	137.403	173.465	-0.33623	0.4412
MD11G1160200_novel01	MD11G1160200	Novel_lncRNA	2394	3	{XP_008342938.1; PREDICTED: 60S acidic ribosomal protein P2B-like [Malus domestica]}	{sp|P41099|RLA2_PARAR; 60S acidic ribosomal protein P2 OS=Parthenium argentatum PE=3 SV=1}	{rcu:8258893; K02943 RP-LP2, RPLP2 large subunit ribosomal protein LP2 - ko03010; Genetic Information Processing; Translation; Ribosome}	{NA}	{NA}	{XM_008344716.2; PREDICTED: Malus x domestica 60S acidic ribosomal protein P2B-like (LOC103405686), mRNA}	{NA}	796.993	360.887	466.117	573.1	534.492	734.035	-0.45768	0.39181	0.731	FALSE	559.668	549.122	0.027445	0.95028	1	FALSE	610.092	800.673	-0.39219	0.32942	0.64548	FALSE	585.952	485.779	0.27048	0.68707	0.96752	FALSE	647.445	543.459	0.25259	0.64705	1	FALSE	634.153	702.331	-0.14732	0.7126
MD11G1164900_novel02	MD11G1164900	Novel_lncRNA	2700	4	{NA}	{NA}	{NA}	{NA}	{NA}	{XR_001792010.1; PREDICTED: Malus x domestica uncharacterized LOC103453359 (LOC103453359), transcript variant X12, misc_RNA}	{NA}	278.82	186.773	248.7	159.01	310.198	294.394	0.075437	0.82172	0.98598	FALSE	341.918	317.853	0.10529	0.87071	1	FALSE	372.258	321.616	0.21097	0.5397	0.8064	FALSE	186.582	281.142	-0.59149	0.36408	0.88678	FALSE	206.577	332.873	-0.68829	0.16758	0.8425	FALSE	201.645	281.945	-0.4836	0.3559
MD11G1171800_novel01	MD11G1171800	Novel_lncRNA	309	1	{XP_008361158.1; PREDICTED: uncharacterized protein LOC103424841 [Malus domestica]}	{NA}	{pper:PRUPE_ppa013668mg; - - - - -}	{NA}	{GO:0008608; attachment of spindle microtubules to kinetochore; biological_process GO:0008134; transcription factor binding; molecular_function GO:0005840; ribosome; cellular_component GO:0005622; intracellular; cellular_component GO:0006412; translation; biological_process GO:0070840; dynein complex binding; molecular_function GO:0042803; protein homodimerization activity; molecular_function GO:…	{XM_009349185.2; PREDICTED: Pyrus x bretschneideri uncharacterized LOC103939126 (LOC103939126), mRNA}	{PF00831:Ribosomal L29 protein PF10473:Leucine-rich repeats of kinetochore protein Cenp-F/LEK1 PF00010:Helix-loop-helix DNA-binding domain PF08650:DASH complex subunit Dad4}	2059.93	1194.53	961.903	1629.36	55.1084	54.5866	0.013726	0.98543	1	FALSE	35.8736	56.6593	-0.65939	0.32565	1	FALSE	39.1317	59.5414	-0.60556	0.21966	0.5311	FALSE	52.8111	50.1041	0.075913	0.93024	1	FALSE	58.455	34.7936	0.74851	0.19287	0.8642	FALSE	57.3318	52.2449	0.13405	0.89012
MD11G1191800_novel01	MD11G1191800	Novel_lncRNA	258	1	{NA}	{NA}	{NA}	{NA}	{NA}	{XM_008387510.1; PREDICTED: Malus x domestica 40S ribosomal protein S2-4-like (LOC103448259), mRNA}	{NA}	9858.47	3287.04	5499.01	7273.65	54.3914	102.172	-0.90955	0.16728	0.48501	FALSE	82.4455	55.6845	0.56617	0.43571	1	FALSE	89.8321	111.42	-0.3107	0.50784	0.78921	FALSE	96.6076	49.2546	0.97188	0.17213	0.81275	FALSE	106.67	80.0325	0.4145	0.4297	0.98512	FALSE	104.469	97.7761	0.095515	0.88036
MD11G1197600_novel01	MD11G1197600	Novel_lncRNA	215	1	{NA}	{NA}	{NA}	{NA}	{NA}	{XM_008379031.2; PREDICTED: Malus x domestica polyadenylate-binding protein RBP47B' (LOC103440360), mRNA}	{NA}	0	0	0	0	0	0	NA	NA	NA	NA	0	0	NA	NA	NA	NA	0	0	NA	NA	NA	NA	0	0	NA	NA	NA	NA	0	0	NA	NA	NA	NA	0	0	NA	NA
MD11G1209000_novel01	MD11G1209000	Novel_lncRNA	261	1	{NA}	{NA}	{NA}	{NA}	{NA}	{XM_009345368.1; PREDICTED: Pyrus x bretschneideri NADH dehydrogenase [ubiquinone] 1 alpha subcomplex subunit 2-like (LOC103935598), mRNA}	{NA}	5534.59	1675.21	2481.61	4706.7	30.9753	63.2481	-1.0299	0.11239	0.39466	FALSE	40.054	31.7881	0.33346	0.66333	1	FALSE	43.6807	69.0602	-0.66086	0.17652	0.47455	FALSE	66.8322	28.1139	1.2493	0.073217	0.66005	FALSE	73.742	38.8419	0.92487	0.11736	0.72751	FALSE	72.2772	60.6004	0.25421	0.69024
MD11G1217800_novel02	MD11G1217800	Novel_lncRNA	336	2	{NA}	{NA}	{NA}	{NA}	{NA}	{XM_008351684.2; PREDICTED: Malus x domestica reactive Intermediate Deaminase A, chloroplastic-like (LOC103413198), mRNA}	{NA}	233.827	31.0533	145.717	162.18	1.69296	8.68905	-2.3596	0.066527	0.30917	FALSE	7.49123	1.73778	2.108	0.099932	1	FALSE	8.17139	9.46576	-0.21214	0.85048	0.97122	FALSE	7.09649	1.539	2.2051	0.10147	0.73696	FALSE	7.80641	7.26991	0.10272	0.96396	1	FALSE	7.63887	8.31492	-0.12234	0.94614
MD11G1245300_novel01	MD11G1245300	Novel_lncRNA	504	1	{NA}	{NA}	{NA}	{NA}	{NA}	{XM_008387947.2; PREDICTED: Malus x domestica DEAD-box ATP-dependent RNA helicase 42 (LOC103448675), transcript variant X2, mRNA}	{NA}	2207.62	3042.38	2148.72	1708.33	577.405	238.575	1.2751	0.086994	0.34753	FALSE	310.232	594.769	-0.93898	0.20382	1	FALSE	338.191	260.556	0.37624	0.37356	0.68549	FALSE	209.881	526.008	-1.3255	0.096164	0.7201	FALSE	231.774	301.395	-0.37894	0.46651	0.98512	FALSE	226.455	228.467	-0.012765	0.95945
MD11G1245600_novel03	MD11G1245600	Novel_lncRNA	1106	1	{NA}	{NA}	{NA}	{NA}	{NA}	{XM_017328882.1; PREDICTED: Malus x domestica probable splicing factor, arginine/serine-rich 7 (LOC103423060), mRNA}	{NA}	20.0267	10.9967	10.4267	15.5967	7.62401	7.34894	0.053014	0.94373	1	FALSE	5.3334	7.88576	-0.5642	0.89492	1	FALSE	5.81956	8.01508	-0.46181	0.72036	0.91453	FALSE	6.42326	6.97383	-0.11864	1	1	FALSE	7.11646	5.21287	0.44908	0.76529	1	FALSE	6.9727	7.03247	-0.012315	1
MD11G1246800_novel01	MD11G1246800	Novel_lncRNA	1256	1	{AFP54303.1; metallothionein-like protein [Pyrus x bretschneideri]}	{sp|O24059|MT3_MALDO; Metallothionein-like protein type 3 OS=Malus domestica GN=MT2 PE=3 SV=1}	{pxb:103947618; - - - - -}	{NA}	{GO:0046872; metal ion binding; molecular_function}	{XM_008387954.2; PREDICTED: Malus x domestica cytochrome c oxidase copper chaperone 2 (LOC103448680), transcript variant X2, mRNA}	{PF01439:Metallothionein}	1966.42	603.37	1589.08	2550.34	402.178	847.373	-1.0752	0.045122	0.24599	FALSE	856.78	413.423	1.0513	0.21071	1	FALSE	932.439	926.513	0.0091983	0.96154	1	FALSE	1204.71	365.876	1.7193	0.14727	0.80119	FALSE	1321.1	829.184	0.67198	0.48754	0.98512	FALSE	1291.13	811.546	0.66989	0.46504
MD11G1246800_novel02	MD11G1246800	Novel_lncRNA	1105	2	{AFP54303.1; metallothionein-like protein [Pyrus x bretschneideri]}	{sp|O24059|MT3_MALDO; Metallothionein-like protein type 3 OS=Malus domestica GN=MT2 PE=3 SV=1}	{pxb:103947618; - - - - -}	{NA}	{NA}	{XR_528762.1; PREDICTED: Malus x domestica uncharacterized LOC103430589 (LOC103430589), ncRNA}	{NA}	7235.53	1939.93	5279.24	6827.92	1095.18	2647.72	-1.2736	0.021407	0.15429	FALSE	2399.33	1125.15	1.0925	0.26611	1	FALSE	2609.87	2895.68	-0.14992	0.78416	0.94079	FALSE	2739.26	995.71	1.46	0.25053	0.85748	FALSE	3001.95	2321.49	0.37085	0.72384	1	FALSE	2934.42	2536.12	0.21045	0.82516
MD11G1251000_novel03	MD11G1251000	Novel_lncRNA	1453	8	{XP_017183436.1; PREDICTED: uncharacterized protein LOC103419791 isoform X1 [Malus domestica]}	{NA}	{mdm:103445068; - - - - -}	{NA}	{NA}	{XR_001788123.1; PREDICTED: Malus x domestica uncharacterized LOC103419791 (LOC103419791), transcript variant X4, misc_RNA}	{NA}	362.793	413.377	704.57	325.743	331.73	187.117	0.82607	0.11719	0.4046	FALSE	473.954	339.949	0.47943	0.44804	1	FALSE	516.296	204.307	1.3375	0.0015259	0.018766	TRUE	187.669	300.727	-0.68027	0.31489	0.86303	FALSE	207.503	460.68	-1.1506	0.026744	0.5962	FALSE	202.258	179.112	0.17534	0.62219
MD11G1251000_novel07	MD11G1251000	Novel_lncRNA	1459	3	{XP_008356107.1; PREDICTED: uncharacterized protein LOC103419791 isoform X2 [Malus domestica]}	{NA}	{NA}	{NA}	{NA}	{XR_001791406.1; PREDICTED: Malus x domestica uncharacterized LOC103448704 (LOC103448704), transcript variant X5, ncRNA}	{NA}	364.27	434.163	661.61	259.18	355.339	188.635	0.9136	0.085136	0.34646	FALSE	448.308	363.865	0.30109	0.67321	1	FALSE	488.463	206.303	1.2435	0.003597	0.03358	TRUE	149.576	321.818	-1.1054	0.12827	0.78374	FALSE	165.244	435.703	-1.3987	0.009257	0.45466	FALSE	160.661	180.664	-0.16929	0.98744
MD11G1255300_novel20	MD11G1255300	Novel_lncRNA	2115	1	{NA}	{NA}	{NA}	{NA}	{NA}	{XR_001787303.1; PREDICTED: Malus x domestica uncharacterized LOC108170829 (LOC108170829), ncRNA}	{NA}	24.47	10.2867	12.59	6.49333	14.622	19.7001	-0.43007	0.50924	0.81624	FALSE	13.6491	15.0686	-0.14274	1	1	FALSE	14.8835	21.4889	-0.52988	0.51714	0.7938	FALSE	5.87316	13.3258	-1.182	0.23198	0.85576	FALSE	6.53122	13.3134	-1.0275	0.19603	0.87214	FALSE	6.41126	18.8596	-1.5566	0.03825
MD11G1255300_novel21	MD11G1255300	Novel_lncRNA	1647	1	{NA}	{NA}	{NA}	{NA}	{NA}	{XR_001787303.1; PREDICTED: Malus x domestica uncharacterized LOC108170829 (LOC108170829), ncRNA}	{NA}	0	0	0	3.19	0	0	NA	NA	NA	NA	0	0	NA	NA	NA	NA	0	0	NA	NA	NA	NA	2.04152	0	Inf	0.40318	0.89416	FALSE	2.22029	0	Inf	0.36942	0.97671	FALSE	2.16907	0	Inf	0.36983
MD11G1259800_novel01	MD11G1259800	Novel_lncRNA	3053	1	{NA}	{NA}	{NA}	{NA}	{NA}	{XR_001791512.1; PREDICTED: Malus x domestica UBP1-associated protein 2C-like (LOC103448753), misc_RNA}	{NA}	610.687	307.457	332.083	334.987	607.806	736.283	-0.27665	0.54972	0.85571	FALSE	516.313	625.262	-0.27622	0.72444	1	FALSE	562.152	804.215	-0.51662	0.22342	0.53713	FALSE	448.356	553.136	-0.30299	0.67801	0.96114	FALSE	495.808	501.779	-0.017273	0.92374	1	FALSE	485.3	704.94	-0.53862	0.25078
MD11G1259900_novel04	MD11G1259900	Novel_lncRNA	389	1	{NA}	{NA}	{NA}	{NA}	{NA}	{XR_001791512.1; PREDICTED: Malus x domestica UBP1-associated protein 2C-like (LOC103448753), misc_RNA}	{NA}	7.74667	55.6833	70.9467	35.56	4.62327	0.571016	3.0173	0.14083	0.44551	FALSE	5.33839	4.73493	0.17306	0.95694	1	FALSE	5.80201	0.629765	3.2037	0.027298	0.14608	FALSE	2.49185	4.19126	-0.75016	0.78892	1	FALSE	2.74645	5.19617	-0.91988	0.63096	1	FALSE	2.65439	0.548287	2.2754	0.47369
MD11G1277500_novel03	MD11G1277500	Novel_lncRNA	276	1	{XP_008350042.1; PREDICTED: 2-methyl-6-phytyl-1,4-hydroquinone methyltransferase, chloroplastic-like [Malus domestica]}	{sp|Q2QM69|BQMT2_ORYSJ; 2-methyl-6-phytyl-1,4-hydroquinone methyltransferase 2, chloroplastic OS=Oryza sativa subsp. japonica GN=Os12g0615400 PE=2 SV=2}	{pper:PRUPE_ppa008168mg; K12502 VTE3, APG1 MPBQ/MSBQ methyltransferase 2.1.1.295 ko00130; Metabolism; Metabolism of cofactors and vitamins; Ubiquinone and other terpenoid-quinone biosynthesis}	{At3g63410; KOG1540 Ubiquinone biosynthesis methyltransferase COQ5 H Coenzyme transport and metabolism ;}	{NA}	{XM_008351821.2; PREDICTED: Malus x domestica 2-methyl-6-phytyl-1,4-hydroquinone methyltransferase, chloroplastic-like (LOC103413350), transcript variant X2, mRNA}	{NA}	0	28.1	30.26	18.02	0.862492	0	Inf	0.65114	0.90463	FALSE	0.65199	0.895275	-0.45748	1	1	FALSE	0.712444	0	Inf	0.56621	0.82301	FALSE	0.340254	0.79172	-1.2184	1	1	FALSE	0.370048	0.628714	-0.76469	1	1	FALSE	0.361511	0	Inf	0.9125
MD11G1281200_novel01	MD11G1281200	Novel_lncRNA	1434	2	{XP_017187743.1; PREDICTED: villin-4-like [Malus domestica]}	{NA}	{NA}	{NA}	{NA}	{XR_001791301.1; PREDICTED: Malus x domestica uncharacterized LOC103448971 (LOC103448971), transcript variant X3, ncRNA}	{NA}	1158	349.877	635.017	683.187	264.403	588.381	-1.154	0.042506	0.23415	FALSE	419.02	271.42	0.62649	0.29567	1	FALSE	456.411	642.209	-0.49271	0.24539	0.55945	FALSE	385.917	240.237	0.68383	0.30186	0.86303	FALSE	426.246	407.147	0.066135	0.92717	1	FALSE	417.125	563.177	-0.43311	0.3509
MD11G1281300_novel01	MD11G1281300	Novel_lncRNA	1164	1	{NA}	{NA}	{NA}	{NA}	{NA}	{XR_525876.2; PREDICTED: Malus x domestica uncharacterized LOC103413363 (LOC103413363), ncRNA}	{NA}	158.933	46.5533	64.24	87.3767	28.6506	62.2936	-1.1205	0.089747	0.35282	FALSE	33.1446	29.3756	0.17415	0.8778	1	FALSE	36.1532	67.9758	-0.9109	0.067501	0.27682	FALSE	38.0122	25.986	0.54873	0.45297	0.90355	FALSE	41.9244	32.1762	0.3818	0.48203	0.98512	FALSE	40.9911	59.6228	-0.54055	0.29788
MD11G1282700_novel08	MD11G1282700	Novel_lncRNA	282	1	{NA}	{NA}	{NA}	{NA}	{NA}	{XM_008388248.2; PREDICTED: Malus x domestica protein MARD1-like (LOC103448977), transcript variant X4, mRNA}	{NA}	20528.5	6244.88	12787.7	8916.26	173.091	357.247	-1.0454	0.056574	0.27702	FALSE	294.386	178.19	0.72429	0.46853	1	FALSE	320.354	390.429	-0.28539	0.60454	0.85143	FALSE	189.353	157.765	0.2633	0.74911	0.9997	FALSE	207.511	284.715	-0.45633	0.68955	1	FALSE	202.509	342.311	-0.75732	0.19058
MD11G1298900	MD11G1298900	Novel_lncRNA	729	2	{NA}	{NA}	{NA}	{NA}	{NA}	{XM_008388391.2; PREDICTED: Malus x domestica glycine-rich protein DOT1-like (LOC103449110), mRNA}	{NA}	6898.85	3759.7	4422.53	5158.75	1290.42	1413.62	-0.13155	0.74833	0.95446	FALSE	1180.37	1327.14	-0.16907	0.82568	1	FALSE	1286.2	1544.5	-0.26402	0.505	0.78768	FALSE	1183.69	1173.86	0.012027	0.94899	1	FALSE	1307	1145.64	0.1901	0.72868	1	FALSE	1279.4	1353.95	-0.081708	0.84605
MD11G1305900_novel01	MD11G1305900	Novel_lncRNA	222	2	{NA}	{NA}	{NA}	{NA}	{NA}	{XM_008388439.2; PREDICTED: Malus x domestica probable U6 snRNA-associated Sm-like protein LSm4 (LOC103449152), mRNA}	{NA}	11744.8	3357.89	4434.97	4378.83	19.7553	42.1168	-1.0922	0.093997	0.35909	FALSE	23.7533	20.3153	0.22556	0.71765	1	FALSE	25.8871	46.0127	-0.8298	0.14396	0.42425	FALSE	20.837	17.9696	0.21359	0.76958	1	FALSE	23.0197	23.0814	-0.003862	0.99111	1	FALSE	22.5356	40.3428	-0.8401	0.13487
MD11G1307000_novel106	MD11G1307000	Novel_lncRNA	298	2	{NA}	{NA}	{NA}	{NA}	{NA}	{XM_008388452.2; PREDICTED: Malus x domestica sucrose synthase 3 (SS), transcript variant X1, mRNA}	{NA}	266.107	949.753	834.603	877.68	36.3404	6.14428	2.5643	0.0007267	0.014979	TRUE	27.7365	37.2385	-0.42501	0.50266	1	FALSE	30.2739	6.71824	2.1719	0.0028349	0.02855	TRUE	24.6432	32.9207	-0.41781	0.52734	0.93142	FALSE	27.4117	26.9768	0.023071	1	1	FALSE	26.8536	5.89126	2.1885	0.0063121
MD11G1307000_novel107	MD11G1307000	Novel_lncRNA	219	1	{NA}	{NA}	{NA}	{NA}	{NA}	{XM_008388452.2; PREDICTED: Malus x domestica sucrose synthase 3 (SS), transcript variant X1, mRNA}	{NA}	0	0	0	0	0	0	NA	NA	NA	NA	0	0	NA	NA	NA	NA	0	0	NA	NA	NA	NA	0	0	NA	NA	NA	NA	0	0	NA	NA	NA	NA	0	0	NA	NA
MD11G1311200_novel01	MD11G1311200	Novel_lncRNA	1867	1	{XP_008386704.1; PREDICTED: uncharacterized protein LOC108169220 [Malus domestica]}	{NA}	{mdm:108169220; - - - - -}	{NA}	{NA}	{XM_017326286.1; PREDICTED: Malus x domestica uncharacterized LOC103413406 (LOC103413406), mRNA}	{NA}	1564.33	796.177	765.57	1030.14	928.931	1089.09	-0.22948	0.60947	0.87812	FALSE	691.994	955.806	-0.46596	0.47212	1	FALSE	754.3	1188.42	-0.65584	0.10577	0.35593	FALSE	794.581	845.427	-0.089485	0.93267	1	FALSE	877.995	671.824	0.38613	0.46145	0.98512	FALSE	859.757	1042.56	-0.27813	0.55234
MD11G1312100_novel01	MD11G1312100	Novel_lncRNA	1755	3	{XP_008350059.1; PREDICTED: uncharacterized protein LOC103413369 [Malus domestica]}	{NA}	{mdm:103449191; - - - - -}	{NA}	{NA}	{XR_001788340.1; PREDICTED: Malus x domestica uncharacterized LOC103421507 (LOC103421507), transcript variant X3, ncRNA}	{NA}	328.647	173.127	146.86	188.557	192.869	212.983	-0.14312	0.68283	0.9254	FALSE	123.965	198.713	-0.68075	0.31995	1	FALSE	135.179	232.578	-0.78284	0.069862	0.28052	FALSE	135.642	175.762	-0.37381	0.6424	0.95614	FALSE	149.856	120.303	0.31691	0.50126	0.98512	FALSE	146.677	203.944	-0.47553	0.27422
MD11G1313700_novel01	MD11G1313700	Novel_lncRNA	245	1	{NA}	{NA}	{NA}	{NA}	{NA}	{XM_008388485.2; PREDICTED: Malus x domestica uncharacterized LOC103449194 (LOC103449194), mRNA}	{NA}	676.553	265.61	276.767	284.073	3.49996	4.74467	-0.43897	0.6636	0.91314	FALSE	3.07321	3.61651	-0.23485	1	1	FALSE	3.35617	5.19031	-0.629	0.55662	0.81642	FALSE	2.72567	3.19977	-0.23136	1	1	FALSE	2.98546	2.9785	0.0033665	1	1	FALSE	2.92052	4.54086	-0.63674	0.60216
MD12G1007200_novel03	MD12G1007200	Novel_lncRNA	349	1	{NA}	{NA}	{NA}	{NA}	{NA}	{XM_008351910.2; PREDICTED: Malus x domestica binding partner of ACD11 1-like (LOC103413447), mRNA}	{NA}	3410.46	3508.77	5048.64	4805.21	244.72	144.192	0.76314	0.15643	0.46982	FALSE	292.983	250.785	0.22437	0.74023	1	FALSE	319.21	157.667	1.0176	0.018147	0.11052	FALSE	242.27	221.774	0.12752	0.91024	1	FALSE	268.568	284.755	-0.084437	0.79864	1	FALSE	263.098	138.157	0.92929	0.044597
MD12G1009100_novel07	MD12G1009100	Novel_lncRNA	220	1	{XP_008386862.1; PREDICTED: plant cysteine oxidase 2-like [Malus domestica]}	{NA}	{mdm:103449336; K10712 ADO cysteamine dioxygenase 1.13.11.19 ko00430; Metabolism; Metabolism of other amino acids; Taurine and hypotaurine metabolism}	{NA}	{NA}	{XM_008388640.2; PREDICTED: Malus x domestica plant cysteine oxidase 2-like (LOC103449336), mRNA}	{NA}	291.517	5821.58	2158.73	5456.12	32.856	0.879619	5.2231	0.0018541	0.027553	TRUE	11.1706	33.8446	-1.5992	0.14855	1	FALSE	12.2234	0.96363	3.665	0.013787	0.090428	FALSE	24.026	29.9257	-0.31678	0.80363	1	FALSE	26.7364	10.8383	1.3027	0.086354	0.67994	FALSE	26.1971	0.842084	4.9593	5.6578e-05
MD12G1009100_novel08	MD12G1009100	Novel_lncRNA	253	1	{NA}	{NA}	{NA}	{NA}	{NA}	{XM_008388640.2; PREDICTED: Malus x domestica plant cysteine oxidase 2-like (LOC103449336), mRNA}	{NA}	768.26	7302.89	4703.32	9518.64	115.118	6.97927	4.0439	0.00076764	0.015093	TRUE	67.8734	118.278	-0.80126	0.33562	1	FALSE	74.2674	7.62393	3.2841	0.011821	0.082426	FALSE	113.725	104.562	0.12119	0.95855	1	FALSE	127.11	65.889	0.94796	0.40858	0.98512	FALSE	125.119	6.68238	4.2268	0.010391
MD12G1018700_novel05	MD12G1018700	Novel_lncRNA	1194	1	{NA}	{NA}	{NA}	{NA}	{NA}	{XM_008388721.2; PREDICTED: Malus x domestica fructose-bisphosphate aldolase, cytoplasmic isozyme-like (LOC103449400), mRNA}	{NA}	247.977	1261.8	642.83	240.957	859.443	100.924	3.0901	1.44e-07	1.1502e-05	TRUE	352.906	881.699	-1.321	0.024604	1	FALSE	385.061	110.427	1.802	0.013905	0.09074	FALSE	109.316	779.609	-2.8342	4.8335e-05	0.0076906	TRUE	121.071	343.766	-1.5056	0.070814	0.64828	FALSE	118.018	96.7518	0.28665	0.59071
MD12G1032300_novel01	MD12G1032300	Novel_lncRNA	244	1	{NA}	{NA}	{NA}	{NA}	{GO:0003723; RNA binding; molecular_function GO:0008270; zinc ion binding; molecular_function}	{XM_008388826.2; PREDICTED: Malus x domestica uncharacterized protein At5g41620-like (LOC103449502), mRNA}	{PF03854:P-11 zinc finger}	1320.69	349.937	331.203	1003.21	3.95362	9.76845	-1.305	0.2568	0.59564	FALSE	3.68528	4.04475	-0.13428	0.95514	1	FALSE	4.01697	10.688	-1.4118	0.15738	0.4483	FALSE	9.43308	3.57795	1.3986	0.23177	0.85576	FALSE	10.4572	3.59434	1.5407	0.13937	0.78839	FALSE	10.245	9.36686	0.12928	0.94075
MD12G1036100_novel01	MD12G1036100	Novel_lncRNA	208	1	{NA}	{NA}	{NA}	{NA}	{NA}	{XM_009338667.2; PREDICTED: Pyrus x bretschneideri 60S ribosomal protein L10a-like (LOC103929462), mRNA}	{NA}	9350.12	2221.86	3135.65	4827.9	6.99032	19.3684	-1.4703	0.10033	0.37274	FALSE	9.76608	7.16086	0.44765	0.7294	1	FALSE	10.652	21.136	-0.98858	0.18443	0.49142	FALSE	13.3857	6.33742	1.0787	0.2819	0.86303	FALSE	14.743	9.4888	0.63573	0.44027	0.98512	FALSE	14.4216	18.5462	-0.3629	0.62502
MD12G1065300_novel01	MD12G1065300	Novel_lncRNA	1016	8	{XP_009359025.1; PREDICTED: K(+) efflux antiporter 6-like [Pyrus x bretschneideri]}	{NA}	{pxb:103949642; - - - - -}	{NA}	{NA}	{XR_529630.2; PREDICTED: Malus x domestica chaperone protein dnaJ 6-like (LOC103437062), transcript variant X2, misc_RNA}	{NA}	398.53	650.113	584.533	285.003	362.519	130.907	1.4695	0.012866	0.10977	FALSE	255.764	372.811	-0.54363	0.41895	1	FALSE	278.881	143.267	0.96094	0.027533	0.14673	FALSE	104.357	329.716	-1.6597	0.017772	0.34606	FALSE	115.262	248.83	-1.1102	0.031293	0.5962	FALSE	112.322	125.456	-0.15955	0.9115
MD12G1066000_novel02	MD12G1066000	Novel_lncRNA	2677	3	{NA}	{NA}	{NA}	{NA}	{NA}	{XR_001787507.1; PREDICTED: Malus x domestica uncharacterized LOC108171079 (LOC108171079), ncRNA}	{NA}	74.22	34.2433	29.6133	28.0233	54.0575	77.2372	-0.5148	0.55844	0.86194	FALSE	40.8345	55.1813	-0.43439	0.4838	1	FALSE	44.5217	84.4531	-0.92364	0.056408	0.24456	FALSE	32.7083	48.8026	-0.5773	0.54472	0.9346	FALSE	36.2773	39.7189	-0.13076	0.96215	1	FALSE	35.3786	73.9575	-1.0638	0.11191
MD12G1074400_novel02	MD12G1074400	Novel_lncRNA	3116	1	{NA}	{NA}	{NA}	{NA}	{NA}	{XM_008389078.2; PREDICTED: Malus x domestica villin-3 (LOC103449750), mRNA}	{NA}	48.3633	21.4033	35.2567	36.1733	44.1972	59.711	-0.43404	0.46651	0.79435	FALSE	57.5311	45.3949	0.34181	0.56401	1	FALSE	62.7357	65.2774	-0.057298	0.92792	1	FALSE	49.4768	40.1449	0.30153	0.58075	0.94193	FALSE	54.7002	55.9611	-0.032878	0.99823	1	FALSE	53.415	57.1981	-0.098722	0.93025
MD12G1078100_novel01	MD12G1078100	Novel_lncRNA	1119	7	{XP_009374132.1; PREDICTED: calcium-dependent protein kinase 32-like [Pyrus x bretschneideri]}	{sp|Q38873|CDPK7_ARATH; Calcium-dependent protein kinase 7 OS=Arabidopsis thaliana GN=CPK7 PE=2 SV=1}	{mdm:103449720; K13412 CPK calcium-dependent protein kinase 2.7.11.1 ko04626; Organismal Systems; Environmental adaptation; Plant-pathogen interaction | ko05145; Human Diseases; Infectious diseases: Parasitic; Toxoplasmosis}	{At5g19450; KOG0032 Ca2+/calmodulin-dependent protein kinase, EF-Hand protein superfamily T Signal transduction mechanisms ;}	{NA}	{XR_001791607.1; PREDICTED: Malus x domestica uncharacterized LOC103449743 (LOC103449743), transcript variant X2, ncRNA}	{NA}	558.09	398.127	611.787	486.193	238.724	208.052	0.1984	0.68443	0.9256	FALSE	293.866	244.736	0.26393	0.68724	1	FALSE	319.988	227.406	0.49275	0.2448	0.5591	FALSE	203.233	216.453	-0.090917	0.86741	1	FALSE	225.151	285.356	-0.34187	0.47428	0.98512	FALSE	220.247	199.279	0.14434	0.73753
MD12G1085200_novel07	MD12G1085200	Novel_lncRNA	1522	7	{ONI08724.1; hypothetical protein PRUPE_5G197100 [Prunus persica]}	{NA}	{mdm:103455373; K19041 RNF38_44 E3 ubiquitin-protein ligase RNF38/44 2.3.2.27 -}	{NA}	{NA}	{XR_001788900.1; PREDICTED: Malus x domestica uncharacterized LOC103426454 (LOC103426454), transcript variant X2, ncRNA}	{NA}	22.6567	13.0833	15.6167	6.38667	11.4611	12.5179	-0.12725	0.84374	0.98974	FALSE	10.4134	11.8417	-0.18544	1	1	FALSE	11.3121	13.6463	-0.27064	0.84085	0.96769	FALSE	3.97447	10.4837	-1.3993	0.33195	0.87353	FALSE	4.43617	10.0996	-1.1869	0.27172	0.93234	FALSE	4.34711	11.9907	-1.4638	0.12882
MD12G1085200_novel08	MD12G1085200	Novel_lncRNA	2669	6	{XP_008242552.1; PREDICTED: sugar transport protein 14 [Prunus mume]}	{sp|Q8GW61|STP14_ARATH; Sugar transport protein 14 OS=Arabidopsis thaliana GN=STP14 PE=2 SV=2}	{pper:PRUPE_ppa004344mg; - - - - -}	{At1g77210; KOG0254 Predicted transporter (major facilitator superfamily) R General function prediction only ;}	{NA}	{XR_001788900.1; PREDICTED: Malus x domestica uncharacterized LOC103426454 (LOC103426454), transcript variant X2, ncRNA}	{NA}	52.5067	39.6133	28.6867	25.2933	66.5185	55.5014	0.26123	0.70462	0.93316	FALSE	38.7399	68.4825	-0.82192	0.22286	1	FALSE	42.2298	60.5201	-0.51915	0.35273	0.66999	FALSE	29.1954	60.5947	-1.0535	0.11889	0.77959	FALSE	32.2254	37.5619	-0.22107	0.68022	1	FALSE	31.582	53.1619	-0.75129	0.23066
MD12G1085200_novel09	MD12G1085200	Novel_lncRNA	2273	4	{XP_007209739.1; hypothetical protein PRUPE_ppa012942mg [Prunus persica]}	{sp|Q8GW61|STP14_ARATH; Sugar transport protein 14 OS=Arabidopsis thaliana GN=STP14 PE=2 SV=2}	{pper:PRUPE_ppa004344mg; - - - - -}	{At1g77210; KOG0254 Predicted transporter (major facilitator superfamily) R General function prediction only ;}	{NA}	{XR_001788900.1; PREDICTED: Malus x domestica uncharacterized LOC103426454 (LOC103426454), transcript variant X2, ncRNA}	{NA}	37.3767	34.4867	79.3233	40.63	47.1332	32.6271	0.53067	0.36092	0.69941	FALSE	90.7082	48.1762	0.91291	0.18518	1	FALSE	98.8621	35.6952	1.4697	0.0026051	0.027089	TRUE	39.543	42.6016	-0.10748	0.81038	1	FALSE	43.8571	88.2554	-1.0089	0.051863	0.635	FALSE	42.8738	31.2461	0.45642	0.39516
MD12G1096000_novel03	MD12G1096000	Novel_lncRNA	424	1	{NA}	{NA}	{NA}	{NA}	{NA}	{XM_009346870.2; PREDICTED: Pyrus x bretschneideri pentatricopeptide repeat-containing protein At1g80270, mitochondrial-like (LOC103936978), mRNA}	{NA}	191.127	41.55	36.17	47.4233	4.73286	14.0278	-1.5675	0.089998	0.35282	FALSE	3.25028	4.87793	-0.58571	0.75948	1	FALSE	3.52748	15.3048	-2.1173	0.019481	0.11698	FALSE	4.03057	4.31917	-0.09977	1	1	FALSE	4.45091	3.14234	0.50226	0.75082	1	FALSE	4.35684	13.4237	-1.6234	0.062073
MD12G1099500_novel01	MD12G1099500	Novel_lncRNA	1323	4	{NA}	{NA}	{NA}	{NA}	{NA}	{XR_530422.2; PREDICTED: Malus x domestica uncharacterized LOC103442688 (LOC103442688), ncRNA}	{NA}	47.0633	104.927	44.29	48.6533	89.2384	21.6111	2.0459	0.216	0.53893	FALSE	27.1973	92.1804	-1.761	0.29846	1	FALSE	29.6292	23.6446	0.32551	0.56309	0.82301	FALSE	24.9543	81.5196	-1.7079	0.2789	0.86303	FALSE	27.5811	26.5133	0.056965	1	1	FALSE	26.9877	20.7007	0.38262	0.56865
MD12G1108700_novel04	MD12G1108700	Novel_lncRNA	227	1	{NA}	{NA}	{NA}	{NA}	{NA}	{XM_008389311.2; PREDICTED: Malus x domestica ACT domain-containing protein ACR10 (LOC103449993), mRNA}	{NA}	355.42	984.693	724.203	2045.86	6.35073	1.54967	2.035	0.14638	0.45165	FALSE	4.63	6.4733	-0.48349	0.53531	1	FALSE	5.05571	1.68897	1.5818	0.24262	0.5591	FALSE	11.5177	5.72102	1.0095	0.34197	0.87353	FALSE	12.7437	4.48484	1.5067	0.07626	0.66977	FALSE	12.4429	1.48331	3.0684	0.0021062
MD12G1118400_novel01	MD12G1118400	Novel_lncRNA	292	2	{NA}	{NA}	{NA}	{NA}	{NA}	{XM_008361428.2; PREDICTED: Malus x domestica ubiquitin-like protein 5 (LOC103423357), mRNA}	{NA}	26489.4	6663.62	11041.1	23982.5	229.533	546.019	-1.2503	0.025058	0.17125	FALSE	317.155	235.742	0.42798	0.50184	1	FALSE	345.928	596.053	-0.78497	0.047035	0.2166	FALSE	607.95	208.51	1.5438	0.019358	0.34606	FALSE	671.988	307.193	1.1293	0.022554	0.58778	FALSE	658.671	522.875	0.33309	0.54911
MD12G1120500_novel02	MD12G1120500	Novel_lncRNA	1656	3	{NA}	{NA}	{NA}	{NA}	{NA}	{XM_017336448.1; PREDICTED: Malus x domestica probable E3 ubiquitin-protein ligase RHG1A (LOC103450065), transcript variant X1, mRNA}	{NA}	756.883	584.247	450.43	524.717	621.63	458.995	0.43758	0.5869	0.87419	FALSE	354.515	640.594	-0.85357	0.31073	1	FALSE	386.315	501.321	-0.37596	0.38165	0.69285	FALSE	355.368	566.529	-0.67284	0.39779	0.89144	FALSE	394.23	344.417	0.19488	0.73874	1	FALSE	386.274	439.634	-0.18668	0.65105
MD12G1120500_novel05	MD12G1120500	Novel_lncRNA	2282	2	{NA}	{NA}	{NA}	{NA}	{NA}	{XM_017336448.1; PREDICTED: Malus x domestica probable E3 ubiquitin-protein ligase RHG1A (LOC103450065), transcript variant X1, mRNA}	{NA}	94.5933	61.3333	27.7133	58.0533	103.927	82.6668	0.33019	0.93232	1	FALSE	29.4356	107.49	-1.8686	0.43017	1	FALSE	31.9446	90.2254	-1.498	0.0072346	0.059054	FALSE	56.6931	95.0433	-0.74541	0.78734	1	FALSE	62.7815	28.5268	1.138	0.26008	0.92214	FALSE	61.1878	79.1107	-0.37063	0.66685
MD12G1120500_novel08	MD12G1120500	Novel_lncRNA	2476	1	{NA}	{NA}	{NA}	{NA}	{NA}	{XM_017336448.1; PREDICTED: Malus x domestica probable E3 ubiquitin-protein ligase RHG1A (LOC103450065), transcript variant X1, mRNA}	{NA}	149.413	269.763	135.003	91.9267	473.458	143.483	1.7224	0.23416	0.56145	FALSE	170.393	488.86	-1.5206	0.29917	1	FALSE	185.795	156.86	0.24423	0.56741	0.82301	FALSE	97.3097	432.318	-2.1514	0.17226	0.81275	FALSE	107.265	165.63	-0.62678	0.19927	0.87214	FALSE	104.833	137.506	-0.3914	0.41415
MD12G1128000_novel01	MD12G1128000	Novel_lncRNA	825	3	{XP_009379402.1; PREDICTED: DNA-(apurinic or apyrimidinic site) lyase 2 [Pyrus x bretschneideri]}	{sp|F4JNY0|APE2_ARATH; DNA-(apurinic or apyrimidinic site) lyase 2 OS=Arabidopsis thaliana GN=APE2 PE=1 SV=1}	{pper:PRUPE_ppa024373mg; K10772 APEX2 AP endonuclease 2 4.2.99.18 ko03410; Genetic Information Processing; Replication and repair; Base excision repair}	{At4g36050; KOG1294 Apurinic/apyrimidinic endonuclease and related enzymes L Replication, recombination and repair ;}	{NA}	{XM_009340376.2; PREDICTED: Pyrus x bretschneideri UPF0183 protein At3g51130-like (LOC103930970), mRNA}	{NA}	463.867	90.5967	114.75	94.9433	32.9089	114.706	-1.8014	0.0039518	0.045912	TRUE	37.2615	33.8094	0.14026	0.83787	1	FALSE	40.5812	125.36	-1.6272	0.00094844	0.01333	TRUE	25.9605	29.9308	-0.20531	0.8157	1	FALSE	28.591	36.2685	-0.34316	0.53824	1	FALSE	27.9585	109.916	-1.975	6.7212e-05
MD12G1141500_novel03	MD12G1141500	Novel_lncRNA	1533	1	{O24058.1; RecName: Full=Metallothionein-like protein type 2 [Malus domestica]}	{sp|O24058|MT2_MALDO; Metallothionein-like protein type 2 OS=Malus domestica GN=MT1 PE=3 SV=1}	{pper:PRUPE_ppa014212mg; - - - - -}	{NA}	{NA}	{KC222014.1; Malus x domestica cultivar Red Fuji metallothionein type 2 (MT2) mRNA, complete cds}	{NA}	21779.9	5376.62	11530.1	12390.5	4514.11	12025.2	-1.4136	0.020587	0.15208	FALSE	7959.59	4642.15	0.7779	0.32619	1	FALSE	8665.55	13141.1	-0.60073	0.17194	0.46789	FALSE	7554.63	4108.83	0.87863	0.19997	0.83251	FALSE	8330.75	7702.83	0.11306	0.85805	1	FALSE	8156.56	11518.6	-0.49794	0.42958
MD12G1180300_novel05	MD12G1180300	Novel_lncRNA	1633	3	{XP_008372906.1; PREDICTED: 26S proteasome non-ATPase regulatory subunit 4 homolog isoform X1 [Malus domestica]}	{sp|P55034|PSMD4_ARATH; 26S proteasome non-ATPase regulatory subunit 4 homolog OS=Arabidopsis thaliana GN=RPN10 PE=1 SV=1}	{fve:101310273; K03029 PSMD4, RPN10 26S proteasome regulatory subunit N10 - ko03050; Genetic Information Processing; Folding, sorting and degradation; Proteasome | ko05169; Human Diseases; Infectious diseases: Viral; Epstein-Barr virus infection}	{At4g38630; KOG2884 26S proteasome regulatory complex, subunit RPN10/PSMD4 O Posttranslational modification, protein turnover, chaperones ;}	{NA}	{XR_001789431.1; PREDICTED: Malus x domestica uncharacterized LOC108172855 (LOC108172855), transcript variant X2, ncRNA}	{NA}	146.247	64.6167	90.7567	100.26	61.6989	86.9315	-0.49463	0.41958	0.75312	FALSE	70.9126	63.3398	0.16293	0.77506	1	FALSE	77.2662	94.8939	-0.29648	0.56684	0.82301	FALSE	66.4048	56.0287	0.24512	0.68411	0.96549	FALSE	73.4785	68.9851	0.091039	0.86304	1	FALSE	71.8405	83.2188	-0.21211	0.69194
MD12G1193500_novel01	MD12G1193500	Novel_lncRNA	410	2	{NA}	{NA}	{NA}	{NA}	{NA}	{XM_009339540.2; PREDICTED: Pyrus x bretschneideri NADH dehydrogenase [ubiquinone] 1 alpha subcomplex subunit 1 (LOC103930242), mRNA}	{NA}	2485.67	806.713	1059.11	1541.12	85.6112	169.395	-0.98452	0.1019	0.37529	FALSE	95.5821	87.8564	0.12159	0.89807	1	FALSE	104.158	184.969	-0.82851	0.06314	0.26461	FALSE	120.595	77.7415	0.63341	0.33861	0.87353	FALSE	133.048	92.7236	0.52094	0.27233	0.93234	FALSE	130.173	162.256	-0.31784	0.48097
MD12G1199300_novel07	MD12G1199300	Novel_lncRNA	973	1	{XP_009365457.1; PREDICTED: uncharacterized protein LOC103955308 [Pyrus x bretschneideri]}	{NA}	{NA}	{NA}	{NA}	{XR_531608.2; PREDICTED: Malus x domestica uncharacterized LOC103450809 (LOC103450809), ncRNA}	{NA}	1590.32	3255.87	3812.21	5584.92	1719.98	496.259	1.7932	0.0019548	0.028716	TRUE	1586.11	1764.47	-0.15375	0.7098	1	FALSE	1733.17	541.597	1.6781	0.0066682	0.055396	FALSE	1953.57	1560.01	0.32455	0.66515	0.95676	FALSE	2168.87	1538.54	0.49538	0.34698	0.97406	FALSE	2127.04	475.367	2.1617	6.3966e-05
MD12G1206600_novel10	MD12G1206600	Novel_lncRNA	229	1	{NA}	{NA}	{NA}	{NA}	{NA}	{XM_008361633.2; PREDICTED: Malus x domestica pyrophosphate-energized vacuolar membrane proton pump 1 (LOC103423547), mRNA}	{NA}	2619.98	2270.07	3196.25	3139.1	16.7898	11.998	0.48479	0.5453	0.85195	FALSE	21.6492	17.2413	0.32844	0.71913	1	FALSE	23.6216	13.082	0.85253	0.2479	0.56216	FALSE	18.9223	15.2522	0.31107	0.72834	0.98952	FALSE	20.9292	20.9792	-0.0034401	1	1	FALSE	20.4997	11.4824	0.83618	0.24438
MD12G1206700_novel01	MD12G1206700	Novel_lncRNA	1706	3	{NA}	{NA}	{NA}	{NA}	{NA}	{FJ263961.1; Malus x domestica cultivar Ralls alpha-farnesene synthase (AFS) gene, promoter region and intron 3}	{NA}	0	1.54667	0	0	1.7506	0	Inf	0.15195	0.46126	FALSE	0	1.79521	#NAME?	0.12018	1	FALSE	0	0	NA	NA	NA	NA	0	1.58647	#NAME?	0.21756	0.8485	FALSE	0	0	NA	NA	NA	NA	0	0	NA	NA
MD12G1209700_novel17	MD12G1209700	Novel_lncRNA	355	1	{NA}	{NA}	{NA}	{NA}	{NA}	{XM_017336460.1; PREDICTED: Malus x domestica eukaryotic translation initiation factor 3 subunit A-like (LOC103450881), transcript variant X3, mRNA}	{NA}	3029.43	1395.87	1864.28	2783.76	103.116	135.226	-0.3911	0.50837	0.81624	FALSE	115.109	105.844	0.12106	0.87175	1	FALSE	125.549	147.711	-0.23453	0.57596	0.83332	FALSE	147.465	93.62	0.65549	0.32209	0.86503	FALSE	163.167	111.753	0.54604	0.26818	0.93234	FALSE	159.859	129.499	0.30386	0.54916
MD12G1212300_novel12	MD12G1212300	Novel_lncRNA	1298	1	{XP_008246434.1; PREDICTED: serine/arginine-rich splicing factor SR30 isoform X2 [Prunus mume]}	{NA}	{NA}	{NA}	{NA}	{XR_001788089.1; PREDICTED: Malus x domestica uncharacterized LOC108171587 (LOC108171587), ncRNA}	{NA}	324.213	320.053	330.977	303.417	242.202	146.544	0.72487	0.21486	0.53841	FALSE	193.909	248.936	-0.36039	0.59736	1	FALSE	211.267	160.112	0.39999	0.34067	0.66319	FALSE	151.556	220.158	-0.53869	0.4332	0.90298	FALSE	167.279	188.42	-0.1717	0.72699	1	FALSE	163.545	140.4	0.22015	0.58696
MD12G1212300_novel13	MD12G1212300	Novel_lncRNA	1401	3	{XP_008246434.1; PREDICTED: serine/arginine-rich splicing factor SR30 isoform X2 [Prunus mume]}	{NA}	{NA}	{NA}	{NA}	{XR_001791761.1; PREDICTED: Malus x domestica serine/arginine-rich splicing factor SR30-like (LOC103450895), transcript variant X4, misc_RNA}	{NA}	1384.31	1749.2	1666.25	1285.57	1424.25	686.932	1.052	0.056797	0.27705	FALSE	1087.34	1463.17	-0.42829	0.47625	1	FALSE	1185.6	750.786	0.65914	0.099529	0.33946	FALSE	707.565	1294.15	-0.87107	0.20474	0.83852	FALSE	782.252	1057	-0.43427	0.42787	0.98512	FALSE	764.255	658.185	0.21556	0.59475
MD12G1232800	MD12G1232800	Novel_lncRNA	539	2	{NA}	{NA}	{NA}	{NA}	{NA}	{XR_526010.2; PREDICTED: Malus x domestica uncharacterized LOC103413975 (LOC103413975), ncRNA}	{NA}	60228.5	12932.4	12525.9	5205.84	2721.63	7397.08	-1.4425	0.10393	0.38168	FALSE	1988.43	2795.37	-0.49141	0.48909	1	FALSE	2159.92	8043.95	-1.8969	0.063721	0.26461	FALSE	742.58	2471.81	-1.735	0.008733	0.22234	FALSE	828.137	1936.35	-1.2254	0.11431	0.71555	FALSE	812.438	7070.45	-3.1215	0.0061498
MD12G1242500_novel03	MD12G1242500	Novel_lncRNA	325	1	{XP_017192046.1; PREDICTED: E3 ubiquitin protein ligase DRIP2-like isoform X2 [Malus domestica]}	{NA}	{mdm:103451040; K16277 DRIP E3 ubiquitin-protein ligase DRIP 2.3.2.27 -}	{NA}	{NA}	{XM_017336557.1; PREDICTED: Malus x domestica E3 ubiquitin protein ligase DRIP2-like (LOC103451040), transcript variant X2, mRNA}	{NA}	276.93	206.433	194.36	407.213	10.9228	9.32622	0.22797	0.77132	0.96964	FALSE	9.16369	11.1989	-0.28936	0.65869	1	FALSE	10.0259	10.1924	-0.023762	0.95432	1	FALSE	15.9679	9.90622	0.68877	0.40259	0.89416	FALSE	17.625	8.87419	0.98993	0.14449	0.78839	FALSE	17.1996	8.94548	0.94314	0.16298
MD12G1245000_novel01	MD12G1245000	Novel_lncRNA	552	1	{NA}	{NA}	{NA}	{NA}	{NA}	{XM_008390479.2; PREDICTED: Malus x domestica AT-hook motif nuclear-localized protein 14 (LOC103451052), mRNA}	{NA}	804.127	106.717	214.55	413.427	20.9498	103.369	-2.3028	0.00045072	0.010425	TRUE	36.0902	21.4759	0.74889	0.35365	1	FALSE	39.3634	112.805	-1.5189	0.001174	0.01548	TRUE	60.1466	19.0031	1.6622	0.022957	0.36814	FALSE	66.4207	34.949	0.92638	0.10742	0.71555	FALSE	65.1233	98.9503	-0.60353	0.15318
MD12G1256400_novel01	MD12G1256400	Novel_lncRNA	964	3	{AEJ72566.1; putative CC-NBS-LRR protein [Malus domestica]}	{NA}	{NA}	{NA}	{NA}	{HQ445899.1; Malus x domestica cultivar Evereste fire blight resistance locus LG12, complete sequence}	{NA}	3.06667	0	0.593333	0	0	0.955561	#NAME?	0.42667	0.75778	FALSE	0.252812	0	Inf	1	1	FALSE	0.274648	1.04022	-1.9212	0.68407	0.89375	FALSE	0	0	NA	NA	NA	NA	0	0.248911	#NAME?	1	1	FALSE	0	0.915368	#NAME?	0.45948
MD12G1263200_novel03	MD12G1263200	Novel_lncRNA	326	3	{NA}	{NA}	{NA}	{NA}	{NA}	{XM_008390596.2; PREDICTED: Malus x domestica calreticulin-3-like (LOC103451159), mRNA}	{NA}	22655	451.17	995.407	1905.38	22.9331	742.077	-5.0161	4.3637e-14	1.8589e-11	TRUE	41.6714	23.5418	0.82384	0.5666	1	FALSE	45.2831	809.87	-4.1606	2.7831e-18	1.141e-15	TRUE	75.1878	20.84	1.8511	0.028663	0.42928	FALSE	82.8396	40.2809	1.0402	0.23498	0.90778	FALSE	81.1156	710.202	-3.1302	4.6826e-10
MD13G1002700_novel13	MD13G1002700	Novel_lncRNA	240	1	{NA}	{NA}	{NA}	{NA}	{NA}	{XM_017331005.1; PREDICTED: Malus x domestica transcription factor DIVARICATA-like (LOC103430594), transcript variant X3, mRNA}	{NA}	4869.99	2560.79	2854.75	2736.76	26.8776	33.0369	-0.29767	0.7079	0.93316	FALSE	27.7419	27.5998	0.0074092	0.99815	1	FALSE	30.2476	36.0536	-0.25332	0.73008	0.91907	FALSE	23.0199	24.4172	-0.085021	0.89643	1	FALSE	25.4701	26.9814	-0.083161	0.86219	1	FALSE	24.9516	31.6615	-0.3436	0.56685
MD13G1006400_novel11	MD13G1006400	Novel_lncRNA	435	2	{NA}	{NA}	{NA}	{NA}	{GO:0003723; RNA binding; molecular_function}	{XM_008352747.2; PREDICTED: Malus x domestica nucleolin 2-like (LOC103414353), mRNA}	{PF12235:Fragile X-related 1 protein core C terminal}	29448.9	11481.6	14652.4	19012.5	1432.03	2297.63	-0.68209	0.22604	0.55341	FALSE	1536.8	1470.06	0.064051	0.91392	1	FALSE	1674.26	2507.27	-0.5826	0.16152	0.45204	FALSE	1718.73	1300.65	0.40211	0.58964	0.94374	FALSE	1900.21	1493.12	0.34783	0.57881	1	FALSE	1862.47	2198.74	-0.23946	0.58613
MD13G1007000_novel12	MD13G1007000	Novel_lncRNA	296	2	{XP_008340455.1; PREDICTED: alanine--tRNA ligase [Malus domestica]}	{NA}	{pxb:103943199; K01872 AARS, alaS alanyl-tRNA synthetase 6.1.1.7 ko00970; Genetic Information Processing; Translation; Aminoacyl-tRNA biosynthesis}	{NA}	{GO:0003676; nucleic acid binding; molecular_function}	{XM_008368751.2; PREDICTED: Malus x domestica alanine--tRNA ligase-like (LOC103430605), mRNA}	{PF02272:DHHA1 domain}	7642.37	2820.87	3820.19	5750.42	100.777	166.917	-0.72797	0.21633	0.53893	FALSE	117.906	103.464	0.18851	0.7734	1	FALSE	128.5	182.175	-0.50355	0.25812	0.57414	FALSE	155.199	91.5374	0.76169	0.26778	0.85852	FALSE	171.709	114.483	0.58483	0.27185	0.93234	FALSE	168.409	159.791	0.075785	0.98379
MD13G1008900_novel06	MD13G1008900	Novel_lncRNA	212	1	{NA}	{NA}	{NA}	{NA}	{NA}	{XM_008390887.2; PREDICTED: Malus x domestica uncharacterized LOC103451486 (LOC103451486), transcript variant X4, mRNA}	{NA}	691.223	459.607	834.753	977.823	1.91019	1.86493	0.034591	1	1	FALSE	3.07321	1.97362	0.6389	0.69373	1	FALSE	3.35617	2.04248	0.7165	0.67767	0.89375	FALSE	3.20359	1.74728	0.87458	0.61745	0.95592	FALSE	3.5605	2.9785	0.25749	0.97204	1	FALSE	3.50047	1.79143	0.96644	0.57919
MD13G1009300_novel01	MD13G1009300	Novel_lncRNA	344	1	{XP_008389102.1; PREDICTED: uncharacterized protein LOC103451481 [Malus domestica]}	{NA}	{mdm:103451481; - - - - -}	{NA}	{NA}	{XM_008390880.2; PREDICTED: Malus x domestica uncharacterized LOC103451481 (LOC103451481), mRNA}	{NA}	186.323	1009.8	280.927	570.877	79.2222	7.36538	3.4271	0.20895	0.5374	FALSE	15.6831	81.9496	-2.3855	0.31794	1	FALSE	17.1591	8.01442	1.0983	0.38962	0.69865	FALSE	27.4962	72.458	-1.3979	0.50153	0.91732	FALSE	30.5051	15.14	1.0107	0.11174	0.71555	FALSE	29.9448	7.0378	2.0891	0.0036562
MD13G1012900_novel01	MD13G1012900	Novel_lncRNA	1786	7	{NA}	{NA}	{NA}	{NA}	{NA}	{XR_001788900.1; PREDICTED: Malus x domestica uncharacterized LOC103426454 (LOC103426454), transcript variant X2, ncRNA}	{NA}	64.17	44.3633	36.4267	62.7933	50.806	42.4005	0.26092	0.70762	0.93316	FALSE	31.4827	52.1528	-0.72819	0.28788	1	FALSE	34.316	46.3354	-0.43324	0.43515	0.73231	FALSE	46.2459	46.1064	0.0043587	1	1	FALSE	51.3868	30.6157	0.74712	0.20603	0.88073	FALSE	50.3494	40.6033	0.31038	0.59657
MD13G1014500_novel01	MD13G1014500	Novel_lncRNA	2289	2	{NA}	{NA}	{NA}	{NA}	{NA}	{XR_526007.2; PREDICTED: Malus x domestica uncharacterized LOC103413974 (LOC103413974), ncRNA}	{NA}	325.427	166.01	229.86	200.233	240.881	286.707	-0.25126	0.63071	0.89635	FALSE	261.536	247.529	0.079414	0.86175	1	FALSE	285.033	313.297	-0.1364	0.75516	0.92692	FALSE	195.414	218.933	-0.16396	0.83095	1	FALSE	216.26	253.939	-0.23172	0.62861	1	FALSE	211.62	274.698	-0.37637	0.40875
MD13G1016500_novel01	MD13G1016500	Novel_lncRNA	308	1	{NA}	{NA}	{NA}	{NA}	{NA}	{XM_008390921.2; PREDICTED: Malus x domestica probable xyloglucan endotransglucosylase/hydrolase protein 28 (LOC103451515), mRNA}	{NA}	1386.84	885.32	995.413	1935.46	39.2101	36.2877	0.11174	0.92482	1	FALSE	36.7963	40.3327	-0.13239	0.9533	1	FALSE	40.0748	39.6479	0.015449	0.93574	1	FALSE	61.325	35.6804	0.78135	0.21237	0.8412	FALSE	67.4386	35.8048	0.91342	0.17939	0.85798	FALSE	65.9346	34.7596	0.92362	0.14488
MD13G1026200_novel01	MD13G1026200	Novel_lncRNA	801	1	{NA}	{NA}	{NA}	{NA}	{NA}	{XM_017336962.1; PREDICTED: Malus x domestica putative 1-phosphatidylinositol-3-phosphate 5-kinase FAB1C (LOC103451587), transcript variant X2, mRNA}	{NA}	1048.77	698.45	1121.24	1101.51	261.589	248.271	0.075383	0.84286	0.98974	FALSE	348.425	268.353	0.37672	0.58036	1	FALSE	380.117	271.089	0.48768	0.26993	0.58134	FALSE	287.832	237.386	0.278	0.62792	0.95614	FALSE	316.557	338.013	-0.094616	0.98692	1	FALSE	308.845	237.803	0.37712	0.31927
MD13G1031400_novel01	MD13G1031400	Novel_lncRNA	360	1	{NA}	{NA}	{NA}	{NA}	{NA}	{XM_008352628.2; PREDICTED: Malus x domestica ATP synthase subunit beta, mitochondrial (LOC103414229), mRNA}	{NA}	1629.73	674.76	911.44	2074.32	51.5246	75.8576	-0.55803	0.37327	0.71093	FALSE	57.9944	52.8952	0.13278	0.86429	1	FALSE	63.2159	82.7461	-0.3884	0.40633	0.71034	FALSE	113.663	46.7924	1.2804	0.050714	0.57132	FALSE	125.239	56.2836	1.1539	0.035071	0.5962	FALSE	122.573	72.5938	0.75572	0.1417
MD13G1040200_novel02	MD13G1040200	Novel_lncRNA	264	1	{NA}	{NA}	{NA}	{NA}	{NA}	{XM_008391055.1; PREDICTED: Malus x domestica universal stress protein YxiE-like (LOC103451639), mRNA}	{NA}	8307.91	5187.8	5394.63	4917.13	105.232	98.1308	0.10079	0.96471	1	FALSE	93.4707	108.297	-0.21241	0.81062	1	FALSE	101.875	107.367	-0.075746	0.84827	0.97122	FALSE	74.7814	95.8042	-0.35741	0.64682	0.95614	FALSE	82.8096	90.7825	-0.13262	0.79804	1	FALSE	81.029	94.0147	-0.21445	0.62486
MD13G1102200_novel01	MD13G1102200	Novel_lncRNA	2183	2	{NA}	{NA}	{NA}	{NA}	{NA}	{XR_001951374.1; PREDICTED: Pyrus x bretschneideri uncharacterized LOC108865589 (LOC108865589), ncRNA}	{NA}	296.823	25.3567	31.5133	56.65	32.2223	245.186	-2.9277	0.0018007	0.027073	TRUE	33.4335	32.9319	0.02181	0.90813	1	FALSE	36.4097	268.228	-2.8811	0.0013969	0.017635	TRUE	52.2807	29.1266	0.84394	0.32563	0.86722	FALSE	57.7896	32.4626	0.83203	0.21757	0.88073	FALSE	56.2987	234.747	-2.0599	0.017534
MD13G1102200_novel02	MD13G1102200	Novel_lncRNA	2167	2	{NA}	{NA}	{NA}	{NA}	{NA}	{XR_001951374.1; PREDICTED: Pyrus x bretschneideri uncharacterized LOC108865589 (LOC108865589), ncRNA}	{NA}	128.04	18.0867	36.1367	26.8067	24.3008	105.23	-2.1145	0.0015446	0.024074	TRUE	38.7825	24.7815	0.64614	0.44587	1	FALSE	42.229	115.025	-1.4456	0.0027504	0.027919	TRUE	24.4673	21.9017	0.15981	0.8861	1	FALSE	27.0213	37.7026	-0.48057	0.72368	1	FALSE	26.2381	100.76	-1.9412	0.002204
MD13G1114700_novel01	MD13G1114700	Novel_lncRNA	652	4	{XP_008346605.1; PREDICTED: uncharacterized protein LOC103409566 [Malus domestica]}	{NA}	{NA}	{NA}	{NA}	{XR_001789599.1; PREDICTED: Malus x domestica uncharacterized LOC108173003 (LOC108173003), ncRNA}	{NA}	518.603	453.42	408.447	468.37	131.273	89.5513	0.55179	0.38702	0.72523	FALSE	94.1088	135.092	-0.52154	0.41524	1	FALSE	102.762	97.8497	0.070671	0.94228	1	FALSE	91.4301	119.494	-0.3862	0.57079	0.93757	FALSE	101.471	91.3089	0.15224	0.77059	1	FALSE	99.4811	85.8137	0.21321	0.70294
MD13G1119800_novel02	MD13G1119800	Novel_lncRNA	230	1	{XP_002270170.1; PREDICTED: ubiquitin-40S ribosomal protein S27a [Vitis vinifera]}	{sp|P62981|RS27A_SOLTU; Ubiquitin-40S ribosomal protein S27a OS=Solanum tuberosum GN=UBI3 PE=2 SV=2}	{gra:105790414; K02977 RP-S27Ae, RPS27A small subunit ribosomal protein S27Ae - ko03010; Genetic Information Processing; Translation; Ribosome}	{At2g47110; KOG0004 Ubiquitin/40S ribosomal protein S27a fusion J Translation, ribosomal structure and biogenesis ;}	{NA}	{XM_008391645.2; PREDICTED: Malus x domestica ubiquitin-40S ribosomal protein S27a (LOC103452148), mRNA}	{NA}	9158.52	3137.65	4299.26	5485.87	24.3197	43.7407	-0.84685	0.19119	0.51767	FALSE	29.4303	25.0189	0.23428	0.69087	1	FALSE	32.032	47.7108	-0.5748	0.31984	0.63944	FALSE	34.1251	22.1402	0.62416	0.36923	0.88797	FALSE	37.577	28.5781	0.39494	0.55347	1	FALSE	36.7767	41.8754	-0.18731	0.72838
MD13G1126700_novel01	MD13G1126700	Novel_lncRNA	2475	5	{XP_017178426.1; PREDICTED: uncharacterized protein LOC103448718 isoform X1 [Malus domestica]}	{NA}	{NA}	{NA}	{NA}	{XR_001790976.1; PREDICTED: Malus x domestica uncharacterized LOC103443731 (LOC103443731), transcript variant X3, ncRNA}	{NA}	324.933	249.25	291.253	283.633	402.588	311.908	0.36818	0.56764	0.86612	FALSE	361.706	414.194	-0.19549	0.82344	1	FALSE	394.151	340.801	0.20982	0.61005	0.85274	FALSE	300.819	366.343	-0.2843	0.79391	1	FALSE	332.346	351.301	-0.080021	0.97739	1	FALSE	324.336	298.777	0.11842	0.67853
MD13G1145700_novel01	MD13G1145700	Novel_lncRNA	2732	6	{XP_017186159.1; PREDICTED: uncharacterized protein LOC108172717 [Malus domestica]}	{NA}	{NA}	{NA}	{NA}	{XR_531765.2; PREDICTED: Malus x domestica uncharacterized LOC103452646 (LOC103452646), ncRNA}	{NA}	248.42	176.54	217.633	157.347	304.149	266.078	0.19293	0.71153	0.93553	FALSE	302.249	312.205	-0.046756	0.93127	1	FALSE	329.426	290.54	0.18122	0.6617	0.89086	FALSE	187.495	276.154	-0.55862	0.36315	0.88678	FALSE	207.801	293.556	-0.49843	0.27679	0.94004	FALSE	203.503	254.811	-0.32438	0.45226
MD13G1162700_novel01	MD13G1162700	Novel_lncRNA	226	2	{NA}	{NA}	{NA}	{NA}	{NA}	{XM_008392391.2; PREDICTED: Malus x domestica 60S ribosomal protein L19-2 (LOC103452854), mRNA}	{NA}	18368.4	6193.51	7828.49	11905.2	41.7779	77.3071	-0.88786	0.14518	0.45058	FALSE	47.4859	42.9766	0.14395	0.79027	1	FALSE	51.731	84.2963	-0.70444	0.15506	0.44496	FALSE	65.0675	38.0325	0.7747	0.24821	0.85748	FALSE	71.8269	46.0965	0.63987	0.26202	0.92214	FALSE	70.4031	74.0109	-0.072099	0.82688
MD13G1163400_novel01	MD13G1163400	Novel_lncRNA	1042	2	{XP_017185395.1; PREDICTED: uncharacterized protein LOC108172390 [Malus domestica]}	{NA}	{NA}	{NA}	{NA}	{XR_001787454.1; PREDICTED: Malus x domestica uncharacterized LOC103414586 (LOC103414586), transcript variant X2, ncRNA}	{NA}	1508.57	201.933	397.543	376.717	96.9154	513.828	-2.4065	5.0116e-05	0.0019409	TRUE	170.237	99.5422	0.77416	0.43168	1	FALSE	185.152	560.996	-1.5993	0.00024446	0.0043425	TRUE	138.857	88.1508	0.65555	0.67391	0.95854	FALSE	151.596	165.148	-0.12353	0.93352	1	FALSE	147.868	492.082	-1.7346	0.00064803
MD13G1181100_novel02	MD13G1181100	Novel_lncRNA	688	1	{NA}	{NA}	{NA}	{NA}	{NA}	{XM_008392587.2; PREDICTED: Malus x domestica mitogen-activated protein kinase 15 (LOC103453055), mRNA}	{NA}	1069.07	118.177	323.353	388.857	32.1508	200.206	-2.6386	2.6277e-05	0.001158	TRUE	77.0288	32.9829	1.2237	0.11811	1	FALSE	83.7696	218.783	-1.385	0.0026378	0.027207	TRUE	80.7916	29.1988	1.4683	0.12147	0.78067	FALSE	88.7981	74.7839	0.2478	0.73442	1	FALSE	86.797	191.772	-1.1437	0.011465
MD13G1183100_novel05	MD13G1183100	Novel_lncRNA	1675	1	{XP_010103427.1; hypothetical protein L484_010028 [Morus notabilis]}	{NA}	{mdm:103453070; - - - - -}	{NA}	{NA}	{XR_669901.2; PREDICTED: Pyrus x bretschneideri uncharacterized LOC103964629 (LOC103964629), ncRNA}	{NA}	73.2933	46.46	61.8533	62.8233	46.0684	45.299	0.0243	1	1	FALSE	49.1832	47.37	0.054192	0.92674	1	FALSE	53.6287	49.499	0.11561	0.84134	0.96769	FALSE	42.8319	41.9076	0.031474	0.91769	1	FALSE	47.3764	47.7078	-0.010058	0.98212	1	FALSE	46.3367	43.4223	0.093718	0.82542
MD13G1192300_novel04	MD13G1192300	Novel_lncRNA	292	2	{NA}	{NA}	{NA}	{NA}	{NA}	{XR_525333.1; PREDICTED: Malus x domestica uncharacterized LOC103410284 (LOC103410284), ncRNA}	{NA}	5020.72	2095.27	2814.4	4209.49	71.3162	102.813	-0.52772	0.41605	0.74889	FALSE	82.5508	73.0827	0.17575	0.8498	1	FALSE	90.0309	112.194	-0.3175	0.4757	0.77314	FALSE	106.688	64.6247	0.72325	0.29517	0.86303	FALSE	117.898	80.1425	0.5569	0.26112	0.92214	FALSE	115.455	98.419	0.23033	0.64668
MD13G1192400_novel01	MD13G1192400	Novel_lncRNA	2123	1	{NA}	{NA}	{NA}	{NA}	{NA}	{XR_526677.2; PREDICTED: Malus x domestica uncharacterized LOC103418038 (LOC103418038), ncRNA}	{NA}	58.9533	46.6533	75.11	33.7033	62.3326	47.8257	0.3822	0.54804	0.85519	FALSE	78.1491	64.0648	0.2867	0.61272	1	FALSE	85.1368	52.2671	0.70388	0.13156	0.4016	FALSE	30.2416	56.6651	-0.90593	0.16609	0.81275	FALSE	33.5111	75.8649	-1.1788	0.020611	0.58778	FALSE	32.8655	45.8523	-0.48042	0.3332
MD13G1192400_novel02	MD13G1192400	Novel_lncRNA	1944	2	{CBL94176.1; hypothetical protein [Malus domestica]}	{NA}	{NA}	{NA}	{NA}	{XR_526677.2; PREDICTED: Malus x domestica uncharacterized LOC103418038 (LOC103418038), ncRNA}	{NA}	114.823	85.25	92.21	101.313	105.445	83.5414	0.33593	0.63616	0.89835	FALSE	86.8072	108.442	-0.32104	0.65188	1	FALSE	94.6135	91.2368	0.05243	0.95416	1	FALSE	82.2017	95.9044	-0.22243	0.85929	1	FALSE	90.9512	84.2413	0.11057	0.71902	1	FALSE	88.803	79.9624	0.15129	0.66394
MD13G1203600_novel08	MD13G1203600	Novel_lncRNA	343	1	{NA}	{NA}	{NA}	{NA}	{NA}	{XM_017335904.1; PREDICTED: Malus x domestica acylamino-acid-releasing enzyme-like (LOC103447357), mRNA}	{NA}	1159.42	169.537	303.133	401.017	10.3519	45.838	-2.1467	0.0034151	0.042153	TRUE	16.3171	10.6057	0.62155	0.523	1	FALSE	17.7758	49.9984	-1.492	0.0097229	0.073216	FALSE	19.0329	9.38555	1.02	0.28069	0.86303	FALSE	21.0635	15.8302	0.41207	0.63371	1	FALSE	20.6611	43.862	-1.0861	0.043928
MD13G1218700_novel03	MD13G1218700	Novel_lncRNA	421	3	{XP_008360428.1; PREDICTED: cyanate hydratase [Malus domestica]}	{sp|A5BJL8|CYNS_VITVI; Cyanate hydratase OS=Vitis vinifera GN=CYN PE=3 SV=1}	{pmum:103323911; K01725 cynS cyanate lyase 4.2.1.104 ko00910; Metabolism; Energy metabolism; Nitrogen metabolism}	{NA}	{NA}	{XM_008369002.2; PREDICTED: Malus x domestica cyanate hydratase (LOC103430865), transcript variant X1, mRNA}	{NA}	3783.74	5197.29	17377.7	13367	568.521	273.206	1.0572	0.1948	0.5206	FALSE	1651.29	581.933	1.5047	0.016895	1	FALSE	1799.08	298.026	2.5937	3.9995e-06	0.00014615	TRUE	1123.3	514.931	1.1253	0.11667	0.77959	FALSE	1243.5	1599.97	-0.36364	0.46022	0.98512	FALSE	1218.57	261.443	2.2206	1.8155e-05
MD13G1219100_novel04	MD13G1219100	Novel_lncRNA	3131	6	{XP_008348525.1; PREDICTED: uncharacterized protein LOC103411670 isoform X3 [Malus domestica]}	{NA}	{mdm:103449572; K08064 NFYA nuclear transcription factor Y, alpha - ko04612; Organismal Systems; Immune system; Antigen processing and presentation | ko05152; Human Diseases; Infectious diseases: Bacterial; Tuberculosis}	{NA}	{NA}	{XR_526098.2; PREDICTED: Malus x domestica uncharacterized LOC103414746 (LOC103414746), ncRNA}	{NA}	527.777	356.43	296.43	295.75	794.053	655.661	0.27628	0.86022	0.99145	FALSE	474.244	819.591	-0.78927	0.489	1	FALSE	517.06	715.292	-0.4682	0.2325	0.54662	FALSE	404.523	724.863	-0.84149	0.48406	0.91345	FALSE	446.114	459.844	-0.043731	0.98197	1	FALSE	435.837	627.588	-0.52603	0.30933
MD13G1219100_novel06	MD13G1219100	Novel_lncRNA	2246	3	{XP_008348522.1; PREDICTED: uncharacterized protein LOC103411670 isoform X1 [Malus domestica]}	{NA}	{pxb:103943711; - - - - -}	{NA}	{NA}	{XR_523859.2; PREDICTED: Malus x domestica probable phosphoribosylformylglycinamidine synthase, chloroplastic/mitochondrial (LOC103401228), misc_RNA}	{NA}	265.157	227.43	359.467	186.247	309.624	228.71	0.437	0.3658	0.70406	FALSE	400.521	317.142	0.33675	0.63879	1	FALSE	436.511	249.801	0.80524	0.05524	0.24279	FALSE	175.611	280.487	-0.67555	0.30598	0.86303	FALSE	193.328	388.884	-1.0083	0.056178	0.64171	FALSE	188.382	219.097	-0.21791	0.80818
MD13G1274300_novel01	MD13G1274300	Novel_lncRNA	1137	1	{NA}	{NA}	{NA}	{NA}	{NA}	{AB270792.1; Malus x domestica MdSFBB9-alpha, S9-RNase, MdSFBB9-beta genes, complete cds, Psi-SFBB9-alpha, Psi-SFBB9-beta pseudogenes}	{NA}	61.2867	38.5133	44.03	78.45	25.3339	23.1376	0.13083	0.95491	1	FALSE	22.2305	26.0798	-0.23039	0.80562	1	FALSE	24.2743	25.2272	-0.055551	0.88659	0.9893	FALSE	33.6259	23.0652	0.54386	0.4092	0.90124	FALSE	37.3427	21.5621	0.79233	0.19894	0.87214	FALSE	36.6133	22.1287	0.72645	0.24345
MD13G1274600_novel02	MD13G1274600	Novel_lncRNA	253	1	{NA}	{NA}	{NA}	{NA}	{NA}	{XM_008363113.2; PREDICTED: Malus x domestica UDP-glucuronate 4-epimerase 1 (LOC103425033), mRNA}	{NA}	876.257	203.927	304.027	301.997	2.95912	8.18081	-1.4671	0.23491	0.5622	FALSE	4.05921	3.02588	0.42385	0.8521	1	FALSE	4.42032	8.96072	-1.0195	0.31418	0.63493	FALSE	3.55992	2.676	0.41177	0.86342	1	FALSE	3.92601	3.94579	-0.0072485	1	1	FALSE	3.83374	7.84691	-1.0334	0.33361
MD13G1276300_novel01	MD13G1276300	Novel_lncRNA	2210	1	{NA}	{NA}	{NA}	{NA}	{NA}	{XR_530539.2; PREDICTED: Malus x domestica uncharacterized LOC103443678 (LOC103443678), ncRNA}	{NA}	258.373	227.377	243.573	203.343	310.184	218.165	0.50771	0.32685	0.66517	FALSE	272.62	317.963	-0.22196	0.68885	1	FALSE	297.232	238.236	0.3192	0.42143	0.72156	FALSE	191.57	281.196	-0.55371	0.39465	0.89123	FALSE	212.391	265.353	-0.32119	0.55469	1	FALSE	207.512	208.906	-0.0096611	0.93033
MD13G1277000_novel01	MD13G1277000	Novel_lncRNA	2096	3	{NA}	{NA}	{NA}	{NA}	{NA}	{AB545982.1; Pyrus pyrifolia genes for F-box proteins and S2-RNase, complete cds, haplotype: S2}	{NA}	77.6833	29.6667	33.18	29.3167	39.8128	61.7126	-0.63233	0.34411	0.6779	FALSE	34.5381	40.8002	-0.24039	0.62452	1	FALSE	37.7162	67.2789	-0.83497	0.078227	0.29047	FALSE	25.7813	36.0699	-0.48447	0.47208	0.91281	FALSE	28.4715	33.4606	-0.23294	0.79488	1	FALSE	27.844	59.0479	-1.0845	0.042651
MD13G1279700_novel01	MD13G1279700	Novel_lncRNA	3728	1	{NA}	{NA}	{NA}	{NA}	{NA}	{XR_001790123.1; PREDICTED: Malus x domestica uncharacterized LOC103435435 (LOC103435435), transcript variant X2, ncRNA}	{NA}	228.4	133.783	179.953	155.907	321.492	342.017	-0.089288	0.86034	0.99145	FALSE	349.637	330.227	0.082403	0.866	1	FALSE	380.958	373.584	0.028201	0.93952	1	FALSE	258.792	292.127	-0.1748	0.80707	1	FALSE	286.167	339.688	-0.24735	0.60743	1	FALSE	279.904	327.473	-0.22644	0.62848
MD14G1003300_novel02	MD14G1003300	Novel_lncRNA	1836	2	{XP_008391695.1; PREDICTED: superoxide dismutase [Cu-Zn] 2-like isoform X2 [Malus domestica]}	{sp|C0HK70|SODC_ZINOF; Superoxide dismutase [Cu-Zn] OS=Zingiber officinale PE=1 SV=1}	{pper:PRUPE_ppa012725mg; K04565 SOD1 superoxide dismutase, Cu-Zn family 1.15.1.1 ko04146; Cellular Processes; Transport and catabolism; Peroxisome | ko04213; Organismal Systems; Aging; Longevity regulating pathway - multiple species | ko05014; Human Diseases; Neurodegenerative diseases; Amyotrophic lateral sclerosis (ALS) | ko05016; Human Diseases; Neurodegenerative diseases; Huntington's disease…	{At1g08830; KOG0441 Cu2+/Zn2+ superoxide dismutase SOD1 P Inorganic ion transport and metabolism ;}	{NA}	{XM_008393474.2; PREDICTED: Malus x domestica superoxide dismutase [Cu-Zn] 2-like (LOC103453882), transcript variant X3, mRNA}	{NA}	252.52	309.847	369.163	205.23	323.542	172.593	0.90658	0.08205	0.34156	FALSE	331.895	331.483	0.0017916	0.94606	1	FALSE	361.742	188.418	0.94102	0.024493	0.13563	FALSE	154.796	293.261	-0.92181	0.13743	0.78796	FALSE	170.794	322.895	-0.91881	0.059955	0.64311	FALSE	166.801	165.265	0.013345	0.88899
MD14G1010300_novel02	MD14G1010300	Novel_lncRNA	325	1	{NA}	{NA}	{NA}	{NA}	{NA}	{XM_008393504.2; PREDICTED: Malus x domestica peroxidase 57-like (LOC103453913), mRNA}	{NA}	6168.36	4037.76	3357.22	10068.1	201.249	204.279	-0.02156	0.88394	0.99621	FALSE	158.322	205.778	-0.37822	0.54864	1	FALSE	172.907	222.935	-0.36663	0.42564	0.72392	FALSE	396.424	182.07	1.1225	0.25384	0.85748	FALSE	438.931	153.827	1.5127	0.058195	0.64171	FALSE	431.223	195.694	1.1398	0.13484
MD14G1019200_novel01	MD14G1019200	Novel_lncRNA	326	1	{NA}	{NA}	{NA}	{NA}	{NA}	{XM_017331100.1; PREDICTED: Malus x domestica transcriptional activator hacA-like (LOC103430934), transcript variant X2, mRNA}	{NA}	346.753	232.533	330.487	551.923	13.4866	11.4897	0.23118	0.96341	1	FALSE	15.3417	13.9302	0.13924	0.73312	1	FALSE	16.7289	12.5769	0.41156	0.60877	0.85274	FALSE	22.1128	12.3259	0.84319	0.20282	0.83852	FALSE	24.5411	14.9068	0.71923	0.29622	0.95378	FALSE	24.0193	11.0144	1.1248	0.099897
MD14G1022900_novel02	MD14G1022900	Novel_lncRNA	221	1	{NA}	{NA}	{NA}	{NA}	{NA}	{XM_008371499.2; PREDICTED: Malus x domestica 60S ribosomal protein L10a-like (LOC103433256), mRNA}	{NA}	10264.2	3095.51	5191.9	5995.09	17.2666	34.9494	-1.0173	0.1444	0.45058	FALSE	26.113	17.7264	0.55887	0.48586	1	FALSE	28.4534	38.2647	-0.42741	0.42103	0.72156	FALSE	27.5247	15.687	0.81115	0.30573	0.86303	FALSE	30.4709	25.3094	0.26776	0.70185	1	FALSE	29.8599	33.5012	-0.166	0.71215
MD14G1029900_novel03	MD14G1029900	Novel_lncRNA	291	1	{XP_008391875.1; PREDICTED: sorting nexin 1-like isoform X1 [Malus domestica]}	{NA}	{mdm:103449486; K17917 SNX1_2 sorting nexin-1/2 - ko04144; Cellular Processes; Transport and catabolism; Endocytosis}	{NA}	{NA}	{XM_008393654.2; PREDICTED: Malus x domestica sorting nexin 1-like (LOC103454071), transcript variant X2, mRNA}	{NA}	3949.19	2137.59	2040.76	2456.31	73.5936	79.2425	-0.10669	0.85216	0.98974	FALSE	59.3705	75.5863	-0.34838	0.60735	1	FALSE	64.7355	86.4389	-0.41712	0.38949	0.69865	FALSE	61.2768	66.8416	-0.1254	0.85242	1	FALSE	67.7087	57.7067	0.2306	0.69458	1	FALSE	66.294	75.8346	-0.19398	0.66035
MD14G1038600_novel04	MD14G1038600	Novel_lncRNA	1015	1	{NA}	{NA}	{NA}	{NA}	{NA}	{XM_009350765.2; PREDICTED: Pyrus x bretschneideri mediator of RNA polymerase II transcription subunit 27 (LOC103940612), mRNA}	{NA}	12.1967	2.30333	3.99667	9.02333	1.31935	4.01693	-1.6063	0.35271	0.68715	FALSE	1.83485	1.34757	0.4453	1	1	FALSE	2.00863	4.37986	-1.1247	0.39057	0.69865	FALSE	3.40101	1.19061	1.5143	0.49378	0.91345	FALSE	3.80531	1.78361	1.0932	0.5943	1	FALSE	3.75706	3.84534	-0.033508	0.92258
MD14G1046400_novel01	MD14G1046400	Novel_lncRNA	1731	4	{XP_017182152.1; PREDICTED: uncharacterized protein LOC108171048 [Malus domestica]}	{sp|Q9FPT1|UBP12_ARATH; Ubiquitin carboxyl-terminal hydrolase 12 OS=Arabidopsis thaliana GN=UBP12 PE=2 SV=2}	{mdm:103449610; - - - - -}	{At5g06600; KOG1863 Ubiquitin carboxyl-terminal hydrolase O Posttranslational modification, protein turnover, chaperones ;}	{NA}	{XM_017326663.1; PREDICTED: Malus x domestica uncharacterized LOC108171048 (LOC108171048), mRNA}	{NA}	28.6133	8.06333	6.02333	4.13333	8.09813	18.4015	-1.1842	0.2499	0.58689	FALSE	5.07091	8.24445	-0.70118	0.59586	1	FALSE	5.51017	20.1361	-1.8696	0.039552	0.18667	FALSE	2.92308	7.28678	-1.3178	0.29166	0.86303	FALSE	3.23027	4.96273	-0.61948	0.53675	1	FALSE	3.17711	17.6515	-2.474	0.0040144
MD14G1047800_novel02	MD14G1047800	Novel_lncRNA	221	1	{NA}	{NA}	{NA}	{NA}	{NA}	{XM_008393320.2; PREDICTED: Malus x domestica 40S ribosomal protein S28-like (LOC103453752), mRNA}	{NA}	8368.54	2030.67	3152.72	7343.08	11.3483	28.6167	-1.3344	0.071466	0.31603	FALSE	16.631	11.6747	0.51049	0.50976	1	FALSE	18.1366	31.1723	-0.78136	0.23416	0.54806	FALSE	33.8036	10.3351	1.7096	0.05184	0.57888	FALSE	37.3105	16.1797	1.2054	0.1197	0.73137	FALSE	36.5949	27.3691	0.4191	0.59111
MD14G1048300_novel01	MD14G1048300	Novel_lncRNA	309	1	{NA}	{NA}	{NA}	{NA}	{NA}	{XM_008393324.2; PREDICTED: Malus x domestica 40S ribosomal protein S28-like (LOC103453755), mRNA}	{NA}	4095.59	1550.29	1916.63	2715.64	66.3902	108.784	-0.71242	0.26123	0.59797	FALSE	71.1599	68.0928	0.063561	0.94527	1	FALSE	77.5061	118.645	-0.61427	0.20616	0.516	FALSE	87.688	60.2413	0.54163	0.48237	0.91345	FALSE	96.8653	69.1734	0.48576	0.41973	0.98512	FALSE	94.9926	104.122	-0.13239	0.6785
MD14G1056600_novel01	MD14G1056600	Novel_lncRNA	2134	2	{NA}	{NA}	{NA}	{NA}	{NA}	{XM_018645400.1; PREDICTED: Pyrus x bretschneideri protein cornichon homolog 4-like (LOC103938957), transcript variant X2, mRNA}	{NA}	84.3667	88.7867	71.3133	49.2533	116.327	68.5057	0.76389	0.2312	0.55746	FALSE	75.4817	119.762	-0.66597	0.29362	1	FALSE	82.3755	74.8584	0.13805	0.85403	0.97266	FALSE	44.1071	105.967	-1.2645	0.071988	0.65457	FALSE	48.663	73.1743	-0.58851	0.33579	0.97015	FALSE	47.508	65.6203	-0.46597	0.40359
MD14G1080300	MD14G1080300	Annotated_lncRNA	351	2	{NA}	{NA}	{NA}	{NA}	{GO:0003677; DNA binding; molecular_function GO:0006352; transcription initiation, DNA-dependent; biological_process}	{XR_525165.2; PREDICTED: Malus x domestica uncharacterized LOC103409451 (LOC103409451), ncRNA}	{PF00352:Transcription factor TFIID (or TATA-binding protein, TBP)}	2719.14	626.897	851.703	1666.31	44.2326	116.575	-1.3981	0.019794	0.14793	FALSE	49.015	45.4625	0.10855	0.79542	1	FALSE	53.3	127.231	-1.2552	0.010167	0.07462	FALSE	84.5575	40.223	1.0719	0.10187	0.73696	FALSE	93.232	47.663	0.96795	0.11236	0.71555	FALSE	91.2941	111.586	-0.28957	0.48175
MD14G1082200_novel01	MD14G1082200	Novel_lncRNA	1689	3	{XP_008392809.1; PREDICTED: pentatricopeptide repeat-containing protein At4g17616 [Malus domestica]}	{sp|B3H672|PP317_ARATH; Pentatricopeptide repeat-containing protein At4g17616 OS=Arabidopsis thaliana GN=At4g17616 PE=2 SV=1}	{pper:PRUPE_ppa019323mg; - - - - -}	{NA}	{NA}	{XR_525706.2; PREDICTED: Malus x domestica uncharacterized LOC103412437 (LOC103412437), transcript variant X2, ncRNA}	{NA}	128.177	120.633	136.663	101.46	118.246	79.4475	0.57372	0.29011	0.63244	FALSE	110.477	121.186	-0.13347	0.78707	1	FALSE	120.38	86.8246	0.47142	0.2861	0.60383	FALSE	69.972	107.188	-0.6153	0.31862	0.86303	FALSE	77.4547	107.399	-0.47155	0.34364	0.97406	FALSE	75.7311	76.1061	-0.0071251	0.98424
MD14G1095000_novel01	MD14G1095000	Novel_lncRNA	1385	3	{XP_008352206.1; PREDICTED: DNA-directed RNA polymerase 3, chloroplastic-like [Malus domestica]}	{NA}	{NA}	{NA}	{NA}	{XR_001792208.1; PREDICTED: Malus x domestica uncharacterized LOC108175319 (LOC108175319), ncRNA}	{NA}	170.13	76.4	62.5333	34.0167	60.9539	82.7576	-0.44117	0.39456	0.73399	FALSE	39.368	62.7882	-0.67347	0.36353	1	FALSE	42.8816	90.3213	-1.0747	0.027155	0.14593	FALSE	18.4713	55.5551	-1.5886	0.029438	0.43025	FALSE	20.4248	38.2262	-0.90424	0.14558	0.78839	FALSE	19.9768	79.2009	-1.9872	0.00017138
MD14G1096400_novel03	MD14G1096400	Novel_lncRNA	239	1	{NA}	{NA}	{NA}	{NA}	{NA}	{XM_008369211.2; PREDICTED: Malus x domestica aspartic proteinase-like protein 2 (LOC103431061), mRNA}	{NA}	0	0	0	0	0	0	NA	NA	NA	NA	0	0	NA	NA	NA	NA	0	0	NA	NA	NA	NA	0	0	NA	NA	NA	NA	0	0	NA	NA	NA	NA	0	0	NA	NA
MD14G1104900_novel01	MD14G1104900	Novel_lncRNA	3919	4	{XP_009376783.1; PREDICTED: uncharacterized protein LOC103965446 [Pyrus x bretschneideri]}	{NA}	{pmum:103323543; K16803 CKAP5, XMAP215 cytoskeleton-associated protein 5 - -}	{NA}	{NA}	{XR_001788695.1; PREDICTED: Malus x domestica uncharacterized LOC108172135 (LOC108172135), transcript variant X3, ncRNA}	{NA}	50.16	94.1667	100.04	53.66	234.44	79.4507	1.5611	0.0046615	0.052594	FALSE	205.693	240.203	-0.22376	0.65506	1	FALSE	224.125	86.5466	1.3728	0.0017289	0.020356	TRUE	93.7749	212.457	-1.1799	0.04886	0.56035	FALSE	103.576	199.938	-0.94887	0.03871	0.61028	FALSE	101.415	76.0265	0.4157	0.36582
MD14G1104900_novel02	MD14G1104900	Novel_lncRNA	4157	4	{XP_009376783.1; PREDICTED: uncharacterized protein LOC103965446 [Pyrus x bretschneideri]}	{NA}	{pmum:103323543; K16803 CKAP5, XMAP215 cytoskeleton-associated protein 5 - -}	{NA}	{NA}	{XR_001788695.1; PREDICTED: Malus x domestica uncharacterized LOC108172135 (LOC108172135), transcript variant X3, ncRNA}	{NA}	51.6833	11.7433	22.76	12.6633	26.8697	86.9116	-1.6936	0.021489	0.15429	FALSE	52.2646	27.6709	0.91747	0.615	1	FALSE	56.8099	94.9977	-0.74175	0.59428	0.84547	FALSE	23.2573	24.5169	-0.076092	0.92747	1	FALSE	25.6335	51.3768	-1.0031	0.70894	1	FALSE	24.7743	83.2218	-1.7481	0.064198
MD14G1104900_novel04	MD14G1104900	Novel_lncRNA	2484	5	{XP_009376783.1; PREDICTED: uncharacterized protein LOC103965446 [Pyrus x bretschneideri]}	{NA}	{pmum:103323543; K16803 CKAP5, XMAP215 cytoskeleton-associated protein 5 - -}	{NA}	{NA}	{XR_001788694.1; PREDICTED: Malus x domestica uncharacterized LOC108172135 (LOC108172135), transcript variant X2, ncRNA}	{NA}	49.42	45.7167	54.8967	57.58	78.7728	47.3052	0.7357	0.3869	0.72523	FALSE	71.9586	80.9651	-0.17013	0.91153	1	FALSE	78.5649	51.6786	0.60432	0.36318	0.67384	FALSE	62.1289	71.5728	-0.20415	0.93004	1	FALSE	68.9917	70.1009	-0.023009	0.97394	1	FALSE	67.3694	45.2934	0.57279	0.40186
MD14G1104900_novel05	MD14G1104900	Novel_lncRNA	1632	5	{XP_009376783.1; PREDICTED: uncharacterized protein LOC103965446 [Pyrus x bretschneideri]}	{NA}	{pmum:103323543; K16803 CKAP5, XMAP215 cytoskeleton-associated protein 5 - -}	{NA}	{NA}	{XR_001788695.1; PREDICTED: Malus x domestica uncharacterized LOC108172135 (LOC108172135), transcript variant X3, ncRNA}	{NA}	74.77	53.9167	67.2533	63.89	47.9217	44.3657	0.11123	0.83364	0.98647	FALSE	50.5126	49.1746	0.038728	0.93235	1	FALSE	54.8784	48.2786	0.18485	0.70812	0.91042	FALSE	42.0416	43.5191	-0.049833	1	1	FALSE	46.4189	49.154	-0.082597	0.93245	1	FALSE	45.2727	42.4047	0.094418	0.76509
MD14G1104900_novel06	MD14G1104900	Novel_lncRNA	1758	6	{XP_009376783.1; PREDICTED: uncharacterized protein LOC103965446 [Pyrus x bretschneideri]}	{NA}	{pmum:103323543; K16803 CKAP5, XMAP215 cytoskeleton-associated protein 5 - -}	{NA}	{NA}	{XR_001788694.1; PREDICTED: Malus x domestica uncharacterized LOC108172135 (LOC108172135), transcript variant X2, ncRNA}	{NA}	396.923	282.277	411.797	373.607	293.533	257.08	0.19131	0.70357	0.93316	FALSE	352.612	301.165	0.22753	0.70689	1	FALSE	384.456	280.616	0.45422	0.27017	0.58134	FALSE	269.236	266.386	0.015357	1	1	FALSE	297.616	342.897	-0.20432	0.65057	1	FALSE	291.223	246.091	0.24294	0.5962
MD14G1104900_novel08	MD14G1104900	Novel_lncRNA	1025	7	{XP_009376783.1; PREDICTED: uncharacterized protein LOC103965446 [Pyrus x bretschneideri]}	{NA}	{pmum:103323543; K16803 CKAP5, XMAP215 cytoskeleton-associated protein 5 - -}	{NA}	{NA}	{XR_532052.2; PREDICTED: Malus x domestica uncharacterized LOC103454755 (LOC103454755), transcript variant X1, ncRNA}	{NA}	86.13	88.1267	77.3767	167.04	52.4862	28.848	0.86347	0.29866	0.64169	FALSE	34.0847	53.9821	-0.66336	0.41886	1	FALSE	37.2008	31.5369	0.23829	0.71817	0.91398	FALSE	62.747	47.7252	0.39479	0.51415	0.92549	FALSE	69.6846	33.1047	1.0738	0.04985	0.635	FALSE	68.3182	27.6369	1.3057	0.014127
MD14G1104900_novel09	MD14G1104900	Novel_lncRNA	4507	2	{XP_009376783.1; PREDICTED: uncharacterized protein LOC103965446 [Pyrus x bretschneideri]}	{NA}	{pmum:103323543; K16803 CKAP5, XMAP215 cytoskeleton-associated protein 5 - -}	{NA}	{NA}	{XR_001788695.1; PREDICTED: Malus x domestica uncharacterized LOC108172135 (LOC108172135), transcript variant X3, ncRNA}	{NA}	65.0633	42.07	51.9233	23.69	111.515	119.725	-0.10248	0.98636	1	FALSE	125.66	114.171	0.13833	0.9291	1	FALSE	136.955	131.068	0.06338	0.84285	0.96845	FALSE	47.1751	101.042	-1.0989	0.41559	0.90298	FALSE	51.7912	122.331	-1.24	0.12698	0.7535	FALSE	50.2138	114.798	-1.1929	0.18002
MD14G1104900_novel10	MD14G1104900	Novel_lncRNA	3397	3	{XP_009376783.1; PREDICTED: uncharacterized protein LOC103965446 [Pyrus x bretschneideri]}	{NA}	{pmum:103323543; K16803 CKAP5, XMAP215 cytoskeleton-associated protein 5 - -}	{NA}	{NA}	{XR_001788695.1; PREDICTED: Malus x domestica uncharacterized LOC108172135 (LOC108172135), transcript variant X3, ncRNA}	{NA}	88.3567	90.74	103.343	109.01	197.397	120.448	0.71269	0.16774	0.48501	FALSE	181.67	202.164	-0.15421	0.66278	1	FALSE	198.226	131.526	0.5918	0.20785	0.51822	FALSE	163.554	178.778	-0.1284	0.75325	1	FALSE	180.767	176.028	0.038327	0.90419	1	FALSE	176.993	115.401	0.61704	0.1693
MD14G1104900_novel11	MD14G1104900	Novel_lncRNA	3855	2	{XP_009376783.1; PREDICTED: uncharacterized protein LOC103965446 [Pyrus x bretschneideri]}	{NA}	{pmum:103323543; K16803 CKAP5, XMAP215 cytoskeleton-associated protein 5 - -}	{NA}	{NA}	{XR_001788695.1; PREDICTED: Malus x domestica uncharacterized LOC108172135 (LOC108172135), transcript variant X3, ncRNA}	{NA}	4.82333	0	2.42667	7.10667	0	7.40648	#NAME?	0.23996	0.57215	FALSE	4.81719	0	Inf	0.012242	1	FALSE	5.25301	8.01276	-0.60915	0.77354	0.94046	FALSE	12.1354	0	Inf	0.00011785	0.011541	TRUE	13.3971	4.67122	1.52	0.10277	0.71555	FALSE	13.1369	7.05113	0.8977	0.51501
MD14G1104900_novel12	MD14G1104900	Novel_lncRNA	2472	3	{XP_009376783.1; PREDICTED: uncharacterized protein LOC103965446 [Pyrus x bretschneideri]}	{NA}	{pmum:103323543; K16803 CKAP5, XMAP215 cytoskeleton-associated protein 5 - -}	{NA}	{NA}	{XR_001788695.1; PREDICTED: Malus x domestica uncharacterized LOC108172135 (LOC108172135), transcript variant X3, ncRNA}	{NA}	19.34	22.6933	33.4633	51.05	35.3381	18.7913	0.91116	0.43097	0.76074	FALSE	41.5968	36.019	0.20772	0.89644	1	FALSE	45.2058	20.5108	1.1401	0.22705	0.54178	FALSE	55.514	31.8285	0.80253	0.63811	0.95614	FALSE	62.1426	40.6014	0.61405	0.70814	1	FALSE	61.0855	18.0342	1.7601	0.23879
MD14G1109300_novel04	MD14G1109300	Novel_lncRNA	498	1	{NA}	{NA}	{NA}	{NA}	{NA}	{NA}	{NA}	3089.56	1373.81	1306.06	2080.7	254.118	324.534	-0.35287	0.4729	0.79563	FALSE	184.101	261.36	-0.50554	0.43059	1	FALSE	200.826	353.754	-0.8168	0.051636	0.22852	FALSE	251.529	231.103	0.12219	0.85825	1	FALSE	278.731	178.63	0.6419	0.21437	0.88073	FALSE	273.529	310.454	-0.18268	0.57567
MD14G1110100_novel01	MD14G1110100	Novel_lncRNA	1954	4	{NA}	{NA}	{NA}	{NA}	{NA}	{XR_001788891.1; PREDICTED: Malus x domestica uncharacterized LOC108172353 (LOC108172353), ncRNA}	{NA}	259.33	254.003	321.17	240.983	289.504	190.08	0.60698	0.23162	0.55746	FALSE	301.656	296.516	0.024794	0.96077	1	FALSE	328.442	207.663	0.66139	0.11764	0.37805	FALSE	196.824	262.284	-0.41423	0.49844	0.9155	FALSE	217.861	292.935	-0.42718	0.40813	0.98512	FALSE	212.821	182.035	0.22543	0.5427
MD14G1110100_novel02	MD14G1110100	Novel_lncRNA	2914	3	{NA}	{NA}	{NA}	{NA}	{NA}	{XR_532094.2; PREDICTED: Malus x domestica uncharacterized LOC103455031 (LOC103455031), ncRNA}	{NA}	60.2667	138.807	184.357	149.9	259.017	69.2137	1.9039	0.0010872	0.018527	TRUE	278.597	265.908	0.067252	0.91196	1	FALSE	303.86	75.622	2.0065	1.0031e-05	0.0002851	TRUE	191.474	235.189	-0.29668	0.69741	0.97347	FALSE	212.1	270.756	-0.35224	0.52539	0.99543	FALSE	207.189	66.2982	1.6439	0.0019394
MD14G1110100_novel03	MD14G1110100	Novel_lncRNA	1652	2	{NA}	{NA}	{NA}	{NA}	{NA}	{XR_532094.2; PREDICTED: Malus x domestica uncharacterized LOC103455031 (LOC103455031), ncRNA}	{NA}	0.24	14.8133	31.69	23.83	14.5058	0	Inf	0.14368	0.45058	FALSE	26.0335	14.6989	0.82465	0.83311	1	FALSE	28.551	0	Inf	0.01293	0.086586	FALSE	16.582	12.9809	0.35323	0.96383	1	FALSE	18.5098	25.1444	-0.44195	0.83002	1	FALSE	18.1399	0	Inf	0.0023397
MD14G1112400_novel01	MD14G1112400	Novel_lncRNA	2003	2	{XP_008344322.1; PREDICTED: LOW QUALITY PROTEIN: isocitrate dehydrogenase [NADP], chloroplastic/mitochondrial-like [Malus domestica]}	{NA}	{pop:POPTR_0001s35080g; K00031 IDH1, IDH2, icd isocitrate dehydrogenase 1.1.1.42 ko01200; Metabolism; Global and overview maps; Carbon metabolism | ko01210; Metabolism; Global and overview maps; 2-Oxocarboxylic acid metabolism | ko01230; Metabolism; Global and overview maps; Biosynthesis of amino acids | ko00020; Metabolism; Carbohydrate metabolism; Citrate cycle (TCA cycle) | ko00720; Metabolism…	{NA}	{NA}	{XR_665235.2; PREDICTED: Pyrus x bretschneideri uncharacterized LOC103934184 (LOC103934184), transcript variant X1, ncRNA}	{NA}	227.99	203.69	239.41	250.357	250.978	171.371	0.55044	0.332	0.66793	FALSE	236.381	257.669	-0.12441	0.8475	1	FALSE	257.653	187.161	0.46115	0.28784	0.60551	FALSE	210.567	227.896	-0.1141	0.88398	1	FALSE	233.243	229.727	0.021915	0.95207	1	FALSE	228.143	164.053	0.47578	0.27697
MD14G1112500_novel03	MD14G1112500	Novel_lncRNA	368	2	{NA}	{NA}	{NA}	{NA}	{NA}	{XM_008365058.2; PREDICTED: Malus x domestica serine/threonine-protein phosphatase PP1-like (LOC103426982), mRNA}	{NA}	796.407	224.91	545.977	628.68	18.2411	39.7236	-1.1228	0.10476	0.38362	FALSE	37.4726	18.7125	1.0018	0.1585	1	FALSE	40.8392	43.4062	-0.087948	0.88935	0.9893	FALSE	37.0576	16.553	1.1627	0.12613	0.78339	FALSE	40.9873	36.4193	0.17047	0.86246	1	FALSE	40.1811	38.0404	0.078984	0.9912
MD14G1116400	MD14G1116400	Novel_lncRNA	312	3	{NA}	{NA}	{NA}	{NA}	{NA}	{NA}	{NA}	10.62	15.2867	0	0	0.645268	0.285508	1.1764	0.92075	1	FALSE	0	0.659428	#NAME?	0.46607	1	FALSE	0	0.314883	#NAME?	0.98254	1	FALSE	0	0.583436	#NAME?	0.64283	0.95614	FALSE	0	0	NA	NA	NA	NA	0	0.274144	#NAME?	1
MD14G1119900_novel02	MD14G1119900	Novel_lncRNA	292	1	{XP_020086735.1; ubiquitin-conjugating enzyme E2 10-like [Ananas comosus]}	{sp|P35133|UBC10_ARATH; Ubiquitin-conjugating enzyme E2 10 OS=Arabidopsis thaliana GN=UBC10 PE=1 SV=1}	{pxb:103943739; - - - - -}	{At5g53300; KOG0417 Ubiquitin-protein ligase O Posttranslational modification, protein turnover, chaperones ;}	{NA}	{XM_009337978.2; PREDICTED: Pyrus x bretschneideri ubiquitin-conjugating enzyme E2 10 (LOC103928874), mRNA}	{NA}	23441.6	17171.9	25249.8	28250.8	586.682	479.758	0.29027	0.60637	0.87762	FALSE	739.068	602.795	0.29404	0.60507	1	FALSE	806.012	523.777	0.62185	0.13767	0.41139	FALSE	715.399	533.253	0.42393	0.49036	0.91345	FALSE	790.067	717.398	0.1392	0.7612	1	FALSE	772.981	459.331	0.7509	0.12059
MD14G1122300	MD14G1122300	Novel_lncRNA	441	2	{NA}	{NA}	{NA}	{NA}	{NA}	{XR_528834.2; PREDICTED: Malus x domestica uncharacterized LOC103431133 (LOC103431133), ncRNA}	{NA}	1340.26	343.417	685.297	965.067	41.9451	108.049	-1.3651	0.032874	0.20349	FALSE	73.3392	42.9892	0.77061	0.24793	1	FALSE	79.8226	117.791	-0.56136	0.25263	0.56787	FALSE	89.4581	38.0453	1.2335	0.074113	0.66005	FALSE	98.6394	71.2835	0.4686	0.38696	0.98337	FALSE	96.5361	103.362	-0.09856	0.81415
MD14G1147100_novel01	MD14G1147100	Novel_lncRNA	247	1	{NA}	{NA}	{NA}	{NA}	{NA}	{XM_008353497.2; PREDICTED: Malus x domestica ethylene-responsive transcription factor ERF114-like (LOC103415143), mRNA}	{NA}	120.107	0	29.68	27.4267	0	0.940685	#NAME?	0.42668	0.75778	FALSE	0.293184	0	Inf	1	1	FALSE	0.317548	1.02091	-1.6848	0.68428	0.89375	FALSE	0.276872	0	Inf	0.98173	1	FALSE	0.305161	0.28309	0.10831	1	1	FALSE	0.294932	0.898379	-1.6069	0.84775
MD14G1150300_novel01	MD14G1150300	Novel_lncRNA	1350	1	{NA}	{NA}	{NA}	{NA}	{NA}	{XR_532079.2; PREDICTED: Malus x domestica uncharacterized LOC103454904 (LOC103454904), transcript variant X2, misc_RNA}	{NA}	109.237	221.703	188.093	143.54	196.843	51.9298	1.9224	0.28741	0.63004	FALSE	118.435	203.448	-0.78057	0.61296	1	FALSE	129.678	56.7586	1.192	0.329	0.64548	FALSE	75.1699	179.912	-1.2591	0.43268	0.90298	FALSE	83.0102	114.408	-0.46283	0.66633	1	FALSE	81.5029	49.7606	0.71185	0.41335
MD14G1152500_novel01	MD14G1152500	Novel_lncRNA	263	1	{NA}	{NA}	{NA}	{NA}	{NA}	{XR_525202.2; PREDICTED: Malus x domestica uncharacterized LOC103409643 (LOC103409643), ncRNA}	{NA}	33913.8	11851.5	16066.8	18934.7	224.047	392.801	-0.81	0.15824	0.4714	FALSE	271.521	229.923	0.23992	0.72881	1	FALSE	296.004	428.761	-0.53456	0.19216	0.50269	FALSE	280.511	203.43	0.46353	0.4972	0.9155	FALSE	309.211	263.516	0.2307	0.63459	1	FALSE	302.603	375.992	-0.31328	0.4742
MD14G1157900_novel06	MD14G1157900	Novel_lncRNA	216	1	{NA}	{NA}	{NA}	{NA}	{NA}	{XM_008394554.2; PREDICTED: Malus x domestica SNF1-related protein kinase regulatory subunit gamma-1 (LOC103454963), mRNA}	{NA}	3853.92	7790.81	3690.02	3032.65	37.3216	11.3577	1.7163	0.067844	0.31077	FALSE	16.3223	38.4513	-1.2362	0.18136	1	FALSE	17.8194	12.3953	0.52366	0.49491	0.77952	FALSE	11.6517	34.0037	-1.5452	0.11893	0.77959	FALSE	12.9236	15.8694	-0.29625	0.76633	1	FALSE	12.6329	10.8752	0.21615	0.76094
MD14G1158000_novel01	MD14G1158000	Novel_lncRNA	2497	4	{XP_008360753.2; PREDICTED: uncharacterized protein LOC103424448, partial [Malus domestica]}	{NA}	{pxb:103950018; - - - - -}	{NA}	{NA}	{XM_008394553.1; PREDICTED: Malus x domestica uncharacterized LOC103454962 (LOC103454962), mRNA}	{NA}	252.763	194.52	195.53	193.207	301.85	244.732	0.30263	0.55583	0.85895	FALSE	249.586	309.619	-0.31096	0.56308	1	FALSE	272.265	267.301	0.026546	0.96549	1	FALSE	207.551	273.854	-0.39994	0.48257	0.91345	FALSE	229.592	242.525	-0.079064	0.83484	1	FALSE	224.869	234.362	-0.059653	0.84858
MD14G1168000_novel01	MD14G1168000	Novel_lncRNA	1938	2	{NA}	{NA}	{NA}	{NA}	{NA}	{XR_666144.2; PREDICTED: Pyrus x bretschneideri uncharacterized LOC103939517 (LOC103939517), ncRNA}	{NA}	54.3567	16.6533	33.3333	27.9467	19.4817	39.4232	-1.0169	0.13464	0.44122	FALSE	30.5768	19.996	0.61273	0.40499	1	FALSE	33.2853	43.072	-0.37187	0.48734	0.77952	FALSE	22.376	17.687	0.33927	0.57279	0.93963	FALSE	24.6629	29.6395	-0.26518	0.82854	1	FALSE	24.021	37.7492	-0.65215	0.34292
MD14G1170100_novel02	MD14G1170100	Novel_lncRNA	262	1	{NA}	{NA}	{NA}	{NA}	{NA}	{XM_008369268.2; PREDICTED: Malus x domestica quinolinate synthase, chloroplastic-like (LOC103431122), mRNA}	{NA}	102.02	203.83	398.103	671.38	3.95682	1.21797	1.6999	0.30274	0.64591	FALSE	6.58597	4.06881	0.69479	0.58863	1	FALSE	7.19304	1.33612	2.4286	0.058003	0.2473	FALSE	9.87886	3.59866	1.4569	0.25512	0.85748	FALSE	11.0413	6.37098	0.79333	0.53032	1	FALSE	10.8814	1.16986	3.2175	0.067316
MD14G1180300_novel04	MD14G1180300	Novel_lncRNA	2109	1	{XP_008393031.1; PREDICTED: probable inactive poly [ADP-ribose] polymerase SRO5 [Malus domestica]}	{NA}	{mdm:103455219; - - - - -}	{NA}	{NA}	{EU427453.1; Malus x domestica cultivar Murray S42-RNase (S-RNase) gene, S-RNase-S42 allele, partial cds}	{NA}	11.4133	639.693	268.36	404.443	928.95	9.13793	6.6676	0.00015754	0.0047571	TRUE	295.942	955.419	-1.6908	0.14607	1	FALSE	323.852	9.98096	5.02	0.0023886	0.025248	TRUE	367.778	844.583	-1.1994	0.27026	0.8618	FALSE	410.764	287.575	0.51437	0.61905	1	FALSE	403.284	8.75062	5.5263	0.0011022
MD14G1185300_novel01	MD14G1185300	Novel_lncRNA	2262	3	{XP_008239720.1; PREDICTED: succinate dehydrogenase subunit 7A, mitochondrial [Prunus mume]}	{sp|Q9C5E8|SDH7A_ARATH; Succinate dehydrogenase subunit 7A, mitochondrial OS=Arabidopsis thaliana GN=SDH7A PE=1 SV=1}	{sot:102594987; - - - - -}	{NA}	{NA}	{XR_528837.2; PREDICTED: Malus x domestica uncharacterized LOC103431166 (LOC103431166), ncRNA}	{NA}	129.133	50.31	67.2733	113.4	69.6619	111.951	-0.68442	0.26982	0.61032	FALSE	75.1742	71.4366	0.073573	0.99248	1	FALSE	81.9709	122.262	-0.5768	0.18388	0.49099	FALSE	108.42	63.1845	0.77898	0.24203	0.85748	FALSE	119.61	72.872	0.7149	0.13022	0.7535	FALSE	117.036	107.205	0.12658	0.79571
MD14G1191300_novel01	MD14G1191300	Novel_lncRNA	1497	4	{NA}	{NA}	{NA}	{NA}	{NA}	{XR_526180.2; PREDICTED: Malus x domestica uncharacterized LOC103415257 (LOC103415257), ncRNA}	{NA}	7.46	11.2067	6.66	9.49667	10.612	4.04003	1.3933	0.27604	0.61949	FALSE	4.49921	10.9404	-1.2819	0.36026	1	FALSE	4.89227	4.39885	0.15338	0.88165	0.98828	FALSE	6.13759	9.67356	-0.65637	0.59234	0.94374	FALSE	6.86598	4.38107	0.64818	0.72503	1	FALSE	6.76286	3.865	0.80717	0.58199
MD14G1191300_novel02	MD14G1191300	Novel_lncRNA	751	4	{NA}	{NA}	{NA}	{NA}	{NA}	{XR_526180.2; PREDICTED: Malus x domestica uncharacterized LOC103415257 (LOC103415257), ncRNA}	{NA}	6.28667	8.44667	6.04333	10.6633	3.12315	1.25594	1.3142	0.43432	0.76424	FALSE	1.79403	3.20225	-0.83588	0.4915	1	FALSE	1.97448	1.37442	0.52265	1	1	FALSE	2.45971	2.83068	-0.20266	0.93228	1	FALSE	2.75552	1.72812	0.67312	0.72715	1	FALSE	2.71087	1.2065	1.1679	0.55556
MD14G1191300_novel03	MD14G1191300	Novel_lncRNA	726	3	{NA}	{NA}	{NA}	{NA}	{NA}	{XR_526180.2; PREDICTED: Malus x domestica uncharacterized LOC103415257 (LOC103415257), ncRNA}	{NA}	240.583	123.267	171.933	155.58	39.8451	49.1191	-0.30188	0.69085	0.93023	FALSE	45.463	40.8438	0.15458	0.89798	1	FALSE	49.5425	53.6556	-0.11506	0.80431	0.94637	FALSE	35.6404	36.1273	-0.019574	0.89369	1	FALSE	39.4923	44.0839	-0.15868	0.73733	1	FALSE	38.7253	47.0448	-0.28076	0.52981
MD14G1202600_novel02	MD14G1202600	Novel_lncRNA	388	1	{XP_008393173.1; PREDICTED: thioredoxin-like 1-2, chloroplastic [Malus domestica]}	{NA}	{mdm:103455366; - - - - -}	{NA}	{NA}	{XM_008353629.2; PREDICTED: Malus x domestica thioredoxin-like 1-2, chloroplastic (LOC103415280), mRNA}	{NA}	1025.58	3908.97	3557.54	8933.33	398.634	60.6074	2.7175	0.00076524	0.015093	TRUE	295.494	409.258	-0.46988	0.44621	1	FALSE	323.136	66.0145	2.2913	0.013372	0.088613	FALSE	616.99	361.821	0.76997	0.24949	0.85748	FALSE	685.839	286.77	1.258	0.028534	0.5962	FALSE	673.109	58.0146	3.5364	6.9881e-07
MD14G1217200_novel02	MD14G1217200	Novel_lncRNA	266	1	{NA}	{NA}	{NA}	{NA}	{NA}	{XM_008353650.2; PREDICTED: Malus x domestica phosphatidylinositol 4-kinase gamma 5-like (LOC103415306), mRNA}	{NA}	301.77	184.087	74.5333	102.813	3.82161	3.70168	0.046003	1	1	FALSE	1.47605	3.92115	-1.4095	0.34091	1	FALSE	1.61374	4.02636	-1.3191	0.35538	0.66999	FALSE	1.64516	3.46772	-1.0758	0.52515	0.93142	FALSE	1.8355	1.43798	0.35213	0.96112	1	FALSE	1.79783	3.53722	-0.97636	0.53494
MD14G1226200_novel01	MD14G1226200	Novel_lncRNA	253	1	{XP_009360187.1; PREDICTED: uncharacterized protein LOC103950685 [Pyrus x bretschneideri]}	{NA}	{NA}	{NA}	{NA}	{XM_008395175.1; PREDICTED: Malus x domestica uncharacterized LOC103455595 (LOC103455595), mRNA}	{NA}	3804.03	8462.69	5521.32	5742.88	138.001	38.066	1.8581	0.13907	0.44373	FALSE	74.9537	142.262	-0.92448	0.37653	1	FALSE	81.8791	41.603	0.97681	0.23439	0.54806	FALSE	67.9621	125.795	-0.88828	0.37846	0.88797	FALSE	75.3478	72.5808	0.053978	0.93774	1	FALSE	73.9398	36.5387	1.0169	0.16721
MD14G1239700_novel01	MD14G1239700	Novel_lncRNA	225	1	{NA}	{NA}	{NA}	{NA}	{NA}	{XM_008369390.2; PREDICTED: Malus x domestica uncharacterized LOC103431253 (LOC103431253), mRNA}	{NA}	4303.48	2014.55	2388.84	3007.87	12.997	17.8387	-0.45684	0.58376	0.87366	FALSE	14.6829	13.3489	0.13742	0.99476	1	FALSE	16.069	19.506	-0.27963	0.61502	0.85781	FALSE	15.9	11.8082	0.42924	0.66376	0.95614	FALSE	17.618	14.2095	0.3102	0.66254	1	FALSE	17.2841	17.1058	0.014956	0.98637
MD15G1000900_novel02	MD15G1000900	Novel_lncRNA	277	1	{NA}	{NA}	{NA}	{NA}	{NA}	{XM_008389653.2; PREDICTED: Malus x domestica F-box protein SKIP31 (LOC103450321), mRNA}	{NA}	137.07	94.9667	85.5367	94.63	2.58427	2.18175	0.24427	1	1	FALSE	2.02204	2.66177	-0.39657	0.95464	1	FALSE	2.20593	2.37601	-0.10715	1	1	FALSE	1.90596	2.35445	-0.30487	0.90338	1	FALSE	2.14519	1.96998	0.12293	1	1	FALSE	2.121	2.08789	0.022699	1
MD15G1004400_novel04	MD15G1004400	Novel_lncRNA	330	1	{NA}	{NA}	{NA}	{NA}	{NA}	{XM_008389665.2; PREDICTED: Malus x domestica L-ascorbate oxidase homolog (LOC103450334), mRNA}	{NA}	5702.89	1206.52	1448.19	2871.06	72.4673	198.955	-1.457	0.0092393	0.084948	FALSE	69.8101	74.6224	-0.096173	0.9994	1	FALSE	76.0646	217.417	-1.5152	0.0010514	0.014306	TRUE	118.806	66.005	0.84796	0.16249	0.81275	FALSE	131.148	67.8772	0.9502	0.066229	0.64311	FALSE	128.488	190.644	-0.56925	0.17407
MD15G1004900_novel09	MD15G1004900	Novel_lncRNA	279	2	{XP_008350482.1; PREDICTED: prolyl endopeptidase-like [Malus domestica]}	{NA}	{pmum:103321175; K01322 PREP prolyl oligopeptidase 3.4.21.26 ko04614; Organismal Systems; Endocrine system; Renin-angiotensin system}	{At1g76140; KOG2237 Predicted serine protease O Posttranslational modification, protein turnover, chaperones ;}	{NA}	{XM_008352260.2; PREDICTED: Malus x domestica prolyl endopeptidase-like (LOC103413820), mRNA}	{NA}	4807.15	1725.77	2043.28	3665.4	45.8428	78.7957	-0.78142	0.21754	0.53913	FALSE	47.0867	47.0359	0.0015593	0.98936	1	FALSE	51.2932	86.0907	-0.74709	0.1239	0.39033	FALSE	74.7053	41.6103	0.84427	0.23394	0.85576	FALSE	82.5791	45.7167	0.85306	0.12231	0.73923	FALSE	80.9615	75.4838	0.10107	0.932
MD15G1020900_novel01	MD15G1020900	Novel_lncRNA	222	1	{NA}	{NA}	{NA}	{NA}	{NA}	{XM_008389782.2; PREDICTED: Malus x domestica thioredoxin H1-like (LOC103450437), mRNA}	{NA}	3131.82	1461.64	3083.15	4040.92	8.58773	11.4798	-0.41875	0.66378	0.91314	FALSE	16.1947	8.82577	0.87572	0.32622	1	FALSE	17.6734	12.5098	0.49851	0.56847	0.82342	FALSE	19.2886	7.8045	1.3054	0.14452	0.79986	FALSE	21.453	15.6638	0.45375	0.59093	1	FALSE	21.0978	10.9877	0.9412	0.24625
MD15G1038700_novel01	MD15G1038700	Novel_lncRNA	2502	2	{NA}	{NA}	{NA}	{NA}	{NA}	{XR_001790598.1; PREDICTED: Malus x domestica uncharacterized LOC103440737 (LOC103440737), transcript variant X1, ncRNA}	{NA}	3.08333	0.71	3.46667	1.03667	1.21172	2.94746	-1.2824	0.40435	0.7424	FALSE	4.37719	1.25472	1.8026	0.20723	1	FALSE	4.78106	3.22476	0.56814	0.76603	0.93577	FALSE	1.10749	1.11024	-0.0035774	0.96883	1	FALSE	1.22064	4.23593	-1.795	0.34919	0.97406	FALSE	1.17973	2.82005	-1.2573	0.59498
MD15G1039500_novel01	MD15G1039500	Novel_lncRNA	307	1	{NA}	{NA}	{NA}	{NA}	{NA}	{XM_008367330.2; PREDICTED: Malus x domestica probable WRKY transcription factor 60 (LOC103429191), mRNA}	{NA}	34.2733	0	0	0	0	0.970436	#NAME?	0.5927	0.87704	FALSE	0	0	NA	NA	NA	NA	0	1.05953	#NAME?	0.55258	0.81423	FALSE	0	0	NA	NA	NA	NA	0	0	NA	NA	NA	NA	0	0.932356	#NAME?	0.61222
MD15G1072200_novel01	MD15G1072200	Novel_lncRNA	1007	2	{XP_007221742.1; hypothetical protein PRUPE_ppb022435mg [Prunus persica]}	{sp|Q680P8|RS29_ARATH; 40S ribosomal protein S29 OS=Arabidopsis thaliana GN=RPS29A PE=3 SV=2}	{pxb:103950943; K02980 RP-S29e, RPS29 small subunit ribosomal protein S29e - ko03010; Genetic Information Processing; Translation; Ribosome}	{At3g43980; KOG3506 40S ribosomal protein S29 J Translation, ribosomal structure and biogenesis ;}	{NA}	{XR_526205.2; PREDICTED: Malus x domestica uncharacterized LOC103415421 (LOC103415421), ncRNA}	{NA}	445.857	105.157	233.987	146.493	51.7433	145.25	-1.4891	0.014883	0.12344	FALSE	97.6403	53.0958	0.87888	0.1747	1	FALSE	106.346	158.699	-0.57754	0.19994	0.50942	FALSE	53.014	46.9868	0.17412	0.81324	1	FALSE	58.5588	94.7311	-0.69395	0.17538	0.85486	FALSE	57.2578	139.157	-1.2812	0.006097
MD15G1078900_novel01	MD15G1078900	Novel_lncRNA	298	1	{NA}	{NA}	{NA}	{NA}	{NA}	{XM_009361637.2; PREDICTED: Pyrus x bretschneideri ethylene-responsive transcription factor ERF011 (LOC103950435), mRNA}	{NA}	5254.08	3110.61	3969.23	6602.2	121.776	120.375	0.016693	0.94602	1	FALSE	127.146	125.462	0.019232	0.86103	1	FALSE	138.621	131.246	0.078864	0.83558	0.96541	FALSE	182.587	110.987	0.71819	0.22783	0.85432	FALSE	201.379	123.464	0.70582	0.21276	0.88073	FALSE	197.322	115.258	0.77568	0.2081
MD15G1082400_novel01	MD15G1082400	Novel_lncRNA	300	1	{NA}	{NA}	{NA}	{NA}	{NA}	{XM_008353773.2; PREDICTED: Malus x domestica coenzyme Q-binding protein COQ10 homolog, mitochondrial-like (LOC103415440), mRNA}	{NA}	576.673	40.3233	92.1933	252.417	1.39693	13.5543	-3.2784	0.0050057	0.055149	FALSE	2.83552	1.4378	0.97975	0.67554	1	FALSE	3.08998	14.7906	-2.259	0.012503	0.084928	FALSE	7.08922	1.27408	2.4762	0.23836	0.85748	FALSE	7.75627	2.73541	1.5036	0.35384	0.97406	FALSE	7.58202	12.98	-0.77564	0.35468
MD15G1083000_novel01	MD15G1083000	Novel_lncRNA	453	1	{NA}	{NA}	{NA}	{NA}	{NA}	{XM_017326876.1; PREDICTED: Malus x domestica peroxisomal multifunctional enzyme A-like (LOC103415442), transcript variant X1, mRNA}	{NA}	1691.7	1054.12	783.82	666.513	146.854	145.768	0.010704	0.96155	1	FALSE	91.0954	150.651	-0.72576	0.21739	1	FALSE	99.3088	159.335	-0.68207	0.12998	0.40001	FALSE	65.9594	133.257	-1.0146	0.092796	0.71163	FALSE	72.9339	88.5275	-0.27954	0.51997	0.99253	FALSE	71.4588	139.636	-0.96649	0.026436
MD15G1088300_novel01	MD15G1088300	Novel_lncRNA	2262	1	{XP_008393843.1; PREDICTED: uncharacterized protein LOC103455999 isoform X2 [Malus domestica]}	{NA}	{NA}	{NA}	{NA}	{XM_017322749.1; PREDICTED: Malus x domestica uncharacterized LOC103455999 (LOC103455999), transcript variant X4, mRNA}	{NA}	24.61	0.386667	2.14333	5	0.349232	20.8698	-5.9011	0.0029916	0.038481	TRUE	2.3556	0.359449	2.7122	0.23265	1	FALSE	2.56638	22.7828	-3.1501	0.024332	0.13563	FALSE	4.76355	0.31852	3.9026	0.37895	0.88797	FALSE	5.18067	2.28725	1.1795	0.65416	1	FALSE	5.06116	19.9512	-1.9789	0.14142
MD15G1088300_novel02	MD15G1088300	Novel_lncRNA	1664	3	{XP_008393842.1; PREDICTED: uncharacterized protein LOC103455999 isoform X1 [Malus domestica]}	{NA}	{NA}	{NA}	{NA}	{XM_017322749.1; PREDICTED: Malus x domestica uncharacterized LOC103455999 (LOC103455999), transcript variant X4, mRNA}	{NA}	139	4.62	4.26	20.9767	4.03119	84.2078	-4.3847	3.5706e-07	2.4017e-05	TRUE	3.3416	4.13498	-0.30734	0.88907	1	FALSE	3.63053	91.8151	-4.6605	5.4576e-08	2.7921e-06	TRUE	13.7311	3.66143	1.907	0.19211	0.83251	FALSE	15.0333	3.25454	2.2076	0.12377	0.73923	FALSE	14.6695	80.5303	-2.4567	0.00057623
MD15G1096900_novel07	MD15G1096900	Novel_lncRNA	467	1	{NA}	{NA}	{pmum:103320184; K14454 GOT1 aspartate aminotransferase, cytoplasmic 2.6.1.1 ko01200; Metabolism; Global and overview maps; Carbon metabolism | ko01210; Metabolism; Global and overview maps; 2-Oxocarboxylic acid metabolism | ko01230; Metabolism; Global and overview maps; Biosynthesis of amino acids | ko00710; Metabolism; Energy metabolism; Carbon fixation in photosynthetic organisms | ko00250; Me…	{NA}	{NA}	{XM_008362813.2; PREDICTED: Malus x domestica aspartate aminotransferase, cytoplasmic (LOC103424713), mRNA}	{NA}	7930.41	17098	15862.8	25504.2	2752.32	737.635	1.8997	0.0060111	0.061953	FALSE	1994.08	2830.77	-0.50547	0.38723	1	FALSE	2178.03	805.969	1.4342	0.0039311	0.035659	TRUE	2713.07	2503.16	0.11617	0.84948	1	FALSE	3009.63	1934.19	0.63785	0.24272	0.90894	FALSE	2952	706.947	2.062	0.00023491
MD15G1099300_novel15	MD15G1099300	Novel_lncRNA	589	2	{NA}	{NA}	{NA}	{NA}	{NA}	{XM_009340437.2; PREDICTED: Pyrus x bretschneideri uncharacterized LOC103931029 (LOC103931029), transcript variant X1, mRNA}	{NA}	919.88	226.573	402.393	753.437	49.8863	133.014	-1.4149	0.021998	0.15619	FALSE	75.6352	51.1816	0.56343	0.41858	1	FALSE	82.4163	145.134	-0.81638	0.068737	0.28007	FALSE	122.75	45.2932	1.4384	0.032108	0.43025	FALSE	135.511	73.339	0.88575	0.071579	0.64828	FALSE	132.712	127.331	0.05971	0.94356
MD15G1112300	MD15G1112300	Novel_lncRNA	1342	6	{XP_010044390.1; PREDICTED: ubiquinone biosynthesis protein COQ4 homolog, mitochondrial isoform X1 [Eucalyptus grandis]}	{sp|Q9ZPR0|COQ4_ARATH; Ubiquinone biosynthesis protein COQ4 homolog, mitochondrial OS=Arabidopsis thaliana GN=At2g03690 PE=2 SV=1}	{egr:104433371; K18586 COQ4 ubiquinone biosynthesis protein COQ4 - -}	{At2g03690; KOG3244 Protein involved in ubiquinone biosynthesis H Coenzyme transport and metabolism ;}	{NA}	{XR_524094.2; PREDICTED: Malus x domestica serine/threonine-protein kinase prpf4B-like (LOC103402716), transcript variant X1, misc_RNA}	{NA}	62.0567	84.06	88.4	74.55	62.0403	29.3496	1.0799	0.066327	0.30917	FALSE	54.5538	63.4987	-0.21905	0.65728	1	FALSE	59.4737	32.0223	0.89317	0.081173	0.29495	FALSE	39.0957	56.157	-0.52246	0.41553	0.90298	FALSE	43.3778	53.0568	-0.29058	0.64888	1	FALSE	42.3793	28.0906	0.59327	0.2765
MD15G1112300_novel01	MD15G1112300	Novel_lncRNA	1459	6	{XP_010044391.1; PREDICTED: ubiquinone biosynthesis protein COQ4 homolog, mitochondrial isoform X2 [Eucalyptus grandis]}	{sp|Q9ZPR0|COQ4_ARATH; Ubiquinone biosynthesis protein COQ4 homolog, mitochondrial OS=Arabidopsis thaliana GN=At2g03690 PE=2 SV=1}	{egr:104433371; K18586 COQ4 ubiquinone biosynthesis protein COQ4 - -}	{At2g03690; KOG3244 Protein involved in ubiquinone biosynthesis H Coenzyme transport and metabolism ;}	{NA}	{XR_524094.2; PREDICTED: Malus x domestica serine/threonine-protein kinase prpf4B-like (LOC103402716), transcript variant X1, misc_RNA}	{NA}	58.8967	51.41	59.7267	43.08	46.1709	30.3614	0.60475	0.44891	0.77907	FALSE	40.8147	47.5764	-0.22116	0.90038	1	FALSE	44.4609	33.2551	0.41896	0.43387	0.73208	FALSE	25.0056	42.0823	-0.75096	0.4522	0.90355	FALSE	27.6144	39.6951	-0.52354	0.47263	0.98512	FALSE	26.8938	29.1075	-0.11412	1
MD15G1112400_novel03	MD15G1112400	Novel_lncRNA	3194	11	{XP_008378066.1; PREDICTED: uncharacterized protein LOC103441142 [Malus domestica]}	{NA}	{pmum:103320256; - - - - -}	{At4g15940; KOG1535 Predicted fumarylacetoacetate hydralase R General function prediction only ;}	{NA}	{XR_532239.2; PREDICTED: Malus x domestica uncharacterized LOC103456129 (LOC103456129), transcript variant X2, ncRNA}	{NA}	172.413	61.56	107.577	85.12	118.121	219.065	-0.8911	0.13883	0.44373	FALSE	173.547	121.092	0.51922	0.42587	1	FALSE	188.905	239.521	-0.34249	0.44611	0.7439	FALSE	119.094	107.145	0.15253	0.82897	1	FALSE	131.428	168.461	-0.35814	0.48228	0.98512	FALSE	128.396	209.898	-0.70909	0.12905
MD15G1134900_novel02	MD15G1134900	Novel_lncRNA	557	2	{NA}	{NA}	{NA}	{NA}	{NA}	{XM_008369496.2; PREDICTED: Malus x domestica F-box protein At5g39450-like (LOC103431348), mRNA}	{NA}	609.917	72.74	226.74	409.663	14.4144	80.1291	-2.4748	0.0004483	0.010425	TRUE	38.8215	14.7172	1.3994	0.076928	1	FALSE	42.2981	87.359	-1.0464	0.034011	0.16606	FALSE	60.8095	13.017	2.2239	0.004728	0.1468	FALSE	67.2701	37.6729	0.83644	0.15468	0.81964	FALSE	66.0165	76.706	-0.21651	0.56062
MD15G1140200_novel07	MD15G1140200	Novel_lncRNA	340	1	{NA}	{NA}	{NA}	{NA}	{NA}	{XM_008395998.2; PREDICTED: Malus x domestica cleft lip and palate transmembrane protein 1 homolog (LOC103456303), mRNA}	{NA}	9915.94	4610.94	5251.33	7793.84	299.762	384.27	-0.3583	0.50858	0.81624	FALSE	278.154	307.936	-0.14675	0.81564	1	FALSE	303.196	419.68	-0.46904	0.26123	0.57425	FALSE	358.625	272.357	0.39698	0.55918	0.93548	FALSE	396.515	269.969	0.55458	0.28451	0.94861	FALSE	388.675	368.074	0.078566	0.94671
MD15G1142000_novel03	MD15G1142000	Novel_lncRNA	1586	2	{NA}	{NA}	{NA}	{At5g09550; KOG1439 RAB proteins geranylgeranyltransferase component A (RAB escort protein) O Posttranslational modification, protein turnover, chaperones ;}	{NA}	{XM_008396026.2; PREDICTED: Malus x domestica guanosine nucleotide diphosphate dissociation inhibitor 2 (LOC103456321), mRNA}	{NA}	528.623	152.517	278.953	293.833	135.598	306.018	-1.1743	0.040062	0.22358	FALSE	207.405	139.373	0.5735	0.35324	1	FALSE	226.198	334.158	-0.56295	0.17531	0.47305	FALSE	185.677	123.337	0.59019	0.32825	0.87237	FALSE	204.34	201.032	0.023545	0.8843	1	FALSE	199.707	293.235	-0.55417	0.27438
MD15G1153500_novel02	MD15G1153500	Novel_lncRNA	284	1	{NA}	{NA}	{pxb:103949085; - - - - -}	{NA}	{NA}	{XM_008362973.2; PREDICTED: Malus x domestica CBL-interacting serine/threonine-protein kinase 6-like (LOC103424886), partial mRNA}	{NA}	3771.68	1687.63	4749.32	8302.47	47.5279	66.647	-0.48776	0.54087	0.84918	FALSE	123.231	48.5731	1.3431	0.058382	1	FALSE	134.599	72.736	0.88793	0.07318	0.28498	FALSE	184.16	42.9591	2.0999	0.002494	0.11339	FALSE	203.143	119.424	0.7664	0.10339	0.71555	FALSE	198.921	63.7822	1.641	0.002176
MD15G1162100_novel04	MD15G1162100	Novel_lncRNA	262	1	{NA}	{NA}	{NA}	{NA}	{NA}	{XM_008340361.2; PREDICTED: Malus x domestica NEDD8 ultimate buster 1 (LOC103401647), mRNA}	{NA}	8228.15	5519.86	6022.19	6435.55	103.712	94.4492	0.13497	0.7827	0.97188	FALSE	100.082	106.366	-0.087843	0.85627	1	FALSE	109.094	103.161	0.080668	0.86038	0.97729	FALSE	93.7943	94.0693	-0.0042242	0.91285	1	FALSE	103.914	97.2032	0.096312	0.9415	1	FALSE	101.907	90.4641	0.17184	0.80488
MD15G1197800_novel03	MD15G1197800	Novel_lncRNA	1194	1	{XP_018499647.1; PREDICTED: uncharacterized protein LOC103933845 [Pyrus x bretschneideri]}	{NA}	{NA}	{NA}	{NA}	{XR_526291.2; PREDICTED: Malus x domestica uncharacterized LOC103415836 (LOC103415836), ncRNA}	{NA}	1707.02	676.483	1030.75	926.807	421.453	691.981	-0.71536	0.20909	0.5374	FALSE	546.665	432.403	0.33828	0.55896	1	FALSE	595.38	755.959	-0.3445	0.44472	0.7439	FALSE	419.307	382.599	0.13218	0.85085	1	FALSE	463.867	531.836	-0.19727	0.66262	1	FALSE	453.692	662.696	-0.54663	0.26355
MD15G1197800_novel04	MD15G1197800	Novel_lncRNA	1205	2	{NA}	{NA}	{NA}	{NA}	{NA}	{XR_523785.2; PREDICTED: Malus x domestica uncharacterized LOC103400726 (LOC103400726), ncRNA}	{NA}	185.05	77.7567	71.2533	87.51	54.5953	76.1652	-0.48036	0.33351	0.66793	FALSE	37.4835	56.3021	-0.58693	0.5087	1	FALSE	40.7866	83.2869	-1.03	0.042453	0.19745	FALSE	40.1768	49.8065	-0.30997	0.79081	1	FALSE	44.5059	36.4285	0.28893	0.63801	1	FALSE	43.5396	72.9959	-0.74549	0.13345
MD15G1201800_novel01	MD15G1201800	Novel_lncRNA	809	1	{ONH97878.1; hypothetical protein PRUPE_7G215700 [Prunus persica]}	{NA}	{fve:101305588; - - - - -}	{NA}	{NA}	{XR_666791.1; PREDICTED: Pyrus x bretschneideri uncharacterized LOC103943942 (LOC103943942), ncRNA}	{NA}	55.7833	9.19	24.51	15.9533	3.796	13.2736	-1.806	0.053866	0.27103	FALSE	7.74404	3.91649	0.98352	0.32421	1	FALSE	8.44604	14.5032	-0.78003	0.32671	0.64548	FALSE	4.31108	3.46469	0.31532	0.78676	1	FALSE	4.78114	7.51882	-0.65315	0.56215	1	FALSE	4.6802	12.7065	-1.4409	0.097146
MD15G1215000_novel01	MD15G1215000	Novel_lncRNA	2261	1	{NA}	{NA}	{NA}	{NA}	{NA}	{XM_008339546.2; PREDICTED: Malus x domestica protein ELF4-LIKE 3 (LOC103400861), transcript variant X2, mRNA}	{NA}	91.7333	12.34	26.84	37.3433	16.6789	79.2325	-2.2481	0.00067831	0.014211	TRUE	29.1824	17.1244	0.76904	0.28659	1	FALSE	31.7398	86.4471	-1.4455	0.0042555	0.038061	TRUE	35.4585	15.1511	1.2267	0.09029	0.71163	FALSE	39.0083	28.3125	0.46234	0.46362	0.98512	FALSE	38.1281	75.8183	-0.99169	0.046942
MD15G1221700_novel03	MD15G1221700	Novel_lncRNA	272	1	{NA}	{NA}	{NA}	{NA}	{NA}	{XM_017322659.1; PREDICTED: Malus x domestica uncharacterized LOC103400908 (LOC103400908), transcript variant X2, mRNA}	{NA}	901.89	387.37	436.35	441.007	8.85299	12.5326	-0.50145	0.67563	0.91956	FALSE	8.94202	9.04688	-0.016819	0.92057	1	FALSE	9.75068	13.6535	-0.48569	0.5525	0.81423	FALSE	7.84402	7.99813	-0.028069	0.91063	1	FALSE	8.63647	8.67954	-0.0071761	1	1	FALSE	8.4569	11.9824	-0.50271	0.52909
MD15G1226600_novel02	MD15G1226600	Novel_lncRNA	889	1	{NA}	{NA}	{NA}	{NA}	{NA}	{XM_008367599.2; PREDICTED: Malus x domestica anthranilate N-methyltransferase-like (LOC103429450), mRNA}	{NA}	375.977	248.317	263.18	337.773	109.19	102.809	0.086869	0.77237	0.96964	FALSE	95.7201	111.693	-0.22264	0.55597	1	FALSE	104.531	112.222	-0.10243	0.73776	0.9201	FALSE	104.038	98.7609	0.075094	0.96049	1	FALSE	115.288	92.8126	0.31285	0.51392	0.99242	FALSE	112.999	98.417	0.19933	0.73238
MD15G1230900_novel05	MD15G1230900	Novel_lncRNA	1368	1	{XP_008361941.1; PREDICTED: uncharacterized protein LOC103425631 [Malus domestica]}	{NA}	{NA}	{NA}	{NA}	{AJ291492.1; Malus domestica retrotransposon dem 1 including ORF1 for hypothetical protein}	{NA}	259.79	207.033	224.967	247.493	163.059	124.546	0.38872	0.51115	0.81624	FALSE	142.76	167.502	-0.23058	0.75232	1	FALSE	155.598	135.941	0.19484	0.62571	0.86705	FALSE	132.705	148.157	-0.1589	0.8397	1	FALSE	146.956	138.915	0.081178	0.88471	1	FALSE	143.756	119.207	0.27015	0.53172
MD15G1231500_novel02	MD15G1231500	Novel_lncRNA	412	3	{NA}	{NA}	{NA}	{NA}	{NA}	{XM_008363108.2; PREDICTED: Malus x domestica high mobility group B protein 3-like (LOC103425027), mRNA}	{NA}	21795.4	17034.9	21913.3	21819	1926.79	1502.42	0.35891	0.51971	0.82405	FALSE	2001.35	1979.78	0.01563	0.96323	1	FALSE	2180.67	1640.66	0.4105	0.31473	0.63493	FALSE	1723.13	1751.33	-0.023419	0.99749	1	FALSE	1898.72	1941.88	-0.032427	0.97237	1	FALSE	1856.56	1439.04	0.36753	0.46497
MD15G1252900_novel02	MD15G1252900	Novel_lncRNA	1354	11	{NA}	{NA}	{NA}	{NA}	{GO:0006355; regulation of transcription, DNA-dependent; biological_process}	{XR_666644.2; PREDICTED: Pyrus x bretschneideri uncharacterized LOC103942420 (LOC103942420), transcript variant X13, misc_RNA}	{PF04504:Protein of unknown function, DUF573}	225.6	181.62	145.193	125.633	148.613	106.808	0.47654	0.52292	0.8275	FALSE	88.5965	153.184	-0.78994	0.28355	1	FALSE	96.5357	116.698	-0.27364	0.52658	0.79738	FALSE	66.4488	135.495	-1.0279	0.2231	0.84967	FALSE	73.4617	85.9515	-0.22653	0.7711	1	FALSE	71.6898	102.279	-0.51267	0.33104
MD15G1252900_novel05	MD15G1252900	Novel_lncRNA	991	11	{XP_008382443.1; PREDICTED: delta-aminolevulinic acid dehydratase, chloroplastic-like [Malus domestica]}	{sp|P30124|HEM2_PEA; Delta-aminolevulinic acid dehydratase, chloroplastic (Fragment) OS=Pisum sativum GN=HEMB PE=1 SV=1}	{mdm:103445227; K01698 hemB, ALAD porphobilinogen synthase 4.2.1.24 ko00860; Metabolism; Metabolism of cofactors and vitamins; Porphyrin and chlorophyll metabolism}	{NA}	{GO:0006355; regulation of transcription, DNA-dependent; biological_process}	{XR_666644.2; PREDICTED: Pyrus x bretschneideri uncharacterized LOC103942420 (LOC103942420), transcript variant X13, misc_RNA}	{PF04504:Protein of unknown function, DUF573}	100.583	132.217	103.093	90.94	74.4812	32.124	1.2132	0.19034	0.51647	FALSE	42.6362	76.7763	-0.84858	0.33111	1	FALSE	46.5048	35.1545	0.40367	0.51861	0.7938	FALSE	32.2273	67.9002	-1.0751	0.28324	0.86303	FALSE	35.6554	41.3071	-0.21227	0.85879	1	FALSE	34.8078	30.7937	0.17677	0.68481
MD15G1253700_novel01	MD15G1253700	Novel_lncRNA	883	1	{NA}	{NA}	{NA}	{NA}	{NA}	{XM_008356436.2; PREDICTED: Malus x domestica mitogen-activated protein kinase 7 (LOC103418305), transcript variant X2, mRNA}	{NA}	51.29	215.217	240.02	188.103	88.6701	13.985	2.6646	0.0024523	0.03299	TRUE	86.4687	90.7746	-0.070109	0.79147	1	FALSE	94.3317	15.239	2.63	8.3322e-07	3.5523e-05	TRUE	56.8244	80.3077	-0.49903	0.35777	0.88503	FALSE	62.6975	83.9967	-0.42192	0.39472	0.98512	FALSE	61.367	13.3864	2.1967	9.2988e-05
MD15G1253700_novel06	MD15G1253700	Novel_lncRNA	376	1	{XP_008354658.1; PREDICTED: mitogen-activated protein kinase 7 [Malus domestica]}	{NA}	{NA}	{At2g18170; KOG0660 Mitogen-activated protein kinase T Signal transduction mechanisms ;}	{NA}	{XM_008356436.2; PREDICTED: Malus x domestica mitogen-activated protein kinase 7 (LOC103418305), transcript variant X2, mRNA}	{NA}	1936.04	2584.72	5396.76	7771.94	210.678	103.76	1.0218	0.18283	0.50467	FALSE	393.217	215.568	0.86718	0.18765	1	FALSE	428.519	113.247	1.9199	1.212e-05	0.00033203	TRUE	486.181	190.732	1.3499	0.057102	0.58973	FALSE	537.251	382.107	0.49162	0.36839	0.97671	FALSE	526.514	99.357	2.4058	1.4092e-06
MD15G1255000_novel01	MD15G1255000	Novel_lncRNA	2466	1	{NA}	{NA}	{NA}	{NA}	{NA}	{AB270792.1; Malus x domestica MdSFBB9-alpha, S9-RNase, MdSFBB9-beta genes, complete cds, Psi-SFBB9-alpha, Psi-SFBB9-beta pseudogenes}	{NA}	72.5467	11.6933	25.9933	16.08	18.0291	69.2548	-1.9416	0.0025953	0.03455	TRUE	31.048	18.5509	0.74301	0.25522	1	FALSE	33.7566	75.6204	-1.1636	0.024136	0.1354	FALSE	16.8116	16.413	0.03462	0.92933	1	FALSE	18.489	30.1291	-0.70449	0.30579	0.95378	FALSE	18.0653	66.3115	-1.876	0.00066562
MD15G1262700	MD15G1262700	Novel_lncRNA	1003	3	{XP_007223527.1; hypothetical protein PRUPE_ppa014497mg [Prunus persica]}	{NA}	{NA}	{NA}	{NA}	{XR_523847.2; PREDICTED: Malus x domestica uncharacterized LOC103401160 (LOC103401160), ncRNA}	{NA}	21738	8701.09	13687	15418.1	4591.05	7023.55	-0.61338	0.29117	0.63284	FALSE	5790.28	4714.65	0.29648	0.6105	1	FALSE	6313.67	7679.29	-0.28249	0.49459	0.77952	FALSE	5559.03	4170.12	0.41474	0.5316	0.93142	FALSE	6144.83	5620.65	0.12864	0.80814	1	FALSE	6012.95	6728.93	-0.16231	0.78314
MD15G1262700_novel02	MD15G1262700	Novel_lncRNA	1204	1	{NA}	{NA}	{NA}	{NA}	{NA}	{XR_523847.2; PREDICTED: Malus x domestica uncharacterized LOC103401160 (LOC103401160), ncRNA}	{NA}	13927.2	4902.91	9310.29	11136.3	3193.72	5706.64	-0.8374	0.1623	0.47791	FALSE	4969.03	3275.19	0.60138	0.32827	1	FALSE	5417.21	6238.18	-0.20357	0.60952	0.85274	FALSE	5082.8	2897.03	0.81105	0.25565	0.85748	FALSE	5619.01	4822.74	0.22047	0.71235	1	FALSE	5502.8	5466.61	0.0095203	0.9719
MD15G1279400_novel01	MD15G1279400	Novel_lncRNA	1059	2	{XP_009375733.1; PREDICTED: gamma-glutamylcyclotransferase 2-1-like [Pyrus x bretschneideri]}	{sp|Q8GY54|GCT21_ARATH; Gamma-glutamylcyclotransferase 2-1 OS=Arabidopsis thaliana GN=GGCT2;1 PE=1 SV=1}	{fve:101304934; - - - - -}	{At5g26220; KOG3182 Predicted cation transporter P Inorganic ion transport and metabolism ;}	{GO:0003839; gamma-glutamylcyclotransferase activity; molecular_function GO:0006751; glutathione catabolic process; biological_process}	{XM_009369697.2; PREDICTED: Pyrus x bretschneideri gamma-glutamylcyclotransferase 2-1-like (LOC103957519), mRNA}	{PF04752:ChaC-like protein}	26.3833	24.5567	43.2667	40.17	12.8817	9.19078	0.48706	0.5812	0.87244	FALSE	20.0222	13.234	0.59735	0.46908	1	FALSE	21.8535	10.0386	1.1223	0.13339	0.40334	FALSE	15.6428	11.7132	0.41736	0.66378	0.95614	FALSE	17.3334	19.4483	-0.16609	0.81168	1	FALSE	16.9893	8.80425	0.94836	0.22713
MD15G1291100_novel01	MD15G1291100	Novel_lncRNA	1858	5	{XP_017189069.1; PREDICTED: uncharacterized protein LOC108173805 isoform X6 [Malus domestica]}	{NA}	{pxb:103950297; - - - - -}	{NA}	{NA}	{XR_001954732.1; PREDICTED: Pyrus x bretschneideri uncharacterized LOC103965454 (LOC103965454), transcript variant X10, ncRNA}	{NA}	129.54	83.7367	68.6967	71.0167	101.456	89.5722	0.17973	0.93109	1	FALSE	61.6962	104.611	-0.76178	0.38962	1	FALSE	67.2151	97.9397	-0.54311	0.24982	0.56551	FALSE	54.3947	92.5251	-0.76638	0.38536	0.88797	FALSE	60.0595	59.9476	0.0026905	0.98739	1	FALSE	58.704	85.8047	-0.5476	0.25882
MD15G1291600_novel06	MD15G1291600	Novel_lncRNA	1928	1	{NA}	{NA}	{NA}	{NA}	{NA}	{XM_009337794.2; PREDICTED: Pyrus x bretschneideri U-box domain-containing protein 4-like (LOC103928719), transcript variant X1, mRNA}	{NA}	64.15	42.9	56.5967	58.97	48.586	46.4043	0.06628	0.86368	0.99321	FALSE	53.8436	49.7998	0.11263	0.96109	1	FALSE	58.7624	50.6881	0.21325	0.71722	0.91398	FALSE	47.1678	44.0512	0.098622	0.90221	1	FALSE	52.0983	52.2602	-0.0044776	0.93009	1	FALSE	50.9035	44.4453	0.19574	0.65262
MD15G1321000_novel02	MD15G1321000	Novel_lncRNA	310	1	{NA}	{NA}	{NA}	{NA}	{NA}	{XM_009367552.2; PREDICTED: Pyrus x bretschneideri serine/threonine-protein kinase SAPK2-like (LOC103955653), mRNA}	{NA}	0	7.91667	0	21.3933	0.431246	0	Inf	0.94461	1	FALSE	0	0.447638	#NAME?	0.92706	1	FALSE	0	0	NA	NA	NA	NA	0.680507	0.39586	0.78162	0.97773	1	FALSE	0.740096	0	Inf	0.60483	1	FALSE	0.723023	0	Inf	0.61015
MD15G1339000	MD15G1339000	Novel_lncRNA	2105	2	{NA}	{NA}	{NA}	{NA}	{NA}	{HF968765.1; Malus x domestica metacontig of the Co-Gene region, cultivar Procats28, columnar allele}	{NA}	224.317	66.6033	121.353	62.1333	84.4823	181.836	-1.1059	0.22311	0.54939	FALSE	122.232	86.9539	0.4913	0.40986	1	FALSE	133.177	198.688	-0.57715	0.49329	0.77952	FALSE	54.8575	76.9456	-0.48815	0.54273	0.9346	FALSE	60.5561	118.278	-0.96584	0.16031	0.8353	FALSE	59.1326	174.424	-1.5606	0.14111
MD15G1343200_novel01	MD15G1343200	Novel_lncRNA	1496	1	{CAN73437.1; hypothetical protein VITISV_031733 [Vitis vinifera]}	{sp|P92520|M820_ARATH; Uncharacterized mitochondrial protein AtMg00820 OS=Arabidopsis thaliana GN=AtMg00820 PE=4 SV=1}	{pmum:103323688; - - - - -}	{At4g23160_1; KOG0017 FOG: Transposon-encoded proteins with TYA, reverse transcriptase, integrase domains in various combinations R General function prediction only ;}	{NA}	{XM_008340509.2; PREDICTED: Malus x domestica probable plastid-lipid-associated protein 7, chloroplastic (LOC103401791), mRNA}	{NA}	23.9233	10.2667	7.82	8.84667	8.33725	12.9058	-0.63037	0.51101	0.81624	FALSE	5.40401	8.56324	-0.66413	0.55482	1	FALSE	5.87936	14.1042	-1.2624	0.16438	0.45506	FALSE	5.19781	7.57861	-0.54403	0.65732	0.95614	FALSE	5.71137	5.2587	0.11913	0.97108	1	FALSE	5.57472	12.3701	-1.1499	0.20676
MD15G1374900_novel01	MD15G1374900	Novel_lncRNA	466	1	{NA}	{NA}	{NA}	{NA}	{NA}	{XM_009374954.2; PREDICTED: Pyrus x bretschneideri TMV resistance protein N-like (LOC103962254), transcript variant X3, mRNA}	{NA}	572.397	542.067	442.237	306.44	87.2095	52.281	0.7382	0.26704	0.60617	FALSE	55.0186	89.7015	-0.70521	0.31158	1	FALSE	59.9889	57.1461	0.070039	0.89908	0.99581	FALSE	32.7895	79.3184	-1.2744	0.089108	0.71163	FALSE	36.5288	53.4991	-0.55048	0.29183	0.95378	FALSE	35.8044	50.0664	-0.48371	0.32266
MD15G1375300_novel01	MD15G1375300	Novel_lncRNA	2065	6	{XP_009337752.1; PREDICTED: uncharacterized protein LOC103930177 [Pyrus x bretschneideri]}	{NA}	{NA}	{NA}	{NA}	{XR_001953072.1; PREDICTED: Pyrus x bretschneideri uncharacterized LOC103945584 (LOC103945584), transcript variant X3, misc_RNA}	{NA}	0.8	0.273333	1.36	1.09	0.431246	0.646958	-0.58516	1	1	FALSE	1.47605	0.447638	1.7213	0.47878	1	FALSE	1.61374	0.706357	1.1919	0.61717	0.85986	FALSE	0.961017	0.39586	1.2796	0.72016	0.98577	FALSE	1.07033	1.43798	-0.42599	1	1	FALSE	1.04638	0.621571	0.75142	0.86658
MD15G1382000_novel02	MD15G1382000	Novel_lncRNA	224	1	{NA}	{NA}	{NA}	{NA}	{NA}	{XM_008340701.2; PREDICTED: Malus x domestica protein CutA, chloroplastic (LOC103401969), mRNA}	{NA}	2613.1	3081.74	2538.97	1580.4	18.698	10.0704	0.89276	0.24337	0.57811	FALSE	14.3373	19.1648	-0.41869	0.64049	1	FALSE	15.5778	11.0022	0.5017	0.44395	0.7439	FALSE	8.06115	16.9519	-1.0724	0.18953	0.83251	FALSE	8.90182	13.9796	-0.65115	0.3722	0.97823	FALSE	8.71368	9.64633	-0.1467	0.89252
MD15G1384000_novel07	MD15G1384000	Novel_lncRNA	311	1	{ONI35324.1; hypothetical protein PRUPE_1G530100 [Prunus persica]}	{NA}	{pmum:103319511; K11855 USP36_42 ubiquitin carboxyl-terminal hydrolase 36/42 3.4.19.12 -}	{NA}	{NA}	{XM_008354509.2; PREDICTED: Malus x domestica ubiquitin carboxyl-terminal hydrolase 16-like (LOC103416252), mRNA}	{NA}	118.643	126.283	47.5933	93.2	5.65103	3.2545	0.79608	0.5164	0.82155	FALSE	1.98167	5.78049	-1.5445	0.21192	1	FALSE	2.16303	3.5786	-0.72634	0.68138	0.89375	FALSE	3.19116	5.11082	-0.67947	0.44401	0.90298	FALSE	3.59011	1.9358	0.8911	0.85911	1	FALSE	3.55713	3.1255	0.18663	0.99298
MD15G1386200_novel02	MD15G1386200	Novel_lncRNA	1191	1	{NA}	{NA}	{NA}	{NA}	{NA}	{HF968765.1; Malus x domestica metacontig of the Co-Gene region, cultivar Procats28, columnar allele}	{NA}	691.183	835.3	1208.03	1170.83	513.507	279.569	0.87718	0.10854	0.3903	FALSE	633.579	525.879	0.26879	0.71074	1	FALSE	689.983	305.006	1.1777	0.0038371	0.035559	TRUE	527.526	465.247	0.18124	0.87672	1	FALSE	583.347	615.819	-0.078152	0.81441	1	FALSE	571.17	267.589	1.0939	0.021738
MD15G1386200_novel03	MD15G1386200	Novel_lncRNA	519	1	{NA}	{NA}	{NA}	{NA}	{NA}	{NA}	{NA}	4662.13	5849.86	8763.42	6828.99	1031.21	533.685	0.95028	0.074587	0.32095	FALSE	1331.95	1056.78	0.33387	0.59545	1	FALSE	1450.64	583.01	1.3151	0.0010674	0.01437	TRUE	886.302	935.007	-0.07718	0.81846	1	FALSE	978.336	1295.36	-0.40495	0.38152	0.98225	FALSE	957.669	511.103	0.90591	0.071592
MD15G1387800_novel05	MD15G1387800	Novel_lncRNA	502	1	{NA}	{NA}	{NA}	{NA}	{NA}	{XM_018645977.1; PREDICTED: Pyrus x bretschneideri GATA transcription factor 24-like (LOC103941196), transcript variant X2, mRNA}	{NA}	1619.49	798.48	906.013	1076.73	140.769	172.876	-0.2964	0.60087	0.87762	FALSE	128.928	144.56	-0.16511	0.81415	1	FALSE	140.456	188.629	-0.42544	0.35476	0.66999	FALSE	132.062	127.866	0.046583	0.96993	1	FALSE	146.249	125.3	0.22304	0.71428	1	FALSE	143.297	165.439	-0.20729	0.58701
MD15G1406900	MD15G1406900	Novel_lncRNA	1051	6	{XP_018498886.1; PREDICTED: uncharacterized protein LOC103930722 isoform X6 [Pyrus x bretschneideri]}	{NA}	{NA}	{NA}	{NA}	{XR_531149.2; PREDICTED: Malus x domestica uncharacterized LOC103448014 (LOC103448014), ncRNA}	{NA}	4480.48	4206.59	3676.02	2941.27	2483.54	1539.97	0.68949	0.26202	0.59797	FALSE	1663.86	2556.01	-0.61936	0.34392	1	FALSE	1813.75	1683.05	0.1079	0.78177	0.94079	FALSE	1129.32	2260.55	-1.0012	0.16754	0.81275	FALSE	1249.01	1617.25	-0.37275	0.50504	0.98551	FALSE	1220.53	1475.08	-0.27329	0.64077
MD15G1417800_novel03	MD15G1417800	Novel_lncRNA	212	1	{NA}	{NA}	{NA}	{NA}	{NA}	{XM_008363430.2; PREDICTED: Malus x domestica uncharacterized LOC103425352 (LOC103425352), mRNA}	{NA}	616.38	459.607	246.75	523.09	1.91019	1.52658	0.32341	1	1	FALSE	0.970423	1.97362	-1.0242	0.68239	1	FALSE	1.06444	1.66999	-0.64974	0.78567	0.94079	FALSE	1.70854	1.74728	-0.032343	1	1	FALSE	1.90039	0.940159	1.0153	0.65507	1	FALSE	1.86441	1.46365	0.34914	0.99197
MD15G1418700_novel02	MD15G1418700	Novel_lncRNA	1811	2	{ONI08376.1; hypothetical protein PRUPE_5G174400 [Prunus persica]}	{NA}	{NA}	{NA}	{NA}	{XM_008367056.2; PREDICTED: Malus x domestica partner of Y14 and mago-like (LOC103428925), mRNA}	{NA}	5.06667	4.80333	7.28	3.36333	5.46458	3.3782	0.69386	0.63753	0.8993	FALSE	6.37444	5.62352	0.18083	0.84745	1	FALSE	6.9438	3.67318	0.9187	0.38245	0.69285	FALSE	2.49185	4.97382	-0.99714	0.64812	0.95614	FALSE	2.74645	6.19886	-1.1744	0.45584	0.98512	FALSE	2.65439	3.22644	-0.28156	1
MD15G1423300_novel06	MD15G1423300	Novel_lncRNA	1433	3	{NA}	{NA}	{NA}	{NA}	{NA}	{XM_008220576.2; PREDICTED: Prunus mume uncharacterized protein At1g10890 (LOC103319081), transcript variant X2, mRNA}	{NA}	115.623	128.7	99.16	69.9	112.667	58.8031	0.93811	0.20735	0.5374	FALSE	67.8577	116.164	-0.77558	0.32698	1	FALSE	74.2066	64.0925	0.21139	0.80704	0.94872	FALSE	39.517	102.756	-1.3787	0.1186	0.77959	FALSE	43.7033	65.8059	-0.59047	0.51178	0.99171	FALSE	42.6372	56.2645	-0.40011	0.54809
MD15G1423300_novel09	MD15G1423300	Novel_lncRNA	1560	2	{KRH44038.1; hypothetical protein GLYMA_08G186200 [Glycine max]}	{NA}	{NA}	{NA}	{NA}	{XM_017333873.1; PREDICTED: Malus x domestica uncharacterized protein At1g10890-like (LOC103441924), transcript variant X5, mRNA}	{NA}	725.527	739.77	927.323	546.79	667.838	409.135	0.70692	0.17714	0.49595	FALSE	685.274	684.815	0.00096677	0.97099	1	FALSE	746.96	447.204	0.7401	0.068759	0.28007	FALSE	341.456	605.695	-0.82689	0.20673	0.83852	FALSE	377.023	666.1	-0.82108	0.11386	0.71555	FALSE	368.076	391.942	-0.090634	0.94033
MD15G1434900_novel09	MD15G1434900	Novel_lncRNA	330	2	{XP_009353746.1; PREDICTED: uncharacterized protein LOC103944981 [Pyrus x bretschneideri]}	{NA}	{pxb:103944981; - - - - -}	{NA}	{NA}	{XM_009355472.2; PREDICTED: Pyrus x bretschneideri uncharacterized LOC103944981 (LOC103944981), transcript variant X2, mRNA}	{NA}	2548.77	1336.81	1508.79	2432.61	80.6307	87.8277	-0.12335	0.76391	0.96637	FALSE	73.2118	82.9463	-0.1801	0.87556	1	FALSE	79.7987	95.9443	-0.26583	0.58809	0.84362	FALSE	101.816	73.3538	0.47302	0.44937	0.90355	FALSE	113.031	71.1897	0.66698	0.22625	0.89726	FALSE	110.895	84.1019	0.39899	0.47031
MD15G1438700_novel01	MD15G1438700	Novel_lncRNA	1053	4	{XP_017184106.1; PREDICTED: DNA-directed RNA polymerase IV subunit 1-like [Malus domestica]}	{NA}	{NA}	{NA}	{NA}	{XR_001787687.1; PREDICTED: Malus x domestica uncharacterized LOC103416398 (LOC103416398), ncRNA}	{NA}	933.687	1290.46	887.673	1021.88	783.03	322.486	1.2798	0.090879	0.35518	FALSE	405.385	805.825	-0.99117	0.18278	1	FALSE	442.269	352.34	0.32796	0.44594	0.7439	FALSE	397.13	712.545	-0.84337	0.25186	0.85748	FALSE	441.045	393.777	0.16355	0.75458	1	FALSE	432.123	308.928	0.48417	0.3175
MD15G1441400_novel02	MD15G1441400	Novel_lncRNA	2563	3	{XP_017186814.1; PREDICTED: probable RNA polymerase II transcription factor B subunit 1-3 [Malus domestica]}	{NA}	{pxb:103946393; K03141 TFIIH1, GTF2H1, TFB1 transcription initiation factor TFIIH subunit 1 - ko03022; Genetic Information Processing; Transcription; Basal transcription factors | ko03420; Genetic Information Processing; Replication and repair; Nucleotide excision repair | ko05203; Human Diseases; Cancers: Overview; Viral carcinogenesis}	{NA}	{NA}	{XM_017331325.1; PREDICTED: Malus x domestica probable RNA polymerase II transcription factor B subunit 1-3 (LOC103431797), mRNA}	{NA}	42.08	28.38	37.06	28.9833	44.6612	41.8674	0.093193	0.84957	0.98974	FALSE	48.1839	45.7838	0.073714	0.96561	1	FALSE	52.5211	45.7439	0.19932	0.70663	0.91042	FALSE	31.8173	40.497	-0.348	0.70725	0.97844	FALSE	35.0873	46.8199	-0.41617	0.61675	1	FALSE	34.1433	40.0916	-0.2317	0.87779
MD15G1444500_novel01	MD15G1444500	Novel_lncRNA	692	1	{NA}	{NA}	{NA}	{NA}	{NA}	{NA}	{NA}	4.96333	0	0.956667	0	0	0.955561	#NAME?	0.42667	0.75778	FALSE	0.252812	0	Inf	1	1	FALSE	0.274648	1.04022	-1.9212	0.68407	0.89375	FALSE	0	0	NA	NA	NA	NA	0	0.248911	#NAME?	1	1	FALSE	0	0.915368	#NAME?	0.45948
MD16G1000400_novel01	MD16G1000400	Novel_lncRNA	1047	2	{NA}	{NA}	{NA}	{NA}	{NA}	{XM_017323704.1; PREDICTED: Malus x domestica delta(24)-sterol reductase-like (LOC103403411), transcript variant X2, mRNA}	{NA}	31.2867	8.78	15.6067	5.59	4.46368	10.7553	-1.2687	0.27526	0.61933	FALSE	6.83001	4.55652	0.58396	0.64799	1	FALSE	7.41545	11.7469	-0.66367	0.54933	0.81318	FALSE	2.13189	4.03045	-0.91881	0.53766	0.93375	FALSE	2.35586	6.66127	-1.4995	0.22371	0.89253	FALSE	2.29269	10.3045	-2.1682	0.04685
MD16G1006300_novel07	MD16G1006300	Novel_lncRNA	405	1	{NA}	{NA}	{NA}	{NA}	{NA}	{XM_008342255.2; PREDICTED: Malus x domestica ADP-ribosylation factor GTPase-activating protein AGD4-like (LOC103403422), partial mRNA}	{NA}	1154.34	753.187	1102.87	1509.67	83.1908	75.3773	0.14229	0.8779	0.99464	FALSE	97.0935	85.5681	0.1823	0.72386	1	FALSE	105.832	82.2875	0.36303	0.45645	0.75622	FALSE	116.016	75.6914	0.61612	0.32067	0.86303	FALSE	128.716	94.2124	0.4502	0.38539	0.98337	FALSE	126.192	72.1461	0.80663	0.095634
MD16G1016800_novel09	MD16G1016800	Novel_lncRNA	360	1	{NA}	{NA}	{NA}	{NA}	{NA}	{XM_008383543.2; PREDICTED: Malus x domestica alpha,alpha-trehalose-phosphate synthase [UDP-forming] 6 (LOC103444588), transcript variant X2, mRNA}	{NA}	6412.6	9010.65	6424.58	7093.34	744.365	301.617	1.3033	0.10869	0.3903	FALSE	414.263	767.449	-0.88952	0.29107	1	FALSE	451.366	329.374	0.45457	0.24139	0.55901	FALSE	393.703	678.818	-0.78592	0.30283	0.86303	FALSE	436.377	402.953	0.11497	0.89251	1	FALSE	427.522	288.92	0.56533	0.23751
MD16G1029100_novel01	MD16G1029100	Novel_lncRNA	817	1	{NA}	{NA}	{NA}	{NA}	{NA}	{XM_018647775.1; PREDICTED: Pyrus x bretschneideri putative 1-phosphatidylinositol-3-phosphate 5-kinase FAB1C (LOC103948501), mRNA}	{NA}	1180.01	1931.63	2475.2	3301.07	791.629	287.099	1.4633	0.0077445	0.074981	FALSE	802.427	812.359	-0.017749	0.87453	1	FALSE	876.995	313.52	1.484	0.025246	0.1374	FALSE	891.5	718.306	0.31164	0.59224	0.94374	FALSE	982.435	777.296	0.3379	0.37883	0.98128	FALSE	959.606	274.971	1.8032	0.00019003
MD16G1050600	MD16G1050600	Novel_lncRNA	440	2	{NA}	{NA}	{NA}	{NA}	{NA}	{XR_524099.2; PREDICTED: Malus x domestica uncharacterized LOC103402744 (LOC103402744), ncRNA}	{NA}	48765.5	20719.5	11765.3	727.883	2548.44	3945.7	-0.63067	0.33258	0.66793	FALSE	1294	2610.84	-1.0127	0.21822	1	FALSE	1408.19	4305.39	-1.6123	0.00036038	0.0060648	TRUE	66.1978	2310.21	-5.1251	5.4372e-05	0.0076906	TRUE	72.5012	1262.96	-4.1227	0.00066094	0.12847	FALSE	70.5525	3778.11	-5.7428	6.9908e-18
MD16G1057400_novel02	MD16G1057400	Novel_lncRNA	275	1	{NA}	{NA}	{NA}	{NA}	{NA}	{XM_008354721.1; PREDICTED: Malus x domestica S-adenosylmethionine decarboxylase proenzyme-like (LOC103416479), mRNA}	{NA}	575.207	253.487	518.873	1628.48	5.89066	8.59823	-0.54561	0.76367	0.96637	FALSE	11.2811	5.99694	0.91161	0.60349	1	FALSE	12.3349	9.36985	0.39664	0.77141	0.93875	FALSE	31.0043	5.30142	2.548	0.0081477	0.21608	FALSE	34.4196	10.8971	1.6593	0.033819	0.5962	FALSE	33.8349	8.22465	2.0405	0.014153
MD16G1061100_novel14	MD16G1061100	Novel_lncRNA	228	1	{NA}	{NA}	{NA}	{NA}	{NA}	{XM_017323783.1; PREDICTED: Malus x domestica probable inactive purple acid phosphatase 1 (LOC103402823), transcript variant X3, mRNA}	{NA}	1432.98	1265.24	1621.67	2056.97	8.82293	6.82099	0.37128	0.68041	0.9231	FALSE	10.842	9.04425	0.26156	0.90709	1	FALSE	11.8454	7.46323	0.66646	0.48653	0.77952	FALSE	12.0123	8.00123	0.58621	0.60572	0.94985	FALSE	13.2924	10.5044	0.33961	0.69267	1	FALSE	13.0322	6.54681	0.99321	0.24656
MD16G1073900_novel01	MD16G1073900	Novel_lncRNA	481	3	{XP_009360345.1; PREDICTED: origin of replication complex subunit 6 [Pyrus x bretschneideri]}	{sp|A2YNY4|ORC6_ORYSI; Origin of replication complex subunit 6 OS=Oryza sativa subsp. indica GN=OsI_26966 PE=3 SV=1}	{mdm:103451820; K02608 ORC6 origin recognition complex subunit 6 - ko04110; Cellular Processes; Cell growth and death; Cell cycle | ko04111; Cellular Processes; Cell growth and death; Cell cycle - yeast | ko04113; Cellular Processes; Cell growth and death; Meiosis - yeast}	{NA}	{NA}	{XR_528924.2; PREDICTED: Malus x domestica uncharacterized LOC103431849 (LOC103431849), transcript variant X3, ncRNA}	{NA}	80.9133	42.1933	81.2933	68.0533	6.86275	8.0554	-0.23117	0.90582	1	FALSE	10.58	7.03522	0.58867	0.56673	1	FALSE	11.5273	8.79869	0.38969	0.64181	0.87623	FALSE	7.6378	6.22106	0.296	0.88849	1	FALSE	8.44634	10.2755	-0.28282	0.71702	1	FALSE	8.2854	7.722	0.1016	1
MD16G1082900_novel01	MD16G1082900	Novel_lncRNA	1982	1	{XP_007223616.1; hypothetical protein PRUPE_ppa013780mg [Prunus persica]}	{NA}	{pmum:103321464; - - - - -}	{NA}	{NA}	{XR_001786029.1; PREDICTED: Malus x domestica uncharacterized LOC103402957 (LOC103402957), misc_RNA}	{NA}	194.06	84.7433	147.83	152.05	106.867	146.242	-0.45254	0.41465	0.74828	FALSE	144.361	110.166	0.39	0.36987	1	FALSE	157.218	159.704	-0.022634	0.92792	1	FALSE	125.785	97.4583	0.36811	0.41949	0.90298	FALSE	139.06	140.549	-0.015364	0.93747	1	FALSE	135.552	140.187	-0.048512	0.90719
MD16G1090200_novel09	MD16G1090200	Novel_lncRNA	1055	1	{NA}	{NA}	{NA}	{NA}	{NA}	{XR_524130.2; PREDICTED: Malus x domestica serine/arginine-rich splicing factor RSZ21-like (LOC103402999), transcript variant X2, misc_RNA}	{NA}	547.313	482.46	522.657	486.957	285.226	188.547	0.59718	0.33451	0.66798	FALSE	237.697	293.441	-0.30395	0.70412	1	FALSE	259.06	205.767	0.33228	0.42473	0.72392	FALSE	188.765	259.516	-0.45923	0.52744	0.93142	FALSE	209.189	231.113	-0.14379	0.73902	1	FALSE	204.75	180.449	0.18227	0.69084
MD16G1101000_novel01	MD16G1101000	Novel_lncRNA	584	2	{XP_007223550.1; hypothetical protein PRUPE_ppa013719mg [Prunus persica]}	{NA}	{NA}	{NA}	{NA}	{NA}	{NA}	8.10333	23.7367	9.26	22.45	6.5443	0.902715	2.8579	0.09212	0.3572	FALSE	1.66324	6.75464	-2.0219	0.20589	1	FALSE	1.81104	0.982613	0.88212	0.68205	0.89375	FALSE	3.87167	5.97382	-0.6257	0.6235	0.95614	FALSE	4.3302	1.62436	1.4146	0.56507	1	FALSE	4.28016	0.861738	2.3123	0.34554
MD16G1108900_novel01	MD16G1108900	Novel_lncRNA	1374	3	{XP_007220548.1; hypothetical protein PRUPE_ppa003151mg [Prunus persica]}	{NA}	{rcu:8284262; - - - - -}	{NA}	{GO:0003714; transcription corepressor activity; molecular_function GO:0006351; transcription, DNA-dependent; biological_process}	{XM_009344936.2; PREDICTED: Pyrus x bretschneideri protein SCAI-like (LOC103935179), transcript variant X2, mRNA}	{PF12070:Protein of unknown function (DUF3550/UPF0682)}	587.12	439.317	771.483	612.257	330.717	283.299	0.22327	0.65189	0.90463	FALSE	479.494	339.229	0.49925	0.43161	1	FALSE	522.427	309.579	0.75492	0.076741	0.28784	FALSE	329.096	300.114	0.133	0.80991	1	FALSE	363.885	465.182	-0.35431	0.53779	1	FALSE	355.392	271.309	0.38947	0.34079
MD16G1108900_novel02	MD16G1108900	Novel_lncRNA	1071	4	{XP_011470551.1; PREDICTED: protein SCAI [Fragaria vesca subsp. vesca]}	{NA}	{rcu:8284262; - - - - -}	{NA}	{GO:0003714; transcription corepressor activity; molecular_function GO:0006351; transcription, DNA-dependent; biological_process}	{XM_009344936.2; PREDICTED: Pyrus x bretschneideri protein SCAI-like (LOC103935179), transcript variant X2, mRNA}	{PF12070:Protein of unknown function (DUF3550/UPF0682)}	266.693	168.303	258.58	383.7	93.7609	93.9455	-0.0028369	0.91599	1	FALSE	116.036	96.0171	0.27321	0.73253	1	FALSE	126.3	102.509	0.30111	0.49568	0.77952	FALSE	151.898	84.9201	0.83892	0.21278	0.8412	FALSE	168.375	112.558	0.58101	0.22436	0.89253	FALSE	164.806	89.9255	0.87397	0.049722
MD16G1124900_novel01	MD16G1124900	Novel_lncRNA	287	2	{XP_009360007.1; PREDICTED: kinesin-like protein KIN-4A isoform X2 [Pyrus x bretschneideri]}	{sp|Q6YUL8|KN4A_ORYSJ; Kinesin-like protein KIN-4A OS=Oryza sativa subsp. japonica GN=KIN4A PE=1 SV=1}	{pxb:103950503; K10395 KIF4_21_27 kinesin family member 4/21/27 - -}	{At5g47820; KOG0244 Kinesin-like protein Z Cytoskeleton ;}	{NA}	{XR_524151.2; PREDICTED: Malus x domestica uncharacterized LOC103403204 (LOC103403204), transcript variant X2, ncRNA}	{NA}	644.133	315.92	509.503	709.87	10.0379	12.305	-0.29379	0.74517	0.95294	FALSE	13.6532	10.323	0.40337	0.62732	1	FALSE	14.8834	13.4358	0.14762	0.87048	0.98004	FALSE	16.542	9.13218	0.8571	0.29	0.86303	FALSE	18.234	13.254	0.4602	0.52875	1	FALSE	17.8272	11.7879	0.59678	0.3918
MD16G1126300_novel01	MD16G1126300	Novel_lncRNA	281	1	{XP_009336462.1; PREDICTED: somatic embryogenesis receptor kinase 1-like [Pyrus x bretschneideri]}	{NA}	{mdm:103452191; - - - - -}	{NA}	{NA}	{XM_009350740.2; PREDICTED: Pyrus x bretschneideri somatic embryogenesis receptor kinase 1-like (LOC103940594), mRNA}	{NA}	504.77	104.347	207.443	16.4833	2.68746	8.50585	-1.6622	0.16902	0.48501	FALSE	5.07046	2.75665	0.8792	0.50658	1	FALSE	5.51891	9.29392	-0.7519	0.47883	0.77523	FALSE	0.340254	2.44095	-2.8428	0.29014	0.86303	FALSE	0.370048	4.94143	-3.7391	0.037264	0.5962	FALSE	0.361511	8.14604	-4.494	0.0031387
MD16G1127000	MD16G1127000	Novel_lncRNA	998	2	{XP_008389945.1; PREDICTED: chitin-binding lectin 1-like [Malus domestica]}	{NA}	{mdm:103452198; - - - - -}	{NA}	{NA}	{XM_018645839.1; PREDICTED: Pyrus x bretschneideri leucine-rich repeat extensin-like protein 3 (LOC103940598), mRNA}	{NA}	3720.1	1321.88	2424.7	3036.33	643.876	1189.05	-0.88496	0.13395	0.44007	FALSE	997.369	659.379	0.59702	0.37325	1	FALSE	1086.46	1297.88	-0.25652	0.49496	0.77952	FALSE	1080.82	583.368	0.88965	0.21012	0.83852	FALSE	1191.54	967.049	0.30117	0.56055	1	FALSE	1166.18	1137.96	0.035341	0.97968
MD16G1127600_novel01	MD16G1127600	Novel_lncRNA	238	1	{NA}	{NA}	{NA}	{NA}	{NA}	{XR_531805.2; PREDICTED: Malus x domestica uncharacterized LOC103452943 (LOC103452943), transcript variant X1, ncRNA}	{NA}	99.83	0	52.0067	50.5633	0	0.632082	#NAME?	0.63395	0.89635	FALSE	0.505624	0	Inf	0.71044	1	FALSE	0.549297	0.687043	-0.32282	1	1	FALSE	0.407272	0	Inf	0.98373	1	FALSE	0.460009	0.497821	-0.11397	1	1	FALSE	0.456517	0.604582	-0.40527	1
MD16G1145400_novel01	MD16G1145400	Novel_lncRNA	4152	4	{XP_008351933.1; PREDICTED: uncharacterized protein LOC103415376 [Malus domestica]}	{sp|Q8VYI9|NLTL5_ARATH; Non-specific lipid-transfer protein-like protein At5g64080 OS=Arabidopsis thaliana GN=At5g64080 PE=1 SV=1}	{pper:PRUPE_ppa004935mg; - - - - -}	{NA}	{NA}	{XR_001786006.1; PREDICTED: Malus x domestica uncharacterized LOC103403491 (LOC103403491), transcript variant X9, ncRNA}	{NA}	128.603	68.0067	75.0733	77.1933	185.572	216.73	-0.22391	0.66981	0.91847	FALSE	165.351	190.719	-0.20592	0.75546	1	FALSE	180.328	236.762	-0.39281	0.36303	0.67384	FALSE	144.412	168.71	-0.22436	0.79484	1	FALSE	159.938	160.615	-0.0060913	0.94605	1	FALSE	156.323	207.594	-0.40923	0.40334
MD16G1145400_novel02	MD16G1145400	Novel_lncRNA	1207	6	{XP_008391597.1; PREDICTED: non-specific lipid-transfer protein-like protein At5g64080 [Malus domestica]}	{sp|Q8VYI9|NLTL5_ARATH; Non-specific lipid-transfer protein-like protein At5g64080 OS=Arabidopsis thaliana GN=At5g64080 PE=1 SV=1}	{var:108332223; - - - - -}	{NA}	{NA}	{XR_001786004.1; PREDICTED: Malus x domestica uncharacterized LOC103403491 (LOC103403491), transcript variant X7, ncRNA}	{NA}	2026.75	1522.64	1074.15	1063.82	1088.85	833.95	0.38477	0.57846	0.87244	FALSE	579.203	1121.28	-0.95301	0.16891	1	FALSE	631.483	911.395	-0.52933	0.19067	0.50179	FALSE	489.195	991.636	-1.0194	0.16296	0.81275	FALSE	541.731	562.634	-0.054618	0.96109	1	FALSE	529.613	798.875	-0.59303	0.24468
MD16G1160700_novel02	MD16G1160700	Novel_lncRNA	216	1	{NA}	{NA}	{NA}	{NA}	{NA}	{AY026911.1; Malus x domestica ribonuclease-like PR-10a (YPR10*a) gene, complete cds}	{NA}	22234.1	20682.2	71419.4	133698	88.7022	66.4497	0.41671	0.53329	0.84141	FALSE	305.138	90.6395	1.7512	0.049608	1	FALSE	333.336	72.4185	2.2025	0.0064984	0.054681	FALSE	511.642	80.1895	2.6736	0.00017882	0.01626	TRUE	566.561	295.185	0.94061	0.050684	0.635	FALSE	555.785	63.6264	3.1268	1.5457e-08
MD16G1162500_novel01	MD16G1162500	Novel_lncRNA	387	3	{NA}	{NA}	{NA}	{NA}	{NA}	{XM_008370130.2; PREDICTED: Malus x domestica 60S ribosomal protein L19-1 (LOC103431957), mRNA}	{NA}	21079.6	8213.91	11252.6	14523.8	780.991	1216.52	-0.63938	0.2442	0.579	FALSE	876.628	801.825	0.12868	0.83991	1	FALSE	955.351	1327.17	-0.47425	0.23005	0.54409	FALSE	978.528	709.278	0.46426	0.49835	0.9155	FALSE	1078.91	850.564	0.34308	0.52415	0.99456	FALSE	1056.47	1164.09	-0.13996	0.73565
MD16G1176100_novel01	MD16G1176100	Novel_lncRNA	3608	1	{XP_008340852.1; PREDICTED: acyl carrier protein 1, chloroplastic-like isoform X1 [Malus domestica]}	{sp|P52412|ACP2_CUPLA; Acyl carrier protein 2, chloroplastic OS=Cuphea lanceolata GN=ACL1.2 PE=2 SV=1}	{mdm:103453004; - - - - -}	{At4g25050; KOG1748 Acyl carrier protein/NADH-ubiquinone oxidoreductase, NDUFAB1/SDAP subunit CIQ Energy production and conversion ; Lipid transport and metabolism ; Secondary metabolites biosynthesis, transport and catabolism ;}	{NA}	{XM_008370138.2; PREDICTED: Malus x domestica acyl carrier protein 1, chloroplastic-like (LOC103431964), transcript variant X2, mRNA}	{NA}	594.6	95.7467	176.27	325.51	217.701	859.72	-1.9815	0.00050974	0.011429	TRUE	326.233	223.354	0.54657	0.38863	1	FALSE	355.457	938.844	-1.4012	0.00064129	0.0097188	TRUE	520.06	197.589	1.3962	0.040176	0.50638	FALSE	574.206	316.358	0.86001	0.14374	0.78839	FALSE	563.004	823.101	-0.54793	0.20843
MD16G1189200_novel10	MD16G1189200	Novel_lncRNA	1129	1	{NA}	{NA}	{NA}	{NA}	{NA}	{XR_530821.2; PREDICTED: Malus x domestica cyclin-T1-4-like (LOC103445887), transcript variant X3, misc_RNA}	{NA}	271.393	284.573	297.813	263.637	179.529	102.116	0.81401	0.1856	0.50901	FALSE	149.244	184.677	-0.30733	0.68664	1	FALSE	162.749	111.553	0.54492	0.22115	0.53268	FALSE	110.503	163.351	-0.5639	0.44843	0.90355	FALSE	121.962	145.144	-0.25106	0.64974	1	FALSE	119.121	97.7664	0.28502	0.4762
MD16G1194000_novel04	MD16G1194000	Novel_lncRNA	440	1	{NA}	{NA}	{NA}	{NA}	{NA}	{XM_008342765.2; PREDICTED: Malus x domestica FRIGIDA-like protein 4a (LOC103403921), mRNA}	{NA}	11369.8	12201.1	13974.4	13695.6	1628.39	915.944	0.83012	0.12755	0.42752	FALSE	1506.06	1671.74	-0.15057	0.80429	1	FALSE	1640.9	1000.54	0.7137	0.074818	0.28498	FALSE	1275.05	1478.58	-0.21365	0.73306	0.99275	FALSE	1411.68	1463.26	-0.051773	0.88774	1	FALSE	1382.1	877.163	0.65595	0.20652
MD16G1200100_novel01	MD16G1200100	Novel_lncRNA	245	1	{NA}	{NA}	{NA}	{NA}	{NA}	{XR_001786363.1; PREDICTED: Malus x domestica uncharacterized LOC108170024 (LOC108170024), ncRNA}	{NA}	1861.94	939.387	562.41	1400.74	12.4677	13.5509	-0.12019	0.74696	0.95366	FALSE	6.22807	12.8806	-1.0483	0.47066	1	FALSE	6.78065	14.8184	-1.1279	0.19445	0.50652	FALSE	13.5583	11.3941	0.25089	0.74724	0.9997	FALSE	15.047	6.06797	1.3102	0.18381	0.86228	FALSE	14.7915	12.978	0.18869	0.98377
MD16G1206300_novel01	MD16G1206300	Novel_lncRNA	482	1	{NA}	{NA}	{NA}	{NA}	{NA}	{NA}	{NA}	1018.79	276.89	503.177	824.807	42.9857	99.9954	-1.218	0.046712	0.24978	FALSE	65.4016	44.131	0.56753	0.37386	1	FALSE	71.223	109.234	-0.61701	0.18849	0.49887	FALSE	92.7584	39.0476	1.2482	0.064004	0.63654	FALSE	102.469	63.5311	0.68965	0.19788	0.87214	FALSE	100.397	95.7348	0.068594	0.97602
MD16G1224400_novel02	MD16G1224400	Novel_lncRNA	1121	1	{CBI23698.3; unnamed protein product, partial [Vitis vinifera]}	{NA}	{pxb:103948677; K14411 MSI RNA-binding protein Musashi - ko03015; Genetic Information Processing; Translation; mRNA surveillance pathway}	{NA}	{GO:0009245; lipid A biosynthetic process; biological_process GO:0005524; ATP binding; molecular_function GO:0009029; tetraacyldisaccharide 4'-kinase activity; molecular_function}	{XM_008342420.2; PREDICTED: Malus x domestica heterogeneous nuclear ribonucleoprotein 1 (LOC103403573), mRNA}	{PF02606:Tetraacyldisaccharide-1-P 4'-kinase}	13984.8	14434.9	17621.9	15874.8	8665.44	5217.45	0.73193	0.21585	0.53893	FALSE	8634.65	8893.46	-0.042607	0.93797	1	FALSE	9410.44	5698.82	0.7236	0.10301	0.34856	FALSE	6665.91	7866.75	-0.23896	0.70463	0.9777	FALSE	7392	8391.38	-0.18294	0.71791	1	FALSE	7239.91	4995.27	0.53541	0.40809
MD16G1226700_novel03	MD16G1226700	Novel_lncRNA	272	1	{XP_008345185.1; PREDICTED: uncharacterized protein LOC103408092 [Malus domestica]}	{NA}	{NA}	{NA}	{NA}	{XM_009359693.2; PREDICTED: Pyrus x bretschneideri putative G3BP-like protein (LOC103948654), transcript variant X1, mRNA}	{NA}	565.217	379.14	436.35	372.24	8.3641	8.29472	0.012018	0.91362	1	FALSE	8.94202	8.54181	0.06606	0.96964	1	FALSE	9.75068	9.0756	0.10351	0.94871	1	FALSE	6.62948	7.5548	-0.1885	0.79868	1	FALSE	7.30659	8.67954	-0.24842	0.84994	1	FALSE	7.1442	7.95683	-0.15542	0.93493
MD16G1229700_novel01	MD16G1229700	Novel_lncRNA	995	5	{NA}	{NA}	{NA}	{NA}	{NA}	{XR_667436.2; PREDICTED: Pyrus x bretschneideri uncharacterized LOC103948639 (LOC103948639), ncRNA}	{NA}	236.16	178.31	157.607	45.76	91.5673	75.5841	0.27675	0.56378	0.86422	FALSE	67.3168	93.6611	-0.47648	0.42838	1	FALSE	73.3086	82.7406	-0.17461	0.84403	0.96845	FALSE	16.3834	82.8151	-2.3377	0.0033392	0.13712	FALSE	18.0521	65.6688	-1.863	0.053013	0.635	FALSE	17.5334	72.4416	-2.0467	0.0028352
MD16G1229700_novel02	MD16G1229700	Novel_lncRNA	1206	4	{NA}	{NA}	{NA}	{NA}	{NA}	{XR_667436.2; PREDICTED: Pyrus x bretschneideri uncharacterized LOC103948639 (LOC103948639), ncRNA}	{NA}	294.627	291.45	248.263	37.5	182.216	120.906	0.59177	0.2973	0.64169	FALSE	134.084	186.316	-0.47462	0.48702	1	FALSE	145.894	132.246	0.14169	0.67833	0.89375	FALSE	16.9444	164.803	-3.2819	0.0029702	0.1268	FALSE	18.7126	130.774	-2.805	0.0040844	0.26079	FALSE	18.1801	115.858	-2.6719	8.7126e-07
MD16G1238800_novel01	MD16G1238800	Novel_lncRNA	1961	12	{XP_008377467.1; PREDICTED: uncharacterized protein LOC103440550 [Malus domestica]}	{NA}	{pxb:103954403; - - - - -}	{NA}	{GO:0043565; sequence-specific DNA binding; molecular_function GO:0006355; regulation of transcription, DNA-dependent; biological_process}	{XR_001789625.1; PREDICTED: Malus x domestica uncharacterized LOC108173023 (LOC108173023), ncRNA}	{PF13404:AsnC-type helix-turn-helix domain}	119.027	99.3967	113.52	85.5267	123.474	87.7436	0.49284	0.43978	0.7678	FALSE	107.104	126.993	-0.24573	0.76254	1	FALSE	116.628	95.7928	0.28392	0.51727	0.7938	FALSE	70.3857	112.317	-0.67423	0.31991	0.86303	FALSE	78.0479	103.978	-0.41385	0.37705	0.97865	FALSE	76.424	84.0156	-0.13663	0.76068
MD16G1270200_novel01	MD16G1270200	Novel_lncRNA	2397	5	{NA}	{NA}	{NA}	{NA}	{NA}	{XR_524538.2; PREDICTED: Malus x domestica uncharacterized LOC103405953 (LOC103405953), ncRNA}	{NA}	317.243	377.08	371.187	343.233	590.202	293.88	1.006	0.073984	0.32051	FALSE	450.718	606.297	-0.4278	0.48698	1	FALSE	491.491	321.203	0.61368	0.14163	0.42127	FALSE	353.415	536.142	-0.60125	0.39172	0.88922	FALSE	391.475	437.995	-0.162	0.78971	1	FALSE	382.66	281.549	0.44268	0.29923
MD16G1270600_novel02	MD16G1270600	Annotated_lncRNA	380	2	{NA}	{NA}	{NA}	{NA}	{NA}	{XM_008354978.2; PREDICTED: Malus x domestica syntaxin-22-like (LOC103416755), transcript variant X1, mRNA}	{NA}	2177.16	1279.87	1488.82	1599.06	115.595	120.431	-0.059122	0.94679	1	FALSE	110.264	118.659	-0.10587	0.86195	1	FALSE	120.113	131.502	-0.13069	0.79831	0.94366	FALSE	103.776	104.961	-0.016383	0.91693	1	FALSE	115.061	107.064	0.10392	0.93946	1	FALSE	112.855	115.345	-0.031474	0.8548
MD16G1282800_novel02	MD16G1282800	Novel_lncRNA	239	1	{NA}	{NA}	{NA}	{NA}	{NA}	{XM_009341941.2; PREDICTED: Pyrus x bretschneideri uncharacterized protein At1g76660-like (LOC103932364), mRNA}	{NA}	361.53	35.61	72.1633	125.703	0.431246	2.09094	-2.2776	0.29771	0.64169	FALSE	0.65199	0.447638	0.54252	1	1	FALSE	0.712444	2.28011	-1.6783	0.344	0.66562	FALSE	1.02076	0.39586	1.3666	0.75457	1	FALSE	1.11014	0.628714	0.82027	0.86393	1	FALSE	1.08453	1.99762	-0.88121	0.69538
MD17G1008400_novel02	MD17G1008400	Novel_lncRNA	2105	3	{NA}	{NA}	{NA}	{NA}	{NA}	{XR_670195.2; PREDICTED: Pyrus x bretschneideri uncharacterized LOC103966581 (LOC103966581), transcript variant X1, ncRNA}	{NA}	388.107	361.97	276.58	269.86	504.932	309.492	0.70619	0.32947	0.66519	FALSE	289.528	520.175	-0.84529	0.28504	1	FALSE	315.512	337.769	-0.098344	0.85856	0.97695	FALSE	240.505	460.036	-0.93568	0.24071	0.85748	FALSE	266.574	281.6	-0.079112	0.87317	1	FALSE	260.714	296.225	-0.18422	0.71845
MD17G1009100	MD17G1009100	Novel_lncRNA	741	3	{XP_008368404.1; PREDICTED: cysteine-rich and transmembrane domain-containing protein A-like [Malus domestica]}	{NA}	{NA}	{NA}	{NA}	{XM_008370182.2; PREDICTED: Malus x domestica cysteine-rich and transmembrane domain-containing protein A-like (LOC103432011), mRNA}	{NA}	5429.69	7375.51	6450.62	8986.6	2653.96	1142.61	1.2158	0.031915	0.20092	FALSE	1815.93	2727.01	-0.58661	0.3112	1	FALSE	1982.19	1247.74	0.66778	0.11058	0.36722	FALSE	2137.43	2411.4	-0.17399	0.79092	1	FALSE	2371.62	1763.52	0.42741	0.43898	0.98512	FALSE	2324.83	1094.31	1.0871	0.047805
MD17G1027400_novel07	MD17G1027400	Novel_lncRNA	648	1	{NA}	{NA}	{NA}	{NA}	{NA}	{XM_017329690.1; PREDICTED: Malus x domestica centromere-associated protein E-like (LOC103425870), mRNA}	{NA}	0	0	0	0	0	0	NA	NA	NA	NA	0	0	NA	NA	NA	NA	0	0	NA	NA	NA	NA	0	0	NA	NA	NA	NA	0	0	NA	NA	NA	NA	0	0	NA	NA
MD17G1030000_novel01	MD17G1030000	Novel_lncRNA	259	1	{XP_008341426.1; PREDICTED: YLP motif-containing protein 1-like [Malus domestica]}	{NA}	{nta:107785335; - - - - -}	{NA}	{NA}	{XM_008343204.2; PREDICTED: Malus x domestica YLP motif-containing protein 1-like (LOC103404308), mRNA}	{NA}	3064.15	1900.99	2022.95	2304.34	34.3753	32.9689	0.060266	0.96537	1	FALSE	31.4317	35.3338	-0.16883	0.86856	1	FALSE	34.2558	35.9646	-0.070228	0.9475	1	FALSE	31.494	31.2479	0.011321	1	1	FALSE	34.9869	30.5377	0.19622	0.83528	1	FALSE	34.3206	31.5655	0.12072	0.90973
MD17G1034800_novel25	MD17G1034800	Novel_lncRNA	327	1	{NA}	{NA}	{NA}	{NA}	{NA}	{XM_008343244.2; PREDICTED: Malus x domestica formate dehydrogenase, mitochondrial (LOC103404344), mRNA}	{NA}	68131	174451	175582	320172	9898.79	2294.92	2.1088	0.00052046	0.011468	TRUE	8385.3	10165.4	-0.27773	0.61827	1	FALSE	9155.4	2500.86	1.8722	9.1181e-05	0.0019766	TRUE	12980.9	8989.78	0.53003	0.51541	0.92549	FALSE	14421.4	8142.87	0.8246	0.21605	0.88073	FALSE	14172.1	2196.63	2.6897	0.00069607
MD17G1060400_novel03	MD17G1060400	Novel_lncRNA	972	2	{XP_008357785.1; PREDICTED: ras GTPase-activating protein-binding protein 2-like [Malus domestica]}	{NA}	{NA}	{NA}	{NA}	{XM_008381215.2; PREDICTED: Malus x domestica ras GTPase-activating protein-binding protein 2-like (LOC103442430), transcript variant X2, mRNA}	{NA}	519.85	66.2367	143.117	266.203	30.4374	160.508	-2.3987	9.7715e-05	0.0034689	TRUE	56.7647	31.3147	0.85815	0.20963	1	FALSE	61.8596	175.244	-1.5023	0.00084662	0.012167	TRUE	91.8486	27.725	1.7281	0.0084289	0.21898	FALSE	101.432	54.9913	0.88323	0.069159	0.64465	FALSE	99.2563	153.642	-0.63034	0.15156
MD17G1062500_novel02	MD17G1062500	Novel_lncRNA	666	1	{NA}	{NA}	{NA}	{NA}	{NA}	{XR_001790401.1; PREDICTED: Malus x domestica uncharacterized LOC108173658 (LOC108173658), ncRNA}	{NA}	1038.13	168.72	310.193	530.717	46.6964	184.024	-1.9785	0.0010861	0.018527	TRUE	72.0784	47.9352	0.58848	0.36325	1	FALSE	78.5278	200.874	-1.355	0.0028734	0.028657	TRUE	105.675	42.4143	1.317	0.047866	0.55903	FALSE	116.582	69.993	0.73606	0.1481	0.79464	FALSE	114.153	176.149	-0.62583	0.14164
MD17G1062700_novel06	MD17G1062700	Novel_lncRNA	891	2	{XP_017180867.1; PREDICTED: uncharacterized protein LOC108170441 [Malus domestica]}	{NA}	{NA}	{NA}	{NA}	{XM_017325378.1; PREDICTED: Malus x domestica uncharacterized LOC108170441 (LOC108170441), mRNA}	{NA}	70.8067	61.33	81.5267	36.5533	25.5206	19.6375	0.37805	0.59145	0.87704	FALSE	29.9777	26.2276	0.19281	0.74431	1	FALSE	32.6591	21.4516	0.6064	0.27065	0.58134	FALSE	10.9915	23.2152	-1.0787	0.17144	0.81275	FALSE	12.1822	29.23	-1.2627	0.048317	0.635	FALSE	11.9476	18.815	-0.65516	0.32998
MD17G1062700_novel07	MD17G1062700	Novel_lncRNA	493	3	{NA}	{NA}	{NA}	{NA}	{NA}	{XM_017325378.1; PREDICTED: Malus x domestica uncharacterized LOC108170441 (LOC108170441), mRNA}	{NA}	244.3	305.723	157.35	184.733	57.7458	25.0702	1.2037	0.3242	0.66414	FALSE	21.863	59.5684	-1.4461	0.27447	1	FALSE	23.8271	27.3466	-0.19876	0.79134	0.94079	FALSE	22.0646	52.6748	-1.2554	0.3046	0.86303	FALSE	24.5547	21.2578	0.20801	0.87168	1	FALSE	24.104	23.9908	0.0067937	0.94354
MD17G1062700_novel13	MD17G1062700	Novel_lncRNA	438	2	{XP_007209576.1; hypothetical protein PRUPE_ppa011139mg [Prunus persica]}	{sp|P42745|UBC2_ARATH; Ubiquitin-conjugating enzyme E2 2 OS=Arabidopsis thaliana GN=UBC2 PE=2 SV=1}	{var:108321754; K10573 UBE2A, UBC2, RAD6A ubiquitin-conjugating enzyme E2 A 2.3.2.23 ko04120; Genetic Information Processing; Folding, sorting and degradation; Ubiquitin mediated proteolysis}	{At1g14400; KOG0419 Ubiquitin-protein ligase O Posttranslational modification, protein turnover, chaperones ;}	{NA}	{XR_525046.2; PREDICTED: Malus x domestica uncharacterized LOC103408819 (LOC103408819), ncRNA}	{NA}	44.3767	92.5033	86.18	83.4367	13.7915	3.66214	1.913	0.21681	0.53907	FALSE	9.67112	14.2261	-0.55679	0.81915	1	FALSE	10.5402	4.00803	1.3949	0.25086	0.56587	FALSE	7.9453	12.5786	-0.66279	0.67373	0.95854	FALSE	8.84726	9.45723	-0.096187	0.90198	1	FALSE	8.6658	3.51224	1.3029	0.18823
MD17G1062700_novel14	MD17G1062700	Novel_lncRNA	450	2	{XP_007209576.1; hypothetical protein PRUPE_ppa011139mg [Prunus persica]}	{sp|P42745|UBC2_ARATH; Ubiquitin-conjugating enzyme E2 2 OS=Arabidopsis thaliana GN=UBC2 PE=2 SV=1}	{var:108321754; K10573 UBE2A, UBC2, RAD6A ubiquitin-conjugating enzyme E2 A 2.3.2.23 ko04120; Genetic Information Processing; Folding, sorting and degradation; Ubiquitin mediated proteolysis}	{At2g02760; KOG0419 Ubiquitin-protein ligase O Posttranslational modification, protein turnover, chaperones ;}	{NA}	{XR_525046.2; PREDICTED: Malus x domestica uncharacterized LOC103408819 (LOC103408819), ncRNA}	{NA}	380.56	729.68	600.133	773.313	109.618	32.218	1.7666	0.037541	0.21808	FALSE	69.6464	112.858	-0.69639	0.362	1	FALSE	75.9978	35.2105	1.11	0.02831	0.1484	FALSE	75.8276	99.7996	-0.39631	0.62823	0.95614	FALSE	84.0953	67.6899	0.31308	0.52335	0.99456	FALSE	82.3126	30.8607	1.4153	0.0044
MD17G1068800_novel01	MD17G1068800	Novel_lncRNA	570	1	{XP_008379476.1; PREDICTED: LOW QUALITY PROTEIN: probable galacturonosyltransferase 9 [Malus domestica]}	{NA}	{csv:101211150; K13648 GAUT alpha-1,4-galacturonosyltransferase 2.4.1.43 ko00520; Metabolism; Carbohydrate metabolism; Amino sugar and nucleotide sugar metabolism}	{NA}	{NA}	{XM_008343603.2; PREDICTED: Malus x domestica probable galacturonosyltransferase 9 (LOC103404669), mRNA}	{NA}	196.023	49.0667	49.9967	46.3433	11.468	26.6001	-1.2138	0.093659	0.35909	FALSE	8.80988	11.7875	-0.42007	0.62141	1	FALSE	9.61348	29.064	-1.5961	0.015791	0.099983	FALSE	7.11984	10.4239	-0.54997	0.64369	0.95614	FALSE	7.85202	8.51186	-0.11641	1	1	FALSE	7.66748	25.4667	-1.7318	0.017256
[truncated: 631 more rows]
[truncated: 2 more columns]
