# Supplementary material for: PacBio full-length transcriptome of wild apple (Malus sieversii) provides insights into canker disease dynamic response
Source: BMC Genomics. 2021 Jan 14;22:52. doi: 10.1186/s12864-021-07366-y (PMC7809858; doi:10.1186/s12864-021-07366-y)
Supplement: Supplementary file 9 — Additional file 9. Details regarding DETs. [file 12864_2021_7366_MOESM9_ESM.xlsx]

## Sheet: DETs
Gene_id	WW_0dpi_group_fpkm	WF_1dpi_group_fpkm	WF_2dpi_group_fpkm	WF_5dpi_group_fpkm	WF_1dpi_readcount(WF_1dpivsWW_0dpi)	WW_0dpi_readcount(WF_1dpivsWW_0dpi)	log2FoldChange(WF_1dpivsWW_0dpi)	pval(WF_1dpivsWW_0dpi)	padj(WF_1dpivsWW_0dpi)	significant(WF_1dpivsWW_0dpi)	WF_2dpi_readcount(WF_2dpivsWW_0dpi)	WW_0dpi_readcount(WF_2dpivsWW_0dpi)	log2FoldChange(WF_2dpivsWW_0dpi)	pval(WF_2dpivsWW_0dpi)	padj(WF_2dpivsWW_0dpi)	significant(WF_2dpivsWW_0dpi)	WF_5dpi_readcount(WF_5dpivsWW_0dpi)	WW_0dpi_readcount(WF_5dpivsWW_0dpi)	log2FoldChange(WF_5dpivsWW_0dpi)	pval(WF_5dpivsWW_0dpi)	padj(WF_5dpivsWW_0dpi)	significant(WF_5dpivsWW_0dpi)	Swissprot_id	Gene_description	Gene name
MD00G1003800	8.76074	1.21128	2.46102	3.94442	125.754	663.595	-2.3997	5.59e-05	0.0025115	DOWN	273.8	745.323	-1.4447	7.68e-05	0.0015527	DOWN	420.484	691.24	-0.71714	0.29965	0.6763	FALSE	sp|Q9SCY0|PGMP_ARATH	Phosphoglucomutase, chloroplastic OS=Arabidopsis thaliana GN=PGMP PE=1 SV=2	PGMP
MD00G1004300	0.10921	0.012663	0.00781225	0	1.95349	10.7171	-2.4558	0.1097	0.39559	FALSE	1.07232	12.0338	-3.4883	0.0308	0.14506	FALSE	0	11.1357	#NAME?	0.0057439	0.045687	DOWN	--	--	0
MD00G1004400	0.294562	1.1573	1.90114	0.240714	32.3355	5.41738	2.5774	0.23236	0.57849	FALSE	52.7472	6.08555	3.1156	1.38e-05	0.00037907	UP	6.21823	5.64589	0.1393	0.87341	1	FALSE	sp|Q9FIS1|AGL42_ARATH	MADS-box protein AGL42 OS=Arabidopsis thaliana GN=AGL42 PE=2 SV=1	AGL42
MD00G1005300	1.76221	34.4423	48.1513	131.389	620.354	18.6052	5.0593	0.0037752	0.050998	FALSE	826.485	20.9156	5.3043	0.086248	0.28685	FALSE	2141.02	19.4362	6.7834	0.00018957	0.0029077	UP	--	--	0
MD00G1005700	336.048	256.025	75.0992	126.682	23909.3	18918.1	0.3378	0.83373	1	FALSE	6369.75	21248.2	-1.738	0.00038019	0.0055664	DOWN	10567.3	19708.4	-0.89921	0.016511	0.10202	FALSE	sp|Q9FJ95|DHSO_ARATH	Sorbitol dehydrogenase OS=Arabidopsis thaliana GN=SDH PE=1 SV=1	SDH
MD00G1006700	11.9855	30.5205	40.9955	46.3483	5100.63	1357.12	1.9101	0.025488	0.17217	FALSE	7202.85	1524.41	2.2403	0.001579	0.016862	UP	7811.79	1412.82	2.4671	3.15e-08	1.55e-06	UP	sp|Q9FXF2|RKF1_ARATH	Probable LRR receptor-like serine/threonine-protein kinase RFK1 OS=Arabidopsis thaliana GN=RKF1 PE=1 SV=1	RKF1
MD00G1007000	21.0177	132.195	115.116	89.5411	22643.3	2244.07	3.3349	1.53e-07	3e-05	UP	19181	2520.97	2.9276	0.00033403	0.0050314	UP	14236	2335.91	2.6075	6.85e-08	3.05e-06	UP	sp|Q9FXF2|RKF1_ARATH	Probable LRR receptor-like serine/threonine-protein kinase RFK1 OS=Arabidopsis thaliana GN=RKF1 PE=1 SV=1	RKF1
MD00G1008200	2.64471	0.424862	0.813616	0.924722	95.3207	403.227	-2.0807	0.00043411	0.01129	DOWN	183.657	452.737	-1.3017	0.00054901	0.0073809	DOWN	205.811	419.293	-1.0266	0.017517	0.10628	FALSE	sp|F4JRP0|STIL3_ARATH	Protein STICHEL-like 3 OS=Arabidopsis thaliana GN=At4g18820 PE=3 SV=1	At4g18820
MD00G1009000	78.7481	241.064	220.508	140.465	26510.9	5588.9	2.2459	2.89e-05	0.0015442	UP	23831.6	6276.07	1.9249	1.56e-08	1.2e-06	UP	14636.7	5812.14	1.3325	0.015017	0.095191	FALSE	sp|Q9FFF4|ILVH1_ARATH	Acetolactate synthase small subunit 1, chloroplastic OS=Arabidopsis thaliana GN=VAT1 PE=1 SV=1	VAT1
MD00G1009200	19.0292	33.0314	70.5868	77.3037	482.941	186.138	1.3755	0.0094831	0.092883	FALSE	1014.86	209.199	2.2783	0.0054558	0.042159	UP	1099.77	194.867	2.4966	0.00053769	0.0068706	UP	--	--	0
MD00G1009800	2.1118	1.11145	0.753636	0.356109	202.682	238.695	-0.23595	0.51457	0.83744	FALSE	124.816	268.02	-1.1025	0.008557	0.05813	FALSE	58.6679	248.574	-2.083	2e-05	0.00043614	DOWN	sp|Q54Q39|PP1R7_DICDI	Protein phosphatase 1 regulatory subunit pprA OS=Dictyostelium discoideum GN=pprA PE=3 SV=1	pprA
MD11G1112000	0.112975	77.5737	25.8689	230.59	4007.4	3.40535	10.201	6.17e-06	0.00049011	UP	1285.87	3.82109	8.3945	0.027942	0.1354	FALSE	11157.7	3.53519	11.624	0.002924	0.026931	UP	sp|Q41350|OLP1_SOLLC	Osmotin-like protein OS=Solanum lycopersicum PE=1 SV=1	1
MD00G1012100	0.316398	0.0160437	0.0845976	0.0644163	2.35184	33.06	-3.8132	0.0019137	0.032163	DOWN	12.4853	37.1476	-1.573	0.10618	0.3276	FALSE	9.62983	34.4159	-1.8375	0.057532	0.24881	FALSE	sp|C0LGP4|Y3475_ARATH	Probable LRR receptor-like serine/threonine-protein kinase At3g47570 OS=Arabidopsis thaliana GN=At3g47570 PE=2 SV=1	At3g47570
MD11G1002600	0.564459	0.377643	1.49653	4.62047	32.5562	33.345	-0.034541	0.93643	1	FALSE	132.66	37.4517	1.8246	0.055873	0.21551	FALSE	403.973	34.7107	3.5408	1.04e-12	1.6e-10	UP	sp|Q9FM85|PBL16_ARATH	Probable serine/threonine-protein kinase PBL16 OS=Arabidopsis thaliana GN=PBL16 PE=2 SV=1	PBL16
MD00G1012800	0.00650538	0.0754481	0.327219	0.743271	9.0531	0.499849	4.1788	0.23643	0.58324	FALSE	41.3708	0.562054	6.2018	0.12006	0.35499	FALSE	86.2138	0.523202	7.3644	3.88e-06	0.00010591	UP	sp|P52707|MDL3_PRUSE	(R)-mandelonitrile lyase 3 OS=Prunus serotina GN=MDL3 PE=2 SV=1	MDL3
MD00G1012900	0.0104853	2.93179	12.501	37.1751	319.114	0.721938	8.788	0.063527	0.29337	FALSE	1428.98	0.810799	10.783	0.022602	0.11674	FALSE	3899.24	0.748023	12.348	1.52e-09	1.1e-07	UP	sp|Q945K2|MDL2_PRUDU	(R)-mandelonitrile lyase 2 OS=Prunus dulcis GN=MDL2 PE=1 SV=1	MDL2
MD00G1013000	0.309533	0.977515	4.56763	32.8059	107.339	21.9025	2.293	0.17977	0.50941	FALSE	524.856	24.6178	4.4141	0.13281	0.3775	FALSE	3373.79	22.9575	7.1993	4.61e-05	0.00088465	UP	sp|Q945K2|MDL2_PRUDU	(R)-mandelonitrile lyase 2 OS=Prunus dulcis GN=MDL2 PE=1 SV=1	MDL2
MD11G1029400	17.9208	2.52327	6.32522	10.4031	168.86	861.757	-2.3515	7.53e-05	0.0031029	DOWN	444.986	967.97	-1.1212	0.0017904	0.018543	DOWN	715.224	897.715	-0.32786	0.61384	0.92497	FALSE	sp|Q940Q3|ZTP29_ARATH	Zinc transporter ZTP29 OS=Arabidopsis thaliana GN=ZTP29 PE=2 SV=1	ZTP29
MD00G1014300	39.8632	4.78063	3.63574	2.35887	283.464	1574.55	-2.4737	1.38e-05	0.00088286	DOWN	215.133	1768.02	-3.0388	6.24e-15	2.04e-12	DOWN	131.543	1636.22	-3.6368	2.84e-15	7.26e-13	DOWN	sp|Q8W3M4|Y4744_ARATH	Uncharacterized protein At4g06744 OS=Arabidopsis thaliana GN=At4g06744 PE=2 SV=1	At4g06744
MD00G1014400	40.5659	4.32423	3.45941	1.86675	64.0752	406.677	-2.666	8.87e-06	0.00064474	DOWN	51.4713	456.533	-3.1489	2.13e-11	3.54e-09	DOWN	26.4515	422.519	-3.9976	1.4e-14	3.16e-12	DOWN	--	--	0
MD00G1018400	34.0347	11.1914	7.22086	5.47419	454.457	847.675	-0.89937	0.093325	0.36213	FALSE	269.433	951.657	-1.8205	0.0025519	0.02409	DOWN	192.971	882.285	-2.1929	0.00053554	0.006856	DOWN	--	--	0
MD00G1018700	155.169	465.538	535.431	515.84	23100.7	4870.86	2.2457	7.86e-05	0.0032016	UP	25788.3	5473.19	2.2363	7.88e-08	4.87e-06	UP	24086.8	5081.31	2.245	9.06e-08	3.92e-06	UP	sp|P07803|HBL_TRETO	Non-symbiotic hemoglobin OS=Trema tomentosa GN=GLB1 PE=1 SV=1	GLB1
MD00G1018800	8.83256	213.217	186.493	120.575	5252.32	130.416	5.3318	1.01e-05	0.00070584	UP	4260.61	146.621	4.8609	3.61e-07	1.79e-05	UP	2693.32	136.417	4.3033	0.00052555	0.0067533	UP	sp|Q947C5|HBL1_GOSHI	Non-symbiotic hemoglobin 1 OS=Gossypium hirsutum GN=HB1 PE=2 SV=1	HB1
MD00G1019100	9.66648	2.98114	3.28298	4.23517	270.771	582.483	-1.1051	0.043972	0.23949	FALSE	292.659	654.15	-1.1604	0.0016396	0.017378	DOWN	369.634	606.206	-0.71371	0.10169	0.3641	FALSE	sp|O48845|CYB5B_ARATH	Cytochrome b5 isoform B OS=Arabidopsis thaliana GN=CYTB5-B PE=1 SV=1	CYTB5-B
MD00G1023000	5.17289	0.986236	1.18358	2.46792	52.8285	186.053	-1.8163	0.0054924	0.065222	FALSE	65.0167	208.942	-1.6842	5.34e-05	0.0011558	DOWN	130.96	193.705	-0.56474	0.19465	0.53719	FALSE	sp|Q6NPM5|ATS3B_ARATH	Embryo-specific protein ATS3B OS=Arabidopsis thaliana GN=ATS3B PE=1 SV=1	ATS3B
MD00G1023600	7.82834	2.687	2.59159	2.80221	414.594	733.754	-0.8236	0.078479	0.33004	FALSE	358.913	824.095	-1.1992	0.00085857	0.01051	DOWN	390.575	763.144	-0.96636	0.013297	0.086634	FALSE	sp|C0LGH2|Y1561_ARATH	Probable LRR receptor-like serine/threonine-protein kinase At1g56130 OS=Arabidopsis thaliana GN=At1g56130 PE=2 SV=2	At1g56130
MD00G1025800	9.63046	4.88698	3.71086	7.28817	633.412	728.596	-0.20198	0.5812	0.88308	FALSE	433.751	818.367	-0.91588	0.0055807	0.042808	DOWN	815.18	758.938	0.10314	0.89037	1	FALSE	sp|O48780|KCS11_ARATH	3-ketoacyl-CoA synthase 11 OS=Arabidopsis thaliana GN=KCS11 PE=1 SV=1	KCS11
MD00G1030000	7.30489	1.37238	3.28859	3.62832	194.217	750.76	-1.9507	0.000867	0.018557	DOWN	494.87	843.178	-0.76879	0.03882	0.16904	FALSE	539.549	781.476	-0.53445	0.22358	0.58048	FALSE	sp|Q9XI07|SWI3C_ARATH	SWI/SNF complex subunit SWI3C OS=Arabidopsis thaliana GN=SWI3C PE=1 SV=1	SWI3C
MD00G1033400	7.84477	1.81259	1.95287	3.34616	120.502	343.74	-1.5123	0.009211	0.091137	FALSE	126.783	386.005	-1.6063	3.8e-05	0.00087178	DOWN	206.399	358.074	-0.79483	0.21232	0.56418	FALSE	sp|Q9FJH5|HIP3_ARATH	Heavy metal-associated isoprenylated plant protein 3 OS=Arabidopsis thaliana GN=HIPP03 PE=1 SV=1	HIPP03
MD00G1033500	1.65366	0.255163	0.645729	0.379447	19.4588	98.0182	-2.3326	0.0016573	0.02924	DOWN	54.035	110.046	-1.0261	0.10898	0.33337	FALSE	30.93	101.862	-1.7195	0.006885	0.052558	FALSE	sp|Q2RQX6|RL18_RHORT	50S ribosomal protein L18 OS=Rhodospirillum rubrum (strain ATCC 11170 / ATH 1.1.1 / DSM 467 / LMG 4362 / NCIB 8255 / S1) GN=rplR PE=3 SV=1	rplR
MD00G1033800	0.222246	1.98787	0.876754	0.180579	39.2373	2.68171	3.871	0.0002544	0.0076348	UP	16.3307	3.01042	2.4395	0.040997	0.17515	FALSE	3.00542	2.7865	0.10911	0.93557	1	FALSE	sp|F4J4C8|EVN_ARATH	Dolichol kinase EVAN OS=Arabidopsis thaliana GN=EVN PE=2 SV=1	EVN
MD11G1068000	10.4259	4.19074	2.4103	1.71791	319.89	497.6	-0.63741	0.19118	0.52631	FALSE	172.753	558.801	-1.6936	9.11e-06	0.00026888	DOWN	119.031	518.073	-2.1218	2.62e-06	7.56e-05	DOWN	sp|O64738|ZIP6_ARATH	Zinc transporter 6, chloroplastic OS=Arabidopsis thaliana GN=ZIP6 PE=3 SV=1	ZIP6
MD00G1035000	4.00141	10.6128	14.3658	22.8495	1413.45	360.267	1.9721	0.019686	0.14748	FALSE	1957.12	404.582	2.2742	1e-10	1.46e-08	UP	3027.53	375.19	3.0124	2.96e-12	4.15e-10	UP	sp|Q9SZY3|SBT38_ARATH	Subtilisin-like protease SBT3.8 OS=Arabidopsis thaliana GN=SBT3.8 PE=3 SV=1	SBT3.8
MD00G1035200	0	0.0108219	0.00877759	0	0.568667	0	Inf	0.94415	1	FALSE	0.371577	0	Inf	0.96342	1	FALSE	0	0	NA	NA	NA	NA	sp|P17859|AMYA_VIGMU	Alpha-amylase OS=Vigna mungo GN=AMY1.1 PE=2 SV=1	AMY1.1
MD00G1035800	0.314309	0.0144065	0	0.0062093	0.976744	13.5658	-3.7959	0.019914	0.14852	FALSE	0	15.238	#NAME?	0.00052478	0.007128	DOWN	0.364877	14.1429	-5.2765	0.0052372	0.042421	DOWN	--	--	0
MD00G1036100	2.41874	1.12647	0.62404	0.262932	106.662	165.576	-0.63446	0.48225	0.81403	FALSE	64.1055	185.954	-1.5364	0.048931	0.19728	FALSE	25.1888	172.676	-2.7772	0.00048922	0.0063466	DOWN	sp|Q9ZNR0|C78A6_ARATH	Cytochrome P450 78A6 OS=Arabidopsis thaliana GN=CYP78A6 PE=2 SV=1	CYP78A6
MD00G1036600	27.107	4.50869	8.36054	3.82448	77.8686	342.402	-2.1366	0.00042338	0.011113	DOWN	150.427	384.582	-1.3542	0.0016362	0.017355	DOWN	68.3776	356.775	-2.3834	1.27e-06	4.05e-05	DOWN	sp|Q9ZUZ3|SAU32_ARATH	Auxin-responsive protein SAUR32 OS=Arabidopsis thaliana GN=SAUR32 PE=2 SV=1	SAUR32
MD09G1140300	47.6053	1.36835	4.70974	7.89841	95.2482	2380.26	-4.6433	1.37e-05	0.00087747	DOWN	330.202	2673.53	-3.0173	0.0013554	0.014997	DOWN	577.911	2485.03	-2.1043	0.011667	0.078547	FALSE	sp|O23039|ZIP5_ARATH	Zinc transporter 5 OS=Arabidopsis thaliana GN=ZIP5 PE=2 SV=1	ZIP5
MD00G1037100	14.0917	1.34807	3.94546	13.9622	150.598	1039.83	-2.7876	1.87e-06	0.00019782	DOWN	451.762	1167.74	-1.3701	5.86e-05	0.0012438	DOWN	1477.35	1081.74	0.44965	0.33511	0.71479	FALSE	sp|P27608|AROF_TOBAC	Phospho-2-dehydro-3-deoxyheptonate aldolase 1, chloroplastic OS=Nicotiana tabacum GN=DHAPS-1 PE=2 SV=1	DHAPS-1
MD00G1037500	0	0.202866	0.332225	0.448865	10.61	0	Inf	0.16396	0.48619	FALSE	19.5415	0	Inf	0.00039556	0.0057278	UP	25.6008	0	Inf	0.00027687	0.0039977	UP	sp|O49859|C82A4_SOYBN	Cytochrome P450 82A4 OS=Glycine max GN=CYP82A4 PE=2 SV=1	CYP82A4
MD00G1038300	0.252872	1.68347	3.15047	10.6973	222.743	21.1095	3.3994	0.092283	0.36011	FALSE	418.312	23.7255	4.1401	0.046098	0.18908	FALSE	1366.89	22.0542	5.9537	2.27e-05	0.00048571	UP	sp|Q8RY67|WAKLO_ARATH	Wall-associated receptor kinase-like 14 OS=Arabidopsis thaliana GN=WAKL14 PE=2 SV=2	WAKL14
MD00G1038500	13.6689	3.87808	4.28547	4.19533	238.721	586.255	-1.2962	0.021538	0.15621	FALSE	270.837	658.233	-1.2812	0.002197	0.021507	DOWN	261.292	608.8	-1.2203	0.0044724	0.037566	DOWN	--	--	0
MD00G1039300	5.15625	7.50312	8.09609	7.0464	880.087	385.355	1.1915	0.028876	0.18624	FALSE	920.721	432.884	1.0888	0.0020056	0.020126	UP	775.593	402.101	0.94774	0.026813	0.14508	FALSE	sp|Q84RR2|ARI2_ARATH	Probable E3 ubiquitin-protein ligase ARI2 OS=Arabidopsis thaliana GN=ARI2 PE=2 SV=1	ARI2
MD00G1039900	5.69461	6.35542	8.3182	13.8098	364.938	204.717	0.83402	0.1548	0.47135	FALSE	440.023	230.012	0.93587	0.13168	0.37529	FALSE	730.261	213.532	1.774	4.12e-05	0.00080554	UP	sp|C0SVM5|BBX19_ARATH	B-box zinc finger protein 19 OS=Arabidopsis thaliana GN=BBX19 PE=2 SV=1	BBX19
MD00G1040600	5.91127	9.52701	8.73086	11.4334	649.474	239.989	1.4363	0.11541	0.40545	FALSE	547.508	269.584	1.0221	0.15158	0.41006	FALSE	692.464	249.959	1.47	0.0022151	0.021445	UP	sp|Q9GZT6|CC90B_HUMAN	Coiled-coil domain-containing protein 90B, mitochondrial OS=Homo sapiens GN=CCDC90B PE=1 SV=2	CCDC90B
MD09G1140500	177.215	4.42643	12.7244	26.4108	341.379	9962.51	-4.8671	2.46e-15	1e-11	DOWN	1018.92	11188.4	-3.4569	3.45e-21	5.03e-18	DOWN	2077.1	10368.8	-2.3196	1.07e-07	4.55e-06	DOWN	sp|O23039|ZIP5_ARATH	Zinc transporter 5 OS=Arabidopsis thaliana GN=ZIP5 PE=2 SV=1	ZIP5
MD00G1041300	1.70447	0.130531	0.276035	0.184318	11.3896	93.6057	-3.0389	0.00068224	0.015621	DOWN	22.5094	105.202	-2.2246	0.0053778	0.041746	DOWN	14.4807	97.7245	-2.7546	0.0025353	0.023887	DOWN	sp|Q9SD53|Y3720_ARATH	UPF0481 protein At3g47200 OS=Arabidopsis thaliana GN=At3g47200 PE=2 SV=1	At3g47200
MD00G1041800	0	0.0293092	0.369689	0	0.751741	0	Inf	0.76843	0.97748	FALSE	8.05856	0	Inf	0.18538	0.46402	FALSE	0	0	NA	NA	NA	NA	--	--	0
MD00G1045700	0.592494	1.3567	4.2706	24.0824	82.6456	21.7189	1.928	0.16521	0.48805	FALSE	249.078	24.3986	3.3517	0.14293	0.39529	FALSE	1312.22	22.6482	5.8565	4.5e-05	0.00086721	UP	sp|Q9SLN8|DBR_TOBAC	2-alkenal reductase (NADP(+)-dependent) OS=Nicotiana tabacum GN=DBR PE=1 SV=1	DBR
MD15G1059800	0.803034	0.155566	0.148192	0.60083	14.0758	49.4428	-1.8125	0.02914	0.18744	FALSE	13.6166	55.5414	-2.0282	0.0017994	0.018606	DOWN	52.88	51.5774	0.035982	0.84153	1	FALSE	sp|O04089|ZIP4_ARATH	Zinc transporter 4, chloroplastic OS=Arabidopsis thaliana GN=ZIP4 PE=2 SV=1	ZIP4
MD00G1046500	11.7852	21.8068	18.3459	13.3071	1468.78	490.998	1.5808	0.0054331	0.064858	FALSE	1152.6	551.148	1.0644	0.0022211	0.021696	UP	814.71	510.282	0.67499	0.24452	0.60821	FALSE	sp|Q5XF36|KMS1_ARATH	Vacuole membrane protein KMS1 OS=Arabidopsis thaliana GN=KMS1 PE=1 SV=1	KMS1
MD03G1190300	0.550761	0.788796	5.71179	9.34955	46.1435	20.8317	1.1473	0.39906	0.75021	FALSE	355.377	23.4122	3.924	0.22855	0.52554	FALSE	531.72	21.7558	4.6112	1.21e-07	5.1e-06	UP	sp|Q9SEE4|PIRL_SOLLC	Pirin-like protein OS=Solanum lycopersicum PE=2 SV=1	2
MD00G1050600	10.3601	2.96932	3.91198	5.81952	229.549	509.956	-1.1516	0.030613	0.19313	FALSE	290.96	572.708	-0.97698	0.006164	0.045942	DOWN	421.282	530.361	-0.33219	0.38665	0.76587	FALSE	--	--	0
MD00G1051300	33.9625	146.409	61.129	109.431	23626.1	3130.57	2.9159	0.11044	0.39688	FALSE	8697.69	3515.78	1.3068	0.017025	0.095561	FALSE	14974.2	3259.91	2.1996	1.86e-07	7.42e-06	UP	sp|Q56XP4|NHX2_ARATH	Sodium/hydrogen exchanger 2 OS=Arabidopsis thaliana GN=NHX2 PE=2 SV=2	NHX2
MD10G1056700	0.272706	0.459136	0.692838	1.54866	54.3657	19.805	1.4568	0.090807	0.35723	FALSE	81.3039	22.2376	1.8703	0.38458	0.70511	FALSE	171.265	20.5973	3.0557	0.0054942	0.044034	UP	sp|Q7N3Y5|ZNTB_PHOLL	Zinc transport protein ZntB OS=Photorhabdus luminescens subsp. laumondii (strain DSM 15139 / CIP 105565 / TT01) GN=zntB PE=3 SV=1	zntB
MD00G1053300	2.93562	0.730819	0.997727	0.965775	136.277	380.694	-1.4821	0.012828	0.11274	FALSE	188.598	427.546	-1.1808	0.002387	0.022904	DOWN	176.969	396.055	-1.1622	0.016753	0.10313	FALSE	sp|Q9LRE6|DPOD1_ORYSJ	DNA polymerase delta catalytic subunit OS=Oryza sativa subsp. japonica GN=POLD1 PE=2 SV=1	POLD1
MD00G1054300	0.721479	3.74982	2.75691	6.55144	40.2272	4.86016	3.0491	0.00098154	0.020275	UP	28.8632	5.45906	2.4025	0.008236	0.056651	FALSE	67.5369	5.04845	3.7418	0.0030303	0.027687	UP	--	--	0
MD00G1054500	9.07217	14.687	19.267	48.2991	1844.03	705.059	1.387	0.0534	0.26647	FALSE	2379.98	791.853	1.5876	0.20773	0.49579	FALSE	5693.41	733.82	2.9558	0.0019341	0.019232	UP	sp|Q9LF46|HACL_ARATH	2-hydroxyacyl-CoA lyase OS=Arabidopsis thaliana GN=HACL PE=1 SV=1	HACL
MD16G1043000	27.9974	10.2763	16.4788	6.85687	967.561	1733.67	-0.84141	0.10002	0.37543	FALSE	1465.14	1946.08	-0.40953	0.54201	0.83626	FALSE	610.548	1801.61	-1.5611	0.0006942	0.0084678	DOWN	sp|Q8LG76|COL6_ARATH	Zinc finger protein CONSTANS-LIKE 6 OS=Arabidopsis thaliana GN=COL6 PE=2 SV=2	COL6
MD00G1056400	4.07043	0.485393	1.17686	1.22557	18.2108	105.957	-2.5406	0.00049108	0.012383	DOWN	44.3589	118.993	-1.4236	0.0046858	0.037785	DOWN	46.7269	110.234	-1.2382	0.020312	0.11867	FALSE	--	--	0
MD00G1057800	9.46745	1.8632	2.34522	2.44057	255.232	905.557	-1.827	0.0016162	0.028701	DOWN	328.542	1016.93	-1.6301	7.9e-06	0.00023908	DOWN	337.099	941.998	-1.4826	0.00055852	0.0070883	DOWN	sp|Q9FZD9|DUF3_ARATH	DUF724 domain-containing protein 3 OS=Arabidopsis thaliana GN=DUF3 PE=1 SV=1	DUF3
MD00G1058100	1.29662	0.996121	0.554698	0.116028	38.3178	34.184	0.16469	0.8161	0.99804	FALSE	21.9224	38.4007	-0.80873	0.25848	0.56451	FALSE	4.30744	35.6772	-3.0501	0.0013499	0.014417	DOWN	sp|Q9M2K6|PDCB5_ARATH	PLASMODESMATA CALLOSE-BINDING PROTEIN 5 OS=Arabidopsis thaliana GN=PDCB5 PE=1 SV=2	PDCB5
MD00G1058300	0.746675	0.219787	0.118148	0.04161	11.3935	28.9053	-1.3431	0.18278	0.51427	FALSE	6.47634	32.4393	-2.3245	0.0083872	0.057305	FALSE	2.18926	30.001	-3.7765	0.00067479	0.0082652	DOWN	sp|A7R385|CSPLC_VITVI	CASP-like protein 2B1 OS=Vitis vinifera GN=GSVIVT00013502001 PE=2 SV=1	GSVIVT00013502001
MD00G1059100	19.0082	26.7873	29.2474	22.6072	2584.3	1168.54	1.1451	0.03786	0.21967	FALSE	2722.97	1312.21	1.0532	0.0020885	0.020715	UP	2032.45	1216.09	0.74097	0.069891	0.28345	FALSE	--	--	0
MD00G1059700	1.43147	11.5659	17.176	21.6905	445.668	34.8067	3.6785	8.36e-06	0.00061608	UP	660.98	39.1073	4.0791	0.0020001	0.020086	UP	800.017	36.3023	4.4619	0.0008767	0.010229	UP	sp|O64967|HMDH2_GOSHI	3-hydroxy-3-methylglutaryl-coenzyme A reductase 2 OS=Gossypium hirsutum GN=HMG2 PE=3 SV=1	HMG2
MD00G1060400	6.48554	0.84129	1.17495	2.15711	53.2005	285.556	-2.4243	7.51e-05	0.0030996	DOWN	77.936	320.546	-2.0402	3.78e-05	0.00086739	DOWN	145.524	296.476	-1.0267	0.02757	0.14809	FALSE	sp|Q6NM73|CRRS3_ARATH	Cysteine-rich repeat secretory protein 3 OS=Arabidopsis thaliana GN=CRRSP3 PE=1 SV=1	CRRSP3
MD01G1220400	193.583	23.6782	29.9159	22.3163	1590.8	9360.17	-2.5568	6.98e-06	0.00053922	DOWN	2113.32	10513.9	-2.3147	5.53e-11	8.55e-09	DOWN	1542.68	9750.02	-2.66	5.14e-10	4.22e-08	DOWN	sp|Q9FHH8|COL5_ARATH	Zinc finger protein CONSTANS-LIKE 5 OS=Arabidopsis thaliana GN=COL5 PE=2 SV=2	COL5
MD00G1061200	0.66236	0.0184028	0.00881596	0.200594	2.85654	80.8446	-4.8228	0.0028637	0.042058	DOWN	1.5429	90.8898	-5.8804	0.00056196	0.007488	DOWN	34.3982	84.5154	-1.2969	0.3382	0.71779	FALSE	sp|Q9LP24|Y1571_ARATH	Probable leucine-rich repeat receptor-like protein kinase At1g35710 OS=Arabidopsis thaliana GN=At1g35710 PE=2 SV=1	At1g35710
MD00G1062300	0.699421	0.494595	0.080037	0.391355	65.7826	52.1704	0.33447	0.99718	1	FALSE	9.18267	58.6085	-2.6741	8.53e-05	0.0016889	DOWN	44.0488	54.4272	-0.30522	0.49244	0.85173	FALSE	sp|Q9SR96|DNJ63_ARATH	DnaJ protein ERDJ3A OS=Arabidopsis thaliana GN=ERDJ3A PE=1 SV=1	ERDJ3A
MD00G1063000	1.39459	0.168422	0.152955	0.135748	25.768	147.537	-2.5174	0.00018449	0.0060733	DOWN	23.3774	165.75	-2.8258	3.3e-08	2.28e-06	DOWN	20.4983	153.905	-2.9085	5.1e-07	1.81e-05	DOWN	sp|C0LGP4|Y3475_ARATH	Probable LRR receptor-like serine/threonine-protein kinase At3g47570 OS=Arabidopsis thaliana GN=At3g47570 PE=2 SV=1	At3g47570
MD00G1063500	0.684138	9.83224	8.6307	17.2934	1051.6	42.4801	4.6297	0.0050584	0.061797	FALSE	879.327	47.7388	4.2032	0.16066	0.42498	FALSE	1628.64	44.3181	5.1996	9.43e-07	3.11e-05	UP	sp|O04086|Y1105_ARATH	Probable receptor-like protein kinase At1g11050 OS=Arabidopsis thaliana GN=At1g11050 PE=2 SV=1	At1g11050
MD00G1063600	0.259045	0.0660013	1.30901	11.835	1.94377	5.35769	-1.4628	0.64591	0.91978	FALSE	41.8374	6.02224	2.7964	0.13413	0.37987	FALSE	334.977	5.63347	5.8939	0.0030191	0.027598	UP	sp|Q9SSK9|MLP28_ARATH	MLP-like protein 28 OS=Arabidopsis thaliana GN=MLP28 PE=1 SV=1	MLP28
MD00G1064800	9.57533	1.39618	2.72657	4.3176	84.7624	385.391	-2.1848	0.0002099	0.0066646	DOWN	161.648	432.831	-1.4209	0.00022716	0.0037336	DOWN	248.158	401.085	-0.69265	0.15514	0.4725	FALSE	sp|P73848|FABZ_SYNY3	3-hydroxyacyl-[acyl-carrier-protein] dehydratase FabZ OS=Synechocystis sp. (strain PCC 6803 / Kazusa) GN=fabZ PE=3 SV=2	fabZ
MD00G1065200	1.71278	2.59056	2.75035	1.86848	352.936	153.452	1.2016	0.029182	0.18759	FALSE	372.33	172.313	1.1116	0.0032065	0.028637	UP	242.009	159.513	0.60138	0.16216	0.48494	FALSE	sp|H2DH17|C7A22_PANGI	Cytochrome P450 CYP749A22 OS=Panax ginseng PE=2 SV=1	2
MD00G1065300	1.40221	2.55109	1.64111	2.70848	430.876	136.94	1.6537	0.33931	0.69422	FALSE	232.951	153.76	0.59934	0.31108	0.62771	FALSE	379.241	142.423	1.4129	0.00088813	0.010331	UP	sp|Q84WU2|UBP13_ARATH	Ubiquitin carboxyl-terminal hydrolase 13 OS=Arabidopsis thaliana GN=UBP13 PE=2 SV=1	UBP13
MD00G1067200	22.2919	3.55818	8.37435	7.13369	88.3287	386.604	-2.1299	0.00028264	0.0082634	DOWN	211.072	434.126	-1.0404	0.032927	0.15183	FALSE	174.282	402.791	-1.2086	0.040259	0.19472	FALSE	sp|O65695|SAU50_ARATH	Auxin-responsive protein SAUR50 OS=Arabidopsis thaliana GN=SAUR50 PE=1 SV=1	SAUR50
MD04G1033300	2.49257	7.51374	13.1959	27.8041	588.346	122.996	2.2581	0.31435	0.6702	FALSE	1057.69	138.23	2.9358	0.2846	0.59595	FALSE	2100.73	128.82	4.0275	0.0040433	0.034728	UP	sp|Q9SEE4|PIRL_SOLLC	Pirin-like protein OS=Solanum lycopersicum PE=2 SV=1	2
MD00G1070100	0.141496	0.591614	1.02332	0.136861	43.0111	6.46011	2.7351	0.0065881	0.073302	FALSE	67.9014	7.25798	3.2258	0.00040076	0.0057833	UP	8.97207	6.74796	0.41099	0.71638	0.97125	FALSE	sp|Q9SU30|CPR30_ARATH	F-box protein CPR30 OS=Arabidopsis thaliana GN=CPR30 PE=1 SV=2	CPR30
MD04G1198600	0.0499223	0.0319559	0.119071	0.6828	0.976744	0.972713	0.0059652	1	1	FALSE	3.79284	1.09176	1.7966	0.58799	0.86858	FALSE	20.0959	1.00996	4.3145	0.0012265	0.013366	UP	sp|P37216|AROG_SOLLC	Phospho-2-dehydro-3-deoxyheptonate aldolase 2, chloroplastic OS=Solanum lycopersicum PE=2 SV=1	2
MD00G1071800	1.60747	0.455116	0.418634	0.10807	25.1133	63.7265	-1.3434	0.075833	0.3246	FALSE	23.9258	71.5914	-1.5812	0.014337	0.084805	FALSE	6.18174	66.5295	-3.4279	1.81e-05	0.00040151	DOWN	sp|Q7XLY8|ATL41_ORYSJ	E3 ubiquitin-protein ligase Os04g0590900 OS=Oryza sativa subsp. japonica GN=Os04g0590900 PE=2 SV=2	Os04g0590900
MD09G1000400	32.0269	71.8917	79.9922	131.162	12798.5	3551.04	1.8497	0.00063577	0.014832	UP	13810.3	3988.34	1.7919	0.031079	0.14591	FALSE	21638.7	3695.9	2.5496	1.08e-08	6.08e-07	UP	sp|B9DGD6|ACS_ARATH	Acetyl-coenzyme A synthetase, chloroplastic/glyoxysomal OS=Arabidopsis thaliana GN=ACS PE=1 SV=1	ACS
MD00G1072500	1.17565	0.136683	0.108384	0.149416	8.97377	49.6923	-2.4692	0.00258	0.039484	DOWN	6.63895	55.7851	-3.0709	3.33e-05	0.00078066	DOWN	9.15067	51.6248	-2.4961	0.00097744	0.01118	DOWN	sp|Q0JKZ0|SNL6_ORYSJ	Cinnamoyl-CoA reductase-like SNL6 OS=Oryza sativa subsp. japonica GN=SNL6 PE=3 SV=1	SNL6
MD00G1072600	0.290407	0.271692	0.494305	2.535	12.6901	8.29309	0.61372	0.55467	0.86529	FALSE	20.8495	9.32202	1.1613	0.23754	0.53731	FALSE	107.25	8.68951	3.6256	4.43e-06	0.00011871	UP	--	--	0
MD00G1073400	16.7691	2.9734	3.95927	5.13305	160.936	678.677	-2.0762	0.00047844	0.012126	DOWN	239.721	761.877	-1.6682	5.14e-06	0.00016676	DOWN	300.744	705.07	-1.2292	0.004101	0.035063	DOWN	sp|Q8LGS1|MARD1_ARATH	Protein MARD1 OS=Arabidopsis thaliana GN=MARD1 PE=2 SV=2	MARD1
MD00G1073900	24.0469	53.5422	45.4339	27.1956	1002.32	282.852	1.8252	0.00090261	0.019098	UP	826.084	317.812	1.3781	0.12285	0.35957	FALSE	480.288	294.941	0.70347	0.47146	0.83619	FALSE	--	--	0
MD00G1075100	2.49526	0.231192	0.379938	0.730731	25.6299	194.894	-2.9268	1.07e-05	0.00073683	DOWN	44.6015	218.827	-2.2946	2.94e-07	1.5e-05	DOWN	82.285	202.693	-1.3006	0.0085536	0.06221	FALSE	sp|Q8L7S4|MP702_ARATH	Microtubule-associated protein 70-2 OS=Arabidopsis thaliana GN=MAP70.2 PE=1 SV=1	MAP70.2
MD00G1075300	18.7473	99.2229	62.3724	97.857	6912.36	770.671	3.165	0.010033	0.096513	FALSE	4025.87	865.582	2.2176	0.019767	0.10619	FALSE	6018.94	801.875	2.9081	8.43e-07	2.82e-05	UP	sp|Q9ZQH1|CML48_ARATH	Probable calcium-binding protein CML48 OS=Arabidopsis thaliana GN=CML48 PE=2 SV=2	CML48
MD00G1075400	6.20441	25.9267	64.4941	211.543	2465.09	374.563	2.7184	0.21534	0.55652	FALSE	6129.34	421.016	3.8638	0.033612	0.15406	FALSE	19374.5	391.366	5.6295	9.79e-07	3.22e-05	UP	sp|Q9ZQG9|E1314_ARATH	Glucan endo-1,3-beta-glucosidase 14 OS=Arabidopsis thaliana GN=At2g27500 PE=1 SV=2	At2g27500
MD00G1075500	106.351	113.308	146.151	191.978	6105.14	3715.02	0.71665	0.13701	0.44387	FALSE	7749.64	4172.75	0.89313	0.009059	0.060604	FALSE	9968.96	3866.39	1.3665	0.001241	0.01347	UP	sp|Q9ZQG8|FER3_ARATH	Ferredoxin-3, chloroplastic OS=Arabidopsis thaliana GN=FD3 PE=1 SV=1	FD3
MD00G1075600	0.0102269	0.0786859	0.443856	0.682923	3.19976	0.257096	3.6376	0.28511	0.64027	FALSE	18.5463	0.289081	6.0035	0.2078	0.49586	FALSE	26.1335	0.27088	6.5921	0.0006842	0.0083682	UP	--	--	0
MD00G1076100	16.7539	15.8749	3.99701	3.75293	447.335	281.16	0.66996	0.63238	0.91168	FALSE	100.589	315.646	-1.6498	2.92e-05	0.0007033	DOWN	91.3864	292.118	-1.6765	0.00034536	0.0047832	DOWN	--	--	0
MD00G1076300	212.386	23.4964	46.3249	104.095	2468.74	14766	-2.5804	4.24e-06	0.00037377	DOWN	4886.82	16584.2	-1.7628	6.97e-08	4.36e-06	DOWN	10687.8	15368.3	-0.52399	0.151	0.46506	FALSE	sp|Q39817|CALX_SOYBN	Calnexin homolog OS=Glycine max PE=2 SV=1	2
MD00G1076400	43.207	64.3017	66.8647	58.0135	12511.7	5227.92	1.259	0.022308	0.15897	FALSE	12323.5	5870.58	1.0698	0.0014517	0.01581	UP	10334.3	5438.99	0.92602	0.025703	0.14095	FALSE	sp|Q9FLT0|TSN2_ARATH	Ribonuclease TUDOR 2 OS=Arabidopsis thaliana GN=TSN2 PE=1 SV=1	TSN2
MD08G1049600	47.9236	93.0939	72.1014	32.1691	7275.54	2354.76	1.6275	0.0034245	0.04752	UP	5393.49	2643.83	1.0286	0.0079956	0.055449	FALSE	2284.86	2450.69	-0.10108	0.86702	1	FALSE	sp|Q940T9|COL4_ARATH	Zinc finger protein CONSTANS-LIKE 4 OS=Arabidopsis thaliana GN=COL4 PE=2 SV=2	COL4
MD00G1078300	5.79363	1.17896	2.28852	2.90111	202.464	698.297	-1.7862	0.0020958	0.034134	DOWN	406.369	784.206	-0.94844	0.0093079	0.061914	FALSE	504.467	726.769	-0.52674	0.24088	0.60359	FALSE	sp|Q652L2|HIRA_ORYSJ	Protein HIRA OS=Oryza sativa subsp. japonica GN=Os09g0567700 PE=2 SV=1	Os09g0567700
MD00G1078500	14.2061	3.05106	8.09551	8.05849	345.872	1029.11	-1.5731	0.0031056	0.044263	DOWN	869.72	1156.2	-0.41076	0.27021	0.57895	FALSE	837.726	1073.52	-0.3578	0.48673	0.84831	FALSE	sp|C0LGF4|FEI1_ARATH	LRR receptor-like serine/threonine-protein kinase FEI 1 OS=Arabidopsis thaliana GN=FEI1 PE=1 SV=1	FEI1
MD00G1078600	66.272	119.937	121.929	79.3806	7350.61	2613.67	1.4918	0.0060038	0.069058	FALSE	7293.93	2935.13	1.3133	0.001455	0.015837	UP	4581.86	2718.65	0.75304	0.096315	0.35127	FALSE	sp|Q01484|ANK2_HUMAN	Ankyrin-2 OS=Homo sapiens GN=ANK2 PE=1 SV=4	ANK2
MD00G1079100	2.88582	0.935144	0.781055	1.058	176.946	335.501	-0.92301	0.075161	0.3237	FALSE	134.67	376.85	-1.4846	0.00017505	0.0030363	DOWN	177.722	349.472	-0.97556	0.034217	0.17299	FALSE	sp|C0LGP4|Y3475_ARATH	Probable LRR receptor-like serine/threonine-protein kinase At3g47570 OS=Arabidopsis thaliana GN=At3g47570 PE=2 SV=1	At3g47570
MD00G1079900	7.44306	15.9177	11.9777	7.19478	637.621	186.603	1.7727	0.0021996	0.035391	UP	456.044	209.532	1.122	0.0028456	0.026155	UP	264.386	194.149	0.44549	0.34217	0.72201	FALSE	sp|Q0WMV8|PHF5B_ARATH	PHD finger-like domain-containing protein 5B OS=Arabidopsis thaliana GN=At1g07170 PE=2 SV=1	At1g07170
MD00G1080400	22.8353	40.1762	32.1042	23.4853	5386.34	1900.53	1.5029	0.0077046	0.080575	FALSE	4060.61	2133.79	0.92828	0.0061731	0.045993	UP	2863.21	1975.56	0.53537	0.20102	0.54674	FALSE	--	--	0
MD15G1045000	123.785	75.5734	58.9943	35.3457	5398.31	5670.22	-0.070898	0.80446	0.99435	FALSE	4031.26	6366.07	-0.65917	0.052144	0.20614	FALSE	2323.29	5895.59	-1.3435	0.0012878	0.013894	DOWN	sp|Q940T9|COL4_ARATH	Zinc finger protein CONSTANS-LIKE 4 OS=Arabidopsis thaliana GN=COL4 PE=2 SV=2	COL4
MD00G1080800	98.6364	158.074	217.954	440.951	18091.5	7034.91	1.3627	0.12781	0.42771	FALSE	24743.3	7899.52	1.6472	0.27439	0.58333	FALSE	47535.9	7318.61	2.6994	0.0016612	0.017019	UP	sp|O48651|ERG1_PANGI	Squalene monooxygenase OS=Panax ginseng PE=2 SV=1	2
MD00G1080900	2.47733	0.39201	0.667683	1.21352	44.7338	186.76	-2.0618	0.0007639	0.016893	DOWN	75.6262	209.739	-1.4716	0.00038189	0.0055854	DOWN	130.199	194.623	-0.57996	0.34512	0.72519	FALSE	sp|Q8W486|Y1491_ARATH	Uncharacterized protein At1g04910 OS=Arabidopsis thaliana GN=At1g04910 PE=2 SV=1	At1g04910
MD09G1079200	9.4831	47.3065	34.3509	19.2954	4038.17	486.765	3.0524	0.0030019	0.043419	UP	2653.75	546.514	2.2797	6.5e-11	9.92e-09	UP	1429.85	506.383	1.4976	0.0030357	0.027725	UP	sp|Q96502|COL2_ARATH	Zinc finger protein CONSTANS-LIKE 2 OS=Arabidopsis thaliana GN=COL2 PE=1 SV=1	COL2
MD00G1081900	0	0.0161733	0.0131182	0	0.568667	0	Inf	0.94415	1	FALSE	0.371577	0	Inf	0.96342	1	FALSE	0	0	NA	NA	NA	NA	sp|P27323|HS901_ARATH	Heat shock protein 90-1 OS=Arabidopsis thaliana GN=HSP90-1 PE=1 SV=3	HSP90-1
MD07G1144200	101.281	28.7741	39.5894	28.1922	1084.78	2669.42	-1.2991	0.020308	0.15055	FALSE	1486.94	2997.24	-1.0113	0.039241	0.17022	FALSE	1039.62	2775.52	-1.4167	0.0016075	0.016598	DOWN	sp|P35135|UBC4_SOLLC	Ubiquitin-conjugating enzyme E2-17 kDa OS=Solanum lycopersicum PE=2 SV=1	2
MD00G1083500	3.6414	1.6069	1.47288	0.824909	131.941	192.358	-0.5439	0.28455	0.63979	FALSE	113.675	216.047	-0.92643	0.029824	0.14187	FALSE	63.2211	200.207	-1.663	0.00085318	0.010015	DOWN	sp|Q9LMA1|FMO1_ARATH	Probable flavin-containing monooxygenase 1 OS=Arabidopsis thaliana GN=FMO1 PE=2 SV=1	FMO1
MD00G1083800	6.6338	0.67901	0.522692	2.03154	55.7267	346.191	-2.6351	9.99e-06	0.00070198	DOWN	39.2738	388.665	-3.3069	1.1e-13	2.89e-11	DOWN	149.226	360.06	-1.2707	0.010789	0.073977	FALSE	sp|O23006|LYM2_ARATH	LysM domain-containing GPI-anchored protein 2 OS=Arabidopsis thaliana GN=LYM2 PE=1 SV=1	LYM2
MD11G1299600	0.287055	0.25772	1.16645	1.17197	26.3525	21.0359	0.32509	0.59695	0.89091	FALSE	125.068	23.6087	2.4053	0.0066358	0.048432	UP	121.286	21.8094	2.4754	0.019774	0.11637	FALSE	sp|O82256|COL13_ARATH	Zinc finger protein CONSTANS-LIKE 13 OS=Arabidopsis thaliana GN=COL13 PE=2 SV=1	COL13
MD00G1084600	10.5895	0.962357	0.972111	0.93663	117.999	918.186	-2.96	6.4e-07	8.78e-05	DOWN	121.785	1031	-3.0816	1.77e-15	6.8e-13	DOWN	113.489	954.591	-3.0723	4.69e-11	4.95e-09	DOWN	sp|Q9FNX5|DRP1E_ARATH	Dynamin-related protein 1E OS=Arabidopsis thaliana GN=DRP1E PE=1 SV=1	DRP1E
MD00G1085200	5.37565	1.35272	1.30824	1.82951	100.111	254.105	-1.3438	0.01439	0.12117	FALSE	90.9346	285.298	-1.6496	6.58e-05	0.0013686	DOWN	121.758	264.273	-1.118	0.030098	0.15785	FALSE	--	--	0
MD00G1086500	10.8722	3.52384	3.55644	3.46852	404.718	788.685	-0.96253	0.055388	0.27181	FALSE	386.601	885.515	-1.1957	0.00096472	0.011508	DOWN	365.48	820.617	-1.1669	0.0057252	0.045583	DOWN	--	--	0
MD00G1087300	29.5538	38.1003	42.4553	32.8648	4198.24	2119.05	0.98636	0.055977	0.27347	FALSE	4595.77	2379.27	0.94979	0.0044304	0.036342	UP	3452.37	2204.38	0.64721	0.11738	0.39857	FALSE	sp|O80567|LRP6B_ARATH	La-related protein 6B OS=Arabidopsis thaliana GN=LARP6B PE=1 SV=2	LARP6B
MD00G1087700	21.4401	27.8894	40.5433	40.5079	3991.73	2094.69	0.93028	0.068464	0.30642	FALSE	5995.89	2352.56	1.3497	5.74e-05	0.0012235	UP	5826.41	2180.91	1.4177	0.00058587	0.0073694	UP	sp|Q6AWW5|Y5262_ARATH	Ankyrin repeat-containing protein At5g02620 OS=Arabidopsis thaliana GN=At5g02620 PE=1 SV=1	At5g02620
MD00G1087900	1.3507	1.44589	1.20058	15.2184	124.647	71.567	0.80049	0.53439	0.85186	FALSE	97.6048	80.4741	0.27843	0.88067	1	FALSE	1176.02	74.6231	3.9781	0.0010368	0.011693	UP	sp|P48979|PGLR_PRUPE	Polygalacturonase OS=Prunus persica PE=2 SV=1	2
MD00G1088600	10.9828	25.1636	15.9219	12.5267	2938.68	757.46	1.9559	0.10025	0.37581	FALSE	1674.28	850.543	0.97709	0.005197	0.040766	UP	1259.85	788.227	0.67657	0.096776	0.35239	FALSE	--	--	0
MD00G1089600	13.0552	2.3964	19.6716	19.7643	275.85	1131.42	-2.0362	0.00072942	0.016406	DOWN	2411.22	1270.78	0.92405	0.40204	0.7207	FALSE	2410.96	1176.88	1.0346	0.14971	0.46279	FALSE	sp|Q9FI00|MLO11_ARATH	MLO-like protein 11 OS=Arabidopsis thaliana GN=MLO11 PE=2 SV=1	MLO11
MD03G1105500	4.23786	0.413886	1.02734	1.22767	21.9064	165.284	-2.9155	0.00013655	0.0048349	DOWN	60.0355	185.632	-1.6286	0.006144	0.045827	DOWN	69.3041	171.745	-1.3093	0.041456	0.19908	FALSE	sp|O50055|COL1_ARATH	Zinc finger protein CONSTANS-LIKE 1 OS=Arabidopsis thaliana GN=COL1 PE=1 SV=1	COL1
MD00G1092900	0.366483	0.506915	1.30315	4.28334	37.9425	15.8619	1.2582	0.30591	0.66167	FALSE	84.0454	17.8239	2.2374	0.0051206	0.040365	UP	269.057	16.5609	4.0221	3.91e-06	0.00010646	UP	sp|Q7XT99|AKR2_ORYSJ	Probable aldo-keto reductase 2 OS=Oryza sativa subsp. japonica GN=Os04g0338000 PE=2 SV=2	Os04g0338000
MD08G1189500	1.64284	0.276946	0.121616	0.2293	10.61	49.8257	-2.2315	0.076407	0.32549	FALSE	5.78189	55.9125	-3.2736	0.0051878	0.040736	DOWN	10.4661	51.7806	-2.3067	0.025491	0.14007	FALSE	sp|Q41001|BCP_PEA	Blue copper protein OS=Pisum sativum PE=2 SV=1	2
MD00G1093400	3.00879	0.0727372	0.0551299	0.441327	9.77091	292.091	-4.9018	0.0017568	0.030595	DOWN	7.91951	328.096	-5.3726	0.00069222	0.008873	DOWN	59.0841	303.229	-2.3596	0.079653	0.30907	FALSE	sp|Q9FK76|SBT56_ARATH	Subtilisin-like protease SBT5.6 OS=Arabidopsis thaliana GN=SBT5.6 PE=2 SV=1	SBT5.6
MD00G1094100	22.3494	12.9637	21.9449	46.9188	2137.73	2400.61	-0.16732	0.97875	1	FALSE	3650.32	2696.16	0.43712	0.65605	0.91231	FALSE	7539.64	2496.18	1.5948	0.0023218	0.022278	UP	sp|Q9FFR9|CHX18_ARATH	Cation/H(+) antiporter 18 OS=Arabidopsis thaliana GN=CHX18 PE=2 SV=1	CHX18
MD00G1096000	43.4172	7.16951	8.94716	11.2288	293.45	1224.78	-2.0613	0.00042786	0.011174	DOWN	381.702	1375.04	-1.849	0.00016632	0.0029134	DOWN	463.337	1271.73	-1.4567	0.0020411	0.020126	DOWN	sp|Q6R567|RMA1_CAPAN	E3 ubiquitin-protein ligase RMA1H1 OS=Capsicum annuum GN=RMA1H1 PE=1 SV=1	RMA1H1
MD00G1098400	24.6371	35.5878	44.7309	37.0456	2229.65	1040.41	1.0997	0.022443	0.15929	FALSE	2835.47	1168.51	1.2789	0.00013275	0.0024375	UP	2291.09	1083.33	1.0806	0.0081898	0.060133	FALSE	sp|Q9LVM5|TTHL_ARATH	Uric acid degradation bifunctional protein TTL OS=Arabidopsis thaliana GN=TTL PE=1 SV=1	TTL
MD00G1098500	20.409	49.8834	79.2875	60.5085	3670.41	1036.53	1.8242	0.01149	0.10505	FALSE	6009.51	1164.1	2.368	5.99e-12	1.13e-09	UP	4510.42	1079.01	2.0636	6.6e-07	2.26e-05	UP	sp|Q9LKJ1|HIBC1_ARATH	3-hydroxyisobutyryl-CoA hydrolase 1 OS=Arabidopsis thaliana GN=CHY1 PE=1 SV=1	CHY1
MD00G1101700	5.3873	14.9897	8.14072	13.3662	2180.3	453.655	2.2649	0.14739	0.46032	FALSE	1008.16	509.528	0.9845	0.010924	0.069508	FALSE	1683.87	472.811	1.8324	0.001959	0.019413	UP	sp|O65468|CRK8_ARATH	Cysteine-rich receptor-like protein kinase 8 OS=Arabidopsis thaliana GN=CRK8 PE=3 SV=2	CRK8
MD00G1101900	16.9128	1.71405	2.29609	2.70666	182.186	1324	-2.8614	1.25e-05	0.00082471	DOWN	264.437	1487.09	-2.4915	1.72e-05	0.00045474	DOWN	309.643	1376.57	-2.1524	7.53e-05	0.0013404	DOWN	sp|Q9M0X5|CRK25_ARATH	Cysteine-rich receptor-like protein kinase 25 OS=Arabidopsis thaliana GN=CRK25 PE=3 SV=1	CRK25
MD00G1102100	15.2115	0.985638	1.36067	1.3137	110.899	1208.47	-3.4459	1.99e-08	6.04e-06	DOWN	156.151	1357.32	-3.1198	9.79e-08	5.84e-06	DOWN	149.955	1256.54	-3.0669	9.47e-08	4.08e-06	DOWN	sp|Q8GYA4|CRK10_ARATH	Cysteine-rich receptor-like protein kinase 10 OS=Arabidopsis thaliana GN=CRK10 PE=1 SV=3	CRK10
MD00G1102300	0.948633	3.16085	6.43457	6.09761	111.79	19.3758	2.5285	0.14022	0.44864	FALSE	194.854	21.7839	3.1611	0.0011553	0.013274	UP	179.438	20.3113	3.1431	8.33e-08	3.63e-06	UP	--	--	0
MD00G1103100	0.0117335	0.98614	1.11977	0.0168432	51.6744	0.479185	6.7527	0.11312	0.40175	FALSE	70.3504	0.537826	7.0313	0.0031194	0.028051	UP	1.14454	0.4957	1.2072	1	1	FALSE	sp|Q9XF89|CB5_ARATH	Chlorophyll a-b binding protein CP26, chloroplastic OS=Arabidopsis thaliana GN=LHCB5 PE=1 SV=1	LHCB5
MD00G1105200	14.4652	5.06819	7.07331	1.20518	70.1896	151.582	-1.1108	0.23426	0.58083	FALSE	109.384	170.216	-0.63797	0.193	0.47526	FALSE	17.9892	157.469	-3.1299	3.57e-07	1.33e-05	DOWN	sp|P17407|21KD_DAUCA	21 kDa protein OS=Daucus carota PE=2 SV=1	2
MD00G1105300	310.616	41.881	42.3701	2.00317	1174.37	6425.46	-2.4519	2.46e-05	0.0013714	DOWN	1318.21	7215.73	-2.4526	3.66e-10	4.45e-08	DOWN	57.657	6689.28	-6.8582	4.53e-40	3.1e-36	DOWN	sp|P17407|21KD_DAUCA	21 kDa protein OS=Daucus carota PE=2 SV=1	2
MD00G1105400	44.5397	69.4362	124.808	120.851	11135.2	4846.31	1.2002	0.013933	0.11899	FALSE	20695.1	5443.66	1.9266	1.83e-08	1.38e-06	UP	19370.9	5050.99	1.9393	2.52e-06	7.32e-05	UP	sp|C0LGP4|Y3475_ARATH	Probable LRR receptor-like serine/threonine-protein kinase At3g47570 OS=Arabidopsis thaliana GN=At3g47570 PE=2 SV=1	At3g47570
MD00G1106800	0.0493	0.780357	0.487247	3.20141	66.497	2.43555	4.771	0.0035872	0.049257	UP	39.2418	2.73772	3.8413	0.16525	0.43301	FALSE	252.972	2.53284	6.6421	0.021005	0.12166	FALSE	--	--	0
MD00G1107100	1.34571	0.15251	0.309908	0.414839	18.2303	109.452	-2.5859	0.0002643	0.0078568	DOWN	37.1669	122.938	-1.7258	0.00049075	0.0067604	DOWN	48.8077	114.027	-1.2242	0.026124	0.14246	FALSE	sp|Q0J952|C3H32_ORYSJ	Zinc finger CCCH domain-containing protein 32 OS=Oryza sativa subsp. japonica GN=Os04g0671800 PE=2 SV=1	Os04g0671800
MD11G1183800	19.3502	5.00425	7.55284	5.48019	322.491	824.936	-1.355	0.018541	0.14193	FALSE	483.424	926.285	-0.93817	0.031348	0.14672	FALSE	335.572	858.88	-1.3558	0.0018967	0.018928	DOWN	sp|Q41001|BCP_PEA	Blue copper protein OS=Pisum sativum PE=2 SV=1	2
MD01G1187600	24.2257	8.14288	10.2785	6.59564	599.985	1207.22	-1.0087	0.075666	0.32436	FALSE	767.431	1355.5	-0.82071	0.019932	0.1068	FALSE	477.472	1255.54	-1.3948	0.00082411	0.0097208	DOWN	sp|F4K6F1|GT18_ARATH	Xyloglucan galactosyltransferase XLT2 OS=Arabidopsis thaliana GN=XLT2 PE=1 SV=1	XLT2
MD00G1108900	8.05791	2.09877	2.17739	1.68263	57.6051	154.557	-1.4239	0.028024	0.18305	FALSE	60.439	173.507	-1.5214	0.0013463	0.014908	DOWN	45.0324	160.722	-1.8355	0.0011397	0.012597	DOWN	sp|Q39266|ZFP7_ARATH	Zinc finger protein 7 OS=Arabidopsis thaliana GN=ZFP7 PE=2 SV=1	ZFP7
MD00G1109700	36.8755	21.9729	15.0735	8.51847	874.917	908.679	-0.054625	0.78712	0.98599	FALSE	554.142	1020.05	-0.88031	0.02282	0.11749	FALSE	311.521	944.07	-1.5996	0.00022604	0.0033862	DOWN	sp|Q9SUI5|PSAK_ARATH	Photosystem I reaction center subunit psaK, chloroplastic OS=Arabidopsis thaliana GN=PSAK PE=2 SV=2	PSAK
MD00G1110000	359.009	200.795	245.312	86.375	2230.11	2718.39	-0.28564	0.68925	0.9465	FALSE	2797.44	3052.49	-0.12588	0.72449	0.9526	FALSE	924.839	2827.29	-1.6121	0.00021216	0.0032064	DOWN	--	--	0
MD00G1111700	5.02048	0.908135	1.28761	2.49006	84.482	293.51	-1.7967	0.001553	0.027907	DOWN	111.779	329.604	-1.5601	7.64e-05	0.0015462	DOWN	209.978	305.559	-0.54121	0.25707	0.62456	FALSE	sp|Q3EDL4|Y1154_ARATH	Probable serine/threonine-protein kinase At1g01540 OS=Arabidopsis thaliana GN=At1g01540 PE=1 SV=2	At1g01540
MD00G1112000	0	0.0114982	0.0093262	0	0.568667	0	Inf	0.94415	1	FALSE	0.371577	0	Inf	0.96342	1	FALSE	0	0	NA	NA	NA	NA	sp|A7PZL3|PGLR_VITVI	Probable polygalacturonase OS=Vitis vinifera GN=GSVIVT00026920001 PE=1 SV=1	GSVIVT00026920001
MD00G1112500	340.942	988.974	1158.28	1746.09	84042.2	18794.1	2.1608	0.00019475	0.0063074	UP	97475	21109.8	2.2071	1.72e-10	2.34e-08	UP	145221	19591.5	2.8899	0.00045517	0.0059835	UP	sp|Q9SZE7|PER51_ARATH	Peroxidase 51 OS=Arabidopsis thaliana GN=PER51 PE=2 SV=1	PER51
MD00G1112600	1.11693	1.87573	2.19834	3.55573	36.1598	12.4927	1.5333	0.23882	0.58595	FALSE	36.5297	14.0335	1.3802	0.049052	0.19753	FALSE	57.3592	13.003	2.1412	0.0013785	0.014646	UP	--	--	0
MD00G1112800	0	0.0198598	0.00776846	0	0.976744	0	Inf	0.74303	0.96802	FALSE	0.371577	0	Inf	0.96342	1	FALSE	0	0	NA	NA	NA	NA	--	--	0
MD00G1113900	30.0328	48.5235	49.3319	32.0366	2430.75	967.098	1.3297	0.012564	0.11125	FALSE	2399.88	1086	1.1439	0.00063802	0.008309	UP	1500.04	1006.51	0.57564	0.16562	0.49078	FALSE	sp|Q9S7A0|DHE3_ARATH	Probable glutamate dehydrogenase 3 OS=Arabidopsis thaliana GN=GSH3 PE=3 SV=1	GSH3
MD00G1115400	107.704	48.3803	47.257	14.4266	2837.36	3925.85	-0.46845	0.30887	0.66463	FALSE	2482.69	4407.2	-0.82796	0.18835	0.46868	FALSE	740.999	4085.88	-2.4631	0.00047058	0.0061508	DOWN	--	--	0
MD00G1116400	15.2914	0.765853	1.34732	1.19786	41.0133	560.179	-3.7717	1.12e-09	6.51e-07	DOWN	69.2951	629.255	-3.1828	8.48e-15	2.68e-12	DOWN	62.2948	583.478	-3.2275	2.11e-11	2.41e-09	DOWN	sp|Q50EX6|ODO1_PETHY	Protein ODORANT1 OS=Petunia hybrida GN=ODO1 PE=2 SV=1	ODO1
MD11G1284300	4.33803	1.38119	0.491019	0.0236007	166.915	402.771	-1.2708	0.22532	0.56973	FALSE	66.2731	452.023	-2.7699	0.00046624	0.0065086	DOWN	3.39811	417.993	-6.9426	2.11e-11	2.41e-09	DOWN	sp|O04408|KSA_PEA	Ent-copalyl diphosphate synthase, chloroplastic OS=Pisum sativum PE=2 SV=1	2
MD00G1118800	25.8677	17.4162	16.6448	2.22878	1196.55	1274.26	-0.090783	0.90912	1	FALSE	1188.08	1430.56	-0.26795	0.6496	0.90848	FALSE	156.693	1324	-3.0789	7.59e-12	9.72e-10	DOWN	sp|Q9LI65|WTR24_ARATH	WAT1-related protein At3g30340 OS=Arabidopsis thaliana GN=At3g30340 PE=2 SV=1	At3g30340
MD12G1215400	3.40155	3.21583	4.18854	7.12442	142.627	94.8853	0.58799	0.3617	0.7159	FALSE	178.604	106.602	0.74453	0.096648	0.3086	FALSE	283.921	98.8561	1.5221	0.00044976	0.0059315	UP	sp|P25469|H2A1_SOLLC	Histone H2A.1 OS=Solanum lycopersicum PE=2 SV=1	2
MD00G1123300	0.187354	2.59074	2.60826	1.76889	83.9397	3.90811	4.4248	1.3e-07	2.65e-05	UP	82.3358	4.39153	4.2287	4.75e-10	5.63e-08	UP	53.795	4.066	3.7258	2.83e-06	8.11e-05	UP	sp|Q9ZVJ5|SGGP_ARATH	Haloacid dehalogenase-like hydrolase domain-containing protein Sgpp OS=Arabidopsis thaliana GN=SGPP PE=1 SV=2	SGPP
MD00G1123600	3.3169	5.31722	4.31317	9.72454	316.63	127.117	1.3166	0.057552	0.27748	FALSE	256.906	142.777	0.84747	0.19296	0.47522	FALSE	538.713	132.541	2.0231	0.00029558	0.0042145	UP	sp|Q9ZVJ5|SGGP_ARATH	Haloacid dehalogenase-like hydrolase domain-containing protein Sgpp OS=Arabidopsis thaliana GN=SGPP PE=1 SV=2	SGPP
MD00G1124700	0.909387	0.367472	0.526172	0.200534	52.9146	92.9116	-0.81219	0.2634	0.61582	FALSE	81.2647	104.359	-0.36086	0.43055	0.74536	FALSE	29.1852	96.7171	-1.7285	0.0043528	0.036734	DOWN	sp|Q8VZG8|MIK2_ARATH	MDIS1-interacting receptor like kinase 2 OS=Arabidopsis thaliana GN=MIK2 PE=1 SV=3	MIK2
MD00G1126000	4.95315	7.32164	9.80927	4.76215	241.619	111.457	1.1162	0.037266	0.21768	FALSE	334.608	125.185	1.4184	0.002868	0.026295	UP	153.841	116.059	0.40658	0.32296	0.70258	FALSE	sp|Q40392|TMVRN_NICGU	TMV resistance protein N OS=Nicotiana glutinosa GN=N PE=1 SV=1	N
MD10G1175500	10.6657	1.6819	3.31558	3.29566	204.384	917.201	-2.166	0.00012473	0.0045029	DOWN	408.987	1029.99	-1.3325	0.0031134	0.028003	DOWN	403.945	955.434	-1.242	0.0053059	0.042809	DOWN	sp|Q7XJ98|MUR3_ARATH	Xyloglucan galactosyltransferase MUR3 OS=Arabidopsis thaliana GN=MUR3 PE=1 SV=1	MUR3
MD00G1127200	13.3703	3.4947	4.65721	3.34649	257.948	746.509	-1.5331	0.027429	0.18068	FALSE	389.199	838.494	-1.1073	0.0018686	0.01908	DOWN	266.553	778.153	-1.5456	0.00056677	0.0071775	DOWN	sp|Q9LHE3|ASPG2_ARATH	Protein ASPARTIC PROTEASE IN GUARD CELL 2 OS=Arabidopsis thaliana GN=ASPG2 PE=2 SV=1	ASPG2
MD00G1127400	0.430174	0.936169	0.763674	0.280447	171.923	52.9227	1.6998	0.0034667	0.047893	UP	141.817	59.4332	1.2547	0.33071	0.64851	FALSE	48.947	55.1373	-0.17181	0.92471	1	FALSE	sp|Q9FL28|FLS2_ARATH	LRR receptor-like serine/threonine-protein kinase FLS2 OS=Arabidopsis thaliana GN=FLS2 PE=1 SV=1	FLS2
MD00G1127500	21.0953	31.8156	31.1256	19.8361	2868.55	1229.46	1.2223	0.020494	0.15149	FALSE	2748.93	1380.55	0.99362	0.0032188	0.02871	UP	1690.42	1278.98	0.40239	0.33279	0.71248	FALSE	sp|Q9FN03|UVR8_ARATH	Ultraviolet-B receptor UVR8 OS=Arabidopsis thaliana GN=UVR8 PE=1 SV=1	UVR8
MD00G1127700	33.0809	45.1165	52.3372	27.2159	1416.84	686.486	1.0454	0.052783	0.26509	FALSE	1616.47	770.909	1.0682	0.0014774	0.016025	UP	807.081	713.261	0.17828	0.54047	0.88383	FALSE	sp|P46521|LEA5A_GOSHI	Late embryogenesis abundant protein Lea5-A OS=Gossypium hirsutum GN=LEA5-A PE=2 SV=1	LEA5-A
MD00G1129500	0.25978	9.22557	12.1665	31.1282	828.675	14.5599	5.8307	0.095654	0.36639	FALSE	1134.12	16.3711	6.1143	0.12373	0.36085	FALSE	2658.77	15.1935	7.4512	3.12e-08	1.54e-06	UP	--	--	0
MD00G1129800	8.09595	2.46807	4.19722	1.95461	143.615	328.95	-1.1957	0.053326	0.26637	FALSE	255.481	369.508	-0.53239	0.16634	0.43475	FALSE	111.538	342.868	-1.6201	0.0010896	0.012162	DOWN	sp|Q9FWS1|AUL1_ARATH	Auxilin-like protein 1 OS=Arabidopsis thaliana GN=AUL1 PE=2 SV=2	AUL1
MD14G1242700	47.027	4.81652	1.19193	0.437177	358.845	2026.79	-2.4978	8.96e-06	0.00064755	DOWN	72.9998	2275.4	-4.9621	8.7e-14	2.32e-11	DOWN	26.0291	2108.89	-6.3402	7.54e-18	3.04e-15	DOWN	sp|P54767|DCE_SOLLC	Glutamate decarboxylase OS=Solanum lycopersicum PE=2 SV=1	2
MD00G1130500	17.1766	22.1209	27.2988	31.5466	1762.68	882.229	0.99854	0.051927	0.26326	FALSE	2125.81	990.751	1.1014	0.0014046	0.015433	UP	2358.74	917.967	1.3615	0.00075103	0.009036	UP	sp|Q9SQT8|DHQSD_ARATH	Bifunctional 3-dehydroquinate dehydratase/shikimate dehydrogenase, chloroplastic OS=Arabidopsis thaliana GN=EMB3004 PE=1 SV=1	EMB3004
MD15G1438500	0.132414	1.09444	4.61001	12.602	102.476	7.81622	3.7127	0.16485	0.48769	FALSE	446.959	8.78307	5.6693	0.09906	0.31296	FALSE	1114.37	8.13199	7.0984	2.91e-17	1.03e-14	UP	sp|Q7XJ98|MUR3_ARATH	Xyloglucan galactosyltransferase MUR3 OS=Arabidopsis thaliana GN=MUR3 PE=1 SV=1	MUR3
MD00G1131300	2.88428	2.07257	3.61862	7.2247	79.8669	68.5022	0.22145	0.7973	0.99195	FALSE	131.469	76.9355	0.773	0.21929	0.51222	FALSE	255.023	71.3916	1.8368	0.0010905	0.012165	UP	sp|P0C8Q9|Y5902_ARATH	Uncharacterized protein At5g19025 OS=Arabidopsis thaliana GN=At5g19025 PE=2 SV=3	At5g19025
MD00G1132600	12.2709	15.4067	21.3799	15.4348	1194.25	641.654	0.89623	0.070306	0.31113	FALSE	1687.65	720.592	1.2278	0.00034216	0.0051258	UP	1187.81	667.87	0.83066	0.051406	0.23009	FALSE	sp|O81445|CNBL1_ARATH	Calcineurin B-like protein 1 OS=Arabidopsis thaliana GN=CBL1 PE=1 SV=3	CBL1
MD13G1134600	81.1645	23.6305	15.9871	1.32711	1531.12	3952.82	-1.3683	0.11052	0.39702	FALSE	1167.91	4436.61	-1.9255	0.0089839	0.060221	FALSE	91.0201	4104.98	-5.495	9.46e-12	1.18e-09	DOWN	sp|Q41638|XTHA_PHAAN	Xyloglucan endotransglucosylase/hydrolase protein A OS=Phaseolus angularis GN=XTHA PE=1 SV=1	XTHA
MD00G1137100	0.00605736	0.135456	0.201585	0.950254	8.62298	0.257096	5.0678	0.025502	0.1722	FALSE	13.8272	0.289081	5.5799	0.090868	0.29636	FALSE	57.9805	0.27088	7.7418	5.64e-12	7.45e-10	UP	sp|Q9FLN0|GLIP1_ARATH	GDSL esterase/lipase 1 OS=Arabidopsis thaliana GN=GLIP1 PE=1 SV=1	GLIP1
MD00G1137500	12.9257	31.0729	22.1463	12.9657	5630.56	1425.07	1.9822	0.012488	0.11087	FALSE	3713	1600.42	1.2141	0.00033843	0.0050886	UP	2072.42	1483.02	0.48278	0.24508	0.60879	FALSE	sp|Q9FY06|PPF1_PEA	Inner membrane protein PPF-1, chloroplastic OS=Pisum sativum GN=PPF-1 PE=2 SV=2	PPF-1
MD00G1137800	78.0123	154.458	201.944	208.388	8813.93	2799.55	1.6546	0.0029163	0.042584	UP	10896.6	3143.4	1.7935	1.16e-07	6.71e-06	UP	11033.9	2912.83	1.9215	4.08e-06	0.00011051	UP	sp|Q42540|UBC7_ARATH	Ubiquitin-conjugating enzyme E2 7 OS=Arabidopsis thaliana GN=UBC7 PE=1 SV=1	UBC7
MD00G1138700	0.0517272	0.0490045	0.164332	0.245413	6.47062	3.75774	0.78404	0.85429	1	FALSE	17.3717	4.22333	2.0403	0.04652	0.19034	FALSE	26.9718	3.93396	2.7774	0.0061941	0.048508	UP	sp|A6YIH8|C7D55_HYOMU	Premnaspirodiene oxygenase OS=Hyoscyamus muticus GN=CYP71D55 PE=1 SV=1	CYP71D55
MD00G1140200	30.7158	4.80418	11.8475	23.1554	556.605	2466	-2.1474	0.00018558	0.0060892	DOWN	1415.94	2770.02	-0.96813	0.0033859	0.029865	DOWN	2662.45	2568.02	0.052095	0.81399	1	FALSE	sp|P93033|FUM1_ARATH	Fumarate hydratase 1, mitochondrial OS=Arabidopsis thaliana GN=FUM1 PE=1 SV=2	FUM1
MD00G1140500	2.49207	0.632241	0.760087	0.608699	117.699	319.274	-1.4397	0.011519	0.10514	FALSE	141.286	358.507	-1.3434	0.0068486	0.049576	DOWN	111.947	332.606	-1.571	0.0022282	0.021527	DOWN	sp|F4IL57|KN14I_ARATH	Kinesin-like protein KIN-14I OS=Arabidopsis thaliana GN=KIN14I PE=2 SV=1	KIN14I
MD00G1141600	0	0.0332597	0.286069	0.910048	0.944538	0	Inf	0.7464	0.96846	FALSE	7.58568	0	Inf	0.15718	0.41886	FALSE	22.5923	0	Inf	0.00037127	0.0050738	UP	--	--	0
MD00G1141700	2.46279	17.5266	36.934	110.422	1494.74	133.173	3.4885	0.17369	0.50044	FALSE	3100.68	149.677	4.3727	0.0052139	0.040879	UP	8945.41	139.272	6.0052	1.64e-11	1.94e-09	UP	sp|Q84TF0|AKRCA_ARATH	Aldo-keto reductase family 4 member C10 OS=Arabidopsis thaliana GN=AKR4C10 PE=1 SV=1	AKR4C10
MD17G1031400	5.24561	0.29995	1.40865	5.30874	12.3562	130.64	-3.4023	1.95e-05	0.0011387	DOWN	51.2118	146.805	-1.5194	0.027819	0.135	FALSE	196.026	136.284	0.52443	0.4466	0.81887	FALSE	sp|Q9ZR41|GLRX_SOLLC	Glutaredoxin OS=Solanum lycopersicum PE=3 SV=1	3
MD00G1143400	43.7333	157.9	87.3574	78.7754	15589.6	2666.31	2.5477	5.34e-05	0.0024296	UP	8178.39	2993.5	1.45	0.00077138	0.0096599	UP	7195.81	2772.37	1.376	0.074094	0.29435	FALSE	sp|Q9LEU7|CIPK5_ARATH	CBL-interacting serine/threonine-protein kinase 5 OS=Arabidopsis thaliana GN=CIPK5 PE=2 SV=1	CIPK5
MD00G1144400	1.97255	0.176679	0.417176	0.779164	15.8819	129.173	-3.0239	3.1e-05	0.0016172	DOWN	39.4718	145.13	-1.8785	0.0020886	0.020715	DOWN	70.9972	134.552	-0.92233	0.29689	0.67378	FALSE	--	--	0
MD00G1145000	11.4303	2.99918	4.3714	7.17208	226.21	554.137	-1.2926	0.018926	0.14388	FALSE	316.224	622.444	-0.977	0.0062736	0.046496	DOWN	509.628	577.131	-0.17945	0.64697	0.93822	FALSE	sp|Q9LT17|BBR_ARATH	E3 ubiquitin ligase BIG BROTHER-related OS=Arabidopsis thaliana GN=BBR PE=2 SV=1	BBR
MD00G1145200	0.00413028	0.483158	4.50029	9.73732	46.2904	0.242753	7.5751	0.037387	0.21817	FALSE	445.036	0.272973	10.671	0.040316	0.17339	FALSE	884.372	0.252322	11.775	6.16e-09	3.75e-07	UP	sp|B8AVF0|BGL12_ORYSI	Beta-glucosidase 12 OS=Oryza sativa subsp. indica GN=BGLU12 PE=3 SV=1	BGLU12
MD00G1145300	0.00458396	2.58073	10.7267	28.4275	221.451	0.242753	9.8333	0.016375	0.1308	FALSE	949.866	0.272973	11.765	0.020468	0.10866	FALSE	2324.48	0.252322	13.169	6.71e-11	6.88e-09	UP	sp|B8AVF0|BGL12_ORYSI	Beta-glucosidase 12 OS=Oryza sativa subsp. indica GN=BGLU12 PE=3 SV=1	BGLU12
MD00G1145500	4.68406	3.84277	1.49873	0	247.899	217.124	0.19123	0.73823	0.96636	FALSE	116.552	243.664	-1.0639	0.33915	0.65728	FALSE	0	224.536	#NAME?	6.08e-05	0.0011207	DOWN	--	--	0
MD00G1145600	74.8535	111.116	104.209	66.2262	4763.9	2072.08	1.2011	0.028131	0.18354	FALSE	4323.79	2327.2	0.8937	0.0056054	0.042909	UP	2684.82	2155.9	0.31653	0.44797	0.81993	FALSE	sp|Q9FUL4|RL24_PRUAV	60S ribosomal protein L24 OS=Prunus avium GN=RPL24 PE=2 SV=1	RPL24
MD00G1146800	15.5416	20.8869	25.8951	20.6561	2696.41	1298.93	1.0537	0.047566	0.2513	FALSE	3237.03	1458.61	1.1501	0.00056465	0.0075139	UP	2506.53	1351.46	0.89118	0.023926	0.13361	FALSE	sp|Q9MA15|Y1796_ARATH	Uncharacterized aarF domain-containing protein kinase At1g79600, chloroplastic OS=Arabidopsis thaliana GN=At1g79600 PE=2 SV=1	At1g79600
MD00G1146900	0.0695931	0.352762	0.671902	0.493364	54.0902	7.749	2.8033	0.039755	0.22635	FALSE	111.34	8.70312	3.6773	1.76e-10	2.38e-08	UP	78.1744	8.1037	3.27	6.26e-07	2.17e-05	UP	sp|Q851L8|CESA5_ORYSJ	Probable cellulose synthase A catalytic subunit 5 [UDP-forming] OS=Oryza sativa subsp. japonica GN=CESA5 PE=2 SV=1	CESA5
MD00G1148200	43.7833	468.779	211.583	170.619	31303	1803.64	4.1173	7.32e-08	1.69e-05	UP	13429.9	2025.98	2.7288	0.0043602	0.035898	UP	10691.9	1885.68	2.5034	0.056207	0.24495	FALSE	sp|Q39219|AOX1A_ARATH	Ubiquinol oxidase 1a, mitochondrial OS=Arabidopsis thaliana GN=AOX1A PE=1 SV=2	AOX1A
MD00G1149300	32.2438	35.8775	49.2092	28.7064	4039.56	2485.01	0.70095	0.12426	0.42143	FALSE	5710.8	2790.53	1.0332	0.0017925	0.01855	UP	3238.08	2584.98	0.32498	0.43679	0.8114	FALSE	--	--	0
MD00G1152300	1.66802	0.338007	0.378601	0.287369	38.3038	121.247	-1.6624	0.0092705	0.09146	FALSE	41.794	136.162	-1.704	0.0048548	0.038796	DOWN	29.2428	125.921	-2.1064	0.0045086	0.037785	DOWN	sp|Q9LRR4|R13L1_ARATH	Putative disease resistance RPP13-like protein 1 OS=Arabidopsis thaliana GN=RPPL1 PE=3 SV=1	RPPL1
MD00G1155100	2.17331	0.0552359	0.163484	0.352251	1.95349	48.7251	-4.6405	0.0023886	0.037355	DOWN	5.06782	54.7447	-3.4333	0.013932	0.083147	FALSE	11.0106	50.6558	-2.2018	0.096663	0.35217	FALSE	sp|C0LGP4|Y3475_ARATH	Probable LRR receptor-like serine/threonine-protein kinase At3g47570 OS=Arabidopsis thaliana GN=At3g47570 PE=2 SV=1	At3g47570
MD00G1156300	8.63871	22.542	14.2402	13.2015	2427.52	559.455	2.1174	0.024166	0.16664	FALSE	1412.84	628.305	1.1691	0.0035677	0.030988	UP	1284.16	582.564	1.1403	0.10511	0.37155	FALSE	sp|Q9LIB3|BAG8_ARATH	BAG family molecular chaperone regulator 8, chloroplastic OS=Arabidopsis thaliana GN=BAG1 PE=1 SV=1	BAG1
MD00G1158500	0.506952	0.0568787	0.0697026	0.0389207	9.16656	51.9822	-2.5036	0.001854	0.031695	DOWN	10.4357	58.3811	-2.484	0.00024616	0.0039616	DOWN	5.75926	54.1096	-3.2319	5.62e-05	0.0010447	DOWN	sp|Q40392|TMVRN_NICGU	TMV resistance protein N OS=Nicotiana glutinosa GN=N PE=1 SV=1	N
MD17G1089900	64.9895	10.1801	10.6643	2.24579	891.054	4257.35	-2.2564	0.00035578	0.009831	DOWN	1036.72	4779.92	-2.205	0.0002454	0.0039553	DOWN	201.752	4431.69	-4.4572	3.25e-12	4.54e-10	DOWN	sp|Q8LDW9|XTH9_ARATH	Xyloglucan endotransglucosylase/hydrolase protein 9 OS=Arabidopsis thaliana GN=XTH9 PE=2 SV=2	XTH9
MD04G1020100	868.624	39.4979	39.4692	33.5198	1947.73	32415.3	-4.0568	0.00076792	0.016954	DOWN	2124.73	36371.3	-4.0974	0.00050654	0.0069242	DOWN	1726.63	33631	-4.2838	0.00041944	0.0056126	DOWN	sp|P35694|XTH2_SOYBN	Xyloglucan endotransglucosylase/hydrolase 2 OS=Glycine max PE=2 SV=1	2
MD00G1161200	0	0.0545288	0.0576658	0	0.751741	0	Inf	0.76843	0.97748	FALSE	0.721949	0	Inf	0.79849	0.98285	FALSE	0	0	NA	NA	NA	NA	--	--	0
MD00G1161400	4.88266	1.22628	0.140485	0.551106	108.811	274.195	-1.3334	0.26306	0.61541	FALSE	12.0351	307.764	-4.6765	9.85e-06	0.00028532	DOWN	44.1929	285.232	-2.6903	0.0040697	0.034882	DOWN	sp|Q9XF89|CB5_ARATH	Chlorophyll a-b binding protein CP26, chloroplastic OS=Arabidopsis thaliana GN=LHCB5 PE=1 SV=1	LHCB5
MD00G1162100	0.0242483	0.266656	0.474991	0.884954	9.1564	0.499849	4.1952	0.03785	0.21967	FALSE	16.0135	0.562054	4.8324	0.18368	0.4615	FALSE	26.8211	0.523202	5.6799	0.00016098	0.0025412	UP	sp|B9EXZ6|BAT1_ORYSJ	Amino-acid permease BAT1 homolog OS=Oryza sativa subsp. japonica GN=BAT1 PE=2 SV=1	BAT1
MD00G1162300	0.0460942	0.153117	0.739434	2.12397	8.0958	1.4852	2.4465	0.23369	0.58001	FALSE	38.9795	1.67005	4.5447	0.17408	0.44679	FALSE	102.227	1.55105	6.0424	7.89e-09	4.56e-07	UP	sp|Q9ZU50|BAT1_ARATH	Amino-acid permease BAT1 OS=Arabidopsis thaliana GN=BAT1 PE=2 SV=2	BAT1
MD16G1244300	13.2655	20.246	19.5191	25.4914	1479.98	616.758	1.2628	0.020159	0.14973	FALSE	1422.82	692.85	1.0381	0.27731	0.58712	FALSE	1755.06	643.016	1.4486	0.00063811	0.0078985	UP	sp|Q0JEE2|WRK51_ORYSJ	WRKY transcription factor WRKY51 OS=Oryza sativa subsp. japonica GN=WRKY51 PE=1 SV=1	WRKY51
MD00G1166100	0.0787105	0.530171	0.623916	0.226245	22.0786	1.98043	3.4788	0.0088987	0.088911	FALSE	23.9878	2.22385	3.4312	0.001193	0.013613	UP	8.51402	2.06598	2.043	0.22472	0.58228	FALSE	--	--	0
MD00G1166500	0.110998	0.270175	0.733738	2.15484	29.4534	7.54819	1.9642	0.26889	0.62303	FALSE	81.8225	8.47761	3.2708	0.26738	0.57584	FALSE	217.552	7.84389	4.7936	6.16e-16	1.77e-13	UP	sp|Q9LY50|ACCR3_ARATH	Putative serine/threonine-protein kinase-like protein CCR3 OS=Arabidopsis thaliana GN=CCR3 PE=2 SV=1	CCR3
MD00G1166600	0.209552	0.371182	1.04515	3.50776	4.54265	1.66767	1.4457	0.48377	0.81474	FALSE	13.4344	1.87021	2.8447	0.30579	0.62134	FALSE	41.1875	1.72154	4.5804	2.58e-06	7.46e-05	UP	sp|Q9LY50|ACCR3_ARATH	Putative serine/threonine-protein kinase-like protein CCR3 OS=Arabidopsis thaliana GN=CCR3 PE=2 SV=1	CCR3
MD17G1003300	21.0518	35.5983	39.4864	32.1812	5984.96	2335.99	1.3573	0.0072554	0.077983	FALSE	6691.74	2623.35	1.351	7.64e-05	0.0015462	UP	5227.77	2432.06	1.104	0.0064205	0.049872	UP	sp|B9DGD6|ACS_ARATH	Acetyl-coenzyme A synthetase, chloroplastic/glyoxysomal OS=Arabidopsis thaliana GN=ACS PE=1 SV=1	ACS
MD00G1171800	22.9068	126.034	74.9842	66.3	25445.4	2743.56	3.2133	0.0084436	0.085979	FALSE	13856.8	3082.14	2.1686	5.78e-05	0.0012293	UP	11946.6	2859.47	2.0628	0.00507	0.041262	UP	sp|O80738|TPS10_ARATH	Probable alpha,alpha-trehalose-phosphate synthase [UDP-forming] 10 OS=Arabidopsis thaliana GN=TPS10 PE=2 SV=1	TPS10
MD00G1172000	35.8937	10.7703	11.482	10.0307	613.665	1341.47	-1.1283	0.031517	0.19652	FALSE	633.083	1506.57	-1.2508	0.00038394	0.0056115	DOWN	546.966	1396.28	-1.3521	0.0010418	0.01173	DOWN	sp|Q8LCS8|MUB2_ARATH	Membrane-anchored ubiquitin-fold protein 2 OS=Arabidopsis thaliana GN=MUB2 PE=1 SV=1	MUB2
MD00G1172100	27.3139	13.6979	5.15384	2.31081	1099.16	1335.55	-0.28103	0.41293	0.76287	FALSE	370.856	1499.44	-2.0155	2.04e-08	1.51e-06	DOWN	158.834	1388.44	-3.1279	7.04e-12	9.1e-10	DOWN	sp|Q9LF37|CLPB3_ARATH	Chaperone protein ClpB3, chloroplastic OS=Arabidopsis thaliana GN=CLPB3 PE=1 SV=1	CLPB3
MD06G1115200	0.697324	0.120493	0.287254	0.110238	19.0654	71.6355	-1.9097	0.0077085	0.080593	FALSE	42.2323	80.4314	-0.92941	0.095646	0.30658	FALSE	16.2283	74.436	-2.1975	0.00090737	0.010519	DOWN	sp|Q6IEQ7|WRK24_ORYSJ	WRKY transcription factor WRKY24 OS=Oryza sativa subsp. japonica GN=WRKY24 PE=2 SV=1	WRKY24
MD00G1174600	2.5764	1.13098	0.868916	0.537324	79.962	110.484	-0.46646	0.29498	0.6496	FALSE	55.0175	124.067	-1.1732	0.017727	0.098139	FALSE	33.1124	115.03	-1.7966	0.0016757	0.01714	DOWN	sp|Q9SX38|DRL4_ARATH	Putative disease resistance protein At1g50180 OS=Arabidopsis thaliana GN=At1g50180 PE=3 SV=2	At1g50180
MD00G1175200	0.00490414	0.265029	0.855804	1.28612	18.7384	0.257096	6.1875	0.014984	0.12408	FALSE	64.2571	0.289081	7.7962	7.26e-05	0.0014834	UP	93.9353	0.27088	8.4379	2.74e-05	0.00056945	UP	sp|O49858|C82A3_SOYBN	Cytochrome P450 82A3 OS=Glycine max GN=CYP82A3 PE=2 SV=1	CYP82A3
MD01G1109300	6.25092	20.013	13.3239	11.3921	3521.32	658.242	2.4194	0.012995	0.11374	FALSE	2161.71	739.391	1.5478	0.0014308	0.015636	UP	1773.24	685.366	1.3714	0.0011989	0.013138	UP	sp|Q6TAS3|ADCS_SOLLC	Aminodeoxychorismate synthase, chloroplastic OS=Solanum lycopersicum GN=ADCS PE=2 SV=1	ADCS
MD07G1175300	0.352897	1.203	1.26352	2.10188	233.422	40.4576	2.5285	0.026314	0.17563	FALSE	225.624	45.4493	2.3116	0.013793	0.082592	FALSE	352.196	42.1839	3.0616	2.56e-10	2.27e-08	UP	sp|Q6TAS3|ADCS_SOLLC	Aminodeoxychorismate synthase, chloroplastic OS=Solanum lycopersicum GN=ADCS PE=2 SV=1	ADCS
MD00G1176400	1.5293	0.183241	0.0722929	0.00818392	10.0731	64.4704	-2.6781	0.040613	0.22893	FALSE	4.49431	72.3326	-4.0085	0.00404	0.033933	DOWN	0.57227	66.7391	-6.8657	0.00010762	0.0018198	DOWN	sp|Q84MD8|FHYRK_ARATH	Bifunctional riboflavin kinase/FMN phosphatase OS=Arabidopsis thaliana GN=FHY PE=1 SV=1	FHY
MD00G1178200	2.48501	1.4681	1.13632	0.58125	106.607	118.429	-0.15173	0.8125	0.99698	FALSE	81.0714	133.033	-0.71451	0.12542	0.36351	FALSE	39.973	123.542	-1.6279	0.0034117	0.030428	DOWN	sp|Q9FVV1|GDL28_ARATH	GDSL esterase/lipase At1g71250 OS=Arabidopsis thaliana GN=At1g71250 PE=2 SV=1	At1g71250
MD00G1178900	4.73599	0.0881064	0.371928	0.695695	13.2729	519.446	-5.2904	1.02e-09	6.1e-07	DOWN	57.1711	583.535	-3.3515	8.19e-06	0.00024594	DOWN	107.538	540.471	-2.3294	0.0016431	0.016865	DOWN	sp|C0LGP4|Y3475_ARATH	Probable LRR receptor-like serine/threonine-protein kinase At3g47570 OS=Arabidopsis thaliana GN=At3g47570 PE=2 SV=1	At3g47570
MD00G1179000	23.1734	57.3664	36.3804	34.2907	5716.45	1368.75	2.0623	0.065551	0.29871	FALSE	3250.83	1537.12	1.0806	0.0016275	0.017289	UP	2991.52	1425	1.0699	0.011197	0.076044	FALSE	sp|Q9SZ15|LIP5_ARATH	Protein HOMOLOG OF MAMMALIAN LYST-INTERACTING PROTEIN 5 OS=Arabidopsis thaliana GN=LIP5 PE=1 SV=1	LIP5
MD03G1057400	59.3801	144.201	122.467	135.135	17267.1	4365.67	1.9838	0.0013928	0.025954	UP	13796.6	4904.63	1.4921	6.38e-05	0.0013339	UP	14860.7	4550.19	1.7075	0.0012925	0.013931	UP	sp|Q6IEQ7|WRK24_ORYSJ	WRKY transcription factor WRKY24 OS=Oryza sativa subsp. japonica GN=WRKY24 PE=2 SV=1	WRKY24
MD14G1018700	41.1966	7.07766	24.1595	76.4666	636.242	2385.52	-1.9067	0.0017663	0.030685	DOWN	2109.62	2680.62	-0.34558	0.53513	0.83028	FALSE	6418.33	2489.57	1.3663	0.0639	0.26648	FALSE	sp|Q43497|MDAR_SOLLC	Monodehydroascorbate reductase OS=Solanum lycopersicum GN=AFRR PE=1 SV=1	AFRR
MD00G1181800	2.98437	3.01543	5.40369	2.33976	197.112	140.603	0.48739	0.44862	0.79057	FALSE	371.851	157.925	1.2355	0.0036199	0.031328	UP	154.238	146.456	0.074687	0.70195	0.96547	FALSE	sp|O04200|PXN_ARATH	Peroxisomal nicotinamide adenine dinucleotide carrier OS=Arabidopsis thaliana GN=PXN PE=1 SV=1	PXN
MD00G1182100	5.19399	0.384162	0.467205	1.50673	11.4447	106.942	-3.2241	1.28e-05	0.00084188	DOWN	14.2929	120.056	-3.0703	3.37e-08	2.32e-06	DOWN	42.8144	111.104	-1.3757	0.044632	0.20931	FALSE	--	--	0
MD00G1184200	11.5524	2.35668	2.74007	6.26788	170.079	533.194	-1.6485	0.0027744	0.041236	DOWN	188.67	598.84	-1.6663	6.18e-06	0.0001946	DOWN	423.239	554.995	-0.391	0.34029	0.72007	FALSE	sp|O65355|GGH2_ARATH	Gamma-glutamyl hydrolase 2 OS=Arabidopsis thaliana GN=GGH2 PE=1 SV=2	GGH2
MD00G1186200	0.601735	1.96304	4.64889	2.48015	173.456	29.4036	2.5605	0.34191	0.69676	FALSE	345.437	33.0197	3.387	8.57e-15	2.69e-12	UP	184.484	30.5993	2.5919	0.022338	0.1269	FALSE	sp|Q9FJJ5|EB1B_ARATH	Microtubule-associated protein RP/EB family member 1B OS=Arabidopsis thaliana GN=EB1B PE=1 SV=1	EB1B
MD00G1186700	0.0275679	0.0992717	0.318673	0.585989	6.6991	1.27114	2.3978	0.22369	0.56743	FALSE	23.3949	1.4293	4.0328	0.089057	0.29247	FALSE	37.3786	1.33584	4.8064	0.0014372	0.015152	UP	sp|Q08237|REXO4_YEAST	RNA exonuclease 4 OS=Saccharomyces cerevisiae (strain ATCC 204508 / S288c) GN=REX4 PE=1 SV=1	REX4
MD04G1167700	11.5811	18.4222	42.0072	41.0801	1909.82	794.04	1.2662	0.011473	0.10503	FALSE	4475.1	891.898	2.327	0.045575	0.18755	FALSE	4229.52	826.395	2.3556	0.00069768	0.0085002	UP	sp|Q6IEQ7|WRK24_ORYSJ	WRKY transcription factor WRKY24 OS=Oryza sativa subsp. japonica GN=WRKY24 PE=2 SV=1	WRKY24
MD00G1189000	1.5848	0.135613	0.104789	0.011325	9.30815	75.674	-3.0232	0.00012226	0.0044525	DOWN	7.32873	84.9659	-3.5352	4.87e-06	0.00015941	DOWN	0.744155	78.544	-6.7218	1.22e-09	8.97e-08	DOWN	sp|Q9C5D3|HIP7_ARATH	Heavy metal-associated isoprenylated plant protein 7 OS=Arabidopsis thaliana GN=HIPP07 PE=1 SV=1	HIPP07
MD00G1189600	46.5949	11.4263	16.0721	20.7057	552.67	1652.03	-1.5798	0.005627	0.066299	FALSE	846.117	1855.17	-1.1326	0.0011307	0.013053	DOWN	1067.37	1717.4	-0.68616	0.09342	0.34408	FALSE	sp|Q8VZT0|NLAL1_ARATH	Putative H/ACA ribonucleoprotein complex subunit 1-like protein 1 OS=Arabidopsis thaliana GN=At3g03920 PE=2 SV=1	At3g03920
MD00G1190700	123.487	12.5386	11.0019	33.4455	1198.21	7166.59	-2.5804	0.00021536	0.0067671	DOWN	922.438	8052.68	-3.1259	5e-05	0.0010961	DOWN	2690.26	7484.87	-1.4762	0.090544	0.33711	FALSE	sp|Q6Z8L2|LAC9_ORYSJ	Putative laccase-9 OS=Oryza sativa subsp. japonica GN=LAC9 PE=3 SV=1	LAC9
MD00G1190800	1.58349	2.9144	4.25596	3.15473	181.905	67.0177	1.4406	0.01173	0.10649	FALSE	278.799	75.2932	1.8886	0.010805	0.069	FALSE	196.466	69.9856	1.4892	0.0024067	0.022917	UP	sp|Q96520|PER12_ARATH	Peroxidase 12 OS=Arabidopsis thaliana GN=PER12 PE=1 SV=1	PER12
MD00G1190900	0.0223363	6.07393	32.263	82.8769	418.142	0.95837	8.7692	0.021319	0.15516	FALSE	2292.18	1.07565	11.057	0.019425	0.10488	FALSE	5413.99	0.991401	12.415	2.39e-13	4.36e-11	UP	sp|B8AVF0|BGL12_ORYSI	Beta-glucosidase 12 OS=Oryza sativa subsp. indica GN=BGLU12 PE=3 SV=1	BGLU12
MD00G1191600	3.67435	1.40701	1.24343	0.504989	80.7568	129.041	-0.67617	0.22762	0.57253	FALSE	66.1831	144.915	-1.1307	0.011211	0.070882	FALSE	24.5926	134.207	-2.4482	4.34e-05	0.00084063	DOWN	sp|Q9SJI7|PLA20_ARATH	Phospholipase A1-IIdelta OS=Arabidopsis thaliana GN=At2g42690 PE=1 SV=1	At2g42690
MD00G1192500	13.6136	5.22548	5.69242	3.04119	95.5747	179.932	-0.91275	0.15704	0.47508	FALSE	109.655	202.033	-0.88163	0.038697	0.1687	FALSE	55.3642	187.187	-1.7575	0.0016297	0.016782	DOWN	sp|Q9FR37|AMI1_ARATH	Amidase 1 OS=Arabidopsis thaliana GN=AMI1 PE=1 SV=1	AMI1
MD00G1192700	1.26676	0.490683	0.367592	0.200807	24.9064	42.2732	-0.76322	0.30969	0.66513	FALSE	18.0762	47.4525	-1.3924	0.04143	0.17638	FALSE	9.80934	43.9479	-2.1636	0.0048567	0.039969	DOWN	sp|F4KEW8|NET4A_ARATH	Protein NETWORKED 4A OS=Arabidopsis thaliana GN=NET4A PE=2 SV=1	NET4A
MD00G1199600	9.81352	4.19389	2.96981	2.12883	203.568	284	-0.48038	0.25446	0.60564	FALSE	125.682	318.965	-1.3436	0.00091057	0.010994	DOWN	86.2931	295.889	-1.7777	0.00044093	0.0058469	DOWN	sp|Q9FJP3|RK29_ARATH	50S ribosomal protein L29, chloroplastic OS=Arabidopsis thaliana GN=RPL29 PE=1 SV=1	RPL29
MD11G1059400	23.4626	74.3311	75.4244	106.497	8764.5	1728.36	2.3423	1.85e-05	0.0010993	UP	8606.7	1941.99	2.1479	0.0012505	0.014128	UP	11816.4	1801.47	2.7135	0.00014829	0.0023674	UP	sp|Q6B6R4|WRK24_ORYSI	WRKY transcription factor WRKY24 OS=Oryza sativa subsp. indica GN=WRKY24 PE=2 SV=1	WRKY24
MD00G1200200	2.55575	0.0492224	0.188684	0.149809	0.976744	32.2878	-5.0469	6.25e-05	0.0027308	DOWN	3.47858	36.245	-3.3812	0.00016532	0.0028996	DOWN	2.59734	33.5143	-3.6897	0.00041274	0.0055374	DOWN	--	--	0
MD00G1201300	0.00524494	0.00488827	0.050453	0.211553	0.375871	0.257096	0.54793	1	1	FALSE	3.74019	0.289081	3.6936	0.25419	0.55891	FALSE	15.3602	0.27088	5.8254	0.0007928	0.0094217	UP	sp|Q05085|PTR7_ARATH	Protein NRT1/ PTR FAMILY 6.3 OS=Arabidopsis thaliana GN=NPF6.3 PE=1 SV=1	NPF6.3
MD08G1038600	22.5565	7.13166	8.45321	12.47	635.431	1221.69	-0.94307	0.045131	0.24332	FALSE	694.278	1371.8	-0.98248	0.0026977	0.025113	DOWN	1035.96	1269.58	-0.29338	0.40147	0.77955	FALSE	sp|K4BV52|AOS1_SOLLC	Allene oxide synthase 1, chloroplastic OS=Solanum lycopersicum GN=AOS1 PE=2 SV=1	AOS1
MD00G1203200	0.438733	0.817964	0.855779	1.72449	99.7908	32.1903	1.6323	0.063814	0.294	FALSE	99.2427	36.1511	1.4569	0.2747	0.58386	FALSE	184.421	33.5239	2.4597	1.95e-06	5.83e-05	UP	sp|Q9LPZ3|Y1141_ARATH	G-type lectin S-receptor-like serine/threonine-protein kinase At1g11410 OS=Arabidopsis thaliana GN=At1g11410 PE=3 SV=3	At1g11410
MD00G1204100	16.9288	32.7202	42.1714	65.5305	4089.13	1379.69	1.5674	0.0021855	0.035233	UP	5305.27	1549.89	1.7753	0.00050379	0.0068958	UP	8057.07	1436.66	2.4875	0.0012726	0.013774	UP	sp|Q8VYG0|LRL13_ARATH	LEAF RUST 10 DISEASE-RESISTANCE LOCUS RECEPTOR-LIKE PROTEIN KINASE-like 1.3 OS=Arabidopsis thaliana GN=LRK10L-1.3 PE=2 SV=1	LRK10L-1.3
MD00G1204600	0.559809	0.454109	0.0274727	0	36.4048	34.666	0.070608	0.88691	1	FALSE	2.60104	38.9183	-3.9033	2.54e-05	0.00063123	DOWN	0	35.9729	#NAME?	1.67e-07	6.71e-06	DOWN	sp|Q9ZNR0|C78A6_ARATH	Cytochrome P450 78A6 OS=Arabidopsis thaliana GN=CYP78A6 PE=2 SV=1	CYP78A6
MD00G1208000	0.00697559	0.160373	0.0334091	0.223011	10.6119	0.242753	5.45	0.26038	0.61241	FALSE	1.96712	0.272973	2.8493	0.6414	0.90432	FALSE	11.8401	0.252322	5.5523	0.0051538	0.041836	UP	sp|A2XQE8|SAG39_ORYSI	Senescence-specific cysteine protease SAG39 OS=Oryza sativa subsp. indica GN=OsI_14861 PE=3 SV=1	OsI_14861
MD00G1208200	1.34908	0.544381	0.630823	0.264568	39.6078	64.5999	-0.70575	0.36297	0.71712	FALSE	45.281	72.5608	-0.68028	0.21246	0.50291	FALSE	18.4165	67.3408	-1.8705	0.0043793	0.036915	DOWN	--	--	0
MD00G1208300	3.62494	0.448192	0.680233	0.205702	46.0761	278.894	-2.5976	3.57e-05	0.0017849	DOWN	75.7523	313.297	-2.0482	2.55e-05	0.00063272	DOWN	22.7173	290.326	-3.6758	4.34e-11	4.61e-09	DOWN	sp|Q5EA50|RABEK_BOVIN	Rab9 effector protein with kelch motifs OS=Bos taurus GN=RABEPK PE=2 SV=1	RABEPK
MD00G1208400	6.47298	10.6579	9.59488	4.88503	698.624	269.061	1.3766	0.014404	0.12117	FALSE	603.077	302.137	0.99714	0.0052647	0.041159	UP	292.727	279.934	0.064467	0.8077	1	FALSE	sp|O80588|EDE1_ARATH	Protein ENDOSPERM DEFECTIVE 1 OS=Arabidopsis thaliana GN=EDE1 PE=1 SV=1	EDE1
MD12G1181000	25.8841	29.1796	39.7916	40.6565	2984.39	1642.88	0.86121	0.1179	0.40998	FALSE	3921.31	1844.85	1.0878	0.26168	0.56838	FALSE	3820.48	1708.32	1.1612	0.0062973	0.049139	UP	sp|Q6B6R4|WRK24_ORYSI	WRKY transcription factor WRKY24 OS=Oryza sativa subsp. indica GN=WRKY24 PE=2 SV=1	WRKY24
MD00G1215200	0	0.0578085	0.184032	0	3.16799	0	Inf	0.17608	0.50386	FALSE	11.9803	0	Inf	0.059351	0.22417	FALSE	0	0	NA	NA	NA	NA	sp|O23945|PINS_FRAVE	(-)-alpha-pinene synthase OS=Fragaria vesca PE=1 SV=2	1
MD00G1219900	0	0.580037	4.72633	11.1717	34.8021	0	Inf	0.036595	0.21528	FALSE	292.808	0	Inf	0.026244	0.12963	FALSE	639.063	0	Inf	4.69e-09	2.94e-07	UP	sp|Q7XKV2|BGL13_ORYSJ	Beta-glucosidase 13 OS=Oryza sativa subsp. japonica GN=BGLU13 PE=2 SV=2	BGLU13
MD10G1085800	0.0100046	5.82335	24.1888	69.514	460.203	0.493528	9.8649	0.0093961	0.092277	FALSE	1983	0.553933	11.806	0.023957	0.12157	FALSE	5384.86	0.514258	13.354	4.61e-05	0.00088465	UP	sp|Q8GZP5|AOS3_SOLLC	Allene oxide synthase 3 OS=Solanum lycopersicum GN=AOS3 PE=1 SV=1	AOS3
MD00G1221100	1.4528	2.85022	7.38634	9.07247	42.7405	14.2201	1.5877	0.045139	0.24332	FALSE	106.248	15.9775	2.7333	0.0021317	0.020993	UP	129.453	14.8689	3.1221	8.64e-08	3.75e-06	UP	--	--	0
MD03G1197600	0.107836	1.01473	2.12653	14.3562	95.5604	6.52211	3.873	0.10049	0.37605	FALSE	193.727	7.33067	4.7239	0.00037947	0.00556	UP	1262.99	6.83047	7.5306	1.07e-07	4.54e-06	UP	sp|Q9C519|WRKY6_ARATH	WRKY transcription factor 6 OS=Arabidopsis thaliana GN=WRKY6 PE=1 SV=1	WRKY6
MD00G1060800	4.25062	2.86422	0.904701	0.772513	214.763	176.411	0.2838	1	1	FALSE	54.6114	198.111	-1.859	5.46e-05	0.0011741	DOWN	44.2047	183.648	-2.0547	0.00024165	0.0035849	DOWN	sp|P27061|PPA1_SOLLC	Acid phosphatase 1 OS=Solanum lycopersicum GN=APS1 PE=2 SV=1	APS1
MD01G1002400	2.2181	0.286126	0.648835	1.06569	25.8769	139.08	-2.4262	0.00040959	0.010868	DOWN	59.3203	156.223	-1.397	0.0027615	0.025565	DOWN	97.3513	144.865	-0.57343	0.25053	0.61581	FALSE	sp|Q9SXY1|FAS2_ARATH	Chromatin assembly factor 1 subunit FAS2 OS=Arabidopsis thaliana GN=FAS2 PE=1 SV=1	FAS2
MD01G1004000	0.922261	2.16955	2.20071	1.01297	299.942	79.8478	1.9094	0.0011341	0.022404	UP	295.401	89.6745	1.7199	0.0034797	0.030419	UP	128.197	83.0919	0.62559	0.37734	0.7561	FALSE	sp|Q3B724|CALS5_ARATH	Callose synthase 5 OS=Arabidopsis thaliana GN=CALS5 PE=1 SV=1	CALS5
MD01G1004100	2.57196	5.72408	5.94006	3.29471	1093.21	314.403	1.7979	0.00090616	0.019155	UP	1117	353.084	1.6615	0.00013658	0.0024899	UP	597.681	327.083	0.86972	0.1384	0.44148	FALSE	sp|Q3B724|CALS5_ARATH	Callose synthase 5 OS=Arabidopsis thaliana GN=CALS5 PE=1 SV=1	CALS5
MD01G1004300	24.1294	10.9403	8.66557	1.17365	487.603	742.827	-0.60732	0.50255	0.82915	FALSE	389.53	833.376	-1.0972	0.23682	0.53626	FALSE	51.6969	770.109	-3.8969	0.0029478	0.02709	DOWN	sp|P49107|PSAN_ARATH	Photosystem I reaction center subunit N, chloroplastic OS=Arabidopsis thaliana GN=PSAN PE=1 SV=2	PSAN
MD01G1005400	6.08124	1.68962	1.71014	1.07494	84.9601	194.314	-1.1935	0.042176	0.23367	FALSE	80.0188	218.213	-1.4473	0.00092625	0.011157	DOWN	49.6901	202.218	-2.0249	7.04e-05	0.001269	DOWN	--	--	0
MD01G1008700	4.4135	4.23072	2.50449	0.75249	999.396	595.849	0.74611	0.72681	0.96183	FALSE	510.47	669.355	-0.39094	0.55166	0.84369	FALSE	146.201	621.536	-2.0879	2.5e-05	0.00052728	DOWN	sp|Q7Y1C4|BRC2B_ARATH	Protein BREAST CANCER SUSCEPTIBILITY 2 homolog B OS=Arabidopsis thaliana GN=BRCA2B PE=1 SV=1	BRCA2B
MD01G1009600	0	0.0525633	0.0459241	0	1.13733	0	Inf	0.72733	0.96183	FALSE	0.700745	0	Inf	0.80136	0.98294	FALSE	0	0	NA	NA	NA	NA	sp|P83970|PMA1_WHEAT	Plasma membrane ATPase OS=Triticum aestivum GN=ha1 PE=2 SV=1	ha1
MD01G1010900	1.81952	4.08667	4.54492	16.1228	292.146	78.9209	1.8882	0.042582	0.23496	FALSE	307.014	88.6528	1.7921	0.14607	0.40091	FALSE	1060.73	82.4652	3.6851	0.00061653	0.0076733	UP	sp|Q9FLF4|PUB27_ARATH	U-box domain-containing protein 27 OS=Arabidopsis thaliana GN=PUB27 PE=2 SV=1	PUB27
MD01G1013200	1.43164	3.60595	3.52275	1.30932	85.5127	23.8117	1.8445	0.020846	0.15294	FALSE	89.3216	26.7238	1.7409	0.0018338	0.018842	UP	31.0681	24.7168	0.32994	0.60071	0.91723	FALSE	sp|Q9LQN4|CML17_ARATH	Probable calcium-binding protein CML17 OS=Arabidopsis thaliana GN=CML17 PE=2 SV=1	CML17
MD01G1015700	34.2649	0.307354	0.020523	0	6.50282	407.461	-5.9695	0.013161	0.11468	FALSE	0.371577	456.869	-10.264	0.0010746	0.012526	DOWN	0	420.955	#NAME?	0.0006245	0.0077583	DOWN	--	--	0
MD05G1349800	45.1343	81.3317	75.1361	96.3002	10244.3	3436.03	1.576	0.039248	0.22472	FALSE	8822.24	3858.88	1.193	0.05674	0.21754	FALSE	10947.1	3577.45	1.6135	0.00068946	0.0084249	UP	sp|Q9C519|WRKY6_ARATH	WRKY transcription factor 6 OS=Arabidopsis thaliana GN=WRKY6 PE=1 SV=1	WRKY6
MD01G1017000	5.71611	1.38842	1.84935	2.53118	249.306	723.859	-1.5378	0.0070174	0.076224	FALSE	350.63	812.976	-1.2133	0.00072171	0.0091789	DOWN	468.784	752.88	-0.6835	0.095273	0.34871	FALSE	sp|Q9Y4F3|MARF1_HUMAN	Meiosis arrest female protein 1 OS=Homo sapiens GN=KIAA0430 PE=1 SV=6	KIAA0430
MD01G1018600	5.33751	0.771919	1.70449	0.787104	26.8351	136.106	-2.3425	0.00076279	0.016893	DOWN	63.8531	152.82	-1.259	0.0062469	0.046415	DOWN	28.3681	141.465	-2.3181	5.23e-05	0.00098236	DOWN	sp|Q7G768|BRL2_ORYSJ	Brassinosteroid LRR receptor kinase BRL2 OS=Oryza sativa subsp. japonica GN=BRL2 PE=2 SV=1	BRL2
MD01G1020300	122.666	303.321	327.325	232.108	32354.7	8300.53	1.9627	0.00038004	0.01034	UP	33564.6	9320.82	1.8484	1.71e-05	0.00045259	UP	23093	8633.3	1.4195	0.022112	0.12602	FALSE	sp|Q9LES2|UBA2A_ARATH	UBP1-associated protein 2A OS=Arabidopsis thaliana GN=UBA2A PE=1 SV=1	UBA2A
MD10G1324500	11.6615	30.7519	28.6526	40.3194	3962.7	931.649	2.0886	0.00055532	0.013544	UP	3551.78	1046.26	1.7633	0.013599	0.081652	FALSE	4861.04	969.202	2.3264	0.0024066	0.022917	UP	sp|Q9C519|WRKY6_ARATH	WRKY transcription factor 6 OS=Arabidopsis thaliana GN=WRKY6 PE=1 SV=1	WRKY6
MD11G1213500	0.00425532	0.11518	0.133489	0.994638	10.393	0.236432	5.458	0.024252	0.16702	FALSE	10.8953	0.264852	5.3624	0.0064546	0.047457	UP	79.7904	0.243378	8.3569	0.0002396	0.0035608	UP	sp|Q9C519|WRKY6_ARATH	WRKY transcription factor 6 OS=Arabidopsis thaliana GN=WRKY6 PE=1 SV=1	WRKY6
MD12G1128800	12.4533	2.6939	5.45936	8.5892	395.408	1179.6	-1.5769	0.0031597	0.044837	DOWN	757.704	1324.43	-0.80566	0.049418	0.19856	FALSE	1179.2	1225.22	-0.055227	0.92327	1	FALSE	sp|Q9ZUU0|WRK44_ARATH	WRKY transcription factor 44 OS=Arabidopsis thaliana GN=WRKY44 PE=1 SV=2	WRKY44
MD01G1026000	3.51779	0.500452	1.16519	1.28212	30.2277	152.667	-2.3364	0.00060889	0.014411	DOWN	73.1081	171.431	-1.2295	0.0073454	0.052171	FALSE	80.2878	158.808	-0.98403	0.054119	0.23878	FALSE	sp|Q9LSZ0|APO4_ARATH	APO protein 4, mitochondrial OS=Arabidopsis thaliana GN=APO4 PE=2 SV=2	APO4
MD01G1027700	13.3573	29.8176	32.2315	46.435	2671.85	745.081	1.8424	0.00078616	0.017273	UP	2747.57	836.761	1.7153	9.25e-07	3.99e-05	UP	3861.22	775.526	2.3158	5.6e-06	0.00014596	UP	--	--	0
MD01G1027900	0.0374269	0.788344	4.64486	7.75216	102.024	2.98816	5.0935	0.036736	0.21584	FALSE	616.503	3.35595	7.5212	0.093232	0.30128	FALSE	928.778	3.12199	8.2167	2.35e-12	3.39e-10	UP	sp|Q9T0J1|CRK26_ARATH	Cysteine-rich receptor-like protein kinase 26 OS=Arabidopsis thaliana GN=CRK26 PE=2 SV=1	CRK26
MD01G1028100	7.62527	1.84769	2.6212	2.64106	100.589	267.667	-1.412	0.012419	0.11056	FALSE	134.751	300.489	-1.157	0.0037361	0.032041	DOWN	134.987	278.131	-1.0429	0.021356	0.12314	FALSE	--	--	0
MD01G1028200	7.59577	1.75431	2.26039	2.15474	42.712	116.19	-1.4438	0.017618	0.13729	FALSE	50.2539	130.437	-1.376	0.004378	0.036001	DOWN	47.2916	120.77	-1.3526	0.014242	0.091461	FALSE	--	--	0
MD03G1292900	0.0212278	0.578146	1.07076	0.106838	27.0919	0.715617	5.2425	0.0022684	0.036085	UP	51.0418	0.802678	5.9907	0.0008385	0.010314	UP	5.0516	0.739079	2.7729	0.21569	0.56979	FALSE	sp|O04609|WRK22_ARATH	WRKY transcription factor 22 OS=Arabidopsis thaliana GN=WRKY22 PE=2 SV=1	WRKY22
MD15G1244600	1.33841	1.99165	3.29372	4.85129	209.856	93.4304	1.1674	0.094575	0.36469	FALSE	357.014	104.956	1.7662	0.02887	0.13879	FALSE	505.338	97.3991	2.3753	7.09e-06	0.00017912	UP	sp|Q59MN0|VAC8_CANAL	Vacuolar protein 8 OS=Candida albicans (strain SC5314 / ATCC MYA-2876) GN=VAC8 PE=3 SV=3	VAC8
MD01G1030600	2.3302	3.49316	3.58733	5.86569	189.794	80.7246	1.2334	0.22562	0.56999	FALSE	193.485	90.6541	1.0938	0.1187	0.35265	FALSE	301.815	84.0364	1.8446	0.00013664	0.0022149	UP	sp|Q9LFT9|RAH1E_ARATH	Ras-related protein RABH1e OS=Arabidopsis thaliana GN=RABH1E PE=2 SV=1	RABH1E
MD01G1032000	16.1192	3.86634	4.29086	5.79466	112.469	293.762	-1.3851	0.012396	0.1104	FALSE	118.391	329.879	-1.4784	0.00012986	0.0023909	DOWN	155.824	305.445	-0.97099	0.023649	0.13241	FALSE	sp|Q9C8N5|STOP1_ARATH	Protein SENSITIVE TO PROTON RHIZOTOXICITY 1 OS=Arabidopsis thaliana GN=STOP1 PE=2 SV=1	STOP1
MD01G1032400	5.4379	1.40688	3.18873	13.0187	101.652	258.17	-1.3447	0.036127	0.21366	FALSE	227.826	290.036	-0.3483	0.41429	0.73181	FALSE	901.386	269.042	1.7443	0.0014575	0.015319	UP	sp|P24640|LIP3_MORS1	Lipase 3 OS=Moraxella sp. (strain TA144) GN=lip3 PE=1 SV=1	lip3
MD01G1032800	5.1231	19.1396	13.61	23.327	1870.54	308.035	2.6023	6.13e-05	0.002683	UP	1260.3	346.169	1.8642	0.00010408	0.0019927	UP	2082.59	321.564	2.6952	4.67e-10	3.88e-08	UP	sp|Q9FKQ1|DTX27_ARATH	Protein DETOXIFICATION 27 OS=Arabidopsis thaliana GN=DTX27 PE=2 SV=1	DTX27
MD05G1023100	0.818622	0.140549	0.0897978	0.0128132	4.86471	22.086	-2.1827	0.063472	0.29324	FALSE	3.61998	24.7902	-2.7757	0.0057547	0.043752	DOWN	0.57227	22.9835	-5.3278	0.00017394	0.0027115	DOWN	sp|Q9M2C0|VITH4_ARATH	Vacuolar iron transporter homolog 4 OS=Arabidopsis thaliana GN=At3g43660 PE=2 SV=1	At3g43660
MD09G1200500	22.1423	2.96364	0.988646	0.995753	144.916	833.508	-2.524	0.032948	0.20197	FALSE	55.1768	936.61	-4.0853	0.0011129	0.01288	DOWN	52.0073	871.797	-4.0672	0.002029	0.020021	DOWN	sp|P27061|PPA1_SOLLC	Acid phosphatase 1 OS=Solanum lycopersicum GN=APS1 PE=2 SV=1	APS1
MD13G1018700	0	0	0.0216397	0.226118	0	0	NA	NA	NA	NA	1.21373	0	Inf	0.62893	0.89735	FALSE	11.7701	0	Inf	0.0009162	0.010594	UP	sp|Q9ZUA5|VIT1_ARATH	Vacuolar iron transporter 1 OS=Arabidopsis thaliana GN=VIT1 PE=2 SV=1	VIT1
MD01G1034400	13.166	12.3718	21.1256	20.0108	780.354	578.51	0.43179	0.36276	0.71695	FALSE	1407.64	649.859	1.1151	0.0010767	0.01254	UP	1311.23	603.364	1.1198	0.084632	0.32207	FALSE	sp|Q9SJZ2|PER17_ARATH	Peroxidase 17 OS=Arabidopsis thaliana GN=PER17 PE=2 SV=1	PER17
MD01G1034500	0.732117	1.15446	7.55962	22.6438	64.949	29.4887	1.1391	0.22984	0.57541	FALSE	462.06	33.1442	3.8013	2.72e-05	0.00066677	UP	1347.05	30.8551	5.4482	2.5e-28	4.89e-25	UP	sp|Q9SJZ2|PER17_ARATH	Peroxidase 17 OS=Arabidopsis thaliana GN=PER17 PE=2 SV=1	PER17
MD01G1034900	0	0.747498	0.669368	1.66425	41.0021	0	Inf	0.075483	0.32416	FALSE	38.9182	0	Inf	0.092174	0.29883	FALSE	85.9969	0	Inf	1.04e-16	3.37e-14	UP	sp|Q9SJZ2|PER17_ARATH	Peroxidase 17 OS=Arabidopsis thaliana GN=PER17 PE=2 SV=1	PER17
MD01G1036500	21.3863	96.221	72.254	82.9863	13025.7	1713.49	2.9263	0.015604	0.12738	FALSE	8967.91	1924.54	2.2203	0.0032033	0.028619	UP	9928.14	1784.83	2.4757	3.1e-06	8.75e-05	UP	sp|P47924|RIBA1_ARATH	Bifunctional riboflavin biosynthesis protein RIBA 1, chloroplastic OS=Arabidopsis thaliana GN=RIBA1 PE=1 SV=2	RIBA1
MD01G1036900	7.13086	8.0578	10.4624	12.4656	565.242	315.181	0.84269	0.14058	0.44931	FALSE	698.313	353.952	0.98032	0.0077137	0.053997	FALSE	804.408	327.961	1.2944	0.0020958	0.020581	UP	sp|Q8LFY8|ATL54_ARATH	RING-H2 finger protein ATL54 OS=Arabidopsis thaliana GN=ATL54 PE=2 SV=2	ATL54
MD01G1037500	1.10512	0.129424	0.366124	0.369468	9.44973	60.8806	-2.6876	0.0014577	0.026808	DOWN	28.9827	68.367	-1.2381	0.034308	0.15599	FALSE	28.4325	63.3223	-1.1552	0.10442	0.37017	FALSE	sp|Q8LGA1|CCD41_ARATH	Cyclin-D4-1 OS=Arabidopsis thaliana GN=CYCD4-1 PE=1 SV=2	CYCD4-1
MD01G1037600	6.60566	6.15324	9.48223	10.7478	372.985	267.611	0.47898	0.32252	0.67783	FALSE	577.347	300.554	0.94181	0.0084828	0.057783	FALSE	640.375	278.713	1.2001	0.0057278	0.045595	UP	--	--	0
MD01G1037900	0.727109	0.74536	1.55977	0.698185	89.6738	58.087	0.62647	0.27894	0.63399	FALSE	184.579	65.2284	1.5007	0.00040219	0.0057991	UP	81.6731	60.4512	0.43409	0.44455	0.81735	FALSE	--	--	0
MD01G1038000	40.2191	68.1837	246.549	315.545	3244.25	1326.17	1.2906	0.14581	0.45762	FALSE	12492.7	1490.5	3.0672	0.0006207	0.0081223	UP	15462.6	1386.75	3.479	6.41e-13	1.06e-10	UP	sp|Q9SJY5|PUMP5_ARATH	Mitochondrial uncoupling protein 5 OS=Arabidopsis thaliana GN=PUMP5 PE=2 SV=1	PUMP5
MD01G1038800	11.2666	2.65428	4.24631	7.30973	200.419	568.291	-1.5036	0.0089065	0.088967	FALSE	320.439	638.334	-0.99426	0.0050214	0.039791	DOWN	536.869	592.587	-0.14246	0.76152	0.98831	FALSE	sp|Q7XSZ4|HACDA_ORYSJ	Very-long-chain (3R)-3-hydroxyacyl-CoA dehydratase PASTICCINO 2A OS=Oryza sativa subsp. japonica GN=PAS2A PE=2 SV=2	PAS2A
MD01G1039500	22.214	3.72877	3.98544	3.27072	341.701	1461.45	-2.0966	0.0002643	0.0078568	DOWN	382.645	1640.9	-2.1004	6.37e-09	5.58e-07	DOWN	313.992	1519.39	-2.2747	7.67e-08	3.37e-06	DOWN	--	--	0
MD01G1039700	0.607367	1.94743	1.58734	1.86925	296.007	55.1936	2.4231	0.017732	0.13794	FALSE	226.329	62.0048	1.868	0.029094	0.13951	FALSE	253.105	57.5953	2.1357	1.9e-05	0.00041949	UP	sp|F4IJK1|NET2D_ARATH	Protein NETWORKED 2D OS=Arabidopsis thaliana GN=NET2D PE=3 SV=1	NET2D
MD00G1130600	2.38089	4.18138	17.9663	40.5561	328.156	134.687	1.2848	0.21367	0.55461	FALSE	1531.72	151.429	3.3384	0.00045855	0.0064232	UP	3261.97	141.332	4.5286	9.74e-05	0.0016749	UP	sp|P47082|AVT1_YEAST	Vacuolar amino acid transporter 1 OS=Saccharomyces cerevisiae (strain ATCC 204508 / S288c) GN=AVT1 PE=1 SV=1	AVT1
MD01G1104600	2.11948	0.275904	0.822922	0.781627	13.4559	75.693	-2.4919	0.0019696	0.03271	DOWN	42.7516	85.019	-0.99181	0.062834	0.23256	FALSE	39.2231	78.7785	-1.0061	0.13007	0.42502	FALSE	sp|P47082|AVT1_YEAST	Vacuolar amino acid transporter 1 OS=Saccharomyces cerevisiae (strain ATCC 204508 / S288c) GN=AVT1 PE=1 SV=1	AVT1
MD01G1041500	3.25866	7.08203	6.83231	3.78386	424.85	128.641	1.7236	0.0024374	0.0379	UP	405.109	144.461	1.4876	0.043971	0.18349	FALSE	215.832	134.058	0.68705	0.18397	0.52134	FALSE	sp|Q9LSL6|DOF57_ARATH	Dof zinc finger protein DOF5.7 OS=Arabidopsis thaliana GN=DOF5.7 PE=2 SV=1	DOF5.7
MD06G1014600	6.14492	0.635329	1.70921	1.62057	51.5985	372.884	-2.8533	5.39e-06	0.00043961	DOWN	151.069	418.729	-1.4708	0.00016708	0.0029241	DOWN	136.714	387.962	-1.5048	0.0025948	0.024314	DOWN	sp|P42735|CDI8_ARATH	Cadmium-induced protein AS8 OS=Arabidopsis thaliana GN=At4g19070 PE=2 SV=1	At4g19070
MD01G1042500	0.303464	6.4824	8.18997	19.2563	562.986	15.5165	5.1812	0.0048296	0.059845	FALSE	664.464	17.4393	5.2518	0.047715	0.19387	FALSE	1490.92	16.2405	6.5205	1.65e-08	8.72e-07	UP	sp|Q9ZRF1|MTDH_FRAAN	Probable mannitol dehydrogenase OS=Fragaria ananassa GN=CAD PE=2 SV=1	CAD
MD01G1043300	0.900935	9.90065	20.1803	19.5497	1302.79	74.6026	4.1262	0.094395	0.36441	FALSE	2745.45	83.811	5.0338	0.13288	0.37763	FALSE	2477.9	77.8763	4.9918	0.00038138	0.0051843	UP	sp|Q8RJP2|RHIE_DICD3	Rhamnogalacturonate lyase OS=Dickeya dadantii (strain 3937) GN=rhiE PE=1 SV=1	rhiE
MD01G1045300	8.42202	1.88799	2.73347	3.06918	250.824	769.53	-1.6173	0.0045238	0.057417	FALSE	368.715	864.172	-1.2288	0.00066799	0.0086167	DOWN	403.325	801.418	-0.99061	0.024178	0.13467	FALSE	sp|Q9LXA8|BXL6_ARATH	Probable beta-D-xylosidase 6 OS=Arabidopsis thaliana GN=BXL6 PE=2 SV=1	BXL6
MD04G1027800	13.56	1.20752	0.610376	0.136845	98.4895	715.588	-2.8611	0.0027023	0.040655	DOWN	45.4919	804.256	-4.144	0.00020252	0.0034027	DOWN	10.1954	748.063	-6.1972	2.22e-06	6.56e-05	DOWN	sp|P47082|AVT1_YEAST	Vacuolar amino acid transporter 1 OS=Saccharomyces cerevisiae (strain ATCC 204508 / S288c) GN=AVT1 PE=1 SV=1	AVT1
MD01G1045800	93.8635	38.8415	21.9236	26.7235	3815.47	5496.45	-0.52664	0.24871	0.59745	FALSE	1943.67	6171.45	-1.6668	7.51e-07	3.34e-05	DOWN	2237.44	5715.26	-1.353	0.001343	0.014358	DOWN	sp|Q38827|IAA9_ARATH	Auxin-responsive protein IAA9 OS=Arabidopsis thaliana GN=IAA9 PE=1 SV=1	IAA9
MD01G1046200	12.1651	46.1306	56.1045	44.2763	5236.55	997.29	2.3925	0.049068	0.25556	FALSE	7037.47	1120.29	2.6512	3.92e-06	0.00013312	UP	5373.77	1040.72	2.3684	0.0073926	0.055486	FALSE	sp|Q9T074|PCKA_ARATH	Phosphoenolpyruvate carboxykinase (ATP) OS=Arabidopsis thaliana GN=PCKA PE=1 SV=1	PCKA
MD01G1046900	1.44909	0.312297	0.446689	0.664314	46.1476	148.25	-1.6837	0.0098795	0.095707	FALSE	66.4652	166.514	-1.325	0.0039226	0.033242	DOWN	98.9836	154.367	-0.6411	0.1939	0.53615	FALSE	sp|Q9SCJ4|KN8B_ARATH	Kinesin-like protein KIN-8B OS=Arabidopsis thaliana GN=KIN8B PE=2 SV=1	KIN8B
MD09G1051600	2.59724	0.843464	1.4755	0.677796	53.7718	115.043	-1.0973	0.10564	0.38701	FALSE	99.4218	129.162	-0.37755	0.77182	0.97411	FALSE	44.0114	119.669	-1.4431	0.0063924	0.049702	DOWN	sp|P47082|AVT1_YEAST	Vacuolar amino acid transporter 1 OS=Saccharomyces cerevisiae (strain ATCC 204508 / S288c) GN=AVT1 PE=1 SV=1	AVT1
MD01G1049100	8.15101	13.1135	17.3377	8.26676	848.184	355.944	1.2527	0.017116	0.13457	FALSE	1137.39	399.641	1.509	1.69e-05	0.00044751	UP	520.417	370.214	0.49131	0.20696	0.55602	FALSE	--	--	0
MD01G1049500	0.312828	5.58684	7.22627	8.61175	193.023	7.14534	4.7556	6.06e-08	1.49e-05	UP	260.486	8.02858	5.0199	0.001172	0.013415	UP	294.314	7.44926	5.3041	0.00031274	0.0044118	UP	--	--	0
MD01G1049600	149.464	946.207	536.751	438.375	28911.2	2721.92	3.4089	0.0024138	0.03762	UP	15501.7	3059.18	2.3412	0.036332	0.16194	FALSE	12019.8	2845.12	2.0789	0.027829	0.14926	FALSE	sp|Q58FX0|BAP2_ARATH	BON1-associated protein 2 OS=Arabidopsis thaliana GN=BAP2 PE=1 SV=1	BAP2
MD01G1049700	6.26817	12.4114	12.1159	5.42264	800.831	264.031	1.6008	0.0026682	0.040349	UP	775.049	296.575	1.3859	0.021198	0.11145	FALSE	333.258	275.6	0.27406	0.65471	0.94231	FALSE	sp|Q93Z92|RING4_ARATH	E3 ubiquitin-protein ligase At4g11680 OS=Arabidopsis thaliana GN=At4g11680 PE=2 SV=1	At4g11680
MD01G1050100	25.8983	60.7123	45.5587	30.6304	7044.84	1908.94	1.8838	0.00062252	0.014627	UP	5139.41	2143.84	1.2614	0.00025946	0.004104	UP	3391.9	1988.07	0.77072	0.24635	0.61043	FALSE	sp|Q96287|KSG8_ARATH	Shaggy-related protein kinase theta OS=Arabidopsis thaliana GN=ASK8 PE=2 SV=3	ASK8
MD01G1051400	44.9942	81.4598	75.9429	42.4074	6976.52	2474.52	1.4954	0.006409	0.071916	FALSE	6305.88	2778.64	1.1823	0.00071435	0.0090938	UP	3384.41	2574.8	0.39444	0.30031	0.67732	FALSE	sp|P92965|RS40_ARATH	Serine/arginine-rich splicing factor RS40 OS=Arabidopsis thaliana GN=RS40 PE=1 SV=2	RS40
MD01G1051700	23.0098	29.5665	33.6198	19.7994	2375.36	1195.81	0.99016	0.062376	0.2903	FALSE	2630.25	1342.66	0.9701	0.003916	0.033218	UP	1487.2	1243.43	0.25828	0.47446	0.83852	FALSE	sp|Q10NX8|BGAL6_ORYSJ	Beta-galactosidase 6 OS=Oryza sativa subsp. japonica GN=Os03g0255100 PE=1 SV=2	Os03g0255100
MD13G1279400	0.734415	0.0686286	0.0380749	0.0477139	6.50282	39.0721	-2.587	0.0039575	0.052553	FALSE	2.8878	43.8748	-3.9254	0.00032604	0.0049336	DOWN	3.60649	40.7496	-3.4981	0.0012147	0.013266	DOWN	sp|P47082|AVT1_YEAST	Vacuolar amino acid transporter 1 OS=Saccharomyces cerevisiae (strain ATCC 204508 / S288c) GN=AVT1 PE=1 SV=1	AVT1
MD01G1054900	109.186	22.3185	17.1984	11.5135	450.254	1435.17	-1.6724	0.001584	0.028351	DOWN	328.848	1611.94	-2.2933	3.42e-10	4.2e-08	DOWN	211.571	1495.66	-2.8216	5.56e-10	4.54e-08	DOWN	sp|P93788|REMO_SOLTU	Remorin OS=Solanum tuberosum PE=1 SV=1	1
MD01G1055000	153.073	33.7602	23.9741	13.9036	1180.51	3562.42	-1.5934	0.0026151	0.039872	DOWN	816.061	4001.22	-2.2937	1.24e-08	9.81e-07	DOWN	449.833	3713.92	-3.0455	7.89e-10	6.19e-08	DOWN	sp|O80837|REMO_ARATH	Remorin OS=Arabidopsis thaliana GN=DBP PE=1 SV=1	DBP
MD07G1224900	11.3784	1.72286	3.19393	3.18068	254.28	1176.46	-2.21	0.00011112	0.0041471	DOWN	481.931	1321.3	-1.4551	4.81e-05	0.0010629	DOWN	464.216	1224.81	-1.3997	0.0019069	0.019002	DOWN	sp|F4IY62|UGPA3_ARATH	UTP--glucose-1-phosphate uridylyltransferase 3, chloroplastic OS=Arabidopsis thaliana GN=UGP3 PE=1 SV=1	UGP3
MD01G1055300	0	0	0.079977	0.545478	0	0	NA	NA	NA	NA	3.30106	0	Inf	0.2439	0.54529	FALSE	20.4041	0	Inf	1.35e-05	0.00031258	UP	sp|Q6EUH7|ADF1_ORYSJ	Actin-depolymerizing factor 1 OS=Oryza sativa subsp. japonica GN=ADF1 PE=2 SV=1	ADF1
MD01G1057600	1.91053	0.204125	0.26662	0.545002	16.1488	109.416	-2.7603	0.00013346	0.0047614	DOWN	21.8063	122.877	-2.4944	3.46e-06	0.00012071	DOWN	44.9382	113.716	-1.3394	0.016178	0.10058	FALSE	sp|Q9M2D2|YU88_ARATH	UPF0187 protein At3g61320, chloroplastic OS=Arabidopsis thaliana GN=At3g61320 PE=2 SV=2	At3g61320
MD01G1058300	4.13777	0.466948	1.01176	1.90583	29.5105	168.596	-2.5143	8.23e-05	0.0033075	DOWN	60.7518	189.355	-1.6401	0.00019311	0.0032771	DOWN	109.953	175.598	-0.67539	0.23573	0.59703	FALSE	sp|O14734|ACOT8_HUMAN	Acyl-coenzyme A thioesterase 8 OS=Homo sapiens GN=ACOT8 PE=1 SV=1	ACOT8
MD01G1058500	4.24159	0.627256	1.03032	1.31608	19.2803	82.5111	-2.0975	0.0032611	0.045782	DOWN	29.6613	92.6701	-1.6435	0.0020995	0.020782	DOWN	35.4102	85.9209	-1.2788	0.056434	0.24557	FALSE	sp|P00516|KGP1_BOVIN	cGMP-dependent protein kinase 1 OS=Bos taurus GN=PRKG1 PE=1 SV=2	PRKG1
MD01G1059600	4.03026	0.329004	0.541259	0.93727	29.3988	253.671	-3.1091	1.36e-05	0.00087612	DOWN	49.2878	285.02	-2.5318	0.00015196	0.0027096	DOWN	83.6218	264.303	-1.6602	0.019617	0.11568	FALSE	sp|P93604|LRK10_WHEAT	Rust resistance kinase Lr10 OS=Triticum aestivum GN=LRK10 PE=2 SV=1	LRK10
MD01G1059900	3.61491	0.56032	0.876724	1.32048	16.4696	72.5048	-2.1383	0.0044955	0.05713	FALSE	25.8254	81.3944	-1.6561	0.0027727	0.025652	DOWN	38.0757	75.3647	-0.98502	0.10573	0.37275	FALSE	sp|O65258|BAM2_ARATH	Beta-amylase 2, chloroplastic OS=Arabidopsis thaliana GN=BAM2 PE=1 SV=2	BAM2
MD01G1060900	7.32644	4.27315	3.09101	1.72587	260.253	302.181	-0.2155	0.74389	0.9682	FALSE	191.578	339.306	-0.82466	0.034476	0.15651	FALSE	102.759	314.393	-1.6133	0.00058979	0.0074007	DOWN	--	--	0
MD01G1061100	2.3755	4.18692	3.68529	2.93668	720.235	251.569	1.5175	0.0093687	0.092161	FALSE	593.177	282.51	1.0702	0.003325	0.029458	UP	457.017	261.781	0.80388	0.070851	0.28609	FALSE	sp|Q9ZRZ8|RH28_ARATH	DEAD-box ATP-dependent RNA helicase 28 OS=Arabidopsis thaliana GN=RH28 PE=2 SV=1	RH28
MD01G1061500	18.775	26.7787	28.4038	20.3261	2974.92	1346.38	1.1438	0.035422	0.21105	FALSE	3065.64	1511.91	1.0198	0.0029551	0.02686	UP	2158.71	1400.7	0.62402	0.16177	0.48417	FALSE	sp|Q0WMJ8|SIPL4_ARATH	Signal peptide peptidase-like 4 OS=Arabidopsis thaliana GN=SPPL4 PE=2 SV=1	SPPL4
MD01G1061600	0.316392	0.0642024	0.0706686	0.0129188	11.0654	33.4627	-1.5965	0.045801	0.24549	FALSE	11.0021	37.5889	-1.7725	0.021255	0.11166	FALSE	1.89639	34.8667	-4.2005	9.24e-05	0.0016018	DOWN	sp|G9LZD7|XIAO_ORYSJ	Probable inactive leucine-rich repeat receptor kinase XIAO OS=Oryza sativa subsp. japonica GN=XIAO PE=2 SV=1	XIAO
MD01G1062600	1.24812	4.78216	3.33388	4.0004	174.508	26.3282	2.7286	0.077245	0.32738	FALSE	108.511	29.5586	1.8762	0.0011148	0.012894	UP	126.616	27.359	2.2104	0.014228	0.091418	FALSE	sp|Q8LF97|ASK21_ARATH	SKP1-like protein 21 OS=Arabidopsis thaliana GN=ASK21 PE=2 SV=1	ASK21
MD01G1064600	0.908689	0.106667	0.188542	0.478256	18.2391	96.999	-2.4109	0.00065615	0.015185	DOWN	30.9365	108.977	-1.8166	0.0054521	0.042147	DOWN	76.5418	100.972	-0.39963	0.44467	0.81742	FALSE	sp|G9LZD7|XIAO_ORYSJ	Probable inactive leucine-rich repeat receptor kinase XIAO OS=Oryza sativa subsp. japonica GN=XIAO PE=2 SV=1	XIAO
MD01G1065200	17.6494	2.67709	7.95308	13.148	138.945	648.105	-2.2217	0.00023719	0.0072573	DOWN	429.154	727.986	-0.76242	0.07252	0.25499	FALSE	690.387	674.53	0.033523	0.8533	1	FALSE	--	--	0
MD01G1066300	11.3431	3.33857	3.91059	4.71831	462.368	1134.52	-1.295	0.025426	0.17196	FALSE	577.573	1273.95	-1.1412	0.0011933	0.013613	DOWN	682.152	1180.22	-0.79089	0.06257	0.26267	FALSE	sp|Q39203|SD22_ARATH	G-type lectin S-receptor-like serine/threonine-protein kinase SD2-2 OS=Arabidopsis thaliana GN=SD22 PE=1 SV=1	SD22
MD01G1067800	186.267	4.2305	3.35261	5.17548	114.948	3157.96	-4.7799	0.0001713	0.0057366	DOWN	84.1753	3543.16	-5.3955	5.23e-05	0.001137	DOWN	124.032	3274.51	-4.7225	0.00025144	0.0037033	DOWN	sp|Q9SUS5|RHA1B_ARATH	E3 ubiquitin-protein ligase RHA1B OS=Arabidopsis thaliana GN=RHA1B PE=2 SV=1	RHA1B
MD01G1068300	36.5292	16.6079	13.4732	12.6226	2729	3649.47	-0.41931	0.30195	0.65772	FALSE	2008.05	4097.61	-1.029	0.0024127	0.023064	DOWN	1871.68	3796.31	-1.0203	0.0067297	0.051689	FALSE	sp|Q9FLW0|Y5241_ARATH	Probable receptor-like protein kinase At5g24010 OS=Arabidopsis thaliana GN=At5g24010 PE=1 SV=1	At5g24010
MD03G1108500	13.8161	27.2298	27.7443	25.1519	2663.18	835.022	1.6733	0.0030114	0.043506	UP	2539.75	937.935	1.4371	3.52e-05	0.00081663	UP	2251.37	869.815	1.372	0.0011999	0.013143	UP	sp|Q39023|MPK3_ARATH	Mitogen-activated protein kinase 3 OS=Arabidopsis thaliana GN=MPK3 PE=1 SV=2	MPK3
MD01G1070300	65.4277	398.946	198.329	239.968	33108.4	3155.02	3.3915	0.045009	0.24293	FALSE	14564.6	3543.23	2.0393	2.57e-09	2.51e-07	UP	17374.4	3282.29	2.4042	0.00020124	0.0030604	UP	sp|O03982|HIP39_ARATH	Heavy metal-associated isoprenylated plant protein 39 OS=Arabidopsis thaliana GN=HIPP39 PE=2 SV=1	HIPP39
MD01G1070600	3.84122	2.07495	1.19917	1.52708	251.491	277.883	-0.14397	0.60487	0.89531	FALSE	128.664	312.067	-1.2782	0.0014785	0.016033	DOWN	164.009	289.009	-0.81734	0.049094	0.2234	FALSE	--	--	0
MD01G1071800	0.4253	0.0108344	0	0	0.408076	12.6344	-4.9524	0.013893	0.11887	FALSE	0	14.1947	#NAME?	0.00088716	0.01076	DOWN	0	13.1879	#NAME?	0.002293	0.022049	DOWN	sp|P46519|LEA14_SOYBN	Desiccation protectant protein Lea14 homolog OS=Glycine max PE=2 SV=1	2
MD01G1071900	6.98465	1.82138	0.859777	0.875408	73.7892	167.945	-1.1865	0.025482	0.17217	FALSE	30.7195	188.663	-2.6186	4.55e-07	2.19e-05	DOWN	30.2846	175.22	-2.5325	8.62e-06	0.00021216	DOWN	sp|P46519|LEA14_SOYBN	Desiccation protectant protein Lea14 homolog OS=Glycine max PE=2 SV=1	2
MD01G1072100	23.2496	2.31574	9.61598	8.59086	69.3284	522.309	-2.9134	8.55e-06	0.00062578	DOWN	300.525	586.777	-0.96533	0.29274	0.60542	FALSE	267.482	543.823	-1.0237	0.24052	0.60317	FALSE	sp|Q6DST1|Y1465_ARATH	Late embryogenesis abundant protein At1g64065 OS=Arabidopsis thaliana GN=At1g64065 PE=2 SV=1	At1g64065
MD01G1072400	0	0.024944	0.0547181	0	0.375871	0	Inf	0.94403	1	FALSE	0.700745	0	Inf	0.80136	0.98294	FALSE	0	0	NA	NA	NA	NA	--	--	0
MD01G1073000	3.39752	1.65356	0.783412	0.8274	129.919	155.323	-0.25765	0.56863	0.8748	FALSE	53.2391	174.404	-1.7119	0.00056212	0.007488	DOWN	54.9683	161.803	-1.5576	0.0023728	0.022683	DOWN	sp|Q3EBF7|SLD2_ARATH	Delta(8)-fatty-acid desaturase 2 OS=Arabidopsis thaliana GN=SLD2 PE=1 SV=1	SLD2
MD01G1073200	2.97509	0.423998	0.894424	1.02298	26.1796	133.576	-2.3512	0.00073045	0.01642	DOWN	57.4601	149.961	-1.384	0.0038229	0.032607	DOWN	65.7927	138.861	-1.0776	0.044034	0.20727	FALSE	sp|Q8S8M5|ABIL1_ARATH	Protein ABIL1 OS=Arabidopsis thaliana GN=ABIL1 PE=1 SV=1	ABIL1
MD01G1073600	146.632	174.576	61.9196	19.7633	38230.8	20655.8	0.88819	0.10697	0.38983	FALSE	12885.7	23187.7	-0.84759	0.042739	0.17979	FALSE	4043.91	21476.6	-2.4089	7.67e-07	2.58e-05	DOWN	sp|O82345|BAG6_ARATH	BAG family molecular chaperone regulator 6 OS=Arabidopsis thaliana GN=BAG6 PE=1 SV=1	BAG6
MD01G1074400	57.8649	58.205	40.4295	18.3622	2656.69	1656.62	0.68139	0.22558	0.56994	FALSE	1742.26	1859.99	-0.094334	0.81759	0.99083	FALSE	770.929	1721.79	-1.1592	0.0036552	0.032158	DOWN	sp|O04616|CUT1A_ARATH	Protein CURVATURE THYLAKOID 1A, chloroplastic OS=Arabidopsis thaliana GN=CURT1A PE=1 SV=1	CURT1A
MD01G1075600	8.26701	1.34224	3.82865	6.22952	26.1275	115.317	-2.142	0.0032851	0.046088	DOWN	80.2439	129.539	-0.69092	0.10114	0.31704	FALSE	124.631	120.199	0.052233	0.83361	1	FALSE	sp|P93033|FUM1_ARATH	Fumarate hydratase 1, mitochondrial OS=Arabidopsis thaliana GN=FUM1 PE=1 SV=2	FUM1
MD01G1076100	15.5192	3.82792	5.68076	7.51448	362.622	1033.78	-1.5114	0.0081787	0.083876	FALSE	561.207	1160.94	-1.0487	0.0027436	0.025446	DOWN	720.067	1075.77	-0.57917	0.19544	0.53852	FALSE	sp|P38557|TBG1_ARATH	Tubulin gamma-1 chain OS=Arabidopsis thaliana GN=TUBG1 PE=1 SV=1	TUBG1
MD01G1041100	13.5856	3.47881	4.62164	5.32655	243.303	653.13	-1.4246	0.016079	0.12923	FALSE	326.982	733.495	-1.1656	0.0014504	0.015803	DOWN	369.505	679.318	-0.87849	0.044985	0.21035	FALSE	sp|P94538|YSGA_BACSU	Uncharacterized tRNA/rRNA methyltransferase YsgA OS=Bacillus subtilis (strain 168) GN=ysgA PE=3 SV=2	ysgA
MD01G1077600	0.0115229	0.0404457	0.0527915	0.341812	1.706	0.257096	2.7302	0.72633	0.96183	FALSE	1.96712	0.289081	2.7665	0.64057	0.90372	FALSE	11.2036	0.27088	5.3702	0.0057981	0.045976	UP	--	--	0
MD01G1077700	2.7689	2.48574	3.64899	9.8995	39.8289	27.7188	0.52295	0.49169	0.82069	FALSE	53.8056	31.1432	0.78884	0.15751	0.41932	FALSE	144.37	28.9273	2.3193	1.42e-05	0.00032692	UP	--	--	0
MD01G1077800	17.7292	11.0277	27.9245	37.7459	516.815	533.13	-0.04484	0.9301	1	FALSE	1211.89	598.946	1.0168	0.25771	0.56359	FALSE	1640.25	555.48	1.5621	0.0008584	0.010065	UP	sp|D7U6G6|ANRPN_VITVI	Anthocyanidin reductase ((2S)-flavan-3-ol-forming) OS=Vitis vinifera GN=ANR PE=3 SV=1	ANR
MD01G1077900	14.9114	13.4834	23.9161	32.0944	991.381	691.094	0.52056	0.35862	0.7124	FALSE	1618.47	776.256	1.06	0.12073	0.35602	FALSE	2158.53	719.662	1.5847	8.25e-05	0.0014521	UP	sp|D7U6G6|ANRPN_VITVI	Anthocyanidin reductase ((2S)-flavan-3-ol-forming) OS=Vitis vinifera GN=ANR PE=3 SV=1	ANR
MD01G1079500	27.9078	4.44518	8.79453	12.1554	424.482	1849.75	-2.1236	0.00018845	0.006149	DOWN	853.675	2077.35	-1.283	0.00025617	0.0040693	DOWN	1160.67	1924.56	-0.72958	0.0895	0.3348	FALSE	--	--	0
MD01G1079600	21.0764	2.36282	4.73765	6.20605	305.297	1834.76	-2.5873	5.87e-06	0.00047166	DOWN	621.413	2060.66	-1.7295	8.55e-07	3.73e-05	DOWN	775.875	1908.32	-1.2984	0.0023007	0.022102	DOWN	sp|O65717|CNGC1_ARATH	Cyclic nucleotide-gated ion channel 1 OS=Arabidopsis thaliana GN=CNGC1 PE=1 SV=1	CNGC1
MD01G1082200	38.3611	5.71493	11.158	10.3915	381.787	1902.21	-2.3168	4.32e-05	0.0020495	DOWN	785.488	2136.85	-1.4438	0.0053578	0.041639	DOWN	708.822	1983.14	-1.4843	0.029972	0.15735	FALSE	sp|Q9LNJ3|APF2_ARATH	Aspartyl protease family protein 2 OS=Arabidopsis thaliana GN=APF2 PE=2 SV=1	APF2
MD01G1083300	7.94247	10.0405	12.6028	8.21899	483.243	246.741	0.96975	0.077435	0.3278	FALSE	585.606	277.072	1.0797	0.0025208	0.023846	UP	367.669	256.639	0.51867	0.18989	0.53056	FALSE	sp|P51615|MAOX_VITVI	NADP-dependent malic enzyme OS=Vitis vinifera PE=2 SV=1	2
MD01G1083400	3.72995	0.502457	0.383277	0.295632	70.3133	364.095	-2.3724	6.52e-05	0.0028158	DOWN	55.1897	408.761	-2.8888	4.24e-12	8.3e-10	DOWN	41.299	378.254	-3.1952	1.51e-10	1.43e-08	DOWN	sp|Q9C5W9|ARFR_ARATH	Auxin response factor 18 OS=Arabidopsis thaliana GN=ARF18 PE=2 SV=1	ARF18
MD01G1083500	31.0317	33.831	24.8277	4.57026	1931.45	1141.79	0.75839	0.15269	0.46808	FALSE	1354.42	1282	0.079282	0.7786	0.97661	FALSE	240.232	1188.67	-2.3068	9.8e-07	3.22e-05	DOWN	sp|Q9M160|Y4095_ARATH	Uncharacterized protein At4g00950 OS=Arabidopsis thaliana GN=At4g00950 PE=2 SV=1	At4g00950
MD01G1083900	7.69568	3.56961	3.24866	2.41021	461.88	641.608	-0.47417	0.31844	0.67445	FALSE	403.075	720.556	-0.83806	0.024519	0.12365	FALSE	289.849	668.629	-1.2059	0.0060133	0.047336	DOWN	sp|O81629|KLCR1_ARATH	Protein KINESIN LIGHT CHAIN-RELATED 1 OS=Arabidopsis thaliana GN=KLCR1 PE=1 SV=1	KLCR1
MD01G1084300	2.87076	0.156332	0.36207	1.09676	7.12966	93.4374	-3.7121	4.1e-06	0.00036699	DOWN	16.4596	104.981	-2.6731	1.17e-05	0.00032951	DOWN	50.2607	97.4212	-0.95481	0.23035	0.59017	FALSE	sp|Q9ZPY1|PPOX2_ARATH	Pyridoxine/pyridoxamine 5&apos;-phosphate oxidase 2 OS=Arabidopsis thaliana GN=PPOX2 PE=1 SV=2	PPOX2
MD01G1085200	1.32913	0.294309	0.360592	0.732756	34.8561	98.7117	-1.5018	0.0209	0.15317	FALSE	40.0956	110.89	-1.4676	0.0024304	0.023185	DOWN	77.7635	102.931	-0.40452	0.54238	0.88493	FALSE	sp|Q6EU49|WNK4_ORYSJ	Probable serine/threonine-protein kinase WNK4 OS=Oryza sativa subsp. japonica GN=WNK4 PE=2 SV=1	WNK4
MD01G1085500	1.93399	0.18551	0.125392	0	3.83284	25.4313	-2.7301	0.016067	0.12921	FALSE	2.54766	28.5748	-3.4875	0.002261	0.021959	DOWN	0	26.5883	#NAME?	6.74e-05	0.0012227	DOWN	sp|Q9ZPX9|KIC_ARATH	Calcium-binding protein KIC OS=Arabidopsis thaliana GN=KIC PE=1 SV=2	KIC
MD01G1085800	17.2089	2.13292	2.07319	1.40115	115.257	651.685	-2.4993	1.53e-05	0.00094855	DOWN	113.132	731.765	-2.6934	1.28e-10	1.82e-08	DOWN	73.1442	678.547	-3.2136	3.97e-11	4.24e-09	DOWN	sp|Q9LNK1|RABA3_ARATH	Ras-related protein RABA3 OS=Arabidopsis thaliana GN=RABA3 PE=2 SV=1	RABA3
MD01G1086200	12.4926	10.438	11.1423	3.50961	657.767	534.521	0.29933	0.45654	0.7971	FALSE	713.914	600.129	0.25048	0.64538	0.90675	FALSE	213.172	556.375	-1.384	0.0052966	0.042759	DOWN	--	--	0
MD01G1086700	0.640746	0.0532628	0.0258813	0.0349077	4.83251	44.5794	-3.2055	0.028824	0.18613	FALSE	2.49501	50.0089	-4.3251	0.0061107	0.045641	DOWN	3.3127	46.1624	-3.8006	0.013413	0.087337	FALSE	sp|Q8GYY5|RGAP3_ARATH	Rho GTPase-activating protein 3 OS=Arabidopsis thaliana GN=ROPGAP3 PE=2 SV=1	ROPGAP3
MD06G1226600	1.9173	0.0605622	0.129054	0.12126	4.55281	103.4	-4.5053	7.26e-08	1.68e-05	DOWN	9.93371	116.108	-3.547	2.45e-09	2.4e-07	DOWN	9.78724	107.411	-3.4561	5.39e-08	2.48e-06	DOWN	sp|O29470|Y788_ARCFU	Uncharacterized transporter AF_0788 OS=Archaeoglobus fulgidus (strain ATCC 49558 / VC-16 / DSM 4304 / JCM 9628 / NBRC 100126) GN=AF_0788 PE=3 SV=1	AF_0788
MD16G1196500	134.585	38.6494	43.0372	53.7826	1119.9	2562.81	-1.1943	0.023049	0.16196	FALSE	1220.97	2878.14	-1.2371	0.00027648	0.0043362	DOWN	1468.05	2666.84	-0.86123	0.046769	0.21633	FALSE	sp|P05332|YP20_BACLI	Uncharacterized N-acetyltransferase p20 OS=Bacillus licheniformis GN=p20 PE=4 SV=1	p20
MD01G1087200	0.00711115	0.548056	1.25177	18.5633	29.5593	0.236432	6.966	0.028884	0.18626	FALSE	66.0395	0.264852	7.962	0.0002813	0.004395	UP	981.585	0.243378	11.978	0.0020599	0.020281	UP	--	--	0
MD01G1087400	6.48876	4.08499	7.43407	13.9038	377.873	360.068	0.069632	0.92652	1	FALSE	632.569	404.296	0.64581	0.42452	0.74121	FALSE	1124.23	374.886	1.5844	0.00032153	0.0045171	UP	sp|Q9MAM3|KCS1_ARATH	3-ketoacyl-CoA synthase 1 OS=Arabidopsis thaliana GN=KCS1 PE=1 SV=1	KCS1
MD01G1087700	0	0.0353326	0.0341385	0.0848371	6.08503	0	Inf	0.054243	0.2686	FALSE	5.42055	0	Inf	0.064304	0.23624	FALSE	12.2415	0	Inf	0.0010614	0.011912	UP	sp|O81032|GGLO6_ARATH	Probable L-gulonolactone oxidase 6 OS=Arabidopsis thaliana GN=GULLO6 PE=3 SV=1	GULLO6
MD01G1087900	3.72846	7.71073	6.16559	3.39759	1040.84	302.82	1.7812	0.082768	0.33963	FALSE	742.183	340.059	1.126	0.0010562	0.012343	UP	391.493	315.371	0.31194	0.39867	0.77719	FALSE	sp|Q9SF32|IQD1_ARATH	Protein IQ-DOMAIN 1 OS=Arabidopsis thaliana GN=IQD1 PE=1 SV=1	IQD1
MD01G1088400	8.48711	0.899268	2.15693	1.81603	22.9251	158.313	-2.7878	0.00049932	0.012531	DOWN	65.6541	177.851	-1.4377	0.048472	0.19594	FALSE	47.2792	165.304	-1.8058	0.020627	0.12005	FALSE	--	--	0
MD17G1277300	0.0520156	0.0163968	0.277776	0.676194	0.375871	0.756945	-1.01	1	1	FALSE	6.60211	0.851135	2.9555	0.36631	0.68665	FALSE	14.402	0.794082	4.1808	0.004921	0.040353	UP	sp|Q9FZ24|PPR4_ARATH	Pentatricopeptide repeat-containing protein At1g02370, mitochondrial OS=Arabidopsis thaliana GN=At1g02370 PE=2 SV=1	At1g02370
MD01G1088900	3.27681	5.8448	5.14502	2.57293	883.205	309.649	1.5121	0.0082876	0.084779	FALSE	735.92	347.849	1.0811	0.0025464	0.024049	UP	357.8	322.746	0.14875	0.77306	0.99034	FALSE	sp|Q689G6|PRR95_ORYSJ	Two-component response regulator-like PRR95 OS=Oryza sativa subsp. japonica GN=PRR95 PE=2 SV=1	PRR95
MD01G1089100	30.4327	5.73372	17.7221	33.0868	502.801	1855.84	-1.884	0.0014717	0.027019	DOWN	1579.26	2083.71	-0.39991	0.41105	0.72915	FALSE	2920.79	1929.85	0.59787	0.11926	0.40208	FALSE	sp|Q9ZT63|MTP1_ARATH	Metal tolerance protein 1 OS=Arabidopsis thaliana GN=MTP1 PE=1 SV=2	MTP1
MD15G1161300	0.0296853	0.481598	0.92178	4.15769	58.4344	2.2278	4.7131	0.080555	0.33487	FALSE	112.068	2.50508	5.4834	0.062039	0.23071	FALSE	463.282	2.32657	7.6375	6.07e-24	5.8e-21	UP	sp|Q0WPT7|Y2104_ARATH	Uncharacterized methyltransferase At2g41040, chloroplastic OS=Arabidopsis thaliana GN=At2g41040 PE=2 SV=1	At2g41040
MD15G1161400	2.70158	0.543477	0.81458	1.41518	37.5393	118.489	-1.6583	0.0085065	0.086312	FALSE	52.2879	133.078	-1.3477	0.0044945	0.036626	DOWN	89.3107	123.479	-0.46736	0.41196	0.78937	FALSE	sp|Q0WPT7|Y2104_ARATH	Uncharacterized methyltransferase At2g41040, chloroplastic OS=Arabidopsis thaliana GN=At2g41040 PE=2 SV=1	At2g41040
MD08G1181700	8.7469	1.60898	3.17235	2.71473	105.415	414.769	-1.9762	0.0011147	0.022117	DOWN	218.65	465.74	-1.0909	0.0048218	0.038606	DOWN	181.705	431.528	-1.2479	0.0093672	0.066504	FALSE	sp|Q8LBV4|Y1814_ARATH	Uncharacterized methyltransferase At1g78140, chloroplastic OS=Arabidopsis thaliana GN=At1g78140 PE=2 SV=1	At1g78140
MD11G1288000	0.344415	1.42088	2.41232	2.20946	46.322	6.9376	2.7392	0.0017363	0.030319	UP	72.4481	7.79594	3.2162	4.08e-07	1.99e-05	UP	66.5298	7.24299	3.1993	1.13e-05	0.00026942	UP	sp|Q9KG32|Y283_BACHD	Uncharacterized isomerase BH0283 OS=Bacillus halodurans (strain ATCC BAA-125 / DSM 18197 / FERM 7344 / JCM 9153 / C-125) GN=BH0283 PE=3 SV=1	BH0283
MD01G1090900	6.92892	14.6885	12.3181	12.5852	2279.06	726.562	1.6493	0.0011632	0.022847	UP	1868.46	816.055	1.1951	0.13484	0.38126	FALSE	1887.95	758.084	1.3164	0.0061952	0.048508	UP	sp|Q6R0H1|LHY_ARATH	Protein LHY OS=Arabidopsis thaliana GN=LHY PE=1 SV=2	LHY
MD01G1092900	4.86994	1.56313	2.03764	1.45937	212.404	420.384	-0.9849	0.052849	0.2653	FALSE	255.464	472.046	-0.88581	0.022209	0.11531	FALSE	180.985	437.056	-1.272	0.0052246	0.042352	DOWN	sp|Q9LKG8|NAC91_ARATH	NAC domain-containing protein 91 OS=Arabidopsis thaliana GN=NAC091 PE=1 SV=1	NAC091
MD01G1094000	2.09011	0.401064	0.188873	0.448864	38.7106	136.949	-1.8228	0.0032303	0.045477	DOWN	17.6482	153.769	-3.1232	3.1e-09	2.95e-07	DOWN	41.3183	142.496	-1.7861	0.001617	0.016659	DOWN	sp|F4JN35|NTL9_ARATH	Protein NTM1-like 9 OS=Arabidopsis thaliana GN=NTL9 PE=1 SV=1	NTL9
MD01G1094400	3.4715	1.2764	4.11479	6.82442	122.199	226.981	-0.89334	0.15982	0.47933	FALSE	391.848	254.955	0.62005	0.36011	0.68077	FALSE	645.053	236.401	1.4482	0.00047666	0.0062144	UP	sp|B5X570|NAC14_ARATH	NAC domain-containing protein 14 OS=Arabidopsis thaliana GN=NAC014 PE=2 SV=1	NAC014
MD01G1094700	11.2187	2.3661	4.11196	5.29973	218.159	708.745	-1.6999	0.0033737	0.047007	DOWN	381.124	795.964	-1.0624	0.0034128	0.030007	DOWN	485.056	737.265	-0.60403	0.16258	0.48555	FALSE	sp|B5X570|NAC14_ARATH	NAC domain-containing protein 14 OS=Arabidopsis thaliana GN=NAC014 PE=2 SV=1	NAC014
MD01G1095100	4.35457	0.776504	1.96727	2.242	83.8363	331.292	-1.9825	0.0010241	0.020806	DOWN	216.312	372.023	-0.78228	0.053507	0.20932	FALSE	241.978	344.757	-0.5107	0.34638	0.72674	FALSE	sp|B5X570|NAC14_ARATH	NAC domain-containing protein 14 OS=Arabidopsis thaliana GN=NAC014 PE=2 SV=1	NAC014
MD01G1095200	19.8912	55.1285	56.0957	53.0846	5077.95	1210.84	2.0682	7.72e-05	0.0031545	UP	5211.17	1359.93	1.9381	1.57e-07	8.76e-06	UP	4794.62	1261	1.9269	0.027008	0.14593	FALSE	sp|O81916|YC22_ARATH	Uncharacterized calcium-binding protein At1g02270 OS=Arabidopsis thaliana GN=At1g02270 PE=2 SV=2	At1g02270
MD01G1097400	2.0823	9.53199	10.0088	6.27084	543.792	81.5455	2.7374	0.050185	0.25909	FALSE	601.741	91.6534	2.7149	0.00025613	0.0040693	UP	341.401	85.4045	1.9991	0.043976	0.20714	FALSE	sp|Q9LI65|WTR24_ARATH	WAT1-related protein At3g30340 OS=Arabidopsis thaliana GN=At3g30340 PE=2 SV=1	At3g30340
MD01G1097700	0.36869	0.76643	0.828679	0.592516	66.6054	20.6698	1.6881	0.019666	0.14739	FALSE	71.2705	23.2181	1.6181	0.0047703	0.038295	UP	48.846	21.5371	1.1814	0.083475	0.31898	FALSE	--	--	0
MD01G1098300	44.8362	7.98942	15.1665	16.2603	985.92	4011.75	-2.0247	0.00042193	0.011113	DOWN	2004.43	4504.2	-1.1681	0.00057141	0.0075795	DOWN	2097.28	4170.44	-0.99168	0.016897	0.10373	FALSE	sp|Q9FMK9|PPA29_ARATH	Probable inactive purple acid phosphatase 29 OS=Arabidopsis thaliana GN=PAP29 PE=2 SV=1	PAP29
MD01G1099300	0.58998	0.155615	0.0592312	0.0152832	4.92869	13.3345	-1.4359	0.30772	0.66382	FALSE	2.07709	14.9727	-2.8497	0.025221	0.12608	FALSE	0.57227	13.9015	-4.6024	0.0054636	0.043864	DOWN	sp|O49841|RAC2A_ARATH	Ras-related protein RABC2a OS=Arabidopsis thaliana GN=RABC2A PE=1 SV=1	RABC2A
MD01G1100200	1.33266	0.0823859	0.209321	0.106285	5.12148	57.6774	-3.4934	0.00010333	0.0039284	DOWN	12.5529	64.7981	-2.3679	0.00045096	0.0063342	DOWN	6.69641	60.1295	-3.1666	3.42e-05	0.00068746	DOWN	--	--	0
MD01G1100600	9.51382	1.30928	3.84609	14.9683	117.166	644.838	-2.4604	3.62e-05	0.0018032	DOWN	397.119	724.222	-0.86686	0.0078738	0.054817	FALSE	1397.18	671.596	1.0568	0.39946	0.77775	FALSE	sp|Q9SCP2|PLY12_ARATH	Probable pectate lyase 12 OS=Arabidopsis thaliana GN=At3g53190 PE=2 SV=2	At3g53190
MD01G1101300	6.44306	0.299763	0.774998	1.14175	30.6044	489.812	-4.0004	5e-10	3.34e-07	DOWN	79.7426	550.209	-2.7866	1.48e-05	0.00039922	DOWN	122.17	509.724	-2.0608	0.00062535	0.0077662	DOWN	sp|F4I9E1|NFD4_ARATH	Protein NUCLEAR FUSION DEFECTIVE 4 OS=Arabidopsis thaliana GN=NFD4 PE=3 SV=1	NFD4
MD01G1101800	5.59532	1.25107	1.67978	1.76654	134.439	376.46	-1.4855	0.0059513	0.068613	FALSE	167.928	422.691	-1.3318	0.00048503	0.0066952	DOWN	168.222	391.618	-1.2191	0.01118	0.076002	FALSE	sp|Q9SJM1|ACR10_ARATH	ACT domain-containing protein ACR10 OS=Arabidopsis thaliana GN=ACR10 PE=2 SV=1	ACR10
MD01G1102400	7.85886	29.1692	8.18692	15.0844	2490.32	371.806	2.7437	0.28606	0.64123	FALSE	597.511	417.556	0.517	0.41363	0.73143	FALSE	1056.07	387.154	1.4477	0.00083289	0.0098158	UP	--	--	0
MD01G1103500	25.7608	41.9133	38.9227	38.8271	5019.72	1933.41	1.3765	0.012317	0.10999	FALSE	4438.6	2171.45	1.0314	0.0024755	0.023527	UP	4313.04	2011.95	1.1001	0.009246	0.06586	FALSE	sp|Q8VZ40|PUB14_ARATH	U-box domain-containing protein 14 OS=Arabidopsis thaliana GN=PUB14 PE=1 SV=1	PUB14
MD01G1103800	28.2967	14.7274	19.0521	5.12774	132.475	187.348	-0.50001	0.66285	0.92827	FALSE	188.176	210.431	-0.16127	0.7926	0.98147	FALSE	47.5384	195.222	-2.0379	0.00016668	0.0026187	DOWN	--	--	0
MD11G1288100	0.00921547	0.0115752	0.0316652	0.327647	0.408076	0.257096	0.66653	1	1	FALSE	1.47534	0.289081	2.3515	0.77377	0.97501	FALSE	13.122	0.27088	5.5982	0.0018129	0.018243	UP	sp|Q9KG32|Y283_BACHD	Uncharacterized isomerase BH0283 OS=Bacillus halodurans (strain ATCC BAA-125 / DSM 18197 / FERM 7344 / JCM 9153 / C-125) GN=BH0283 PE=3 SV=1	BH0283
MD11G1288400	7.95816	35.7468	48.0938	53.3291	980.551	137.998	2.8289	7.53e-07	0.00010034	UP	1261.31	155.073	3.0239	3.08e-16	1.44e-13	UP	1376.43	143.885	3.2579	2.81e-11	3.09e-09	UP	sp|Q9KG32|Y283_BACHD	Uncharacterized isomerase BH0283 OS=Bacillus halodurans (strain ATCC BAA-125 / DSM 18197 / FERM 7344 / JCM 9153 / C-125) GN=BH0283 PE=3 SV=1	BH0283
MD01G1105200	7.24582	6.6791	10.3517	12.0541	714.22	513.697	0.47545	0.30117	0.65697	FALSE	1118.5	576.972	0.95499	0.0079288	0.055098	FALSE	1264.22	534.628	1.2416	0.0038809	0.033642	UP	sp|Q9LFP7|PIX7_ARATH	Probable serine/threonine-protein kinase PIX7 OS=Arabidopsis thaliana GN=PIX7 PE=1 SV=1	PIX7
MD01G1106300	2.15478	0.3389	0.713516	0.800795	52.9423	256.867	-2.2785	0.00038234	0.010371	DOWN	122.874	288.477	-1.2313	0.0032024	0.028619	DOWN	134.724	267.409	-0.98903	0.055519	0.24297	FALSE	sp|Q94CH6|EXL3_ARATH	GDSL esterase/lipase EXL3 OS=Arabidopsis thaliana GN=EXL3 PE=2 SV=1	EXL3
MD11G1014800	3.98585	1.09829	1.31955	1.49955	130.2	325.885	-1.3236	0.020932	0.15335	FALSE	159.526	365.947	-1.1978	0.0021596	0.021221	DOWN	177.825	338.689	-0.9295	0.039136	0.19088	FALSE	sp|Q8W4I6|BPG2_ARATH	GTP-binding protein BRASSINAZOLE INSENSITIVE PALE GREEN 2, chloroplastic OS=Arabidopsis thaliana GN=BPG2 PE=1 SV=1	BPG2
MD01G1107100	0.0111439	0.279986	1.00873	2.78741	30.0988	0.742602	5.341	0.10682	0.38949	FALSE	111.255	0.835027	7.0578	0.084116	0.28195	FALSE	274.354	0.775524	8.4666	5.71e-13	9.5e-11	UP	sp|Q7XA06|SYT3_ARATH	Synaptotagmin-3 OS=Arabidopsis thaliana GN=SYT3 PE=2 SV=1	SYT3
MD01G1107200	5.16714	1.59726	1.69985	1.84849	199.066	406.528	-1.0301	0.049519	0.25709	FALSE	197.606	456.528	-1.2081	0.0016178	0.017204	DOWN	205.765	423.068	-1.0399	0.031929	0.16474	FALSE	sp|Q7XA06|SYT3_ARATH	Synaptotagmin-3 OS=Arabidopsis thaliana GN=SYT3 PE=2 SV=1	SYT3
MD01G1107500	14.624	28.2925	35.3893	19.4019	2359.81	805.113	1.5514	0.0032431	0.045608	UP	2938.01	904.045	1.7004	5.48e-07	2.55e-05	UP	1558.89	837.467	0.89641	0.057388	0.24837	FALSE	--	--	0
MD01G1108100	0.450659	0.876146	1.83274	1.64169	124.379	41.5917	1.5804	0.011006	0.10233	FALSE	258.595	46.7362	2.4681	2.39e-06	8.95e-05	UP	216.066	43.4751	2.3132	1.46e-05	0.00033564	UP	sp|Q653H7|ARFR_ORYSJ	Auxin response factor 18 OS=Oryza sativa subsp. japonica GN=ARF18 PE=2 SV=1	ARF18
MD01G1108300	11.6642	2.037	3.51641	4.24497	120.968	475.368	-1.9744	0.00063183	0.014782	DOWN	210.584	533.86	-1.3421	0.00033646	0.0050609	DOWN	249.302	494.972	-0.98945	0.027713	0.14874	FALSE	--	--	0
MD01G1108600	16.0788	28.7424	24.3407	16.0343	2257.22	795.71	1.5042	0.0059188	0.068354	FALSE	1818.94	893.395	1.0257	0.002405	0.023019	UP	1162.84	827.156	0.49142	0.28792	0.66406	FALSE	--	--	0
MD01G1108800	3.09759	1.19463	0.976295	1.18027	140.799	240.335	-0.77141	0.16975	0.49493	FALSE	113.075	269.8	-1.2546	0.0018213	0.018766	DOWN	131.807	249.843	-0.9226	0.053499	0.23676	FALSE	sp|O80959|PLP6_ARATH	Patatin-like protein 6 OS=Arabidopsis thaliana GN=PLP6 PE=2 SV=1	PLP6
MD01G1108900	30.0165	96.5979	52.4648	63.7755	9958.82	1805.75	2.4634	0.06235	0.29025	FALSE	4894.54	2028.49	1.2708	0.069826	0.24904	FALSE	5646.71	1880.82	1.586	0.00011407	0.0019099	UP	sp|P57720|AROC_ARATH	Chorismate synthase, chloroplastic OS=Arabidopsis thaliana GN=EMB1144 PE=2 SV=2	EMB1144
MD01G1109800	0.24965	1.10001	1.77189	0.656628	11.2964	1.77099	2.6732	0.059398	0.28247	FALSE	19.5359	1.99135	3.2943	0.0045146	0.036731	UP	6.84041	1.85904	1.8795	0.28468	0.66039	FALSE	--	--	0
MD01G1110100	155.421	171.738	214.495	265.865	14958.2	8819.55	0.76216	0.13065	0.43268	FALSE	18317.7	9907.96	0.88658	0.0071633	0.051362	FALSE	22170.5	9197.74	1.2693	0.0016866	0.017221	UP	sp|Q1PSI9|IDND_VITVI	L-idonate 5-dehydrogenase OS=Vitis vinifera GN=VIT_16s0100g00290 PE=1 SV=2	VIT_16s0100g00290
MD02G1175400	0	0.0273439	0	0.303051	1.50348	0	Inf	0.48356	0.81464	FALSE	0	0	NA	NA	NA	FALSE	16.4039	0	Inf	0.0039463	0.034048	UP	sp|Q9SND9|Y3028_ARATH	Uncharacterized acetyltransferase At3g50280 OS=Arabidopsis thaliana GN=At3g50280 PE=3 SV=1	At3g50280
MD16G1236700	8.81876	1.84198	2.08423	0.885134	158.504	551.168	-1.798	0.00254	0.039048	DOWN	194.178	618.867	-1.6723	1.02e-05	0.00029314	DOWN	79.2882	573.541	-2.8547	1.15e-09	8.64e-08	DOWN	sp|Q8H1E3|PBL17_ARATH	Probable serine/threonine-protein kinase PBL17 OS=Arabidopsis thaliana GN=PBL17 PE=1 SV=1	PBL17
MD03G1116500	0.427261	0.462064	1.60045	2.36356	36.7806	19.9594	0.88187	0.56836	0.87476	FALSE	112.902	22.4332	2.3314	0.18225	0.45911	FALSE	161.338	20.8758	2.9502	0.00037466	0.0051099	UP	sp|Q9SND9|Y3028_ARATH	Uncharacterized acetyltransferase At3g50280 OS=Arabidopsis thaliana GN=At3g50280 PE=3 SV=1	At3g50280
MD01G1116600	0.780334	0.0981857	0.076334	0.185555	4.20915	24.7415	-2.5553	0.023614	0.16446	FALSE	3.43617	27.7854	-3.0155	0.00216	0.021221	DOWN	8.3566	25.7468	-1.6234	0.091526	0.33944	FALSE	sp|O65717|CNGC1_ARATH	Cyclic nucleotide-gated ion channel 1 OS=Arabidopsis thaliana GN=CNGC1 PE=1 SV=1	CNGC1
MD01G1116700	2.94721	0.313776	0.500926	0.564933	55.4835	387.469	-2.8039	5.96e-06	0.00047608	DOWN	94.7551	435.244	-2.1995	6e-08	3.82e-06	DOWN	103.441	403.771	-1.9647	0.00010016	0.0017106	DOWN	sp|Q9LMN7|WAK5_ARATH	Wall-associated receptor kinase 5 OS=Arabidopsis thaliana GN=WAK5 PE=2 SV=1	WAK5
MD07G1214800	8.99603	40.4984	43.4416	13.5455	2673.4	455.195	2.5541	0.26145	0.61359	FALSE	3232.55	511.141	2.6609	4.93e-09	4.47e-07	UP	967.78	473.165	1.0323	0.10557	0.37244	FALSE	sp|Q9SND9|Y3028_ARATH	Uncharacterized acetyltransferase At3g50280 OS=Arabidopsis thaliana GN=At3g50280 PE=3 SV=1	At3g50280
MD01G1117800	11.1388	21.2728	24.6307	22.9153	1981.98	698.055	1.5055	0.0036744	0.0501	FALSE	2344.38	783.802	1.5806	4.36e-06	0.00014502	UP	2099.74	726.852	1.5305	0.00020418	0.0031005	UP	sp|A5HBK6|CFI_PYRCO	Chalcone--flavonone isomerase OS=Pyrus communis GN=CHI PE=2 SV=1	CHI
MD01G1118000	2.10041	13.1958	29.172	36.5883	677.781	72.7696	3.2194	1.18e-06	0.00014122	UP	1521.82	81.7469	4.2185	2.69e-27	1.37e-23	UP	1849.47	75.9347	4.6062	2.78e-23	2.33e-20	UP	sp|A5HBK6|CFI_PYRCO	Chalcone--flavonone isomerase OS=Pyrus communis GN=CHI PE=2 SV=1	CHI
MD01G1118100	23.2182	78.6263	87.0725	60.0768	6498.59	1208.51	2.4269	1.18e-05	0.0007878	UP	6800.68	1356.93	2.3253	9.39e-12	1.67e-09	UP	4535.77	1257.07	1.8513	4.58e-06	0.00012236	UP	sp|A5HBK6|CFI_PYRCO	Chalcone--flavonone isomerase OS=Pyrus communis GN=CHI PE=2 SV=1	CHI
MD01G1118200	20.2221	146.315	293.648	498.904	6366.53	578.144	3.461	0.0065272	0.072861	FALSE	12902.4	649.736	4.3116	3.23e-14	9.27e-12	UP	21058.4	603.292	5.1254	2.4e-21	1.52e-18	UP	sp|A5HBK6|CFI_PYRCO	Chalcone--flavonone isomerase OS=Pyrus communis GN=CHI PE=2 SV=1	CHI
MD01G1118300	2.71357	16.0008	38.0959	43.8997	418.744	48.1253	3.1212	0.0010943	0.021829	UP	1036.55	54.0822	4.2605	3.65e-17	2.07e-14	UP	1139.75	50.2603	4.5032	1.29e-21	8.27e-19	UP	sp|A5HBK6|CFI_PYRCO	Chalcone--flavonone isomerase OS=Pyrus communis GN=CHI PE=2 SV=1	CHI
MD01G1119700	9.5674	16.3749	33.481	35.3008	1148.37	473.386	1.2785	0.12137	0.41632	FALSE	2492.7	531.945	2.2284	1.7e-10	2.32e-08	UP	2574.3	494.191	2.381	1.63e-08	8.65e-07	UP	sp|Q9C942|CSE_ARATH	Caffeoylshikimate esterase OS=Arabidopsis thaliana GN=CSE PE=1 SV=1	CSE
MD01G1121000	30.2235	12.8942	12.1777	1.24068	639.263	1125.68	-0.81632	0.41485	0.76434	FALSE	655.046	1264.56	-0.94896	0.053213	0.20875	FALSE	64.8604	1174.15	-4.1781	1.1e-13	2.13e-11	DOWN	--	--	0
MD01G1121100	7.99668	1.50728	0.773225	0.102434	74.869	304.019	-2.0217	0.016912	0.13371	FALSE	43.584	341.449	-2.9698	5.53e-05	0.0011873	DOWN	5.47408	317.141	-5.8564	1.07e-09	8.09e-08	DOWN	--	--	0
MD01G1121300	1.93166	0.684195	0.596463	0.334646	41.1021	72.6678	-0.8221	0.17978	0.50941	FALSE	33.9208	81.5788	-1.266	0.014002	0.083406	FALSE	17.4583	75.5146	-2.1128	0.0020999	0.020616	DOWN	sp|P82538|PPL1_ARATH	PsbP-like protein 1, chloroplastic OS=Arabidopsis thaliana GN=PPL1 PE=1 SV=1	PPL1
MD15G1079200	3.00308	2.11766	5.86789	18.2426	184.859	159.33	0.2144	0.74443	0.96846	FALSE	507.974	179.033	1.5045	0.51282	0.81325	FALSE	1441.58	166.34	3.1154	0.00078148	0.0093249	UP	sp|Q9SND9|Y3028_ARATH	Uncharacterized acetyltransferase At3g50280 OS=Arabidopsis thaliana GN=At3g50280 PE=3 SV=1	At3g50280
MD01G1122900	21.2416	7.95216	5.10943	0.616316	515.304	972.037	-0.91559	0.11551	0.40551	FALSE	344.592	1091.66	-1.6636	7.31e-06	0.00022458	DOWN	39.1981	1011.75	-4.6899	7.99e-21	4.69e-18	DOWN	sp|O80638|WTR14_ARATH	WAT1-related protein At2g39510 OS=Arabidopsis thaliana GN=At2g39510 PE=2 SV=1	At2g39510
MD01G1124100	9.21736	9.92868	20.8365	39.0624	355.877	224.428	0.66513	0.16849	0.49319	FALSE	761.993	252.036	1.5961	0.0044847	0.036575	UP	1406.89	233.617	2.5903	3.28e-09	2.13e-07	UP	sp|O04469|ECI1_ARATH	Enoyl-CoA delta isomerase 1, peroxisomal OS=Arabidopsis thaliana GN=ECI1 PE=1 SV=1	ECI1
MD01G1124200	34.341	63.5907	76.3437	126.644	2543.9	835.106	1.607	0.021854	0.15733	FALSE	2883.94	938.079	1.6203	0.069057	0.24722	FALSE	4601.87	869.713	2.4036	5.45e-05	0.0010167	UP	sp|O04469|ECI1_ARATH	Enoyl-CoA delta isomerase 1, peroxisomal OS=Arabidopsis thaliana GN=ECI1 PE=1 SV=1	ECI1
MD01G1124500	14.577	2.46047	3.89913	10.2439	180.069	762.489	-2.0822	0.00033873	0.009475	DOWN	309.891	856.306	-1.4664	2.1e-05	0.00053611	DOWN	757.08	793.456	-0.067704	0.91488	1	FALSE	sp|O80644|ACR9_ARATH	ACT domain-containing protein ACR9 OS=Arabidopsis thaliana GN=ACR9 PE=2 SV=1	ACR9
MD01G1125700	3.58117	0.515169	0.931679	1.46018	32.7883	155.566	-2.2463	0.00052952	0.013071	DOWN	60.4026	174.656	-1.5318	0.0007359	0.0093274	DOWN	88.5764	161.791	-0.86914	0.17455	0.50609	FALSE	sp|B9HTK2|CSPLI_POPTR	CASP-like protein 4C2 OS=Populus trichocarpa GN=POPTRDRAFT_822486 PE=3 SV=1	POPTRDRAFT_822486
MD01G1125800	0.147103	7.00822	6.1368	10.9113	751.736	9.32379	6.3332	4.31e-05	0.0020458	UP	609.837	10.4772	5.8631	4.48e-06	0.00014825	UP	1033	9.71121	6.733	7.6e-19	3.59e-16	UP	sp|Q42540|UBC7_ARATH	Ubiquitin-conjugating enzyme E2 7 OS=Arabidopsis thaliana GN=UBC7 PE=1 SV=1	UBC7
MD01G1126000	3.24842	0.935891	0.287946	0.0593412	18.6939	48.2672	-1.3685	0.13348	0.43744	FALSE	6.5148	54.1697	-3.0557	0.00025068	0.0040104	DOWN	1.30202	50.0799	-5.2654	5.12e-07	1.81e-05	DOWN	--	--	0
MD01G1126300	0.54397	0	0.0733828	0.120822	0	30.2529	#NAME?	6.98e-06	0.00053922	DOWN	5.73318	33.9756	-2.5671	0.0038397	0.032702	DOWN	9.16513	31.5136	-1.7817	0.064673	0.26862	FALSE	--	--	0
MD01G1126500	227.175	85.1422	76.0261	219.185	11354.9	17381	-0.61419	0.25201	0.60259	FALSE	8710.55	19523	-1.1643	0.00035213	0.0052481	DOWN	24357.9	18100.6	0.42835	0.25238	0.61796	FALSE	sp|P09189|HSP7C_PETHY	Heat shock cognate 70 kDa protein OS=Petunia hybrida GN=HSP70 PE=2 SV=1	HSP70
MD01G1127300	0.626457	0.316303	0.253503	0.0589476	24.6404	33.8902	-0.45984	0.60423	0.89499	FALSE	20.5351	38.0714	-0.89062	0.20789	0.49597	FALSE	4.66463	35.3596	-2.9223	0.0013778	0.014643	DOWN	sp|P09189|HSP7C_PETHY	Heat shock cognate 70 kDa protein OS=Petunia hybrida GN=HSP70 PE=2 SV=1	HSP70
MD01G1129700	5.83558	1.55611	1.98166	0.774975	81.174	211.395	-1.3808	0.018339	0.14089	FALSE	105.782	237.423	-1.1664	0.011474	0.072187	FALSE	39.4967	220.369	-2.4801	3.39e-06	9.42e-05	DOWN	sp|P09189|HSP7C_PETHY	Heat shock cognate 70 kDa protein OS=Petunia hybrida GN=HSP70 PE=2 SV=1	HSP70
MD01G1129800	0.744473	0.253466	0.220555	0.0738636	21.9855	40.939	-0.89692	0.24164	0.58885	FALSE	18.5209	45.9783	-1.3118	0.04108	0.1754	FALSE	5.57396	42.674	-2.9366	0.0010368	0.011693	DOWN	sp|P09189|HSP7C_PETHY	Heat shock cognate 70 kDa protein OS=Petunia hybrida GN=HSP70 PE=2 SV=1	HSP70
MD01G1130200	1.55182	0.459905	0.502777	0.331447	38.9064	90.3135	-1.2149	0.063426	0.29311	FALSE	43.1931	101.439	-1.2317	0.014367	0.084907	FALSE	27.2965	94.16	-1.7864	0.0040027	0.034459	DOWN	sp|P09189|HSP7C_PETHY	Heat shock cognate 70 kDa protein OS=Petunia hybrida GN=HSP70 PE=2 SV=1	HSP70
MD01G1130400	3.9647	1.52327	1.52813	0.504118	67.0368	122.464	-0.86934	0.22902	0.57427	FALSE	69.5971	137.57	-0.98307	0.097041	0.30927	FALSE	22.2804	127.837	-2.5205	0.00043389	0.005774	DOWN	sp|P09189|HSP7C_PETHY	Heat shock cognate 70 kDa protein OS=Petunia hybrida GN=HSP70 PE=2 SV=1	HSP70
MD01G1130900	0.836059	0.0135623	0.0977565	0	0.408076	19.7873	-5.5996	0.001107	0.022021	DOWN	3.19576	22.2399	-2.7989	0.011606	0.072827	FALSE	0	20.6531	#NAME?	8.4e-05	0.001476	DOWN	sp|Q9LQR0|LBD1_ARATH	LOB domain-containing protein 1 OS=Arabidopsis thaliana GN=LBD1 PE=2 SV=1	LBD1
MD01G1133100	3.79872	1.05715	1.09936	0.715045	92.5657	226.88	-1.2934	0.031438	0.19636	FALSE	97.27	254.842	-1.3895	0.022138	0.11504	FALSE	60.2879	236.766	-1.9735	0.0040338	0.034668	DOWN	sp|P09189|HSP7C_PETHY	Heat shock cognate 70 kDa protein OS=Petunia hybrida GN=HSP70 PE=2 SV=1	HSP70
MD01G1133400	6.8851	2.21911	2.7115	1.08587	199.629	427.529	-1.0987	0.050123	0.25894	FALSE	249.657	480.17	-0.9436	0.064895	0.23769	FALSE	95.0547	445.755	-2.2294	2.14e-05	0.0004618	DOWN	sp|P09189|HSP7C_PETHY	Heat shock cognate 70 kDa protein OS=Petunia hybrida GN=HSP70 PE=2 SV=1	HSP70
MD01G1134100	1.81843	0.363486	0.435936	0.158008	10.9214	42.2652	-1.9523	0.032845	0.20156	FALSE	14.831	47.4627	-1.6782	0.015423	0.089284	FALSE	5.24459	44.014	-3.0691	0.00037189	0.0050806	DOWN	--	--	0
MD01G1134700	53.9585	147.736	187.456	118.1	8547.51	2074.36	2.0428	0.00015975	0.0054711	UP	10923.8	2330.25	2.2289	6.17e-11	9.45e-09	UP	6787.1	2162.01	1.6504	0.005608	0.044806	UP	sp|O48814|BIK1_ARATH	Serine/threonine-protein kinase BIK1 OS=Arabidopsis thaliana GN=BIK1 PE=1 SV=1	BIK1
MD01G1136600	3.86488	0.118745	0.172643	0.235001	8.5136	168.374	-4.3058	5.83e-09	2.24e-06	DOWN	11.2605	189.054	-4.0695	2.73e-11	4.48e-09	DOWN	14.6881	175.335	-3.5774	1.22e-09	8.97e-08	DOWN	sp|Q9LZL3|PCS1L_ARATH	Aspartic proteinase PCS1 OS=Arabidopsis thaliana GN=PCS1 PE=2 SV=1	PCS1
MD01G1137000	0.0267641	0.600118	1.52941	2.0122	8.73904	0.257096	5.0871	0.021964	0.15784	FALSE	22.0137	0.289081	6.2508	2.08e-05	0.00053224	UP	27.6374	0.27088	6.6728	0.00039498	0.0053497	UP	sp|Q53MB8|TLPH_ORYSJ	Thaumatin-like protein OS=Oryza sativa subsp. japonica GN=Os11g0706600 PE=2 SV=1	Os11g0706600
MD01G1137100	0.930167	15.9207	15.4668	6.95863	384.293	14.0783	4.7707	5.92e-13	1.08e-09	UP	359.098	15.8163	4.5049	5.53e-06	0.00017706	UP	152.843	14.684	3.3797	0.014793	0.094191	FALSE	--	--	0
MD01G1137700	12.1979	29.3646	19.3309	19.5763	3214.48	863.326	1.8966	0.00042007	0.011081	UP	2062.34	969.576	1.0889	0.0012628	0.014229	UP	2031.57	900	1.1746	0.0042762	0.036214	UP	sp|Q9M2S4|LRKS4_ARATH	L-type lectin-domain containing receptor kinase S.4 OS=Arabidopsis thaliana GN=LECRKS4 PE=2 SV=1	LECRKS4
MD01G1139100	67.3399	113.312	118.852	90.7292	7193.68	2754.46	1.385	0.0080831	0.083251	FALSE	7383.63	3093.79	1.255	0.0002138	0.0035541	UP	5429	2869.22	0.92003	0.021816	0.12473	FALSE	sp|Q9LHT0|TRNHF_ARATH	Tropinone reductase homolog At5g06060 OS=Arabidopsis thaliana GN=At5g06060 PE=2 SV=1	At5g06060
MD01G1139200	38.8948	464.362	182.892	166.292	45515.7	2155.98	4.3999	0.054003	0.26784	FALSE	15920.9	2421.27	2.7171	0.0056957	0.043444	UP	13806.7	2245.18	2.6205	0.0022567	0.021751	UP	sp|P49598|P2C37_ARATH	Protein phosphatase 2C 37 OS=Arabidopsis thaliana GN=PP2CA PE=1 SV=1	PP2CA
MD01G1139500	36.2658	96.7962	71.5869	64.0654	9581.7	2210.56	2.1159	0.00042681	0.011158	UP	6710.17	2482.76	1.4344	0.00053555	0.0072334	UP	5790.28	2301.37	1.3311	0.0015925	0.016485	UP	sp|O22286|BPM3_ARATH	BTB/POZ and MATH domain-containing protein 3 OS=Arabidopsis thaliana GN=BPM3 PE=1 SV=1	BPM3
MD01G1140100	25.7434	5.98786	4.36391	8.82791	309.12	918.359	-1.5709	0.010362	0.09858	FALSE	232.189	1031.54	-2.1514	0.00041949	0.0059725	DOWN	459.193	954.891	-1.0562	0.04955	0.22457	FALSE	sp|Q8W487|YB95_ARATH	Uncharacterized protein At2g39795, mitochondrial OS=Arabidopsis thaliana GN=At2g39795 PE=1 SV=1	At2g39795
MD17G1197100	0.0110343	0.0639351	0.316614	0.755537	3.98415	0.514192	2.9539	0.26438	0.61692	FALSE	21.7663	0.578162	5.2345	6.82e-05	0.0014066	UP	49.9187	0.54176	6.5258	8.56e-10	6.67e-08	UP	sp|Q9SND9|Y3028_ARATH	Uncharacterized acetyltransferase At3g50280 OS=Arabidopsis thaliana GN=At3g50280 PE=3 SV=1	At3g50280
MD01G1140700	3.11663	0.731016	1.1171	1.68245	116.001	313.848	-1.4359	0.0092268	0.091209	FALSE	166.837	352.422	-1.0789	0.0047273	0.038059	DOWN	249.856	326.398	-0.38554	0.32435	0.70381	FALSE	sp|B3H5K9|NEDD1_ARATH	Protein NEDD1 OS=Arabidopsis thaliana GN=NEDD1 PE=2 SV=1	NEDD1
MD01G1141700	17.5042	122.481	197.378	143.585	7038.64	663.981	3.4061	8.84e-07	0.00011264	UP	11495.4	746.329	3.9451	1.25e-11	2.19e-09	UP	7787.84	696.262	3.4835	2.76e-13	5e-11	UP	--	--	0
MD01G1142200	49.3036	13.335	16.3044	32.8532	1394.18	3346.76	-1.2633	0.016525	0.13155	FALSE	1686.29	3758.8	-1.1564	0.000327	0.0049423	DOWN	3236.2	3483.97	-0.10643	0.83239	1	FALSE	--	--	0
MD01G1142500	7.10552	0.695009	1.5711	2.59096	55.9493	432.541	-2.9506	2.26e-06	0.00023048	DOWN	137.359	485.637	-1.8219	1.27e-05	0.00035437	DOWN	218.933	449.39	-1.0375	0.18326	0.5202	FALSE	sp|F4JTB3|DTX35_ARATH	Protein DETOXIFICATION 35 OS=Arabidopsis thaliana GN=DTX35 PE=2 SV=1	DTX35
MD14G1230300	1.60423	1.99185	3.19627	5.72517	163.027	90.8385	0.84374	0.21454	0.55562	FALSE	282.261	102.097	1.4671	0.037489	0.1654	FALSE	480.657	94.9523	2.3397	3.5e-07	1.3e-05	UP	sp|A6H195|MURG_FLAPJ	UDP-N-acetylglucosamine--N-acetylmuramyl-(pentapeptide) pyrophosphoryl-undecaprenol N-acetylglucosamine transferase OS=Flavobacterium psychrophilum (strain JIP02/86 / ATCC 49511) GN=murG PE=3 SV=1	murG
MD14G1080600	25.5074	6.45621	9.97439	17.6699	593.576	1521.79	-1.3583	0.012976	0.11363	FALSE	892.479	1709.38	-0.93758	0.0047783	0.038341	DOWN	1546.26	1584.53	-0.035274	0.90066	1	FALSE	sp|P0CD61|GPT_DICDI	UDP-N-acetylglucosamine--dolichyl-phosphate N-acetylglucosaminephosphotransferase OS=Dictyostelium discoideum GN=alg7 PE=3 SV=1	alg7
MD04G1029200	8.39801	12.8486	15.9243	14.0228	1048.39	434.313	1.2714	0.024331	0.1673	FALSE	1232.77	487.622	1.3381	0.00011577	0.0021727	UP	1040.69	451.927	1.2034	0.0022656	0.021816	UP	sp|Q9LXV0|U92A1_ARATH	UDP-glycosyltransferase 92A1 OS=Arabidopsis thaliana GN=UGT92A1 PE=2 SV=1	UGT92A1
MD01G1144200	35.8277	13.7977	2.7172	0.644897	595.836	942.365	-0.66137	0.16708	0.49118	FALSE	106.829	1057.91	-3.3078	1.58e-06	6.29e-05	DOWN	24.1826	980.542	-5.3415	3.2e-11	3.5e-09	DOWN	sp|P05478|HSP16_SOYBN	18.5 kDa class I heat shock protein OS=Glycine max GN=HSP18.5-C PE=3 SV=1	HSP18.5-C
MD01G1144300	309.928	121.713	54.9097	32.0987	2886.35	4546.03	-0.65536	0.16654	0.49015	FALSE	1179.66	5103.01	-2.113	0.00078563	0.0097933	DOWN	672.174	4728.39	-2.8144	5.7e-05	0.0010574	DOWN	sp|P19037|HS181_ARATH	18.1 kDa class I heat shock protein OS=Arabidopsis thaliana GN=HSP18.1 PE=1 SV=1	HSP18.1
MD01G1144400	570.457	362.616	255.623	174.425	18898.4	18554.7	0.026485	0.87393	1	FALSE	12376.4	20832.9	-0.75127	0.023301	0.11923	FALSE	8220.54	19303.5	-1.2316	0.0023623	0.022593	DOWN	sp|P05478|HSP16_SOYBN	18.5 kDa class I heat shock protein OS=Glycine max GN=HSP18.5-C PE=3 SV=1	HSP18.5-C
MD02G1083100	6.14854	1.2592	1.95893	1.66656	82.7178	291.032	-1.8149	0.0039867	0.05275	FALSE	135.722	326.812	-1.2678	0.0015737	0.016815	DOWN	111.628	302.531	-1.4384	0.0034593	0.030773	DOWN	sp|Q9LTA3|U91C1_ARATH	UDP-glycosyltransferase 91C1 OS=Arabidopsis thaliana GN=UGT91C1 PE=2 SV=1	UGT91C1
MD01G1146000	9.5794	1.25987	2.20901	2.43275	92.8073	506.789	-2.4491	4.68e-05	0.0021938	DOWN	169.968	569.183	-1.7436	5.97e-06	0.00018896	DOWN	181.982	527.465	-1.5353	0.0010374	0.011693	DOWN	sp|Q9FFJ8|LIMYB_ARATH	L10-interacting MYB domain-containing protein OS=Arabidopsis thaliana GN=LIMYB PE=1 SV=1	LIMYB
MD01G1146100	3.53275	5.20691	6.96802	3.16528	196.844	88.1293	1.1594	0.047574	0.2513	FALSE	257.466	98.9917	1.379	0.00040751	0.005853	UP	116.873	91.9585	0.34588	0.56481	0.89563	FALSE	sp|O04195|Y2992_ARATH	Uncharacterized protein At2g39920 OS=Arabidopsis thaliana GN=At2g39920 PE=2 SV=2	At2g39920
MD01G1146200	4.92789	7.57091	10.1919	3.34369	331.714	145.995	1.184	0.030381	0.19232	FALSE	442.758	163.965	1.4331	0.00040382	0.0058119	UP	145.758	152.304	-0.063379	0.87987	1	FALSE	sp|O04195|Y2992_ARATH	Uncharacterized protein At2g39920 OS=Arabidopsis thaliana GN=At2g39920 PE=2 SV=2	At2g39920
MD02G1083300	3.02764	0.371602	0.971487	0.55475	22.8095	139.976	-2.6175	0.00020997	0.0066646	DOWN	66.3788	157.161	-1.2435	0.0054974	0.042376	DOWN	36.6315	145.414	-1.989	0.00030922	0.0043771	DOWN	sp|Q9LTA3|U91C1_ARATH	UDP-glycosyltransferase 91C1 OS=Arabidopsis thaliana GN=UGT91C1 PE=2 SV=1	UGT91C1
MD01G1147000	45.2551	77.4329	76.2118	58.9502	12291.7	4530.7	1.4399	0.010143	0.097242	FALSE	11427.6	5089.15	1.167	0.00029762	0.0046057	UP	8634.12	4721.98	0.87066	0.029028	0.15387	FALSE	sp|O04197|COI1_ARATH	Coronatine-insensitive protein 1 OS=Arabidopsis thaliana GN=COI1 PE=1 SV=1	COI1
MD01G1147200	77.926	146.463	111.856	74.0578	21654.7	7144.36	1.5998	0.0045606	0.057659	FALSE	15466.6	8022.15	0.94709	0.0035785	0.031036	UP	9909.13	7438.04	0.41383	0.29983	0.67657	FALSE	--	--	0
MD01G1147300	7.07119	0.790662	2.01199	2.71477	24.1167	153.848	-2.6734	9.44e-05	0.0036787	DOWN	64.7324	172.801	-1.4166	0.0012497	0.014127	DOWN	83.8589	160.245	-0.93424	0.088761	0.33285	FALSE	sp|P58684|SPCS2_ARATH	Probable signal peptidase complex subunit 2 OS=Arabidopsis thaliana GN=At2g39960 PE=2 SV=1	At2g39960
MD01G1147400	8.70509	0.963511	1.91893	2.98957	22.8735	152.812	-2.74	9.33e-05	0.0036387	DOWN	48.8698	171.657	-1.8125	8.89e-05	0.0017517	DOWN	75.3514	159.353	-1.0805	0.04008	0.19412	FALSE	sp|P58684|SPCS2_ARATH	Probable signal peptidase complex subunit 2 OS=Arabidopsis thaliana GN=At2g39960 PE=2 SV=1	At2g39960
MD01G1147600	9.8104	3.36086	3.03955	1.19084	231.655	480.388	-1.0522	0.081722	0.33738	FALSE	224.636	539.472	-1.264	0.003226	0.028755	DOWN	83.3902	499.215	-2.5817	1e-07	4.28e-06	DOWN	sp|O04200|PXN_ARATH	Peroxisomal nicotinamide adenine dinucleotide carrier OS=Arabidopsis thaliana GN=PXN PE=1 SV=1	PXN
MD01G1148000	2.34837	0.139392	0.191073	0.175862	3.60828	46.0378	-3.6734	0.0002375	0.0072614	DOWN	5.35064	51.683	-3.2719	2e-05	0.00051631	DOWN	5.00071	47.8284	-3.2577	9.92e-05	0.0016999	DOWN	sp|Q8H1D2|WOX5_ARATH	WUSCHEL-related homeobox 5 OS=Arabidopsis thaliana GN=WOX5 PE=2 SV=1	WOX5
MD02G1083600	0.476182	0.777186	1.39794	1.22089	51.7816	22.1744	1.2235	0.16285	0.48449	FALSE	97.7402	24.8857	1.9736	0.00020696	0.0034589	UP	86.0735	23.0331	1.9019	0.035603	0.17817	FALSE	sp|Q9LTA3|U91C1_ARATH	UDP-glycosyltransferase 91C1 OS=Arabidopsis thaliana GN=UGT91C1 PE=2 SV=1	UGT91C1
MD01G1149000	23.1156	30.5862	40.8209	32.4934	2512.25	1249.88	1.0072	0.047115	0.24973	FALSE	3331.6	1403.48	1.2472	0.00020524	0.0034343	UP	2600.57	1300.25	1	0.019856	0.11665	FALSE	sp|Q9FFK1|SYP31_ARATH	Syntaxin-31 OS=Arabidopsis thaliana GN=SYP31 PE=1 SV=1	SYP31
MD02G1084000	54.7588	163.814	218.06	171.922	14737.8	3272.42	2.1711	0.0023692	0.037109	UP	20019.4	3675.4	2.4454	8.75e-07	3.81e-05	UP	15225.2	3406.65	2.16	0.00039063	0.0052961	UP	sp|Q9LTA3|U91C1_ARATH	UDP-glycosyltransferase 91C1 OS=Arabidopsis thaliana GN=UGT91C1 PE=2 SV=1	UGT91C1
MD01G1149600	1.37898	0.0995304	0.347228	0.434887	6.49658	64.1311	-3.3033	0.00015534	0.0053528	DOWN	23.3029	72.0298	-1.6281	0.0058269	0.044164	DOWN	29.1554	66.7929	-1.1959	0.060977	0.25836	FALSE	--	--	0
MD01G1149700	3.62798	0.874655	0.800335	0.802023	97.7357	246.135	-1.3325	0.010136	0.097196	FALSE	79.1863	276.376	-1.8033	1.77e-05	0.00046697	DOWN	76.8255	256.215	-1.7377	0.00059643	0.0074703	DOWN	sp|Q9FFK3|EGY2_ARATH	Probable zinc metalloprotease EGY2, chloroplastic OS=Arabidopsis thaliana GN=EGY2 PE=2 SV=1	EGY2
MD01G1150100	0.348864	0.068124	0.0868774	0.043966	12.1515	40.8364	-1.7487	0.031079	0.19501	FALSE	14.2372	45.8744	-1.688	0.020726	0.10966	FALSE	7.45496	42.5497	-2.5129	0.0022156	0.021445	DOWN	sp|C0LGP4|Y3475_ARATH	Probable LRR receptor-like serine/threonine-protein kinase At3g47570 OS=Arabidopsis thaliana GN=At3g47570 PE=2 SV=1	At3g47570
MD01G1150900	1.33627	0.209228	0.349056	0.509549	20.2769	83.166	-2.0362	0.0029212	0.042619	DOWN	31.0894	93.4086	-1.5871	0.0049375	0.039301	DOWN	45.1456	86.5844	-0.93952	0.12869	0.42209	FALSE	sp|C0LGP4|Y3475_ARATH	Probable LRR receptor-like serine/threonine-protein kinase At3g47570 OS=Arabidopsis thaliana GN=At3g47570 PE=2 SV=1	At3g47570
MD01G1151000	1.17419	0.112859	0.198263	0.373877	9.06022	59.2458	-2.7091	0.00086742	0.018557	DOWN	14.2442	66.5459	-2.224	0.00065488	0.0084878	DOWN	26.9729	61.6524	-1.1926	0.074874	0.2964	FALSE	sp|Q9SD62|Y3471_ARATH	Putative receptor-like protein kinase At3g47110 OS=Arabidopsis thaliana GN=At3g47110 PE=3 SV=1	At3g47110
MD01G1152300	7.59083	9.51543	11.1568	13.1108	564.166	285.585	0.9822	0.087084	0.34915	FALSE	634.991	320.726	0.98539	0.008216	0.056543	FALSE	734.019	297.307	1.3039	0.0036952	0.0324	UP	--	--	0
MD01G1152500	19.3978	6.12929	6.71446	5.73021	426.953	931.401	-1.1253	0.056443	0.27456	FALSE	482.178	1046.01	-1.1173	0.0016439	0.017401	DOWN	389.487	969.707	-1.316	0.0036571	0.032158	DOWN	sp|Q9SRM5|CPR49_ARATH	GDSL esterase/lipase CPRD49 OS=Arabidopsis thaliana GN=CPRD49 PE=2 SV=1	CPRD49
MD01G1152900	3.45108	0.215732	0.73264	3.19441	23.6945	243.74	-3.3627	0.00016313	0.0055495	DOWN	79.6745	273.921	-1.7816	0.014181	0.084129	FALSE	332.867	254.595	0.38674	0.5517	0.88905	FALSE	sp|Q8GV43|PLCD6_ARATH	Phosphoinositide phospholipase C 6 OS=Arabidopsis thaliana GN=PLC6 PE=2 SV=2	PLC6
MD01G1153000	75.3523	55.3553	55.7558	13.0231	5664.51	5525.84	0.035757	0.89494	1	FALSE	5985.09	6205.76	-0.052234	0.97923	1	FALSE	1355.05	5763.12	-2.0885	0.002635	0.024645	DOWN	sp|Q39033|PLCD2_ARATH	Phosphoinositide phospholipase C 2 OS=Arabidopsis thaliana GN=PLC2 PE=1 SV=1	PLC2
MD01G1153100	1.41208	3.69541	4.34068	5.82397	523.427	115.921	2.1748	0.10049	0.37605	FALSE	579.304	130.211	2.1535	0.34581	0.66411	FALSE	719.309	120.665	2.5756	0.00019736	0.003007	UP	sp|Q9LY50|ACCR3_ARATH	Putative serine/threonine-protein kinase-like protein CCR3 OS=Arabidopsis thaliana GN=CCR3 PE=2 SV=1	CCR3
MD01G1153200	7.8968	5.48189	10.5105	21.6353	437.763	398.47	0.13568	0.71889	0.9617	FALSE	829.485	447.551	0.89016	0.35212	0.67163	FALSE	1629.82	414.868	1.974	4.75e-05	0.00090448	UP	sp|Q9GZU7|CTDS1_HUMAN	Carboxy-terminal domain RNA polymerase II polypeptide A small phosphatase 1 OS=Homo sapiens GN=CTDSP1 PE=1 SV=1	CTDSP1
MD01G1153300	9.55986	30.8436	27.6572	28.5342	4518.65	868.362	2.3795	2.98e-05	0.0015807	UP	3858.68	975.269	1.9842	5.83e-06	0.00018516	UP	3796.31	902.947	2.0719	8.67e-06	0.00021316	UP	sp|Q54BC9|DYRK2_DICDI	Probable serine/threonine-protein kinase dyrk2 OS=Dictyostelium discoideum GN=dyrk2 PE=3 SV=1	dyrk2
MD01G1154100	8.25155	0.438599	0.684522	1.10977	38.2286	530.032	-3.7934	2.15e-09	1.09e-06	DOWN	64.7543	595.154	-3.2002	2.03e-15	7.65e-13	DOWN	102.117	551.051	-2.432	1.45e-07	5.97e-06	DOWN	sp|P48619|FAD3C_RICCO	Omega-3 fatty acid desaturase, chloroplastic OS=Ricinus communis GN=FAD7A-1 PE=2 SV=1	FAD7A-1
MD01G1154200	1.24199	0.170146	0.341269	0.810716	33.9278	164.268	-2.2755	0.00055239	0.013497	DOWN	66.0576	184.544	-1.4822	0.00096245	0.011489	DOWN	154.438	171.339	-0.14982	0.85316	1	FALSE	sp|Q9Y2K9|STB5L_HUMAN	Syntaxin-binding protein 5-like OS=Homo sapiens GN=STXBP5L PE=1 SV=2	STXBP5L
MD08G1200700	4.7922	4.25526	8.3534	14.7853	611.901	476.803	0.35991	0.4184	0.76717	FALSE	1234.44	535.565	1.2047	0.00041597	0.0059373	UP	2183.15	496.278	2.1372	6.36e-07	2.2e-05	UP	sp|Q9LTA3|U91C1_ARATH	UDP-glycosyltransferase 91C1 OS=Arabidopsis thaliana GN=UGT91C1 PE=2 SV=1	UGT91C1
MD17G1036200	0.14625	0.140782	0.198238	2.06226	11.3375	7.11957	0.67124	0.59189	0.88823	FALSE	15.5437	8.00475	0.9574	0.58194	0.86486	FALSE	154.528	7.41975	4.3804	0.0017018	0.017333	UP	sp|Q9ZVX4|U90A1_ARATH	UDP-glycosyltransferase 90A1 OS=Arabidopsis thaliana GN=UGT90A1 PE=2 SV=1	UGT90A1
MD01G1157100	2.10108	1.5844	2.52387	8.13614	130.962	114.57	0.19293	0.69543	0.94974	FALSE	210.81	128.652	0.71247	0.14683	0.40213	FALSE	646.316	119.32	2.4374	3.63e-08	1.75e-06	UP	sp|Q8C8R3|ANK2_MOUSE	Ankyrin-2 OS=Mus musculus GN=Ank2 PE=1 SV=2	Ank2
MD01G1157900	2.02936	2.79909	15.2052	42.6571	84.0641	44.6296	0.91349	0.32526	0.68054	FALSE	490.885	50.1112	3.2922	2.33e-07	1.24e-05	UP	1372.05	46.4478	4.8846	1.86e-08	9.74e-07	UP	sp|Q8LBW3|LBD12_ARATH	LOB domain-containing protein 12 OS=Arabidopsis thaliana GN=LBD12 PE=2 SV=2	LBD12
MD01G1158000	34.2485	42.3762	58.598	81.7512	5585.04	2808.08	0.99198	0.06836	0.30628	FALSE	7319.98	3153.49	1.2149	0.00047128	0.0065586	UP	9832.94	2919.48	1.7519	1.96e-05	0.00043031	UP	sp|F4JZC2|ENAS1_ARATH	Cytosolic endo-beta-N-acetylglucosaminidase 1 OS=Arabidopsis thaliana GN=ENGASE1 PE=1 SV=1	ENGASE1
MD01G1158500	19.7009	165.581	266.512	160.789	4881.34	416.674	3.5503	0.018441	0.14148	FALSE	8662.14	468.019	4.2101	3.6e-09	3.39e-07	UP	5191.16	433.415	3.5822	0.020525	0.11957	FALSE	sp|O80920|PYL4_ARATH	Abscisic acid receptor PYL4 OS=Arabidopsis thaliana GN=PYL4 PE=1 SV=1	PYL4
MD01G1158600	4.89437	16.6398	12.6138	18.0325	1800.31	312.561	2.526	0.04885	0.25501	FALSE	1261.77	350.933	1.8462	0.040538	0.17401	FALSE	1713.42	324.948	2.3986	1.96e-07	7.76e-06	UP	sp|O82132|DRE2A_ARATH	Dehydration-responsive element-binding protein 2A OS=Arabidopsis thaliana GN=DREB2A PE=1 SV=1	DREB2A
MD01G1158900	0.346656	0.0903685	0.0100409	0.0327411	9.34035	25.2103	-1.4325	0.141	0.45012	FALSE	1.11473	28.3164	-4.6669	6.45e-05	0.0013457	DOWN	3.5556	26.2947	-2.8866	0.0044791	0.037615	DOWN	sp|Q9SIY8|LAC5_ARATH	Laccase-5 OS=Arabidopsis thaliana GN=LAC5 PE=2 SV=1	LAC5
MD01G1159400	0.795037	0.0513741	0.00371651	0.0378093	5.59397	62.9229	-3.4916	0.00055997	0.013617	DOWN	0.491781	70.6664	-7.1669	2.74e-07	1.41e-05	DOWN	4.47834	65.6589	-3.874	0.00018702	0.0028728	DOWN	sp|Q9SIY8|LAC5_ARATH	Laccase-5 OS=Arabidopsis thaliana GN=LAC5 PE=2 SV=1	LAC5
MD01G1160300	250.709	772.883	425.179	298.894	31609.1	6253.81	2.3375	0.001879	0.031863	UP	16263.6	7022.64	1.2116	0.0034838	0.030441	UP	10906.8	6511.92	0.74408	0.18923	0.5296	FALSE	sp|Q39096|ERD15_ARATH	Protein EARLY RESPONSIVE TO DEHYDRATION 15 OS=Arabidopsis thaliana GN=ERD15 PE=1 SV=1	ERD15
MD16G1054300	10.9108	0.806765	1.46512	1.02814	54.4092	533.479	-3.2935	4.64e-07	6.81e-05	DOWN	101.785	599.259	-2.5577	3.64e-05	0.00083975	DOWN	72.1693	555.004	-2.943	1.13e-06	3.63e-05	DOWN	sp|Q9LZD8|U89A2_ARATH	UDP-glycosyltransferase 89A2 OS=Arabidopsis thaliana GN=UGT89A2 PE=2 SV=1	UGT89A2
MD08G1219000	12.6642	6.00431	9.47409	2.831	553.234	839.768	-0.6021	0.38886	0.74111	FALSE	913.457	942.941	-0.045832	0.97255	1	FALSE	262.607	873.604	-1.7341	0.00016579	0.0026091	DOWN	sp|D3UAG4|U88F4_MALDO	UDP-glycosyltransferase 88F4 OS=Malus domestica GN=UGT88F4 PE=2 SV=1	UGT88F4
MD01G1162000	0.0738513	2.53803	2.07576	1.7928	88.9599	1.47086	5.9184	0.0041446	0.054225	FALSE	68.2512	1.65395	5.3669	0.063017	0.23295	FALSE	54.4669	1.53249	5.1514	3.71e-05	0.00073718	UP	--	--	0
MD01G1162300	3.99263	0.916465	1.2644	1.71711	49.7042	151.903	-1.6117	0.01502	0.12429	FALSE	70.7459	170.573	-1.2697	0.0043779	0.036001	DOWN	92.7214	158.067	-0.76957	0.16604	0.49146	FALSE	--	--	0
MD01G1162400	4.05126	0.0350049	0.0552245	0.041947	2.36156	181.687	-6.2656	0.0011652	0.022864	DOWN	3.67336	203.79	-5.7938	0.0019447	0.01967	DOWN	2.55414	188.056	-6.2022	0.0015208	0.015871	DOWN	sp|A7NY33|PER4_VITVI	Peroxidase 4 OS=Vitis vinifera GN=GSVIVT00023967001 PE=1 SV=1	GSVIVT00023967001
MD01G1163200	1.0268	0.323261	0.137376	0.0167029	27.8225	66.9395	-1.2666	0.11358	0.40243	FALSE	12.2167	75.1576	-2.6211	5.14e-05	0.0011227	DOWN	1.50271	69.6006	-5.5335	2.13e-09	1.48e-07	DOWN	sp|Q5XVC7|Y2048_ARATH	WEB family protein At2g40480 OS=Arabidopsis thaliana GN=At2g40480 PE=2 SV=1	At2g40480
MD01G1163900	1.23787	8.73504	9.75135	19.8024	864.757	72.6099	3.5741	0.031978	0.19828	FALSE	917.661	81.6149	3.4911	0.14552	0.4	FALSE	1759.1	75.8875	4.5348	1.98e-05	0.00043483	UP	sp|Q9SRK7|AZG1_ARATH	Adenine/guanine permease AZG1 OS=Arabidopsis thaliana GN=AZG1 PE=2 SV=1	AZG1
MD01G1165600	1.2693	0.0168086	0.0355043	0.0744804	2.04038	121.359	-5.8943	8.09e-11	7.85e-08	DOWN	4.73866	136.292	-4.8461	8.24e-13	1.79e-10	DOWN	10.2885	126.131	-3.6158	1.05e-08	5.92e-07	DOWN	sp|Q9FL28|FLS2_ARATH	LRR receptor-like serine/threonine-protein kinase FLS2 OS=Arabidopsis thaliana GN=FLS2 PE=1 SV=1	FLS2
MD01G1167300	14.9358	2.15512	4.31418	13.5898	88.9757	454.018	-2.3513	9.96e-05	0.0038037	DOWN	193.448	509.88	-1.3982	0.00015907	0.0028143	DOWN	584.758	472.184	0.30849	0.50848	0.86286	FALSE	sp|Q8VZW3|CFI3_ARATH	Probable chalcone--flavonone isomerase 3 OS=Arabidopsis thaliana GN=CHI3 PE=1 SV=1	CHI3
MD01G1167600	44.2811	8.26488	9.10636	20.7977	298.865	1116.56	-1.9015	0.0093399	0.091994	FALSE	341.023	1253.09	-1.8776	0.0049973	0.039654	DOWN	735.337	1159.44	-0.65696	0.49492	0.85277	FALSE	--	--	0
MD01G1167900	0.485571	0.0641694	0.0750294	0.0394715	10.5778	62.7365	-2.5683	0.0021272	0.03452	DOWN	14.2081	70.4465	-2.3098	0.00021713	0.0036033	DOWN	6.94707	65.2858	-3.2323	3.73e-05	0.00074004	DOWN	sp|Q9LY03|IRK_ARATH	Probable LRR receptor-like serine/threonine-protein kinase IRK OS=Arabidopsis thaliana GN=IRK PE=1 SV=1	IRK
MD08G1218900	49.2034	140.973	161.116	155.893	10603.8	2410.1	2.1374	6.73e-05	0.0028739	UP	11815.7	2707.51	2.1257	3.61e-10	4.4e-08	UP	11228.3	2513.82	2.1592	1.64e-07	6.61e-06	UP	sp|D3UAG7|U88F3_PYRCO	UDP-glycosyltransferase 88F3 OS=Pyrus communis GN=UGT88F3 PE=2 SV=1	UGT88F3
MD08G1219100	13.7641	5.01531	7.7149	2.06734	368.522	728.931	-0.98403	0.10032	0.37586	FALSE	596.944	818.396	-0.4552	0.24322	0.54444	FALSE	154.472	757.685	-2.2943	5.49e-07	1.92e-05	DOWN	sp|D3UAG7|U88F3_PYRCO	UDP-glycosyltransferase 88F3 OS=Pyrus communis GN=UGT88F3 PE=2 SV=1	UGT88F3
MD01G1169200	5.40954	5.91471	13.7376	49.3569	152.152	82.567	0.88187	0.31889	0.67463	FALSE	334.092	92.771	1.8485	0.3152	0.63217	FALSE	1140.74	86.1459	3.727	0.00066879	0.0082115	UP	--	--	0
MD01G1170600	0.677583	0.299433	0.18768	0.0678811	20.5849	27.7129	-0.42898	0.45315	0.7943	FALSE	11.4373	31.1264	-1.4444	0.075567	0.26167	FALSE	3.89937	28.912	-2.8904	0.0049596	0.040613	DOWN	sp|Q9C9Y8|Y3868_ARATH	Probable inactive receptor kinase At3g08680 OS=Arabidopsis thaliana GN=At3g08680 PE=1 SV=1	At3g08680
MD01G1170800	1.71439	0.794051	0.819247	0.219605	44.9393	64.656	-0.52481	0.42549	0.77152	FALSE	44.5936	72.5985	-0.7031	0.2905	0.60288	FALSE	11.9208	67.3324	-2.4978	0.00034525	0.0047832	DOWN	--	--	0
MD01G1170900	6.1534	1.60351	2.42441	0.987013	174.457	512.596	-1.555	0.098956	0.37359	FALSE	295.847	575.658	-0.96036	0.11995	0.35481	FALSE	119.371	534.572	-2.1629	0.0012791	0.013826	DOWN	sp|Q9LVM0|Y5830_ARATH	Probable inactive receptor kinase At5g58300 OS=Arabidopsis thaliana GN=At5g58300 PE=2 SV=1	At5g58300
MD01G1172000	19.3303	15.1721	7.98952	4.73507	1139.14	854.041	0.41556	0.82848	1	FALSE	541.707	958.972	-0.82397	0.014361	0.084902	FALSE	300.323	888.909	-1.5655	0.00033673	0.0046923	DOWN	--	--	0
MD01G1172500	0.629816	0.0330575	0.00376721	0.0117184	4.00315	43.7958	-3.4516	0.00021438	0.0067573	DOWN	0.350372	49.1799	-7.133	1.54e-09	1.62e-07	DOWN	1.12343	45.5589	-5.3417	6.37e-07	2.2e-05	DOWN	sp|Q93Z79|C14A1_ARATH	Cytochrome P450 714A1 OS=Arabidopsis thaliana GN=CYP714A1 PE=2 SV=1	CYP714A1
MD01G1172700	7.73769	3.08382	3.52915	2.01722	620.958	1039.28	-0.74302	0.17338	0.50006	FALSE	703.58	1166.91	-0.72991	0.044074	0.18371	FALSE	390.29	1081.62	-1.4706	0.00060358	0.0075392	DOWN	--	--	0
MD01G1173000	9.55255	0.311494	1.29244	1.03075	9.44929	204.748	-4.4375	0.00018415	0.0060672	DOWN	39.6069	230.132	-2.5386	0.0099102	0.064619	FALSE	30.4067	213.76	-2.8135	0.011972	0.080136	FALSE	sp|Q9ZVR7|PSKR1_ARATH	Phytosulfokine receptor 1 OS=Arabidopsis thaliana GN=PSKR1 PE=1 SV=4	PSKR1
MD01G1173400	15.833	3.20881	5.29598	2.99757	490.855	1842.12	-1.908	0.0020528	0.033613	DOWN	890.983	2068.18	-1.2149	0.001561	0.016718	DOWN	481.828	1915.8	-1.9914	2.59e-05	0.00054269	DOWN	sp|Q9FZD9|DUF3_ARATH	DUF724 domain-containing protein 3 OS=Arabidopsis thaliana GN=DUF3 PE=1 SV=1	DUF3
MD01G1173600	12.3039	24.4868	19.3648	26.6489	444.411	136.12	1.707	0.014206	0.1203	FALSE	328.523	152.872	1.1037	0.0057728	0.043851	UP	442.826	141.635	1.6446	0.077815	0.30451	FALSE	--	--	0
MD01G1174400	2.4087	2.98499	7.70154	14.698	291.884	156.801	0.89646	0.074224	0.32143	FALSE	797.25	176.088	2.1787	0.11586	0.34694	FALSE	1415.25	163.113	3.1171	2.13e-05	0.00045969	UP	sp|Q38946|DHE2_ARATH	Glutamate dehydrogenase 2 OS=Arabidopsis thaliana GN=GDH2 PE=1 SV=1	GDH2
MD01G1210600	116.958	155.621	198.47	433.894	12001	5669.08	1.082	0.047169	0.24989	FALSE	14616	6366.87	1.1989	0.005447	0.042123	UP	31113.2	5900.94	2.3985	1.14e-08	6.39e-07	UP	sp|Q9LK73|U88A1_ARATH	UDP-glycosyltransferase 88A1 OS=Arabidopsis thaliana GN=UGT88A1 PE=2 SV=1	UGT88A1
MD01G1177300	12.2047	19.8913	18.3701	22.2229	2382.62	896.863	1.4096	0.016051	0.12911	FALSE	2074.66	1007.17	1.0426	0.027151	0.13278	FALSE	2434.05	933.416	1.3828	0.0014403	0.015173	UP	sp|Q9FKG3|PFKA4_ARATH	ATP-dependent 6-phosphofructokinase 4, chloroplastic OS=Arabidopsis thaliana GN=PFK4 PE=1 SV=1	PFK4
MD01G1177400	3.36796	0.583947	1.28733	2.31289	47.1526	180.926	-1.94	0.001952	0.032537	DOWN	103.22	203.223	-0.97734	0.021439	0.11247	FALSE	178.363	188.59	-0.080432	0.9846	1	FALSE	sp|Q08448|YO059_YEAST	Putative lipase YOR059C OS=Saccharomyces cerevisiae (strain ATCC 204508 / S288c) GN=YOR059C PE=1 SV=1	YOR059C
MD01G1178200	16.9204	25.7655	27.1201	32.0168	2239.51	936.17	1.2583	0.017808	0.13824	FALSE	2309.99	1051.45	1.1355	0.017201	0.096102	FALSE	2616.13	974.142	1.4252	0.00069762	0.0085002	UP	sp|Q3E875|RGAPX_ARATH	Uncharacterized Rho GTPase-activating protein At5g61530 OS=Arabidopsis thaliana GN=At5g61530 PE=1 SV=2	At5g61530
MD01G1178300	0.509518	0.727914	1.7046	4.44614	59.6305	27.4737	1.118	0.10495	0.38534	FALSE	138.156	30.8608	2.1625	0.0085974	0.058301	FALSE	352.281	28.6048	3.6224	1.35e-07	5.62e-06	UP	sp|Q07423|HEX6_RICCO	Hexose carrier protein HEX6 OS=Ricinus communis GN=HEX6 PE=2 SV=1	HEX6
MD01G1178400	10.7891	12.6852	15.6044	14.9974	985.174	550.873	0.83866	0.089058	0.35369	FALSE	1209.57	618.65	0.9673	0.0062766	0.0465	UP	1127.53	573.307	0.97578	0.02219	0.1263	FALSE	sp|P40783|QOR_SALTY	Quinone oxidoreductase OS=Salmonella typhimurium (strain LT2 / SGSC1412 / ATCC 700720) GN=qor PE=3 SV=2	qor
MD01G1178900	3.69888	5.69158	9.87112	10.333	176.068	81.3061	1.1147	0.163	0.48468	FALSE	326.842	91.3304	1.8394	3.12e-06	0.00011172	UP	335.545	84.6821	1.9864	2.59e-05	0.00054352	UP	sp|Q9MA83|RLP30_ARATH	Receptor like protein 30 OS=Arabidopsis thaliana GN=RLP30 PE=2 SV=1	RLP30
MD01G1179000	3.73331	0.784966	1.35218	0.662881	61.4462	217.403	-1.823	0.0049398	0.060773	FALSE	116.158	244.099	-1.0714	0.0086554	0.058573	FALSE	55.3841	226.105	-2.0294	5.95e-05	0.001099	DOWN	--	--	0
MD01G1179100	1.16998	0.210998	0.529947	0.0576442	12.3058	49.6578	-2.0127	0.019494	0.14666	FALSE	32.4336	55.7543	-0.78159	0.23104	0.52882	FALSE	3.3703	51.6482	-3.9378	1.06e-05	0.00025424	DOWN	sp|Q9FZD9|DUF3_ARATH	DUF724 domain-containing protein 3 OS=Arabidopsis thaliana GN=DUF3 PE=1 SV=1	DUF3
MD01G1180000	0.191596	0.102008	0.412536	1.27489	6.51559	7.41508	-0.18657	0.88421	1	FALSE	23.7019	8.3339	1.5079	0.078504	0.26854	FALSE	72.632	7.73802	3.2306	3.35e-06	9.32e-05	UP	sp|Q07423|HEX6_RICCO	Hexose carrier protein HEX6 OS=Ricinus communis GN=HEX6 PE=2 SV=1	HEX6
MD01G1181200	20.2006	34.8896	33.6151	30.255	6860.76	2465.63	1.4764	0.0083827	0.08543	FALSE	6206.3	2769.09	1.1643	0.00050945	0.0069615	UP	5454.06	2566.16	1.0877	0.0093735	0.066514	FALSE	sp|Q8NIW7|BBP_NEUCR	Branchpoint-bridging protein OS=Neurospora crassa (strain ATCC 24698 / 74-OR23-1A / CBS 708.71 / DSM 1257 / FGSC 987) GN=bbp-1 PE=3 SV=1	bbp-1
MD01G1181600	1.20343	0.219753	0.0889418	0	5.87366	24.5795	-2.0651	0.057064	0.27602	FALSE	2.47381	27.5913	-3.4794	0.00099993	0.011818	DOWN	0	25.5281	#NAME?	1.03e-05	0.00024739	DOWN	sp|O82528|RL15_PETHY	60S ribosomal protein L15 OS=Petunia hybrida GN=RPL15 PE=2 SV=1	RPL15
MD01G1183500	0	0.0345699	0.00552663	0	2.68274	0	Inf	0.31683	0.67262	FALSE	0.371577	0	Inf	0.96342	1	FALSE	0	0	NA	NA	NA	NA	--	--	0
MD01G1184200	4.57653	0.493087	0.834313	1.12119	6.80848	47.7314	-2.8095	0.0024635	0.038132	DOWN	12.743	53.5952	-2.0724	0.0021031	0.020792	DOWN	16.8495	49.6551	-1.5592	0.029437	0.15532	FALSE	--	--	0
MD07G1280800	57.1356	87.7214	107.181	279.146	7045.57	2925.22	1.2682	0.01446	0.12146	FALSE	8368.54	3285.24	1.349	0.051808	0.20509	FALSE	21291	3047.49	2.8045	8.01e-06	0.00019888	UP	sp|Q9LK73|U88A1_ARATH	UDP-glycosyltransferase 88A1 OS=Arabidopsis thaliana GN=UGT88A1 PE=2 SV=1	UGT88A1
MD01G1184400	4.46249	0.320881	0.891824	1.29471	46.2222	451.314	-3.2875	8.94e-08	1.97e-05	DOWN	129.871	506.794	-1.9643	6.15e-07	2.81e-05	DOWN	187.185	469.393	-1.3263	0.0038881	0.03368	DOWN	sp|Q9FFZ1|PPH_ARATH	Pheophytinase, chloroplastic OS=Arabidopsis thaliana GN=PPH PE=1 SV=1	PPH
MD01G1184500	15.1667	1.90811	3.81097	4.30829	73.0166	404.018	-2.4681	5.61e-05	0.0025157	DOWN	148.359	453.724	-1.6127	3.47e-05	0.00080699	DOWN	169.489	420.266	-1.3101	0.0021318	0.020845	DOWN	sp|F4KDA6|LPA2_ARATH	Protein LOW PSII ACCUMULATION 2, chloroplastic OS=Arabidopsis thaliana GN=LPA2 PE=1 SV=1	LPA2
MD01G1184600	48.038	8.19391	8.52528	6.17158	519.932	2299.38	-2.1448	0.0037791	0.051033	FALSE	585.185	2581.81	-2.1414	0.00049678	0.0068134	DOWN	403.66	2395.35	-2.569	0.00078069	0.0093182	DOWN	sp|Q9FHM9|EXOL3_ARATH	Protein EXORDIUM-like 3 OS=Arabidopsis thaliana GN=EXL3 PE=2 SV=1	EXL3
MD01G1184900	1.74315	0.242379	0.442783	0.235433	26.4601	146.318	-2.4672	0.0010058	0.020579	DOWN	53.437	164.334	-1.6207	0.0067101	0.048825	DOWN	27.4665	152.603	-2.474	0.00057389	0.0072464	DOWN	sp|Q8RY65|NIK2_ARATH	Protein NSP-INTERACTING KINASE 2 OS=Arabidopsis thaliana GN=NIK2 PE=1 SV=1	NIK2
MD01G1185300	5.97456	0.889544	1.54882	0.826104	131.302	662.213	-2.3344	0.00010023	0.0038214	DOWN	247.067	743.72	-1.5899	2.86e-05	0.00069352	DOWN	126.657	689.6	-2.4448	2.83e-07	1.08e-05	DOWN	--	--	0
MD01G1186200	6.54551	2.18851	1.15449	0.262076	179.208	343.051	-0.93679	0.076244	0.32526	FALSE	90.7871	385.243	-2.0852	4.95e-06	0.00016154	DOWN	19.1051	357.378	-4.2254	9.1e-15	2.15e-12	DOWN	--	--	0
MD01G1070400	0.130798	15.9062	6.01183	39.012	1693.6	7.4547	7.8277	0.048703	0.25467	FALSE	566.591	8.38249	6.0788	0.10906	0.33351	FALSE	3365.95	7.79236	8.7547	3.96e-13	6.78e-11	UP	sp|Q9MB95|1A11_PRUMU	1-aminocyclopropane-1-carboxylate synthase 1 OS=Prunus mume GN=ACS1 PE=2 SV=1	ACS1
MD01G1186500	2.02621	2.15492	2.92002	4.49011	312.502	183.842	0.7654	0.21297	0.55356	FALSE	392.965	206.469	0.92848	0.011821	0.07393	FALSE	598.596	191.349	1.6454	0.00018038	0.0027886	UP	sp|Q39214|RPM1_ARATH	Disease resistance protein RPM1 OS=Arabidopsis thaliana GN=RPM1 PE=1 SV=1	RPM1
MD06G1090600	0.850542	12.3849	35.1391	82.7213	1356.25	61.1632	4.4708	0.060863	0.28638	FALSE	4099.63	68.7564	5.8979	0.070736	0.25123	FALSE	8867.91	64.1761	7.1104	1.38e-10	1.32e-08	UP	sp|P31531|1A1C_SOYBN	1-aminocyclopropane-1-carboxylate synthase OS=Glycine max GN=ACS1 PE=2 SV=1	ACS1
MD01G1187400	7.32416	1.17996	2.05993	2.99677	128.434	574.6	-2.1615	0.00038069	0.01035	DOWN	239.25	645.191	-1.4312	9.5e-05	0.0018467	DOWN	339.922	597.849	-0.81458	0.062219	0.26181	FALSE	sp|Q8VYR9|KEA5_ARATH	K(+) efflux antiporter 5 OS=Arabidopsis thaliana GN=KEA5 PE=2 SV=1	KEA5
MD07G1281000	0.45347	1.08773	0.701705	1.43006	37.8693	9.51939	1.9921	0.033681	0.20472	FALSE	21.9501	10.685	1.0386	0.23302	0.53122	FALSE	44.3149	9.89332	2.1633	0.0052593	0.042526	UP	sp|Q9LK73|U88A1_ARATH	UDP-glycosyltransferase 88A1 OS=Arabidopsis thaliana GN=UGT88A1 PE=2 SV=1	UGT88A1
MD01G1187700	25.1991	8.8367	8.48481	8.84267	363.655	700.647	-0.94611	0.11168	0.39883	FALSE	353.252	786.914	-1.1555	0.0013241	0.014707	DOWN	368.123	729.612	-0.98694	0.010148	0.070512	FALSE	sp|Q6NPM5|ATS3B_ARATH	Embryo-specific protein ATS3B OS=Arabidopsis thaliana GN=ATS3B PE=1 SV=1	ATS3B
MD01G1188100	9.4094	3.87585	2.79888	2.05215	200.665	313.725	-0.64471	0.28748	0.64262	FALSE	140.905	352.243	-1.3218	0.0073169	0.052033	FALSE	99.5606	325.649	-1.7097	0.002152	0.021003	DOWN	--	--	0
MD01G1190900	2.08958	0.285655	0.577406	0.563574	23.4343	106.603	-2.1856	0.0012458	0.023948	DOWN	42.8963	119.75	-1.4811	0.0025136	0.023806	DOWN	40.8171	110.969	-1.4429	0.013728	0.08887	FALSE	sp|Q40392|TMVRN_NICGU	TMV resistance protein N OS=Nicotiana glutinosa GN=N PE=1 SV=1	N
MD11G1062300	1.13878	1.53549	1.59121	3.6136	153.536	79.0341	0.95803	0.077934	0.3288	FALSE	165.11	88.7685	0.89531	0.033337	0.15316	FALSE	359.349	82.293	2.1265	0.00031262	0.0044116	UP	sp|O64733|U87A2_ARATH	UDP-glycosyltransferase 87A2 OS=Arabidopsis thaliana GN=UGT87A2 PE=1 SV=1	UGT87A2
MD11G1061800	3.3537	2.15179	4.88311	22.8778	195.326	199.077	-0.027443	0.86846	1	FALSE	440.505	223.714	0.9775	0.21595	0.50749	FALSE	1957.27	207.812	3.2355	0.00040528	0.0054622	UP	sp|O64732|U87A1_ARATH	UDP-glycosyltransferase 87A1 OS=Arabidopsis thaliana GN=UGT87A1 PE=2 SV=1	UGT87A1
MD01G1193100	10.4839	2.17298	2.76217	3.668	109.835	354.537	-1.6906	0.0043754	0.056199	FALSE	137.662	398.183	-1.5323	0.00020844	0.0034807	DOWN	178.579	369.602	-1.0494	0.023566	0.13207	FALSE	--	--	0
MD01G1193200	11.8279	2.40501	4.14493	2.55985	333.685	1193.65	-1.8388	0.0016709	0.029428	DOWN	605.084	1339.99	-1.147	0.013952	0.083236	FALSE	361.769	1239.58	-1.7767	0.00028187	0.0040598	DOWN	--	--	0
MD01G1195200	114.621	16.0854	11.9739	29.0477	1374.51	7083.85	-2.3656	0.00026631	0.0078876	DOWN	1102.18	7957.44	-2.8519	3.1e-06	0.00011123	DOWN	2664.09	7392.27	-1.4724	0.0043649	0.036821	DOWN	sp|Q9FJ95|DHSO_ARATH	Sorbitol dehydrogenase OS=Arabidopsis thaliana GN=SDH PE=1 SV=1	SDH
MD01G1195700	22.1107	35.3013	43.0944	29.2173	4855.89	2003.63	1.2771	0.014576	0.12205	FALSE	5886.28	2249.61	1.3877	2.93e-05	0.00070393	UP	3874.11	2084.48	0.89418	0.13327	0.43111	FALSE	sp|Q7XIM0|CDPKH_ORYSJ	Calcium-dependent protein kinase 17 OS=Oryza sativa subsp. japonica GN=CPK17 PE=2 SV=1	CPK17
MD01G1195900	3.05045	0.740616	0.896696	1.86062	71.0432	186.717	-1.3941	0.015767	0.12805	FALSE	79.7277	209.608	-1.3945	0.0034758	0.030394	DOWN	162.831	194.133	-0.25367	0.68412	0.95721	FALSE	sp|A2A559|PGAP3_MOUSE	Post-GPI attachment to proteins factor 3 OS=Mus musculus GN=Pgap3 PE=2 SV=1	Pgap3
MD01G1196100	7.19159	5.35545	3.74415	0.785921	208.912	162.244	0.36473	0.87232	1	FALSE	118.737	182.176	-0.61756	0.52608	0.82326	FALSE	26.2565	169.083	-2.687	0.00019598	0.0029882	DOWN	sp|Q9SYS6|DRE1C_ARATH	Dehydration-responsive element-binding protein 1C OS=Arabidopsis thaliana GN=DREB1C PE=2 SV=2	DREB1C
MD01G1196200	40.9343	2.83725	2.09441	1.5845	56.5117	504.016	-3.1568	1.31e-07	2.65e-05	DOWN	41.4444	566.31	-3.7723	2.28e-09	2.26e-07	DOWN	26.8904	525.919	-4.2897	3.25e-09	2.12e-07	DOWN	--	--	0
MD01G1197200	1.61985	0.799501	0.781527	0.259326	42.2901	54.8999	-0.37648	0.64677	0.92051	FALSE	39.2485	61.6832	-0.65224	0.28657	0.59848	FALSE	12.6506	57.2214	-2.1774	0.0025715	0.024157	DOWN	sp|Q9LEX0|P2A13_ARATH	F-box protein PP2-A13 OS=Arabidopsis thaliana GN=PP2A13 PE=1 SV=1	PP2A13
MD01G1197600	3.77821	0.610745	1.07968	0.949942	96.2885	438.663	-2.1877	0.00029679	0.0085846	DOWN	182.162	492.546	-1.435	0.00022014	0.0036447	DOWN	154.007	456.53	-1.5677	0.0012399	0.013466	DOWN	sp|Q9SZL8|FRS5_ARATH	Protein FAR1-RELATED SEQUENCE 5 OS=Arabidopsis thaliana GN=FRS5 PE=2 SV=1	FRS5
MD01G1198000	0.876171	0.120537	0.0443254	0.101345	8.1064	41.6001	-2.3595	0.0093975	0.092277	FALSE	3.14941	46.7068	-3.8905	4.16e-06	0.00013918	DOWN	6.88269	43.2708	-2.6523	0.0014638	0.015374	DOWN	sp|Q9CAN1|RBL2_ARATH	RHOMBOID-like protein 2 OS=Arabidopsis thaliana GN=RBL2 PE=1 SV=1	RBL2
MD01G1199700	1.17251	11.293	22.6684	8.91487	635.1	48.2692	3.7178	0.026045	0.17441	FALSE	1414.95	54.2346	4.7054	2.62e-09	2.56e-07	UP	530.273	50.4396	3.3941	7.26e-06	0.00018276	UP	sp|Q9FFA7|RUP2_ARATH	WD repeat-containing protein RUP2 OS=Arabidopsis thaliana GN=RUP2 PE=1 SV=1	RUP2
MD01G1199900	38.0948	55.8353	54.88	39.7954	4095.98	1800.1	1.1861	0.025317	0.17142	FALSE	3924.91	2021.54	0.95721	0.0038241	0.032611	UP	2773.1	1873	0.56615	0.19114	0.53206	FALSE	sp|Q8GXS3|CFIS2_ARATH	Pre-mRNA cleavage factor Im 25 kDa subunit 2 OS=Arabidopsis thaliana GN=CFIS2 PE=1 SV=1	CFIS2
MD01G1200400	24.4524	9.36112	8.22518	6.41301	561.925	957.586	-0.76902	0.13435	0.43926	FALSE	471.976	1074.99	-1.1875	0.0018997	0.01933	DOWN	359.086	995.329	-1.4708	0.00074356	0.0089661	DOWN	sp|P93788|REMO_SOLTU	Remorin OS=Solanum tuberosum PE=1 SV=1	1
MD11G1062200	7.85386	5.38591	10.2787	15.2324	518.361	504.098	0.040255	0.81988	0.99906	FALSE	1000.21	566.304	0.82065	0.023312	0.11927	FALSE	1424.06	524.835	1.4401	0.00041355	0.0055428	UP	sp|O64732|U87A1_ARATH	UDP-glycosyltransferase 87A1 OS=Arabidopsis thaliana GN=UGT87A1 PE=2 SV=1	UGT87A1
MD01G1201300	1.13394	0.242233	0.0199877	0.0306685	8.80389	29.7376	-1.7561	0.065818	0.29944	FALSE	0.700745	33.4071	-5.5751	3.33e-06	0.00011668	DOWN	1.09463	31.0406	-4.8256	7.01e-05	0.0012645	DOWN	sp|Q84K70|HIP31_ARATH	Heavy metal-associated isoprenylated plant protein 31 OS=Arabidopsis thaliana GN=HIPP31 PE=2 SV=1	HIPP31
MD01G1201900	0.478273	1.53154	51.2243	199.641	71.801	14.1622	2.342	0.37837	0.73197	FALSE	2399.12	15.9217	7.2354	0.0081601	0.056281	FALSE	8973.12	14.8009	9.2438	2.09e-09	1.46e-07	UP	--	--	0
MD01G1202600	0.052984	1.75661	38.9256	71.6922	145.53	2.75634	5.7224	0.11725	0.40873	FALSE	3389.46	3.09935	10.095	0.04038	0.17361	FALSE	5793.72	2.88689	10.971	1.29e-06	4.11e-05	UP	sp|Q2QYH7|C14C2_ORYSJ	Cytochrome P450 714C2 OS=Oryza sativa subsp. japonica GN=CYP714C2 PE=2 SV=1	CYP714C2
MD01G1205100	3.50187	0.642345	0.966783	1.25069	101.359	374.447	-1.8853	0.0010999	0.02191	DOWN	153.781	420.499	-1.4512	0.00017541	0.0030413	DOWN	192.739	389.81	-1.0161	0.026302	0.14319	FALSE	--	--	0
MD11G1062500	1.56344	3.32356	5.2189	18.5901	227.755	66.0828	1.7851	0.22954	0.57493	FALSE	349.875	74.2923	2.2356	0.15702	0.4187	FALSE	1161.51	68.9989	4.0733	2.15e-10	1.94e-08	UP	sp|O64732|U87A1_ARATH	UDP-glycosyltransferase 87A1 OS=Arabidopsis thaliana GN=UGT87A1 PE=2 SV=1	UGT87A1
MD01G1206300	87.4201	12.4973	24.6135	35.3341	1157.48	5724.14	-2.3061	5.12e-05	0.0023532	DOWN	2370.99	6427.76	-1.4388	2.72e-05	0.00066687	DOWN	3344.27	5948.84	-0.83092	0.043845	0.20666	FALSE	sp|F4JTB3|DTX35_ARATH	Protein DETOXIFICATION 35 OS=Arabidopsis thaliana GN=DTX35 PE=2 SV=1	DTX35
MD01G1206700	8.55077	0.422577	2.21251	9.22703	38.5952	584.911	-3.9217	5.21e-05	0.0023858	DOWN	221.441	656.858	-1.5687	0.031112	0.146	FALSE	879.953	607.286	0.53505	0.44889	0.82061	FALSE	sp|F4JTB3|DTX35_ARATH	Protein DETOXIFICATION 35 OS=Arabidopsis thaliana GN=DTX35 PE=2 SV=1	DTX35
MD01G1206800	23.9154	75.7931	56.3373	56.2225	8582.49	1579.05	2.4423	0.11	0.39594	FALSE	5655.85	1773.02	1.6735	1.36e-06	5.6e-05	UP	5462.94	1642.18	1.7341	0.015427	0.096938	FALSE	sp|Q9FYR7|SCL8_ARATH	Scarecrow-like protein 8 OS=Arabidopsis thaliana GN=SCL8 PE=2 SV=1	SCL8
MD01G1207300	1.68649	0.186812	0.381426	0.323188	14.6899	96.7282	-2.7191	0.00031937	0.0090683	DOWN	31.6505	108.611	-1.7789	0.00059423	0.0078312	DOWN	26.7299	100.575	-1.9117	0.0012129	0.013257	DOWN	sp|O31634|YJCL_BACSU	Uncharacterized membrane protein YjcL OS=Bacillus subtilis (strain 168) GN=yjcL PE=4 SV=1	yjcL
MD01G1207400	12.1925	1.90058	5.15484	5.73183	156.157	755.839	-2.2751	0.00011134	0.0041516	DOWN	459.626	848.631	-0.88468	0.059727	0.22516	FALSE	499.32	786.247	-0.65502	0.25617	0.62335	FALSE	sp|O31634|YJCL_BACSU	Uncharacterized membrane protein YjcL OS=Bacillus subtilis (strain 168) GN=yjcL PE=4 SV=1	yjcL
MD01G1207700	3.69099	0.360888	0.73115	0.996123	40.8928	315.33	-2.9469	4.25e-06	0.00037448	DOWN	90.4522	354.127	-1.969	2.16e-06	8.19e-05	DOWN	119.111	328.532	-1.4637	0.008636	0.062632	FALSE	sp|Q9FLW0|Y5241_ARATH	Probable receptor-like protein kinase At5g24010 OS=Arabidopsis thaliana GN=At5g24010 PE=1 SV=1	At5g24010
MD01G1208300	15.1461	4.75768	3.95364	7.54328	369.403	700.519	-0.92323	0.050947	0.26114	FALSE	273.876	786.999	-1.5228	0.00022798	0.0037426	DOWN	515.136	730.611	-0.50415	0.19467	0.53719	FALSE	sp|O49814|BCH2_CAPAN	Beta-carotene hydroxylase 2, chloroplastic (Fragment) OS=Capsicum annuum GN=CA2 PE=2 SV=1	CA2
MD01G1208700	143.679	24.7264	14.6167	64.0346	3641.08	12435.6	-1.772	0.0002903	0.0084388	DOWN	1889.47	13965	-2.8858	1.78e-10	2.4e-08	DOWN	8333.82	12957.7	-0.63675	0.091272	0.33897	FALSE	sp|P51819|HSP83_IPONI	Heat shock protein 83 OS=Ipomoea nil GN=HSP83A PE=2 SV=1	HSP83A
MD01G1208900	11.0931	13.5914	16.9052	12.2725	1010.94	544.909	0.8916	0.092067	0.35989	FALSE	1256.03	611.838	1.0376	0.0030635	0.027676	UP	878.311	566.746	0.63203	0.12452	0.41341	FALSE	sp|Q8H0W3|RVE6_ARATH	Protein REVEILLE 6 OS=Arabidopsis thaliana GN=RVE6 PE=2 SV=1	RVE6
MD01G1209000	48.2649	4.71978	14.5638	20.1938	205.528	1292.89	-2.6532	1.23e-06	0.00014516	DOWN	571.265	1452.27	-1.3461	0.0028473	0.026158	DOWN	782.685	1345.84	-0.782	0.13034	0.42559	FALSE	sp|O03982|HIP39_ARATH	Heavy metal-associated isoprenylated plant protein 39 OS=Arabidopsis thaliana GN=HIPP39 PE=2 SV=1	HIPP39
MD01G1209200	34.6739	11.3598	10.432	19.8095	421.81	864.787	-1.0358	0.084061	0.34279	FALSE	389.58	971.041	-1.3176	0.00013708	0.0024967	DOWN	733.581	898.596	-0.29272	0.40841	0.78639	FALSE	sp|O03982|HIP39_ARATH	Heavy metal-associated isoprenylated plant protein 39 OS=Arabidopsis thaliana GN=HIPP39 PE=2 SV=1	HIPP39
MD01G1209500	5.2367	1.25905	2.05196	1.4273	105.617	304.419	-1.5272	0.014455	0.12145	FALSE	175.381	341.809	-0.96269	0.017262	0.096361	FALSE	117.711	316.661	-1.4277	0.0033107	0.029722	DOWN	sp|Q0WMN5|Y3913_ARATH	Uncharacterized protein At3g49140 OS=Arabidopsis thaliana GN=At3g49140 PE=1 SV=2	At3g49140
MD11G1062600	0	0.0102861	0.0100694	0	1.13733	0	Inf	0.72733	0.96183	FALSE	0.983562	0	Inf	0.76681	0.97188	FALSE	0	0	NA	NA	NA	NA	sp|O64732|U87A1_ARATH	UDP-glycosyltransferase 87A1 OS=Arabidopsis thaliana GN=UGT87A1 PE=2 SV=1	UGT87A1
MD01G1211000	2.26854	0.679192	0.343971	0.672066	71.6787	138.839	-0.95379	0.076998	0.32672	FALSE	32.1657	155.951	-2.2775	1.82e-06	7.12e-05	DOWN	60.5268	144.675	-1.2572	0.012028	0.08038	FALSE	sp|Q9FLX4|MAKR5_ARATH	Probable membrane-associated kinase regulator 5 OS=Arabidopsis thaliana GN=MAKR5 PE=2 SV=1	MAKR5
MD01G1211100	0.784676	0.057323	0.0558631	0.0546364	3.17772	30.2839	-3.2525	0.0026705	0.040354	DOWN	3.26961	34.0172	-3.3791	0.00038802	0.0056547	DOWN	3.17632	31.6208	-3.3154	0.00073869	0.0089239	DOWN	sp|O82352|RTNLE_ARATH	Reticulon-like protein B5 OS=Arabidopsis thaliana GN=RTNLB5 PE=1 SV=1	RTNLB5
MD01G1211600	0.59151	0.984037	2.63461	2.14151	59.599	26.84	1.1509	0.37586	0.72952	FALSE	180.323	30.1379	2.5809	3.38e-08	2.32e-06	UP	141.367	27.9626	2.3379	0.00036967	0.005057	UP	sp|Q84JK8|MAKR6_ARATH	Probable membrane-associated kinase regulator 6 OS=Arabidopsis thaliana GN=MAKR6 PE=2 SV=1	MAKR6
MD01G1212900	0.0747275	0.866419	2.18703	6.98155	41.8498	2.31387	4.1768	2.06e-05	0.0011856	UP	107.649	2.60173	5.3707	0.0061113	0.045641	UP	312.552	2.43792	7.0023	0.00033826	0.0047056	UP	sp|P29024|CHIA_PHAAN	Acidic endochitinase OS=Phaseolus angularis PE=2 SV=1	2
MD01G1213000	0.684043	11.2823	16.6984	22.0588	312.173	11.2979	4.7882	0.00021512	0.0067671	UP	440.473	12.7035	5.1158	0.0051321	0.040408	UP	557.519	11.9002	5.55	0.00067498	0.0082652	UP	sp|Q9FLW9|PKP2_ARATH	Plastidial pyruvate kinase 2 OS=Arabidopsis thaliana GN=PKP2 PE=1 SV=1	PKP2
MD01G1213100	227.692	1548.39	2740.42	3406.72	83954.6	7991.32	3.3931	0.00028416	0.0083017	UP	152665	8984.13	4.0868	0.00493	0.039264	UP	177522	8378.66	4.4051	2.71e-07	1.04e-05	UP	sp|P36908|CHIA_CICAR	Acidic endochitinase OS=Cicer arietinum PE=2 SV=1	2
MD01G1213300	75.1426	68.3748	151.223	546.104	3577.6	2420.17	0.56389	0.46675	0.80357	FALSE	7511.79	2719.7	1.4657	0.20248	0.48904	FALSE	25731.7	2532.47	3.3449	0.0043377	0.036621	UP	sp|P29024|CHIA_PHAAN	Acidic endochitinase OS=Phaseolus angularis PE=2 SV=1	2
MD11G1062700	20.2712	48.7126	94.4829	152.634	3394.74	972.226	1.8039	0.049781	0.25779	FALSE	6950.47	1093.04	2.6688	1.32e-09	1.41e-07	UP	10688.1	1017.21	3.3933	2.79e-13	5.03e-11	UP	sp|O64732|U87A1_ARATH	UDP-glycosyltransferase 87A1 OS=Arabidopsis thaliana GN=UGT87A1 PE=2 SV=1	UGT87A1
MD01G1214100	0.893639	0.950699	1.77639	4.56582	123.013	74.4628	0.72422	0.23747	0.58468	FALSE	226.497	83.6755	1.4366	0.12812	0.36883	FALSE	563.804	77.7115	2.859	6.99e-10	5.57e-08	UP	sp|Q9SUQ3|Y4374_ARATH	Probable inactive receptor kinase At4g23740 OS=Arabidopsis thaliana GN=At4g23740 PE=2 SV=1	At4g23740
MD01G1217400	1.70143	0.140706	0.191865	0.135349	4.15402	28.8712	-2.797	0.0071851	0.07755	FALSE	4.95392	32.4343	-2.7109	0.0015816	0.016886	DOWN	3.3482	30.0439	-3.1656	0.0016383	0.016841	DOWN	sp|O65717|CNGC1_ARATH	Cyclic nucleotide-gated ion channel 1 OS=Arabidopsis thaliana GN=CNGC1 PE=1 SV=1	CNGC1
MD01G1218300	3.19077	0.401647	0.988762	0.949052	40.6228	240.295	-2.5644	6.95e-05	0.0029295	DOWN	108.184	269.847	-1.3187	0.0017184	0.018001	DOWN	100.16	249.923	-1.3192	0.011098	0.075568	FALSE	sp|Q94A79|DMS3_ARATH	Protein DEFECTIVE IN MERISTEM SILENCING 3 OS=Arabidopsis thaliana GN=DMS3 PE=1 SV=1	DMS3
MD11G1062800	9.44896	5.23188	3.1635	4.17275	487.013	539.009	-0.14635	0.67889	0.93938	FALSE	266.227	605.283	-1.185	0.0016966	0.017819	DOWN	332.023	561.151	-0.75711	0.30499	0.68231	FALSE	sp|O64732|U87A1_ARATH	UDP-glycosyltransferase 87A1 OS=Arabidopsis thaliana GN=UGT87A1 PE=2 SV=1	UGT87A1
MD01G1219500	10.4116	96.6761	41.3248	49.88	43005.1	2635.76	4.0282	0.05301	0.26557	FALSE	16460.4	2960.18	2.4752	0.013268	0.080085	FALSE	18625.3	2743.2	2.7633	6.35e-11	6.53e-09	UP	sp|Q03460|GLSN_MEDSA	Glutamate synthase [NADH], amyloplastic OS=Medicago sativa PE=1 SV=1	1
MD12G1114100	0.900889	4.63105	9.8651	20.1	372.672	46.1711	3.0128	8.33e-07	0.00010846	UP	755.027	51.8735	3.8635	2.29e-06	8.6e-05	UP	1508.31	48.2175	4.9672	2.04e-25	2.46e-22	UP	sp|Q9SJL0|U86A1_ARATH	UDP-glycosyltransferase 86A1 OS=Arabidopsis thaliana GN=UGT86A1 PE=2 SV=1	UGT86A1
MD01G1220700	31.8713	33.2341	15.6868	6.42241	4784.98	2813.96	0.76591	0.32466	0.67984	FALSE	2101.34	3158.41	-0.58789	0.22056	0.51413	FALSE	807.956	2923.96	-1.8556	0.0021885	0.021273	DOWN	sp|Q9M3B0|PME34_ARATH	Probable pectinesterase/pectinesterase inhibitor 34 OS=Arabidopsis thaliana GN=PME34 PE=2 SV=1	PME34
MD01G1221900	1.47737	0.0733084	0.173067	0.0409975	3.83328	57.955	-3.9183	2.56e-05	0.0014117	DOWN	9.84495	65.0751	-2.7246	4.82e-05	0.0010642	DOWN	2.18926	60.2766	-4.7831	1.62e-07	6.55e-06	DOWN	--	--	0
MD01G1222000	0.435084	0.0133648	0.00336585	0.0224038	1.22423	31.4948	-4.6852	0.00020951	0.0066646	DOWN	0.371577	35.3737	-6.5729	4.94e-06	0.00016131	DOWN	2.21806	32.8748	-3.8896	0.00061385	0.0076476	DOWN	sp|O65717|CNGC1_ARATH	Cyclic nucleotide-gated ion channel 1 OS=Arabidopsis thaliana GN=CNGC1 PE=1 SV=1	CNGC1
MD01G1222400	6.19703	0.859786	2.40481	3.61524	63.9719	313.949	-2.295	0.00019369	0.006287	DOWN	178.907	352.679	-0.97914	0.012664	0.077676	FALSE	267.073	327.008	-0.29209	0.5166	0.86784	FALSE	sp|Q9M3A3|ABIL2_ARATH	Protein ABIL2 OS=Arabidopsis thaliana GN=ABIL2 PE=2 SV=1	ABIL2
MD01G1222600	5.06193	7.30548	8.11966	17.3928	747.902	305.395	1.2922	0.24479	0.59272	FALSE	798.526	342.83	1.2198	0.57791	0.8622	FALSE	1572.91	316.937	2.3112	0.0012824	0.013854	UP	sp|P9WNH1|BPOC_MYCTU	Putative non-heme bromoperoxidase BpoC OS=Mycobacterium tuberculosis (strain ATCC 25618 / H37Rv) GN=bpoC PE=1 SV=1	bpoC
MD01G1222700	26.8124	8.16454	9.46996	6.47314	753.413	1648.86	-1.13	0.037854	0.21967	FALSE	857.837	1850.97	-1.1095	0.012627	0.077587	FALSE	575.406	1711.45	-1.5726	0.00072455	0.0087755	DOWN	--	--	0
MD01G1223200	5.83952	12.6983	9.83548	5.52101	1102.18	314.514	1.8092	0.0018114	0.0312	UP	796.015	353.136	1.1726	0.0008906	0.010795	UP	429.191	327.172	0.39157	0.31478	0.69311	FALSE	sp|P49599|P2C57_ARATH	Protein phosphatase 2C 57 OS=Arabidopsis thaliana GN=PPH1 PE=1 SV=2	PPH1
MD01G1223900	8.84585	16.9775	15.4522	6.69648	1057.84	349.351	1.5984	0.0057457	0.067135	FALSE	908.068	392.306	1.2108	0.00046701	0.006517	UP	379.742	363.845	0.061695	0.77524	0.99034	FALSE	sp|P81760|TL17_ARATH	Thylakoid lumenal 17.4 kDa protein, chloroplastic OS=Arabidopsis thaliana GN=TL17 PE=1 SV=2	TL17
MD01G1224000	3.44524	20.8781	8.21147	1.92419	344.612	36.9036	3.2231	1.97e-07	3.7e-05	UP	129.444	41.4704	1.6422	0.0029174	0.026628	UP	30.4583	38.6493	-0.34361	0.72766	0.97626	FALSE	--	--	0
MD01G1224100	3.60942	2.82164	5.51348	1.74978	446.121	405.395	0.13811	0.67863	0.93933	FALSE	947.093	455.198	1.057	0.0037655	0.03223	UP	277.782	421.745	-0.60242	0.25171	0.61689	FALSE	sp|Q6LA54|YF48_SCHPO	Uncharacterized WD repeat-containing protein C3H5.08c OS=Schizosaccharomyces pombe (strain 972 / ATCC 24843) GN=SPAC3H5.08c PE=1 SV=2	SPAC3H5.08c
MD01G1224800	180.026	205.145	390.424	378.111	7171.04	4505.54	0.67048	0.32133	0.67676	FALSE	14418.3	5059.64	1.5108	0.001594	0.017005	UP	13704.9	4688.92	1.5474	8.76e-05	0.0015285	UP	sp|Q2V3E2|YIPL5_ARATH	Protein yippee-like At4g27740 OS=Arabidopsis thaliana GN=At4g27740 PE=3 SV=1	At4g27740
MD01G1225000	0.249969	0.284583	0.824819	1.55442	28.1118	16.4525	0.77287	0.2935	0.64847	FALSE	88.1567	18.4908	2.2533	0.35246	0.67201	FALSE	150.582	17.2037	3.1298	3.03e-08	1.5e-06	UP	sp|O65717|CNGC1_ARATH	Cyclic nucleotide-gated ion channel 1 OS=Arabidopsis thaliana GN=CNGC1 PE=1 SV=1	CNGC1
MD12G1114200	3.52758	16.1881	35.6295	64.6716	1801.9	252.029	2.8379	5.33e-07	7.7e-05	UP	3797.4	283.132	3.7455	2.13e-06	8.12e-05	UP	6729.25	263.262	4.6759	3.91e-25	4.23e-22	UP	sp|Q9SJL0|U86A1_ARATH	UDP-glycosyltransferase 86A1 OS=Arabidopsis thaliana GN=UGT86A1 PE=2 SV=1	UGT86A1
MD01G1225700	7.31364	37.5676	29.2614	45.1821	4098.05	481.36	3.0897	0.010823	0.1013	FALSE	3096.16	540.772	2.5174	0.19238	0.47433	FALSE	4490.8	501.001	3.1641	8.73e-05	0.0015251	UP	sp|F4IJ77|AATP4_ARATH	AAA-ATPase At2g46620 OS=Arabidopsis thaliana GN=At2g46620 PE=2 SV=1	At2g46620
MD01G1226200	58.4268	85.884	119.077	90.3338	5434.12	2456.42	1.1455	0.023726	0.16484	FALSE	7523.09	2758.7	1.4473	1.54e-05	0.00041352	UP	5527.53	2555.51	1.113	0.0050245	0.040964	UP	sp|Q69NG5|6PGL4_ORYSJ	Probable 6-phosphogluconolactonase 4, chloroplastic OS=Oryza sativa subsp. japonica GN=Os09g0529100 PE=2 SV=2	Os09g0529100
MD01G1226600	222.968	173.494	308.788	142.753	10237.2	9401.1	0.12291	0.69878	0.95082	FALSE	19422.1	10561	0.87896	0.0056631	0.043253	UP	8594.79	9796.48	-0.1888	0.80185	0.9993	FALSE	sp|Q651Z5|HOX6_ORYSJ	Homeobox-leucine zipper protein HOX6 OS=Oryza sativa subsp. japonica GN=HOX6 PE=2 SV=1	HOX6
MD01G1227200	12.2396	12.3473	12.2685	19.2382	1408.04	833.404	0.7566	0.34972	0.70363	FALSE	1270.22	936.134	0.44029	0.34124	0.65946	FALSE	1929.97	868.478	1.152	0.0057898	0.045946	UP	sp|Q9FIM9|CAMK4_ARATH	CDPK-related kinase 4 OS=Arabidopsis thaliana GN=CRK4 PE=2 SV=1	CRK4
MD01G1227700	13.3894	11.6056	18.3954	23.6019	1008.72	769.892	0.3898	0.36071	0.71457	FALSE	1637.09	864.784	0.92072	0.13448	0.38055	FALSE	1980.29	802.227	1.3036	0.0012869	0.013892	UP	sp|Q9LPI5|CID11_ARATH	Polyadenylate-binding protein-interacting protein 11 OS=Arabidopsis thaliana GN=CID11 PE=2 SV=1	CID11
MD01G1228200	5.21587	72.2318	33.8683	14.2649	10096.4	436.598	4.5314	0.00020782	0.0066169	UP	4337.68	490.404	3.1449	1.76e-07	9.63e-06	UP	1762.73	454.301	1.9561	0.043662	0.20604	FALSE	sp|Q6LA42|APRR5_ARATH	Two-component response regulator-like APRR5 OS=Arabidopsis thaliana GN=APRR5 PE=1 SV=2	APRR5
MD09G1143200	0.177918	0.528143	1.88307	4.92783	6.83008	1.49955	2.1874	0.32313	0.67834	FALSE	24.1042	1.68616	3.8375	0.0051841	0.040724	UP	61.2192	1.56961	5.2855	1.47e-06	4.59e-05	UP	sp|Q9LMF1|U85A3_ARATH	UDP-glycosyltransferase 85A3 OS=Arabidopsis thaliana GN=UGT85A3 PE=2 SV=2	UGT85A3
MD01G1229600	0	0.0247116	0.151448	1.64005	0.944538	0	Inf	0.7464	0.96846	FALSE	4.91151	0	Inf	0.070034	0.2495	FALSE	51.6931	0	Inf	6.86e-12	8.92e-10	UP	sp|Q58FZ0|NAKR2_ARATH	Protein SODIUM POTASSIUM ROOT DEFECTIVE 2 OS=Arabidopsis thaliana GN=NAKR2 PE=2 SV=1	NAKR2
MD01G1229700	17.3373	37.6313	17.2989	38.169	3879.51	1058.35	1.8741	0.16044	0.48035	FALSE	1596.06	1189.13	0.4246	0.56271	0.85113	FALSE	3385.97	1107.33	1.6125	0.00036205	0.0049775	UP	sp|Q9FLU5|HIP9_ARATH	Heavy metal-associated isoprenylated plant protein 9 OS=Arabidopsis thaliana GN=HIPP09 PE=2 SV=1	HIPP09
MD01G1230000	2.0046	16.7143	10.5971	6.71989	1296.53	96.9211	3.7417	5.38e-06	0.00043961	UP	795.207	108.857	2.8689	0.0012737	0.014322	UP	475.949	101.032	2.236	0.0081275	0.059778	FALSE	sp|O81916|YC22_ARATH	Uncharacterized calcium-binding protein At1g02270 OS=Arabidopsis thaliana GN=At1g02270 PE=2 SV=2	At1g02270
MD01G1230100	14.9383	119.962	91.2533	55.1792	14650.9	1158.75	3.6603	1.56e-09	8.46e-07	UP	11011.5	1301.49	3.0808	0.003628	0.03137	UP	6307.26	1207.6	2.3849	0.015953	0.09955	FALSE	sp|O81916|YC22_ARATH	Uncharacterized calcium-binding protein At1g02270 OS=Arabidopsis thaliana GN=At1g02270 PE=2 SV=2	At1g02270
MD01G1230800	4.30099	0.700434	1.35631	3.27998	72.8296	303.337	-2.0583	0.00077985	0.017152	DOWN	138.763	340.625	-1.2956	0.0013848	0.015249	DOWN	337	315.719	0.094108	0.82183	1	FALSE	sp|Q8LG53|UN932_ARATH	UNC93-like protein 2 OS=Arabidopsis thaliana GN=At1g18010 PE=2 SV=2	At1g18010
MD01G1230900	4.33047	0.739889	1.72441	3.99246	61.4705	237.4	-1.9494	0.002153	0.034834	DOWN	137.684	266.65	-0.95358	0.084518	0.28283	FALSE	315.339	247.644	0.34864	0.50425	0.8597	FALSE	sp|Q8LG53|UN932_ARATH	UNC93-like protein 2 OS=Arabidopsis thaliana GN=At1g18010 PE=2 SV=2	At1g18010
MD01G1231200	61.2749	11.0025	17.5569	24.0432	1213.18	4570.38	-1.9135	0.00059999	0.014267	DOWN	1955.57	5131.97	-1.3919	2.98e-05	0.00071343	DOWN	2604.08	4754.27	-0.86845	0.032065	0.16511	FALSE	--	--	0
MD01G1231600	11.0148	16.622	37.1652	93.082	291.757	122.018	1.2577	0.046197	0.24666	FALSE	661.983	137.123	2.2713	0.2295	0.52682	FALSE	1564.37	127.3	3.6193	0.00022665	0.0033917	UP	sp|Q9FIR9|LSU2_ARATH	Protein RESPONSE TO LOW SULFUR 2 OS=Arabidopsis thaliana GN=LSU2 PE=2 SV=1	LSU2
MD01G1232700	7.15296	1.28663	0.950576	1.51613	63.8588	221.473	-1.7942	0.001858	0.031709	DOWN	42.0453	248.744	-2.5646	1.85e-08	1.38e-06	DOWN	67.7255	230.372	-1.7662	0.00035819	0.0049353	DOWN	--	--	0
MD01G1232800	13.9395	8.72869	34.7026	36.9583	339.571	368.682	-0.11866	0.90036	1	FALSE	1401.29	414.168	1.7585	0.024121	0.122	FALSE	1451.23	384.567	1.916	0.0010349	0.011693	UP	--	--	0
MD01G1233000	288.954	75.567	87.9965	56.9578	1439.51	3729.82	-1.3735	0.012737	0.11226	FALSE	1667.33	4188.47	-1.3289	0.00010926	0.0020725	DOWN	1054.2	3882.56	-1.8809	8.39e-06	0.00020709	DOWN	--	--	0
MD01G1233900	0.500825	0.0384847	0.217233	0.558818	3.67269	37.68	-3.3589	0.0012449	0.023948	DOWN	23.2534	42.3162	-0.86377	0.20916	0.49819	FALSE	57.6236	39.2001	0.5558	0.58743	0.90939	FALSE	--	--	0
MD02G1179400	4.76288	7.30167	9.02444	13.8115	518.117	231.958	1.1594	0.0432	0.23696	FALSE	672.18	260.528	1.3674	0.00022595	0.0037213	UP	990.855	241.711	2.0354	2.56e-06	7.44e-05	UP	sp|O22183|U84B2_ARATH	UDP-glycosyltransferase 84B2 OS=Arabidopsis thaliana GN=UGT84B2 PE=3 SV=1	UGT84B2
MD01G1236100	9.97561	2.31837	2.92441	4.94833	181.687	541.708	-1.5761	0.005713	0.066887	FALSE	235.919	608.437	-1.3668	0.00065601	0.0084971	DOWN	395.06	563.37	-0.51201	0.19899	0.54409	FALSE	sp|Q6NVR9|ATAD3_XENTR	ATPase family AAA domain-containing protein 3 OS=Xenopus tropicalis GN=atad3 PE=2 SV=1	atad3
MD01G1236200	7.15968	2.02785	1.99962	2.75423	62.6273	153.398	-1.2924	0.040518	0.2286	FALSE	64.0715	172.292	-1.4271	0.0013428	0.014873	DOWN	85.7042	159.536	-0.89644	0.072438	0.29018	FALSE	--	--	0
MD01G1236300	3.16035	0.137363	0.405776	1.46708	16.826	269.053	-3.9991	4.33e-09	1.84e-06	DOWN	52.7837	302.108	-2.5169	1.15e-09	1.24e-07	DOWN	176.987	279.661	-0.66004	0.20958	0.55997	FALSE	sp|P31687|4CL2_SOYBN	4-coumarate--CoA ligase 2 OS=Glycine max PE=2 SV=2	2
MD06G1200500	1.53123	0.536723	0.222895	0.0707328	70.6271	108.99	-0.6259	0.36477	0.71873	FALSE	24.2225	122.37	-2.3368	7.99e-06	0.00024077	DOWN	7.49047	113.33	-3.9193	2.33e-09	1.58e-07	DOWN	sp|Q9SGA8|U83A1_ARATH	UDP-glycosyltransferase 83A1 OS=Arabidopsis thaliana GN=UGT83A1 PE=2 SV=1	UGT83A1
MD01G1237400	7.56905	11.2159	11.3147	14.8251	700.013	288.551	1.2786	0.069277	0.30857	FALSE	656.929	324.043	1.0196	0.0059799	0.044998	UP	824.195	300.513	1.4556	0.00053398	0.0068402	UP	sp|Q9SBA5|ITPK1_ARATH	Inositol-tetrakisphosphate 1-kinase 1 OS=Arabidopsis thaliana GN=ITPK1 PE=1 SV=1	ITPK1
MD01G1238100	8.19162	8.70904	14.7971	5.52943	321.937	214.874	0.58329	0.32297	0.67825	FALSE	583.357	241.295	1.2736	0.0004162	0.0059381	UP	210.178	223.728	-0.090133	0.88799	1	FALSE	--	--	0
MD01G1238700	0.359779	5.44458	2.00079	2.17028	394.291	16.3612	4.5909	0.144	0.45526	FALSE	146.297	18.3869	2.9921	0.23083	0.52847	FALSE	143.012	17.1466	3.0601	6.73e-08	3e-06	UP	sp|Q9SK86|ADHL1_ARATH	Alcohol dehydrogenase-like 1 OS=Arabidopsis thaliana GN=At1g22430 PE=2 SV=1	At1g22430
MD02G1000700	117.132	130.599	245.522	313.507	6132.92	3683.08	0.73566	0.12537	0.42319	FALSE	11696.6	4138.51	1.4989	7.98e-06	0.00024068	UP	14534.7	3840.18	1.9203	2.99e-06	8.49e-05	UP	--	--	0
MD02G1001200	9.14406	2.20849	1.99065	2.14756	289.066	810.915	-1.4882	0.0052841	0.06371	FALSE	258.869	910.397	-1.8143	9.98e-07	4.27e-05	DOWN	264.738	843.176	-1.6713	0.0032576	0.029347	DOWN	sp|O80585|MTHR2_ARATH	Methylenetetrahydrofolate reductase 2 OS=Arabidopsis thaliana GN=MTHFR2 PE=1 SV=2	MTHFR2
MD02G1001300	26.092	18.2981	33.2687	49.7517	1988.15	1860.21	0.09596	0.7259	0.96183	FALSE	3539.36	2089.16	0.76056	0.023675	0.12053	FALSE	5201.58	1936.6	1.4254	0.00047997	0.0062472	UP	sp|O49621|MLO1_ARATH	MLO-like protein 1 OS=Arabidopsis thaliana GN=MLO1 PE=1 SV=1	MLO1
MD02G1002100	0.330475	0.105304	0.0137763	0.0505652	7.73938	14.0462	-0.85989	0.44404	0.7872	FALSE	0.983562	15.7843	-4.0043	0.0036981	0.031822	DOWN	2.94782	14.6455	-2.3127	0.098923	0.35752	FALSE	sp|Q9SLN8|DBR_TOBAC	2-alkenal reductase (NADP(+)-dependent) OS=Nicotiana tabacum GN=DBR PE=1 SV=1	DBR
MD02G1002300	34.3837	59.6811	60.1624	58.797	3784.24	1350.48	1.4865	0.0090955	0.090279	FALSE	3563.3	1516.75	1.2322	0.00022706	0.0037335	UP	3425.85	1406.19	1.2847	0.0024894	0.023535	UP	sp|Q9SLN8|DBR_TOBAC	2-alkenal reductase (NADP(+)-dependent) OS=Nicotiana tabacum GN=DBR PE=1 SV=1	DBR
MD02G1002600	0.655285	0.805802	1.28625	2.57592	56.2053	29.8725	0.91189	0.17432	0.50113	FALSE	90.571	33.5688	1.4319	0.020001	0.10701	FALSE	170.836	31.2229	2.4519	2.2e-06	6.5e-05	UP	sp|Q9SLN8|DBR_TOBAC	2-alkenal reductase (NADP(+)-dependent) OS=Nicotiana tabacum GN=DBR PE=1 SV=1	DBR
MD01G1142600	0.6051	0.838384	1.85436	3.76797	59.726	26.2061	1.1885	0.12822	0.42844	FALSE	121.175	29.4494	2.0408	0.0014747	0.016006	UP	234.164	27.346	3.0981	6.21e-06	0.00015966	UP	sp|Q9M052|U76F1_ARATH	UDP-glycosyltransferase 76F1 OS=Arabidopsis thaliana GN=UGT76F1 PE=2 SV=1	UGT76F1
MD02G1003700	7.15338	0.695466	2.07445	2.85755	66.926	483.212	-2.852	2.57e-06	0.00025403	DOWN	204.384	542.662	-1.4088	0.00020275	0.0034052	DOWN	278.534	502.82	-0.85219	0.056747	0.24645	FALSE	sp|Q9R0X4|ACOT9_MOUSE	Acyl-coenzyme A thioesterase 9, mitochondrial OS=Mus musculus GN=Acot9 PE=1 SV=1	Acot9
MD02G1005100	42.8658	72.2946	71.2098	53.7477	3737.56	1410.02	1.4064	0.0090886	0.090233	FALSE	3570.6	1583.44	1.1731	0.0015221	0.016397	UP	2609.16	1466.9	0.83082	0.05116	0.22922	FALSE	sp|P42322|CANB1_NAEGR	Calcineurin subunit B OS=Naegleria gruberi GN=CNB1 PE=3 SV=1	CNB1
MD02G1005800	92.1846	83.5765	21.5647	40.178	9876.74	6147.44	0.68405	0.77287	0.97937	FALSE	2184.39	6902.71	-1.6599	7.79e-07	3.44e-05	DOWN	4083.07	6398.87	-0.64816	0.11435	0.39212	FALSE	sp|P26413|HSP70_SOYBN	Heat shock 70 kDa protein OS=Glycine max GN=HSP70 PE=3 SV=1	HSP70
MD02G1006400	9.58505	17.6636	18.1534	11.6845	1929.28	669.673	1.5265	0.0051344	0.062442	FALSE	1935.12	751.959	1.3637	0.0019386	0.01962	UP	1185.05	696.977	0.76577	0.055088	0.24172	FALSE	--	--	0
MD02G1006600	14.9833	16.2149	24.3111	23.9401	2086.36	1260.06	0.7275	0.13637	0.44286	FALSE	3136.58	1415.07	1.1483	0.03506	0.1584	FALSE	2968.53	1311.92	1.1781	0.0048358	0.039825	UP	sp|Q9U5L1|SRPRA_DROME	Signal recognition particle receptor subunit alpha homolog OS=Drosophila melanogaster GN=Gtp-bp PE=1 SV=2	Gtp-bp
MD02G1008100	0.406807	0.0521514	0.0119339	0.00610365	6.02453	35.7425	-2.5687	0.01047	0.099212	FALSE	1.40149	40.1225	-4.8394	1.94e-06	7.55e-05	DOWN	0.729754	37.1141	-5.6684	3.02e-06	8.56e-05	DOWN	sp|C0LGK9|Y2242_ARATH	Probable LRR receptor-like serine/threonine-protein kinase At2g24230 OS=Arabidopsis thaliana GN=At2g24230 PE=2 SV=1	At2g24230
MD02G1009300	3.54695	2.71677	8.27166	12.9837	312.781	268.357	0.221	0.64284	0.91829	FALSE	919.997	301.405	1.6099	0.013208	0.079834	FALSE	1448.26	279.44	2.3737	3.77e-08	1.81e-06	UP	sp|P93338|GAPN_NICPL	NADP-dependent glyceraldehyde-3-phosphate dehydrogenase OS=Nicotiana plumbaginifolia GN=GAPN PE=2 SV=1	GAPN
MD02G1010500	38.828	27.787	16.3378	11.1263	1953.31	1681.44	0.21622	0.9588	1	FALSE	1038.24	1888.13	-0.86282	0.015771	0.090669	FALSE	689.741	1751.06	-1.3441	0.0017628	0.017853	DOWN	sp|Q9FGT8|TIL_ARATH	Temperature-induced lipocalin-1 OS=Arabidopsis thaliana GN=TIL PE=1 SV=1	TIL
MD02G1010600	2.05663	122.559	49.2899	84.9803	7226.93	68.8306	6.7142	0.0074382	0.079047	FALSE	2548.67	77.332	5.0425	1.51e-11	2.61e-09	UP	4376.45	71.8372	5.9289	0.0007889	0.0093834	UP	--	--	0
MD02G1010800	10.1341	16.9343	20.3975	18.9776	1960.83	760.292	1.3668	0.0086286	0.087044	FALSE	2309.57	853.995	1.4353	2.51e-05	0.00062597	UP	2118.4	792.28	1.4189	0.00095999	0.011017	UP	sp|F4IPM3|CB60E_ARATH	Calmodulin-binding protein 60 E OS=Arabidopsis thaliana GN=CBP60E PE=2 SV=1	CBP60E
MD02G1010900	1.38429	15.3034	5.58833	10.0285	1176.72	60.6713	4.2776	0.02485	0.16941	FALSE	394.388	68.1632	2.5325	0.11717	0.34942	FALSE	664.538	63.323	3.3916	0.00019268	0.0029465	UP	sp|Q5VST6|AB17B_HUMAN	Protein ABHD17B OS=Homo sapiens GN=ABHD17B PE=1 SV=1	ABHD17B
MD02G1011200	1.00868	2.40937	3.33117	9.41401	337.173	83.5878	2.0121	0.087348	0.34966	FALSE	430.947	93.971	2.1972	0.14928	0.4064	FALSE	1148.26	87.2587	3.718	3.84e-08	1.84e-06	UP	sp|Q9LDQ3|CRK35_ARATH	Putative cysteine-rich receptor-like protein kinase 35 OS=Arabidopsis thaliana GN=CRK35 PE=3 SV=3	CRK35
MD02G1011400	4.39231	4.78311	4.88583	7.00925	689.956	397.103	0.79699	0.1626	0.48413	FALSE	667.791	445.987	0.58239	0.11432	0.34399	FALSE	932.398	413.636	1.1726	0.0059739	0.047116	UP	sp|O64793|Y1675_ARATH	G-type lectin S-receptor-like serine/threonine-protein kinase At1g67520 OS=Arabidopsis thaliana GN=At1g67520 PE=2 SV=3	At1g67520
MD02G1011800	9.21422	18.4315	18.0715	13.7651	1290.26	410.971	1.6506	0.0026611	0.040258	UP	1230.61	461.487	1.415	0.00038645	0.00564	UP	897.157	427.678	1.0688	0.050057	0.2261	FALSE	--	--	0
MD02G1012000	8.15129	3.08514	1.62082	0.567918	464.366	955.047	-1.0403	0.38385	0.73649	FALSE	275.538	1072.87	-1.9612	0.00095081	0.011399	DOWN	93.4666	996.744	-3.4147	1.39e-06	4.37e-05	DOWN	sp|Q9FII5|TDR_ARATH	Leucine-rich repeat receptor-like protein kinase TDR OS=Arabidopsis thaliana GN=TDR PE=1 SV=1	TDR
MD02G1013200	27.3106	7.58154	10.1919	5.44094	558.712	1427.99	-1.3538	0.017407	0.13622	FALSE	801.198	1603.57	-1.0011	0.0040098	0.033771	DOWN	405.42	1485.59	-1.8735	1.67e-05	0.0003749	DOWN	sp|Q852U6|RHY1A_ARATH	Probable E3 ubiquitin-protein ligase RHY1A OS=Arabidopsis thaliana GN=RHY1A PE=2 SV=1	RHY1A
MD02G1013300	2.82347	0.698481	0.904009	0.589776	70.2103	198.373	-1.4985	0.02842	0.1845	FALSE	94.798	222.741	-1.2324	0.003431	0.030112	DOWN	58.2552	206.579	-1.8262	0.00054566	0.0069471	DOWN	--	--	0
MD02G1013500	20.4564	18.8881	6.44283	0.809531	296.873	212.522	0.48223	0.44248	0.78679	FALSE	101.485	238.754	-1.2343	0.10993	0.33509	FALSE	11.5906	221.753	-4.2579	7.68e-10	6.03e-08	DOWN	--	--	0
MD02G1014300	0.937585	0.115017	0.159378	0.658759	11.5502	58.4628	-2.3396	0.0027983	0.041474	DOWN	14.2332	65.6556	-2.2057	0.00065159	0.0084559	DOWN	58.4021	60.9413	-0.061399	0.96143	1	FALSE	sp|Q5SMK6|P2C54_ORYSJ	Probable protein phosphatase 2C 54 OS=Oryza sativa subsp. japonica GN=Os06g0179700 PE=2 SV=1	Os06g0179700
MD02G1016700	13.8907	11.8757	2.77138	1.82028	1475.93	972.706	0.60155	0.8443	1	FALSE	290.069	1092.25	-1.9128	0.0065841	0.048175	DOWN	182.03	1013.92	-2.4777	0.00075816	0.0091048	DOWN	--	--	0
MD02G1018400	43.9101	86.0443	70.8003	62.6541	10760.8	3332.95	1.6909	0.039435	0.22535	FALSE	8171.18	3742.55	1.1265	0.0015737	0.016815	UP	6924.29	3467.03	0.99797	0.011951	0.080075	FALSE	sp|Q8BID8|FXL14_MOUSE	F-box/LRR-repeat protein 14 OS=Mus musculus GN=Fbxl14 PE=2 SV=1	Fbxl14
MD01G1143600	20.9614	4.18305	5.94664	3.83871	305.166	1140.15	-1.9016	0.00098944	0.020397	DOWN	472.492	1280.56	-1.4384	0.00044589	0.0062825	DOWN	286.131	1186.05	-2.0514	0.00096421	0.011056	DOWN	sp|Q9M052|U76F1_ARATH	UDP-glycosyltransferase 76F1 OS=Arabidopsis thaliana GN=UGT76F1 PE=2 SV=1	UGT76F1
MD02G1018600	77.3484	29.8956	33.2356	25.5653	1801.96	3083.57	-0.77503	0.14502	0.45645	FALSE	1972.73	3462.21	-0.8115	0.017544	0.0974	FALSE	1484.75	3205.14	-1.1102	0.0057515	0.045712	DOWN	--	--	0
MD02G1018900	12.2965	4.02657	4.74509	2.44694	506.871	1088.14	-1.1022	0.065996	0.29999	FALSE	616.876	1221.94	-0.98613	0.0063854	0.047073	DOWN	311.498	1131.81	-1.8613	1.67e-05	0.0003749	DOWN	sp|O22187|Y2232_ARATH	Probable receptor-like protein kinase At2g23200 OS=Arabidopsis thaliana GN=At2g23200 PE=3 SV=1	At2g23200
MD02G1019700	0.406328	0.914465	2.65918	6.61741	58.1608	17.4705	1.7351	0.14746	0.4604	FALSE	178.504	19.6298	3.1848	0.026206	0.12951	FALSE	426.735	18.2075	4.5507	2.22e-09	1.54e-07	UP	sp|Q39224|SRG1_ARATH	Protein SRG1 OS=Arabidopsis thaliana GN=SRG1 PE=2 SV=1	SRG1
MD02G1019900	0	0.00719245	0.00883906	0	0.375871	0	Inf	0.94403	1	FALSE	0.491781	0	Inf	0.96344	1	FALSE	0	0	NA	NA	NA	NA	sp|O04133|SRC2_SOYBN	Protein SRC2 OS=Glycine max GN=SRC2 PE=2 SV=1	SRC2
MD02G1020000	26.1385	25.0481	50.5341	41.042	1904.59	1399.77	0.44429	0.37125	0.72564	FALSE	4024.98	1571.88	1.3565	5.21e-05	0.0011347	UP	3182.9	1456.46	1.1279	0.0040843	0.034978	UP	sp|Q39224|SRG1_ARATH	Protein SRG1 OS=Arabidopsis thaliana GN=SRG1 PE=2 SV=1	SRG1
MD02G1020100	14.7525	1.37173	3.00109	5.66596	108.632	795.299	-2.872	8.33e-07	0.00010846	DOWN	233.04	892.987	-1.9381	1.96e-07	1.06e-05	DOWN	432.837	826.603	-0.93337	0.044096	0.20735	FALSE	sp|Q39224|SRG1_ARATH	Protein SRG1 OS=Arabidopsis thaliana GN=SRG1 PE=2 SV=1	SRG1
MD02G1020800	15.0082	80.7529	48.5666	41.7311	11195	1234.11	3.1813	0.015377	0.12626	FALSE	6110.32	1386.09	2.1402	6.42e-08	4.06e-06	UP	5076.93	1284.86	1.9823	9.42e-06	0.00022986	UP	sp|Q944B6|TYRA1_ARATH	Arogenate dehydrogenase 1, chloroplastic OS=Arabidopsis thaliana GN=TYRAAT1 PE=1 SV=1	TYRAAT1
MD02G1021600	30.7189	50.2468	56.1247	42.727	7834.41	3065.46	1.3537	0.012236	0.1095	FALSE	8483.64	3441.95	1.3015	0.00010046	0.0019321	UP	6250.67	3187.6	0.97154	0.021139	0.12222	FALSE	sp|P60300|CLCG_ARATH	Putative chloride channel-like protein CLC-g OS=Arabidopsis thaliana GN=CBSCLC6 PE=3 SV=2	CBSCLC6
MD02G1022000	1.38991	0.300522	0.208857	0.192478	27.1493	82.8546	-1.6097	0.017063	0.13431	FALSE	18.2106	93.0003	-2.3525	5.22e-05	0.0011366	DOWN	16.5998	86.0136	-2.3734	0.00017813	0.002758	DOWN	sp|Q9ASQ5|CRCK3_ARATH	Calmodulin-binding receptor-like cytoplasmic kinase 3 OS=Arabidopsis thaliana GN=CRCK3 PE=2 SV=1	CRCK3
MD02G1022200	29.5156	9.19639	11.6277	9.12292	1529.6	3242.8	-1.0841	0.042624	0.2351	FALSE	1903.44	3640.77	-0.93564	0.0053949	0.041845	DOWN	1444.32	3370.84	-1.2227	0.0032294	0.029163	DOWN	sp|Q9ASQ5|CRCK3_ARATH	Calmodulin-binding receptor-like cytoplasmic kinase 3 OS=Arabidopsis thaliana GN=CRCK3 PE=2 SV=1	CRCK3
MD02G1022300	23.8523	1.6438	4.39241	3.93458	288.254	3074.85	-3.4151	4.34e-09	1.84e-06	DOWN	823.468	3453.25	-2.0682	1.26e-07	7.2e-06	DOWN	711.048	3197.28	-2.1688	8.21e-07	2.75e-05	DOWN	sp|O22060|SPSA1_CITUN	Probable sucrose-phosphate synthase 1 OS=Citrus unshiu GN=SPS1 PE=2 SV=1	SPS1
MD01G1144100	4.79431	2.41792	6.13274	9.75619	202.93	264.451	-0.38202	0.6086	0.89774	FALSE	510.404	296.975	0.7813	0.039466	0.17067	FALSE	770.536	275.098	1.4859	0.0025327	0.023874	UP	sp|Q9M052|U76F1_ARATH	UDP-glycosyltransferase 76F1 OS=Arabidopsis thaliana GN=UGT76F1 PE=2 SV=1	UGT76F1
MD02G1023500	4.74374	1.30337	0.556743	0.921616	12.6328	27.2068	-1.1068	0.16688	0.49081	FALSE	4.85492	30.5457	-2.6534	0.0025884	0.024322	DOWN	7.46265	28.248	-1.9204	0.042801	0.20333	FALSE	--	--	0
MD02G1024300	6.04663	8.46128	8.94622	6.62585	1037.53	472.072	1.1361	0.045729	0.24528	FALSE	1050.9	529.973	0.98764	0.0039173	0.033218	UP	759.547	490.506	0.63087	0.23909	0.60151	FALSE	--	--	0
MD02G1026000	1.54761	0.466723	0.290399	0.146615	19.3187	37.4608	-0.95538	0.15624	0.47364	FALSE	10.2165	42.0577	-2.0415	0.0063137	0.046693	DOWN	5.2801	38.9072	-2.8814	0.00075792	0.0091048	DOWN	--	--	0
MD02G1026400	0	0.0518037	0.0782789	0	0.408076	0	Inf	0.94405	1	FALSE	0.743153	0	Inf	0.79567	0.98153	FALSE	0	0	NA	NA	NA	NA	--	--	0
MD02G1026900	35.4563	56.1567	70.033	82.7755	4492.77	1814.83	1.3078	0.012722	0.1122	FALSE	5450.71	2038.08	1.4192	4.04e-05	0.00091635	UP	6287.4	1888.15	1.7355	3.98e-05	0.00078394	UP	--	--	0
MD01G1148700	7.67363	13.4802	29.9974	56.0208	986.277	357.274	1.465	0.0076796	0.080456	FALSE	2114.08	401.37	2.397	0.0016674	0.01761	UP	3850.39	371.988	3.3717	1.08e-14	2.49e-12	UP	sp|Q9M052|U76F1_ARATH	UDP-glycosyltransferase 76F1 OS=Arabidopsis thaliana GN=UGT76F1 PE=2 SV=1	UGT76F1
MD02G1028000	27.8693	42.9554	41.754	24.4264	4315.57	1739.35	1.311	0.02052	0.15156	FALSE	3937.14	1953.17	1.0113	0.0023489	0.022643	UP	2212.88	1809.43	0.29039	0.44271	0.81597	FALSE	sp|Q8LGE3|ARP6_ARATH	Actin-related protein 6 OS=Arabidopsis thaliana GN=ARP6 PE=1 SV=1	ARP6
MD02G1028100	4.43586	0.998433	0.913179	1.79398	239.945	670.414	-1.4823	0.0054272	0.06482	FALSE	204.652	752.879	-1.8792	3.48e-07	1.73e-05	DOWN	386.175	698.249	-0.85449	0.071567	0.28801	FALSE	sp|Q9BZH6|WDR11_HUMAN	WD repeat-containing protein 11 OS=Homo sapiens GN=WDR11 PE=1 SV=1	WDR11
MD02G1028300	1.32187	0.798744	2.53933	7.7976	24.6544	26.511	-0.10474	0.96006	1	FALSE	81.7265	29.8027	1.4554	0.41819	0.73561	FALSE	235.701	27.6246	3.0929	0.0010217	0.011577	UP	sp|P42849|UMEC_ARMRU	Umecyanin OS=Armoracia rusticana PE=1 SV=1	1
MD02G1029300	22.6918	22.1062	29.2968	41.2362	2339.83	1515	0.62708	0.26139	0.61359	FALSE	2971.38	1701.52	0.80431	0.042512	0.17907	FALSE	4029.41	1577.12	1.3533	0.00086755	0.010146	UP	sp|Q9ZQG9|E1314_ARATH	Glucan endo-1,3-beta-glucosidase 14 OS=Arabidopsis thaliana GN=At2g27500 PE=1 SV=2	At2g27500
MD02G1030600	6.97939	1.29597	2.35866	2.17614	60.485	234.041	-1.9521	0.0018852	0.03192	DOWN	113.693	262.894	-1.2093	0.026823	0.13164	FALSE	103.675	243.62	-1.2326	0.014731	0.093911	FALSE	--	--	0
MD02G1031100	10.3934	1.06586	2.99149	2.47845	58.7895	396.406	-2.7533	0.00016135	0.0055119	DOWN	179.915	445.293	-1.3074	0.028035	0.13575	FALSE	139.275	412.304	-1.5658	0.006301	0.049158	DOWN	sp|Q8LBH4|SPX1_ARATH	SPX domain-containing protein 1 OS=Arabidopsis thaliana GN=SPX1 PE=1 SV=2	SPX1
MD02G1031400	18.9469	2.52399	4.30037	5.49779	201.972	1011.54	-2.3243	0.00056141	0.01362	DOWN	343.559	1136.71	-1.7262	0.0050594	0.040006	DOWN	421.216	1055.74	-1.3256	0.044856	0.20987	FALSE	sp|O48782|HMOX1_ARATH	Heme oxygenase 1, chloroplastic OS=Arabidopsis thaliana GN=HO1 PE=1 SV=2	HO1
MD02G1032500	24.1376	10.2394	10.8308	5.71628	590.329	952.06	-0.68953	0.25252	0.60324	FALSE	639.309	1069.15	-0.74188	0.034964	0.15813	FALSE	319.429	990.373	-1.6325	0.00026156	0.0038181	DOWN	sp|Q76CU2|PDR1_TOBAC	Pleiotropic drug resistance protein 1 OS=Nicotiana tabacum GN=PDR1 PE=2 SV=1	PDR1
MD07G1208300	2.17502	0	0.0139769	0.0723638	0	40.7771	#NAME?	2.74e-07	4.66e-05	DOWN	0.350372	45.7737	-7.0295	5.4e-09	4.82e-07	DOWN	1.86759	42.3235	-4.5022	9.64e-06	0.000234	DOWN	sp|Q9M052|U76F1_ARATH	UDP-glycosyltransferase 76F1 OS=Arabidopsis thaliana GN=UGT76F1 PE=2 SV=1	UGT76F1
MD07G1208800	18.796	0.481339	0.536049	0.907912	37.2802	1030.21	-4.7884	0.0052549	0.063474	FALSE	43.6887	1155.61	-4.7253	0.0044882	0.036589	DOWN	69.8871	1065.76	-3.9307	0.014341	0.09197	FALSE	sp|Q9M052|U76F1_ARATH	UDP-glycosyltransferase 76F1 OS=Arabidopsis thaliana GN=UGT76F1 PE=2 SV=1	UGT76F1
MD02G1034300	5.36017	1.5968	1.85089	2.44915	187.266	460.394	-1.2978	0.029326	0.1879	FALSE	234.674	517.006	-1.1395	0.0025736	0.024242	DOWN	296.419	479.353	-0.69345	0.18179	0.51763	FALSE	sp|Q2R1M8|RH52C_ORYSJ	DEAD-box ATP-dependent RNA helicase 52C OS=Oryza sativa subsp. japonica GN=Os11g0599500 PE=3 SV=1	Os11g0599500
MD02G1034700	2.25228	7.3577	4.49004	10.5964	853.901	149.979	2.5093	0.15578	0.47278	FALSE	465.058	168.524	1.4645	0.09875	0.31247	FALSE	1064.21	156.655	2.7641	0.0010782	0.012064	UP	--	--	0
MD02G1035100	25.8736	4.25292	8.65096	9.82314	253.448	1100.19	-2.118	0.00027564	0.0080994	DOWN	539.478	1235.7	-1.1957	0.00077978	0.0097408	DOWN	591.498	1145.52	-0.95356	0.059182	0.25356	FALSE	sp|P83291|NB5R2_ARATH	NADH-cytochrome b5 reductase-like protein OS=Arabidopsis thaliana GN=CBR2 PE=1 SV=2	CBR2
MD02G1036700	43.4122	92.7392	101.905	82.6659	8293.51	2484.03	1.7393	0.0012197	0.023582	UP	8821.47	2789.57	1.661	9.23e-07	3.99e-05	UP	6971.88	2585.43	1.4311	0.00054976	0.0069945	UP	--	--	0
MD02G1037600	6.04458	7.73452	9.4215	17.8962	697.124	335.03	1.0571	0.11589	0.40623	FALSE	818.069	376.314	1.1203	0.18014	0.45589	FALSE	1491.85	348.547	2.0977	0.0026967	0.025148	UP	--	--	0
MD02G1039600	18.7301	5.1287	4.88991	4.56349	405.435	1043.7	-1.3642	0.01926	0.14571	FALSE	411.113	1171.88	-1.5112	1.55e-05	0.00041473	DOWN	363.602	1084.92	-1.5772	0.00029285	0.0041813	DOWN	sp|Q9LQT8|GAI_ARATH	DELLA protein GAI OS=Arabidopsis thaliana GN=GAI PE=1 SV=1	GAI
MD02G1040000	18.1969	3.93279	5.27182	9.95617	505.075	1582.88	-1.648	0.0027985	0.041474	DOWN	681.461	1777.55	-1.3832	5.36e-05	0.0011583	DOWN	1257.94	1648.42	-0.39002	0.35372	0.73456	FALSE	sp|O48788|Y2267_ARATH	Probable inactive receptor kinase At2g26730 OS=Arabidopsis thaliana GN=At2g26730 PE=1 SV=1	At2g26730
MD11G1090500	1.81286	0.769039	3.99406	7.83518	57.7498	86.5744	-0.58412	0.40216	0.75251	FALSE	283.927	97.2458	1.5458	0.038877	0.16913	FALSE	531.06	90.071	2.5597	0.00020934	0.0031672	UP	sp|Q9LTH2|U76E2_ARATH	UDP-glycosyltransferase 76E2 OS=Arabidopsis thaliana GN=UGT76E2 PE=2 SV=1	UGT76E2
MD02G1041100	2.14063	3.25116	4.04122	1.69571	103.926	43.2884	1.2635	0.063551	0.29338	FALSE	124.29	48.6012	1.3546	0.0042481	0.035224	UP	49.4481	45.0198	0.13535	0.78535	0.99342	FALSE	--	--	0
MD02G1041300	7.22608	2.5801	2.63269	1.89251	263.1	470.469	-0.83849	0.098922	0.37359	FALSE	255.683	528.329	-1.0471	0.0044738	0.036545	DOWN	174.567	489.417	-1.4873	0.0014799	0.015515	DOWN	sp|Q40392|TMVRN_NICGU	TMV resistance protein N OS=Nicotiana glutinosa GN=N PE=1 SV=1	N
MD02G1042300	19.4283	4.62758	4.94752	5.5582	620.924	1708.92	-1.4606	0.0054654	0.065016	FALSE	647.473	1918.8	-1.5673	7.44e-06	0.00022747	DOWN	703.622	1778.28	-1.3376	0.0015499	0.016105	DOWN	sp|Q93YV6|2A5I_ARATH	Serine/threonine protein phosphatase 2A 57 kDa regulatory subunit B&apos; iota isoform OS=Arabidopsis thaliana GN=B&apos;IOTA PE=2 SV=1	B&apos;IOTA
MD02G1003300	8.66216	109.942	190.365	412.193	9883.6	492.103	4.328	1.12e-08	3.84e-06	UP	16810.3	553.071	4.9257	1.9e-05	0.00049423	UP	34807.5	514.084	6.0813	6.38e-14	1.32e-11	UP	sp|O22822|U74F2_ARATH	UDP-glycosyltransferase 74F2 OS=Arabidopsis thaliana GN=UGT74F2 PE=1 SV=1	UGT74F2
MD10G1111000	9.09937	12.8888	30.1029	97.6457	1034.54	469.215	1.1407	0.053422	0.26647	FALSE	2329.24	527.295	2.1432	0.00035628	0.0052933	UP	7572.45	489.565	3.9512	7.81e-07	2.63e-05	UP	sp|O22822|U74F2_ARATH	UDP-glycosyltransferase 74F2 OS=Arabidopsis thaliana GN=UGT74F2 PE=1 SV=1	UGT74F2
MD02G1043200	0.804629	0.662993	1.58263	1.20616	57.1836	49.6518	0.20375	0.65546	0.92479	FALSE	145.702	55.8007	1.3847	0.0016724	0.017634	UP	108.006	51.8663	1.0582	0.037214	0.18392	FALSE	sp|Q9ZPI6|AIM1_ARATH	Peroxisomal fatty acid beta-oxidation multifunctional protein AIM1 OS=Arabidopsis thaliana GN=AIM1 PE=1 SV=1	AIM1
MD02G1043300	0.116597	0.00926055	0.0265012	0	1.19202	11.1383	-3.224	0.073877	0.32065	FALSE	3.60974	12.5082	-1.7929	0.1896	0.4703	FALSE	0	11.6197	#NAME?	0.0047188	0.039077	DOWN	sp|Q9ZPI6|AIM1_ARATH	Peroxisomal fatty acid beta-oxidation multifunctional protein AIM1 OS=Arabidopsis thaliana GN=AIM1 PE=1 SV=1	AIM1
MD02G1044400	25.0123	31.204	36.8693	27.0337	2057.61	1081.54	0.92789	0.077344	0.32767	FALSE	2391.3	1214.47	0.97747	0.0033573	0.029646	UP	1710.61	1125.39	0.60408	0.14379	0.45137	FALSE	sp|F4IUE7|COV1_ARATH	Protein CONTINUOUS VASCULAR RING 1 OS=Arabidopsis thaliana GN=COV1 PE=1 SV=2	COV1
MD02G1044800	2.76771	0.186807	0.36763	0.570052	21.0507	196.633	-3.2236	7.9e-07	0.0001038	DOWN	36.9634	220.785	-2.5785	3.25e-08	2.26e-06	DOWN	58.4088	204.451	-1.8075	0.00033788	0.0047035	DOWN	--	--	0
MD02G1045900	4.75813	2.88233	1.76272	0.803216	332.042	355.302	-0.097682	0.75639	0.97423	FALSE	192.288	398.957	-1.053	0.0090174	0.060413	FALSE	85.7417	369.846	-2.1089	9.93e-06	0.00024015	DOWN	sp|Q5N800|NYC1_ORYSJ	Probable chlorophyll(ide) b reductase NYC1, chloroplastic OS=Oryza sativa subsp. japonica GN=NYC1 PE=1 SV=1	NYC1
MD02G1046500	0.455467	0	0	0.0695332	0	10.522	#NAME?	0.010627	0.10021	FALSE	0	11.8175	#NAME?	0.0028334	0.026083	DOWN	2.18926	10.9473	-2.3221	0.1572	0.47612	FALSE	--	--	0
MD15G1146500	1.11875	0.0917351	0.159665	0.0700522	6.68938	57.3487	-3.0998	0.00041804	0.011034	DOWN	11.8128	64.3758	-2.4462	0.0012464	0.014101	DOWN	5.0084	59.6645	-3.5745	4.34e-05	0.00084141	DOWN	sp|O22822|U74F2_ARATH	UDP-glycosyltransferase 74F2 OS=Arabidopsis thaliana GN=UGT74F2 PE=1 SV=1	UGT74F2
MD02G1047000	2.16308	0.561204	0.922112	0.074511	71.4206	199.379	-1.4811	0.041052	0.23035	FALSE	122.006	223.999	-0.87654	0.20163	0.48767	FALSE	9.57992	208.101	-4.4411	8.26e-09	4.75e-07	DOWN	sp|Q940Y8|KN13B_ARATH	Kinesin-like protein KIN-13B OS=Arabidopsis thaliana GN=KIN13B PE=1 SV=1	KIN13B
MD02G1047200	51.9943	150.6	146.909	68.3223	7275.67	1615.91	2.1707	9.16e-05	0.0035812	UP	6931.45	1814.41	1.9337	0.0016697	0.017618	UP	3085.66	1680.56	0.87664	0.17655	0.50969	FALSE	--	--	0
MD02G1047300	0.744651	1.947	2.12677	4.006	112.995	25.2149	2.1639	0.083358	0.34099	FALSE	117.834	28.3246	2.0566	0.40199	0.7207	FALSE	205.906	26.303	2.9687	0.0028754	0.02655	UP	sp|Q9SXB8|Y1133_ARATH	G-type lectin S-receptor-like serine/threonine-protein kinase At1g11330 OS=Arabidopsis thaliana GN=At1g11330 PE=2 SV=3	At1g11330
MD02G1047400	1.22374	3.07126	3.56007	4.48399	109.407	25.4129	2.1061	0.092025	0.35983	FALSE	121.774	28.5494	2.0927	0.42604	0.74221	FALSE	140.433	26.4989	2.4059	0.0014345	0.015132	UP	--	--	0
MD02G1047500	0.0797359	0.21637	0.505519	0.462145	31.8452	6.86126	2.2145	0.10197	0.37911	FALSE	71.5123	7.70715	3.2139	0.26809	0.57652	FALSE	59.4878	7.14193	3.0582	4.95e-05	0.00093817	UP	sp|O64793|Y1675_ARATH	G-type lectin S-receptor-like serine/threonine-protein kinase At1g67520 OS=Arabidopsis thaliana GN=At1g67520 PE=2 SV=3	At1g67520
MD02G1047600	0.014384	0.0586933	0.730321	1.24495	8.27888	1.25679	2.7197	0.26209	0.6143	FALSE	106.328	1.41319	6.2334	0.14455	0.39811	FALSE	159.777	1.31728	6.9224	4.11e-10	3.46e-08	UP	sp|O64793|Y1675_ARATH	G-type lectin S-receptor-like serine/threonine-protein kinase At1g67520 OS=Arabidopsis thaliana GN=At1g67520 PE=2 SV=3	At1g67520
MD02G1049200	0	0.0452446	0.0196233	0	0.783947	0	Inf	0.76452	0.97748	FALSE	0.371577	0	Inf	0.96342	1	FALSE	0	0	NA	NA	NA	NA	--	--	0
MD02G1050200	160.867	134.318	60.1806	84.7487	5873.64	4285.55	0.45478	0.5806	0.88285	FALSE	2421.91	4812.05	-0.99051	0.0023493	0.022643	DOWN	3359.74	4459.46	-0.40852	0.21981	0.57585	FALSE	sp|Q9LV58|MBF1C_ARATH	Multiprotein-bridging factor 1c OS=Arabidopsis thaliana GN=MBF1C PE=1 SV=1	MBF1C
MD02G1054500	9.13346	5.81926	5.34026	1.87789	235.101	237.385	-0.013944	0.86299	1	FALSE	208.338	266.585	-0.35567	0.36005	0.68068	FALSE	69.2695	247.216	-1.8355	0.00028249	0.0040637	DOWN	sp|Q40392|TMVRN_NICGU	TMV resistance protein N OS=Nicotiana glutinosa GN=N PE=1 SV=1	N
MD02G1056200	3.68884	4.16089	5.45699	8.58267	646.321	340.789	0.92337	0.27026	0.62415	FALSE	796.051	382.729	1.0565	0.44409	0.75772	FALSE	1175.68	354.78	1.7285	6.93e-05	0.0012534	UP	sp|Q9LHF5|VIL1_ARATH	VIN3-like protein 1 OS=Arabidopsis thaliana GN=VIL1 PE=1 SV=1	VIL1
MD02G1056600	0.105238	0.0245183	0	0.0180373	3.81036	9.60666	-1.3341	0.33766	0.69241	FALSE	0	10.7901	#NAME?	0.0048241	0.03861	DOWN	2.65396	10.0116	-1.9155	0.14118	0.44655	FALSE	sp|C6L7U1|LIN1_LOTJA	Putative E3 ubiquitin-protein ligase LIN-1 OS=Lotus japonicus GN=CERBERUS PE=2 SV=2	CERBERUS
MD15G1146700	15.7785	2.1909	1.36793	1.41319	197.78	1008.55	-2.3503	5.58e-05	0.0025096	DOWN	126.476	1132.42	-3.1625	4.02e-16	1.82e-13	DOWN	124.613	1049.26	-3.0738	6.2e-11	6.42e-09	DOWN	sp|O22822|U74F2_ARATH	UDP-glycosyltransferase 74F2 OS=Arabidopsis thaliana GN=UGT74F2 PE=1 SV=1	UGT74F2
MD02G1057200	194.785	40.573	33.142	22.6554	3594.47	11254.9	-1.6467	0.0010726	0.021573	DOWN	2813.01	12637.9	-2.1676	3.25e-05	0.0007642	DOWN	1807.67	11724.6	-2.6973	1.56e-05	0.00035374	DOWN	sp|Q9ZSY8|IAA27_ARATH	Auxin-responsive protein IAA27 OS=Arabidopsis thaliana GN=IAA27 PE=1 SV=1	IAA27
MD02G1058400	42.598	14.0416	17.3158	11.3687	1072.2	2291.87	-1.096	0.057824	0.2781	FALSE	1335.53	2573.25	-0.94618	0.040486	0.17392	FALSE	854.185	2382.56	-1.4799	0.0010208	0.011569	DOWN	sp|Q8W593|LGUC_ARATH	Probable lactoylglutathione lyase, chloroplastic OS=Arabidopsis thaliana GN=At1g67280 PE=1 SV=1	At1g67280
MD02G1058500	15.0685	50.7407	26.5266	19.7133	11297.1	1932.31	2.5475	0.18096	0.51143	FALSE	5240.91	2169.86	1.2722	0.0056997	0.043459	UP	3666.92	2011.69	0.86616	0.026357	0.14333	FALSE	sp|Q9SL76|P2C19_ARATH	Protein phosphatase 2C and cyclic nucleotide-binding/kinase domain-containing protein OS=Arabidopsis thaliana GN=At2g20050/At2g20040 PE=2 SV=2	At2g20050/At2g20040
MD02G1058700	0.00581022	2.7112	2.98615	6.40439	198.448	0.257096	9.5922	0.00079444	0.017398	UP	218.114	0.289081	9.5594	0.039847	0.17191	FALSE	433.65	0.27088	10.645	5.52e-07	1.93e-05	UP	sp|Q5XF85|ATL42_ARATH	E3 ubiquitin-protein ligase ATL42 OS=Arabidopsis thaliana GN=ATL42 PE=1 SV=2	ATL42
MD10G1111300	0.150303	0.750588	2.23973	7.82416	73.2294	8.79756	3.0572	0.060545	0.28562	FALSE	206.577	9.89233	4.3842	0.039141	0.16986	FALSE	687.004	9.22099	6.2193	2.5e-11	2.79e-09	UP	sp|Q9SYK9|U74E2_ARATH	UDP-glycosyltransferase 74E2 OS=Arabidopsis thaliana GN=UGT74E2 PE=1 SV=1	UGT74E2
MD02G1060200	0.844462	0.121237	0.211729	0.0408504	5.45239	23.7996	-2.126	0.033271	0.20314	FALSE	8.55664	26.7171	-1.6426	0.05673	0.21754	FALSE	1.6669	24.7684	-3.8933	0.0010536	0.011843	DOWN	sp|Q9LYD3|DREB3_ARATH	Dehydration-responsive element-binding protein 3 OS=Arabidopsis thaliana GN=DREB3 PE=2 SV=1	DREB3
MD15G1357700	5.85272	1.20142	2.48285	3.7126	115.589	394.82	-1.7722	0.0032473	0.045624	DOWN	243.368	443.49	-0.86576	0.029894	0.14209	FALSE	359.248	411.538	-0.19605	0.77137	0.99034	FALSE	sp|Q9SYK9|U74E2_ARATH	UDP-glycosyltransferase 74E2 OS=Arabidopsis thaliana GN=UGT74E2 PE=1 SV=1	UGT74E2
MD02G1062300	15.0063	35.2502	18.4378	84.6443	380.278	93.0038	2.0317	0.14282	0.45318	FALSE	182.237	104.527	0.80194	0.54769	0.8406	FALSE	797.378	97.0708	3.0382	0.0023973	0.022843	UP	--	--	0
MD02G1062600	60.5591	98.0218	83.1407	56.1173	7976.88	3081.47	1.3722	0.014404	0.12117	FALSE	6398.89	3460.67	0.88677	0.0068597	0.049648	UP	4170.22	3207.07	0.37887	0.34481	0.72487	FALSE	--	--	0
MD02G1063200	4.23884	9.83047	7.36392	7.1973	956.266	255.403	1.9046	0.00072333	0.016296	UP	685.239	286.88	1.2562	0.014929	0.087157	FALSE	638.286	266.294	1.2612	0.0036508	0.032136	UP	sp|Q40392|TMVRN_NICGU	TMV resistance protein N OS=Nicotiana glutinosa GN=N PE=1 SV=1	N
MD02G1063300	0.433544	1.22335	0.998645	1.82253	152.449	32.5703	2.2267	0.01106	0.1027	FALSE	114.835	36.5952	1.6498	0.01178	0.073727	FALSE	201.782	34.0286	2.568	2.79e-06	8.02e-05	UP	sp|Q40392|TMVRN_NICGU	TMV resistance protein N OS=Nicotiana glutinosa GN=N PE=1 SV=1	N
MD02G1063800	0.990133	1.73791	1.47063	2.59902	362.708	126.007	1.5253	0.021884	0.15741	FALSE	288.701	141.551	1.0283	0.076167	0.26303	FALSE	491.091	131.43	1.9017	4.6e-05	0.00088406	UP	sp|Q40392|TMVRN_NICGU	TMV resistance protein N OS=Nicotiana glutinosa GN=N PE=1 SV=1	N
MD02G1064200	25.8211	4.88116	9.05325	2.86519	207.44	752.944	-1.8598	0.0026735	0.040385	DOWN	394.369	845.767	-1.1007	0.026685	0.13118	FALSE	115.613	785.769	-2.7648	0.00030238	0.004301	DOWN	--	--	0
MD02G1064900	30.2046	48.8098	49.6649	49.2189	3621.91	1391.3	1.3803	0.014854	0.12349	FALSE	3424.65	1562.7	1.1319	0.00075518	0.0095067	UP	3320.12	1449.22	1.196	0.003224	0.029122	UP	sp|Q4W946|ENCD_ASPFU	2-oxoglutarate-Fe(II) type oxidoreductase OS=Neosartorya fumigata (strain ATCC MYA-4609 / Af293 / CBS 101355 / FGSC A1100) GN=encD PE=1 SV=2	encD
MD02G1065300	4.65335	4.86428	7.10537	5.26735	578.918	365.959	0.66168	0.20514	0.54418	FALSE	837.25	411.025	1.0264	0.0032515	0.028932	UP	605.531	381.228	0.66755	0.11278	0.38883	FALSE	sp|Q10181|YAW6_SCHPO	Uncharacterized protein C3F10.06c OS=Schizosaccharomyces pombe (strain 972 / ATCC 24843) GN=SPAC3F10.06c PE=4 SV=1	SPAC3F10.06c
MD02G1066500	26.4187	163.694	85.283	121.064	19609.2	1858.24	3.3995	0.010497	0.099422	FALSE	9399.61	2087.25	2.171	0.016695	0.094347	FALSE	12765.8	1935.33	2.7216	1.99e-05	0.00043487	UP	sp|Q9SEK3|HXK1_SPIOL	Hexokinase-1 OS=Spinacia oleracea GN=HXK1 PE=2 SV=1	HXK1
MD02G1066700	0.346294	1.65797	5.37587	11.2094	124.933	18.3652	2.7661	0.020517	0.15156	FALSE	435.668	20.6329	4.4002	8.45e-07	3.69e-05	UP	898.051	19.1158	5.554	5.52e-07	1.93e-05	UP	sp|Q9SZE2|DTX51_ARATH	Protein DETOXIFICATION 51 OS=Arabidopsis thaliana GN=DTX51 PE=2 SV=1	DTX51
MD02G1067200	42.5976	127.088	94.7674	46.8939	24635.6	5095	2.2736	0.001408	0.026166	UP	17076.9	5721.73	1.5775	3.18e-06	0.00011301	UP	8123.61	5310.06	0.61339	0.1328	0.43024	FALSE	sp|Q9M1S8|GCP2_ARATH	Probable glutamate carboxypeptidase 2 OS=Arabidopsis thaliana GN=AMP1 PE=1 SV=3	AMP1
MD02G1067700	5.01493	0.921383	1.56126	1.29302	56.4329	215.111	-1.9305	0.0018792	0.031863	DOWN	98.5571	241.548	-1.2933	0.0020418	0.020384	DOWN	79.775	223.777	-1.4881	0.0025746	0.024174	DOWN	sp|Q9FJU9|E1313_ARATH	Glucan endo-1,3-beta-glucosidase 13 OS=Arabidopsis thaliana GN=At5g56590 PE=1 SV=1	At5g56590
MD02G1067800	6.17777	1.26627	1.90864	1.88964	45.0174	152.48	-1.7601	0.0054445	0.064879	FALSE	68.6625	171.241	-1.3184	0.003657	0.031586	DOWN	67.4768	158.705	-1.2339	0.015939	0.099501	FALSE	sp|Q9FJU9|E1313_ARATH	Glucan endo-1,3-beta-glucosidase 13 OS=Arabidopsis thaliana GN=At5g56590 PE=1 SV=1	At5g56590
MD02G1068900	5.12244	0.948434	1.54955	5.70209	98.5318	332.594	-1.7551	0.0015683	0.028125	DOWN	154.024	373.435	-1.2777	0.0060938	0.045552	DOWN	551.021	345.723	0.67249	0.34126	0.72093	FALSE	sp|Q94AA4|PFKA3_ARATH	ATP-dependent 6-phosphofructokinase 3 OS=Arabidopsis thaliana GN=PFK3 PE=1 SV=1	PFK3
MD00G1055100	0.722819	0.686349	0.146643	0.266283	63.0544	36.312	0.79615	0.79927	0.99282	FALSE	11.655	40.7921	-1.8073	0.0060429	0.045279	DOWN	20.4041	37.8114	-0.88997	0.1502	0.46371	FALSE	sp|Q9SCP6|U73D1_ARATH	UDP-glycosyltransferase 73D1 OS=Arabidopsis thaliana GN=UGT73D1 PE=3 SV=1	UGT73D1
MD02G1069300	0.0110478	1.47177	1.14951	5.24235	118.274	0.485505	7.9284	0.013238	0.11511	FALSE	84.69	0.545947	7.2773	0.10576	0.32673	FALSE	371.247	0.504645	9.5229	0.0055869	0.044655	UP	sp|O82200|MIOX2_ARATH	Inositol oxygenase 2 OS=Arabidopsis thaliana GN=MIOX2 PE=2 SV=2	MIOX2
MD02G1069500	77.4419	32.942	10.8648	8.56087	2281.29	3208.72	-0.49215	0.29461	0.64929	FALSE	682.682	3602.06	-2.3995	6.33e-06	0.00019846	DOWN	499.162	3337.27	-2.7411	4.16e-06	0.00011267	DOWN	sp|O82199|C3H20_ARATH	Zinc finger CCCH domain-containing protein 20 OS=Arabidopsis thaliana GN=At2g19810 PE=2 SV=1	At2g19810
MD02G1069700	11.8887	3.51887	4.49345	1.73364	254.983	576.666	-1.1773	0.034374	0.20721	FALSE	328.3	647.621	-0.98014	0.0069523	0.050184	FALSE	120.053	600.543	-2.3226	4.53e-07	1.64e-05	DOWN	sp|Q7XA40|RGA3_SOLBU	Putative disease resistance protein RGA3 OS=Solanum bulbocastanum GN=RGA3 PE=2 SV=2	RGA3
MD02G1070300	7.7905	4.74189	4.34041	2.44169	839.681	879.529	-0.06689	0.84984	1	FALSE	738.682	987.686	-0.4191	0.23519	0.53409	FALSE	397.171	915.441	-1.2047	0.0052887	0.042703	DOWN	sp|Q7XBQ9|RGA2_SOLBU	Disease resistance protein RGA2 OS=Solanum bulbocastanum GN=RGA2 PE=1 SV=1	RGA2
MD02G1070800	5.14117	1.73667	2.68578	1.42461	189.087	394.475	-1.0609	0.094682	0.36491	FALSE	306.976	442.991	-0.52915	0.1682	0.43762	FALSE	154.522	410.45	-1.4094	0.0032241	0.029122	DOWN	sp|Q7XBQ9|RGA2_SOLBU	Disease resistance protein RGA2 OS=Solanum bulbocastanum GN=RGA2 PE=1 SV=1	RGA2
MD02G1070900	7.71179	2.58852	2.62821	0.851865	242.785	476.752	-0.97356	0.081374	0.33655	FALSE	241.976	535.424	-1.1458	0.0021843	0.021398	DOWN	73.6837	496.274	-2.7517	1.51e-08	8.12e-07	DOWN	sp|Q7XA40|RGA3_SOLBU	Putative disease resistance protein RGA3 OS=Solanum bulbocastanum GN=RGA3 PE=2 SV=2	RGA3
MD02G1071400	7.27322	4.89577	4.71891	1.62889	1046.63	1033.91	0.017639	0.90071	1	FALSE	1014.31	1161.07	-0.19496	0.59435	0.87307	FALSE	325.353	1076.37	-1.7261	0.00013879	0.0022444	DOWN	sp|Q7XA40|RGA3_SOLBU	Putative disease resistance protein RGA3 OS=Solanum bulbocastanum GN=RGA3 PE=2 SV=2	RGA3
MD02G1071700	41.6714	16.663	21.2653	11.4145	472.965	801.977	-0.76183	0.17537	0.50294	FALSE	614.07	900.653	-0.55257	0.12079	0.35609	FALSE	312.108	834.499	-1.4189	0.0016078	0.016598	DOWN	sp|P34091|RL6_MESCR	60S ribosomal protein L6 OS=Mesembryanthemum crystallinum GN=RPL6 PE=2 SV=1	RPL6
MD02G1071800	6.43488	20.4094	17.7823	18.4243	3215.46	618.122	2.3791	0.0027981	0.041474	UP	2670.82	694.272	1.9437	0.012843	0.078372	FALSE	2643.68	643.831	2.0378	0.0071748	0.054286	FALSE	sp|C0LGR6|Y4291_ARATH	Probable LRR receptor-like serine/threonine-protein kinase At4g29180 OS=Arabidopsis thaliana GN=At4g29180 PE=2 SV=2	At4g29180
MD02G1071900	5.53134	15.3271	11.3583	9.86597	4065.22	903.29	2.1701	0.00055289	0.013501	UP	2830.9	1014.35	1.4807	1.86e-05	0.00048693	UP	2370.54	940.093	1.3343	0.018851	0.112	FALSE	sp|Q7XA40|RGA3_SOLBU	Putative disease resistance protein RGA3 OS=Solanum bulbocastanum GN=RGA3 PE=2 SV=2	RGA3
MD02G1073600	3.21646	0.839841	0.999729	1.90336	74.8328	177.769	-1.2483	0.031956	0.19823	FALSE	82.1663	199.645	-1.2808	0.0019856	0.01997	DOWN	156.084	185.039	-0.2455	0.50698	0.86158	FALSE	sp|Q9XG80|PLA21_ORYSJ	Probable phospholipase A2 homolog 1 OS=Oryza sativa subsp. japonica GN=PLA2-I PE=2 SV=1	PLA2-I
MD14G1111500	0.688313	4.61296	15.5199	45.842	533.245	47.382	3.4924	0.056428	0.27453	FALSE	1769.84	53.2798	5.0539	0.15981	0.42337	FALSE	4720.92	49.3848	6.5789	4.5e-20	2.44e-17	UP	sp|P31531|1A1C_SOYBN	1-aminocyclopropane-1-carboxylate synthase OS=Glycine max GN=ACS1 PE=2 SV=1	ACS1
MD02G1074400	37.3844	4.44679	7.83203	15.8236	296.217	1622.24	-2.4533	1.38e-05	0.0008798	DOWN	514.486	1822.16	-1.8244	1.15e-06	4.86e-05	DOWN	1007.35	1687.94	-0.7447	0.059572	0.25445	FALSE	--	--	0
MD02G1075000	14.0939	22.3256	21.4215	10.1918	1525.38	629.159	1.2777	0.012873	0.11304	FALSE	1448.61	706.517	1.0359	0.0024194	0.023107	UP	664.315	654.959	0.020463	0.96999	1	FALSE	sp|O23969|SF21_HELAN	Pollen-specific protein SF21 OS=Helianthus annuus GN=SF21 PE=2 SV=1	SF21
MD02G1075200	6.7287	3.56889	3.64506	1.09494	557.34	684.597	-0.2967	0.53992	0.85603	FALSE	552.476	768.714	-0.47653	0.21027	0.49991	FALSE	159.556	712.499	-2.1588	1.57e-06	4.84e-05	DOWN	sp|Q7XA40|RGA3_SOLBU	Putative disease resistance protein RGA3 OS=Solanum bulbocastanum GN=RGA3 PE=2 SV=2	RGA3
MD07G1079100	7.00335	0.685136	1.4897	2.37033	70.9168	504.305	-2.8301	2.18e-06	0.00022485	DOWN	156.854	566.399	-1.8524	3.42e-05	0.00079819	DOWN	251.792	524.379	-1.0584	0.010448	0.072161	FALSE	sp|Q9ZQ99|U73C1_ARATH	UDP-glycosyltransferase 73C1 OS=Arabidopsis thaliana GN=UGT73C1 PE=2 SV=1	UGT73C1
MD02G1075600	3.11513	0.839085	1.66837	0.266671	18.7482	51.0008	-1.4438	0.080548	0.33487	FALSE	41.6654	57.2823	-0.45924	0.7107	0.94642	FALSE	6.40353	53.1525	-3.0532	9.98e-05	0.0017058	DOWN	--	--	0
MD12G1104300	1.28775	0.861504	2.1727	4.08471	67.2776	67.6944	-0.0089105	0.90591	1	FALSE	162.892	76.0749	1.0984	0.26631	0.57464	FALSE	315.416	70.8155	2.1551	3.3e-05	0.0006663	UP	sp|Q9ZQ99|U73C1_ARATH	UDP-glycosyltransferase 73C1 OS=Arabidopsis thaliana GN=UGT73C1 PE=2 SV=1	UGT73C1
MD02G1076100	14.9772	5.76654	8.69328	3.52016	709.187	1332.34	-0.90973	0.13095	0.43334	FALSE	1133.32	1496.2	-0.40075	0.32341	0.64054	FALSE	444.057	1386.37	-1.6425	0.00019297	0.0029489	DOWN	sp|Q9LV48|PERK1_ARATH	Proline-rich receptor-like protein kinase PERK1 OS=Arabidopsis thaliana GN=PERK1 PE=2 SV=1	PERK1
MD02G1078100	2.63645	5.53718	5.29742	4.53587	466.305	136.505	1.7723	0.0040255	0.053127	FALSE	415.336	153.305	1.4379	0.00018858	0.0032217	UP	345.122	142.009	1.2811	0.0050501	0.04114	UP	--	--	0
MD02G1078200	0.751716	0.0482706	0.0163459	0.0254803	3.84256	36.1351	-3.2333	0.0036331	0.04972	DOWN	1.05112	40.5542	-5.2699	0.00023047	0.0037728	DOWN	1.87429	37.4291	-4.3197	0.00058816	0.007387	DOWN	sp|O65717|CNGC1_ARATH	Cyclic nucleotide-gated ion channel 1 OS=Arabidopsis thaliana GN=CNGC1 PE=1 SV=1	CNGC1
MD02G1078400	0.912405	0.0391027	0.0735823	0.0293572	3.40228	44.6428	-3.7139	0.0010555	0.021295	DOWN	5.15264	50.116	-3.2819	0.0028867	0.026419	DOWN	2.08938	46.2713	-4.469	0.00035835	0.0049353	DOWN	sp|O65717|CNGC1_ARATH	Cyclic nucleotide-gated ion channel 1 OS=Arabidopsis thaliana GN=CNGC1 PE=1 SV=1	CNGC1
MD02G1079100	0.0341118	0.182798	2.31838	1.11938	8.45935	0.993377	3.0901	0.097448	0.37054	FALSE	99.1241	1.11599	6.4728	0.00036891	0.0054405	UP	45.6248	1.03746	5.4587	0.0073485	0.055244	FALSE	--	--	0
MD02G1079200	28.2477	163.251	365.63	372.739	26053.3	3062.42	3.0887	1.09e-07	2.32e-05	UP	60676.4	3440.49	4.1405	0.00015854	0.0028086	UP	58906.3	3202.56	4.2011	8.16e-22	5.32e-19	UP	sp|P48981|BGAL_MALDO	Beta-galactosidase OS=Malus domestica PE=1 SV=1	1
MD02G1079400	1.48843	0.202049	0.230601	0.124666	14.6585	84.9773	-2.5353	0.015593	0.12738	FALSE	19.3678	95.4159	-2.3006	0.0081738	0.056337	FALSE	10.2021	88.5977	-3.1184	0.0016973	0.017304	DOWN	sp|Q9SU79|PAO5_ARATH	Probable polyamine oxidase 5 OS=Arabidopsis thaliana GN=PAO5 PE=2 SV=1	PAO5
MD02G1080400	14.5003	9.30607	0.489815	1.72983	633.599	550.498	0.20283	0.9753	1	FALSE	27.1009	618.331	-4.512	0.0011819	0.01351	DOWN	94.011	571.534	-2.6039	0.026134	0.14246	FALSE	--	--	0
MD02G1080900	3.90298	0.393165	1.25709	1.62602	17.6205	129.079	-2.8729	5.31e-05	0.00242	DOWN	58.3527	145.01	-1.3133	0.052598	0.20725	FALSE	75.4025	134.544	-0.83539	0.28889	0.66515	FALSE	sp|Q07379|YD057_YEAST	Putative uncharacterized protein YDL057W OS=Saccharomyces cerevisiae (strain ATCC 204508 / S288c) GN=YDL057W PE=4 SV=1	YDL057W
MD15G1028800	0.933308	6.35297	3.04868	5.33021	637.408	53.7281	3.5685	0.044109	0.23994	FALSE	263.554	60.3763	2.126	0.00085061	0.010437	UP	449.982	56.0842	3.0042	1.62e-10	1.52e-08	UP	sp|Q94A84|U72E1_ARATH	UDP-glycosyltransferase 72E1 OS=Arabidopsis thaliana GN=UGT72E1 PE=1 SV=1	UGT72E1
MD02G1081700	7.94894	0.898516	2.37577	1.7639	77.0775	499.815	-2.697	8.67e-06	0.00063352	DOWN	212.738	561.276	-1.3996	0.0005289	0.0071743	DOWN	156.379	519.999	-1.7335	0.00022404	0.0033637	DOWN	sp|Q9ZUP2|RECA3_ARATH	DNA repair protein recA homolog 3, mitochondrial OS=Arabidopsis thaliana GN=At2g19490 PE=2 SV=2	At2g19490
MD11G1076600	38.2935	67.7202	110.518	360.077	6063.61	2057.37	1.5594	0.084987	0.34485	FALSE	9130.72	2310.64	1.9824	0.031325	0.1467	FALSE	28919.2	2142.98	3.7543	6.52e-09	3.92e-07	UP	sp|D3UAG2|U71K2_PYRCO	UDP-glycosyltransferase 71K2 OS=Pyrus communis GN=UGT71K2 PE=1 SV=1	UGT71K2
MD02G1082200	21.427	47.6611	47.1419	76.7614	2760	735.444	1.908	0.065074	0.29762	FALSE	2553.21	826.128	1.6279	0.20542	0.49274	FALSE	3969.82	766.734	2.3723	0.0024682	0.023383	UP	--	--	0
MD02G1082300	0.870993	12.86	38.7252	56.0887	1463.94	58.0832	4.6556	0.0081296	0.083603	FALSE	4286.03	65.2555	6.0374	0.13563	0.38273	FALSE	5738.68	60.5318	6.5669	2.09e-05	0.00045213	UP	sp|O82645|IQM1_ARATH	IQ domain-containing protein IQM1 OS=Arabidopsis thaliana GN=IQM1 PE=1 SV=1	IQM1
MD11G1076800	4.66821	5.97717	12.6664	49.316	987.748	459.344	1.1046	0.21755	0.55983	FALSE	1899.08	516.048	1.8797	0.035623	0.15979	FALSE	7215.76	478.843	3.9135	1.07e-11	1.33e-09	UP	sp|D3UAG2|U71K2_PYRCO	UDP-glycosyltransferase 71K2 OS=Pyrus communis GN=UGT71K2 PE=1 SV=1	UGT71K2
MD11G1076200	19.1041	27.0805	44.575	114.989	2544.99	1080.27	1.2363	0.1037	0.38286	FALSE	3867.16	1213.12	1.6725	0.024082	0.12194	FALSE	9579.05	1124.37	3.0908	5.19e-13	8.67e-11	UP	sp|D3UAG0|U71K1_MALDO	UDP-glycosyltransferase 71K1 OS=Malus domestica GN=UGT71K1 PE=1 SV=1	UGT71K1
MD09G1140700	24.0131	64.918	54.1896	113.12	5327.79	1152.9	2.2083	0.079755	0.33313	FALSE	4036.57	1295.45	1.6397	0.03517	0.1587	FALSE	8102.69	1202.91	2.7519	1.8e-06	5.42e-05	UP	sp|D3THI6|U7A15_MALDO	UDP-glycosyltransferase 71A15 OS=Malus domestica GN=UGT71A15 PE=1 SV=1	UGT71A15
MD09G1141100	122.206	318.853	226.605	444.417	26364.6	5869.09	2.1674	0.10893	0.3938	FALSE	16971.9	6594.16	1.3639	0.10293	0.32069	FALSE	31858.9	6121.47	2.3797	7.75e-06	0.00019347	UP	sp|D3THI6|U7A15_MALDO	UDP-glycosyltransferase 71A15 OS=Malus domestica GN=UGT71A15 PE=1 SV=1	UGT71A15
MD02G1084100	39.451	121.072	93.3668	51.9324	18083.5	3661.03	2.3044	3.39e-05	0.0017261	UP	13210.8	4111.29	1.6841	0.00015186	0.0027091	UP	7064.24	3809.8	0.89082	0.036535	0.18147	FALSE	sp|Q8S8S7|PUB34_ARATH	U-box domain-containing protein 34 OS=Arabidopsis thaliana GN=PUB34 PE=3 SV=1	PUB34
MD02G1084300	0.519091	0.0205865	0.0311076	0.00856897	0.816153	16.2412	-4.3147	0.0086023	0.086864	FALSE	1.48631	18.2403	-3.6173	0.0053766	0.041745	DOWN	0.364877	16.9204	-5.5352	0.0016895	0.017236	DOWN	sp|Q9SKD7|CNGC3_ARATH	Probable cyclic nucleotide-gated ion channel 3 OS=Arabidopsis thaliana GN=CNGC3 PE=2 SV=2	CNGC3
MD09G1141500	15.373	39.8426	30.0145	62.8014	3283.44	739.552	2.1505	0.084602	0.34382	FALSE	2249.65	830.971	1.4368	0.12615	0.36495	FALSE	4512.15	771.353	2.5484	2.22e-06	6.54e-05	UP	sp|D3THI6|U7A15_MALDO	UDP-glycosyltransferase 71A15 OS=Malus domestica GN=UGT71A15 PE=1 SV=1	UGT71A15
MD02G1084600	0.51908	98.389	17.7975	50.5558	13193.1	37.6618	8.4525	0.028777	0.18593	FALSE	2095.59	42.3195	5.6299	0.053436	0.20924	FALSE	5649.68	39.3184	7.1668	9.93e-05	0.0017001	UP	sp|Q9LNP9|P2C07_ARATH	Protein phosphatase 2C 7 OS=Arabidopsis thaliana GN=HAB2 PE=1 SV=2	HAB2
MD02G1084700	34.3335	55.1413	14.2388	10.9664	5298.59	1826.9	1.5362	0.52923	0.848	FALSE	1151.24	2051.68	-0.83362	0.01138	0.071675	FALSE	847.21	1900.57	-1.1656	0.004711	0.03905	DOWN	sp|Q9S7U9|M2K2_ARATH	Mitogen-activated protein kinase kinase 2 OS=Arabidopsis thaliana GN=MKK2 PE=1 SV=2	MKK2
MD02G1085200	14.8876	53.0822	25.7125	29.8552	3561.35	566.348	2.6527	0.19924	0.53708	FALSE	1492.62	636.093	1.2305	0.0075872	0.053461	FALSE	1673.57	589.594	1.5051	0.00035411	0.0048876	UP	--	--	0
MD02G1085400	0.478976	0.228899	0.0476409	0.0525643	23.1066	27.9184	-0.27291	0.55202	0.86335	FALSE	4.32775	31.3496	-2.8568	0.0015737	0.016815	DOWN	4.68574	29.0482	-2.6321	0.0041219	0.035219	DOWN	--	--	0
MD02G1085700	11.6101	2.75275	3.52778	5.59825	214.754	583.946	-1.4431	0.0085528	0.086577	FALSE	267.906	655.881	-1.2917	0.00023623	0.0038494	DOWN	410.368	607.668	-0.56636	0.1807	0.5163	FALSE	sp|O94673|YG75_SCHPO	Uncharacterized membrane protein C776.05 OS=Schizosaccharomyces pombe (strain 972 / ATCC 24843) GN=SPBC776.05 PE=4 SV=2	SPBC776.05
MD02G1085900	7.87769	11.5189	10.8477	12.5993	1293.62	546.996	1.2418	0.028346	0.18417	FALSE	1160.01	614.309	0.9171	0.070374	0.25023	FALSE	1290.01	568.86	1.1812	0.0056186	0.044869	UP	sp|Q8GYH5|BAD1_ARATH	Ankyrin repeat-containing protein BDA1 OS=Arabidopsis thaliana GN=BAD1 PE=1 SV=1	BAD1
MD02G1086100	12.8196	4.27297	4.67666	4.64023	343.475	669.606	-0.96311	0.064116	0.2948	FALSE	361.472	751.862	-1.0566	0.0035611	0.030958	DOWN	349.752	696.315	-0.99341	0.022295	0.1268	FALSE	sp|P54069|BEM46_SCHPO	Protein bem46 OS=Schizosaccharomyces pombe (strain 972 / ATCC 24843) GN=bem46 PE=2 SV=3	bem46
MD02G1086500	20.1923	1.35692	0.795371	1.99124	127.259	1306.58	-3.36	3.76e-05	0.0018607	DOWN	75.4704	1466.5	-4.2803	9.9e-07	4.24e-05	DOWN	176.62	1358.16	-2.9429	0.00047375	0.0061824	DOWN	sp|Q8GZ92|BRXL4_ARATH	Protein Brevis radix-like 4 OS=Arabidopsis thaliana GN=BRXL4 PE=2 SV=1	BRXL4
MD02G1086600	1.50729	0.225589	0.24829	0.17869	11.7698	61.3797	-2.3827	0.0046759	0.058579	FALSE	14.8066	68.9224	-2.2187	0.0014139	0.015499	DOWN	9.92369	63.9642	-2.6883	0.00093571	0.010786	DOWN	sp|Q9M2B3|BIG1C_ARATH	Protein BIG GRAIN 1-like C OS=Arabidopsis thaliana GN=At3g42800 PE=2 SV=1	At3g42800
MD02G1086900	4.56564	0.38038	0.203797	0.123323	48.9283	420.896	-3.1047	3.82e-07	5.95e-05	DOWN	28.2135	472.525	-4.0659	1.16e-19	1.26e-16	DOWN	16.3406	437.275	-4.742	1.16e-18	5.36e-16	DOWN	sp|Q9LYG9|MSL10_ARATH	Mechanosensitive ion channel protein 10 OS=Arabidopsis thaliana GN=MSL10 PE=1 SV=1	MSL10
MD02G1087000	0.0997274	0.113265	0.307283	0.995479	15.9124	8.76134	0.86092	0.44331	0.78698	FALSE	43.5374	9.84347	2.145	0.32359	0.64063	FALSE	125.911	9.16799	3.7796	0.00030496	0.0043287	UP	sp|Q9LYG9|MSL10_ARATH	Mechanosensitive ion channel protein 10 OS=Arabidopsis thaliana GN=MSL10 PE=1 SV=1	MSL10
MD02G1087100	9.05352	2.99028	2.45792	0.979427	58.2943	114.45	-0.97329	0.11507	0.40477	FALSE	46.3187	128.457	-1.4716	0.015913	0.091256	FALSE	17.9739	118.748	-2.7239	0.00010888	0.0018359	DOWN	--	--	0
MD02G1090200	1.27976	0.0727615	0.125758	0.270949	7.09789	95.7976	-3.7545	3.05e-06	0.00029168	DOWN	13.5113	107.613	-2.9936	2.51e-07	1.31e-05	DOWN	28.2539	99.8405	-1.8212	0.0038708	0.033591	DOWN	sp|O74999|RAD7_SCHPO	DNA repair protein rhp7 OS=Schizosaccharomyces pombe (strain 972 / ATCC 24843) GN=rhp7 PE=3 SV=1	rhp7
MD16G1064500	0.105084	0.152003	0.183324	0.584003	11.2674	4.37064	1.3662	0.64994	0.92226	FALSE	11.1043	4.91438	1.176	0.40311	0.72196	FALSE	35.966	4.60496	2.9654	0.00071695	0.0086989	UP	sp|I1L3T1|708D1_SOYBN	UDP-glycosyltransferase 708D1 OS=Glycine max GN=UGT708D1 PE=1 SV=1	UGT708D1
MD02G1091400	2.26409	0.137878	0.235674	0.388675	8.68783	104.042	-3.582	6.45e-06	0.0005077	DOWN	15.7375	116.861	-2.8925	3.54e-07	1.76e-05	DOWN	24.898	108.453	-2.123	0.00062916	0.0078064	DOWN	--	--	0
MD02G1091500	0	0.129642	0.81809	2.49001	21.8005	0	Inf	0.10951	0.39525	FALSE	142.406	0	Inf	0.01827	0.10027	FALSE	405.816	0	Inf	7e-09	4.14e-07	UP	sp|Q6RYA0|SABP2_TOBAC	Salicylic acid-binding protein 2 OS=Nicotiana tabacum GN=SABP2 PE=1 SV=1	SABP2
MD02G1091600	0.798902	0.143366	0.121661	0.213709	10.7278	41.8704	-1.9646	0.035145	0.21015	FALSE	9.20079	47.0216	-2.3535	0.0013325	0.014779	DOWN	15.5044	43.629	-1.4926	0.069645	0.28284	FALSE	--	--	0
MD02G1092100	0.297362	0.0522658	0.0119201	0.0237816	5.74136	18.7053	-1.704	0.085443	0.34579	FALSE	1.09353	20.992	-4.2628	0.0010038	0.011844	DOWN	2.23917	19.4147	-3.1161	0.0090052	0.064535	FALSE	sp|P24465|C71A1_PERAE	Cytochrome P450 71A1 OS=Persea americana GN=CYP71A1 PE=1 SV=2	CYP71A1
MD02G1093500	104.6	17.4872	16.1043	36.2373	2118.11	9626.73	-2.1843	0.0092774	0.091482	FALSE	2171.11	10813	-2.3163	0.00081982	0.010142	DOWN	4601.67	10046.9	-1.1265	0.28494	0.66071	FALSE	sp|Q9ZUF6|SBT18_ARATH	Subtilisin-like protease SBT1.8 OS=Arabidopsis thaliana GN=SBT1.8 PE=1 SV=1	SBT1.8
MD02G1094000	6.07115	0.495326	1.34705	1.34994	29.4221	267.363	-3.1838	1.04e-06	0.0001297	DOWN	83.6029	300.344	-1.845	0.00011929	0.0022275	DOWN	82.4438	278.629	-1.7569	0.0019388	0.019269	DOWN	sp|Q07379|YD057_YEAST	Putative uncharacterized protein YDL057W OS=Saccharomyces cerevisiae (strain ATCC 204508 / S288c) GN=YDL057W PE=4 SV=1	YDL057W
MD02G1094400	1.06022	1.91148	0.275603	0	54.4764	16.1982	1.7498	0.60513	0.89545	FALSE	6.115	18.1919	-1.5729	0.1323	0.37656	FALSE	0	16.8648	#NAME?	0.00042711	0.0057004	DOWN	--	--	0
MD02G1094500	0.608084	0.37416	0.236524	0.0146787	28.3402	25.3481	0.16097	0.91314	1	FALSE	14.1799	28.4865	-1.0064	0.22676	0.52272	FALSE	0.937147	26.4845	-4.8207	0.0001264	0.0020817	DOWN	sp|Q9SD07|SSL4_ARATH	Protein STRICTOSIDINE SYNTHASE-LIKE 4 OS=Arabidopsis thaliana GN=SSL4 PE=1 SV=1	SSL4
MD02G1094600	3.12774	0.442842	0.990844	1.19759	55.3083	276.85	-2.3235	0.00019183	0.0062344	DOWN	127.696	310.987	-1.2841	0.0015356	0.016507	DOWN	149.075	288.415	-0.95211	0.11095	0.38495	FALSE	sp|Q9FT72|RQL3_ARATH	ATP-dependent DNA helicase Q-like 3 OS=Arabidopsis thaliana GN=RECQL3 PE=1 SV=1	RECQL3
MD02G1095700	0.725704	6.41066	26.6877	51.2185	714.541	51.5373	3.7933	0.21372	0.55461	FALSE	3132.67	57.9449	5.7566	0.11307	0.34157	FALSE	5430.22	53.7676	6.6581	2.03e-17	7.43e-15	UP	sp|Q0DXZ1|CSLE2_ORYSJ	Cellulose synthase-like protein E2 OS=Oryza sativa subsp. japonica GN=CSLE2 PE=2 SV=1	CSLE2
MD02G1096100	334.505	143.534	39.5398	50.9196	11272.6	14826.7	-0.39537	0.45193	0.79311	FALSE	2707.48	16652.1	-2.6207	1.36e-13	3.45e-11	DOWN	3324.97	15420.7	-2.2135	4.47e-08	2.11e-06	DOWN	sp|Q9LMA8|TI10A_ARATH	Protein TIFY 10A OS=Arabidopsis thaliana GN=TIFY10A PE=1 SV=1	TIFY10A
MD02G1096300	73.6054	14.1074	18.2036	14.273	1074.59	3747.27	-1.802	0.0051934	0.062918	FALSE	1366.42	4205.67	-1.6219	0.0085108	0.057922	FALSE	1022.81	3887.03	-1.9261	0.0063748	0.049583	DOWN	sp|Q8LGS1|MARD1_ARATH	Protein MARD1 OS=Arabidopsis thaliana GN=MARD1 PE=2 SV=2	MARD1
MD02G1096700	13.7105	4.55766	6.52031	4.4788	1111.03	2236.42	-1.0093	0.057257	0.27655	FALSE	1590.51	2510.73	-0.65862	0.054486	0.21179	FALSE	1053.65	2324.47	-1.1415	0.0060828	0.047792	DOWN	sp|Q8RYC8|ARFS_ARATH	Auxin response factor 19 OS=Arabidopsis thaliana GN=ARF19 PE=1 SV=2	ARF19
MD02G1097300	1.38417	2.71976	3.75924	5.1011	29.9203	9.38117	1.6733	0.065378	0.29831	FALSE	39.4743	10.5416	1.9048	0.14262	0.39497	FALSE	51.2244	9.78544	2.3881	0.002066	0.020332	UP	sp|Q40392|TMVRN_NICGU	TMV resistance protein N OS=Nicotiana glutinosa GN=N PE=1 SV=1	N
MD02G1097400	0.472379	0.605546	1.01555	1.66681	45.3673	21.6765	1.0655	0.16541	0.48847	FALSE	71.0172	24.3598	1.5437	0.10613	0.32747	FALSE	111.203	22.6619	2.2949	4.49e-05	0.00086698	UP	sp|Q40392|TMVRN_NICGU	TMV resistance protein N OS=Nicotiana glutinosa GN=N PE=1 SV=1	N
MD02G1097500	0.956239	1.49799	2.23492	4.4167	69.3765	26.5986	1.3831	0.094515	0.36456	FALSE	95.7782	29.8916	1.68	0.11018	0.33556	FALSE	183.236	27.7929	2.7209	6.68e-05	0.0012143	UP	sp|Q9C9P4|KASC2_ARATH	3-oxoacyl-[acyl-carrier-protein] synthase II, chloroplastic OS=Arabidopsis thaliana GN=KAS2 PE=1 SV=1	KAS2
MD02G1098100	18.6731	3.9759	6.23274	4.5538	397.912	1183.7	-1.5728	0.002796	0.041474	DOWN	586.228	1329.13	-1.1809	0.00053008	0.0071833	DOWN	410.369	1230.72	-1.5845	0.00031114	0.0043982	DOWN	sp|Q40392|TMVRN_NICGU	TMV resistance protein N OS=Nicotiana glutinosa GN=N PE=1 SV=1	N
MD00G1020000	2.52303	0.637127	0.885668	0.620317	77.2696	202.562	-1.3904	0.022779	0.1609	FALSE	105.415	227.483	-1.1097	0.0083284	0.057104	FALSE	70.7666	210.6	-1.5734	0.0021822	0.021227	DOWN	sp|O23530|SNC1_ARATH	Protein SUPPRESSOR OF npr1-1, CONSTITUTIVE 1 OS=Arabidopsis thaliana GN=SNC1 PE=1 SV=4	SNC1
MD02G1099000	21.4354	7.75479	5.85123	3.79212	2302.71	3840.48	-0.73795	0.090956	0.3575	FALSE	1565.63	4312.45	-1.4618	1.29e-05	0.00035862	DOWN	970.186	3994.57	-2.0417	1.58e-06	4.86e-05	DOWN	sp|Q40392|TMVRN_NICGU	TMV resistance protein N OS=Nicotiana glutinosa GN=N PE=1 SV=1	N
MD02G1099200	8.33364	0.714758	0.691668	0.621754	34.5021	301.788	-3.1288	1.19e-06	0.00014122	DOWN	37.1283	338.939	-3.1904	4.29e-13	9.87e-11	DOWN	31.7096	314.437	-3.3098	2.61e-10	2.3e-08	DOWN	sp|P17407|21KD_DAUCA	21 kDa protein OS=Daucus carota PE=2 SV=1	2
MD02G1099300	69.1223	81.655	129.506	91.5994	2425.99	1343.64	0.85243	0.073958	0.32083	FALSE	3819.46	1509.54	1.3393	8.48e-05	0.0016822	UP	2644.27	1401.17	0.91624	0.032731	0.16764	FALSE	--	--	0
MD02G1099600	0	0.250493	7.64291	8.49272	21.2513	0	Inf	0.066498	0.30159	FALSE	678.251	0	Inf	0.022514	0.11647	FALSE	688.655	0	Inf	3.07e-10	2.67e-08	UP	sp|Q9LMA1|FMO1_ARATH	Probable flavin-containing monooxygenase 1 OS=Arabidopsis thaliana GN=FMO1 PE=2 SV=1	FMO1
MD02G1099700	5.16846	7.24096	7.92015	4.75376	897.765	407.269	1.1404	0.043092	0.23675	FALSE	943.355	457.318	1.0446	0.0027182	0.025251	UP	544.018	423.686	0.36066	0.3714	0.75123	FALSE	--	--	0
MD02G1099800	8.02883	2.03315	2.94219	1.54656	103.74	274.82	-1.4055	0.021389	0.15544	FALSE	147.654	308.697	-1.064	0.0084749	0.057761	FALSE	79.9513	286.215	-1.8399	3.67e-05	0.00073137	DOWN	sp|Q6QPJ6|PRXQ_POPJC	Peroxiredoxin Q, chloroplastic OS=Populus jackii GN=PRXQ PE=1 SV=1	PRXQ
MD02G1100200	0.34079	1.47692	5.01267	20.2273	28.1881	4.22088	2.7395	0.13032	0.43229	FALSE	98.065	4.74518	4.3692	0.0094729	0.062583	FALSE	364.218	4.41044	6.3677	1.11e-09	8.38e-08	UP	sp|O65695|SAU50_ARATH	Auxin-responsive protein SAUR50 OS=Arabidopsis thaliana GN=SAUR50 PE=1 SV=1	SAUR50
MD02G1100600	2.73496	20.6508	8.97838	14.6024	3290.7	241.689	3.7672	0.12395	0.42087	FALSE	1275.34	271.546	2.2316	0.23668	0.53613	FALSE	1919.25	251.702	2.9308	2e-10	1.83e-08	UP	sp|P13708|SUSY_SOYBN	Sucrose synthase OS=Glycine max GN=SS PE=1 SV=2	SS
MD02G1100700	1.27149	0.331121	0.336336	0.18785	27.3867	68.8023	-1.329	0.058306	0.27928	FALSE	26.9793	77.2337	-1.5174	0.0080095	0.055524	FALSE	14.8964	71.3786	-2.2605	0.00053794	0.0068717	DOWN	--	--	0
MD02G1101000	0.682433	0.135195	0.109668	0.0128744	3.64048	14.2051	-1.9642	0.16542	0.48847	FALSE	3.23817	15.9518	-2.3005	0.063894	0.23517	FALSE	0.364877	14.7809	-5.3402	0.0039729	0.034245	DOWN	--	--	0
MD02G1101700	2.33082	0.39035	0.263562	0.191878	92.6622	337.742	-1.8659	0.00058562	0.014018	DOWN	57.1387	379.274	-2.7307	5.19e-11	8.11e-09	DOWN	39.5304	351.558	-3.1527	4.88e-10	4.03e-08	DOWN	sp|Q40392|TMVRN_NICGU	TMV resistance protein N OS=Nicotiana glutinosa GN=N PE=1 SV=1	N
MD02G1101800	2.56585	0.524351	0.34539	0.113153	16.7043	55.113	-1.7222	0.022925	0.16145	FALSE	10.7861	61.8704	-2.5201	0.00014915	0.0026759	DOWN	3.3271	57.272	-4.1055	2.64e-06	7.6e-05	DOWN	sp|Q40392|TMVRN_NICGU	TMV resistance protein N OS=Nicotiana glutinosa GN=N PE=1 SV=1	N
MD02G1102100	4.42707	0.644039	0.829463	0.736014	17.3594	78.9061	-2.1844	0.0027374	0.040937	DOWN	21.6146	88.6244	-2.0357	0.00030785	0.0047299	DOWN	18.9245	82.1891	-2.1187	0.00087177	0.010184	DOWN	sp|Q8S949|KN7B_TOBAC	Kinesin-like protein NACK2 OS=Nicotiana tabacum GN=NACK2 PE=1 SV=1	NACK2
MD02G1103700	2.45176	0.950563	0.966492	0.643993	80.4549	138.699	-0.78571	0.19663	0.53342	FALSE	82.2066	155.774	-0.92212	0.036811	0.16338	FALSE	53.1093	144.541	-1.4444	0.0053338	0.043008	DOWN	sp|D3YYI7|RN217_MOUSE	Probable E3 ubiquitin-protein ligase RNF217 OS=Mus musculus GN=Rnf217 PE=3 SV=2	Rnf217
MD17G1055500	0.169813	0.25321	1.06605	4.20952	9.27854	4.28457	1.1147	0.33299	0.68836	FALSE	41.2371	4.81773	3.0975	0.010959	0.069665	FALSE	159.126	4.49361	5.1462	1.19e-09	8.83e-08	UP	sp|A0A0M4KE44|CGT_MANIN	UDP-glycosyltransferase 13 OS=Mangifera indica GN=CGT PE=1 SV=1	CGT
MD02G1104500	0.873305	0.00544094	0.0344211	0.263378	0.568667	48.0066	-6.3995	2.73e-07	4.66e-05	DOWN	2.73542	53.9441	-4.3016	3.49e-06	0.00012132	DOWN	19.8186	50.041	-1.3363	0.22805	0.58676	FALSE	sp|O48711|PME12_ARATH	Probable pectinesterase/pectinesterase inhibitor 12 OS=Arabidopsis thaliana GN=PME12 PE=2 SV=1	PME12
MD02G1104600	7.68727	1.9078	1.9959	1.32944	154.371	460.727	-1.5775	0.062052	0.28925	FALSE	182.593	517.432	-1.5027	0.019519	0.10519	FALSE	115.005	480.629	-2.0632	0.0057155	0.045568	DOWN	sp|Q43062|PME_PRUPE	Pectinesterase/pectinesterase inhibitor PPE8B OS=Prunus persica PE=2 SV=1	2
MD02G1105300	4.14497	7.42071	11.208	12.5824	1499.7	558.809	1.4243	0.0066684	0.073903	FALSE	2263.25	627.64	1.8504	6.57e-07	2.97e-05	UP	2450.4	582.269	2.0733	3.15e-07	1.19e-05	UP	sp|Q9SMZ4|AASS_ARATH	Alpha-aminoadipic semialdehyde synthase OS=Arabidopsis thaliana GN=LKR/SDH PE=1 SV=1	LKR/SDH
MD02G1105900	4.53893	1.48472	0.751075	0.616296	105.848	194.42	-0.87719	0.15369	0.46943	FALSE	49.4266	218.429	-2.1438	0.0016501	0.017457	DOWN	37.1693	203.049	-2.4496	0.0021297	0.020834	DOWN	sp|Q9C5K8|TIF3B_ARATH	Protein TIFY 3B OS=Arabidopsis thaliana GN=TIFY3B PE=1 SV=1	TIFY3B
MD02G1106000	14.6827	1.64237	3.40521	6.98453	75.8619	467.209	-2.6226	8.47e-06	0.00062161	DOWN	155.189	524.785	-1.7577	0.0002122	0.0035349	DOWN	316.642	487.024	-0.62114	0.22536	0.58337	FALSE	sp|Q94A32|FAX2_ARATH	Protein FATTY ACID EXPORT 2, chloroplastic OS=Arabidopsis thaliana GN=FAX2 PE=2 SV=1	FAX2
MD02G1106500	2.15587	2.7706	3.23743	4.9336	149.132	73.7945	1.015	0.092419	0.3603	FALSE	168.418	82.8643	1.0232	0.022898	0.1177	FALSE	244.051	76.6774	1.6703	0.00032674	0.0045778	UP	sp|Q7XKU5|DAO_ORYSJ	2-oxoglutarate-dependent dioxygenase DAO OS=Oryza sativa subsp. japonica GN=DAO PE=2 SV=2	DAO
MD02G1106700	5.33554	0.364934	0.665343	0.70876	37.6424	371.194	-3.3017	1.32e-07	2.65e-05	DOWN	68.3891	416.838	-2.6076	2.02e-10	2.66e-08	DOWN	69.5807	386.401	-2.4733	4.4e-07	1.59e-05	DOWN	sp|Q40392|TMVRN_NICGU	TMV resistance protein N OS=Nicotiana glutinosa GN=N PE=1 SV=1	N
MD02G1106800	4.18624	0.34223	0.509914	0.565091	25.2404	203.296	-3.0098	4.31e-06	0.00037751	DOWN	35.5548	228.334	-2.683	9.11e-09	7.47e-07	DOWN	39.6571	211.818	-2.4172	3.16e-06	8.9e-05	DOWN	sp|F4KIF3|CSA1_ARATH	Disease resistance-like protein CSA1 OS=Arabidopsis thaliana GN=CSA1 PE=4 SV=1	CSA1
MD02G1107000	9.09379	2.56469	0.685988	0.555544	211.435	408.791	-0.95115	0.20221	0.54025	FALSE	47.9074	459.301	-3.2611	1.41e-06	5.76e-05	DOWN	36.0295	425.86	-3.5631	1.13e-06	3.65e-05	DOWN	sp|Q7XKU5|DAO_ORYSJ	2-oxoglutarate-dependent dioxygenase DAO OS=Oryza sativa subsp. japonica GN=DAO PE=2 SV=2	DAO
MD02G1107400	28.5492	57.059	53.6034	40.7663	1770.87	562.237	1.6552	0.002747	0.041008	UP	1606.34	631.322	1.3473	0.0025781	0.024264	UP	1187.5	584.656	1.0223	0.019064	0.11305	FALSE	--	--	0
MD02G1107500	18.0013	6.45064	7.34537	4.46521	951.595	1814.7	-0.93131	0.095216	0.36568	FALSE	1103.51	2037.47	-0.88468	0.010534	0.067701	FALSE	655.33	1888.37	-1.5269	0.00020601	0.0031238	DOWN	sp|Q9ZSP5|AIR3_ARATH	Subtilisin-like protease SBT5.3 OS=Arabidopsis thaliana GN=AIR3 PE=2 SV=1	AIR3
MD02G1109000	5.15004	19.6192	19.1843	24.8636	2646.14	432.373	2.6135	1.14e-05	0.00077124	UP	2480.17	485.595	2.3526	9.38e-06	0.00027453	UP	3059.59	450.15	2.7649	7.92e-11	8e-09	UP	sp|Q6Z8P4|PIRL4_ORYSJ	Plant intracellular Ras-group-related LRR protein 4 OS=Oryza sativa subsp. japonica GN=IRL4 PE=2 SV=1	IRL4
MD02G1109200	1.13545	0.145006	0.314363	0.242705	25.8223	138.515	-2.4234	0.00037375	0.010223	DOWN	56.3431	155.537	-1.465	0.0013691	0.01512	DOWN	42.914	144.219	-1.7487	0.0010384	0.011701	DOWN	sp|Q40392|TMVRN_NICGU	TMV resistance protein N OS=Nicotiana glutinosa GN=N PE=1 SV=1	N
MD02G1110400	1.18635	0.2818	0.23242	0.274172	55.0539	156.37	-1.506	0.014943	0.12398	FALSE	44.8435	175.627	-1.9695	2.83e-05	0.00068824	DOWN	51.6701	162.883	-1.6564	0.0018992	0.018944	DOWN	sp|Q7X7H4|KN7F_ORYSJ	Kinesin-like protein KIN-7F OS=Oryza sativa subsp. japonica GN=KIN7F PE=1 SV=2	KIN7F
MD02G1110500	67.0289	16.5103	4.71106	1.17555	773.246	2314.36	-1.5816	0.1053	0.38615	FALSE	239.165	2599.55	-3.4422	0.0007698	0.009649	DOWN	57.0224	2416.85	-5.4055	1.11e-05	0.00026399	DOWN	--	--	0
MD02G1111800	0.722675	0.307893	0.142151	0.0553471	23.527	31.8185	-0.43555	0.51853	0.84027	FALSE	8.98159	35.7437	-1.9926	0.023492	0.11984	FALSE	3.3415	33.2365	-3.3142	0.002813	0.02605	DOWN	sp|Q40392|TMVRN_NICGU	TMV resistance protein N OS=Nicotiana glutinosa GN=N PE=1 SV=1	N
MD02G1112400	0.416812	0.0614134	0.0610451	0.0470739	11.2705	45.6713	-2.0187	0.012139	0.10899	FALSE	9.83398	51.301	-2.3831	0.00065668	0.0084978	DOWN	7.11987	47.5624	-2.7399	0.0011415	0.012614	DOWN	sp|Q40392|TMVRN_NICGU	TMV resistance protein N OS=Nicotiana glutinosa GN=N PE=1 SV=1	N
MD02G1113400	74.82	197.559	271.21	213.109	6247.98	1645.5	1.9249	0.011962	0.10798	FALSE	9164.96	1848.97	2.3094	1.2e-06	5.05e-05	UP	6888.97	1718.73	2.0029	0.0013622	0.014507	UP	sp|Q8LC69|ATL8_ARATH	RING-H2 finger protein ATL8 OS=Arabidopsis thaliana GN=ATL8 PE=2 SV=2	ATL8
MD02G1113800	6.86687	28.2181	24.8732	65.7033	2862.98	412.844	2.7938	0.015809	0.12819	FALSE	2361.32	463.932	2.3476	0.045718	0.18793	FALSE	5939.04	430.791	3.7852	9e-07	2.98e-05	UP	sp|Q9SHL8|PILS5_ARATH	Protein PIN-LIKES 5 OS=Arabidopsis thaliana GN=PILS5 PE=2 SV=1	PILS5
MD15G1083700	0.530613	1.31347	1.34504	1.18863	123.07	33.1643	1.8918	0.0032924	0.046126	UP	125.358	37.2514	1.7507	0.00022522	0.0037137	UP	108.897	34.5408	1.6566	0.0028551	0.026392	UP	sp|Q8GWW4|GUX2_ARATH	UDP-glucuronate:xylan alpha-glucuronosyltransferase 2 OS=Arabidopsis thaliana GN=GUX2 PE=2 SV=1	GUX2
MD02G1114500	2.88345	0.783491	1.0126	0.841924	78.305	196.469	-1.3271	0.035685	0.21194	FALSE	104.045	220.72	-1.085	0.0066369	0.048432	DOWN	82.9004	204.886	-1.3054	0.0086262	0.062588	FALSE	sp|Q45FA5|SRPK_PHYPO	Serine/threonine-protein kinase SRPK OS=Physarum polycephalum PE=1 SV=1	1
MD02G1114900	21.8759	2.97205	4.46387	4.5676	207.862	1007.57	-2.2772	2.87e-05	0.0015363	DOWN	295.684	1131.49	-1.9361	1.35e-07	7.68e-06	DOWN	301.396	1048.06	-1.798	3.83e-05	0.00075736	DOWN	sp|O81788|WOX13_ARATH	WUSCHEL-related homeobox 13 OS=Arabidopsis thaliana GN=WOX13 PE=2 SV=1	WOX13
MD02G1116500	30.7055	54.8139	56.7716	30.7189	3807.12	1443.6	1.399	0.0073304	0.078365	FALSE	3960.48	1620.61	1.2891	7.75e-05	0.0015615	UP	2052.08	1500.58	0.45157	0.18117	0.51678	FALSE	sp|P93047|HMGB3_ARATH	High mobility group B protein 3 OS=Arabidopsis thaliana GN=HMGB3 PE=1 SV=1	HMGB3
MD02G1118100	23.1921	19.1445	52.0296	101.761	572.028	450.437	0.34476	0.55421	0.86491	FALSE	1582.7	506.143	1.6448	0.24133	0.5418	FALSE	2881.45	469.873	2.6165	0.00033905	0.0047134	UP	sp|Q9C523|DIR19_ARATH	Dirigent protein 19 OS=Arabidopsis thaliana GN=DIR19 PE=2 SV=1	DIR19
MD02G1118400	2.40173	0.345461	0.542722	0.310964	9.42725	48.1452	-2.3525	0.0073318	0.078365	FALSE	15.3731	54.0501	-1.8139	0.026219	0.12956	FALSE	8.95767	49.9351	-2.4789	0.0020736	0.020397	DOWN	sp|Q9SH66|DIR5_ARATH	Dirigent protein 5 OS=Arabidopsis thaliana GN=DIR5 PE=2 SV=1	DIR5
MD02G1119100	0.437905	2.79987	0.874053	1.48694	313.294	27.7032	3.4994	0.075617	0.32429	FALSE	86.905	31.1185	1.4817	0.25264	0.55701	FALSE	140.872	28.9018	2.2852	0.00035914	0.0049425	UP	sp|P46277|CCNB1_MEDSV	G2/mitotic-specific cyclin-1 OS=Medicago sativa subsp. varia PE=2 SV=1	2
MD08G1235900	9.59086	0.483599	0.990559	1.65366	120.358	1737.62	-3.8517	1.14e-10	9.67e-08	DOWN	259.327	1951.25	-2.9116	3.4e-15	1.22e-12	DOWN	420.064	1806.9	-2.1048	2.23e-06	6.57e-05	DOWN	sp|Q0WL80|UGGG_ARATH	UDP-glucose:glycoprotein glucosyltransferase OS=Arabidopsis thaliana GN=UGGT PE=1 SV=1	UGGT
MD02G1119700	0.25184	0.874342	1.48457	3.27677	67.766	12.0738	2.4887	0.014493	0.12156	FALSE	113.382	13.5684	3.0629	0.054274	0.21134	FALSE	227.414	12.5892	4.1751	2.56e-08	1.29e-06	UP	sp|Q8LFC0|IDH1_ARATH	Isocitrate dehydrogenase [NAD] regulatory subunit 1, mitochondrial OS=Arabidopsis thaliana GN=IDH1 PE=1 SV=2	IDH1
MD02G1119800	37.9295	47.7164	72.0297	59.3148	3967.21	2211.66	0.84299	0.19611	0.53304	FALSE	6202.94	2483.37	1.3207	0.00077999	0.0097408	UP	5054.18	2298.47	1.1368	0.0050413	0.041085	UP	sp|Q9CAZ7|SSL5_ARATH	Protein STRICTOSIDINE SYNTHASE-LIKE 5 OS=Arabidopsis thaliana GN=SSL5 PE=2 SV=1	SSL5
MD15G1427500	23.8738	2.5357	5.13896	7.45063	639.833	4388.76	-2.778	1.35e-06	0.00015407	DOWN	1378.85	4929.28	-1.8379	1.29e-07	7.38e-06	DOWN	1939.7	4567.45	-1.2356	0.004887	0.040137	DOWN	sp|Q0WL80|UGGG_ARATH	UDP-glucose:glycoprotein glucosyltransferase OS=Arabidopsis thaliana GN=UGGT PE=1 SV=1	UGGT
MD02G1122400	0.122395	7.06043	1.11085	0.600465	464.602	4.44005	6.7093	0.057326	0.27669	FALSE	59.7759	4.98553	3.5837	4.11e-07	2e-05	UP	31.0537	4.62765	2.7464	0.0069141	0.052745	FALSE	sp|Q38853|STR15_ARATH	Rhodanese-like domain-containing protein 15, chloroplastic OS=Arabidopsis thaliana GN=STR15 PE=2 SV=1	STR15
MD02G1123100	68.7029	34.2741	36.3253	20.1576	5261.43	7318.36	-0.47606	0.47387	0.80845	FALSE	5835.22	8214.95	-0.49347	0.24903	0.55212	FALSE	3074.74	7603.66	-1.3062	0.0038179	0.033257	DOWN	sp|Q9C5Y0|PLDD1_ARATH	Phospholipase D delta OS=Arabidopsis thaliana GN=PLDDELTA PE=1 SV=2	PLDDELTA
MD02G1124800	12.2815	4.24248	3.94486	2.4552	264.492	500.978	-0.92152	0.085575	0.34603	FALSE	234.635	562.532	-1.2615	0.00096787	0.011523	DOWN	144.08	521.093	-1.8547	4.19e-05	0.00081665	DOWN	--	--	0
MD02G1127400	4.45431	0.513625	0.683974	1.53469	55.191	351.96	-2.6729	1.37e-05	0.0008792	DOWN	79.667	395.154	-2.3104	1.27e-08	9.99e-07	DOWN	168.448	366.167	-1.1202	0.1598	0.48038	FALSE	sp|Q8L7E9|MCAC1_ARATH	Protein MID1-COMPLEMENTING ACTIVITY 1 OS=Arabidopsis thaliana GN=MCA1 PE=1 SV=1	MCA1
MD02G1127700	3.79239	0.958727	0.871169	0.391259	22.4107	64.5145	-1.5254	0.056309	0.27424	FALSE	22.4534	72.4736	-1.6905	0.0063633	0.046955	DOWN	9.35904	67.2989	-2.8461	0.00011417	0.0019109	DOWN	--	--	0
MD02G1128200	49.6608	14.3266	16.6148	21.1075	882.013	2010.81	-1.1889	0.026835	0.17801	FALSE	996.922	2258.44	-1.1798	0.00069546	0.0089061	DOWN	1234.8	2093.66	-0.76175	0.072232	0.28971	FALSE	sp|Q9SXU1|PSA7_CICAR	Proteasome subunit alpha type-7 OS=Cicer arietinum GN=PAD1 PE=2 SV=1	PAD1
MD02G1128300	2.71711	1.99323	4.32661	0.582449	364.603	375.056	-0.040781	0.90919	1	FALSE	894.553	421.384	1.086	0.0376	0.16566	FALSE	111.308	391.431	-1.8142	0.006384	0.049645	DOWN	sp|Q9SXL4|AHK1_ARATH	Histidine kinase 1 OS=Arabidopsis thaliana GN=AHK1 PE=1 SV=2	AHK1
MD03G1082200	4.55576	16.8151	28.1554	77.0863	1460.17	249.729	2.5477	0.01264	0.11167	FALSE	2360.43	280.732	3.0718	0.0020924	0.020736	UP	6237.38	261.85	4.5741	1.46e-17	5.6e-15	UP	sp|U3UA11|UGT7_CATRO	UDP-glucose iridoid glucosyltransferase OS=Catharanthus roseus GN=UGT76A2 PE=1 SV=1	UGT76A2
MD00G1046200	2.3063	3.7868	7.94778	22.9841	304.265	112.359	1.4372	0.078053	0.32913	FALSE	593.027	126.151	2.2329	0.0081415	0.056201	FALSE	1659.21	116.818	3.8282	8.95e-06	0.00021944	UP	sp|Q2V6J9|UFOG7_FRAAN	UDP-glucose flavonoid 3-O-glucosyltransferase 7 OS=Fragaria ananassa GN=GT7 PE=1 SV=1	GT7
MD02G1130000	0.00911556	3.49814	0.871574	0.647679	326.642	0.499849	9.352	1.19e-06	0.00014122	UP	76.297	0.562054	7.0848	0.00043019	0.0060908	UP	53.1466	0.523202	6.6665	0.00043243	0.0057583	UP	sp|F4I9E1|NFD4_ARATH	Protein NUCLEAR FUSION DEFECTIVE 4 OS=Arabidopsis thaliana GN=NFD4 PE=3 SV=1	NFD4
MD02G1131800	463.496	621.008	664.724	293.952	14432.5	7372.45	0.96911	0.049026	0.25549	FALSE	15641.3	8279.78	0.91769	0.003702	0.031824	UP	6732.58	7683.96	-0.19069	0.72716	0.97626	FALSE	sp|Q9FYB5|DNJ11_ARATH	Chaperone protein dnaJ 11, chloroplastic OS=Arabidopsis thaliana GN=ATJ11 PE=1 SV=2	ATJ11
MD02G1132200	20.2837	1.61893	3.17062	18.6443	119.895	1031.99	-3.1056	1.13e-05	0.00076519	DOWN	231.164	1159.3	-2.3263	0.00057421	0.0076043	DOWN	1373.06	1073.67	0.35484	0.38463	0.76409	FALSE	sp|Q06942|FL3H_MALDO	Naringenin,2-oxoglutarate 3-dioxygenase OS=Malus domestica PE=2 SV=1	2
MD02G1132400	2.54597	0.0801698	0.00815566	0.155277	3.26461	81.8289	-4.6476	0.00049679	0.012483	DOWN	0.350372	91.9471	-8.0358	3.98e-06	0.00013491	DOWN	7.01138	85.5668	-3.6093	0.0035333	0.031302	DOWN	sp|Q93X17|SNAK2_SOLTU	Snakin-2 OS=Solanum tuberosum GN=SN2 PE=1 SV=1	SN2
MD02G1133100	20.3088	4.03268	6.50397	7.43414	445.953	1613.18	-1.8549	0.0012121	0.02349	DOWN	761.973	1811.57	-1.2494	0.00034587	0.0051719	DOWN	841.974	1678.94	-0.9957	0.02418	0.13467	FALSE	sp|Q66JG8|ALKB5_XENTR	RNA demethylase ALKBH5 OS=Xenopus tropicalis GN=alkbh5 PE=2 SV=1	alkbh5
MD02G1134000	12.543	26.8887	22.0753	14.151	2920.65	858.48	1.7664	0.0011763	0.022971	UP	2296.58	964.261	1.252	0.00025305	0.0040339	UP	1428.47	895.004	0.67451	0.11484	0.39302	FALSE	sp|Q7XM16|C3H30_ORYSJ	Zinc finger CCCH domain-containing protein 30 OS=Oryza sativa subsp. japonica GN=Os04g0663200 PE=2 SV=3	Os04g0663200
MD06G1185900	5.20753	0.416373	1.08888	2.57784	68.7446	587.297	-3.0948	2.03e-07	3.76e-05	DOWN	178.538	659.858	-1.8859	0.00062231	0.0081408	DOWN	424.445	612.226	-0.52849	0.22438	0.58175	FALSE	sp|Q8GYP6|PPR49_ARATH	Pentatricopeptide repeat-containing protein At1g18900 OS=Arabidopsis thaliana GN=At1g18900 PE=2 SV=1	At1g18900
MD07G1007400	0.262242	5.50479	17.2619	111.268	430.709	12.6821	5.0859	0.029046	0.18695	FALSE	1336.09	14.2512	6.5508	0.0047723	0.0383	UP	8193.96	13.2519	9.2722	3.8e-10	3.24e-08	UP	sp|Q2V6J9|UFOG7_FRAAN	UDP-glucose flavonoid 3-O-glucosyltransferase 7 OS=Fragaria ananassa GN=GT7 PE=1 SV=1	GT7
MD02G1136700	39.5237	56.7808	57.4	61.6406	3273.64	1460.06	1.1649	0.027592	0.18143	FALSE	3238.35	1639.61	0.9819	0.004646	0.037538	UP	3384.66	1519.22	1.1557	0.0073515	0.055256	FALSE	sp|Q9FVX1|GRXC3_ARATH	Glutaredoxin-C3 OS=Arabidopsis thaliana GN=GRXC3 PE=2 SV=1	GRXC3
MD02G1137700	1.5204	1.64564	3.35814	1.91751	164.469	101.792	0.69219	0.23211	0.57822	FALSE	328.411	114.338	1.5222	0.0037003	0.031824	UP	186.508	105.916	0.81632	0.076583	0.30117	FALSE	sp|Q9M066|C90C1_ARATH	3-epi-6-deoxocathasterone 23-monooxygenase OS=Arabidopsis thaliana GN=ROT3 PE=2 SV=3	ROT3
MD02G1138600	18.4197	30.0976	34.9482	31.4832	1879.86	795.78	1.2402	0.073299	0.31912	FALSE	2289.78	893.906	1.357	9.2e-05	0.0018005	UP	1966.36	828.625	1.2467	0.0015097	0.015767	UP	sp|I6YGS0|EPHA_MYCTU	Epoxide hydrolase A OS=Mycobacterium tuberculosis (strain ATCC 25618 / H37Rv) GN=ephA PE=1 SV=1	ephA
MD02G1138900	2.11069	0.129973	0	0	7.47332	85.4073	-3.5145	1.6e-05	0.00098323	DOWN	0	95.905	#NAME?	1.68e-17	9.9e-15	DOWN	0	88.9726	#NAME?	1.41e-14	3.16e-12	DOWN	sp|Q9FJZ9|PER72_ARATH	Peroxidase 72 OS=Arabidopsis thaliana GN=PER72 PE=1 SV=1	PER72
MD02G1139900	65.1143	2534.77	593.969	1017.46	147574	2070.6	6.1552	0.076455	0.32556	FALSE	30729.2	2326.83	3.7232	0.11997	0.35484	FALSE	48411	2168.85	4.4803	7.44e-06	0.00018692	UP	--	--	0
MD02G1140000	233.415	1004.36	58.0948	21.6602	68211.8	8725.16	2.9668	0.30521	0.66101	FALSE	3395.09	9797.34	-1.5289	0.0024037	0.023019	DOWN	1165.09	9090.46	-2.9639	2.4e-06	7.01e-05	DOWN	--	--	0
MD02G1140100	262.223	120.373	44.3215	17.1012	10193.2	14047.6	-0.46272	0.26955	0.62386	FALSE	3536.06	15773	-2.1572	2.8e-10	3.56e-08	DOWN	1331.81	14610.8	-3.4556	1.1e-15	3e-13	DOWN	sp|P42759|ERD10_ARATH	Dehydrin ERD10 OS=Arabidopsis thaliana GN=ERD10 PE=1 SV=1	ERD10
MD02G1140200	20.6969	46.1208	3.71499	3.94877	1839.03	463.294	1.9889	0.43265	0.77811	FALSE	124.768	520.211	-2.0599	0.0002255	0.0037168	DOWN	133.496	482.694	-1.8543	0.0011042	0.012294	DOWN	--	--	0
MD07G1007600	4.14032	2.25193	9.80404	24.3329	180.666	213.545	-0.24121	0.70903	0.95712	FALSE	757.665	239.843	1.6595	0.0048455	0.038743	UP	1864.63	222.287	3.0684	4.19e-12	5.7e-10	UP	sp|Q2V6J9|UFOG7_FRAAN	UDP-glucose flavonoid 3-O-glucosyltransferase 7 OS=Fragaria ananassa GN=GT7 PE=1 SV=1	GT7
MD11G1121500	46.9556	64.1952	81.6284	76.5158	6065.11	2855.72	1.0867	0.037753	0.21946	FALSE	7475.65	3207.51	1.2207	0.00028537	0.0044432	UP	6831.7	2973.93	1.1999	0.0032016	0.02895	UP	sp|Q39023|MPK3_ARATH	Mitogen-activated protein kinase 3 OS=Arabidopsis thaliana GN=MPK3 PE=1 SV=2	MPK3
MD02G1141800	3.24081	4.24811	3.49327	7.59441	353.465	154.856	1.1906	0.38915	0.74138	FALSE	256.421	173.982	0.55957	0.51357	0.81369	FALSE	540.37	161.71	1.7405	0.00060052	0.00751	UP	sp|Q8GW96|AATP3_ARATH	AAA-ATPase At2g18193 OS=Arabidopsis thaliana GN=At2g18193 PE=2 SV=1	At2g18193
MD02G1143400	21.3895	5.29631	7.72908	2.24848	186.467	542.771	-1.5414	0.035788	0.21234	FALSE	294.311	609.759	-1.0509	0.12983	0.37217	FALSE	78.9811	566.64	-2.8429	0.00020761	0.0031445	DOWN	--	--	0
MD02G1143500	2.03189	0.375037	0.71676	0.37769	27.9826	111.631	-1.9961	0.0043747	0.056199	FALSE	57.2433	125.378	-1.1311	0.02093	0.11049	FALSE	30.5639	116.282	-1.9277	0.00049456	0.0064011	DOWN	sp|Q6NQL6|LPPE2_ARATH	Lipid phosphate phosphatase epsilon 2, chloroplastic OS=Arabidopsis thaliana GN=LPPE2 PE=1 SV=1	LPPE2
MD02G1143900	9.24906	15.2741	14.6507	18.3683	1819.31	679.76	1.4203	0.010786	0.10113	FALSE	1660.33	763.318	1.1211	0.014641	0.085957	FALSE	2017.5	707.26	1.5123	0.0032352	0.029203	UP	--	--	0
MD02G1144000	0.17725	0.25294	0.291818	0.986827	18.5244	8.59092	1.1085	0.36921	0.72364	FALSE	22.6941	9.65004	1.2337	0.51686	0.81594	FALSE	70.8354	8.94597	2.9852	1.86e-05	0.000412	UP	sp|Q9M1K3|SIP21_ARATH	Probable aquaporin SIP2-1 OS=Arabidopsis thaliana GN=SIP2-1 PE=2 SV=1	SIP2-1
MD02G1144200	39.4457	7.22526	13.9181	23.4467	469.499	1809.24	-1.9462	0.00068579	0.01566	DOWN	942.793	2032.37	-1.1081	0.0036975	0.031822	DOWN	1557.81	1883.45	-0.27386	0.58822	0.90988	FALSE	sp|Q9LFF9|IPYR4_ARATH	Soluble inorganic pyrophosphatase 4 OS=Arabidopsis thaliana GN=PPA4 PE=1 SV=1	PPA4
MD02G1145600	9.1009	17.137	14.015	16.081	2863.03	941.558	1.6044	0.0035937	0.049297	UP	2288.8	1057.57	1.1138	0.26061	0.5673	FALSE	2508.34	979.802	1.3562	0.037492	0.18492	FALSE	sp|O23225|PUB5_ARATH	U-box domain-containing protein 5 OS=Arabidopsis thaliana GN=PUB5 PE=3 SV=3	PUB5
MD02G1145800	1.33776	0.138587	0.0248792	0.06788	3.64048	27.1827	-2.9005	0.011179	0.10337	FALSE	0.721949	30.5322	-5.4023	1.01e-05	0.00029184	DOWN	2.28908	28.3511	-3.6306	0.00030341	0.0043082	DOWN	sp|F4JVB8|RADL1_ARATH	Protein RADIALIS-like 1 OS=Arabidopsis thaliana GN=RL1 PE=2 SV=1	RL1
MD02G1146300	43.4259	7.32105	11.5824	27.2071	365.516	1419.71	-1.9576	0.00075276	0.016754	DOWN	576.332	1594.12	-1.4678	1.2e-05	0.00033763	DOWN	1353.67	1475.81	-0.12463	0.56939	0.89884	FALSE	sp|Q9ZPW7|ZHD6_ARATH	Zinc-finger homeodomain protein 6 OS=Arabidopsis thaliana GN=ZHD6 PE=1 SV=1	ZHD6
MD02G1146700	22.5302	7.03193	7.47364	4.50211	452.264	933.575	-1.0456	0.043038	0.23661	FALSE	451.915	1048.09	-1.2136	0.0013303	0.014759	DOWN	275.071	969.764	-1.8178	1.16e-05	0.00027579	DOWN	sp|Q8IUS5|EPHX4_HUMAN	Epoxide hydrolase 4 OS=Homo sapiens GN=EPHX4 PE=2 SV=2	EPHX4
MD02G1148100	8.70123	2.54083	8.4565	27.4737	198.073	447.101	-1.1746	0.12998	0.4319	FALSE	670.119	502.229	0.41607	0.71092	0.94664	FALSE	2062.73	465.617	2.1473	0.00015633	0.0024736	UP	sp|Q55CU8|RSC5_DICDI	Random slug protein 5 OS=Dictyostelium discoideum GN=rsc5 PE=2 SV=1	rsc5
MD02G1148300	381.746	668.922	621.15	382.485	44262.4	16188.8	1.4511	0.0067172	0.07415	FALSE	39658.4	18175.9	1.1256	0.00057403	0.0076043	UP	23600.1	16834.3	0.48739	0.21388	0.56675	FALSE	--	--	0
MD02G1148500	4.05831	9.68969	6.73202	3.27538	562.872	148.685	1.9206	0.00093285	0.019577	UP	370.821	166.933	1.1514	0.0020914	0.020736	UP	175.558	154.629	0.18314	0.72535	0.97626	FALSE	--	--	0
MD02G1148700	14.478	160.034	58.0055	67.706	7081.48	372.499	4.2487	0.015971	0.12881	FALSE	2177.69	418.406	2.3798	0.00012086	0.0022537	UP	2549.98	388.104	2.716	1.56e-10	1.47e-08	UP	--	--	0
MD02G1149600	16.8835	2.57098	0.362571	0.185854	217.807	1071.78	-2.2989	0.012216	0.10944	FALSE	33.4564	1203.73	-5.1691	1.01e-06	4.32e-05	DOWN	19.2575	1118.52	-5.86	5.13e-08	2.38e-06	DOWN	--	--	0
MD02G1151700	40.1661	15.043	15.1936	11.3618	2278.83	3929.68	-0.78612	0.10521	0.38599	FALSE	2205.7	4412.21	-1.0003	0.0031389	0.028177	DOWN	1605.21	4086.28	-1.348	0.0010811	0.012089	DOWN	sp|Q9LVQ7|IDD1_ARATH	Protein indeterminate-domain 1 OS=Arabidopsis thaliana GN=IDD1 PE=1 SV=1	IDD1
MD02G1152800	75.2615	23.8565	21.6695	10.3995	2881.78	6560.82	-1.1869	0.034667	0.20832	FALSE	2788.7	7368.08	-1.4017	4.36e-05	0.00097733	DOWN	1270.75	6830.68	-2.4263	2.8e-08	1.4e-06	DOWN	sp|A4RF35|AMPP1_MAGO7	Probable Xaa-Pro aminopeptidase P OS=Magnaporthe oryzae (strain 70-15 / ATCC MYA-4617 / FGSC 8958) GN=AMPP PE=3 SV=1	AMPP
MD03G1100700	4.86808	0.888126	1.73045	2.42878	84.0811	325.705	-1.9537	0.0010862	0.021765	DOWN	168.86	365.753	-1.115	0.0041676	0.034705	DOWN	232.788	338.959	-0.54209	0.27488	0.64721	FALSE	sp|Q6NMB6|UTR5B_ARATH	UDP-galactose/UDP-glucose transporter 5B OS=Arabidopsis thaliana GN=At5g59740 PE=2 SV=1	At5g59740
MD02G1153600	15.1834	76.9236	82.0105	38.2604	981.92	125.011	2.9735	3.66e-07	5.85e-05	UP	1003.99	140.487	2.8372	9.97e-08	5.91e-06	UP	456.168	129.872	1.8125	0.040614	0.19607	FALSE	--	--	0
MD16G1076200	20.3085	1.01338	2.25771	8.15124	72.8584	971.544	-3.7371	1.92e-08	5.93e-06	DOWN	162.272	1091.47	-2.7498	2.85e-06	0.00010423	DOWN	571.813	1011.51	-0.8229	0.089311	0.33433	FALSE	sp|Q9M9S6|UTR3_ARATH	UDP-galactose/UDP-glucose transporter 3 OS=Arabidopsis thaliana GN=UTR3 PE=1 SV=1	UTR3
MD05G1033300	14.5256	2.55672	4.72352	10.4405	207.301	774.689	-1.9019	0.00068503	0.01566	DOWN	370.802	870.05	-1.2305	0.00060626	0.0079718	DOWN	795.87	807.102	-0.020218	0.907	1	FALSE	sp|Q9SRE4|UGAL2_ARATH	UDP-galactose transporter 2 OS=Arabidopsis thaliana GN=UDP-GALT2 PE=2 SV=1	UDP-GALT2
MD02G1155900	5.79394	16.7356	3.33382	0.246983	171.656	35.365	2.2791	0.036869	0.21636	FALSE	31.0421	39.6955	-0.35475	0.81493	0.98997	FALSE	2.28237	36.6234	-4.0042	0.0035286	0.031267	DOWN	--	--	0
MD02G1156900	15.2745	3.70331	5.48415	4.88304	478.79	1429.12	-1.5777	0.0055095	0.065326	FALSE	761.818	1604.95	-1.075	0.0022586	0.021942	DOWN	666.296	1487.87	-1.159	0.0046841	0.03886	DOWN	sp|Q9SVM0|Y3078_ARATH	BTB/POZ domain-containing protein At3g50780 OS=Arabidopsis thaliana GN=At3g50780 PE=2 SV=1	At3g50780
MD02G1157100	11.3266	2.6011	4.52563	2.57731	322.555	1019.67	-1.6605	0.0041964	0.054784	FALSE	600.657	1145.27	-0.93107	0.0098502	0.064325	FALSE	334.383	1062.48	-1.6679	0.00011319	0.0018975	DOWN	--	--	0
MD02G1157500	21.7762	38.6473	24.7171	4.65786	985.347	352.728	1.4821	0.0073023	0.07818	FALSE	608.74	396.08	0.62004	0.61305	0.8867	FALSE	108.996	366.898	-1.7511	0.00015604	0.0024709	DOWN	--	--	0
MD02G1157800	108.974	31.4905	32.7448	14.622	2269.64	5132.64	-1.1772	0.025295	0.1713	FALSE	2254.89	5762.1	-1.3535	0.00022725	0.0037337	DOWN	978.932	5334.02	-2.4459	1.15e-08	6.42e-07	DOWN	sp|Q40459|PSBO_TOBAC	Oxygen-evolving enhancer protein 1, chloroplastic OS=Nicotiana tabacum GN=PSBO PE=2 SV=1	PSBO
MD02G1158600	0.123154	0.66572	0.483609	0.557881	45.892	4.95425	3.2115	0.080863	0.3355	FALSE	27.9103	5.5637	2.3267	0.036465	0.16239	FALSE	31.7537	5.16941	2.6189	0.0020444	0.020149	UP	sp|Q7Y0D4|TR164_ORYSJ	Thioredoxin-like protein HCF164, chloroplastic OS=Oryza sativa subsp. japonica GN=Os03g0767500 PE=2 SV=1	Os03g0767500
MD02G1160500	2.73076	0.61288	0.782357	0.434845	37.476	119.466	-1.6726	0.016985	0.13405	FALSE	50.5264	134.176	-1.409	0.0035724	0.031005	DOWN	26.6311	124.372	-2.2235	0.00019894	0.0030296	DOWN	sp|O07834|DAPB1_PSEMX	Dipeptidyl aminopeptidase BI OS=Pseudoxanthomonas mexicana GN=dapb1 PE=1 SV=1	dapb1
MD02G1160600	1.68525	0.136347	0.25907	0.197882	6.8182	62.0691	-3.1864	0.00020076	0.0064402	DOWN	14.1939	69.6994	-2.2959	0.0002434	0.0039356	DOWN	10.3596	64.5481	-2.6394	0.00027467	0.0039715	DOWN	sp|Q59536|PTRB_MORLA	Protease 2 OS=Moraxella lacunata GN=ptrB PE=3 SV=1	ptrB
MD02G1162000	0	0.526626	1.27616	4.24734	15.7866	0	Inf	0.12769	0.42746	FALSE	39.7541	0	Inf	0.053522	0.20932	FALSE	123.088	0	Inf	2.76e-08	1.38e-06	UP	sp|Q8S8S9|MES1_ARATH	Methylesterase 1 OS=Arabidopsis thaliana GN=MES1 PE=1 SV=1	MES1
MD02G1162200	0.0161963	0.113537	0.498581	4.01793	5.35881	0.514192	3.3815	0.13992	0.44845	FALSE	25.5137	0.578162	5.4637	0.10299	0.32084	FALSE	187.347	0.54176	8.4338	1.15e-08	6.42e-07	UP	sp|Q6RYA0|SABP2_TOBAC	Salicylic acid-binding protein 2 OS=Nicotiana tabacum GN=SABP2 PE=1 SV=1	SABP2
MD02G1162900	4.886	1.99673	0.973746	1.04479	110.946	160.529	-0.53299	0.22749	0.57243	FALSE	47.4752	180.299	-1.9251	2.62e-05	0.00064633	DOWN	49.6815	167.148	-1.7503	0.00076768	0.0091976	DOWN	sp|Q6RYA0|SABP2_TOBAC	Salicylic acid-binding protein 2 OS=Nicotiana tabacum GN=SABP2 PE=1 SV=1	SABP2
MD02G1163100	42.6366	3.58272	4.54355	15.2972	198.65	1533.77	-2.9488	3.71e-07	5.91e-05	DOWN	245.931	1722.83	-2.8085	1.08e-09	1.17e-07	DOWN	794.845	1599.6	-1.009	0.033935	0.17186	FALSE	sp|Q8S9K8|MES10_ARATH	Methylesterase 10 OS=Arabidopsis thaliana GN=MES10 PE=2 SV=1	MES10
MD02G1163400	3.52119	0.937363	1.15907	0.712132	28.505	72.2436	-1.3417	0.061338	0.2875	FALSE	35.1926	81.0884	-1.2042	0.026112	0.12916	FALSE	21.0715	75.0792	-1.8331	0.0038885	0.03368	DOWN	--	--	0
MD02G1163500	262.972	54.5255	66.034	48.157	2885.29	9252.68	-1.6812	0.0018877	0.031936	DOWN	3470.82	10389.1	-1.5817	2.87e-06	0.00010486	DOWN	2446.74	9630.69	-1.9768	1.79e-06	5.41e-05	DOWN	sp|Q84TE9|DOF53_ARATH	Dof zinc finger protein DOF5.3 OS=Arabidopsis thaliana GN=DOF5.3 PE=2 SV=1	DOF5.3
MD02G1164600	5.64613	0.438581	0.693572	0.490875	13.3788	120.74	-3.1739	1.5e-05	0.0009408	DOWN	21.7348	135.595	-2.6412	3.49e-07	1.74e-05	DOWN	15.0818	125.639	-3.0584	5.07e-07	1.8e-05	DOWN	--	--	0
MD02G1164700	23.6466	2.62445	4.48966	5.82422	315.797	1945.36	-2.623	3.37e-06	0.00031369	DOWN	544.906	2185.37	-2.0038	2.12e-06	8.12e-05	DOWN	687.963	2025.61	-1.558	0.00026862	0.0039059	DOWN	sp|Q9FKZ1|DRL42_ARATH	Probable disease resistance protein At5g66900 OS=Arabidopsis thaliana GN=At5g66900 PE=3 SV=1	At5g66900
MD02G1165000	3.21757	0.480004	0.252773	0.0620676	8.1801	35.7633	-2.1283	0.018872	0.1436	FALSE	3.93891	40.1754	-3.3504	0.00055087	0.0073976	DOWN	1.14454	37.3492	-5.0282	1.12e-05	0.00026788	DOWN	sp|Q9SN23|LBD38_ARATH	LOB domain-containing protein 38 OS=Arabidopsis thaliana GN=LBD38 PE=2 SV=1	LBD38
MD02G1165600	9.61902	1.85582	3.65371	3.51929	360.265	1238.95	-1.782	0.0012622	0.024196	DOWN	681.755	1391.77	-1.0296	0.048892	0.19717	FALSE	649.716	1289.75	-0.98922	0.059469	0.25419	FALSE	sp|Q9FKZ1|DRL42_ARATH	Probable disease resistance protein At5g66900 OS=Arabidopsis thaliana GN=At5g66900 PE=3 SV=1	At5g66900
MD02G1165700	12.0122	1.34336	4.43847	5.26156	48.2908	293.155	-2.6018	1.97e-05	0.0011485	DOWN	154.802	329.294	-1.089	0.071162	0.25204	FALSE	185.578	305.042	-0.71698	0.18012	0.51563	FALSE	sp|Q9FKZ1|DRL42_ARATH	Probable disease resistance protein At5g66900 OS=Arabidopsis thaliana GN=At5g66900 PE=3 SV=1	At5g66900
MD02G1165800	5.04514	1.75788	2.56709	0.967395	106.927	197.029	-0.88179	0.12714	0.42666	FALSE	146.801	221.173	-0.59131	0.15948	0.42288	FALSE	53.4695	204.672	-1.9365	0.00020537	0.0031173	DOWN	--	--	0
MD10G1034100	6.34397	0.814237	2.05675	2.67097	70.5308	380.793	-2.4327	5.43e-05	0.0024642	DOWN	182.194	427.629	-1.2309	0.0013295	0.014754	DOWN	228.611	396.472	-0.79433	0.10072	0.3616	FALSE	sp|Q9SRE4|UGAL2_ARATH	UDP-galactose transporter 2 OS=Arabidopsis thaliana GN=UDP-GALT2 PE=2 SV=1	UDP-GALT2
MD09G1156300	1.35799	0.108698	0.249042	0.417349	5.51984	50.0992	-3.1821	0.00074979	0.016698	DOWN	13.4861	56.2616	-2.0607	0.001884	0.019199	DOWN	21.8282	52.1659	-1.2569	0.082683	0.31691	FALSE	sp|O49354|COQ3_ARATH	Ubiquinone biosynthesis O-methyltransferase, mitochondrial OS=Arabidopsis thaliana GN=COQ3 PE=2 SV=2	COQ3
MD02G1168300	26.6431	25.7972	27.6098	42.5817	3519.24	2258.29	0.64003	0.25178	0.60219	FALSE	3577.2	2535.98	0.49628	0.29358	0.60627	FALSE	5354.91	2350.99	1.1876	0.0052422	0.042436	UP	sp|P53681|CRK_DAUCA	CDPK-related protein kinase OS=Daucus carota GN=CRK PE=2 SV=1	CRK
MD02G1169500	3.8896	0.710251	0.86564	1.36837	58.8919	216.734	-1.8798	0.0027929	0.041458	DOWN	72.7641	243.417	-1.7421	2.68e-05	0.00065816	DOWN	111.904	225.725	-1.0123	0.027159	0.14645	FALSE	--	--	0
MD02G1169800	0.756544	0.809772	0.121966	0.0728736	76.3747	37.8315	1.0135	0.80022	0.99282	FALSE	9.21806	42.4853	-2.2044	0.002643	0.024733	DOWN	5.17259	39.3953	-2.9291	0.001066	0.011944	DOWN	sp|Q9SLN8|DBR_TOBAC	2-alkenal reductase (NADP(+)-dependent) OS=Nicotiana tabacum GN=DBR PE=1 SV=1	DBR
MD02G1170300	41.4698	118.003	114.298	59.4903	10921.2	2482.39	2.1373	7.69e-05	0.0031501	UP	10291.7	2787.73	1.8843	1.85e-08	1.38e-06	UP	5156.28	2586.53	0.99531	0.1333	0.43115	FALSE	sp|Q94CL9|KRP7_ARATH	Cyclin-dependent kinase inhibitor 7 OS=Arabidopsis thaliana GN=KRP7 PE=1 SV=2	KRP7
MD02G1171100	32.627	10.0744	2.91035	3.34489	293.136	687.494	-1.2298	0.12456	0.42171	FALSE	89.5429	771.804	-3.1076	2.12e-05	0.00054138	DOWN	105.831	713.271	-2.7527	5.08e-05	0.00095851	DOWN	sp|Q9ZQE6|CML1_ARATH	Calmodulin-like protein 1 OS=Arabidopsis thaliana GN=CML1 PE=2 SV=1	CML1
MD02G1172900	3.68103	0.561101	0.348031	0.273257	57.2259	244.38	-2.0944	0.00032647	0.0092206	DOWN	34.3228	274.455	-2.9993	5.16e-11	8.09e-09	DOWN	25.9935	254.603	-3.292	6.84e-10	5.49e-08	DOWN	sp|O42807|FAEA_ASPNG	Feruloyl esterase A OS=Aspergillus niger GN=faeA PE=1 SV=1	faeA
MD02G1173300	2.04547	0.868026	0.774601	0.276825	40.2456	61.4527	-0.61065	0.55746	0.86751	FALSE	34.5908	68.9904	-0.99601	0.072807	0.25557	FALSE	12.0562	63.8001	-2.4038	0.00055841	0.0070883	DOWN	sp|Q9M2U3|ALPL_ARATH	Protein ALP1-like OS=Arabidopsis thaliana GN=At3g55350 PE=2 SV=1	At3g55350
MD02G1173600	5.36177	42.8616	32.1609	34.9127	2503.39	191.054	3.7118	0.00019027	0.0061986	UP	1798.03	214.729	3.0658	0.00094899	0.011386	UP	1841.99	199.249	3.2086	3.19e-13	5.61e-11	UP	sp|O22042|M3K3_ARATH	Mitogen-activated protein kinase kinase kinase 3 OS=Arabidopsis thaliana GN=ANP3 PE=1 SV=1	ANP3
MD02G1174000	9.53463	1.58332	3.04647	5.50018	161.518	688.144	-2.091	0.00039625	0.010638	DOWN	324.827	772.742	-1.2503	0.00054889	0.0073809	DOWN	564.591	716.439	-0.34364	0.60157	0.91776	FALSE	sp|Q3EDL4|Y1154_ARATH	Probable serine/threonine-protein kinase At1g01540 OS=Arabidopsis thaliana GN=At1g01540 PE=1 SV=2	At1g01540
MD02G1174700	32.6989	80.7948	47.0326	65.0509	6029.29	1436.27	2.0697	0.096089	0.36731	FALSE	3157.5	1613.13	0.96892	0.032053	0.14905	FALSE	4225.38	1496.81	1.4972	0.00034231	0.004749	UP	sp|Q9FH99|FB302_ARATH	F-box protein At5g67140 OS=Arabidopsis thaliana GN=At5g67140 PE=2 SV=1	At5g67140
MD02G1174800	13.1176	1.90425	4.07448	5.4248	188.462	908.02	-2.2685	8.82e-05	0.0034758	DOWN	415.91	1019.6	-1.2937	0.00023815	0.0038753	DOWN	542.526	945.11	-0.80079	0.062183	0.26174	FALSE	sp|Q93XX5|Y5713_ARATH	PI-PLC X domain-containing protein At5g67130 OS=Arabidopsis thaliana GN=At5g67130 PE=1 SV=1	At5g67130
MD17G1234900	10.5844	1.57502	2.93603	6.76477	138.005	611.08	-2.1466	0.0004255	0.011138	DOWN	249.184	686.641	-1.4623	0.011005	0.069893	FALSE	561.704	637.904	-0.18353	0.83902	1	FALSE	sp|Q9LVY1|TAT_ARATH	Tyrosine aminotransferase OS=Arabidopsis thaliana GN=TAT PE=2 SV=1	TAT
MD02G1175900	6.63517	1.51505	2.27186	1.94098	297.538	925.744	-1.6375	0.0045341	0.057494	FALSE	467.744	1039.69	-1.1524	0.0012813	0.014379	DOWN	390.999	963.717	-1.3014	0.0024422	0.023169	DOWN	sp|Q9SLN1|FPP7_ARATH	Filament-like plant protein 7 OS=Arabidopsis thaliana GN=FPP7 PE=3 SV=2	FPP7
MD02G1176500	3.82969	0.982748	1.49841	0.906116	165.603	480.24	-1.536	0.012945	0.11344	FALSE	275.075	539.289	-0.97124	0.013407	0.080723	FALSE	160.334	499.818	-1.6403	0.00049356	0.0063942	DOWN	sp|A0A068FIK2|KN4A_GOSHI	Kinesin-like protein KIN-4A OS=Gossypium hirsutum GN=KIN4A PE=2 SV=1	KIN4A
MD02G1177900	4.0779	0.804561	1.4421	2.90213	82.3222	277.437	-1.7528	0.0047398	0.059098	FALSE	145.813	311.566	-1.0954	0.0047392	0.03814	DOWN	285.12	288.866	-0.018832	0.96407	1	FALSE	sp|Q9LT75|PTN2A_ARATH	Phosphatidylinositol 3,4,5-trisphosphate 3-phosphatase and protein-tyrosine-phosphatase PTEN2A OS=Arabidopsis thaliana GN=PTEN2A PE=1 SV=1	PTEN2A
MD02G1178600	1.66476	0.120291	0.144033	0.145979	15.1271	148.129	-3.2916	7.43e-06	0.00056136	DOWN	17.9247	166.347	-3.2142	1.48e-05	0.00040035	DOWN	17.7935	154.434	-3.1176	0.00011112	0.0018666	DOWN	sp|C0LGS3|Y4372_ARATH	Probable LRR receptor-like serine/threonine-protein kinase At4g37250 OS=Arabidopsis thaliana GN=At4g37250 PE=2 SV=1	At4g37250
MD02G1179300	0.0725681	3.59804	21.1857	50.0561	118.525	1.51389	6.2908	0.10696	0.38983	FALSE	719.119	1.70227	8.7226	0.020094	0.10735	FALSE	1547.97	1.58816	9.9288	6.72e-22	4.6e-19	UP	--	--	0
MD16G1224400	11.827	18.3199	19.5488	15.4152	4990.05	2084.75	1.2592	0.017805	0.13824	FALSE	5192.84	2340.97	1.1494	0.00055741	0.0074422	UP	4034.54	2167.49	0.89638	0.040119	0.1942	FALSE	sp|O53732|UFAA1_MYCTU	Tuberculostearic acid methyltransferase UfaA1 OS=Mycobacterium tuberculosis (strain ATCC 25618 / H37Rv) GN=ufaA1 PE=1 SV=3	ufaA1
MD02G1179600	143.648	553.336	373.002	514.307	36211.3	5665.15	2.6763	0.0037355	0.0506	FALSE	22620.7	6362.63	1.8299	8.17e-05	0.001631	UP	30330.5	5902.75	2.3613	0.00027983	0.0040347	UP	--	--	0
MD02G1179900	8.12685	1.33314	1.57309	4.06119	42.0223	175.419	-2.0616	0.0011795	0.023018	DOWN	50.3097	197.031	-1.9695	1.2e-05	0.00033622	DOWN	128.507	182.699	-0.50763	0.26771	0.63876	FALSE	--	--	0
MD02G1180500	18.3794	28.5109	28.4253	18.9227	3751.04	1540.25	1.2841	0.019621	0.14724	FALSE	3615.58	1729.68	1.0637	0.0015435	0.016568	UP	2311.71	1602.21	0.5289	0.18573	0.52414	FALSE	sp|Q67ZB3|FRL3_ARATH	FRIGIDA-like protein 3 OS=Arabidopsis thaliana GN=FRL3 PE=1 SV=1	FRL3
MD02G1180600	10.3392	10.7349	14.2634	16.3105	1373.02	856.192	0.68135	0.19098	0.52604	FALSE	1793.55	961.531	0.89942	0.010788	0.068913	FALSE	1975.31	891.551	1.1477	0.0049872	0.040781	UP	sp|Q9S9K4|ASPL2_ARATH	Aspartic proteinase-like protein 2 OS=Arabidopsis thaliana GN=At1g65240 PE=1 SV=2	At1g65240
MD02G1180800	10.478	3.9003	3.94415	1.62002	918.235	1608.86	-0.8091	0.10557	0.38687	FALSE	902.975	1806.97	-1.0008	0.003149	0.028242	DOWN	353.806	1674.66	-2.2428	3.04e-07	1.15e-05	DOWN	sp|O22193|PUB4_ARATH	U-box domain-containing protein 4 OS=Arabidopsis thaliana GN=PUB4 PE=1 SV=3	PUB4
MD02G1181000	18.7862	4.54862	4.62127	6.68531	289.505	766.365	-1.4044	0.0072116	0.077712	FALSE	276.649	860.679	-1.6374	0.00035404	0.0052707	DOWN	381.082	798.919	-1.0679	0.13606	0.43698	FALSE	--	--	0
MD02G1181300	14.6296	2.58919	3.50221	3.31209	144.834	559.148	-1.9488	0.00061365	0.014498	DOWN	198.346	627.851	-1.6624	1.02e-05	0.00029294	DOWN	184.83	581.216	-1.6529	0.00013565	0.0022013	DOWN	sp|Q9SZU7|KAI2_ARATH	Probable esterase KAI2 OS=Arabidopsis thaliana GN=KAI2 PE=1 SV=1	KAI2
MD02G1181600	11.7166	2.1602	3.25227	5.2776	155.426	605.386	-1.9616	0.0008066	0.017617	DOWN	246.381	679.939	-1.4645	8.42e-05	0.0016724	DOWN	392.077	630.493	-0.68534	0.13299	0.43054	FALSE	sp|Q2QN36|P2C78_ORYSJ	Probable protein phosphatase 2C 78 OS=Oryza sativa subsp. japonica GN=Os12g0580900 PE=2 SV=1	Os12g0580900
MD02G1182900	5.52772	19.1686	19.8613	17.2906	383.323	70.3284	2.4464	2.97e-05	0.001576	UP	384.065	78.9896	2.2816	1.56e-08	1.2e-06	UP	326.519	73.1985	2.1573	0.00034089	0.0047326	UP	sp|Q42540|UBC7_ARATH	Ubiquitin-conjugating enzyme E2 7 OS=Arabidopsis thaliana GN=UBC7 PE=1 SV=1	UBC7
MD02G1183500	5.23118	1.25671	1.74268	1.51445	218.653	576.178	-1.3979	0.0078753	0.081814	FALSE	286.323	647.15	-1.1765	0.0011655	0.013364	DOWN	239.313	600.465	-1.3272	0.0031406	0.028537	DOWN	sp|O80970|NPY2_ARATH	BTB/POZ domain-containing protein NPY2 OS=Arabidopsis thaliana GN=NPY2 PE=2 SV=1	NPY2
MD02G1184200	17.6679	1.51166	2.60543	3.41715	128.737	1002.97	-2.9618	1.67e-07	3.21e-05	DOWN	217.259	1125.99	-2.3737	1.06e-09	1.16e-07	DOWN	276.412	1042.78	-1.9155	1.36e-05	0.00031446	DOWN	sp|Q8S0F0|FH1_ORYSJ	Formin-like protein 1 OS=Oryza sativa subsp. japonica GN=FH1 PE=2 SV=1	FH1
MD02G1184300	17.3771	1.60385	2.65686	4.47231	79.9091	586.374	-2.8754	9.78e-07	0.00012299	DOWN	131.518	658.311	-2.3235	1.84e-09	1.9e-07	DOWN	218.5	609.532	-1.4801	0.00068292	0.008355	DOWN	sp|Q9FJX6|FH6_ARATH	Formin-like protein 6 OS=Arabidopsis thaliana GN=FH6 PE=2 SV=1	FH6
MD05G1033800	22.8798	28.701	48.7945	85.9929	2883.07	1452.45	0.98912	0.065912	0.29977	FALSE	4665.09	1631.65	1.5156	0.0031993	0.028605	UP	8026.68	1511.36	2.409	7.71e-09	4.47e-07	UP	sp|Q93Z38|TAR4_ARATH	Tryptophan aminotransferase-related protein 4 OS=Arabidopsis thaliana GN=TAR4 PE=2 SV=2	TAR4
MD02G1185900	0.507786	0.830748	1.88617	2.70123	60.4601	26.2027	1.2063	0.20177	0.53987	FALSE	147.254	29.4497	2.322	0.00016393	0.0028815	UP	205.981	27.3447	2.9132	3.18e-08	1.56e-06	UP	sp|Q9SZF7|SHR_ARATH	Protein SHORT-ROOT OS=Arabidopsis thaliana GN=SHR PE=1 SV=1	SHR
MD10G1035700	6.31762	1.76198	1.82451	2.57222	142.281	356.738	-1.3261	0.020876	0.15307	FALSE	146.763	400.56	-1.4485	0.0055804	0.042808	DOWN	216.699	370.642	-0.77433	0.048121	0.22028	FALSE	sp|Q93Z38|TAR4_ARATH	Tryptophan aminotransferase-related protein 4 OS=Arabidopsis thaliana GN=TAR4 PE=2 SV=2	TAR4
MD02G1188600	0.013382	0.0168086	1.05893	4.12933	0.408076	0.257096	0.66653	1	1	FALSE	32.7175	0.289081	6.8224	0.05028	0.20093	FALSE	119.231	0.27088	8.7819	2.91e-08	1.44e-06	UP	sp|Q9SZG3|VQ29_ARATH	VQ motif-containing protein 29 OS=Arabidopsis thaliana GN=VQ29 PE=2 SV=1	VQ29
MD02G1189000	4.45521	17.5789	14.2627	11.3131	1252.9	194.3	2.6889	0.00024915	0.0075326	UP	943.531	218.207	2.1124	8.44e-09	7.07e-07	UP	736.401	202.332	1.8638	0.0022416	0.021641	UP	sp|Q9SY57|P2A10_ARATH	Protein PHLOEM PROTEIN 2-LIKE A10 OS=Arabidopsis thaliana GN=PP2A10 PE=2 SV=1	PP2A10
MD10G1035800	16.6177	93.1378	134.092	322.162	8257.34	931.632	3.1478	0.19779	0.53473	FALSE	12011.4	1047.51	3.5194	0.11426	0.3439	FALSE	27203.8	976.208	4.8005	7.04e-05	0.001269	UP	sp|Q93Z38|TAR4_ARATH	Tryptophan aminotransferase-related protein 4 OS=Arabidopsis thaliana GN=TAR4 PE=2 SV=2	TAR4
MD06G1169600	0.688353	0.139903	0.131843	0.184584	15.1677	46.0137	-1.6011	0.039814	0.22653	FALSE	13.5638	51.6695	-1.9296	0.004253	0.035258	DOWN	17.8443	47.9314	-1.4255	0.045749	0.21299	FALSE	sp|Q94A02|TAR2_ARATH	Tryptophan aminotransferase-related protein 2 OS=Arabidopsis thaliana GN=TAR2 PE=2 SV=1	TAR2
MD02G1190100	1.59707	1.66665	5.69107	26.4162	75.5268	45.6793	0.72545	0.43872	0.78357	FALSE	258.765	51.3089	2.3344	0.18193	0.45873	FALSE	1116.45	47.572	4.5527	2.23e-13	4.14e-11	UP	sp|Q9LSI9|BIR2_ARATH	Inactive LRR receptor-like serine/threonine-protein kinase BIR2 OS=Arabidopsis thaliana GN=BIR2 PE=1 SV=1	BIR2
MD15G1196200	4.85156	2.16045	1.55609	1.01567	172.259	247.473	-0.52269	0.28927	0.64478	FALSE	118.281	277.914	-1.2324	0.0023837	0.022878	DOWN	74.1175	257.787	-1.7983	0.00027953	0.0040332	DOWN	sp|P23796|RIT1_YEAST	tRNA A64-2&apos;-O-ribosylphosphate transferase OS=Saccharomyces cerevisiae (strain ATCC 204508 / S288c) GN=RIT1 PE=1 SV=3	RIT1
MD17G1055800	27.6973	74.7932	83.7494	75.5955	6099.88	1430.05	2.0927	0.0001664	0.0056278	UP	6576.12	1605.55	2.0342	1.91e-07	1.04e-05	UP	5739.11	1486.27	1.9491	0.02041	0.11901	FALSE	sp|O67577|TRMH_AQUAE	tRNA (guanosine(18)-2&apos;-O)-methyltransferase OS=Aquifex aeolicus (strain VF5) GN=trmH PE=1 SV=1	trmH
MD04G1225400	33.5857	53.2117	140.422	1008.21	2324.08	896.204	1.3748	0.34792	0.7022	FALSE	5901.58	1007.68	2.5501	0.16481	0.4321	FALSE	40862.8	939.457	5.4428	0.0011818	0.012978	UP	sp|P29063|PR4B_TOBAC	Pathogenesis-related protein PR-4B OS=Nicotiana tabacum PE=2 SV=1	2
MD02G1232000	5.51307	0.721432	1.20619	1.50986	41.4839	239.012	-2.5265	0.00010543	0.0039971	DOWN	76.6849	268.447	-1.8076	2.06e-05	0.00052828	DOWN	93.3264	248.727	-1.4142	0.0044663	0.037522	DOWN	sp|P73161|TRMB_SYNY3	tRNA (guanine-N(7)-)-methyltransferase OS=Synechocystis sp. (strain PCC 6803 / Kazusa) GN=trmB PE=3 SV=2	trmB
MD02G1192800	9.52765	1.72128	2.96822	6.17249	126.325	422.482	-1.7418	0.001085	0.021765	DOWN	197.203	474.232	-1.2659	0.0034247	0.030072	DOWN	392.887	438.961	-0.15998	0.80238	0.99959	FALSE	sp|P46604|HAT22_ARATH	Homeobox-leucine zipper protein HAT22 OS=Arabidopsis thaliana GN=HAT22 PE=1 SV=1	HAT22
MD02G1193500	0.892054	0	0.0732517	0.100665	0	16.6946	#NAME?	0.00085671	0.018415	DOWN	2.03468	18.7543	-3.2043	0.0070619	0.050777	FALSE	2.58294	17.3866	-2.7509	0.0372	0.1839	FALSE	--	--	0
MD02G1193600	8.1689	0.359748	0.696687	1.07278	19.8653	267.781	-3.7527	0.00082901	0.017962	DOWN	33.052	300.907	-3.1865	0.0039168	0.033218	DOWN	50.1108	278.807	-2.4761	0.018547	0.11078	FALSE	sp|Q6AWW5|Y5262_ARATH	Ankyrin repeat-containing protein At5g02620 OS=Arabidopsis thaliana GN=At5g02620 PE=1 SV=1	At5g02620
MD02G1194100	17.2951	3.66993	5.4413	6.8282	710.541	2364.72	-1.7347	0.0019518	0.032537	DOWN	1113.77	2655.68	-1.2536	0.00020887	0.0034865	DOWN	1344.93	2460.1	-0.87118	0.03982	0.19321	FALSE	sp|C0LGX3|HSL2_ARATH	LRR receptor-like serine/threonine-protein kinase HSL2 OS=Arabidopsis thaliana GN=HSL2 PE=2 SV=1	HSL2
MD02G1194500	72.0533	176.313	147.115	133.945	17130.2	4216.71	2.0224	0.016908	0.1337	FALSE	13314.4	4736.5	1.4911	0.013078	0.079253	FALSE	11615.6	4394.54	1.4023	0.0017858	0.01803	UP	sp|P19446|MDHG_CITLA	Malate dehydrogenase, glyoxysomal OS=Citrullus lanatus PE=1 SV=1	1
MD02G1194600	47.3074	9.52747	11.4864	6.60406	1517.72	5725.16	-1.9154	0.0043955	0.056351	FALSE	2005.56	6429.23	-1.6806	0.00016491	0.0028962	DOWN	1107.52	5964.91	-2.4292	3.85e-06	0.00010527	DOWN	sp|O49545|BAME1_ARATH	Leucine-rich repeat receptor-like serine/threonine-protein kinase BAM1 OS=Arabidopsis thaliana GN=BAM1 PE=1 SV=1	BAM1
MD01G1034300	45.7025	51.5232	75.5939	48.1907	7450.91	4479.18	0.73418	0.11318	0.40184	FALSE	11041.9	5030.38	1.1342	0.0005713	0.0075795	UP	6832.09	4660.47	0.55185	0.13956	0.44363	FALSE	sp|Q5ZLV4|NSUN2_CHICK	tRNA (cytosine(34)-C(5))-methyltransferase OS=Gallus gallus GN=NSUN2 PE=2 SV=1	NSUN2
MD02G1195400	5.33362	1.76284	1.51487	1.40408	219.104	464.445	-1.0839	0.056899	0.27557	FALSE	196.288	521.58	-1.4099	0.00018713	0.0032037	DOWN	171.974	483.311	-1.4908	0.0017726	0.01793	DOWN	sp|Q93ZQ5|SPXM3_ARATH	SPX domain-containing membrane protein At4g22990 OS=Arabidopsis thaliana GN=At4g22990 PE=2 SV=2	At4g22990
MD02G1195500	44.1784	68.2574	66.812	37.4928	5575.77	2292.01	1.2826	0.017754	0.13798	FALSE	5236.64	2573.61	1.0248	0.0020933	0.020736	UP	2829.94	2384.82	0.24689	0.52423	0.87397	FALSE	sp|A7RQM5|ASNA_NEMVE	ATPase ASNA1 homolog OS=Nematostella vectensis GN=v1g161623 PE=3 SV=1	v1g161623
MD02G1196000	0.621085	0.0705283	0.116804	0.169901	6.60248	38.0783	-2.5279	0.0067449	0.074355	FALSE	10.5983	42.757	-2.0123	0.0054203	0.041964	DOWN	15.2181	39.5865	-1.3792	0.062715	0.26312	FALSE	--	--	0
MD02G1196200	22.5539	5.54064	8.27305	10.4271	305.143	840.116	-1.4611	0.0090575	0.090033	FALSE	454.704	943.239	-1.0527	0.0034299	0.030112	DOWN	563.538	873.798	-0.63279	0.13261	0.43007	FALSE	sp|Q93V66|FAX1_ARATH	Protein FATTY ACID EXPORT 1, chloroplastic OS=Arabidopsis thaliana GN=FAX1 PE=1 SV=1	FAX1
MD02G1196600	2.41712	3.38602	4.12687	3.0967	229.672	105.096	1.1279	0.050645	0.26015	FALSE	270.124	118.04	1.1944	0.0027568	0.02555	UP	196.509	109.44	0.84446	0.071439	0.28774	FALSE	--	--	0
MD02G1197400	21.9595	3.99334	6.68358	7.01449	308.074	1030.73	-1.7423	0.00059289	0.014147	DOWN	456.12	1157.19	-1.3431	0.0083805	0.057298	FALSE	470.012	1070.04	-1.1869	0.010774	0.073899	FALSE	sp|O64645|SOC1_ARATH	MADS-box protein SOC1 OS=Arabidopsis thaliana GN=SOC1 PE=1 SV=1	SOC1
MD02G1197700	38.3847	14.4254	14.6376	18.7068	747.167	1283.52	-0.7806	0.14499	0.45643	FALSE	731.801	1441.58	-0.97813	0.0044388	0.036376	DOWN	908.189	1336.69	-0.5576	0.18566	0.52409	FALSE	sp|O64644|SAP18_ARATH	Histone deacetylase complex subunit SAP18 OS=Arabidopsis thaliana GN=At2g45640 PE=1 SV=1	At2g45640
MD02G1198400	12.0271	5.18165	24.9996	97.0427	285.127	415.079	-0.54178	0.50054	0.8276	FALSE	1251.43	466.295	1.4243	0.11842	0.35215	FALSE	4927.85	432.766	3.5093	1.18e-09	8.75e-08	UP	sp|O64640|CXE8_ARATH	Probable carboxylesterase 8 OS=Arabidopsis thaliana GN=CXE8 PE=2 SV=1	CXE8
MD02G1199100	1.18272	3.15467	4.67179	5.46434	262.398	61.4473	2.0943	0.0057573	0.067232	FALSE	375.321	69.0463	2.4425	0.0017621	0.018324	UP	418.671	64.0877	2.7077	8.96e-09	5.11e-07	UP	sp|Q39214|RPM1_ARATH	Disease resistance protein RPM1 OS=Arabidopsis thaliana GN=RPM1 PE=1 SV=1	RPM1
MD02G1201500	0.662276	0.824735	1.67722	1.06077	64.4205	37.8183	0.76844	0.3811	0.73482	FALSE	143.303	42.4595	1.7549	0.00021402	0.0035564	UP	84.9258	39.308	1.1114	0.22341	0.58014	FALSE	--	--	0
MD02G1204100	3.47455	4.39085	7.67713	13.8052	161.769	84.2224	0.94166	0.42237	0.77026	FALSE	299.468	94.669	1.6614	0.38392	0.70481	FALSE	501.037	87.9447	2.5103	0.00013401	0.0021791	UP	--	--	0
MD02G1205300	11.394	13.7617	3.46788	6.92168	1397.43	660.78	1.0805	0.5693	0.8753	FALSE	303.34	742.085	-1.2906	0.00020475	0.0034298	DOWN	596.845	687.851	-0.20474	0.5031	0.85883	FALSE	--	--	0
MD02G1205600	0.592745	0.122157	0.141585	0.365027	17.1388	63.5891	-1.8915	0.018522	0.14181	FALSE	22.5351	71.3839	-1.6634	0.005623	0.042987	DOWN	54.6181	66.1258	-0.27583	0.90254	1	FALSE	sp|Q9LYN8|EMS1_ARATH	Leucine-rich repeat receptor protein kinase EMS1 OS=Arabidopsis thaliana GN=EMS1 PE=1 SV=1	EMS1
MD02G1205700	52.3079	9.33228	14.6509	22.0348	261.715	921.111	-1.8154	0.00069809	0.015886	DOWN	385.709	1034.45	-1.4233	3.31e-05	0.00077769	DOWN	579.833	958.129	-0.72458	0.047936	0.21977	FALSE	sp|O22150|SAU36_ARATH	Auxin-responsive protein SAUR36 OS=Arabidopsis thaliana GN=SAUR36 PE=2 SV=1	SAUR36
MD02G1205800	3.35678	0.95173	0.897622	1.50893	49.52	111.149	-1.1664	0.056712	0.27525	FALSE	43.2434	124.822	-1.5293	0.0018621	0.019038	DOWN	72.4814	115.71	-0.67483	0.20353	0.5506	FALSE	sp|O22151|GOS12_ARATH	Golgi SNAP receptor complex member 1-2 OS=Arabidopsis thaliana GN=GOS12 PE=1 SV=2	GOS12
MD15G1321500	7.69384	9.21332	12.429	4.97227	296.115	168.759	0.81119	0.10704	0.38992	FALSE	413.214	189.492	1.1247	0.0037522	0.032145	UP	157.062	175.465	-0.15985	0.80514	1	FALSE	sp|Q5ZLV4|NSUN2_CHICK	tRNA (cytosine(34)-C(5))-methyltransferase OS=Gallus gallus GN=NSUN2 PE=2 SV=1	NSUN2
MD15G1321600	13.5786	15.3072	19.8051	11.9928	1892.98	1124.57	0.75129	0.11839	0.41079	FALSE	2487.06	1262.69	0.97794	0.0038376	0.032691	UP	1439.71	1169.08	0.30041	0.42902	0.80462	FALSE	sp|Q5ZLV4|NSUN2_CHICK	tRNA (cytosine(34)-C(5))-methyltransferase OS=Gallus gallus GN=NSUN2 PE=2 SV=1	NSUN2
MD02G1207900	0.01841	124.877	84.3435	192.375	10970	0.95837	13.483	7.81e-07	0.00010302	UP	7332.44	1.07565	12.735	0.013069	0.079243	FALSE	15627.9	0.991401	13.944	3.13e-07	1.18e-05	UP	sp|O04887|PME2_CITSI	Pectinesterase 2 OS=Citrus sinensis GN=PECS-2.1 PE=2 SV=1	PECS-2.1
MD02G1209600	1.60822	0.586264	0.405462	1.40031	37.6607	60.3578	-0.68048	0.24811	0.59681	FALSE	22.3256	67.7924	-1.6024	0.006683	0.04868	DOWN	77.1939	62.9653	0.29393	0.68125	0.95591	FALSE	sp|Q84WW5|VAP13_ARATH	Vesicle-associated protein 1-3 OS=Arabidopsis thaliana GN=PVA13 PE=2 SV=1	PVA13
MD02G1216600	1.60991	0.168606	0.469238	1.45215	16.0654	116.554	-2.859	0.00011182	0.0041618	DOWN	49.825	130.937	-1.3939	0.0036824	0.031754	DOWN	146.234	121.558	0.26663	0.65557	0.94284	FALSE	--	--	0
MD02G1216900	12.9895	22.5554	25.3303	24.9383	353.004	126.143	1.4846	0.035534	0.21138	FALSE	380.476	141.656	1.4254	0.0096572	0.063399	FALSE	352.24	131.261	1.4241	0.0013582	0.014474	UP	sp|Q9FNX5|DRP1E_ARATH	Dynamin-related protein 1E OS=Arabidopsis thaliana GN=DRP1E PE=1 SV=1	DRP1E
MD02G1218100	36.1611	75.4866	58.2852	38.1969	5872.81	1741.78	1.7535	0.0018744	0.031852	UP	4271.9	1956.01	1.127	0.00085058	0.010437	UP	2682	1813.4	0.56462	0.15551	0.47321	FALSE	sp|Q0WWQ1|ATG3_ARATH	Autophagy-related protein 3 OS=Arabidopsis thaliana GN=ATG3 PE=1 SV=2	ATG3
MD02G1222400	1.3556	1.23667	1.77757	4.73189	117.433	79.8099	0.5572	0.37739	0.73094	FALSE	162.263	89.6363	0.85618	0.41922	0.73635	FALSE	416.894	83.1701	2.3255	8.71e-05	0.0015231	UP	sp|Q9LTC0|PBL19_ARATH	Probable serine/threonine-protein kinase PBL19 OS=Arabidopsis thaliana GN=PBL19 PE=1 SV=1	PBL19
MD02G1222600	12.7074	2.00075	2.1791	5.35163	83.6529	359.811	-2.1048	0.00028685	0.0083624	DOWN	93.8102	404.08	-2.1068	5.59e-06	0.00017821	DOWN	217.517	374.98	-0.78569	0.096387	0.35147	FALSE	--	--	0
MD02G1223400	25.503	8.06539	9.79192	9.86206	308.944	631.524	-1.0315	0.052278	0.26411	FALSE	358.375	709.28	-0.98489	0.0065804	0.048156	DOWN	353.385	657.045	-0.89475	0.039613	0.1925	FALSE	sp|Q9M1C2|CH101_ARATH	10 kDa chaperonin 1, chloroplastic OS=Arabidopsis thaliana GN=CPN10-1 PE=2 SV=1	CPN10-1
MD02G1224100	0	0.00642394	0.0211377	0	0.375871	0	Inf	0.94403	1	FALSE	1.05112	0	Inf	0.65219	0.90962	FALSE	0	0	NA	NA	NA	NA	sp|C0LGP4|Y3475_ARATH	Probable LRR receptor-like serine/threonine-protein kinase At3g47570 OS=Arabidopsis thaliana GN=At3g47570 PE=2 SV=1	At3g47570
MD02G1226200	5.65624	8.23523	8.06714	20.3271	422.932	185.88	1.1861	0.025575	0.17242	FALSE	412.402	208.871	0.98144	0.17637	0.45024	FALSE	984.244	194.256	2.3411	0.00016759	0.0026264	UP	sp|Q9ZVJ5|SGGP_ARATH	Haloacid dehalogenase-like hydrolase domain-containing protein Sgpp OS=Arabidopsis thaliana GN=SGPP PE=1 SV=2	SGPP
MD02G1226400	0.322295	2.96341	2.70006	2.86228	209.556	14.7497	3.8286	1.4e-08	4.6e-06	UP	184.991	16.5621	3.4815	2.4e-09	2.36e-07	UP	188.557	15.3604	3.6177	3.83e-11	4.12e-09	UP	sp|Q9ZVJ5|SGGP_ARATH	Haloacid dehalogenase-like hydrolase domain-containing protein Sgpp OS=Arabidopsis thaliana GN=SGPP PE=1 SV=2	SGPP
MD02G1226500	14.6444	27.2096	29.011	40.2726	3000.27	1025.22	1.5492	0.0032696	0.045886	UP	3153.59	1151.39	1.4536	0.033734	0.15433	FALSE	4192.13	1067.29	1.9737	3.58e-06	9.9e-05	UP	sp|Q9FNX5|DRP1E_ARATH	Dynamin-related protein 1E OS=Arabidopsis thaliana GN=DRP1E PE=1 SV=1	DRP1E
MD02G1226700	55.8982	14.861	20.016	19.4945	1822.31	4555.62	-1.3219	0.015383	0.12626	FALSE	2414.25	5116.43	-1.0836	0.0015098	0.016307	DOWN	2283.33	4742.41	-1.0545	0.012487	0.082735	FALSE	sp|P37221|MAOM_SOLTU	NAD-dependent malic enzyme 62 kDa isoform, mitochondrial OS=Solanum tuberosum PE=1 SV=1	1
MD02G1228400	0	0.00599625	0.00546781	0	0.408076	0	Inf	0.94405	1	FALSE	0.491781	0	Inf	0.96344	1	FALSE	0	0	NA	NA	NA	NA	sp|Q94BQ2|PRS8B_ARATH	26S protease regulatory subunit 8 homolog B OS=Arabidopsis thaliana GN=RPT6B PE=1 SV=1	RPT6B
MD02G1228800	0.0253443	0.0904905	1.08542	4.15793	11.2858	1.97241	2.5165	0.30578	0.66158	FALSE	118.34	2.21587	5.7389	0.022338	0.11577	FALSE	481.884	2.05636	7.8724	1.95e-09	1.38e-07	UP	sp|Q9LQL2|PTR14_ARATH	Protein NRT1/ PTR FAMILY 7.3 OS=Arabidopsis thaliana GN=NPF7.3 PE=1 SV=2	NPF7.3
MD16G1061900	21.0569	5.18251	8.25841	10.6092	506.397	1423.17	-1.4908	0.011736	0.10653	FALSE	835.528	1598.14	-0.93564	0.0050738	0.040089	DOWN	1033.86	1480.21	-0.51776	0.23765	0.59939	FALSE	sp|P11869|TPT_SPIOL	Triose phosphate/phosphate translocator, chloroplastic OS=Spinacia oleracea PE=1 SV=1	1
MD02G1231800	31.3942	8.08726	10.9527	9.96808	411.811	1069.05	-1.3763	0.012219	0.10944	FALSE	551.101	1200.46	-1.1232	0.0014663	0.01593	DOWN	495.531	1111.85	-1.1659	0.0045816	0.038248	DOWN	sp|Q08747|UAF30_YEAST	Upstream activation factor subunit UAF30 OS=Saccharomyces cerevisiae (strain ATCC 204508 / S288c) GN=UAF30 PE=1 SV=1	UAF30
MD10G1289000	14.8654	5.45362	5.41299	5.59992	467.782	812.342	-0.79625	0.10947	0.3952	FALSE	439.448	912.19	-1.0536	0.0026403	0.024718	DOWN	432.548	845.165	-0.96637	0.038966	0.19023	FALSE	sp|P21727|TPT_PEA	Triose phosphate/phosphate translocator, chloroplastic OS=Pisum sativum PE=1 SV=1	1
MD02G1232200	13.5828	2.31118	1.60382	1.13876	114.714	436.998	-1.9296	0.0042157	0.054899	FALSE	77.0496	490.425	-2.6702	0.0003465	0.0051774	DOWN	56.103	453.443	-3.0148	6.62e-05	0.0012063	DOWN	--	--	0
MD02G1232400	91.4276	29.8238	6.38161	5.19054	1190.54	2399.23	-1.011	0.063606	0.29343	FALSE	244.169	2693.49	-3.4635	1.45e-15	5.73e-13	DOWN	196.263	2494.25	-3.6677	2.58e-16	7.79e-14	DOWN	--	--	0
MD02G1234800	0.194598	0	0.00485925	0.00887243	0	11.7117	#NAME?	0.0063904	0.071836	FALSE	0.491781	13.1584	-4.7418	0.0048826	0.038948	DOWN	0.729754	12.1801	-4.061	0.023799	0.13309	FALSE	sp|P93604|LRK10_WHEAT	Rust resistance kinase Lr10 OS=Triticum aestivum GN=LRK10 PE=2 SV=1	LRK10
MD16G1193600	0	0.00914145	0.0079868	0	0.568667	0	Inf	0.94415	1	FALSE	0.350372	0	Inf	0.96342	1	FALSE	0	0	NA	NA	NA	NA	sp|Q9LQ16|PPR94_ARATH	Pentatricopeptide repeat-containing protein At1g62910 OS=Arabidopsis thaliana GN=At1g62910 PE=2 SV=1	At1g62910
MD02G1237300	1.60398	0.131372	0.529694	0.42966	7.66612	64.6978	-3.0771	0.00025427	0.0076348	DOWN	30.0385	72.6986	-1.2751	0.12905	0.3705	FALSE	25.7562	67.4263	-1.3884	0.021134	0.12222	FALSE	--	--	0
MD12G1018900	19.556	3.29354	5.2201	3.65215	343.363	1416.91	-2.0449	0.00026515	0.0078764	DOWN	565.611	1591.17	-1.4922	5.84e-05	0.0012402	DOWN	376.275	1475.81	-1.9716	6.75e-06	0.00017138	DOWN	sp|Q9LZS0|PTL_ARATH	Trihelix transcription factor PTL OS=Arabidopsis thaliana GN=PTL PE=2 SV=1	PTL
MD02G1241700	4.26751	1.15847	1.45237	1.12844	104.989	285.295	-1.4422	0.021815	0.15721	FALSE	140.126	320.346	-1.1929	0.0047945	0.038464	DOWN	104.79	296.456	-1.5003	0.0055375	0.044312	DOWN	--	--	0
MD02G1243400	10.7989	42.6566	26.8082	13.4902	982.77	149.64	2.7154	0.012759	0.11238	FALSE	564.577	168.046	1.7483	3.07e-06	0.00011034	UP	273.587	155.77	0.81258	0.075158	0.29741	FALSE	--	--	0
MD14G1016900	24.3028	8.07961	11.8437	6.43677	798.898	1773.35	-1.1504	0.091035	0.35753	FALSE	1267.62	1991.36	-0.65162	0.080466	0.27338	FALSE	660.709	1846.66	-1.4828	0.00090637	0.010513	DOWN	sp|Q9LZS0|PTL_ARATH	Trihelix transcription factor PTL OS=Arabidopsis thaliana GN=PTL PE=2 SV=1	PTL
MD02G1246100	4.69011	1.02661	1.09817	0.96534	104.017	331.769	-1.6734	0.0045553	0.057628	FALSE	116.533	372.721	-1.6774	2.38e-05	0.00059855	DOWN	99.2496	345.745	-1.8006	0.00010832	0.0018301	DOWN	sp|P93604|LRK10_WHEAT	Rust resistance kinase Lr10 OS=Triticum aestivum GN=LRK10 PE=2 SV=1	LRK10
MD02G1246200	14.0635	3.07417	2.90491	2.14414	122.017	376.364	-1.625	0.0048598	0.060083	FALSE	115.363	422.754	-1.8736	2.4e-06	8.99e-05	DOWN	84.4452	391.87	-2.2143	1.37e-06	4.3e-05	DOWN	sp|P0CH01|AT21A_ARATH	Putative RING-H2 finger protein ATL21A OS=Arabidopsis thaliana GN=ATL21A PE=3 SV=1	ATL21A
MD02G1247200	10.7273	1.6082	2.51824	2.99338	147.822	674.203	-2.1893	0.00019139	0.00623	DOWN	235.101	757.208	-1.6874	0.00016337	0.0028729	DOWN	268.138	700.913	-1.3863	0.011641	0.07838	FALSE	sp|P93604|LRK10_WHEAT	Rust resistance kinase Lr10 OS=Triticum aestivum GN=LRK10 PE=2 SV=1	LRK10
MD02G1247900	11.2104	1.75521	3.72044	4.06352	138.527	630.074	-2.1854	0.00021025	0.0066684	DOWN	303.807	707.397	-1.2194	0.0010806	0.012578	DOWN	325.27	655.101	-1.0101	0.0269	0.14552	FALSE	sp|Q9SN28|ATL7_ARATH	RING-H2 finger protein ATL7 OS=Arabidopsis thaliana GN=ATL7 PE=2 SV=1	ATL7
MD02G1248800	0	0.076617	0.0313964	0	2.57684	0	Inf	0.2752	0.62964	FALSE	1.09353	0	Inf	0.64586	0.90685	FALSE	0	0	NA	NA	NA	NA	--	--	0
MD02G1249400	0.409734	6.10118	2.3713	2.55398	670.13	24.8501	4.7531	0.064057	0.29469	FALSE	233.138	27.932	3.0612	0.20646	0.49416	FALSE	230.359	25.9058	3.1525	2.34e-09	1.59e-07	UP	sp|P93604|LRK10_WHEAT	Rust resistance kinase Lr10 OS=Triticum aestivum GN=LRK10 PE=2 SV=1	LRK10
MD02G1249800	23.5316	45.6114	45.0473	44.7199	4987.74	1619.95	1.6224	0.0028412	0.04187	UP	4701.17	1819.91	1.3691	5.32e-05	0.0011518	UP	4512.01	1689.18	1.4174	0.00046246	0.006064	UP	sp|P93604|LRK10_WHEAT	Rust resistance kinase Lr10 OS=Triticum aestivum GN=LRK10 PE=2 SV=1	LRK10
MD02G1249900	6.45314	14.7944	11.7927	7.55895	2194.19	585.706	1.9054	0.0054194	0.064751	FALSE	1621.32	657.726	1.3016	0.00015974	0.0028224	UP	1004.35	609.413	0.72077	0.11354	0.39042	FALSE	--	--	0
MD02G1250200	1.557	0.342218	0.291347	0.255225	13.9249	43.0758	-1.6292	0.052652	0.26489	FALSE	11.8018	48.4054	-2.0362	0.004154	0.03463	DOWN	10.1243	44.963	-2.1509	0.0066478	0.051232	FALSE	sp|P0CH01|AT21A_ARATH	Putative RING-H2 finger protein ATL21A OS=Arabidopsis thaliana GN=ATL21A PE=3 SV=1	ATL21A
MD02G1250400	11.7135	2.93103	3.42907	5.02264	345.494	856.476	-1.3098	0.009864	0.095625	FALSE	374.134	961.555	-1.3618	8.26e-05	0.001645	DOWN	531.5	890.209	-0.74407	0.079245	0.30818	FALSE	sp|P93604|LRK10_WHEAT	Rust resistance kinase Lr10 OS=Triticum aestivum GN=LRK10 PE=2 SV=1	LRK10
MD02G1251000	15.7572	3.29629	4.01347	2.50163	301.673	985.618	-1.708	0.0033899	0.0472	DOWN	358.351	1107.22	-1.6275	0.0061321	0.045763	DOWN	225.38	1025.9	-2.1865	4.03e-05	0.00079	DOWN	sp|P93604|LRK10_WHEAT	Rust resistance kinase Lr10 OS=Triticum aestivum GN=LRK10 PE=2 SV=1	LRK10
MD02G1252000	9.20095	2.05086	2.38586	1.77273	190.896	579.717	-1.6026	0.0061292	0.069912	FALSE	213.641	651.069	-1.6076	0.0018859	0.019214	DOWN	163.532	602.77	-1.882	1.54e-05	0.00034953	DOWN	sp|P93604|LRK10_WHEAT	Rust resistance kinase Lr10 OS=Triticum aestivum GN=LRK10 PE=2 SV=1	LRK10
MD02G1252500	0.380629	0.84792	0.804105	1.0295	67.5147	19.3355	1.8039	0.015605	0.12738	FALSE	62.0037	21.7076	1.5142	0.010306	0.066564	FALSE	77.8976	20.1119	1.9535	0.002482	0.023487	UP	sp|Q5Z8V9|HEM2_ORYSJ	Delta-aminolevulinic acid dehydratase, chloroplastic OS=Oryza sativa subsp. japonica GN=HEMB PE=2 SV=1	HEMB
MD02G1252900	0.299652	0.528528	0.500707	0.769592	50.4769	18.1103	1.4788	0.062971	0.29191	FALSE	45.9482	20.335	1.176	0.075563	0.26167	FALSE	68.1335	18.8393	1.8546	0.0038761	0.033608	UP	sp|P93604|LRK10_WHEAT	Rust resistance kinase Lr10 OS=Triticum aestivum GN=LRK10 PE=2 SV=1	LRK10
MD02G1253800	0.88438	0.34252	0.896418	1.72192	31.4921	53.9162	-0.77573	0.35104	0.7048	FALSE	83.7626	60.5569	0.46801	0.54532	0.83862	FALSE	151.34	56.1186	1.4312	0.0043797	0.036915	UP	sp|P93604|LRK10_WHEAT	Rust resistance kinase Lr10 OS=Triticum aestivum GN=LRK10 PE=2 SV=1	LRK10
MD02G1254300	76.9225	15.6003	18.5479	13.9986	1413.68	4633.27	-1.7126	0.0015958	0.028512	DOWN	1581.47	5203.23	-1.7181	0.00094684	0.011365	DOWN	1231.42	4816.15	-1.9676	1.49e-06	4.62e-05	DOWN	sp|P93604|LRK10_WHEAT	Rust resistance kinase Lr10 OS=Triticum aestivum GN=LRK10 PE=2 SV=1	LRK10
MD04G1221900	1.99355	0.0170118	0.0880709	0.35475	1.94377	159.068	-6.3546	3.76e-08	1.01e-05	DOWN	9.84889	178.637	-4.1809	9.96e-06	0.00028799	DOWN	38.9285	165.18	-2.0851	0.025311	0.13942	FALSE	sp|Q8H181|GTL2_ARATH	Trihelix transcription factor GTL2 OS=Arabidopsis thaliana GN=At5g28300 PE=2 SV=1	At5g28300
MD02G1256300	59.8831	52.9552	93.1026	137.035	4613.41	3629.08	0.34623	0.47355	0.80819	FALSE	8667.47	4075.83	1.0885	0.012925	0.078683	FALSE	12167.7	3776.54	1.6879	3.39e-05	0.00068285	UP	sp|F4JCU3|MVD2_ARATH	Diphosphomevalonate decarboxylase MVD2, peroxisomal OS=Arabidopsis thaliana GN=MVD2 PE=1 SV=1	MVD2
MD02G1256400	0.618917	1.43448	1.44215	1.9961	42.0233	10.8624	1.9519	0.054042	0.26784	FALSE	39.8914	12.213	1.7077	0.17218	0.44366	FALSE	52.3046	11.3976	2.1982	0.0058759	0.046504	UP	sp|Q9SSJ8|FAB1C_ARATH	Putative 1-phosphatidylinositol-3-phosphate 5-kinase FAB1C OS=Arabidopsis thaliana GN=FAB1C PE=2 SV=1	FAB1C
MD05G1297900	0.00533609	0.0496705	0.0721407	0.235596	3.48918	0.242753	3.8453	0.27432	0.62844	FALSE	5.07412	0.272973	4.2163	0.13712	0.38562	FALSE	16.3185	0.252322	6.0151	0.00058233	0.0073361	UP	sp|C0LGT6|EFR_ARATH	LRR receptor-like serine/threonine-protein kinase EFR OS=Arabidopsis thaliana GN=EFR PE=1 SV=1	EFR
MD02G1258400	395.208	536.045	733.691	528.408	52549.5	25161.9	1.0624	0.043211	0.23698	FALSE	69593.2	28253.4	1.3005	7.31e-05	0.0014928	UP	48778.8	26180	0.89779	0.020361	0.11886	FALSE	sp|Q04960|DNJH_CUCSA	DnaJ protein homolog OS=Cucumis sativus GN=DNAJ1 PE=2 SV=1	DNAJ1
MD02G1258700	0.203132	4.65399	5.5871	4.81398	215.773	6.05094	5.1562	6.57e-13	1.12e-09	UP	250.321	6.80083	5.2019	4.39e-23	8.51e-20	UP	212.665	6.34438	5.067	8e-11	8.04e-09	UP	sp|Q9M2E2|SDR1_ARATH	(+)-neomenthol dehydrogenase OS=Arabidopsis thaliana GN=SDR1 PE=1 SV=1	SDR1
MD02G1259200	69.9935	90.9521	100.776	77.2581	12536.5	6206.11	1.0144	0.052262	0.2641	FALSE	13501.6	6969.96	0.95391	0.0040261	0.033873	UP	10017.8	6457.51	0.63352	0.1148	0.39293	FALSE	sp|Q8RY59|RCD1_ARATH	Inactive poly [ADP-ribose] polymerase RCD1 OS=Arabidopsis thaliana GN=RCD1 PE=1 SV=1	RCD1
MD02G1259600	5.35234	12.9729	22.7324	15.4014	1740.26	496.998	1.808	0.012804	0.11258	FALSE	3136.18	558.321	2.4898	6.56e-13	1.44e-10	UP	2055.85	518.433	1.9875	1.15e-05	0.00027225	UP	sp|A7LXU3|BGH3B_BACO1	Beta-glucosidase BoGH3B OS=Bacteroides ovatus (strain ATCC 8483 / DSM 1896 / JCM 5824 / NCTC 11153) GN=BACOVA_02659 PE=1 SV=1	BACOVA_02659
MD02G1262400	3.90637	0.467185	0.669542	2.12718	61.9603	367.119	-2.5668	1.76e-05	0.0010632	DOWN	91.1586	412.126	-2.1766	2.64e-06	9.77e-05	DOWN	278.623	381.647	-0.45393	0.70694	0.96714	FALSE	sp|Q8LFN2|Y3037_ARATH	Probable inactive leucine-rich repeat receptor-like protein kinase At3g03770 OS=Arabidopsis thaliana GN=At3g03770 PE=2 SV=1	At3g03770
MD12G1238000	8.40239	1.64645	4.18736	4.04648	182.471	654.327	-1.8423	0.0019317	0.032344	DOWN	471.384	734.573	-0.64	0.21315	0.50373	FALSE	455.382	679.551	-0.5775	0.18281	0.5193	FALSE	sp|Q8H181|GTL2_ARATH	Trihelix transcription factor GTL2 OS=Arabidopsis thaliana GN=At5g28300 PE=2 SV=1	At5g28300
MD02G1263300	12.3526	2.59289	3.71193	4.26063	244.303	810	-1.7293	0.0020329	0.033417	DOWN	357.541	909.642	-1.3472	0.00021542	0.0035768	DOWN	404.643	842.196	-1.0575	0.013096	0.085734	FALSE	--	--	0
MD02G1264100	244.327	89.5553	101.28	44.0117	8842.65	16755	-0.92204	0.11238	0.40046	FALSE	10302.3	18812.2	-0.8687	0.011867	0.074088	FALSE	4260.93	17437.2	-2.0329	2.09e-06	6.21e-05	DOWN	sp|P28475|S6PD_MALDO	NADP-dependent D-sorbitol-6-phosphate dehydrogenase OS=Malus domestica GN=S6PDH PE=2 SV=1	S6PDH
MD02G1264600	20.2743	7.65616	9.58548	5.14726	634.949	1191.44	-0.90799	0.12123	0.416	FALSE	841.015	1337.71	-0.66957	0.056461	0.21685	FALSE	432.372	1239.48	-1.5194	0.00046123	0.0060497	DOWN	sp|P28475|S6PD_MALDO	NADP-dependent D-sorbitol-6-phosphate dehydrogenase OS=Malus domestica GN=S6PDH PE=2 SV=1	S6PDH
MD02G1264800	3.54677	1.17307	1.28311	0.978038	184.43	346.931	-0.91157	0.076579	0.3258	FALSE	186.87	389.565	-1.0598	0.0051341	0.040416	DOWN	137.178	360.635	-1.3945	0.0028015	0.025972	DOWN	sp|Q40392|TMVRN_NICGU	TMV resistance protein N OS=Nicotiana glutinosa GN=N PE=1 SV=1	N
MD02G1266900	11.0927	12.9127	45.4031	107.096	1362.57	785.004	0.79556	0.22254	0.56616	FALSE	4973.49	882.221	2.495	0.0088806	0.059656	FALSE	11087.6	818.84	3.7592	3.74e-18	1.62e-15	UP	sp|Q94BZ1|ZIFL1_ARATH	Protein ZINC INDUCED FACILITATOR-LIKE 1 OS=Arabidopsis thaliana GN=ZIFL1 PE=2 SV=1	ZIFL1
MD02G1267000	3.74926	3.471	6.41615	6.10472	335.229	244.146	0.4574	0.33783	0.69258	FALSE	639.187	274.205	1.221	0.0011419	0.013145	UP	574.47	254.248	1.176	0.0042871	0.036286	UP	sp|Q94BZ1|ZIFL1_ARATH	Protein ZINC INDUCED FACILITATOR-LIKE 1 OS=Arabidopsis thaliana GN=ZIFL1 PE=2 SV=1	ZIFL1
MD02G1267400	9.30028	1.90928	2.14685	2.38231	146.024	535.203	-1.8739	0.0019674	0.03271	DOWN	176.539	601.068	-1.7675	5.99e-06	0.00018938	DOWN	189.55	557.511	-1.5564	0.0088444	0.063739	FALSE	sp|Q9FPT1|UBP12_ARATH	Ubiquitin carboxyl-terminal hydrolase 12 OS=Arabidopsis thaliana GN=UBP12 PE=2 SV=2	UBP12
MD02G1268800	1.34102	3.06644	2.97881	2.69678	116.292	31.3776	1.8899	0.019311	0.14586	FALSE	106.649	35.2172	1.5985	0.001753	0.018269	UP	92.2612	32.5806	1.5017	0.0094619	0.066945	FALSE	--	--	0
MD02G1268900	3.76976	0.712462	0.797618	0.322876	93.1231	363.006	-1.9628	0.0014391	0.026581	DOWN	115.262	407.529	-1.822	0.00090053	0.010889	DOWN	44.0097	377.521	-3.1007	6.34e-10	5.13e-08	DOWN	sp|Q9LNU1|CRSP_ARATH	CO(2)-response secreted protease OS=Arabidopsis thaliana GN=CRSP PE=2 SV=1	CRSP
MD02G1271700	78.4926	18.5945	27.2907	42.8695	1255.33	3744.58	-1.5767	0.0047856	0.059438	FALSE	1911.2	4205.33	-1.1377	0.00099185	0.011746	DOWN	2946.18	3895.05	-0.40279	0.3696	0.74943	FALSE	sp|P93447|EF1D_PIMBR	Elongation factor 1-delta OS=Pimpinella brachycarpa PE=2 SV=3	2
MD06G1127800	28.5374	81.0959	54.5857	30.1142	16378.9	3475.87	2.2364	0.019891	0.14842	FALSE	10051	3903.04	1.3647	3.86e-05	0.00088181	UP	5370.95	3617.33	0.57025	0.16394	0.48802	FALSE	sp|Q9C882|GTL1_ARATH	Trihelix transcription factor GTL1 OS=Arabidopsis thaliana GN=GTL1 PE=1 SV=2	GTL1
MD02G1273500	3.34599	4.98329	7.75309	9.06743	620.894	261.798	1.2459	0.025929	0.17398	FALSE	900.358	294.03	1.6145	0.00020573	0.0034411	UP	1026.52	272.312	1.9144	4.17e-06	0.00011268	UP	sp|P93604|LRK10_WHEAT	Rust resistance kinase Lr10 OS=Triticum aestivum GN=LRK10 PE=2 SV=1	LRK10
MD02G1274000	0.00653705	0.140392	0.300759	1.07659	17.4256	0.499849	5.1236	0.012464	0.11084	FALSE	37.0909	0.562054	6.0442	0.052968	0.2082	FALSE	123.654	0.523202	7.8847	2.19e-10	1.97e-08	UP	sp|P93604|LRK10_WHEAT	Rust resistance kinase Lr10 OS=Triticum aestivum GN=LRK10 PE=2 SV=1	LRK10
MD02G1275900	3.93519	0.896216	0.500831	0.660067	50.6953	135.057	-1.4136	0.037899	0.21977	FALSE	25.0052	151.761	-2.6015	0.0021237	0.020935	DOWN	34.6543	141.128	-2.0259	0.0078889	0.058399	FALSE	sp|Q9SX25|CXE6_ARATH	Probable carboxylesterase 6 OS=Arabidopsis thaliana GN=CXE6 PE=2 SV=1	CXE6
MD02G1276400	3.79854	0.674343	1.38787	1.72097	38.0827	145.271	-1.9315	0.0032064	0.045366	DOWN	76.7558	163.15	-1.0879	0.017083	0.095718	FALSE	94.0839	151.304	-0.68543	0.21199	0.56376	FALSE	--	--	0
MD02G1277000	4.52617	1.0756	1.04432	0.428639	77.6751	216.849	-1.4812	0.01315	0.11461	FALSE	72.7584	243.489	-1.7427	6.96e-05	0.001432	DOWN	28.5352	225.458	-2.982	5.59e-08	2.56e-06	DOWN	sp|Q9LRR4|R13L1_ARATH	Putative disease resistance RPP13-like protein 1 OS=Arabidopsis thaliana GN=RPPL1 PE=3 SV=1	RPPL1
MD02G1277700	8.25679	2.81123	2.78955	2.26177	487.179	899.918	-0.88534	0.073863	0.32063	FALSE	455.598	1010.51	-1.1492	0.0012159	0.013825	DOWN	356.502	936.802	-1.3938	0.0011103	0.012345	DOWN	sp|B9SVG9|RBR_RICCO	Retinoblastoma-related protein OS=Ricinus communis GN=RBR PE=2 SV=1	RBR
MD14G1143600	20.3011	32.5155	32.6827	23.9545	6257.62	2420.71	1.3702	0.015994	0.12895	FALSE	5864.03	2718.26	1.1092	0.00086966	0.010598	UP	4186.54	2520.1	0.73228	0.073929	0.29399	FALSE	sp|Q9C882|GTL1_ARATH	Trihelix transcription factor GTL1 OS=Arabidopsis thaliana GN=GTL1 PE=1 SV=2	GTL1
MD02G1282100	28.0045	48.0157	39.2828	32.8441	7588.57	2739.2	1.4701	0.0092286	0.091209	FALSE	5833.11	3075.72	0.92334	0.0057533	0.043752	UP	4743.52	2848.78	0.73562	0.086677	0.32754	FALSE	sp|Q9FY48|KEG_ARATH	E3 ubiquitin-protein ligase KEG OS=Arabidopsis thaliana GN=KEG PE=1 SV=2	KEG
MD02G1282600	20.2379	13.6518	14.4675	5.51164	622.691	580.075	0.10228	0.94634	1	FALSE	621.059	651.433	-0.068886	0.99112	1	FALSE	232.255	604.631	-1.3803	0.0057538	0.045722	DOWN	sp|Q9ZP55|DRP4C_ARATH	Dynamin-related protein 4C OS=Arabidopsis thaliana GN=DRP4C PE=2 SV=1	DRP4C
MD02G1282700	12.5384	9.84767	10.3157	2.75383	628.002	506.675	0.30971	0.62381	0.90611	FALSE	620.474	568.935	0.12511	0.75539	0.96782	FALSE	161.793	527.91	-1.7061	0.005014	0.040935	DOWN	sp|Q9ZP55|DRP4C_ARATH	Dynamin-related protein 4C OS=Arabidopsis thaliana GN=DRP4C PE=2 SV=1	DRP4C
MD02G1282900	3.47362	2.24824	2.74928	0.809953	240.746	240.403	0.0020548	0.98372	1	FALSE	284.622	269.866	0.076805	0.81504	0.98998	FALSE	81.4379	250.047	-1.6184	0.0037118	0.032485	DOWN	sp|Q9ZP55|DRP4C_ARATH	Dynamin-related protein 4C OS=Arabidopsis thaliana GN=DRP4C PE=2 SV=1	DRP4C
MD02G1283700	10.1337	25.1535	16.7831	18.6399	1379.24	330.736	2.0601	0.076031	0.32496	FALSE	828.533	371.45	1.1574	0.001176	0.013458	UP	898.162	344.883	1.3809	0.0013778	0.014643	UP	sp|O22193|PUB4_ARATH	U-box domain-containing protein 4 OS=Arabidopsis thaliana GN=PUB4 PE=1 SV=3	PUB4
MD02G1283800	10.6178	4.1557	2.59823	9.07601	305.114	583.667	-0.9358	0.29708	0.65241	FALSE	210.996	655.539	-1.6355	0.00065681	0.0084978	DOWN	682.67	608.34	0.16631	0.72917	0.97626	FALSE	sp|O04496|AED3_ARATH	Aspartyl protease AED3 OS=Arabidopsis thaliana GN=AED3 PE=1 SV=1	AED3
MD05G1024500	0.44287	0.0952434	0.181442	0.0447545	10.445	30.8802	-1.5639	0.07823	0.32954	FALSE	18.5532	34.6722	-0.90211	0.19376	0.47636	FALSE	4.48604	32.0713	-2.8378	0.0028923	0.026682	DOWN	sp|Q39117|TGT2_ARATH	Trihelix transcription factor GT-2 OS=Arabidopsis thaliana GN=GT-2 PE=2 SV=1	GT-2
MD02G1284500	2.04909	9.59209	84.8173	244.651	437.07	57.9462	2.9151	0.19444	0.53091	FALSE	3868.42	65.1102	5.8927	0.050966	0.20276	FALSE	10623.6	60.2989	7.4609	1.35e-05	0.00031258	UP	sp|Q9LK88|NQR_ARATH	NADPH:quinone oxidoreductase OS=Arabidopsis thaliana GN=NQR PE=1 SV=1	NQR
MD02G1285800	5.92501	1.14367	1.99928	4.79286	110.522	377.452	-1.772	0.0027152	0.040749	DOWN	189.912	423.907	-1.1584	0.0020085	0.02014	DOWN	443.798	393.04	0.17523	0.65084	0.94004	FALSE	sp|Q94CK9|LRP1_ARATH	Protein LATERAL ROOT PRIMORDIUM 1 OS=Arabidopsis thaliana GN=LRP1 PE=1 SV=1	LRP1
MD02G1286900	5.67244	2.14952	2.15577	1.6016	331.216	569.059	-0.78081	0.15996	0.47948	FALSE	319.701	639.074	-0.99926	0.0078097	0.054473	FALSE	232.301	592.248	-1.3502	0.0021134	0.020729	DOWN	sp|Q9LRR4|R13L1_ARATH	Putative disease resistance RPP13-like protein 1 OS=Arabidopsis thaliana GN=RPPL1 PE=3 SV=1	RPPL1
MD02G1287600	6.84599	1.27973	2.31139	2.66986	389.79	1489.95	-1.9345	0.00071528	0.016186	DOWN	739.291	1673.19	-1.1784	0.00082168	0.010162	DOWN	833.528	1550.09	-0.89505	0.039444	0.1919	FALSE	sp|Q5D869|NRPE1_ARATH	DNA-directed RNA polymerase V subunit 1 OS=Arabidopsis thaliana GN=NRPE1 PE=1 SV=1	NRPE1
MD02G1287700	0	0.0113638	0.0115711	0	0.375871	0	Inf	0.94403	1	FALSE	0.371577	0	Inf	0.96342	1	FALSE	0	0	NA	NA	NA	NA	sp|Q9M1I2|PTR46_ARATH	Protein NRT1/ PTR FAMILY 5.4 OS=Arabidopsis thaliana GN=NPF5.4 PE=2 SV=1	NPF5.4
MD02G1291200	1.17538	0.248381	0.0791846	0.2048	17.0313	46.2956	-1.4427	0.035077	0.20983	FALSE	4.40949	51.9997	-3.5598	8.37e-06	0.00025005	DOWN	11.0183	48.2444	-2.1305	0.0096482	0.067952	FALSE	sp|Q9ZVJ6|ANXD4_ARATH	Annexin D4 OS=Arabidopsis thaliana GN=ANN4 PE=2 SV=1	ANN4
MD02G1291400	0.0734554	0.347874	1.52599	7.57032	33.633	4.54618	2.8871	0.23509	0.58156	FALSE	155.752	5.09689	4.9335	0.19198	0.47378	FALSE	726.084	4.69708	7.2722	0.0018825	0.018814	UP	sp|Q9S9K4|ASPL2_ARATH	Aspartic proteinase-like protein 2 OS=Arabidopsis thaliana GN=At1g65240 PE=1 SV=2	At1g65240
MD02G1292100	9.30085	18.8573	20.9773	20.4492	2214.95	697.16	1.6677	0.0018902	0.031939	UP	2395.63	782.938	1.6134	3.39e-06	0.00011855	UP	2260.14	725.552	1.6393	9.74e-05	0.0016749	UP	sp|Q944L7|SLP2_ARATH	Shewanella-like protein phosphatase 2 OS=Arabidopsis thaliana GN=SLP2 PE=1 SV=1	SLP2
MD02G1292200	0.361214	2.06941	3.03166	10.1901	111.043	11.524	3.2684	0.0053361	0.064095	FALSE	145.495	12.9509	3.4898	1.78e-07	9.77e-06	UP	471.994	12.0638	5.29	2.52e-11	2.81e-09	UP	--	--	0
MD02G1293500	5.29142	1.7566	1.90757	1.38883	88.9123	186.048	-1.0652	0.086778	0.34848	FALSE	100.045	208.931	-1.0624	0.010439	0.067254	FALSE	69.8524	193.509	-1.47	0.0040749	0.034919	DOWN	sp|O60306|AQR_HUMAN	Intron-binding protein aquarius OS=Homo sapiens GN=AQR PE=1 SV=4	AQR
MD02G1294000	6.50927	0.904156	1.92002	3.16732	35.0625	166.556	-2.248	0.00042851	0.011181	DOWN	71.6094	187.089	-1.3855	0.012754	0.078059	FALSE	120.032	173.784	-0.53388	0.22097	0.57708	FALSE	--	--	0
MD02G1295700	0.73971	0.0509681	0	0	1.22423	14.0432	-3.5199	0.029796	0.19004	FALSE	0	15.7578	#NAME?	0.0003874	0.0056487	DOWN	0	14.5622	#NAME?	0.0011618	0.012793	DOWN	sp|Q9C523|DIR19_ARATH	Dirigent protein 19 OS=Arabidopsis thaliana GN=DIR19 PE=2 SV=1	DIR19
MD02G1295800	13.4142	3.12682	3.38483	3.51001	306.599	914.652	-1.5769	0.006378	0.07178	FALSE	341.151	1026.84	-1.5897	0.00058352	0.007715	DOWN	345.199	949.875	-1.4603	0.00064371	0.007963	DOWN	sp|Q9LPR8|SCL3_ARATH	Scarecrow-like protein 3 OS=Arabidopsis thaliana GN=SCL3 PE=2 SV=1	SCL3
MD02G1296000	10.1178	20.8982	15.4119	9.36007	2536.55	784.021	1.6939	0.00219	0.035265	UP	1803.19	880.2	1.0347	0.10463	0.32442	FALSE	1064.13	815.455	0.38399	0.61989	0.92704	FALSE	sp|Q9FMY1|C86B1_ARATH	Cytochrome P450 86B1 OS=Arabidopsis thaliana GN=CYP86B1 PE=2 SV=1	CYP86B1
MD02G1296500	0.106454	0.451002	0.10395	0.784017	37.1592	4.71611	2.978	0.37763	0.7312	FALSE	7.37744	5.29898	0.47741	0.83796	0.9965	FALSE	52.5638	4.92536	3.4158	0.0010045	0.011423	UP	sp|O48716|JGB_ARATH	Protein JINGUBANG OS=Arabidopsis thaliana GN=JGB PE=1 SV=1	JGB
MD02G1297300	3.26449	0.626129	0.676929	0.496966	74.7299	259.675	-1.7969	0.0021417	0.034679	DOWN	80.3502	291.682	-1.86	9.06e-06	0.00026751	DOWN	57.2027	270.77	-2.2429	5.46e-06	0.00014295	DOWN	sp|Q8LPG9|IQD14_ARATH	Protein IQ-DOMAIN 14 OS=Arabidopsis thaliana GN=IQD14 PE=1 SV=1	IQD14
MD02G1298600	2.95323	4.25765	1.87612	0.355447	249.049	100.991	1.3022	0.37768	0.73122	FALSE	94.7867	113.435	-0.25911	0.78289	0.97734	FALSE	17.7156	105.373	-2.5724	0.00014917	0.0023786	DOWN	--	--	0
MD02G1299000	6.85228	0.372157	1.52425	2.35866	34.7012	459.18	-3.726	2.59e-09	1.25e-06	DOWN	142.561	515.709	-1.855	7.88e-05	0.0015814	DOWN	224.915	478.081	-1.0879	0.020675	0.12026	FALSE	sp|Q9FFZ1|PPH_ARATH	Pheophytinase, chloroplastic OS=Arabidopsis thaliana GN=PPH PE=1 SV=1	PPH
MD02G1300200	28.8741	6.32522	6.38254	8.42075	198.476	640.253	-1.6897	0.0032284	0.045477	DOWN	207.718	719.076	-1.7915	1.3e-05	0.00036151	DOWN	276.48	665.729	-1.2678	0.0019062	0.019001	DOWN	--	--	0
MD02G1300300	14.567	40.5359	32.5703	23.3341	5811.23	1347.05	2.109	0.00013995	0.004947	UP	4589.43	1512.22	1.6017	0.0017028	0.017873	UP	3184.11	1400.93	1.1845	0.053984	0.23831	FALSE	sp|Q869R1|CTLHB_DICDI	CTL-like protein DDB_G0274487 OS=Dictyostelium discoideum GN=DDB_G0274487 PE=3 SV=1	DDB_G0274487
MD10G1025100	38.9832	83.738	62.7679	27.4924	10566.9	3025.25	1.8044	0.0047558	0.0592	FALSE	7390.89	3396.48	1.1217	0.001269	0.014281	UP	3103.82	3144.83	-0.018937	0.96687	1	FALSE	sp|Q39117|TGT2_ARATH	Trihelix transcription factor GT-2 OS=Arabidopsis thaliana GN=GT-2 PE=2 SV=1	GT-2
MD02G1301600	17.6123	28.0266	32.7551	17.4476	1633.92	678.866	1.2671	0.015166	0.12512	FALSE	1913.23	762.295	1.3276	0.00010445	0.001998	UP	982.194	706.151	0.47603	0.25226	0.61779	FALSE	sp|O02494|IF4A_CRYPV	Eukaryotic initiation factor 4A OS=Cryptosporidium parvum GN=EIF4-A PE=2 SV=1	EIF4-A
MD02G1301700	12.3434	24.2371	24.1382	11.8475	1455.49	465.538	1.6445	0.003356	0.046793	UP	1388.19	522.742	1.409	0.00058471	0.0077257	UP	643.424	483.993	0.41078	0.39795	0.77658	FALSE	sp|Q7G188|FIMB1_ARATH	Fimbrin-1 OS=Arabidopsis thaliana GN=FIM1 PE=1 SV=2	FIM1
MD02G1301800	9.80773	20.4275	17.1628	12.5278	3642.28	1046.77	1.7989	0.062946	0.29191	FALSE	2768.66	1175.39	1.2361	0.00026691	0.0042085	UP	1976.54	1088.57	0.86055	0.046748	0.21633	FALSE	sp|O02494|IF4A_CRYPV	Eukaryotic initiation factor 4A OS=Cryptosporidium parvum GN=EIF4-A PE=2 SV=1	EIF4-A
MD02G1301900	53.1883	8.41585	13.1733	17.4113	632.761	2680.39	-2.0827	0.00022273	0.0069241	DOWN	983.4	3009.69	-1.6138	2.6e-06	9.64e-05	DOWN	1286.26	2785.23	-1.1146	0.0048116	0.039654	DOWN	sp|Q94CJ5|RER4_ARATH	Protein RETICULATA-RELATED 4, chloroplastic OS=Arabidopsis thaliana GN=RER4 PE=2 SV=1	RER4
MD02G1302500	2.64693	6.55672	6.46953	5.16181	196.677	50.1347	1.9719	0.0017311	0.030254	UP	184.984	56.2933	1.7164	0.00010496	0.0020067	UP	141.248	52.2057	1.4359	0.016816	0.10337	FALSE	--	--	0
MD02G1303400	4.17233	2.09184	3.78355	10.4189	134.243	177.813	-0.40551	0.75985	0.97592	FALSE	246.828	199.859	0.30453	0.58933	0.8693	FALSE	659.971	185.901	1.8279	0.002443	0.023172	UP	sp|Q9S9N9|CCR1_ARATH	Cinnamoyl-CoA reductase 1 OS=Arabidopsis thaliana GN=CCR1 PE=1 SV=1	CCR1
MD05G1041400	6.68904	7.52789	10.4424	9.02586	1542.6	903.147	0.77233	0.12066	0.41503	FALSE	2145.42	1014.04	1.0812	0.0032436	0.028868	UP	1798.79	939.233	0.93747	0.044183	0.20766	FALSE	sp|Q8GZA6|PP113_ARATH	Pentatricopeptide repeat-containing protein At1g71210 OS=Arabidopsis thaliana GN=At1g71210 PE=2 SV=1	At1g71210
MD02G1306700	3.01382	0.417165	0.806202	1.16127	75.0386	354.078	-2.2384	0.00021396	0.0067544	DOWN	140.132	397.746	-1.5051	0.00014407	0.0026026	DOWN	197.931	368.571	-0.89694	0.046895	0.21663	FALSE	sp|Q40392|TMVRN_NICGU	TMV resistance protein N OS=Nicotiana glutinosa GN=N PE=1 SV=1	N
MD02G1307700	2.20706	0.177644	0.630349	2.0935	18.4514	139.273	-2.9161	0.0012001	0.023335	DOWN	55.7729	156.519	-1.4887	0.1243	0.36177	FALSE	184.511	145.236	0.34531	0.62432	0.92754	FALSE	--	--	0
MD16G1109700	18.5258	34.962	29.4417	19.472	3005.07	1008.07	1.5758	0.0038815	0.051968	FALSE	2421.68	1131.95	1.0972	0.0012949	0.014479	UP	1563.94	1048.75	0.57652	0.19245	0.53374	FALSE	sp|Q9FX53|TGT1_ARATH	Trihelix transcription factor GT-1 OS=Arabidopsis thaliana GN=GT-1 PE=1 SV=1	GT-1
MD02G1308600	1.63548	0.367164	0.38059	0.609878	29.1082	77.0888	-1.4051	0.024908	0.16969	FALSE	25.8403	86.5218	-1.7434	0.005723	0.043564	DOWN	41.2683	80.0397	-0.95568	0.10955	0.3818	FALSE	sp|Q9SFB3|ATAB2_ARATH	Protein TAB2 homolog, chloroplastic OS=Arabidopsis thaliana GN=ATAB2 PE=2 SV=1	ATAB2
MD02G1308800	0.00628171	0.0146363	0.0244085	0.185266	1.87935	0.514192	1.8699	0.61559	0.90114	FALSE	3.15965	0.578162	2.4502	0.47603	0.78417	FALSE	21.807	0.54176	5.331	7.3e-05	0.0013078	UP	sp|Q8L709|CHX28_ARATH	Cation/H(+) antiporter 28 OS=Arabidopsis thaliana GN=CHX28 PE=2 SV=2	CHX28
MD02G1309600	4.29031	10.4952	7.58898	7.61415	256.595	62.6883	2.0332	0.035065	0.20979	FALSE	169.438	70.4091	1.2669	0.0066102	0.048331	UP	161.711	65.36	1.3069	0.0074261	0.055705	FALSE	sp|Q94IR2|CCD1_PHAVU	Carotenoid 9,10(9&apos;,10&apos;)-cleavage dioxygenase 1 OS=Phaseolus vulgaris GN=CCD1 PE=1 SV=1	CCD1
MD02G1309700	3.59316	10.6398	6.90061	10.6059	1143.64	228.264	2.3249	0.043853	0.23916	FALSE	672.906	256.492	1.3915	0.013298	0.080233	FALSE	1004.61	238.133	2.0768	3.95e-05	0.0007783	UP	sp|Q94IR2|CCD1_PHAVU	Carotenoid 9,10(9&apos;,10&apos;)-cleavage dioxygenase 1 OS=Phaseolus vulgaris GN=CCD1 PE=1 SV=1	CCD1
MD17G1017400	18.0091	26.1655	26.8797	16.5975	2330.82	1056.19	1.142	0.031823	0.19763	FALSE	2374.32	1185.88	1.0016	0.0027212	0.025269	UP	1418.08	1098.58	0.3683	0.43919	0.81345	FALSE	sp|Q9FX53|TGT1_ARATH	Trihelix transcription factor GT-1 OS=Arabidopsis thaliana GN=GT-1 PE=1 SV=1	GT-1
MD02G1311200	5.62278	17.3921	14.26	7.51373	1135.62	230.937	2.2979	4.73e-05	0.0022154	UP	895.275	259.224	1.7881	0.0040051	0.033758	UP	445.684	239.9	0.89359	0.28642	0.66243	FALSE	sp|Q9C9C5|RL63_ARATH	60S ribosomal protein L6-3 OS=Arabidopsis thaliana GN=RPL6C PE=2 SV=1	RPL6C
MD02G1311700	0	0.0560679	0.2674	1.11447	1.15982	0	Inf	0.6081	0.89752	FALSE	5.97989	0	Inf	0.040114	0.17275	FALSE	23.9097	0	Inf	3.02e-06	8.55e-05	UP	sp|Q8RX29|ATL70_ARATH	RING-H2 finger protein ATL70 OS=Arabidopsis thaliana GN=ATL70 PE=2 SV=1	ATL70
MD02G1312000	0.7152	0.172048	0.0671988	0.0295803	10.7799	32.4564	-1.5902	0.085009	0.3449	FALSE	4.49431	36.4204	-3.0186	0.0024587	0.023372	DOWN	1.82439	33.66	-4.2056	0.00042589	0.0056878	DOWN	--	--	0
MD13G1130000	38.9278	13.2885	9.56924	9.46488	1091.22	2029.4	-0.89511	0.074387	0.32176	FALSE	744.71	2277.85	-1.6129	0.0014824	0.016066	DOWN	725.18	2107.81	-1.5393	0.0013132	0.014113	DOWN	sp|Q8VZ20|ASR3_ARATH	Trihelix transcription factor ASR3 OS=Arabidopsis thaliana GN=ASR3 PE=1 SV=1	ASR3
MD02G1313200	0.448713	0.755828	1.18685	1.48809	37.0927	14.4651	1.3586	0.10349	0.38261	FALSE	58.0964	16.2493	1.8381	0.00351	0.030624	UP	70.5656	15.0594	2.2283	0.00065802	0.0081225	UP	sp|P25083|ADT1_SOLTU	ADP,ATP carrier protein, mitochondrial OS=Solanum tuberosum GN=ANT PE=2 SV=1	ANT
MD02G1314500	190.882	470.53	525.604	494.576	20242.7	5197.71	1.9615	0.00036051	0.0099342	UP	21716.6	5837.09	1.8955	2.23e-08	1.63e-06	UP	19965.8	5409.28	1.884	0.0047208	0.039086	UP	sp|A3BDI8|SAP8_ORYSJ	Zinc finger A20 and AN1 domain-containing stress-associated protein 8 OS=Oryza sativa subsp. japonica GN=SAP8 PE=2 SV=1	SAP8
MD02G1315200	11.9099	2.1789	3.03658	1.47471	153.339	516.292	-1.7515	0.0011696	0.022917	DOWN	190.301	579.842	-1.6074	0.0048037	0.038522	DOWN	87.724	538.386	-2.6176	0.00034106	0.0047333	DOWN	sp|Q00874|DR100_ARATH	DNA damage-repair/toleration protein DRT100 OS=Arabidopsis thaliana GN=DRT100 PE=2 SV=2	DRT100
MD16G1130200	36.3072	70.3483	53.9888	38.4978	6352.98	2052.08	1.6303	0.0033177	0.046401	UP	4619.73	2304.37	1.0034	0.0026828	0.025025	UP	3217.7	2135.58	0.5914	0.17972	0.51516	FALSE	sp|Q8VZ20|ASR3_ARATH	Trihelix transcription factor ASR3 OS=Arabidopsis thaliana GN=ASR3 PE=1 SV=1	ASR3
MD07G1048900	8.66113	2.08824	3.41851	2.26207	180.832	511.688	-1.5006	0.0099173	0.095846	FALSE	301.6	574.532	-0.92975	0.01219	0.075678	FALSE	187.741	532.201	-1.5032	0.0014855	0.015558	DOWN	sp|Q9LJG8|ASIL2_ARATH	Trihelix transcription factor ASIL2 OS=Arabidopsis thaliana GN=ASIL2 PE=2 SV=1	ASIL2
MD02G1315900	22.9301	5.46611	7.55393	7.98585	844.487	2377.25	-1.4931	0.0056221	0.066287	FALSE	1149.12	2669.46	-1.216	0.00046842	0.00653	DOWN	1187.5	2471.25	-1.0573	0.01307	0.085647	FALSE	sp|F4KF14|FTSI4_ARATH	Probable inactive ATP-dependent zinc metalloprotease FTSHI 4, chloroplastic OS=Arabidopsis thaliana GN=FTSHI4 PE=1 SV=1	FTSHI4
MD02G1316500	35.7902	8.42064	10.8563	14.9229	806.491	2279.16	-1.4988	0.0053266	0.064075	FALSE	1023.03	2559.63	-1.3231	0.00011483	0.0021576	DOWN	1378.69	2370.71	-0.78202	0.057773	0.24949	FALSE	sp|Q8GWW8|GFA2_ARATH	Chaperone protein dnaJ GFA2, mitochondrial OS=Arabidopsis thaliana GN=GFA2 PE=2 SV=1	GFA2
MD02G1317800	62.6793	2.55772	1.45491	0.643929	458.332	6766.87	-3.884	5.82e-06	0.00046931	DOWN	230.221	7597.57	-5.0444	1.41e-07	7.98e-06	DOWN	98.9722	7020.79	-6.1485	2.27e-09	1.56e-07	DOWN	sp|O24370|LOX21_SOLTU	Linoleate 13S-lipoxygenase 2-1, chloroplastic OS=Solanum tuberosum GN=LOX2.1 PE=1 SV=1	LOX2.1
MD02G1318100	0.0989571	0.0106841	0.219042	0.870876	1.19202	8.17543	-2.7779	0.17784	0.50678	FALSE	24.6847	9.18477	1.4263	0.41689	0.73456	FALSE	103.166	8.53345	3.5957	0.0047811	0.039473	UP	sp|Q0JEU6|LERK3_ORYSJ	G-type lectin S-receptor-like serine/threonine-protein kinase LECRK3 OS=Oryza sativa subsp. japonica GN=LECRK3 PE=3 SV=2	LECRK3
MD02G1318600	3.16234	12.8836	3.69837	5.61629	1115.23	153.054	2.8652	0.21554	0.55672	FALSE	276.292	171.908	0.68455	0.20483	0.49202	FALSE	403.411	159.278	1.3407	0.0038342	0.033364	UP	--	--	0
MD02G1319300	41.3116	69.3539	67.5536	84.9561	7179.33	2703.17	1.4092	0.0069586	0.075849	FALSE	6859.85	3036.24	1.1759	0.06397	0.23538	FALSE	8275.15	2814	1.5562	0.00024719	0.0036538	UP	sp|P49298|CISY_CITMA	Citrate synthase, mitochondrial OS=Citrus maxima GN=CIT PE=2 SV=1	CIT
MD02G1319400	11.1558	33.9024	29.0662	25.7756	3466.4	712.318	2.2828	3.91e-05	0.0019239	UP	2855.11	800.032	1.8354	9.46e-05	0.0018406	UP	2440.84	741.744	1.7184	5.39e-05	0.0010079	UP	sp|Q39055|CNX2_ARATH	GTP 3&apos;,8-cyclase, mitochondrial OS=Arabidopsis thaliana GN=CNX2 PE=1 SV=1	CNX2
MD02G1319500	1.93581	22.6378	36.5878	80.6619	412.5	21.2553	4.2785	0.0008964	0.018998	UP	655.017	23.8854	4.7773	0.10979	0.33486	FALSE	1367.98	22.178	5.9468	0.00060147	0.0075197	UP	--	--	0
MD02G1320700	1.8162	0.455871	0.445839	0.194242	124.909	321.637	-1.3646	0.016943	0.13382	FALSE	115.871	361.19	-1.6402	6.28e-05	0.0013175	DOWN	49.7391	335.064	-2.752	2.14e-08	1.1e-06	DOWN	sp|F4IRU3|MYO12_ARATH	Myosin-12 OS=Arabidopsis thaliana GN=XI-F PE=2 SV=1	XI-F
MD10G1279600	37.7267	176.761	73.9484	68.135	8436.48	1059.06	2.9939	0.026095	0.17472	FALSE	3192.82	1189.5	1.4245	0.00082642	0.010205	UP	2844.74	1102.97	1.3669	0.0041955	0.035707	UP	sp|Q9LJG8|ASIL2_ARATH	Trihelix transcription factor ASIL2 OS=Arabidopsis thaliana GN=ASIL2 PE=2 SV=1	ASIL2
MD03G1002200	1.57741	2.16373	5.22727	2.38284	169.561	85.6296	0.98562	0.085189	0.34536	FALSE	426.34	96.1691	2.1484	4.62e-08	3.05e-06	UP	187.016	89.085	1.0699	0.020766	0.12065	FALSE	sp|Q9SAV3|ODBB1_ARATH	2-oxoisovalerate dehydrogenase subunit beta 1, mitochondrial OS=Arabidopsis thaliana GN=BCDH BETA1 PE=2 SV=1	BCDH
MD03G1002400	5.7758	2.59784	2.14668	4.51563	354.811	499.873	-0.49451	0.28435	0.63963	FALSE	278.335	561.352	-1.0121	0.005693	0.043432	DOWN	581.664	519.71	0.16248	0.84611	1	FALSE	sp|Q91YT7|YTHD2_MOUSE	YTH domain-containing family protein 2 OS=Mus musculus GN=Ythdf2 PE=1 SV=1	Ythdf2
MD03G1002800	41.2522	26.4696	20.6373	11.8419	706.787	689.094	0.036576	0.90055	1	FALSE	516.801	773.705	-0.58218	0.096667	0.30861	FALSE	285.561	716.101	-1.3264	0.0022072	0.021399	DOWN	sp|Q9LJE4|CPNB2_ARATH	Chaperonin 60 subunit beta 2, chloroplastic OS=Arabidopsis thaliana GN=CPN60B2 PE=1 SV=1	CPN60B2
MD03G1003200	1.08407	0.0853205	0.20854	0.241298	4.69092	38.6935	-3.0441	0.001353	0.025469	DOWN	12.2843	43.4469	-1.8224	0.0032203	0.028717	DOWN	12.5133	40.1957	-1.6836	0.028302	0.1512	FALSE	--	--	0
MD03G1003500	118.571	15.9523	21.6974	48.7583	1697.56	8183.75	-2.2693	2.71e-05	0.001479	DOWN	2225.8	9190.67	-2.0458	2.15e-09	2.14e-07	DOWN	4848.65	8517.57	-0.81286	0.053267	0.23618	FALSE	--	--	0
MD03G1003700	7.63033	0.5692	2.13789	2.4288	32.7926	323	-3.3001	2.32e-07	4.16e-05	DOWN	127.623	362.735	-1.507	0.00072837	0.0092434	DOWN	145.67	336.094	-1.2062	0.013531	0.087917	FALSE	--	--	0
MD17G1195600	36.8215	55.5958	53.4126	40.1776	5352.55	2262.45	1.2423	0.020821	0.15278	FALSE	4958.02	2540.73	0.96452	0.0034021	0.029951	UP	3620.95	2355.37	0.62041	0.13281	0.43024	FALSE	sp|Q9SYG2|ASIL1_ARATH	Trihelix transcription factor ASIL1 OS=Arabidopsis thaliana GN=ASIL1 PE=1 SV=1	ASIL1
MD03G1005000	1.97748	0.217657	0.167597	0.610241	3.98067	19.059	-2.2594	0.030444	0.19254	FALSE	2.40626	21.4028	-3.1529	0.0045085	0.036703	DOWN	8.3566	19.8204	-1.246	0.23917	0.60155	FALSE	--	--	0
MD03G1005900	9.95109	0.545606	1.34796	1.33839	49.7161	673.354	-3.7596	1.21e-09	6.77e-07	DOWN	128.066	756.291	-2.5621	8.01e-11	1.19e-08	DOWN	126.167	701.454	-2.475	1.57e-07	6.38e-06	DOWN	sp|Q94CD8|E134_ARATH	Glucan endo-1,3-beta-glucosidase 4 OS=Arabidopsis thaliana GN=At3g13560 PE=1 SV=1	At3g13560
MD03G1006200	0.565345	0.0876645	0.209614	0.273249	24.3867	114.544	-2.2317	0.0018569	0.031705	DOWN	61.4155	128.636	-1.0666	0.028243	0.13649	FALSE	76.9485	119.297	-0.63259	0.52877	0.87661	FALSE	sp|Q9LRR4|R13L1_ARATH	Putative disease resistance RPP13-like protein 1 OS=Arabidopsis thaliana GN=RPPL1 PE=3 SV=1	RPPL1
MD01G1051900	0.473232	1.80647	4.21657	1.99574	128.347	23.6655	2.4392	0.0094348	0.092565	FALSE	319.064	26.6012	3.5843	0.0005455	0.0073457	UP	141.611	24.8069	2.5131	4.85e-05	0.00092198	UP	sp|B6VJS4|ROMT_VITVI	Trans-resveratrol di-O-methyltransferase OS=Vitis vinifera GN=ROMT PE=1 SV=2	ROMT
MD03G1007500	9.5349	3.1893	3.63228	3.82882	263.833	537.182	-1.0258	0.084065	0.34279	FALSE	303.128	603.273	-0.99288	0.0067904	0.049242	DOWN	316.243	558.88	-0.8215	0.047348	0.21798	FALSE	sp|Q93W93|FBK22_ARATH	F-box/kelch-repeat protein At1g55270 OS=Arabidopsis thaliana GN=At1g55270 PE=2 SV=1	At1g55270
MD05G1308800	11.0722	1.36293	2.02122	2.07131	97.7462	535.729	-2.4544	2.92e-05	0.0015595	DOWN	144.622	601.729	-2.0568	5.09e-08	3.3e-06	DOWN	143.287	557.376	-1.9597	1.85e-05	0.00040991	DOWN	sp|B6VJS4|ROMT_VITVI	Trans-resveratrol di-O-methyltransferase OS=Vitis vinifera GN=ROMT PE=1 SV=2	ROMT
MD06G1010300	35.9312	735.784	340.859	151.454	43743.3	1307.65	5.064	5e-09	2.04e-06	UP	19067.3	1469.61	3.6976	6.31e-08	4e-06	UP	8058.08	1365.26	2.5613	0.0048171	0.039682	UP	sp|P54797|TNG2_MOUSE	Transport and Golgi organization 2 homolog OS=Mus musculus GN=Tango2 PE=1 SV=1	Tango2
MD03G1010400	20.9901	237.595	89.9339	189.44	13575.6	677.366	4.3249	0.044567	0.24176	FALSE	4666.25	760.977	2.6163	0.13825	0.38735	FALSE	9328.24	706.407	3.723	0.0019937	0.019725	UP	--	--	0
MD03G1010700	17.7188	1.78499	2.57049	1.19166	53.8681	350.255	-2.7009	4.84e-06	0.00040746	DOWN	70.8953	393.256	-2.4717	4.89e-09	4.45e-07	DOWN	32.7332	364.097	-3.4755	2.62e-11	2.91e-09	DOWN	sp|Q9C891|DIR20_ARATH	Dirigent protein 20 OS=Arabidopsis thaliana GN=DIR20 PE=2 SV=1	DIR20
MD03G1010800	71.4313	7.46144	5.55072	10.0306	152.092	889.338	-2.5478	3.61e-06	0.00033038	DOWN	101.34	998.509	-3.3006	3.87e-08	2.61e-06	DOWN	191.018	925.941	-2.2772	2.01e-05	0.00043824	DOWN	--	--	0
MD03G1011600	7.9151	16.9616	14.4126	6.7627	575.071	167.555	1.7791	0.0027178	0.040751	UP	458.238	188.128	1.2844	0.00051433	0.0070117	UP	207.947	174.27	0.25489	0.62493	0.92754	FALSE	sp|O64750|EDA3_ARATH	Protein EMBRYO SAC DEVELOPMENT ARREST 3, chloroplastic OS=Arabidopsis thaliana GN=EDA3 PE=1 SV=1	EDA3
MD03G1011700	2.25915	0.486228	0.422965	0.536938	53.356	151.029	-1.5011	0.0086	0.086864	FALSE	40.5583	169.657	-2.0646	1.58e-05	0.0004224	DOWN	54.3084	157.42	-1.5354	0.0012471	0.013522	DOWN	sp|Q10PP8|MTP4_ORYSJ	Metal tolerance protein 4 OS=Oryza sativa subsp. japonica GN=MTP4 PE=2 SV=1	MTP4
MD03G1011900	0.249342	16.5349	6.90318	19.5587	200.244	1.71361	6.8686	0.0016069	0.028639	UP	76.6247	1.92692	5.3134	0.01467	0.08608	FALSE	209.89	1.78481	6.8777	0.00084098	0.0098942	UP	--	--	0
MD03G1012000	4.54562	26.635	10.7404	15.1417	2427.84	236.294	3.361	0.10124	0.3775	FALSE	862.629	265.448	1.7003	0.0046177	0.037366	UP	1170.98	246.491	2.2481	5.95e-06	0.00015418	UP	sp|Q9M2P4|SINA2_ARATH	E3 ubiquitin-protein ligase SINAT2 OS=Arabidopsis thaliana GN=SINAT2 PE=1 SV=1	SINAT2
MD03G1012400	23.5425	4.61578	11.3848	17.2722	537.95	1907.3	-1.826	0.0015288	0.027664	DOWN	1352.97	2142.34	-0.66306	0.10413	0.32311	FALSE	2022.07	1987.81	0.024652	0.88052	1	FALSE	sp|P28723|FTHS_SPIOL	Formate--tetrahydrofolate ligase OS=Spinacia oleracea PE=1 SV=3	1
MD03G1012800	1.53558	0.117247	0.212852	0.364284	5.74484	54.3643	-3.2423	0.00036761	0.010082	DOWN	11.3517	61.0636	-2.4274	0.00017646	0.003053	DOWN	17.6149	56.639	-1.685	0.029465	0.15541	FALSE	sp|Q9LEH3|PER15_IPOBA	Peroxidase 15 OS=Ipomoea batatas GN=pod PE=1 SV=1	pod
MD11G1100400	3.03693	0.326069	0.332332	0.527572	67.846	402.468	-2.5685	1.1e-05	0.00074809	DOWN	64.2884	452.02	-2.8138	1.52e-06	6.15e-05	DOWN	100.887	418.35	-2.052	0.00012017	0.0019975	DOWN	sp|C0LGT6|EFR_ARATH	LRR receptor-like serine/threonine-protein kinase EFR OS=Arabidopsis thaliana GN=EFR PE=1 SV=1	EFR
MD03G1014100	0	0.0453592	0.0413617	0	0.408076	0	Inf	0.94405	1	FALSE	0.491781	0	Inf	0.96344	1	FALSE	0	0	NA	NA	NA	NA	--	--	0
MD03G1014200	0	0.312736	3.34332	3.22447	16.1946	0	Inf	0.10948	0.3952	FALSE	183.94	0	Inf	0.02559	0.12727	FALSE	162.363	0	Inf	1.54e-07	6.26e-06	UP	sp|Q9LEH3|PER15_IPOBA	Peroxidase 15 OS=Ipomoea batatas GN=pod PE=1 SV=1	pod
MD03G1015000	69.7334	42.3532	41.0897	22.9216	14366	15502.6	-0.10985	0.80356	0.99396	FALSE	13672.6	17407.3	-0.3484	0.37833	0.69905	FALSE	7312.14	16138.7	-1.1422	0.0063563	0.049486	DOWN	sp|Q9LXT9|CALS3_ARATH	Callose synthase 3 OS=Arabidopsis thaliana GN=CALS3 PE=2 SV=3	CALS3
MD03G1015300	1.01979	1.07628	1.01311	0.244321	204.92	130.454	0.65153	0.25389	0.60507	FALSE	195.207	146.508	0.41402	0.27683	0.58659	FALSE	43.7773	135.916	-1.6345	0.0045778	0.038232	DOWN	sp|Q9LRR4|R13L1_ARATH	Putative disease resistance RPP13-like protein 1 OS=Arabidopsis thaliana GN=RPPL1 PE=3 SV=1	RPPL1
MD03G1016800	14.1983	1.1955	2.72225	3.43149	94.6936	857.922	-3.1795	1.31e-07	2.65e-05	DOWN	237.732	963.351	-2.0187	5.51e-08	3.53e-06	DOWN	286.276	891.961	-1.6396	0.0034092	0.030419	DOWN	sp|Q9SLA8|FABI_ARATH	Enoyl-[acyl-carrier-protein] reductase [NADH], chloroplastic OS=Arabidopsis thaliana GN=MOD1 PE=1 SV=1	MOD1
MD06G1011600	11.2349	19.6202	20.8163	11.2738	1509.27	553.027	1.4484	0.010205	0.097544	FALSE	1535.52	621.101	1.3058	0.00013363	0.0024459	UP	802.73	576.18	0.47839	0.21045	0.56157	FALSE	sp|Q9FVX2|PP129_ARATH	Pentatricopeptide repeat-containing protein At1g77360, mitochondrial OS=Arabidopsis thaliana GN=At1g77360 PE=2 SV=2	At1g77360
MD03G1017600	3.60322	4.17493	5.77419	2.91291	195.753	114.266	0.77663	0.13255	0.43597	FALSE	277.068	128.293	1.1108	0.0049714	0.039494	UP	133.906	118.728	0.17355	0.69914	0.96469	FALSE	--	--	0
MD03G1017800	1.16917	0.190256	0.348249	0.0885361	20.4542	89.9668	-2.137	0.0032448	0.045616	DOWN	38.2086	101.035	-1.4029	0.0080724	0.055847	FALSE	10.1377	93.7008	-3.2083	8.07e-07	2.71e-05	DOWN	sp|Q9SHI3|RLP2_ARATH	Receptor-like protein 2 OS=Arabidopsis thaliana GN=RLP2 PE=2 SV=1	RLP2
MD03G1018200	6.31165	10.5536	9.97705	4.81035	500.41	195.101	1.3589	0.013678	0.11755	FALSE	465.733	219.021	1.0884	0.0037636	0.032223	UP	214.77	202.622	0.084001	0.81085	1	FALSE	--	--	0
MD08G1225000	4.48917	0.868895	1.2953	1.58625	89.8221	321.888	-1.8414	0.001862	0.031724	DOWN	137.062	361.488	-1.3991	0.00042177	0.0059924	DOWN	161.945	335.34	-1.0501	0.030474	0.15927	FALSE	sp|Q8BKU8|TM87B_MOUSE	Transmembrane protein 87B OS=Mus musculus GN=Tmem87b PE=2 SV=1	Tmem87b
MD10G1198700	6.43884	1.13839	2.43454	2.01103	128.606	521.913	-2.0208	0.00066935	0.015447	DOWN	290.104	586.055	-1.0145	0.0062382	0.046371	DOWN	232.764	542.855	-1.2217	0.0073911	0.055486	FALSE	sp|A3KPF8|PP131_ARATH	Pentatricopeptide repeat-containing protein At1g79080, chloroplastic OS=Arabidopsis thaliana GN=At1g79080 PE=2 SV=1	At1g79080
MD03G1019800	0.207679	0.0607895	0.644334	1.62864	7.89329	17.1027	-1.1155	0.50061	0.82764	FALSE	83.9349	19.2211	2.1266	0.26251	0.5694	FALSE	192.835	17.859	3.4326	0.00031003	0.0043871	UP	sp|Q0JEU6|LERK3_ORYSJ	G-type lectin S-receptor-like serine/threonine-protein kinase LECRK3 OS=Oryza sativa subsp. japonica GN=LECRK3 PE=3 SV=2	LECRK3
MD03G1020200	0.0370079	0.0421211	0.387863	0.686719	2.25522	1.25679	0.84352	0.73813	0.96636	FALSE	20.4269	1.41319	3.8534	0.064091	0.23574	FALSE	34.7619	1.31728	4.7219	0.00027046	0.0039258	UP	sp|Q39202|RLK1_ARATH	G-type lectin S-receptor-like serine/threonine-protein kinase RLK1 OS=Arabidopsis thaliana GN=RLK1 PE=2 SV=2	RLK1
MD03G1020500	2.44207	0.255559	0.612718	0.453568	23.6036	172.569	-2.8701	2.79e-05	0.0015046	DOWN	60.6574	193.789	-1.6757	0.00036576	0.0054077	DOWN	44.6032	179.478	-2.0086	0.00027979	0.0040347	DOWN	sp|Q9LXU9|IRKI_ARATH	IRK-interacting protein OS=Arabidopsis thaliana GN=IRKI PE=1 SV=1	IRKI
MD03G1020700	6.81024	8.50779	11.4668	9.16194	647.952	347.789	0.89768	0.071172	0.31345	FALSE	889.335	390.518	1.1873	0.0008854	0.010752	UP	688.462	361.364	0.92992	0.033929	0.17185	FALSE	sp|Q8RWR1|JMJ30_ARATH	Lysine-specific demethylase JMJ30 OS=Arabidopsis thaliana GN=JMJ30 PE=1 SV=1	JMJ30
MD03G1020800	12.997	22.3613	20.2521	23.3363	2908.61	1051.41	1.468	0.007978	0.082558	FALSE	2502.86	1180.87	1.0837	0.0019033	0.019357	UP	2808.94	1094.83	1.3593	0.0015477	0.016086	UP	sp|O23116|EIL3_ARATH	ETHYLENE INSENSITIVE 3-like 3 protein OS=Arabidopsis thaliana GN=EIL3 PE=1 SV=1	EIL3
MD03G1021000	0.665345	0.11569	0.0764134	0.145587	18.1403	66.7096	-1.8787	0.0076396	0.08032	FALSE	10.79	74.9373	-2.796	1.58e-05	0.00042215	DOWN	20.7912	69.5176	-1.7414	0.0091888	0.065531	FALSE	sp|Q9FL59|FTIP1_ARATH	FT-interacting protein 1 OS=Arabidopsis thaliana GN=FTIP1 PE=1 SV=1	FTIP1
MD09G1146700	17.3787	7.61871	6.22336	4.83039	654.278	943.18	-0.52763	0.25904	0.61096	FALSE	512.229	1059.15	-1.048	0.0020559	0.0205	DOWN	379.38	982.214	-1.3724	0.0012839	0.013866	DOWN	sp|Q6PGS5|TM56B_XENLA	Transmembrane protein 56-B OS=Xenopus laevis GN=tmem56-b PE=2 SV=1	tmem56-b
MD03G1023300	1.9316	0.445525	0.471181	0.115987	22.3344	72.6532	-1.7018	0.11226	0.40027	FALSE	26.1828	81.5474	-1.639	0.052214	0.20632	FALSE	5.99644	75.6085	-3.6564	0.0023412	0.022428	DOWN	sp|Q00874|DR100_ARATH	DNA damage-repair/toleration protein DRT100 OS=Arabidopsis thaliana GN=DRT100 PE=2 SV=2	DRT100
MD03G1023600	14.9315	6.31039	5.31439	4.0736	396.706	626.093	-0.6583	0.19652	0.53338	FALSE	334.053	703	-1.0734	0.011949	0.074484	FALSE	243.11	651.991	-1.4232	0.0025379	0.023901	DOWN	sp|Q9SYB9|UNC_ARATH	Serine/threonine-protein kinase UCN OS=Arabidopsis thaliana GN=UNC PE=1 SV=1	UNC
MD03G1024000	6.58436	10.2099	9.73009	5.79816	648.789	263.677	1.299	0.022562	0.15992	FALSE	589.06	296.136	0.99216	0.005598	0.0429	UP	339.216	274.429	0.30577	0.48626	0.84792	FALSE	sp|Q54G07|SLMO_DICDI	Protein slowmo homolog OS=Dictyostelium discoideum GN=slmo PE=3 SV=1	slmo
MD03G1024100	227.753	394.801	394.412	327.4	15430.1	5596.79	1.4631	0.0080649	0.083172	FALSE	14681.9	6285.24	1.224	0.00023687	0.0038562	UP	11869.9	5822.46	1.0276	0.013694	0.088726	FALSE	sp|A3BDI8|SAP8_ORYSJ	Zinc finger A20 and AN1 domain-containing stress-associated protein 8 OS=Oryza sativa subsp. japonica GN=SAP8 PE=2 SV=1	SAP8
MD03G1024200	4.88195	4.41728	6.65638	9.3064	193.782	136.651	0.50393	0.33179	0.68695	FALSE	290.095	153.465	0.91861	0.21392	0.50471	FALSE	383.27	142.133	1.4311	0.0016852	0.017215	UP	sp|Q2RYF4|CCME_RHORT	Cytochrome c-type biogenesis protein CcmE OS=Rhodospirillum rubrum (strain ATCC 11170 / ATH 1.1.1 / DSM 467 / LMG 4362 / NCIB 8255 / S1) GN=ccmE PE=3 SV=1	ccmE
MD03G1026100	0	0.079587	0.434794	1.2474	1.56789	0	Inf	0.47614	0.80967	FALSE	8.82922	0	Inf	0.0057774	0.043863	UP	24.8624	0	Inf	2.33e-05	0.00049528	UP	--	--	0
MD03G1028100	0.383947	1.53712	1.3087	0.889187	83.5	13.0752	2.6749	0.0056668	0.066633	FALSE	68.4001	14.6924	2.2189	0.00030772	0.0047298	UP	44.6182	13.6362	1.7102	0.038877	0.18991	FALSE	sp|Q8GXC7|FBK50_ARATH	F-box/kelch-repeat protein At3g06240 OS=Arabidopsis thaliana GN=At3g06240 PE=2 SV=1	At3g06240
MD03G1028900	1.20248	1.06181	4.18793	11.8471	125.694	99.2168	0.34126	0.485	0.81557	FALSE	508.554	111.469	2.1898	0.0017731	0.018395	UP	1381.72	103.532	3.7383	0.00052591	0.0067537	UP	sp|Q8VZK9|CSLE1_ARATH	Cellulose synthase-like protein E1 OS=Arabidopsis thaliana GN=CSLE1 PE=2 SV=1	CSLE1
MD03G1029100	4.54881	8.85907	9.02108	17.466	1247.6	401.143	1.637	0.0032304	0.045477	UP	1207.64	450.673	1.422	0.0018791	0.019164	UP	2248.83	418.23	2.4268	6.57e-09	3.93e-07	UP	sp|Q651X6|CSLE6_ORYSJ	Cellulose synthase-like protein E6 OS=Oryza sativa subsp. japonica GN=CSLE6 PE=2 SV=1	CSLE6
MD03G1030400	32.1974	7.68727	12.3382	20.2428	724.088	2007.62	-1.4713	0.0067871	0.074618	FALSE	1141.44	2254.84	-0.98217	0.00426	0.03528	DOWN	1858.55	2090.39	-0.1696	0.61366	0.92491	FALSE	sp|Q8W034|RNP1_ARATH	Heterogeneous nuclear ribonucleoprotein 1 OS=Arabidopsis thaliana GN=RNP1 PE=1 SV=1	RNP1
MD14G1090300	14.0125	3.81189	5.04513	7.07068	483.561	1203.77	-1.3158	0.017091	0.13442	FALSE	647.551	1352.09	-1.0621	0.0023066	0.022317	DOWN	884.788	1252.36	-0.50124	0.22441	0.58175	FALSE	sp|Q9C977|PP135_ARATH	Pentatricopeptide repeat-containing protein At1g80270, mitochondrial OS=Arabidopsis thaliana GN=At1g80270 PE=2 SV=1	At1g80270
MD03G1030800	1.16864	3.61119	2.65811	1.75941	123.899	24.2336	2.3541	0.017399	0.13621	FALSE	84.9994	27.2154	1.643	0.0028588	0.026234	UP	53.7122	25.214	1.091	0.14574	0.45544	FALSE	--	--	0
MD16G1225100	1.67122	0.100397	0.301056	0.401844	2.51243	27.5988	-3.4574	0.0032188	0.045441	DOWN	7.18732	30.9965	-2.1086	0.014107	0.083834	FALSE	9.33024	28.7011	-1.6211	0.083669	0.31944	FALSE	sp|Q9M8M3|PP136_ARATH	Pentatricopeptide repeat-containing protein At1g80550, mitochondrial OS=Arabidopsis thaliana GN=At1g80550 PE=2 SV=1	At1g80550
MD03G1031500	0.251485	1.26572	0.853876	1.18443	42.923	4.65242	3.2057	0.29948	0.65515	FALSE	25.1538	5.22643	2.2669	0.14924	0.40634	FALSE	32.395	4.84219	2.742	0.002584	0.024234	UP	sp|Q9ZSD4|SY121_ARATH	Syntaxin-121 OS=Arabidopsis thaliana GN=SYP121 PE=1 SV=1	SYP121
MD03G1031800	7.58097	2.07998	2.48216	1.77186	338.461	789.203	-1.2214	0.018466	0.14154	FALSE	380.416	886.189	-1.22	0.00073917	0.0093484	DOWN	259.45	820.736	-1.6615	0.00028127	0.0040527	DOWN	sp|Q9LRR4|R13L1_ARATH	Putative disease resistance RPP13-like protein 1 OS=Arabidopsis thaliana GN=RPPL1 PE=3 SV=1	RPPL1
MD10G1237000	12.1014	3.19939	4.67617	8.17896	288.964	706.839	-1.2905	0.021566	0.15631	FALSE	407.084	793.756	-0.96337	0.0056013	0.042901	DOWN	693.674	735.555	-0.084576	0.86984	1	FALSE	sp|Q8CGF5|TMM56_MOUSE	Transmembrane protein 56 OS=Mus musculus GN=Tmem56 PE=2 SV=1	Tmem56
MD03G1034800	0.993397	1.64665	1.32285	1.87646	194.526	66.6032	1.5463	0.41986	0.76837	FALSE	133.905	74.7896	0.8403	0.20108	0.48679	FALSE	181.766	69.2968	1.3912	0.0034901	0.031006	UP	sp|Q93Z92|RING4_ARATH	E3 ubiquitin-protein ligase At4g11680 OS=Arabidopsis thaliana GN=At4g11680 PE=2 SV=1	At4g11680
MD03G1034900	28.5546	88.7645	152.847	183.905	7183.58	1574.55	2.1898	0.039102	0.22426	FALSE	12985.5	1768.9	2.876	9.02e-08	5.44e-06	UP	14688.1	1638.67	3.1641	2.52e-12	3.59e-10	UP	sp|O24242|FPPS2_PARAR	Farnesyl pyrophosphate synthase 2 OS=Parthenium argentatum GN=FPS2 PE=2 SV=1	FPS2
MD03G1046000	0.59934	0.148988	0.0489477	0.145639	13.1723	32.7349	-1.3133	0.13759	0.44475	FALSE	4.15417	36.7614	-3.1456	0.00022659	0.0037273	DOWN	11.77	34.1035	-1.5348	0.049271	0.2239	FALSE	sp|Q96MV1|TMM56_HUMAN	Transmembrane protein 56 OS=Homo sapiens GN=TMEM56 PE=1 SV=1	TMEM56
MD03G1036900	1.00713	0.201259	0.252026	0.170337	34.3	131.56	-1.9394	0.040533	0.22864	FALSE	48.3889	147.801	-1.6109	0.017686	0.097964	FALSE	31.5463	136.888	-2.1175	0.0059643	0.047059	DOWN	sp|C0LGR3|Y4265_ARATH	Probable LRR receptor-like serine/threonine-protein kinase At4g26540 OS=Arabidopsis thaliana GN=At4g26540 PE=2 SV=1	At4g26540
MD03G1037600	12.904	4.2154	4.58054	5.92378	442.168	903.94	-1.0316	0.065147	0.29766	FALSE	478.061	1015.31	-1.0866	0.0019079	0.019387	DOWN	599.667	941.97	-0.65152	0.13669	0.43848	FALSE	sp|O65583|UKL4_ARATH	Uridine kinase-like protein 4 OS=Arabidopsis thaliana GN=UKL4 PE=2 SV=2	UKL4
MD03G1039100	1.9706	0.0718067	0.295113	0.062215	1.95349	34.0029	-4.1215	0.0014668	0.026939	DOWN	7.56914	38.2168	-2.336	0.021584	0.11297	FALSE	1.47391	35.4575	-4.5884	0.0013002	0.013998	DOWN	--	--	0
MD03G1039200	8.6325	1.17549	3.56668	4.35737	88.9277	455.969	-2.3582	8.66e-05	0.0034241	DOWN	277.468	512.02	-0.88388	0.016237	0.092513	FALSE	323.531	474.174	-0.55151	0.49943	0.85604	FALSE	sp|Q680K8|Y1576_ARATH	BTB/POZ domain-containing protein At1g55760 OS=Arabidopsis thaliana GN=At1g55760 PE=2 SV=1	At1g55760
MD06G1014200	7.26883	5.54102	8.64631	14.8861	479.391	420.92	0.18765	0.56107	0.87029	FALSE	773.435	472.685	0.7104	0.28424	0.59555	FALSE	1284.78	437.84	1.553	0.00043313	0.0057657	UP	sp|Q6P0S3|TM45B_DANRE	Transmembrane protein 45B OS=Danio rerio GN=tmem45b PE=2 SV=1	tmem45b
MD03G1039700	14.591	9.36467	7.14062	3.48306	106.639	105.641	0.013554	0.91741	1	FALSE	76.889	118.614	-0.62543	0.18905	0.4697	FALSE	36.4471	109.932	-1.5927	0.0047181	0.039077	DOWN	--	--	0
MD03G1010300	12.8287	1.4971	0.20726	0.00829866	63.9446	415.107	-2.6986	0.011608	0.10577	FALSE	9.42072	466.244	-5.6291	1.14e-05	0.00032195	DOWN	0.364877	433.485	-10.214	1.08e-08	6.08e-07	DOWN	sp|Q9NWC5|TM45A_HUMAN	Transmembrane protein 45A OS=Homo sapiens GN=TMEM45A PE=2 SV=1	TMEM45A
MD03G1041500	9.48709	25.3116	17.4372	8.98494	1741.97	398.701	2.1273	0.0073351	0.07838	FALSE	1093.83	447.741	1.2887	0.0001731	0.0030089	UP	546.146	415.177	0.39556	0.30493	0.68228	FALSE	sp|Q52K82|CML21_ARATH	Probable calcium-binding protein CML21 OS=Arabidopsis thaliana GN=CML21 PE=2 SV=1	CML21
MD03G1043600	9.86956	16.4383	16.1514	17.895	2865.3	1064.03	1.4291	0.011921	0.10775	FALSE	2641.96	1195.03	1.1446	0.00087796	0.01068	UP	2853.37	1108.18	1.3645	0.0011956	0.013106	UP	sp|P0CB21|Y4645_ARATH	Uncharacterized protein At4g26450 OS=Arabidopsis thaliana GN=At4g26450 PE=4 SV=1	At4g26450
MD03G1044200	0.733168	1.81713	1.37808	1.68345	176.172	42.1127	2.0647	0.11251	0.40058	FALSE	123.364	47.3033	1.3829	0.070026	0.24949	FALSE	142.421	43.8876	1.6983	0.0013601	0.014488	UP	sp|Q27GK7|TPR4_ARATH	Topless-related protein 4 OS=Arabidopsis thaliana GN=TPR4 PE=1 SV=2	TPR4
MD03G1044600	1.55031	12.5079	20.6675	51.7608	413.447	31.1965	3.7282	0.065604	0.29887	FALSE	668.264	35.0725	4.252	0.10036	0.31541	FALSE	1528.82	32.7003	5.547	1.07e-14	2.49e-12	UP	sp|Q9FH13|RRAA3_ARATH	Putative 4-hydroxy-4-methyl-2-oxoglutarate aldolase 3 OS=Arabidopsis thaliana GN=At5g56260 PE=1 SV=1	At5g56260
MD11G1316400	64.7046	53.424	92.0447	102.64	2598.63	2184.8	0.25025	0.49466	0.82344	FALSE	4677.63	2453.66	0.93084	0.0053303	0.041505	UP	5092.95	2273.18	1.1638	0.0046333	0.038565	UP	sp|Q6GPW4|TM205_XENLA	Transmembrane protein 205 OS=Xenopus laevis GN=tmem205 PE=2 SV=1	tmem205
MD03G1046100	4.52732	1.01005	1.28519	2.35838	91.2003	265.947	-1.544	0.0081205	0.083531	FALSE	113.479	298.527	-1.3954	0.00065087	0.0084513	DOWN	205.797	276.256	-0.42478	0.25423	0.62028	FALSE	sp|F4I111|MCU6_ARATH	Calcium uniporter protein 6, mitochondrial OS=Arabidopsis thaliana GN=At1g09575 PE=2 SV=1	At1g09575
MD15G1407700	0.301463	6.47449	0.817493	0.897272	771.871	19.1805	5.3306	0.20903	0.54904	FALSE	79.3358	21.5311	1.8815	0.06078	0.22771	FALSE	82.6382	19.9715	2.0489	0.00066189	0.0081462	UP	sp|Q6UW68|TM205_HUMAN	Transmembrane protein 205 OS=Homo sapiens GN=TMEM205 PE=1 SV=1	TMEM205
MD03G1047600	26.1785	41.1344	43.0933	32.0008	3866.44	1562.22	1.3074	0.018316	0.14079	FALSE	3878.15	1753.94	1.1448	0.00067471	0.0086924	UP	2803.58	1624.49	0.78728	0.12449	0.41339	FALSE	--	--	0
MD03G1048600	0.243448	1.91632	4.22147	13.3555	267.637	21.5319	3.6357	0.25543	0.60675	FALSE	615.776	24.2084	4.6688	0.16971	0.43983	FALSE	1785.18	22.5451	6.3071	6.73e-10	5.42e-08	UP	sp|C0LGD7|Y1684_ARATH	Probable LRR receptor-like serine/threonine-protein kinase At1g06840 OS=Arabidopsis thaliana GN=At1g06840 PE=2 SV=2	At1g06840
MD03G1048800	0.00465707	0.0564121	0.141426	0.789996	9.0531	0.479185	4.2398	0.23749	0.58468	FALSE	23.7516	0.537826	5.4647	0.10634	0.32785	FALSE	128.505	0.4957	8.0181	0.005441	0.04371	UP	sp|C0LGD7|Y1684_ARATH	Probable LRR receptor-like serine/threonine-protein kinase At1g06840 OS=Arabidopsis thaliana GN=At1g06840 PE=2 SV=2	At1g06840
MD03G1049600	4.89607	0.792016	1.6114	1.23216	92.5337	431.55	-2.2215	0.00027017	0.0079778	DOWN	207.009	484.603	-1.2271	0.0017711	0.018384	DOWN	154.218	449.284	-1.5427	0.0010049	0.011424	DOWN	sp|Q9LVM0|Y5830_ARATH	Probable inactive receptor kinase At5g58300 OS=Arabidopsis thaliana GN=At5g58300 PE=2 SV=1	At5g58300
MD15G1217700	4.99069	0.952889	1.67279	1.37627	54.2095	197.904	-1.8682	0.0027113	0.040736	DOWN	95.952	222.192	-1.2114	0.011676	0.073207	FALSE	77.5234	205.955	-1.4096	0.0060481	0.047565	DOWN	sp|Q5U1Y0|TM192_RAT	Transmembrane protein 192 OS=Rattus norvegicus GN=Tmem192 PE=2 SV=1	Tmem192
MD08G1039400	22.9402	4.15146	7.44615	6.29554	229.96	909.037	-1.983	0.00063141	0.014781	DOWN	425.486	1020.98	-1.2628	0.0006569	0.0084978	DOWN	353.117	946.044	-1.4218	0.0016593	0.01701	DOWN	sp|Q6DFI2|TM147_XENLA	Transmembrane protein 147 OS=Xenopus laevis GN=tmem147 PE=2 SV=1	tmem147
MD08G1228900	17.1618	1.98493	1.10156	5.33	117.105	597.808	-2.3519	1.93e-05	0.0011314	DOWN	59.0676	671.438	-3.5068	9.37e-19	6.95e-16	DOWN	282.446	622.06	-1.1391	0.002494	0.02357	DOWN	sp|Q6IDL4|P24D3_ARATH	Transmembrane emp24 domain-containing protein p24delta3 OS=Arabidopsis thaliana GN=At1g09580 PE=1 SV=1	At1g09580
MD01G1200600	4.51631	0.528609	1.01894	0.98888	31.3325	170.437	-2.4435	7.7e-05	0.0031501	DOWN	54.6039	191.362	-1.8092	7.42e-05	0.0015082	DOWN	53.7441	177.191	-1.7211	0.00085126	0.0099979	DOWN	sp|Q8L856|ACFR1_ARATH	Transmembrane ascorbate ferrireductase 1 OS=Arabidopsis thaliana GN=CYB561A PE=1 SV=1	CYB561A
MD03G1053100	128.271	235.43	187.895	116.174	12691	4313.34	1.5569	0.0054057	0.064701	FALSE	9573.3	4844.1	0.98279	0.0058158	0.044105	UP	5731.44	4487.12	0.35311	0.40436	0.78225	FALSE	sp|Q9LYK9|RS263_ARATH	40S ribosomal protein S26-3 OS=Arabidopsis thaliana GN=RPS26C PE=2 SV=1	RPS26C
MD03G1053200	5.19332	24.1381	14.2222	6.3309	3680.35	472.704	2.9608	0.02065	0.15213	FALSE	1980.98	530.821	1.8999	1.16e-05	0.00032795	UP	831.994	492.11	0.75759	0.10878	0.37994	FALSE	sp|Q5XET5|HESO1_ARATH	Protein HESO1 OS=Arabidopsis thaliana GN=HESO1 PE=1 SV=1	HESO1
MD03G1053500	29.7245	66.1711	51.6339	24.056	10253.9	2813.53	1.8657	0.0080331	0.082904	FALSE	7419.13	3160.19	1.2312	0.00025048	0.0040093	UP	3311.56	2929.32	0.17695	0.62716	0.92855	FALSE	sp|Q9LVL5|WNK4_ARATH	Probable serine/threonine-protein kinase WNK4 OS=Arabidopsis thaliana GN=WNK4 PE=1 SV=1	WNK4
MD03G1054100	0.13946	0.137869	0.498165	0.115469	9.17932	6.22368	0.56062	0.68366	0.9426	FALSE	32.7761	6.99313	2.2286	0.0040936	0.034284	UP	7.09107	6.50458	0.12455	0.81367	1	FALSE	sp|Q7XA39|RGA4_SOLBU	Putative disease resistance protein RGA4 OS=Solanum bulbocastanum GN=RGA4 PE=2 SV=1	RGA4
MD03G1054800	3.26202	0.608755	0.747571	1.02481	69.3541	272.435	-1.9739	0.0026966	0.040596	DOWN	92.5796	305.928	-1.7244	0.00034239	0.0051272	DOWN	124.908	282.999	-1.1799	0.01687	0.10361	FALSE	sp|Q1GJX8|ENGB_RUEST	Probable GTP-binding protein EngB OS=Ruegeria sp. (strain TM1040) GN=engB PE=3 SV=1	engB
MD03G1055500	0	0.0170526	0.0280555	0	0.751741	0	Inf	0.76843	0.97748	FALSE	1.05112	0	Inf	0.65219	0.90962	FALSE	0	0	NA	NA	NA	NA	sp|O64730|P2C26_ARATH	Probable protein phosphatase 2C 26 OS=Arabidopsis thaliana GN=At2g30170 PE=2 SV=2	At2g30170
MD03G1056600	26.5138	56.3466	39.5045	29.6345	6638.85	1902.97	1.8027	0.013892	0.11887	FALSE	4316.42	2136.96	1.0143	0.0028513	0.026182	UP	3132.19	1980.71	0.66115	0.11904	0.4017	FALSE	sp|B9DFS6|SNX2B_ARATH	Sorting nexin 2B OS=Arabidopsis thaliana GN=SNX2B PE=1 SV=1	SNX2B
MD03G1057000	19.6716	0.943202	0.89174	0.989498	23.6787	302.701	-3.6762	0.00021124	0.0066946	DOWN	19.2908	339.711	-4.1383	0.0001058	0.0020209	DOWN	21.0063	313.692	-3.9005	0.00024948	0.0036783	DOWN	--	--	0
MD06G1235000	37.904	207.168	325.527	354.16	20122.6	2408.34	3.0627	2e-08	6.04e-06	UP	32131.6	2703.88	3.5709	2.87e-05	0.00069396	UP	33326.2	2505.1	3.7337	6.14e-09	3.74e-07	UP	sp|Q9ZPS7|TMN3_ARATH	Transmembrane 9 superfamily member 3 OS=Arabidopsis thaliana GN=TMN3 PE=2 SV=1	TMN3
MD03G1058100	9.34567	12.1184	13.1863	9.965	3978.41	1944.41	1.0329	0.06024	0.28481	FALSE	4159.61	2183.62	0.92973	0.0057959	0.04397	UP	3024.71	2023.63	0.57985	0.14652	0.45669	FALSE	sp|Q9FGI1|LTN1_ARATH	E3 ubiquitin-protein ligase listerin OS=Arabidopsis thaliana GN=At5g58410 PE=3 SV=1	At5g58410
MD03G1058400	0.228445	0	0.0252924	0.0296763	0	14.4829	#NAME?	0.0020582	0.033634	DOWN	2.24364	16.2652	-2.8579	0.024519	0.12365	FALSE	2.56854	15.0793	-2.5535	0.06866	0.27997	FALSE	sp|F4I9E1|NFD4_ARATH	Protein NUCLEAR FUSION DEFECTIVE 4 OS=Arabidopsis thaliana GN=NFD4 PE=3 SV=1	NFD4
MD03G1059400	0.016705	0.0238718	0.0684527	0.696381	1.12761	0.499849	1.1737	0.83563	1	FALSE	3.44247	0.562054	2.6147	0.5557	0.8465	FALSE	30.2625	0.523202	5.854	0.00088203	0.01028	UP	sp|Q8L5T5|LBD15_ARATH	LOB domain-containing protein 15 OS=Arabidopsis thaliana GN=LBD15 PE=2 SV=2	LBD15
MD03G1059600	19.8451	54.5369	36.5678	38.966	6818.92	1488.15	2.196	0.018562	0.14193	FALSE	4196.59	1671.21	1.3283	0.00045205	0.006343	UP	4343.82	1549.21	1.4874	0.00047933	0.0062414	UP	sp|Q9C562|CIPKA_ARATH	CBL-interacting serine/threonine-protein kinase 10 OS=Arabidopsis thaliana GN=CIPK10 PE=1 SV=1	CIPK10
MD03G1060100	0.288187	3.52842	3.04449	20.6689	118.989	6.11294	4.2828	0.11754	0.40929	FALSE	91.7434	6.87351	3.7385	0.037646	0.1658	FALSE	627.708	6.42689	6.6098	0.0013459	0.014382	UP	sp|Q8LBW3|LBD12_ARATH	LOB domain-containing protein 12 OS=Arabidopsis thaliana GN=LBD12 PE=2 SV=2	LBD12
MD03G1060200	29.3538	44.8462	47.6609	33.5443	3449.6	1449.61	1.2508	0.020885	0.15311	FALSE	3551.96	1627.79	1.1257	0.00084794	0.010411	UP	2417.15	1508.24	0.68044	0.091445	0.33931	FALSE	sp|F4IMQ0|FLX_ARATH	Protein FLC EXPRESSOR OS=Arabidopsis thaliana GN=FLX PE=1 SV=1	FLX
MD03G1061600	36.4262	28.4196	56.8953	77.5333	1337.22	1204.26	0.1511	0.62969	0.91015	FALSE	2783.39	1352.73	1.041	0.00136	0.015039	UP	3729.3	1255.1	1.5711	8.74e-05	0.0015277	UP	sp|Q9LMK2|LSH6_ARATH	Protein LIGHT-DEPENDENT SHORT HYPOCOTYLS 6 OS=Arabidopsis thaliana GN=LSH6 PE=1 SV=1	LSH6
MD03G1062100	11.8054	1.36974	2.62723	2.52376	74.5465	483.128	-2.6962	0.0019695	0.03271	DOWN	153.955	542.585	-1.8173	0.015592	0.089984	FALSE	142.745	504.027	-1.8201	0.038912	0.19004	FALSE	sp|O22558|STY8_ARATH	Serine/threonine-protein kinase STY8 OS=Arabidopsis thaliana GN=STY8 PE=1 SV=2	STY8
MD03G1062300	5.29079	4.80303	7.7562	11.4332	189.872	138.428	0.45589	0.35803	0.7117	FALSE	308.259	155.437	0.98781	0.014179	0.084129	FALSE	443.049	143.856	1.6228	0.00043467	0.0057826	UP	sp|Q9FLE8|Y5986_ARATH	Uncharacterized protein At5g39865 OS=Arabidopsis thaliana GN=At5g39865 PE=2 SV=1	At5g39865
MD03G1063500	0	0.0101212	0.0227441	0	0.375871	0	Inf	0.94403	1	FALSE	0.863357	0	Inf	0.78057	0.97663	FALSE	0	0	NA	NA	NA	NA	sp|Q9SCZ4|FERON_ARATH	Receptor-like protein kinase FERONIA OS=Arabidopsis thaliana GN=FER PE=1 SV=1	FER
MD03G1063900	2.15286	0.826401	0.8288	0.315531	45.1756	87.3685	-0.95157	0.28904	0.64446	FALSE	49.2176	98.1495	-0.99581	0.061796	0.23031	FALSE	18.0661	91.1694	-2.3353	0.00031165	0.0044039	DOWN	sp|Q8RX71|BAG4_ARATH	BAG family molecular chaperone regulator 4 OS=Arabidopsis thaliana GN=BAG4 PE=1 SV=1	BAG4
MD03G1064800	11.2872	15.8898	19.1104	12.1214	2187.22	991.878	1.1409	0.0405	0.22858	FALSE	2498.49	1113.84	1.1655	0.00045619	0.0063923	UP	1534.16	1032.44	0.57139	0.13123	0.42743	FALSE	sp|Q9MB58|F26_ARATH	6-phosphofructo-2-kinase/fructose-2,6-bisphosphatase OS=Arabidopsis thaliana GN=FKFBP PE=1 SV=1	FKFBP
MD03G1065300	0.561468	0.342614	0.156956	0.240143	111.153	107.448	0.048915	0.87894	1	FALSE	44.5907	120.701	-1.4366	0.0030323	0.027449	DOWN	65.2637	112.064	-0.77997	0.23367	0.59385	FALSE	sp|Q0WNJ6|CLAH1_ARATH	Clathrin heavy chain 1 OS=Arabidopsis thaliana GN=CHC1 PE=1 SV=1	CHC1
MD03G1066000	9.92188	6.51809	3.11967	3.07701	712.071	774.914	-0.12202	0.90808	1	FALSE	358.98	869.804	-1.2768	0.0066318	0.048419	DOWN	350.617	804.476	-1.1982	0.010184	0.070652	FALSE	sp|P31752|ASNS_ASPOF	Asparagine synthetase [glutamine-hydrolyzing] OS=Asparagus officinalis PE=2 SV=2	2
MD03G1066200	10.6681	0.567546	1.21639	2.12862	43.306	606.373	-3.8076	1.04e-09	6.13e-07	DOWN	101.707	680.769	-2.7428	2.04e-12	4.15e-10	DOWN	167.742	630.631	-1.9106	0.00052212	0.0067155	DOWN	sp|Q9LUZ6|TBL44_ARATH	Protein PMR5 OS=Arabidopsis thaliana GN=PMR5 PE=2 SV=1	PMR5
MD03G1067200	21.8661	27.8311	31.1934	35.4863	1814.64	901.189	1.0098	0.06418	0.29492	FALSE	1930.71	1012.15	0.93171	0.005715	0.043535	UP	2149.64	938.419	1.1958	0.0039375	0.033996	UP	sp|Q9STZ2|SELT_ARATH	SelT-like protein OS=Arabidopsis thaliana GN=At3g47300 PE=2 SV=2	At3g47300
MD03G1067800	1.16812	1.35693	1.85099	2.14437	164.365	93.793	0.80935	0.12438	0.42162	FALSE	224.758	105.347	1.0932	0.0082999	0.05697	FALSE	250.633	97.67	1.3596	0.0031448	0.028551	UP	sp|Q7XA39|RGA4_SOLBU	Putative disease resistance protein RGA4 OS=Solanum bulbocastanum GN=RGA4 PE=2 SV=1	RGA4
MD03G1068200	0	0.0170805	0.00994875	0	1.706	0	Inf	0.54855	0.86062	FALSE	0.700745	0	Inf	0.80136	0.98294	FALSE	0	0	NA	NA	NA	NA	sp|B8AVF0|BGL12_ORYSI	Beta-glucosidase 12 OS=Oryza sativa subsp. indica GN=BGLU12 PE=3 SV=1	BGLU12
MD03G1068500	62.9767	100.296	32.3667	10.9789	21586	7982.06	1.4353	0.22674	0.57165	FALSE	6188.72	8962.2	-0.53421	0.42805	0.74375	FALSE	2024.61	8305.13	-2.0364	6.71e-07	2.3e-05	DOWN	sp|O80875|SMXL7_ARATH	Protein SMAX1-LIKE 7 OS=Arabidopsis thaliana GN=SMXL7 PE=1 SV=1	SMXL7
MD03G1069500	0.336549	0.92472	0.804837	0.490963	120.841	26.6249	2.1823	0.021597	0.15637	FALSE	95.2152	29.8962	1.6712	0.0011282	0.013027	UP	57.5251	27.6842	1.0551	0.16276	0.48577	FALSE	sp|A3RF67|BAGBG_DALNI	Isoflavonoid 7-O-beta-apiosyl-glucoside beta-glycosidase OS=Dalbergia nigrescens PE=1 SV=1	1
MD03G1070600	52.4676	160.524	102.095	53.4285	19021.5	3770.21	2.3349	0.013456	0.11623	FALSE	11135.8	4233.07	1.3954	0.00055447	0.0074103	UP	5554.95	3920.48	0.50274	0.3695	0.74943	FALSE	sp|O65573|Y5872_ARATH	SMR domain-containing protein At5g58720 OS=Arabidopsis thaliana GN=PIPC PE=1 SV=1	PIPC
MD03G1070800	5.35727	9.60667	8.37424	4.09118	374.554	129.725	1.5297	0.010907	0.10176	FALSE	308.887	145.669	1.0844	0.0061808	0.046034	UP	144.38	134.957	0.097364	0.84137	1	FALSE	sp|Q9CQ48|NUDC2_MOUSE	NudC domain-containing protein 2 OS=Mus musculus GN=Nudcd2 PE=1 SV=1	Nudcd2
MD03G1070900	1.50476	0.0963319	0.00883763	0	7.31317	89.4167	-3.612	4.3e-05	0.0020452	DOWN	0.700745	100.363	-7.1621	7.58e-10	8.54e-08	DOWN	0	92.9484	#NAME?	6.35e-11	6.53e-09	DOWN	sp|Q93Z81|CAX3_ARATH	Vacuolar cation/proton exchanger 3 OS=Arabidopsis thaliana GN=CAX3 PE=1 SV=1	CAX3
MD03G1071800	29.9314	68.4127	45.1168	40.688	7383.96	1998.94	1.8852	0.0028058	0.041522	UP	4542.64	2244.86	1.0169	0.0024981	0.023686	UP	4026.91	2081.59	0.95199	0.10157	0.36404	FALSE	sp|Q8L7Y9|NPC1_ARATH	Non-specific phospholipase C1 OS=Arabidopsis thaliana GN=NPC1 PE=2 SV=1	NPC1
MD03G1071900	14.2096	1.98221	3.8102	6.20604	304.193	1580.58	-2.3774	4.34e-05	0.0020581	DOWN	614.358	1775.35	-1.531	1.5e-05	0.00040357	DOWN	989.585	1646.17	-0.73422	0.099645	0.35902	FALSE	sp|O81643|VILI1_ARATH	Villin-1 OS=Arabidopsis thaliana GN=VLN1 PE=2 SV=2	VLN1
MD03G1072300	19.865	48.6192	55.167	32.5749	4631.32	1205.98	1.9412	0.00040745	0.010852	UP	5039.61	1354.24	1.8958	2.77e-08	1.97e-06	UP	2874.1	1255.28	1.1951	0.0027371	0.025467	UP	sp|Q5FWP4|CHFR_XENLA	E3 ubiquitin-protein ligase CHFR OS=Xenopus laevis GN=chfr PE=1 SV=1	chfr
MD03G1072400	2.18363	15.858	11.6018	7	1301.41	102.12	3.6717	0.10191	0.37902	FALSE	808.237	114.758	2.8162	2.48e-07	1.3e-05	UP	467.587	106.814	2.1301	1.39e-05	0.00032214	UP	sp|Q9LUX9|FQRL3_ARATH	Probable NAD(P)H dehydrogenase (quinone) FQR1-like 3 OS=Arabidopsis thaliana GN=At5g58800 PE=2 SV=1	At5g58800
MD03G1073300	18.0925	6.22274	4.73384	8.0815	380.345	693.648	-0.8669	0.082164	0.33821	FALSE	272.173	779.116	-1.5173	0.0021213	0.02092	DOWN	436.115	723.643	-0.73057	0.29344	0.66987	FALSE	--	--	0
MD03G1073700	7.94315	10.0714	32.2527	32.4264	153.086	75.2562	1.0245	0.12384	0.42061	FALSE	454.046	84.5123	2.4256	0.0048758	0.038924	UP	435.612	78.3252	2.4755	0.025236	0.13916	FALSE	--	--	0
MD03G1073800	9.40543	17.5869	16.9445	8.99531	1512.23	491.165	1.6224	0.053597	0.26689	FALSE	1315.29	551.478	1.254	0.00023986	0.0038902	UP	666.785	510.481	0.38537	0.27991	0.65364	FALSE	sp|O80361|RK4_TOBAC	50S ribosomal protein L4, chloroplastic OS=Nicotiana tabacum GN=RPL4 PE=2 SV=1	RPL4
MD03G1076700	48.7857	160.815	90.2835	85.1066	5451.83	998.315	2.4492	0.0046113	0.058023	FALSE	2841.53	1121.25	1.3416	0.0014465	0.015778	UP	2590.12	1039.23	1.3175	0.044621	0.20929	FALSE	sp|Q9M390|PTR1_ARATH	Protein NRT1/ PTR FAMILY 8.1 OS=Arabidopsis thaliana GN=NPF8.1 PE=1 SV=1	NPF8.1
MD03G1076900	48.8865	149.355	93.1403	143.011	4130.5	815.921	2.3398	0.0061738	0.070166	FALSE	2390.49	916.412	1.3832	0.00071383	0.00909	UP	3628.01	849.141	2.0951	0.030836	0.16066	FALSE	sp|Q9M390|PTR1_ARATH	Protein NRT1/ PTR FAMILY 8.1 OS=Arabidopsis thaliana GN=NPF8.1 PE=1 SV=1	NPF8.1
MD03G1078000	127.765	108.803	81.9693	41.7099	5336.81	4164.26	0.35792	0.45052	0.79205	FALSE	3985.35	4676.9	-0.23085	0.56543	0.85309	FALSE	2003.2	4336.14	-1.1141	0.0042419	0.035953	DOWN	--	--	0
MD03G1078200	2.68037	0.629946	0.526315	0.866697	47.5758	126.434	-1.4101	0.021053	0.154	FALSE	37.9084	142.024	-1.9055	4.99e-05	0.0010945	DOWN	59.798	131.854	-1.1408	0.026868	0.14536	FALSE	sp|Q9ZWG1|PUMP2_ARATH	Mitochondrial uncoupling protein 2 OS=Arabidopsis thaliana GN=PUMP2 PE=2 SV=1	PUMP2
MD03G1078500	21.5597	4.45449	9.58658	10.8119	446.241	1542.52	-1.7894	0.0018128	0.0312	DOWN	1002.77	1732.42	-0.78881	0.026816	0.13162	FALSE	1111.77	1605.72	-0.53036	0.24045	0.60314	FALSE	sp|Q9ZW34|ENO3_ARATH	Cytosolic enolase 3 OS=Arabidopsis thaliana GN=ENO3 PE=1 SV=1	ENO3
MD03G1079800	5.70575	1.26349	2.44819	1.18392	85.2042	272.233	-1.6758	0.0070845	0.076688	FALSE	172.46	305.62	-0.82548	0.039255	0.17026	FALSE	79.5572	282.925	-1.8304	0.00025262	0.0037193	DOWN	--	--	0
MD03G1080800	7.46322	1.34897	1.48512	1.07803	167.481	563.102	-1.7494	0.00097834	0.02025	DOWN	163.518	632.464	-1.9515	2.75e-07	1.42e-05	DOWN	114.51	586.709	-2.3572	5.6e-07	1.95e-05	DOWN	sp|B9FDE0|BSK3_ORYSJ	Probable serine/threonine-protein kinase BSK3 OS=Oryza sativa subsp. japonica GN=BSK3 PE=1 SV=1	BSK3
MD03G1081000	31.2187	131.369	83.6659	99.2414	14595.7	2063.87	2.8221	0.013179	0.11477	FALSE	8555.87	2317.86	1.8841	0.0022758	0.022072	UP	9862.08	2148.72	2.1984	0.0016629	0.01703	UP	sp|B9FDE0|BSK3_ORYSJ	Probable serine/threonine-protein kinase BSK3 OS=Oryza sativa subsp. japonica GN=BSK3 PE=1 SV=1	BSK3
MD03G1081800	90.6405	30.3211	27.4211	20.3893	693.078	1395.21	-1.0094	0.074352	0.3217	FALSE	626.825	1566.77	-1.3217	0.00017026	0.0029671	DOWN	449.316	1452.86	-1.6931	8.79e-05	0.0015321	DOWN	sp|P04795|HSP15_SOYBN	17.6 kDa class I heat shock protein OS=Glycine max GN=HSP17.6-L PE=3 SV=1	HSP17.6-L
MD15G1144600	1.91169	0.70141	0.755557	0.309009	71.5207	137.094	-0.93874	0.2015	0.5396	FALSE	81.6775	153.987	-0.9148	0.23884	0.53909	FALSE	32.4833	143.097	-2.1392	0.004315	0.036455	DOWN	sp|Q8RWW1|TMN10_ARATH	Transmembrane 9 superfamily member 10 OS=Arabidopsis thaliana GN=TMN10 PE=2 SV=1	TMN10
MD03G1082800	0.725276	24.6325	63.1186	140.154	838.46	16.4105	5.675	0.0039643	0.052622	FALSE	2180.72	18.4433	6.8856	3.55e-06	0.00012284	UP	4609.89	17.2112	8.0652	1.03e-36	5.31e-33	UP	sp|Q8LGG8|USPAL_ARATH	Universal stress protein A-like protein OS=Arabidopsis thaliana GN=At3g01520 PE=1 SV=2	At3g01520
MD03G1083600	26.1465	36.1914	39.7169	29.7179	5747.29	2646.26	1.1189	0.045335	0.24387	FALSE	5944.61	2972.11	1.0001	0.0019179	0.019462	UP	4345.39	2756.02	0.6569	0.078899	0.30736	FALSE	sp|Q40392|TMVRN_NICGU	TMV resistance protein N OS=Nicotiana glutinosa GN=N PE=1 SV=1	N
MD03G1084700	76.7599	204.704	209.081	158.307	9069.46	2187.46	2.0518	0.00012174	0.0044448	UP	9096.86	2456.38	1.8888	0.0034361	0.03014	UP	6727.39	2276.36	1.5633	0.017298	0.1053	FALSE	sp|Q40193|RB11C_LOTJA	Ras-related protein Rab11C OS=Lotus japonicus GN=RAB11C PE=2 SV=1	RAB11C
MD03G1084900	0.736861	1.54355	1.40085	0.952215	128.692	39.1496	1.7169	0.0070228	0.076243	FALSE	112.847	43.9435	1.3606	0.0052289	0.040957	UP	74.389	40.65	0.87184	0.1522	0.46732	FALSE	--	--	0
MD03G1085000	0.098602	1.59045	7.91406	22.0496	138.47	5.32269	4.7013	0.071013	0.31305	FALSE	697.889	5.98191	6.8662	0.054469	0.21179	FALSE	1794.68	5.58741	8.3273	1.51e-11	1.81e-09	UP	sp|Q945B6|AOP1L_ARATH	Probable 2-oxoglutarate-dependent dioxygenase AOP1.2 OS=Arabidopsis thaliana GN=AOP1.2 PE=2 SV=1	AOP1.2
MD03G1085200	15.291	18.5108	27.0328	40.8162	1412.64	753.148	0.90739	0.088586	0.35254	FALSE	2020.66	846.286	1.2556	0.00025855	0.0040961	UP	3005.59	786.87	1.9334	0.00041345	0.0055428	UP	sp|Q8VWZ8|SMO22_ARATH	Methylsterol monooxygenase 2-2 OS=Arabidopsis thaliana GN=SMO2-2 PE=2 SV=1	SMO2-2
MD03G1085500	76.6396	119.503	115.838	96.5005	7991.4	3339.14	1.259	0.014666	0.12252	FALSE	7636.56	3749.71	1.0261	0.0025705	0.024232	UP	6188.52	3474.58	0.83276	0.045651	0.21276	FALSE	sp|P0DKI3|TRNH1_ARATH	Tropinone reductase homolog At1g07440 OS=Arabidopsis thaliana GN=At1g07440 PE=1 SV=1	At1g07440
MD03G1085700	20.2111	25.4566	34.8505	35.9175	1733.74	930.33	0.89807	0.06359	0.29343	FALSE	2380.8	1045.16	1.1877	0.018077	0.099445	FALSE	2440.25	969.76	1.3313	0.0014003	0.014816	UP	sp|P0DKI3|TRNH1_ARATH	Tropinone reductase homolog At1g07440 OS=Arabidopsis thaliana GN=At1g07440 PE=1 SV=1	At1g07440
MD03G1089300	2.48612	0.0972717	0.297042	0.510824	9.83489	173.979	-4.1449	1.17e-08	3.94e-06	DOWN	29.4894	195.48	-2.7288	6.29e-06	0.00019778	DOWN	50.3903	181.445	-1.8483	0.0025607	0.024082	DOWN	sp|Q9XE58|SCL14_ARATH	Scarecrow-like protein 14 OS=Arabidopsis thaliana GN=SCL14 PE=2 SV=2	SCL14
MD03G1090900	0.0372065	25.3059	119.403	412.431	1793.21	1.67399	10.065	0.03711	0.21718	FALSE	8753.36	1.87833	12.186	0.0043969	0.036127	UP	27471.2	1.73048	13.954	1.35e-17	5.29e-15	UP	sp|O50048|MDL2_PRUSE	(R)-mandelonitrile lyase 2 OS=Prunus serotina GN=MDL2 PE=2 SV=1	MDL2
MD03G1091000	2.21807	5.93222	7.33422	7.99133	294.859	70.146	2.0716	0.00045787	0.011781	UP	352.191	78.7789	2.1605	9.93e-08	5.9e-06	UP	374.353	72.8961	2.3605	0.0011164	0.0124	UP	sp|Q9ZUL5|CHR19_ARATH	Protein CHROMATIN REMODELING 19 OS=Arabidopsis thaliana GN=ETL1 PE=1 SV=1	ETL1
MD03G1091100	0.163501	2.89203	5.68767	20.5091	299.804	10.5036	4.8351	0.075589	0.32425	FALSE	579.113	11.8026	5.6167	0.030054	0.1427	FALSE	1861.68	10.9899	7.4043	0.00080018	0.0094902	UP	sp|P52707|MDL3_PRUSE	(R)-mandelonitrile lyase 3 OS=Prunus serotina GN=MDL3 PE=2 SV=1	MDL3
MD03G1091700	0	0.00480151	0.0895942	1.94403	0.375871	0	Inf	0.94403	1	FALSE	6.89984	0	Inf	0.023997	0.12165	FALSE	140.63	0	Inf	3.21e-06	9e-05	UP	sp|Q945K2|MDL2_PRUDU	(R)-mandelonitrile lyase 2 OS=Prunus dulcis GN=MDL2 PE=1 SV=1	MDL2
MD03G1091800	0	0.0127201	0.231122	4.51085	0.375871	0	Inf	0.94403	1	FALSE	7.0939	0	Inf	0.15832	0.42082	FALSE	126.891	0	Inf	3.32e-06	9.26e-05	UP	sp|Q9SSM2|MDLL_ARATH	(R)-mandelonitrile lyase-like OS=Arabidopsis thaliana GN=At1g73050 PE=2 SV=1	At1g73050
MD03G1091900	0.0466498	6.10789	17.346	90.4156	511.938	2.47396	7.693	0.061297	0.28744	FALSE	1483.12	2.77779	9.0605	0.014368	0.084907	FALSE	7310.05	2.58023	11.468	2.07e-07	8.16e-06	UP	sp|P52707|MDL3_PRUSE	(R)-mandelonitrile lyase 3 OS=Prunus serotina GN=MDL3 PE=2 SV=1	MDL3
MD03G1092100	1.07312	3.18155	5.19169	10.5419	310.54	62.572	2.3112	0.022701	0.16062	FALSE	475.398	70.2985	2.7576	0.025548	0.12715	FALSE	911.623	65.2865	3.8036	4.3e-16	1.24e-13	UP	sp|Q9LTC0|PBL19_ARATH	Probable serine/threonine-protein kinase PBL19 OS=Arabidopsis thaliana GN=PBL19 PE=1 SV=1	PBL19
MD07G1093200	6.62887	4.49793	8.33997	15.7184	378.261	364.854	0.052063	0.83735	1	FALSE	701.88	410.024	0.77552	0.21134	0.5015	FALSE	1284.83	379.854	1.7581	4.53e-05	0.00087171	UP	sp|Q9LTC0|PBL19_ARATH	Probable serine/threonine-protein kinase PBL19 OS=Arabidopsis thaliana GN=PBL19 PE=1 SV=1	PBL19
MD03G1092700	12.4777	35.6135	24.2951	19.4196	2395.33	508.129	2.237	0.0077258	0.080735	FALSE	1520.64	570.597	1.4141	0.001364	0.015076	UP	1173.06	528.759	1.1496	0.033102	0.16897	FALSE	sp|Q9LTJ1|MBD6_ARATH	Methyl-CpG-binding domain-containing protein 6 OS=Arabidopsis thaliana GN=MBD6 PE=1 SV=1	MBD6
MD03G1093800	2.43864	1.01914	0.434556	0.561589	31.2619	49.6288	-0.66677	0.34643	0.70078	FALSE	13.567	55.7489	-2.0388	0.0016792	0.017687	DOWN	16.1841	51.693	-1.6754	0.023908	0.13355	FALSE	--	--	0
MD03G1094200	0.305438	0.0413081	0.00433829	0.0676078	3.44725	17.0723	-2.3081	0.095397	0.36585	FALSE	0.371577	19.189	-5.6905	0.00035892	0.0053251	DOWN	5.57298	17.8212	-1.6771	0.12009	0.40399	FALSE	sp|Q8LPS2|ACD6_ARATH	Protein ACCELERATED CELL DEATH 6 OS=Arabidopsis thaliana GN=ACD6 PE=1 SV=1	ACD6
MD03G1094800	6.84772	12.6175	10.0401	5.54185	1577.21	511.688	1.624	0.092114	0.36	FALSE	1139.19	574.63	0.98731	0.005463	0.042175	UP	601.321	532.46	0.17546	0.64339	0.93614	FALSE	sp|Q9LQN6|P2C04_ARATH	Probable protein phosphatase 2C 4 OS=Arabidopsis thaliana GN=PLL5 PE=2 SV=1	PLL5
MD03G1094900	4.15747	0.151162	0.20565	0.316362	8.79025	141.45	-4.0082	2.2e-05	0.0012514	DOWN	10.0539	158.921	-3.9825	3.9e-05	0.00089105	DOWN	15.1606	147.214	-3.2795	0.00044059	0.0058469	DOWN	sp|Q05785|ENT2_YEAST	Epsin-2 OS=Saccharomyces cerevisiae (strain ATCC 204508 / S288c) GN=ENT2 PE=1 SV=1	ENT2
MD03G1095400	0.882049	0.0787197	0.0561264	0.0187927	1.97597	16.2113	-3.0364	0.038111	0.2205	FALSE	1.42269	18.1995	-3.6772	0.005496	0.042374	DOWN	0.57227	16.8764	-4.8822	0.0016144	0.016644	DOWN	--	--	0
MD03G1096000	3.35728	0.497961	0.855277	0.145093	28.4785	149.41	-2.3913	0.00046546	0.011919	DOWN	53.0696	167.844	-1.6612	0.010812	0.069032	FALSE	8.82905	155.826	-4.1415	1.35e-10	1.3e-08	DOWN	sp|A0ZZ93|TI214_GOSBA	Protein TIC 214 OS=Gossypium barbadense GN=TIC214 PE=3 SV=1	TIC214
MD06G1227100	13.1531	18.5704	18.7963	15.7769	2340.98	1067.18	1.1333	0.033346	0.20351	FALSE	2311.63	1198.71	0.94742	0.0046894	0.037807	UP	1882.15	1111.12	0.76037	0.068471	0.27951	FALSE	sp|Q9MUK5|TOC64_PEA	Translocon at the outer membrane of chloroplasts 64 OS=Pisum sativum GN=TOC64 PE=1 SV=1	TOC64
MD03G1096300	8.24918	1.65635	3.11689	6.63699	210.856	727.491	-1.7867	0.002327	0.036702	DOWN	414.386	816.722	-0.97887	0.0043462	0.035813	DOWN	849.248	755.531	0.16869	0.66358	0.94702	FALSE	sp|Q9SNC6|PUB13_ARATH	U-box domain-containing protein 13 OS=Arabidopsis thaliana GN=PUB13 PE=1 SV=1	PUB13
MD03G1097000	155.681	310.555	254.857	265.533	5380.13	1651.65	1.7037	0.043395	0.23752	FALSE	4108.02	1854.4	1.1475	0.00069727	0.0089265	UP	4126.07	1718.88	1.2633	0.1132	0.38975	FALSE	sp|P0CG89|H4_SOYBN	Histone H4 OS=Glycine max PE=3 SV=1	3
MD03G1099300	8.7011	42.2551	36.6368	67.9691	1334	154.023	3.1145	0.1217	0.41686	FALSE	1054.76	173.076	2.6074	0.31491	0.63177	FALSE	1837.07	160.778	3.5143	0.0026717	0.024932	UP	sp|Q42410|ZAT12_ARATH	Zinc finger protein ZAT12 OS=Arabidopsis thaliana GN=ZAT12 PE=2 SV=1	ZAT12
MD03G1099800	0.502669	0.0714028	0.0864298	0.323766	8.26352	33.943	-2.0383	0.015015	0.12427	FALSE	8.68387	38.1171	-2.134	0.0053469	0.04157	DOWN	32.5256	35.2937	-0.11784	0.78859	0.99468	FALSE	sp|Q9LX14|UFC_ARATH	Protein UPSTREAM OF FLC OS=Arabidopsis thaliana GN=UFC PE=2 SV=1	UFC
MD03G1100100	0.962845	2.07599	2.53674	1.62789	61.6611	19.0256	1.6964	0.017999	0.1393	FALSE	76.677	21.3623	1.8437	0.0014069	0.015454	UP	48.1287	19.775	1.2832	0.083879	0.31997	FALSE	sp|Q9LIH6|UNG_ARATH	Uracil-DNA glycosylase, mitochondrial OS=Arabidopsis thaliana GN=UNG PE=1 SV=1	UNG
MD03G1100200	0.595247	1.15702	2.82743	5.15898	48.5258	18.0868	1.4238	0.17262	0.49902	FALSE	134.391	20.3205	2.7254	0.042196	0.17831	FALSE	233.626	18.8799	3.6293	7.5e-09	4.37e-07	UP	sp|O82598|TIP13_ARATH	Aquaporin TIP1-3 OS=Arabidopsis thaliana GN=TIP1-3 PE=1 SV=1	TIP1-3
MD03G1100400	2.16296	2.2666	2.89874	5.52695	164.122	93.893	0.80568	0.31393	0.67007	FALSE	187.773	105.487	0.83193	0.11785	0.35097	FALSE	351.315	97.8818	1.8437	0.0024766	0.023442	UP	--	--	0
MD03G1100600	4.38937	15.8515	8.61234	3.14298	1618.79	265.125	2.6102	0.089548	0.35463	FALSE	768.563	297.765	1.368	7.33e-05	0.0014954	UP	269.132	276.428	-0.038594	0.87934	1	FALSE	sp|Q9FN89|RIBA3_ARATH	Monofunctional riboflavin biosynthesis protein RIBA 3, chloroplastic OS=Arabidopsis thaliana GN=RIBA3 PE=1 SV=1	RIBA3
MD15G1164100	6.94599	13.9935	11.4202	8.18851	2363.13	718.176	1.7183	0.01619	0.12979	FALSE	1780.86	806.615	1.1426	0.00076593	0.0096093	UP	1239.71	747.838	0.72921	0.077734	0.30426	FALSE	sp|Q6S5G3|TOC90_ARATH	Translocase of chloroplast 90, chloroplastic OS=Arabidopsis thaliana GN=TOC90 PE=1 SV=1	TOC90
MD03G1101300	0.262623	0.03276	0.0036712	0.00404512	2.82433	17.4171	-2.6245	0.05258	0.26475	FALSE	0.371577	19.5564	-5.7178	0.00029678	0.0045963	DOWN	0.364877	18.1284	-5.6347	0.0010309	0.011655	DOWN	sp|P93149|C93B1_GLYEC	Licodione synthase OS=Glycyrrhiza echinata GN=CYP93B1 PE=1 SV=2	CYP93B1
MD03G1102100	38.1758	12.5817	14.1434	5.57183	745.624	1538.88	-1.0454	0.061227	0.28727	FALSE	833.186	1727.42	-1.0519	0.029657	0.14132	FALSE	324.068	1599.83	-2.3035	2.73e-05	0.00056795	DOWN	sp|Q58FZ0|NAKR2_ARATH	Protein SODIUM POTASSIUM ROOT DEFECTIVE 2 OS=Arabidopsis thaliana GN=NAKR2 PE=2 SV=1	NAKR2
MD03G1103900	370.921	98.856	120.288	119.801	8995.28	22460.6	-1.3202	0.012278	0.10978	FALSE	10831.8	25222.6	-1.2194	0.00029491	0.0045708	DOWN	10415.8	23361	-1.1653	0.0052367	0.042421	DOWN	sp|O64937|EF1A_ORYSJ	Elongation factor 1-alpha OS=Oryza sativa subsp. japonica GN=REFA1 PE=2 SV=2	REFA1
MD03G1285700	23.4616	31.8165	39.73	18.2634	6539.28	3276.43	0.99701	0.047682	0.25162	FALSE	8346.12	3679.29	1.1817	0.00029898	0.0046223	UP	3698.5	3408.71	0.11771	0.7269	0.97626	FALSE	sp|O81283|TC159_ARATH	Translocase of chloroplast 159, chloroplastic OS=Arabidopsis thaliana GN=TOC159 PE=1 SV=1	TOC159
MD03G1105700	1.07238	0.168524	0.211864	0.257161	12.0871	49.7893	-2.0424	0.010112	0.097046	FALSE	14.4061	55.9268	-1.9569	0.0028945	0.026461	DOWN	16.4204	51.961	-1.6619	0.050819	0.22813	FALSE	sp|Q9LZU5|KN5D_ARATH	Kinesin-like protein KIN-5D OS=Arabidopsis thaliana GN=KIN5D PE=2 SV=1	KIN5D
MD03G1105800	1.0859	0.153194	0.262396	0.470073	16.4184	83.7513	-2.3508	0.0021277	0.03452	DOWN	29.4493	94.0683	-1.6755	0.0018341	0.018842	DOWN	49.7979	87.2815	-0.80959	0.41502	0.79141	FALSE	sp|Q9LZU5|KN5D_ARATH	Kinesin-like protein KIN-5D OS=Arabidopsis thaliana GN=KIN5D PE=2 SV=1	KIN5D
MD03G1106300	0	0.00284556	0.00349701	0	0.375871	0	Inf	0.94403	1	FALSE	0.491781	0	Inf	0.96344	1	FALSE	0	0	NA	NA	NA	NA	sp|Q9FJD6|RBOHH_ARATH	Putative respiratory burst oxidase homolog protein H OS=Arabidopsis thaliana GN=RBOHH PE=3 SV=1	RBOHH
MD11G1305100	29.7127	35.4547	46.3214	26.7395	8024.79	4464.35	0.84601	0.097046	0.36977	FALSE	10458.5	5012.92	1.061	0.0011252	0.012997	UP	5847.73	4642.48	0.33298	0.39474	0.77366	FALSE	sp|O81283|TC159_ARATH	Translocase of chloroplast 159, chloroplastic OS=Arabidopsis thaliana GN=TOC159 PE=1 SV=1	TOC159
MD03G1108200	424.16	79.3176	157.093	484.952	5606.82	20072.3	-1.84	0.00088015	0.018771	DOWN	11078.9	22544.5	-1.025	0.001633	0.017329	DOWN	33859.3	20906.3	0.69562	0.097275	0.35346	FALSE	sp|Q05431|APX1_ARATH	L-ascorbate peroxidase 1, cytosolic OS=Arabidopsis thaliana GN=APX1 PE=1 SV=2	APX1
MD03G1109700	0	0.0659756	0.0195819	0	1.19202	0	Inf	0.60398	0.89495	FALSE	0.350372	0	Inf	0.96342	1	FALSE	0	0	NA	NA	NA	NA	--	--	0
MD03G1110300	1.28769	0.434907	0.321859	0.58257	35.6754	62.398	-0.80657	0.15267	0.46808	FALSE	23.2204	70.0872	-1.5938	0.0051282	0.040387	DOWN	40.0441	64.9875	-0.69857	0.31933	0.69862	FALSE	sp|Q9M1E7|TET3_ARATH	Tetraspanin-3 OS=Arabidopsis thaliana GN=TET3 PE=1 SV=1	TET3
MD03G1110700	0.146813	0.69144	0.88058	2.26725	49.6273	5.92817	3.0655	0.11343	0.40228	FALSE	57.4566	6.66398	3.108	0.22307	0.51737	FALSE	135.607	6.18631	4.4542	0.00026572	0.0038761	UP	sp|Q9SY20|FB20_ARATH	F-box protein At1g30790 OS=Arabidopsis thaliana GN=At1g30790 PE=2 SV=2	At1g30790
MD03G1111400	5.46841	1.02916	1.59299	1.41532	135.515	525.967	-1.9565	0.0010541	0.021279	DOWN	223.816	590.513	-1.3997	0.00021247	0.0035364	DOWN	193.476	546.541	-1.4982	0.0010806	0.012087	DOWN	sp|Q42601|CARB_ARATH	Carbamoyl-phosphate synthase large chain, chloroplastic OS=Arabidopsis thaliana GN=CARB PE=1 SV=1	CARB
MD03G1111500	5.10514	0.902689	1.22876	1.75979	52.4866	209.769	-1.9988	0.00189	0.031939	DOWN	73.5362	235.469	-1.679	0.00039297	0.0057065	DOWN	105.752	217.86	-1.0427	0.023397	0.13137	FALSE	sp|Q42601|CARB_ARATH	Carbamoyl-phosphate synthase large chain, chloroplastic OS=Arabidopsis thaliana GN=CARB PE=1 SV=1	CARB
MD03G1111600	5.5626	5.45932	9.56813	24.3722	341.248	205.274	0.73327	0.44203	0.78633	FALSE	528.965	230.648	1.1975	0.15959	0.42307	FALSE	1316.84	214.199	2.6201	7.52e-09	4.37e-07	UP	sp|Q9SK08|LBD11_ARATH	LOB domain-containing protein 11 OS=Arabidopsis thaliana GN=LBD11 PE=2 SV=2	LBD11
MD03G1112500	39.5801	8.20757	7.18205	7.34048	279.535	937.746	-1.7462	0.0023364	0.036778	DOWN	252.169	1052.85	-2.0618	1.64e-08	1.25e-06	DOWN	247.03	975.466	-1.9814	8.47e-06	0.00020878	DOWN	--	--	0
MD03G1112700	20.4397	31.0101	29.9454	22.0626	6224.75	2611.43	1.2532	0.021868	0.15738	FALSE	5818.03	2932.62	0.98834	0.0036379	0.031437	UP	4140.46	2718.18	0.60715	0.14541	0.45482	FALSE	sp|Q680Q4|SIZ1_ARATH	E3 SUMO-protein ligase SIZ1 OS=Arabidopsis thaliana GN=SIZ1 PE=1 SV=2	SIZ1
MD03G1113000	35.0524	69.0171	64.6102	91.3936	3716.54	1188.63	1.6447	0.0075611	0.079791	FALSE	3380.8	1335.24	1.3403	0.0058264	0.044164	UP	4609.52	1237.9	1.8967	7.69e-06	0.0001922	UP	sp|Q8LAD0|PDX2_ARATH	Probable pyridoxal 5&apos;-phosphate synthase subunit PDX2 OS=Arabidopsis thaliana GN=PDX2 PE=1 SV=1	PDX2
MD09G1248800	3.4434	0.945527	1.20788	1.32292	91.4468	230.054	-1.331	0.030114	0.1914	FALSE	120.878	258.379	-1.0959	0.0068773	0.049756	DOWN	129.056	239.426	-0.89159	0.052197	0.23251	FALSE	sp|Q9SKU6|PP166_ARATH	Pentatricopeptide repeat-containing protein At2g20710, mitochondrial OS=Arabidopsis thaliana GN=At2g20710 PE=2 SV=1	At2g20710
MD09G1248900	4.36134	0.478838	0.706136	1.15992	44.5576	282.997	-2.667	1.75e-05	0.0010578	DOWN	67.3985	317.78	-2.2372	8.77e-08	5.31e-06	DOWN	110.813	294.176	-1.4085	0.0016832	0.017199	DOWN	sp|Q9SKU6|PP166_ARATH	Pentatricopeptide repeat-containing protein At2g20710, mitochondrial OS=Arabidopsis thaliana GN=At2g20710 PE=2 SV=1	At2g20710
MD03G1114300	0.992557	0.221983	0.153922	0.525036	33.9282	102.693	-1.5978	0.021297	0.15508	FALSE	23.3947	115.354	-2.3018	4.92e-05	0.001082	DOWN	75.9105	107.147	-0.49722	0.68545	0.9581	FALSE	sp|Q9SCV4|BGAL8_ARATH	Beta-galactosidase 8 OS=Arabidopsis thaliana GN=BGAL8 PE=2 SV=2	BGAL8
MD03G1114700	0.575556	0.0925067	0.0392602	0.0374473	3.57607	16.4519	-2.2018	0.1056	0.38687	FALSE	1.84692	18.4813	-3.3229	0.004548	0.0369	DOWN	1.45951	17.1343	-3.5533	0.012885	0.08479	FALSE	sp|Q8LEE9|FLA12_ARATH	Fasciclin-like arabinogalactan protein 12 OS=Arabidopsis thaliana GN=FLA12 PE=2 SV=2	FLA12
MD03G1114800	18.9638	2.21791	3.59467	9.7369	181.138	977.727	-2.4323	9.36e-06	0.00066941	DOWN	275.69	1097.65	-1.9933	8.2e-08	5.04e-06	DOWN	720.598	1015.58	-0.49504	0.27464	0.647	FALSE	sp|Q944L3|IDD9_ARATH	Protein indeterminate-domain 9 OS=Arabidopsis thaliana GN=IDD9 PE=2 SV=1	IDD9
MD03G1115500	0.589098	7.03177	11.2799	16.1279	921.575	47.6912	4.2723	4.73e-09	1.97e-06	UP	1421.54	53.5657	4.73	9.09e-07	3.94e-05	UP	1986.26	49.7389	5.3195	9.8e-05	0.0016827	UP	sp|Q94KB7|MLO6_ARATH	MLO-like protein 6 OS=Arabidopsis thaliana GN=MLO6 PE=2 SV=2	MLO6
MD03G1115800	0.144424	0.575319	1.08755	3.47096	71.8114	10.1822	2.8182	0.13625	0.44269	FALSE	125.593	11.4315	3.4577	0.21609	0.50763	FALSE	368.341	10.5664	5.1235	9.19e-07	3.04e-05	UP	sp|Q94KB9|MLO3_ARATH	MLO-like protein 3 OS=Arabidopsis thaliana GN=MLO3 PE=2 SV=1	MLO3
MD03G1116100	18.8153	30.4175	40.3818	22.3693	2769.34	1160.93	1.2543	0.012296	0.10984	FALSE	3750.73	1303.89	1.5244	6.84e-06	0.00021161	UP	2003.11	1210.07	0.72715	0.061135	0.25884	FALSE	sp|Q9FS87|IVD_SOLTU	Isovaleryl-CoA dehydrogenase, mitochondrial OS=Solanum tuberosum GN=IVD PE=1 SV=2	IVD
MD03G1116400	1.26285	18.319	8.52407	4.98849	2098.36	83.0399	4.6593	0.036635	0.21539	FALSE	858.728	93.3217	3.2019	9.39e-09	7.64e-07	UP	481.159	86.8965	2.4691	1.92e-07	7.65e-06	UP	sp|Q9S752|LOFG2_ARATH	Probable E3 ubiquitin-protein ligase LOG2 OS=Arabidopsis thaliana GN=LOG2 PE=1 SV=1	LOG2
MD13G1056700	15.3928	38.2291	25.7921	16.7495	3299.62	818.796	2.0107	0.001095	0.021834	UP	2111.41	919.271	1.1996	0.0085902	0.058291	FALSE	1315.74	850.91	0.6288	0.18685	0.52574	FALSE	sp|Q9JHB5|TSNAX_RAT	Translin-associated protein X OS=Rattus norvegicus GN=Tsnax PE=1 SV=1	Tsnax
MD16G1167600	12.0038	25.3953	22.5805	13.6444	1165.52	345.463	1.7544	0.0020091	0.033163	UP	986.583	387.833	1.347	0.0001506	0.0026925	UP	574.152	358.983	0.67752	0.1564	0.47504	FALSE	sp|Q9ZSW9|TCTP_HEVBR	Translationally-controlled tumor protein homolog OS=Hevea brasiliensis GN=TCTP PE=2 SV=1	TCTP
MD17G1265400	8.31474	1.46987	2.34468	2.83492	117.592	477.737	-2.0224	0.0007635	0.016893	DOWN	202.988	536.412	-1.4019	0.00014851	0.0026692	DOWN	238.567	496.653	-1.0578	0.012267	0.081592	FALSE	sp|Q9SFT7|PBL26_ARATH	Probable serine/threonine-protein kinase PBL26 OS=Arabidopsis thaliana GN=PBL26 PE=2 SV=1	PBL26
MD03G1119300	414.794	42.2817	68.4038	288.498	957.945	5877.73	-2.6172	1.19e-06	0.00014122	DOWN	1462.69	6600.76	-2.174	9.01e-11	1.33e-08	DOWN	6079.89	6122.64	-0.010108	0.83354	1	FALSE	sp|Q9FGZ9|UBL5_ARATH	Ubiquitin-like protein 5 OS=Arabidopsis thaliana GN=UBL5 PE=3 SV=1	UBL5
MD03G1120600	0.473874	0.20288	0.307747	1.67853	25.9828	41.1911	-0.66477	0.4396	0.78432	FALSE	40.6471	46.286	-0.18742	0.69758	0.93776	FALSE	213.16	43.0186	2.3089	1.03e-05	0.00024839	UP	sp|A0A072VMJ3|CN15C_MEDTR	Protein CNGC15c OS=Medicago truncatula GN=CNGC15C PE=1 SV=1	CNGC15C
MD03G1120800	3.24654	0.444244	1.53453	2.21152	14.6674	76.6526	-2.3857	0.0029325	0.042684	DOWN	52.6532	86.0926	-0.70937	0.2912	0.60355	FALSE	75.3236	79.6449	-0.08048	0.95151	1	FALSE	--	--	0
MD03G1120900	3.18636	0.310038	0.505761	0.422754	33.2466	264.321	-2.991	4.13e-06	0.00036763	DOWN	58.7108	296.827	-2.3379	1.31e-07	7.48e-06	DOWN	48.6946	275.3	-2.4992	1.77e-06	5.33e-05	DOWN	sp|Q8VYY5|NCRK_ARATH	Receptor-like serine/threonine-protein kinase NCRK OS=Arabidopsis thaliana GN=NCRK PE=1 SV=1	NCRK
MD03G1121900	0	0	0.015604	0.1711	0	0	NA	NA	NA	NA	0.983562	0	Inf	0.76681	0.97188	FALSE	9.49345	0	Inf	0.0047472	0.039249	UP	sp|Q8L817|ATCA7_ARATH	Alpha carbonic anhydrase 7 OS=Arabidopsis thaliana GN=ACA7 PE=2 SV=1	ACA7
MD03G1124000	91.862	17.8303	31.1426	35.2563	2020.05	7180.86	-1.8298	0.00067269	0.015491	DOWN	3583.5	8061.85	-1.1697	0.00087667	0.010667	DOWN	3979.09	7458.88	-0.90652	0.027174	0.1465	FALSE	sp|P08926|RUBA_PEA	RuBisCO large subunit-binding protein subunit alpha, chloroplastic OS=Pisum sativum PE=1 SV=2	1
MD03G1125200	31.7464	7.10033	10.4309	6.30947	631.528	2006.28	-1.6676	0.0032476	0.045624	DOWN	961.444	2253.15	-1.2287	0.00061163	0.0080294	DOWN	559.563	2088.82	-1.9003	1.85e-05	0.00040991	DOWN	sp|P54774|CDC48_SOYBN	Cell division cycle protein 48 homolog OS=Glycine max GN=CDC48 PE=2 SV=1	CDC48
MD03G1126900	3.17535	0.236654	0.707889	3.36991	17.0709	161.378	-3.2408	0.00047009	0.011989	DOWN	52.5078	181.185	-1.7869	0.018162	0.099829	FALSE	240.392	167.39	0.52217	0.56418	0.89516	FALSE	--	--	0
MD03G1127700	7.31043	1.52516	3.77623	6.70959	240.878	799.962	-1.7316	0.0031049	0.044263	DOWN	616.906	898.37	-0.54226	0.10549	0.32616	FALSE	1058.19	832.249	0.34651	0.33371	0.7137	FALSE	--	--	0
MD03G1128200	0.00610637	0.00766996	0.242179	1.03706	0.408076	0.257096	0.66653	1	1	FALSE	14.6716	0.289081	5.6654	0.0019459	0.01967	UP	64.4463	0.27088	7.8943	1.28e-12	1.91e-10	UP	sp|Q9C8N5|STOP1_ARATH	Protein SENSITIVE TO PROTON RHIZOTOXICITY 1 OS=Arabidopsis thaliana GN=STOP1 PE=2 SV=1	STOP1
MD03G1128800	5.24465	18.896	8.55689	11.1665	1045.33	179.978	2.5381	1.08e-05	0.0007413	UP	449.704	202.153	1.1535	0.0046362	0.037467	UP	589.344	187.484	1.6523	0.17196	0.5016	FALSE	sp|Q681X4|ZAT5_ARATH	Zinc finger protein ZAT5 OS=Arabidopsis thaliana GN=ZAT5 PE=2 SV=1	ZAT5
MD03G1129300	8.30739	21.3426	18.643	12.4852	536.028	129.805	2.046	0.0004558	0.011735	UP	441.135	145.758	1.5976	0.00076423	0.0095996	UP	285.454	135.06	1.0797	0.079386	0.30842	FALSE	--	--	0
MD03G1130100	0.0239963	0.00463387	0.140532	1.49386	0.375871	1.22811	-1.7081	0.8997	1	FALSE	11.8703	1.38097	3.1036	0.35247	0.67201	FALSE	111.442	1.28017	6.4438	8.05e-05	0.0014219	UP	sp|Q7TMR0|PCP_MOUSE	Lysosomal Pro-X carboxypeptidase OS=Mus musculus GN=Prcp PE=1 SV=2	Prcp
MD03G1130200	26.5708	38.8408	45.0325	35.4403	2361.5	1035.1	1.1899	0.026986	0.17866	FALSE	2656.12	1162.54	1.192	0.00044642	0.0062873	UP	2017.2	1077.32	0.90491	0.025643	0.14073	FALSE	sp|A6U864|RL22_SINMW	50S ribosomal protein L22 OS=Sinorhizobium medicae (strain WSM419) GN=rplV PE=3 SV=1	rplV
MD07G1119500	93.0571	132.97	142.022	161.883	19527.8	8541.67	1.1929	0.027964	0.18279	FALSE	19715.1	9593.21	1.0392	0.0021217	0.02092	UP	21995.1	8892.84	1.3065	0.0017406	0.017671	UP	sp|Q8RWV0|TKTC1_ARATH	Transketolase-1, chloroplastic OS=Arabidopsis thaliana GN=TKL-1 PE=1 SV=1	TKL-1
MD03G1131700	75.0295	28.4474	36.1366	17.051	1087.92	2110.79	-0.9562	0.24257	0.58991	FALSE	1507.31	2370.94	-0.65348	0.08325	0.27985	FALSE	673.301	2201.72	-1.7093	0.0019537	0.01938	DOWN	--	--	0
MD03G1132100	17.261	4.08278	5.54078	1.01936	109.438	342.505	-1.646	0.030578	0.19309	FALSE	159.727	384.745	-1.2683	0.021901	0.11415	FALSE	28.0205	357.44	-3.6731	1.1e-06	3.55e-05	DOWN	--	--	0
MD03G1132200	11.7789	3.03931	3.769	1.08285	116.926	317.841	-1.4427	0.010976	0.10217	FALSE	149.482	356.945	-1.2557	0.001938	0.01962	DOWN	40.7854	331.159	-3.0214	4.88e-09	3.05e-07	DOWN	--	--	0
MD02G1090400	9.4083	1.38831	2.45563	1.4829	129.145	638.371	-2.3054	9.68e-05	0.0037236	DOWN	244.188	716.998	-1.554	3.2e-05	0.00075718	DOWN	143.34	664.808	-2.2135	1.29e-06	4.09e-05	DOWN	sp|Q8BLA8|TRPA1_MOUSE	Transient receptor potential cation channel subfamily A member 1 OS=Mus musculus GN=Trpa1 PE=1 SV=1	Trpa1
MD03G1133900	0.741979	0.033701	0.187354	0.13465	4.42399	64.6574	-3.8694	2.26e-05	0.0012785	DOWN	25.3333	72.6434	-1.5198	0.04842	0.19578	FALSE	16.2629	67.4907	-2.0531	0.0045668	0.038172	DOWN	--	--	0
MD03G1134500	200.699	429.055	568.974	307.364	48609.8	15749.3	1.626	0.022561	0.15992	FALSE	66540.7	17688.1	1.9115	7.72e-09	6.58e-07	UP	35493.5	16409.7	1.113	0.0064659	0.050131	FALSE	sp|Q0ZIV6|YCF2_VITVI	Protein Ycf2 OS=Vitis vinifera GN=ycf2-A PE=3 SV=1	ycf2-A
MD03G1134800	25.8174	17.6876	61.5156	154.22	1178.5	1123.89	0.068456	0.78638	0.98568	FALSE	4264.43	1262.73	1.7558	0.31979	0.6375	FALSE	9998.2	1171.72	3.093	2.27e-07	8.89e-06	UP	sp|Q9SGD6|AROD6_ARATH	Arogenate dehydratase/prephenate dehydratase 6, chloroplastic OS=Arabidopsis thaliana GN=ADT6 PE=1 SV=1	ADT6
MD03G1135000	0.37915	0.564545	0.675943	1.60257	16.7841	7.90107	1.087	0.24384	0.59145	FALSE	21.928	8.87119	1.3056	0.15974	0.42323	FALSE	49.3885	8.2364	2.5841	0.00074849	0.0090153	UP	sp|Q4PSU4|AGL61_ARATH	Agamous-like MADS-box protein AGL61 OS=Arabidopsis thaliana GN=AGL61 PE=1 SV=1	AGL61
MD01G1236400	7.813	2.69353	3.44827	2.49345	327.251	695.17	-1.087	0.1291	0.43017	FALSE	455.956	780.531	-0.77556	0.052615	0.2073	FALSE	322.489	722.042	-1.1628	0.0059969	0.047225	DOWN	sp|Q12788|TBL3_HUMAN	Transducin beta-like protein 3 OS=Homo sapiens GN=TBL3 PE=1 SV=2	TBL3
MD03G1136300	14.6004	5.29194	5.28436	1.49839	201.2	414.43	-1.0425	0.20446	0.54331	FALSE	216.534	465.379	-1.1038	0.012919	0.078683	FALSE	59.1051	431.662	-2.8685	8.76e-09	5.01e-07	DOWN	--	--	0
MD03G1137700	47.0004	91.6381	85.1609	52.4357	11445.9	3680.08	1.637	0.0029836	0.043226	UP	10173.2	4132.13	1.2998	0.0001863	0.0031921	UP	5957	3827.65	0.63813	0.13259	0.43005	FALSE	sp|Q6P7H4|NIPA_XENLA	NIPA-like protein OS=Xenopus laevis GN=zc3hc1 PE=2 SV=1	zc3hc1
MD03G1138500	77.2037	16.8949	24.5587	4.87363	2745.46	9280.03	-1.7571	0.0044156	0.056538	FALSE	4201.12	10417.9	-1.3102	0.015412	0.089256	FALSE	810.41	9637.58	-3.5719	1.45e-11	1.75e-09	DOWN	sp|Q9FL28|FLS2_ARATH	LRR receptor-like serine/threonine-protein kinase FLS2 OS=Arabidopsis thaliana GN=FLS2 PE=1 SV=1	FLS2
MD03G1139600	15.7167	70.2694	53.8748	27.7188	3305.72	460.71	2.843	2.94e-05	0.0015638	UP	2458.05	517.357	2.2483	0.01062	0.068129	FALSE	1205.59	479.511	1.3301	0.066649	0.27434	FALSE	sp|Q67JV2|RS17_SYMTH	30S ribosomal protein S17 OS=Symbiobacterium thermophilum (strain T / IAM 14863) GN=rpsQ PE=3 SV=1	rpsQ
MD03G1139700	0.375501	2.29689	1.73385	1.67398	101.993	9.92916	3.3607	0.0050663	0.061875	FALSE	71.2998	11.1516	2.6766	0.0015948	0.017009	UP	67.2518	10.3663	2.6977	0.021588	0.12416	FALSE	--	--	0
MD03G1140300	7.39552	26.3523	114.871	379.238	2033.1	355.81	2.5145	0.1926	0.5282	FALSE	8816.58	399.983	4.4622	0.067395	0.24336	FALSE	26524.1	371.837	6.1565	2.04e-11	2.35e-09	UP	sp|Q9ZSA7|DLO2_ARATH	Protein DMR6-LIKE OXYGENASE 2 OS=Arabidopsis thaliana GN=DLO2 PE=2 SV=1	DLO2
MD03G1140400	0.286954	0.35043	3.84994	30.7231	21.3907	11.7691	0.86198	0.29005	0.64565	FALSE	241.972	13.2228	4.1937	0.013839	0.08276	FALSE	1819.49	12.2543	7.2141	4.76e-07	1.7e-05	UP	sp|Q9ZSA7|DLO2_ARATH	Protein DMR6-LIKE OXYGENASE 2 OS=Arabidopsis thaliana GN=DLO2 PE=2 SV=1	DLO2
MD03G1142300	29.0921	71.4038	49.7358	47.1147	4585.7	1157.33	1.9863	0.00039505	0.010616	UP	3045.12	1299.83	1.2282	0.0044246	0.036318	UP	2774.61	1204.96	1.2033	0.043887	0.20679	FALSE	sp|Q9ZNU9|SAP3_ARATH	Zinc finger A20 and AN1 domain-containing stress-associated protein 3 OS=Arabidopsis thaliana GN=SAP3 PE=2 SV=1	SAP3
MD07G1309100	13.905	5.22856	5.11547	6.04156	787.291	1380.45	-0.81017	0.1189	0.41162	FALSE	760.166	1550.43	-1.0283	0.0029632	0.026908	DOWN	874.348	1435.61	-0.71539	0.079127	0.30796	FALSE	sp|Q12788|TBL3_HUMAN	Transducin beta-like protein 3 OS=Homo sapiens GN=TBL3 PE=1 SV=2	TBL3
MD03G1142500	0.401	0.290357	0.861606	1.76672	47.8185	38.48	0.31346	0.8168	0.99804	FALSE	135.502	43.2157	1.6487	0.53745	0.83264	FALSE	253.895	40.0499	2.6644	0.0015452	0.016077	UP	sp|Q9SWB4|PARP3_SOYBN	Poly [ADP-ribose] polymerase 3 OS=Glycine max GN=PARP3 PE=2 SV=1	PARP3
MD03G1142800	12.1527	2.37917	3.81019	3.28189	108.588	387.223	-1.8343	0.0022477	0.035906	DOWN	180.97	434.848	-1.2648	0.00071208	0.0090705	DOWN	147.658	402.681	-1.4474	0.0025743	0.024174	DOWN	sp|Q9SGD1|ZWIP3_ARATH	Zinc finger protein WIP3 OS=Arabidopsis thaliana GN=WIP3 PE=2 SV=1	WIP3
MD03G1144400	40.6166	65.8788	70.3808	95.1048	5504.14	2175.57	1.3391	0.01084	0.10133	FALSE	5738.78	2443.29	1.2319	0.00027342	0.0042932	UP	7637.2	2264.15	1.7541	0.0065237	0.050484	FALSE	sp|Q9ZQG9|E1314_ARATH	Glucan endo-1,3-beta-glucosidase 14 OS=Arabidopsis thaliana GN=At2g27500 PE=1 SV=2	At2g27500
MD03G1146100	14.6774	22.7755	22.7914	19.1127	2335.74	944.551	1.3062	0.017901	0.13868	FALSE	2229.3	1060.79	1.0714	0.0021029	0.020792	UP	1806.17	983.011	0.87766	0.035068	0.17621	FALSE	--	--	0
MD03G1146300	44.7901	1.19259	1.00802	2.8157	120.993	3303.32	-4.7709	2.04e-08	6.11e-06	DOWN	107.508	3709.58	-5.1087	2.31e-09	2.28e-07	DOWN	294.153	3430.66	-3.5438	4.85e-06	0.0001283	DOWN	sp|Q6AWW5|Y5262_ARATH	Ankyrin repeat-containing protein At5g02620 OS=Arabidopsis thaliana GN=At5g02620 PE=1 SV=1	At5g02620
MD03G1147000	2.03519	0.545645	0.501108	0.782853	28.835	67.7285	-1.2319	0.076659	0.32592	FALSE	24.1206	76.0302	-1.6563	0.0044969	0.036638	DOWN	39.4994	70.3012	-0.83172	0.094036	0.34569	FALSE	--	--	0
MD03G1147100	5.73452	0.19247	0.134603	0.0760279	20.7613	384.328	-4.2104	0.009711	0.094501	FALSE	12.7367	431.822	-5.0834	0.003893	0.033066	DOWN	7.36277	399.415	-5.7615	0.0017447	0.0177	DOWN	sp|Q9C7A2|ITN1_ARATH	Ankyrin repeat-containing protein ITN1 OS=Arabidopsis thaliana GN=ITN1 PE=1 SV=1	ITN1
MD03G1148700	14.1682	2.7	5.34874	5.31987	197.738	716.78	-1.8579	0.0010645	0.021456	DOWN	396.336	804.988	-1.0222	0.005286	0.041293	DOWN	381.774	745.677	-0.96583	0.038039	0.18686	FALSE	sp|Q9SEA0|CCS_CITSI	Capsanthin/capsorubin synthase, chromoplastic OS=Citrus sinensis GN=CCS PE=3 SV=1	CCS
MD03G1149600	18.7679	5.56543	6.25373	13.4345	546.925	1202.91	-1.1371	0.027562	0.18129	FALSE	598.741	1350.98	-1.174	0.00057222	0.0075871	DOWN	1256.16	1253.06	0.0035654	0.98701	1	FALSE	sp|Q9SJF3|DCP1_ARATH	mRNA-decapping enzyme-like protein OS=Arabidopsis thaliana GN=At1g08370 PE=1 SV=2	At1g08370
MD03G1149700	16.5339	23.201	25.2261	18.8713	1196.51	551.159	1.1183	0.033286	0.2032	FALSE	1264.87	619.065	1.0308	0.0025919	0.024349	UP	923.178	574.182	0.6851	0.10424	0.36973	FALSE	sp|Q28IQ9|CIRBP_XENTR	Cold-inducible RNA-binding protein OS=Xenopus tropicalis GN=cirbp PE=2 SV=1	cirbp
MD03G1150200	10.2103	12.6026	29.2017	23.6933	612.727	346.019	0.82439	0.28545	0.64067	FALSE	1503.89	388.695	1.952	3.63e-08	2.48e-06	UP	1191.65	360.5	1.7249	6.87e-05	0.0012432	UP	sp|Q9XIN8|FB119_ARATH	F-box protein At2g27310 OS=Arabidopsis thaliana GN=At2g27310 PE=2 SV=1	At2g27310
MD03G1150500	7.69665	5.79246	5.02873	1.39224	229.116	215.906	0.085675	0.7438	0.96817	FALSE	213.362	242.33	-0.18367	0.89458	1	FALSE	56.5103	224.164	-1.988	0.00069702	0.0084972	DOWN	sp|Q949Q5|PSAO_ARATH	Photosystem I subunit O OS=Arabidopsis thaliana GN=PSAO PE=1 SV=1	PSAO
MD03G1150600	5.12413	0.766239	0.597753	1.37932	60.7857	259.156	-2.092	0.0086013	0.086864	FALSE	43.0643	291.092	-2.7569	0.0026122	0.024512	DOWN	100.171	270.59	-1.4336	0.069163	0.28155	FALSE	sp|Q66GQ2|Y5162_ARATH	Uncharacterized protein At5g41620 OS=Arabidopsis thaliana GN=At5g41620 PE=2 SV=2	At5g41620
MD05G1201300	0	0.120809	0.983473	2.44317	4.1443	0	Inf	0.10251	0.38015	FALSE	33.4246	0	Inf	0.048992	0.19743	FALSE	75.0488	0	Inf	9.66e-14	1.92e-11	UP	sp|Q9SR34|TAC1_ARATH	Transcriptional regulator TAC1 OS=Arabidopsis thaliana GN=TAC1 PE=2 SV=1	TAC1
MD03G1156200	0.550884	0.29791	0.0340506	0.0289357	43.1798	43.0537	0.0042206	0.79865	0.99266	FALSE	3.99156	48.3363	-3.5981	7.84e-06	0.00023761	DOWN	3.22721	44.7771	-3.7944	3.36e-05	0.00067739	DOWN	sp|Q0V865|FAFL_ARATH	Protein FAF-like, chloroplastic OS=Arabidopsis thaliana GN=At5g22090 PE=2 SV=1	At5g22090
MD15G1103400	75.6783	34.9912	44.166	17.0916	2296.55	3500.52	-0.6081	0.31535	0.67119	FALSE	3073.69	3931.04	-0.35494	0.52331	0.82122	FALSE	1138.1	3646.36	-1.6798	6.02e-05	0.0011108	DOWN	sp|Q9FUY2|LEUNG_ARATH	Transcriptional corepressor LEUNIG OS=Arabidopsis thaliana GN=LUG PE=1 SV=2	LUG
MD03G1160300	26.4074	59.6548	67.3407	96.0818	1423.15	373.824	1.9287	0.11282	0.40115	FALSE	1441.39	420.005	1.779	0.057759	0.22031	FALSE	2045.32	390.274	2.3898	0.00059094	0.0074127	UP	--	--	0
MD03G1161400	16.776	19.4684	24.7302	15.7508	2543.71	1442.83	0.81803	0.10611	0.38801	FALSE	3206.22	1620.41	0.98452	0.0031323	0.028129	UP	1964.19	1502.87	0.38621	0.30292	0.6802	FALSE	sp|Q39238|TSL_ARATH	Serine/threonine-protein kinase TOUSLED OS=Arabidopsis thaliana GN=TOUSLED PE=1 SV=1	TOUSLED
MD03G1163600	51.3128	102.521	71.7121	51.498	11740.7	3631.61	1.6928	0.0026961	0.040596	UP	7613.57	4078.87	0.9004	0.0053621	0.041656	UP	5293.55	3781.94	0.48511	0.20136	0.54722	FALSE	sp|Q2V452|CIPK3_ARATH	CBL-interacting serine/threonine-protein kinase 3 OS=Arabidopsis thaliana GN=CIPK3 PE=1 SV=2	CIPK3
MD03G1165200	18.8197	33.2855	27.7431	31.5183	3794.55	1297.62	1.5481	0.048043	0.25278	FALSE	2934.01	1457.25	1.0096	0.0041707	0.034724	UP	3200.7	1351.09	1.2443	0.0027698	0.025731	UP	sp|Q8RWL5|CLT3_ARATH	Protein CLT3, chloroplastic OS=Arabidopsis thaliana GN=CLT3 PE=2 SV=1	CLT3
MD03G1166800	0.427835	0.587496	1.34015	4.34202	23.567	11.8207	0.99545	0.26175	0.61387	FALSE	53.9517	13.2886	2.0215	0.0057109	0.043511	UP	165.839	12.389	3.7426	0.058224	0.25076	FALSE	--	--	0
MD03G1166900	1.2359	1.59255	4.71766	15.7046	130.931	73.4281	0.83441	0.43138	0.77692	FALSE	414.12	82.532	2.327	0.00013336	0.0024443	UP	1308.33	76.8828	4.0889	0.0089668	0.064373	FALSE	sp|Q94CK9|LRP1_ARATH	Protein LATERAL ROOT PRIMORDIUM 1 OS=Arabidopsis thaliana GN=LRP1 PE=1 SV=1	LRP1
MD03G1167000	12.0047	10.6016	17.3535	11.5425	459.389	360.771	0.34863	0.45874	0.7988	FALSE	783.278	405.206	0.95087	0.0065265	0.047865	UP	501.729	375.885	0.41661	0.27973	0.65351	FALSE	sp|Q9HFE7|YNW5_SCHPO	Ankyrin repeat-containing protein P16F5.05c OS=Schizosaccharomyces pombe (strain 972 / ATCC 24843) GN=SPBP16F5.05c PE=4 SV=1	SPBP16F5.05c
MD15G1117000	0.468523	1.47784	3.07399	5.1427	113.272	24.8845	2.1865	0.055743	0.27281	FALSE	247.45	27.9733	3.145	9.85e-05	0.0019016	UP	393.872	26.0143	3.9203	5.22e-14	1.11e-11	UP	sp|Q9FUY2|LEUNG_ARATH	Transcriptional corepressor LEUNIG OS=Arabidopsis thaliana GN=LUG PE=1 SV=2	LUG
MD03G1169200	18.1243	3.4763	4.55378	5.7463	247.345	817.678	-1.725	0.0012989	0.024665	DOWN	302.677	918.086	-1.6009	9.38e-06	0.00027453	DOWN	378.422	849.639	-1.1669	0.0049051	0.040247	DOWN	sp|O80934|Y2766_ARATH	Uncharacterized protein At2g37660, chloroplastic OS=Arabidopsis thaliana GN=At2g37660 PE=1 SV=2	At2g37660
MD03G1169300	6.61952	1.20038	2.11965	3.29519	96.2905	350.816	-1.8652	0.0013323	0.025159	DOWN	167.074	394.002	-1.2377	0.0010991	0.012764	DOWN	256.04	365.282	-0.51264	0.22226	0.57852	FALSE	sp|Q9LPR8|SCL3_ARATH	Scarecrow-like protein 3 OS=Arabidopsis thaliana GN=SCL3 PE=2 SV=1	SCL3
MD03G1170900	6.42007	13.4715	12.8574	7.5877	1389.8	425.687	1.707	0.0019653	0.03271	UP	1285.53	477.984	1.4273	3.43e-05	0.00079819	UP	735.208	443.036	0.73073	0.082748	0.31707	FALSE	sp|O74777|KRR1_SCHPO	KRR1 small subunit processome component homolog OS=Schizosaccharomyces pombe (strain 972 / ATCC 24843) GN=mis3 PE=3 SV=1	mis3
MD03G1171300	17.1487	10.4191	10.0032	5.15538	1547.06	1738.82	-0.16858	0.76413	0.97748	FALSE	1523.83	1952.88	-0.35791	0.31313	0.62985	FALSE	750.84	1810.96	-1.2702	0.002932	0.026993	DOWN	sp|Q99615|DNJC7_HUMAN	DnaJ homolog subfamily C member 7 OS=Homo sapiens GN=DNAJC7 PE=1 SV=2	DNAJC7
MD03G1171700	7.99546	1.47051	2.30509	2.61512	193.581	727.619	-1.9102	0.00074219	0.016592	DOWN	307.516	817.173	-1.41	0.00011793	0.0022066	DOWN	337.136	757.353	-1.1676	0.01125	0.07634	FALSE	sp|Q94CJ8|C3H55_ARATH	Zinc finger CCCH domain-containing protein 55 OS=Arabidopsis thaliana GN=At5g12440 PE=2 SV=3	At5g12440
MD03G1171800	6.05904	0.76286	1.07554	1.491	87.2716	492.724	-2.4972	4.09e-05	0.0019838	DOWN	125.708	553.073	-2.1374	0.0002417	0.0039158	DOWN	166.86	512.009	-1.6175	0.050084	0.22619	FALSE	sp|Q0D3J9|C3H53_ORYSJ	Zinc finger CCCH domain-containing protein 53 OS=Oryza sativa subsp. japonica GN=Os07g0682400 PE=2 SV=1	Os07g0682400
MD03G1173800	30.9204	32.6147	50.2277	45.7547	4127.1	2603.19	0.66485	0.16149	0.48238	FALSE	6324.58	2923.83	1.1131	0.00072126	0.0091761	UP	5562.93	2711.46	1.0368	0.0067286	0.051689	FALSE	sp|O82802|SIR1_TOBAC	Sulfite reductase 1 [ferredoxin], chloroplastic OS=Nicotiana tabacum GN=SIR1 PE=1 SV=1	SIR1
MD03G1174700	34.9652	6.30455	9.93309	9.46644	123.027	488.207	-1.9885	0.0027238	0.040751	DOWN	201.947	547.988	-1.4402	0.0095414	0.062882	FALSE	194.197	506.59	-1.3833	0.0084143	0.061425	FALSE	sp|F4IWB3|SMR13_ARATH	Cyclin-dependent protein kinase inhibitor SMR13 OS=Arabidopsis thaliana GN=SMR13 PE=4 SV=1	SMR13
MD03G1175000	1.4834	1.90514	12.0198	29.5685	146.811	70.9554	1.049	0.40026	0.75128	FALSE	943.746	79.7417	3.565	0.25265	0.55701	FALSE	2107.24	74.0457	4.8308	2.23e-13	4.14e-11	UP	sp|Q8L9X2|RBCX2_ARATH	Chaperonin-like RbcX protein 2, chloroplastic OS=Arabidopsis thaliana GN=RBCX2 PE=1 SV=1	RBCX2
MD03G1177200	0.507761	0.83471	1.11939	1.05383	198.787	70.558	1.4943	0.32325	0.67842	FALSE	239.597	79.2655	1.5958	0.018372	0.10056	FALSE	215.232	73.5711	1.5487	0.0014131	0.014925	UP	sp|Q8GUQ8|XDH1_ARATH	Xanthine dehydrogenase 1 OS=Arabidopsis thaliana GN=XDH1 PE=1 SV=1	XDH1
MD03G1178200	8.9554	2.72241	2.21913	1.51066	137.758	307.963	-1.1606	0.034575	0.20792	FALSE	112.128	345.938	-1.6254	5.04e-05	0.0011038	DOWN	73.2151	321.048	-2.1326	1.89e-05	0.0004171	DOWN	sp|Q8L649|BB_ARATH	E3 ubiquitin ligase BIG BROTHER OS=Arabidopsis thaliana GN=BB PE=1 SV=1	BB
MD03G1178500	0	0.00995911	0.0141827	0	0.944538	0	Inf	0.7464	0.96846	FALSE	1.07232	0	Inf	0.649	0.90806	FALSE	0	0	NA	NA	NA	NA	sp|P25083|ADT1_SOLTU	ADP,ATP carrier protein, mitochondrial OS=Solanum tuberosum GN=ANT PE=2 SV=1	ANT
MD03G1179100	9.18354	1.94286	3.22375	3.14691	72.2558	231.848	-1.682	0.0053554	0.064307	FALSE	118.803	260.385	-1.1321	0.0066551	0.048524	DOWN	114.581	241.245	-1.0741	0.025769	0.14118	FALSE	sp|Q9FM67|TI205_ARATH	Protein TIC 20-v, chloroplastic OS=Arabidopsis thaliana GN=TIC20-V PE=2 SV=1	TIC20-V
MD03G1179200	56.4667	14.2929	11.0867	11.2991	1011.78	2524.99	-1.3194	0.011907	0.1077	FALSE	744.322	2834.61	-1.9292	0.003192	0.028565	DOWN	715.924	2627.84	-1.876	0.0047803	0.039473	DOWN	sp|Q9FM65|FLA1_ARATH	Fasciclin-like arabinogalactan protein 1 OS=Arabidopsis thaliana GN=FLA1 PE=1 SV=1	FLA1
MD03G1182500	8.06123	5.65204	5.59912	1.97475	142.877	140.986	0.019219	0.81632	0.99804	FALSE	143.491	158.285	-0.14156	0.87233	1	FALSE	50.1971	146.465	-1.5449	0.0029375	0.027026	DOWN	sp|O80831|BAM7_ARATH	Beta-amylase 7 OS=Arabidopsis thaliana GN=BAM7 PE=2 SV=2	BAM7
MD12G1017600	2.40405	0.986543	2.4566	4.47501	307.693	517.075	-0.74888	0.21051	0.55073	FALSE	777.587	580.694	0.42123	0.27783	0.58782	FALSE	1393.21	537.642	1.3737	0.00080902	0.0095813	UP	sp|Q8LK56|DME_ARATH	Transcriptional activator DEMETER OS=Arabidopsis thaliana GN=DME PE=1 SV=2	DME
MD03G1183700	3.05505	0.290037	0.561902	0.835208	20.6787	151.25	-2.8707	2.59e-05	0.0014232	DOWN	40.5002	169.836	-2.0681	2.97e-05	0.00071129	DOWN	59.1251	157.53	-1.4138	0.0077859	0.057782	FALSE	sp|Q8LBL1|KCO1_ARATH	Two-pore potassium channel 1 OS=Arabidopsis thaliana GN=TPK1 PE=1 SV=2	TPK1
MD03G1183800	9.48331	2.03845	3.16043	4.64302	230.781	749.955	-1.7003	0.0028568	0.042032	DOWN	366.006	842.14	-1.2022	0.0010459	0.012242	DOWN	535.841	780.459	-0.54252	0.18621	0.52496	FALSE	sp|Q8LBL1|KCO1_ARATH	Two-pore potassium channel 1 OS=Arabidopsis thaliana GN=TPK1 PE=1 SV=2	TPK1
MD03G1184200	20.7103	26.4216	33.3471	27.7065	2252.51	1152.05	0.96733	0.06371	0.29365	FALSE	2822.08	1293.58	1.1254	0.0010059	0.011854	UP	2287.06	1198.02	0.93284	0.04017	0.19443	FALSE	sp|P87131|CYSKL_SCHPO	Cysteine synthase 2 OS=Schizosaccharomyces pombe (strain 972 / ATCC 24843) GN=cys12 PE=3 SV=1	cys12
MD03G1185300	2.91129	0.83127	1.43822	5.09388	103.201	225.527	-1.1278	0.054867	0.27003	FALSE	167.959	253.378	-0.59318	0.14711	0.40262	FALSE	582.021	234.933	1.3088	0.0028438	0.026299	UP	sp|O81833|SD11_ARATH	G-type lectin S-receptor-like serine/threonine-protein kinase SD1-1 OS=Arabidopsis thaliana GN=SD11 PE=1 SV=1	SD11
MD03G1186700	6.13782	0.940597	2.13729	3.10156	147.27	659.694	-2.1633	0.00020735	0.0066072	DOWN	334.172	740.944	-1.1488	0.0019606	0.019787	DOWN	482.353	686.876	-0.50996	0.25133	0.61644	FALSE	sp|Q9FZD9|DUF3_ARATH	DUF724 domain-containing protein 3 OS=Arabidopsis thaliana GN=DUF3 PE=1 SV=1	DUF3
MD03G1187400	15.8032	17.2801	15.6513	25.6409	2561.24	1461.78	0.80912	0.1275	0.42722	FALSE	2240.61	1642.45	0.44805	0.48157	0.78818	FALSE	3516.96	1523.49	1.207	0.0040853	0.034979	UP	sp|O81905|SD18_ARATH	Receptor-like serine/threonine-protein kinase SD1-8 OS=Arabidopsis thaliana GN=SD18 PE=1 SV=1	SD18
MD14G1015300	4.86142	5.50755	11.9746	19.5699	1747.08	1030.68	0.76134	0.12189	0.41712	FALSE	3865.11	1157.82	1.7391	0.0007392	0.0093484	UP	6103.7	1071.29	2.5103	2.32e-09	1.58e-07	UP	sp|Q8LK56|DME_ARATH	Transcriptional activator DEMETER OS=Arabidopsis thaliana GN=DME PE=1 SV=2	DME
MD03G1188800	28.926	32.9156	40.5647	34.5971	3462.64	1930.04	0.84325	0.13006	0.43204	FALSE	4050.36	2167.26	0.90218	0.0060142	0.045151	UP	3342.1	2006.42	0.73613	0.056595	0.24604	FALSE	sp|Q8H125|SCL5_ARATH	Scarecrow-like protein 5 OS=Arabidopsis thaliana GN=SCL5 PE=2 SV=1	SCL5
MD03G1189500	2.09886	1.06981	1.10068	0.54461	260.713	317.024	-0.28213	0.44585	0.7887	FALSE	249.755	356.135	-0.51191	0.18281	0.46007	FALSE	115.693	330.493	-1.5143	0.0023611	0.022587	DOWN	sp|Q9FJ57|TRN1_ARATH	Protein TORNADO 1 OS=Arabidopsis thaliana GN=TRN1 PE=2 SV=1	TRN1
MD03G1189600	44.1026	13.3744	16.8706	15.9747	1074.34	2291.81	-1.093	0.033139	0.20255	FALSE	1300.77	2573.6	-0.98443	0.0040976	0.034304	DOWN	1192.64	2385.16	-0.99992	0.018868	0.11207	FALSE	--	--	0
MD03G1190400	47.9848	13.5785	15.7223	16.8011	1998.68	4519.3	-1.1771	0.019658	0.14736	FALSE	2185.27	5074.24	-1.2154	0.00035127	0.0052391	DOWN	2304.3	4700.32	-1.0284	0.010248	0.070991	FALSE	sp|Q9SZ11|GPDL3_ARATH	Glycerophosphodiester phosphodiesterase GDPDL3 OS=Arabidopsis thaliana GN=GDPDL3 PE=1 SV=3	GDPDL3
MD07G1298900	12.5128	33.7408	20.1339	10.3343	5703.22	1309.38	2.1229	0.007045	0.076402	FALSE	3174.54	1470.81	1.1099	0.00096806	0.011523	UP	1560.46	1365.08	0.19299	0.54365	0.88534	FALSE	sp|Q9FK23|MTEF8_ARATH	Transcription termination factor MTERF8, chloroplastic OS=Arabidopsis thaliana GN=MTERF8 PE=1 SV=1	MTERF8
MD03G1192000	0.885428	4.01931	50.2126	89.6166	81.2195	11.6307	2.8039	0.00053402	0.013151	UP	962.517	13.0718	6.2023	6.71e-05	0.0013887	UP	1655.31	12.2027	7.0838	0.00024857	0.0036663	UP	--	--	0
MD03G1192600	48.2902	66.5902	82.2561	61.4706	5341.93	2592.34	1.0431	0.033861	0.20524	FALSE	6674.76	2910.94	1.1972	0.00032175	0.0048883	UP	4890.6	2696.15	0.85911	0.057498	0.24872	FALSE	sp|P48528|PPX2_ARATH	Serine/threonine-protein phosphatase PP-X isozyme 2 OS=Arabidopsis thaliana GN=PPX2 PE=2 SV=2	PPX2
MD03G1192700	4.07959	0.867771	1.38826	2.23804	94.8672	298.81	-1.6552	0.005408	0.064704	FALSE	149.55	335.633	-1.1663	0.0034875	0.030462	DOWN	238.348	311.295	-0.38521	0.40244	0.78039	FALSE	sp|Q9MAU5|Y1049_ARATH	Putative BPI/LBP family protein At1g04970 OS=Arabidopsis thaliana GN=At1g04970 PE=2 SV=1	At1g04970
MD15G1366400	1.98591	0.322248	0.488993	0.85399	16.8269	77.4048	-2.2017	0.0043155	0.055692	FALSE	28.1082	86.9278	-1.6288	0.0030033	0.027229	DOWN	48.3574	80.4869	-0.73502	0.19928	0.54451	FALSE	sp|Q9FK23|MTEF8_ARATH	Transcription termination factor MTERF8, chloroplastic OS=Arabidopsis thaliana GN=MTERF8 PE=1 SV=1	MTERF8
MD03G1193200	35.7628	13.2358	15.2386	11.1967	1475.78	2783.28	-0.91532	0.11314	0.40175	FALSE	1780.24	3124.9	-0.81174	0.018619	0.10159	FALSE	1254.08	2893.23	-1.2061	0.0038917	0.0337	DOWN	sp|Q9FLP0|MA651_ARATH	65-kDa microtubule-associated protein 1 OS=Arabidopsis thaliana GN=MAP65-1 PE=1 SV=1	MAP65-1
MD03G1193400	8.52388	3.37566	3.56057	1.37777	149.285	282.033	-0.91779	0.34794	0.7022	FALSE	169.931	316.545	-0.89747	0.13356	0.37874	FALSE	63.6957	292.815	-2.2007	0.00096034	0.011018	DOWN	--	--	0
MD03G1194400	0.812559	1.86197	2.5083	1.3607	35.1691	11.0994	1.6638	0.15224	0.46739	FALSE	51.4629	12.4768	2.0443	0.0017227	0.018033	UP	26.3651	11.5785	1.1872	0.13499	0.43465	FALSE	--	--	0
MD03G1194500	1.2436	0.407651	0.188628	0.882369	23.612	50.7455	-1.1038	0.18674	0.5204	FALSE	10.9315	57.0113	-2.3828	0.00055394	0.0074086	DOWN	49.5253	52.958	-0.096684	0.89704	1	FALSE	sp|Q9ZU91|E133_ARATH	Glucan endo-1,3-beta-glucosidase 3 OS=Arabidopsis thaliana GN=At2g01630 PE=1 SV=2	At2g01630
MD03G1195000	11.3231	5.19491	3.98853	1.90103	207.399	278.295	-0.4242	0.29145	0.64694	FALSE	141.464	312.555	-1.1437	0.0056196	0.042969	DOWN	67.713	289.747	-2.0973	1.4e-05	0.00032368	DOWN	--	--	0
MD03G1196100	22.9777	9.48558	4.78944	0.97136	735.91	1216.75	-0.72543	0.15521	0.47186	FALSE	365.643	1366.72	-1.9022	2.43e-07	1.28e-05	DOWN	71.8296	1267.89	-4.1417	6.86e-18	2.79e-15	DOWN	sp|Q9LTQ0|RTL2_ARATH	Ribonuclease 3-like protein 2 OS=Arabidopsis thaliana GN=RTL2 PE=1 SV=1	RTL2
MD03G1196200	3.05623	0.379839	0.765941	1.24079	25.2778	155.424	-2.6203	0.00012261	0.0044555	DOWN	55.5386	174.539	-1.652	0.00041133	0.0058996	DOWN	88.6245	161.702	-0.86756	0.16344	0.48707	FALSE	sp|Q9LTQ0|RTL2_ARATH	Ribonuclease 3-like protein 2 OS=Arabidopsis thaliana GN=RTL2 PE=1 SV=1	RTL2
MD17G1015100	1.15861	0.160385	0.385132	0.425078	14.9471	79.0442	-2.4028	0.0017813	0.030902	DOWN	37.6705	88.739	-1.2361	0.023464	0.11977	FALSE	40.9832	82.0894	-1.0022	0.11337	0.38995	FALSE	sp|F4JVI3|MTEF5_ARATH	Transcription termination factor MTERF5, chloroplastic OS=Arabidopsis thaliana GN=MTERF5 PE=2 SV=1	MTERF5
MD03G1271600	7.09048	1.25457	2.27407	1.72997	108.613	444.93	-2.0344	0.00068398	0.015652	DOWN	206.604	499.603	-1.2739	0.00096555	0.011514	DOWN	153.034	462.978	-1.5971	0.00076381	0.0091646	DOWN	sp|Q9ZT96|MTEF4_ARATH	Transcription termination factor MTERF4, chloroplastic OS=Arabidopsis thaliana GN=MTERF4 PE=1 SV=1	MTERF4
MD02G1100800	1.54556	0.316498	0.368841	0.341742	45.6003	140.151	-1.6199	0.0074844	0.079348	FALSE	49.9052	157.382	-1.657	0.00025391	0.0040445	DOWN	45.6678	145.783	-1.6746	0.0010896	0.012162	DOWN	sp|O23530|SNC1_ARATH	Protein SUPPRESSOR OF npr1-1, CONSTITUTIVE 1 OS=Arabidopsis thaliana GN=SNC1 PE=1 SV=4	SNC1
MD03G1199000	0.206941	0.140867	0.431555	1.19246	7.25761	6.67248	0.12127	0.93379	1	FALSE	20.4433	7.49887	1.4469	0.1023	0.31945	FALSE	56.7475	6.9625	3.0269	0.00090396	0.010494	UP	sp|Q39366|LGUL_BRAOG	Putative lactoylglutathione lyase OS=Brassica oleracea var. gemmifera PE=2 SV=1	2
MD03G1200100	0.745067	3.68357	0.796752	1.75114	350.975	38.6511	3.1828	0.28322	0.63851	FALSE	65.9848	43.4081	0.60417	0.74094	0.95953	FALSE	135.753	40.2094	1.7554	0.0021646	0.0211	UP	sp|Q8GYM3|AUG4_ARATH	AUGMIN subunit 4 OS=Arabidopsis thaliana GN=AUG4 PE=1 SV=1	43681
MD03G1201200	0.269337	1.35698	1.076	0.546073	106.534	13.2307	3.0094	3.55e-05	0.0017793	UP	80.8756	14.8602	2.4442	0.007577	0.053416	FALSE	39.846	13.7703	1.5329	0.16977	0.49777	FALSE	--	--	0
MD03G1202300	2.90592	0.348436	0.77492	1.19291	132.381	820.384	-2.6316	8.78e-06	0.00063927	DOWN	322.669	921.41	-1.5138	3.19e-05	0.00075517	DOWN	483.072	853.603	-0.82133	0.066612	0.27429	FALSE	sp|O74415|YJL2_SCHPO	Uncharacterized protein C14G10.02 OS=Schizosaccharomyces pombe (strain 972 / ATCC 24843) GN=SPCC14G10.02 PE=4 SV=1	SPCC14G10.02
MD03G1202600	52.6369	127.227	78.9436	42.8249	3249.97	803.096	2.0168	0.048861	0.25504	FALSE	1827.55	902.016	1.0187	0.0043113	0.035588	UP	968.788	837.391	0.21028	0.70656	0.96711	FALSE	--	--	0
MD11G1292200	3.17951	0.327681	0.707596	0.531723	28.2606	187.148	-2.7273	4.15e-05	0.0019998	DOWN	60.5695	210.132	-1.7946	5.22e-05	0.0011359	DOWN	44.6607	194.596	-2.1234	5.28e-05	0.00099019	DOWN	sp|Q9ZT96|MTEF4_ARATH	Transcription termination factor MTERF4, chloroplastic OS=Arabidopsis thaliana GN=MTERF4 PE=1 SV=1	MTERF4
MD03G1203400	20.027	3.99353	6.78721	9.91903	84.6446	286.249	-1.7578	0.0030666	0.043976	DOWN	145.723	321.529	-1.1417	0.0027787	0.025684	DOWN	207.474	298.332	-0.52399	0.23163	0.59134	FALSE	sp|Q9LJU7|PPA18_ARATH	Purple acid phosphatase 18 OS=Arabidopsis thaliana GN=PAP18 PE=2 SV=1	PAP18
MD03G1203500	5.93668	4.29065	2.51744	1.26061	88.1825	90.7111	-0.040787	0.93885	1	FALSE	58.3446	101.86	-0.80391	0.085047	0.28406	FALSE	26.5313	94.3451	-1.8303	0.0048036	0.039611	DOWN	sp|Q94CF0|EHD1_ARATH	EH domain-containing protein 1 OS=Arabidopsis thaliana GN=EHD1 PE=1 SV=1	EHD1
MD03G1203700	5.1338	4.56782	2.60855	1.28678	363.223	302.765	0.26266	0.71886	0.9617	FALSE	232.244	340.03	-0.55002	0.13454	0.38066	FALSE	106.488	314.828	-1.5639	0.001744	0.017697	DOWN	sp|Q94CF0|EHD1_ARATH	EH domain-containing protein 1 OS=Arabidopsis thaliana GN=EHD1 PE=1 SV=1	EHD1
MD03G1203900	34.0012	7.17157	11.8623	15.3008	592.869	1886.06	-1.6696	0.0023105	0.036527	DOWN	966.582	2118.42	-1.132	0.0011607	0.013317	DOWN	1223.3	1964.87	-0.68366	0.1149	0.39319	FALSE	sp|Q9LJU7|PPA18_ARATH	Purple acid phosphatase 18 OS=Arabidopsis thaliana GN=PAP18 PE=2 SV=1	PAP18
MD03G1204500	0	0.272103	1.50395	5.02031	13.5411	0	Inf	0.085135	0.34524	FALSE	77.4798	0	Inf	0.051223	0.20344	FALSE	238.965	0	Inf	1.7e-08	8.96e-07	UP	sp|B8AVF0|BGL12_ORYSI	Beta-glucosidase 12 OS=Oryza sativa subsp. indica GN=BGLU12 PE=3 SV=1	BGLU12
[truncated: 7,457 more rows]
